# Supplementary material for: Novel CRISPR-Cas9 BAP1 Knockout Pre-Clinical Tumor Model Recapitulates Human Melanoma Tumorigenesis and Immune Evolution
Source: Research Square preprint supplement (doi:10.21203/rs.3.rs-6134890/v1), 2025-04-09
Supplement: Supplementary file 1 [file 1add009647297b777fa9d2cb.xlsx]

## Sheet: indels_protein_coding_region
Chr	Start	End	Ref	Alt	Func.refGene	Gene.refGene	GeneDetail.refGene	ExonicFunc.refGene	AAChange.refGene	cytoBand
chr1	9546104	9546105	CT	-	exonic	Rrs1	.	frameshift deletion	Rrs1:NM_021511:exon1:c.581_582del:p.H197Qfs*18	1qA2
chr1	23866277	23866277	-	T	exonic	Smap1	.	frameshift insertion	Smap1:NM_001290683:exon5:c.179dupA:p.D61Gfs*30,Smap1:NM_028534:exon5:c.434dupA:p.D146Gfs*30,Smap1:NM_001357395:exon6:c.515dupA:p.D173Gfs*30	1qA5
chr1	85610809	85610811	AGA	-	exonic	Sp140	.	nonframeshift deletion	Sp140:NM_001013817:exon3:c.266_268del:p.K91del	1qC5
chr1	88212372	88212372	T	-	exonic	Ugt1a1	.	frameshift deletion	Ugt1a1:NM_201645:exon1:c.371delT:p.M124Sfs*3	1qD
chr1	88216158	88216158	T	-	exonic	Ugt1a1;Ugt1a10;Ugt1a2;Ugt1a5;Ugt1a6a;Ugt1a6b;Ugt1a7c;Ugt1a8;Ugt1a9	.	frameshift deletion	Ugt1a8:NM_001378375:exon4:c.1096delT:p.F366Sfs*21,Ugt1a2:NM_013701:exon4:c.1105delT:p.F369Sfs*21,Ugt1a10:NM_201641:exon4:c.1096delT:p.F366Sfs*21,Ugt1a7c:NM_201642:exon4:c.1099delT:p.F367Sfs*21,Ugt1a5:NM_201643:exon4:c.1093delT:p.F365Sfs*21,Ugt1a9:NM_201644:exon4:c.1090delT:p.F364Sfs*21,Ugt1a1:NM_201645:exon4:c.1111delT:p.F371Sfs*21,Ugt1a6a:NM_145079:exon5:c.1099delT:p.F367Sfs*21,Ugt1a6b:NM_201410…	1qD
chr1	88216161	88216162	AT	-	exonic	Ugt1a1;Ugt1a10;Ugt1a2;Ugt1a5;Ugt1a6a;Ugt1a6b;Ugt1a7c;Ugt1a8;Ugt1a9	.	frameshift deletion	Ugt1a8:NM_001378375:exon4:c.1099_1100del:p.I367Hfs*10,Ugt1a2:NM_013701:exon4:c.1108_1109del:p.I370Hfs*10,Ugt1a10:NM_201641:exon4:c.1099_1100del:p.I367Hfs*10,Ugt1a7c:NM_201642:exon4:c.1102_1103del:p.I368Hfs*10,Ugt1a5:NM_201643:exon4:c.1096_1097del:p.I366Hfs*10,Ugt1a9:NM_201644:exon4:c.1093_1094del:p.I365Hfs*10,Ugt1a1:NM_201645:exon4:c.1114_1115del:p.I372Hfs*10,Ugt1a6a:NM_145079:exon5:c.1102_1103de…	1qD
chr1	88218255	88218255	C	-	exonic	Ugt1a1;Ugt1a10;Ugt1a2;Ugt1a5;Ugt1a6a;Ugt1a6b;Ugt1a7c;Ugt1a8;Ugt1a9	.	frameshift deletion	Ugt1a8:NM_001378375:exon5:c.1424delC:p.H476Mfs*13,Ugt1a2:NM_013701:exon5:c.1433delC:p.H479Mfs*13,Ugt1a10:NM_201641:exon5:c.1424delC:p.H476Mfs*13,Ugt1a7c:NM_201642:exon5:c.1427delC:p.H477Mfs*13,Ugt1a5:NM_201643:exon5:c.1421delC:p.H475Mfs*13,Ugt1a9:NM_201644:exon5:c.1418delC:p.H474Mfs*13,Ugt1a1:NM_201645:exon5:c.1439delC:p.H481Mfs*13,Ugt1a6a:NM_145079:exon6:c.1427delC:p.H477Mfs*13,Ugt1a6b:NM_201410…	1qD
chr1	88232258	88232259	CC	-	exonic	Mroh2a	.	frameshift deletion	Mroh2a:NM_001281466:exon6:c.571_572del:p.P191Lfs*27	1qD
chr1	88237911	88237921	GATACTGTAAA	-	exonic	Mroh2a	.	frameshift deletion	Mroh2a:NM_001281466:exon14:c.1501_1511del:p.T502Hfs*11	1qD
chr1	88266279	88266329	CTGGGAGGGCTTGCTCCGGGGGCAGTGTGTCCTGTTCTTGTGCAGCCCCTG	-	exonic	A730008H23Rik;Hjurp	.	nonframeshift deletion	A730008H23Rik:NM_172505:exon5:c.628_678del:p.Q210_Q226del,Hjurp:NM_198652:exon8:c.856_906del:p.Q286_Q302del	1qD
chr1	88266524	88266524	-	T	exonic	A730008H23Rik;Hjurp	.	frameshift insertion	A730008H23Rik:NM_172505:exon5:c.432dupA:p.L145Tfs*14,Hjurp:NM_198652:exon8:c.660dupA:p.L221Tfs*14	1qD
chr1	171356617	171356702	AGGTAGGAAGGCCGCAGAGAAACAGAGTGATTGGATGGAGGCTTGTGGGGATCAGGACGCATTCTGAGGTCTTGTTCTCCTACCCT	-	exonic	Pfdn2	.	frameshift deletion	Pfdn2:NM_001360824:exon2:c.163_164del:p.S55Pfs*11,Pfdn2:NM_001360825:exon2:c.19_20del:p.S7Pfs*11,Pfdn2:NM_011070:exon2:c.163_164del:p.S55Pfs*11	1qH3
chr1	192846743	192846745	GAG	-	exonic	Sertad4	.	nonframeshift deletion	Sertad4:NM_001177794:exon4:c.762_764del:p.S256del,Sertad4:NM_198247:exon4:c.762_764del:p.S256del	1qH6
chr10	60300058	60300146	GGTAAGTCCACGGCACACTGAGGGAAGAAGGGGCCGCTCTCCATTAAGGAGCACTTGCCAGTGTTAAGCCCTGTGTCGTCCTTTCTGTA	-	exonic	Psap	.	frameshift deletion	Psap:NM_001146120:exon10:c.1282delG:p.A428Pfs*72,Psap:NM_001146121:exon10:c.1288delG:p.A430Pfs*72,Psap:NM_001146122:exon10:c.1279delG:p.A427Pfs*72,Psap:NM_001146123:exon10:c.1255delG:p.A419Pfs*72,Psap:NM_001146124:exon10:c.1273delG:p.A425Pfs*72,Psap:NM_011179:exon11:c.1291delG:p.A431Pfs*72	10qB4
chr10	79738034	79738034	A	-	exonic	Polrmt	.	frameshift deletion	Polrmt:NM_172551:exon13:c.2976delT:p.Q993Rfs*33	10qC1
chr10	118164313	118164313	-	GGG	exonic	Mdm1	.	nonframeshift insertion	Mdm1:NM_001162905:exon12:c.1715_1716insGGG:p.D572delinsEG,Mdm1:NM_010785:exon12:c.1820_1821insGGG:p.D607delinsEG,Mdm1:NM_148922:exon12:c.1820_1821insGGG:p.D607delinsEG,Mdm1:NM_001162904:exon13:c.1850_1851insGGG:p.D617delinsEG	10qD2
chr11	46406718	46406780	CAGCAGCAGGGACGGCAGGGCCAGCAGCAGGGACGGCAGGGGCAGCAGCAGGGACGGCAGGGG	-	exonic	Fam71b	.	nonframeshift deletion	Fam71b:NM_001013783:exon2:c.848_910del:p.P290_G310del	11qB1.1
chr11	50803916	50803921	CCGTCT	-	exonic	Adamts2	.	nonframeshift deletion	Adamts2:NM_175643:exon22:c.3529_3534del:p.S1178_P1179del	11qB1.3
chr11	51048405	51048405	T	-	exonic	Olfr1375	.	stopgain	Olfr1375:NM_146516:exon1:c.297delT:p.L100*	11qB1.3
chr11	51048407	51048407	-	G	exonic	Olfr1375	.	frameshift insertion	Olfr1375:NM_146516:exon1:c.300dupG:p.T101Dfs*83	11qB1.3
chr11	51048710	51048711	CC	-	exonic	Olfr1375	.	frameshift deletion	Olfr1375:NM_146516:exon1:c.602_603del:p.A201Vfs*43	11qB1.3
chr11	51048714	51048714	-	TC	exonic	Olfr1375	.	frameshift insertion	Olfr1375:NM_146516:exon1:c.606_607insTC:p.L203Sfs*73	11qB1.3
chr11	51048969	51048969	T	-	exonic	Olfr1375	.	frameshift deletion	Olfr1375:NM_146516:exon1:c.861delT:p.F289Sfs*5	11qB1.3
chr11	51049029	51049029	-	A	exonic	Olfr1375	.	frameshift insertion	Olfr1375:NM_146516:exon1:c.922dupA:p.R308Kfs*4	11qB1.3
chr11	51049035	51049035	C	-	exonic	Olfr1375	.	frameshift deletion	Olfr1375:NM_146516:exon1:c.927delC:p.S310Lfs*4	11qB1.3
chr11	54110238	54110243	GGTGTT	-	exonic	P4ha2	.	nonframeshift deletion	P4ha2:NM_001136076:exon3:c.12_17del:p.V9_L10del,P4ha2:NM_011031:exon3:c.12_17del:p.V9_L10del	11qB1.3
chr11	71123907	71123909	GAA	-	exonic	Nlrp1a	.	nonframeshift deletion	Nlrp1a:NM_001004142:exon3:c.514_516del:p.F172del	11qB4
chr12	74298806	74298807	CA	-	exonic	Dbpht2	.	frameshift deletion	Dbpht2:NM_198866:exon1:c.4_5del:p.I9Tfs*63	12qC3
chr13	66431237	66431237	-	A	exonic	2410141K09Rik	.	stopgain	2410141K09Rik:NM_001290196:exon4:c.1185_1186insT:p.S396*	13qB3
chr13	66431239	66431239	-	T	exonic	2410141K09Rik	.	frameshift insertion	2410141K09Rik:NM_001290196:exon4:c.1183_1184insA:p.L395Hfs*8	13qB3
chr13	66431241	66431242	CC	-	exonic	2410141K09Rik	.	frameshift deletion	2410141K09Rik:NM_001290196:exon4:c.1181_1182del:p.R394Tfs*8	13qB3
chr16	32752623	32752623	-	C	exonic	Muc4	.	frameshift insertion	Muc4:NM_080457:exon2:c.2501dupC:p.S835Kfs*15	16qB3
chr16	32752628	32752628	C	-	exonic	Muc4	.	frameshift deletion	Muc4:NM_080457:exon2:c.2505delC:p.P836Qfs*3	16qB3
chr16	32755752	32755752	-	GG	exonic	Muc4	.	frameshift insertion	Muc4:NM_080457:exon4:c.5625_5626insGG:p.I1876Gfs*2	16qB3
chr16	32755754	32755754	T	-	exonic	Muc4	.	frameshift deletion	Muc4:NM_080457:exon4:c.5627delT:p.I1876Kfs*2	16qB3
chr16	32755757	32755757	T	-	exonic	Muc4	.	frameshift deletion	Muc4:NM_080457:exon4:c.5630delT:p.V1877Gfs*14	16qB3
chr16	33497343	33497343	A	-	exonic	Zfp148	.	nonframeshift deletion	Zfp148:NM_001358569:exon9:c.2384delA:p.X795X,Zfp148:NM_001358570:exon9:c.2384delA:p.X795X,Zfp148:NM_011749:exon9:c.2384delA:p.X795X	16qB3
chr16	98010822	98010823	AA	-	exonic	B230307C23Rik	.	frameshift deletion	B230307C23Rik:NM_001362093:exon4:c.895_896del:p.K299Afs*3	16qC4
chr16	98011652	98011652	C	-	exonic	B230307C23Rik	.	frameshift deletion	B230307C23Rik:NM_001362093:exon4:c.1725delC:p.P576Lfs*68	16qC4
chr17	6737780	6737781	CA	-	exonic	Sytl3	.	frameshift deletion	Sytl3:NM_183368:exon9:c.1153_1154del:p.H385Qfs*20,Sytl3:NM_183370:exon13:c.1183_1184del:p.H395Qfs*20,Sytl3:NM_031395:exon16:c.1768_1769del:p.H590Qfs*20	17qA1
chr17	23359880	23359880	A	-	exonic	Vmn2r115	.	frameshift deletion	Vmn2r115:NM_001104579:exon6:c.2326delA:p.N776Mfs*6	17qA3.3
chr17	23359989	23359991	TCT	-	exonic	Vmn2r115	.	nonframeshift deletion	Vmn2r115:NM_001104579:exon6:c.2435_2437del:p.F813del	17qA3.3
chr17	23360127	23360127	A	-	exonic	Vmn2r115	.	stoploss	Vmn2r115:NM_001104579:exon6:c.2573delA:p.*858del	17qA3.3
chr17	23401727	23401729	TTT	-	exonic	Vmn2r116	.	nonframeshift deletion	Vmn2r116:NM_001104580:exon6:c.2434_2436del:p.F812del	17qA3.3
chr17	23477501	23477501	C	-	exonic	Vmn2r117	.	frameshift deletion	Vmn2r117:NM_001104581:exon3:c.931delG:p.D311Tfs*30	17qA3.3
chr17	23477505	23477505	-	T	exonic	Vmn2r117	.	frameshift insertion	Vmn2r117:NM_001104581:exon3:c.926_927insA:p.M309Ifs*8	17qA3.3
chr17	23477728	23477728	T	-	exonic	Vmn2r117	.	frameshift deletion	Vmn2r117:NM_001104581:exon3:c.704delA:p.N235Ifs*10	17qA3.3
chr17	23477744	23477745	TT	-	exonic	Vmn2r117	.	frameshift deletion	Vmn2r117:NM_001104581:exon3:c.687_688del:p.E231Dfs*26	17qA3.3
chr17	23479466	23479466	G	-	exonic	Vmn2r117	.	frameshift deletion	Vmn2r117:NM_001104581:exon1:c.132delC:p.F45Sfs*2	17qA3.3
chr17	23479514	23479514	C	-	exonic	Vmn2r117	.	stopgain	Vmn2r117:NM_001104581:exon1:c.84delG:p.I29*	17qA3.3
chr17	45568540	45568540	A	-	exonic	Hsp90ab1	.	frameshift deletion	Hsp90ab1:NM_008302:exon10:c.1754delT:p.V585Gfs*8	17qB3
chr17	48359949	48359951	CTG	-	exonic	Treml1	.	nonframeshift deletion	Treml1:NM_001289451:exon1:c.13_15del:p.L12del,Treml1:NM_001289457:exon1:c.13_15del:p.L12del,Treml1:NM_027763:exon1:c.13_15del:p.L12del	17qC
chr18	57294020	57294020	-	GC	exonic	Megf10	.	frameshift insertion	Megf10:NM_001001979:exon25:c.3409_3410insGC:p.N1137Sfs*43	18qD3
chr18	57294021	57294021	-	GCAGCAG	exonic	Megf10	.	frameshift insertion	Megf10:NM_001001979:exon25:c.3410_3411insGCAGCAG:p.N1137Kfs*13	18qD3
chr18	60299939	60299939	-	AAC	exonic	F830016B08Rik	.	nonframeshift insertion	F830016B08Rik:NM_001101475:exon2:c.93_94insAAC:p.E31_K32insN	18qD3
chr18	67405307	67405307	-	CTCCTT	exonic	Afg3l2	.	nonframeshift insertion	Afg3l2:NM_027130:exon17:c.2379_2380insAAGGAG:p.E793_E794insKE	18qE1
chr18	67794818	67794818	-	TGCTGACAC	exonic	Seh1l	.	nonframeshift insertion	Seh1l:NM_001360934:exon9:c.1172_1173insTGCTGACAC:p.A392_N393insDTA	18qE1
chr18	70468102	70468102	-	TTC	exonic	4930503L19Rik	.	nonframeshift insertion	4930503L19Rik:NM_001379430:exon4:c.653_654insGAA:p.E217_N218insK,4930503L19Rik:NM_001379431:exon4:c.707_708insGAA:p.E235_N236insK,4930503L19Rik:NM_001379432:exon4:c.707_708insGAA:p.E235_N236insK,4930503L19Rik:NM_001379433:exon4:c.707_708insGAA:p.E235_N236insK,4930503L19Rik:NM_172967:exon4:c.707_708insGAA:p.E235_N236insK	18qE2
chr18	70469639	70469647	GGCGCTGTC	-	exonic	4930503L19Rik	.	nonframeshift deletion	4930503L19Rik:NM_001379430:exon3:c.94_102del:p.D32_A34del,4930503L19Rik:NM_001379431:exon3:c.94_102del:p.D32_A34del,4930503L19Rik:NM_001379432:exon3:c.94_102del:p.D32_A34del,4930503L19Rik:NM_001379433:exon3:c.94_102del:p.D32_A34del,4930503L19Rik:NM_172967:exon3:c.94_102del:p.D32_A34del	18qE2
chr19	21598334	21598334	-	GGAATAACGAT	exonic	1110059E24Rik	.	frameshift insertion	1110059E24Rik:NM_025423:exon4:c.323_324insATCGTTATTCC:p.F109Sfs*36	19qB
chr19	57132950	57132950	C	-	exonic	Ablim1	.	frameshift deletion	Ablim1:NM_001103177:exon6:c.578delG:p.G193Afs*15,Ablim1:NM_001290813:exon6:c.806delG:p.G269Afs*15,Ablim1:NM_001290815:exon6:c.578delG:p.G193Afs*15,Ablim1:NM_001290816:exon6:c.578delG:p.G193Afs*15,Ablim1:NM_001362445:exon6:c.575delG:p.G192Afs*15,Ablim1:NM_001362446:exon6:c.350delG:p.G117Afs*15,Ablim1:NM_178688:exon6:c.806delG:p.G269Afs*15	19qD2
chr2	80528666	80528666	-	ACTGTCAGGAAAGACAGAAAACAGTCTAACCGCCACACTCCTAGCTCACACGCAAACAAGTGATACAGCACCC	exonic	Nckap1	.	stopgain	Nckap1:NM_001355411:exon17:c.1623_1624insGGGTGCTGTATCACTTGTTTGCGTGTGAGCTAGGAGTGTGGCGGTTAGACTGTTTTCTGTCTTTCCTGACAGT:p.F542Gfs*11,Nckap1:NM_016965:exon17:c.1629_1630insGGGTGCTGTATCACTTGTTTGCGTGTGAGCTAGGAGTGTGGCGGTTAGACTGTTTTCTGTCTTTCCTGACAGT:p.F544Gfs*11,Nckap1:NM_001290745:exon18:c.1647_1648insGGGTGCTGTATCACTTGTTTGCGTGTGAGCTAGGAGTGTGGCGGTTAGACTGTTTTCTGTCTTTCCTGACAGT:p.F550Gfs*11,Nckap1:NM_00135541…	2qC3
chr2	85608814	85608814	A	-	exonic	Olfr1000	.	frameshift deletion	Olfr1000:NM_001011695:exon1:c.95delT:p.F32Sfs*14	2qD
chr2	86122761	86122761	-	GT	exonic	Olfr1038-ps	.	unknown	UNKNOWN	2qD
chr2	86413660	86413704	GGAGTGGTTTACAGATGGCCACATAACGGTCATAAGACATTGCAG	-	exonic	Olfr1061	.	nonframeshift deletion	Olfr1061:NM_207134:exon1:c.347_391del:p.S116_L131delinsF	2qD
chr2	86413708	86413708	G	-	exonic	Olfr1061	.	frameshift deletion	Olfr1061:NM_207134:exon1:c.343delC:p.L115Ffs*30	2qD
chr2	86806079	86806079	-	T	exonic	Olfr141	.	frameshift insertion	Olfr141:NM_181818:exon1:c.918dupA:p.L307Ifs*20	2qD
chr2	86872873	86872873	G	-	exonic	Olfr1096	.	frameshift deletion	Olfr1096:NM_001370760:exon2:c.849delC:p.M284Cfs*2	2qD
chr3	86348804	86348830	TTCAAGTGGAAGCACCTATTACTAAAA	-	exonic	Lrba	.	nonframeshift deletion	Lrba:NM_001077687:exon23:c.3452_3478del:p.Q1152_I1160del,Lrba:NM_001077688:exon23:c.3452_3478del:p.Q1152_I1160del,Lrba:NM_030695:exon23:c.3452_3478del:p.Q1152_I1160del	3qF1
chr3	87443673	87443675	TTC	-	exonic	Fcrl5	.	nonframeshift deletion	Fcrl5:NM_001113238:exon3:c.225_227del:p.S76del,Fcrl5:NM_183222:exon4:c.489_491del:p.S164del	3qF1
chr3	87931711	87931711	-	AAG	exonic	Isg20l2	.	nonframeshift insertion	Isg20l2:NM_177663:exon2:c.228_229insAAG:p.K79_E80insK	3qF1
chr3	90341919	90341921	ACA	-	exonic	Gatad2b	.	nonframeshift deletion	Gatad2b:NM_001379656:exon2:c.263_265del:p.N90del,Gatad2b:NM_001379657:exon2:c.263_265del:p.N90del,Gatad2b:NM_139304:exon2:c.263_265del:p.N90del,Gatad2b:NM_001379655:exon3:c.263_265del:p.N90del	3qF1
chr4	63171423	63171423	-	GGGCCTCCACCCGGC	exonic	Kif12	.	nonframeshift insertion	Kif12:NM_001317352:exon4:c.179_180insGCCGGGTGGAGGCCC:p.P60_D61insPGGGP,Kif12:NM_010616:exon4:c.179_180insGCCGGGTGGAGGCCC:p.P60_D61insPGGGP	4qB3
chr4	126165423	126165427	CTTCT	-	exonic	Thrap3	.	frameshift deletion	Thrap3:NM_146153:exon11:c.2825_2829del:p.E942Gfs*8,Thrap3:NM_001356455:exon12:c.2825_2829del:p.E942Gfs*8,Thrap3:NM_001356456:exon12:c.2825_2829del:p.E942Gfs*8	4qD2.2
chr4	130137508	130137509	AG	-	exonic	Hcrtr1	.	frameshift deletion	Hcrtr1:NM_001163027:exon3:c.120_121del:p.Y41Pfs*150,Hcrtr1:NM_198959:exon3:c.120_121del:p.Y41Pfs*150	4qD2.2
chr4	146537803	146537803	-	AA	exonic	Zfp981	.	frameshift insertion	Zfp981:NM_001243139:exon4:c.1184_1185insAA:p.V396Kfs*84,Zfp981:NM_001243138:exon5:c.1184_1185insAA:p.V396Kfs*84	4qE1
chr4	146537806	146537807	TT	-	exonic	Zfp981	.	frameshift deletion	Zfp981:NM_001243139:exon4:c.1187_1188del:p.V396Afs*15,Zfp981:NM_001243138:exon5:c.1187_1188del:p.V396Afs*15	4qE1
chr4	147512434	147512436	TCT	-	exonic	Zfp982	.	nonframeshift deletion	Zfp982:NM_001039209:exon3:c.247_249del:p.S84del,Zfp982:NM_001365422:exon4:c.247_249del:p.S84del,Zfp982:NM_001371349:exon4:c.247_249del:p.S84del,Zfp982:NM_001371348:exon5:c.247_249del:p.S84del	4qE1
chr4	147512517	147512517	C	-	exonic	Zfp982	.	frameshift deletion	Zfp982:NM_001039209:exon3:c.330delC:p.S112Pfs*34,Zfp982:NM_001365422:exon4:c.330delC:p.S112Pfs*34,Zfp982:NM_001371349:exon4:c.330delC:p.S112Pfs*34,Zfp982:NM_001371348:exon5:c.330delC:p.S112Pfs*34	4qE1
chr4	147584193	147584194	TT	-	exonic	Zfp985	.	frameshift deletion	Zfp985:NM_001014397:exon6:c.1517_1518del:p.I506Kfs*18	4qE1
chr4	147584198	147584198	C	-	exonic	Zfp985	.	frameshift deletion	Zfp985:NM_001014397:exon6:c.1522delC:p.H508Ifs*26	4qE1
chr4	147754930	147755013	TTCTCTCCTGTATGAATTCTCTGATGAATATTAAGATTGGATTTTTGGGTAAAGCATTTGTCACATTCACTGCATTTGTAAGGG	-	exonic	Zfp984	.	nonframeshift deletion	Zfp984:NM_001127189:exon6:c.1380_1463del:p.N460_E487del	4qE1
chr4_GL456216_random	34238	34238	C	-	exonic	Dhrsx	.	frameshift deletion	Dhrsx:NM_001368261:exon4:c.387delC:p.A131Pfs*69,Dhrsx:NM_001368262:exon4:c.381delC:p.A129Pfs*69,Dhrsx:NM_001033326:exon5:c.489delC:p.A165Pfs*69	.
chr5	25950853	25950855	CTT	-	exonic	Gm21671	.	nonframeshift deletion	Gm21671:NM_001281516:exon4:c.490_492del:p.K164del	5qB1
chr5	62698295	62698296	GG	-	exonic	Arap2	.	frameshift deletion	Arap2:NM_178407:exon9:c.1796_1797del:p.A599Efs*17	5qC3.1
chr5	114138375	114138375	-	GGGGGGGCCCCCC	exonic	Ung	.	stoploss	Ung:NM_011677:exon6:c.887_888insGGGGGGGCCCCCC:p.*296delinsWGGPPTRPPAHRPHLSTAVLSAAAAAFAG*,Ung:NM_001040691:exon7:c.920_921insGGGGGGGCCCCCC:p.*307delinsWGGPPTRPPAHRPHLSTAVLSAAAAAFAG*	5qF
chr5	116444770	116444772	CTG	-	exonic	Srrm4	.	nonframeshift deletion	Srrm4:NM_026886:exon13:c.1623_1625del:p.S544del	5qF
chr5	124624334	124624334	-	AC	exonic	Tctn2	.	unknown	UNKNOWN	5qF
chr5	135217396	135217397	GA	-	exonic	Baz1b	.	frameshift deletion	Baz1b:NM_011714:exon7:c.1698_1699del:p.E570Nfs*12	5qG2
chr5	137152812	137152812	-	CG	exonic	Muc3	.	frameshift insertion	Muc3:NM_010843:exon3:c.588_589insCG:p.T197Rfs*11	5qG2
chr5	137152814	137152814	-	CATCACCAGTGG	exonic	Muc3	.	nonframeshift insertion	Muc3:NM_010843:exon3:c.586_587insCCACTGGTGATG:p.I196delinsTTGDV	5qG2
chr5	137152822	137152822	-	TCATCAGTTGTGGTGACTTCAGCAGTGGTGGTCACT	exonic	Muc3	.	nonframeshift insertion	Muc3:NM_010843:exon3:c.578_579insAGTGACCACCACTGCTGAAGTCACCACAACTGATGA:p.G192_D193insEVTTTAEVTTTD	5qG2
chr6	4756452	4756452	-	CACATCAGGATCCCCATCAGGATCCCCATCAGGATGCACATCAGGATCCACATCAGCATCCGGATCCCCATCAGGATCCTC	exonic	Peg10	.	unknown	UNKNOWN	6qA1
chr7	19081169	19081169	-	CCTCGGAT	exonic	Dmwd	.	frameshift insertion	Dmwd:NM_001374607:exon3:c.1743_1744insCCTCGGAT:p.L583Rfs*18,Dmwd:NM_010058:exon3:c.1743_1744insCCTCGGAT:p.L583Rfs*18	7qA3
chr7	141638851	141638856	GTGTGG	-	exonic	Muc6	.	nonframeshift deletion	Muc6:NM_001368953:exon31:c.5588_5593del:p.P1863_T1864del	7qF5
chr7	141638859	141639059	GTCACTGTGGAAGGTTGCGAGAGATGGGGTGCAGAGGTCCTGTCTGTGGAGAACGAGCTTTTGGTTTGTGTGGCAGCAGTGGTTGTATACGTGACAGGTACTGATGTATGAGGTGGTCTTGTGCCTTCCAGGGTGGTTGGAAGGACAGTCATCAGTGGCATGGAGGTAGAGGCCACTGATAGGGAGTGTGGGCTGGTTGGG	-	exonic	Muc6	.	nonframeshift deletion	Muc6:NM_001368953:exon31:c.5385_5585del:p.S1798_T1864del	7qF5
chr8	26160824	26160824	A	-	exonic	Thap1	.	frameshift deletion	Thap1:NM_199042:exon2:c.121delA:p.R42Gfs*31	8qA2
chr8	26160857	26160858	AG	-	exonic	Thap1	.	frameshift deletion	Thap1:NM_199042:exon2:c.154_155del:p.S52Hfs*12	8qA2
chr8	26160860	26160870	ATCTGCTCGGA	-	exonic	Thap1	.	frameshift deletion	Thap1:NM_199042:exon2:c.157_167del:p.I53Afs*8	8qA2
chr8	26160969	26160969	-	GAAGGAAGACCTGGAATCCCAAGAACAGCTTCCCTCTGCTTCACCCCCCTGCTTCCCAGGTTGATGGTGCTATT	exonic	Thap1	.	stopgain	Thap1:NM_199042:exon2:c.266_267insGAAGGAAGACCTGGAATCCCAAGAACAGCTTCCCTCTGCTTCACCCCCCTGCTTCCCAGGTTGATGGTGCTATT:p.P102Afs*9	8qA2
chr8	26162481	26162481	-	T	exonic	Thap1	.	frameshift insertion	Thap1:NM_199042:exon3:c.315_316insT:p.A106Cfs*5	8qA2
chr8	26162604	26162604	C	-	exonic	Thap1	.	frameshift deletion	Thap1:NM_199042:exon3:c.438delC:p.L147Cfs*50	8qA2
chr8	26162687	26162687	-	TGAAAAGCTCAAGACTGCCCAGCAG	exonic	Thap1	.	frameshift insertion	Thap1:NM_199042:exon3:c.521_522insTGAAAAGCTCAAGACTGCCCAGCAG:p.E179Tfs*31	8qA2
chr8	26162689	26162689	-	GTGCCGGC	exonic	Thap1	.	frameshift insertion	Thap1:NM_199042:exon3:c.523_524insGTGCCGGC:p.E175Gfs*25	8qA2
chr8	26162691	26162691	-	CAGGAGAGGCAGCTTGAA	exonic	Thap1	.	nonframeshift insertion	Thap1:NM_199042:exon3:c.525_526insCAGGAGAGGCAGCTTGAA:p.E175_K176insQERQLE	8qA2
chr8	69373018	69373101	CAAAGGCTTTACCACATTGATTACATACATACGGTTTCTCTCCAGTATGGATTCTTTCATGAATTTGAAGGTAAATTTGTTGTT	-	exonic	Gm10033	.	nonframeshift deletion	Gm10033:NM_001374599:exon4:c.1106_1189del:p.E369_F396del,Gm10033:NM_001374600:exon4:c.998_1081del:p.E333_F360del	8qB3.3
chr8	99024868	99024868	-	T	exonic	Cdh8	.	frameshift insertion	Cdh8:NM_001285913:exon13:c.2215dupA:p.I739Nfs*13	8qD1
chr8	99024868	99024868	-	TT	exonic	Cdh8	.	frameshift insertion	Cdh8:NM_001285913:exon13:c.2215_2216insAA:p.I739Kfs*2	8qD1
chr8	106742173	106742181	CCCAGAGTA	-	exonic	Tango6	.	nonframeshift deletion	Tango6:NM_173037:exon13:c.2300_2308del:p.Q768_T770del	8qD3
chr8	107061594	107061594	-	TAGC	exonic	Tmed6	.	nonframeshift insertion	Tmed6:NM_025458:exon4:c.719_720insGCTA:p.X240delinsX	8qD3
chr8	109623679	109623834	GACATCAGAGACACCTGCATCCAACAGCCCACCACAGGGGACATCAGAGACACCTGGATTCAGCAGCCCACCACAGGTGACAACAGCCACACTTGTATCCAGCAGCCCACCACAGGTGACATCAGAGACACCTGCATCCAGCAGCCCAACACAGGT	-	exonic	Pkd1l3	.	nonframeshift deletion	Pkd1l3:NM_001039700:exon5:c.1155_1310del:p.N393_S444del,Pkd1l3:NM_001286454:exon5:c.1155_1310del:p.N393_S444del,Pkd1l3:NM_181544:exon5:c.1155_1310del:p.N393_S444del	8qD3
chr8	129283322	129283324	AAG	-	exonic	Gm32856	.	nonframeshift deletion	Gm32856:NM_001346808:exon4:c.1038_1040del:p.R347del,Gm32856:NM_001376966:exon5:c.942_944del:p.R315del	8qE2
chr8	129283328	129283328	-	ACC	exonic	Gm32856	.	nonframeshift insertion	Gm32856:NM_001346808:exon4:c.1044_1045insACC:p.I348_H349insT,Gm32856:NM_001376966:exon5:c.948_949insACC:p.I316_H317insT	8qE2
chr8	129283409	129283409	G	-	exonic	Gm32856	.	frameshift deletion	Gm32856:NM_001346808:exon4:c.1125delG:p.N376Ifs*27,Gm32856:NM_001376966:exon5:c.1029delG:p.N344Ifs*27	8qE2
chr9	7465083	7465083	-	G	exonic	Mmp1a	.	unknown	UNKNOWN	9qA1
chr9	65280131	65280131	G	-	exonic	Cilp	.	frameshift deletion	Cilp:NM_173385:exon10:c.3507delG:p.G1170Afs*16,Cilp:NM_001364527:exon11:c.3210delG:p.G1071Afs*16	9qC
chr9	103355190	103355190	C	-	exonic	Cdv3	.	frameshift deletion	Cdv3:NM_175833:exon5:c.819delG:p.K274Sfs*19	9qF1
chr9	103355192	103355192	G	-	exonic	Cdv3	.	frameshift deletion	Cdv3:NM_175833:exon5:c.817delC:p.Q273Rfs*20	9qF1
chr9	103355194	103355204	TTCTCAAGCAC	-	exonic	Cdv3	.	frameshift deletion	Cdv3:NM_175833:exon5:c.805_815del:p.V269Sfs*16	9qF1
chr9	121493389	121493389	-	G	exonic	Cck	.	frameshift insertion	Cck:NM_001284508:exon3:c.356dupC:p.V120Cfs*6	9qF4
chrX	53690895	53690895	-	C	exonic	4933416I08Rik	.	unknown	UNKNOWN	XqA5
chrX	136533966	136533966	-	A	exonic	Kir3dl1	.	frameshift insertion	Kir3dl1:NM_001310690:exon8:c.904_905insA:p.G302Efs*39,Kir3dl1:NM_177749:exon9:c.1183_1184insA:p.G395Efs*39	XqF1
chrX	137015304	137015305	GT	-	exonic	Slc25a53	.	frameshift deletion	Slc25a53:NM_001082412:exon6:c.41_42del:p.Y14Sfs*76	XqF1
chrX	137015307	137015332	CAGCGGCACATGGCTCCCACAGCAGG	-	exonic	Slc25a53	.	frameshift deletion	Slc25a53:NM_001082412:exon6:c.14_39del:p.T5Ifs*77	XqF1

## Sheet: snps_protein_coding_region
Chr	Start	End	Ref	Alt	Func.refGene	Gene.refGene	GeneDetail.refGene	ExonicFunc.refGene	AAChange.refGene	cytoBand
chr1	9545577	9545577	G	A	exonic	Rrs1	.	synonymous SNV	Rrs1:NM_021511:exon1:c.G54A:p.A18A	1qA2
chr1	9545597	9545597	C	T	exonic	Rrs1	.	nonsynonymous SNV	Rrs1:NM_021511:exon1:c.C74T:p.T25M	1qA2
chr1	9545621	9545621	A	T	exonic	Rrs1	.	nonsynonymous SNV	Rrs1:NM_021511:exon1:c.A98T:p.E33V	1qA2
chr1	9545654	9545654	G	A	exonic	Rrs1	.	nonsynonymous SNV	Rrs1:NM_021511:exon1:c.G131A:p.R44H	1qA2
chr1	9545663	9545663	C	T	exonic	Rrs1	.	nonsynonymous SNV	Rrs1:NM_021511:exon1:c.C140T:p.P47L	1qA2
chr1	9545666	9545666	C	T	exonic	Rrs1	.	nonsynonymous SNV	Rrs1:NM_021511:exon1:c.C143T:p.T48I	1qA2
chr1	9545668	9545668	G	A	exonic	Rrs1	.	nonsynonymous SNV	Rrs1:NM_021511:exon1:c.G145A:p.V49M	1qA2
chr1	9545674	9545674	C	T	exonic	Rrs1	.	nonsynonymous SNV	Rrs1:NM_021511:exon1:c.C151T:p.R51C	1qA2
chr1	9545682	9545682	C	T	exonic	Rrs1	.	synonymous SNV	Rrs1:NM_021511:exon1:c.C159T:p.A53A	1qA2
chr1	9545684	9545684	G	T	exonic	Rrs1	.	nonsynonymous SNV	Rrs1:NM_021511:exon1:c.G161T:p.G54V	1qA2
chr1	9545685	9545685	G	T	exonic	Rrs1	.	synonymous SNV	Rrs1:NM_021511:exon1:c.G162T:p.G54G	1qA2
chr1	9545688	9545688	G	T	exonic	Rrs1	.	synonymous SNV	Rrs1:NM_021511:exon1:c.G165T:p.P55P	1qA2
chr1	9545691	9545691	G	A	exonic	Rrs1	.	synonymous SNV	Rrs1:NM_021511:exon1:c.G168A:p.S56S	1qA2
chr1	9545693	9545693	C	T	exonic	Rrs1	.	nonsynonymous SNV	Rrs1:NM_021511:exon1:c.C170T:p.P57L	1qA2
chr1	9545700	9545700	C	G	exonic	Rrs1	.	synonymous SNV	Rrs1:NM_021511:exon1:c.C177G:p.A59A	1qA2
chr1	9545762	9545762	C	A	exonic	Rrs1	.	nonsynonymous SNV	Rrs1:NM_021511:exon1:c.C239A:p.P80Q	1qA2
chr1	9545767	9545767	G	A	exonic	Rrs1	.	nonsynonymous SNV	Rrs1:NM_021511:exon1:c.G244A:p.E82K	1qA2
chr1	9545801	9545801	C	A	exonic	Rrs1	.	nonsynonymous SNV	Rrs1:NM_021511:exon1:c.C278A:p.P93Q	1qA2
chr1	9545808	9545808	C	G	exonic	Rrs1	.	synonymous SNV	Rrs1:NM_021511:exon1:c.C285G:p.P95P	1qA2
chr1	9545840	9545840	C	A	exonic	Rrs1	.	nonsynonymous SNV	Rrs1:NM_021511:exon1:c.C317A:p.P106H	1qA2
chr1	9545848	9545848	C	A	exonic	Rrs1	.	synonymous SNV	Rrs1:NM_021511:exon1:c.C325A:p.R109R	1qA2
chr1	9545860	9545860	C	A	exonic	Rrs1	.	nonsynonymous SNV	Rrs1:NM_021511:exon1:c.C337A:p.R113S	1qA2
chr1	9545875	9545875	G	C	exonic	Rrs1	.	nonsynonymous SNV	Rrs1:NM_021511:exon1:c.G352C:p.A118P	1qA2
chr1	9545876	9545876	C	T	exonic	Rrs1	.	nonsynonymous SNV	Rrs1:NM_021511:exon1:c.C353T:p.A118V	1qA2
chr1	9545894	9545894	G	T	exonic	Rrs1	.	nonsynonymous SNV	Rrs1:NM_021511:exon1:c.G371T:p.R124L	1qA2
chr1	9545925	9545925	C	A	exonic	Rrs1	.	nonsynonymous SNV	Rrs1:NM_021511:exon1:c.C402A:p.D134E	1qA2
chr1	9545944	9545944	C	A	exonic	Rrs1	.	synonymous SNV	Rrs1:NM_021511:exon1:c.C421A:p.R141R	1qA2
chr1	9545951	9545951	G	T	exonic	Rrs1	.	nonsynonymous SNV	Rrs1:NM_021511:exon1:c.G428T:p.R143L	1qA2
chr1	9545985	9545985	A	G	exonic	Rrs1	.	synonymous SNV	Rrs1:NM_021511:exon1:c.A462G:p.K154K	1qA2
chr1	9545992	9545992	C	G	exonic	Rrs1	.	nonsynonymous SNV	Rrs1:NM_021511:exon1:c.C469G:p.L157V	1qA2
chr1	9546013	9546013	G	T	exonic	Rrs1	.	nonsynonymous SNV	Rrs1:NM_021511:exon1:c.G490T:p.A164S	1qA2
chr1	9546016	9546016	G	A	exonic	Rrs1	.	nonsynonymous SNV	Rrs1:NM_021511:exon1:c.G493A:p.D165N	1qA2
chr1	9546138	9546138	C	A	exonic	Rrs1	.	synonymous SNV	Rrs1:NM_021511:exon1:c.C615A:p.A205A	1qA2
chr1	9546150	9546150	T	C	exonic	Rrs1	.	synonymous SNV	Rrs1:NM_021511:exon1:c.T627C:p.P209P	1qA2
chr1	9546153	9546153	T	G	exonic	Rrs1	.	synonymous SNV	Rrs1:NM_021511:exon1:c.T630G:p.T210T	1qA2
chr1	9546171	9546171	A	G	exonic	Rrs1	.	synonymous SNV	Rrs1:NM_021511:exon1:c.A648G:p.E216E	1qA2
chr1	9546180	9546180	C	T	exonic	Rrs1	.	synonymous SNV	Rrs1:NM_021511:exon1:c.C657T:p.G219G	1qA2
chr1	9546215	9546215	C	T	exonic	Rrs1	.	nonsynonymous SNV	Rrs1:NM_021511:exon1:c.C692T:p.S231L	1qA2
chr1	9546223	9546223	C	T	exonic	Rrs1	.	nonsynonymous SNV	Rrs1:NM_021511:exon1:c.C700T:p.R234C	1qA2
chr1	9546259	9546259	C	T	exonic	Rrs1	.	nonsynonymous SNV	Rrs1:NM_021511:exon1:c.C736T:p.R246W	1qA2
chr1	9546268	9546268	G	T	exonic	Rrs1	.	nonsynonymous SNV	Rrs1:NM_021511:exon1:c.G745T:p.G249C	1qA2
chr1	9546313	9546313	G	A	exonic	Rrs1	.	nonsynonymous SNV	Rrs1:NM_021511:exon1:c.G790A:p.E264K	1qA2
chr1	9546338	9546338	T	A	exonic	Rrs1	.	nonsynonymous SNV	Rrs1:NM_021511:exon1:c.T815A:p.L272H	1qA2
chr1	9546341	9546341	G	T	exonic	Rrs1	.	nonsynonymous SNV	Rrs1:NM_021511:exon1:c.G818T:p.R273L	1qA2
chr1	9546372	9546372	C	T	exonic	Rrs1	.	synonymous SNV	Rrs1:NM_021511:exon1:c.C849T:p.D283D	1qA2
chr1	9546377	9546377	C	T	exonic	Rrs1	.	nonsynonymous SNV	Rrs1:NM_021511:exon1:c.C854T:p.T285M	1qA2
chr1	9546572	9546572	C	G	exonic	Rrs1	.	nonsynonymous SNV	Rrs1:NM_021511:exon1:c.C1049G:p.A350G	1qA2
chr1	21384180	21384180	G	C	exonic	Khdc1b	.	nonsynonymous SNV	Khdc1b:NM_001113187:exon2:c.G106C:p.D36H	1qA4
chr1	26687267	26687267	G	A	exonic	4931408C20Rik	.	nonsynonymous SNV	4931408C20Rik:NM_001033764:exon1:c.C160T:p.P54S	1qA5
chr1	26687325	26687325	A	T	exonic	4931408C20Rik	.	synonymous SNV	4931408C20Rik:NM_001033764:exon1:c.T102A:p.G34G	1qA5
chr1	26687400	26687400	A	T	exonic	4931408C20Rik	.	nonsynonymous SNV	4931408C20Rik:NM_001033764:exon1:c.T27A:p.N9K	1qA5
chr1	40351846	40351846	T	G	exonic	Il1rl2	.	synonymous SNV	Il1rl2:NM_001356478:exon8:c.T948G:p.P316P,Il1rl2:NM_133193:exon8:c.T948G:p.P316P	1qB
chr1	55012178	55012178	T	G	exonic	Sf3b1	.	nonsynonymous SNV	Sf3b1:NM_031179:exon6:c.A590C:p.K197T	1qC1.2
chr1	58002917	58002917	G	C	exonic	Sgo2a	.	synonymous SNV	Sgo2a:NM_001177867:exon2:c.G102C:p.L34L,Sgo2a:NM_199007:exon5:c.G402C:p.L134L	1qC1.3
chr1	60909256	60909256	T	C	exonic	Ctla4	.	nonsynonymous SNV	Ctla4:NM_001281976:exon1:c.T86C:p.L29P,Ctla4:NM_009843:exon1:c.T86C:p.L29P	1qC2
chr1	63151632	63151632	A	G	exonic	Ndufs1	.	nonsynonymous SNV	Ndufs1:NM_001160040:exon14:c.T1472C:p.V491A,Ndufs1:NM_145518:exon14:c.T1472C:p.V491A,Ndufs1:NM_001160038:exon15:c.T1472C:p.V491A,Ndufs1:NM_001160039:exon15:c.T1472C:p.V491A	1qC2
chr1	74159381	74159381	C	G	exonic	Cxcr2	.	nonsynonymous SNV	Cxcr2:NM_009909:exon2:c.C1033G:p.P345A	1qC3
chr1	75486756	75486756	G	A	exonic	Obsl1	.	nonsynonymous SNV	Obsl1:NM_178884:exon19:c.C5291T:p.T1764M	1qC4
chr1	75528971	75528971	G	C	exonic	Stk11ip	.	nonsynonymous SNV	Stk11ip:NM_027886:exon14:c.G1283C:p.G428A	1qC4
chr1	78132263	78132263	C	G	exonic	Pax3	.	nonsynonymous SNV	Pax3:NM_001159520:exon5:c.G757C:p.A253P,Pax3:NM_008781:exon5:c.G757C:p.A253P	1qC4
chr1	85099523	85099523	C	T	exonic	A530032D15Rik	.	synonymous SNV	A530032D15Rik:NM_213615:exon3:c.G321A:p.K107K	1qC5
chr1	85099620	85099620	G	A	exonic	A530032D15Rik	.	nonsynonymous SNV	A530032D15Rik:NM_213615:exon3:c.C224T:p.A75V	1qC5
chr1	85247114	85247114	T	C	exonic	C130026I21Rik	.	synonymous SNV	C130026I21Rik:NM_001037909:exon7:c.A615G:p.G205G,C130026I21Rik:NM_175219:exon8:c.A699G:p.G233G	1qC5
chr1	85247125	85247125	G	C	exonic	C130026I21Rik	.	nonsynonymous SNV	C130026I21Rik:NM_001037909:exon7:c.C604G:p.P202A,C130026I21Rik:NM_175219:exon8:c.C688G:p.P230A	1qC5
chr1	85247131	85247131	G	C	exonic	C130026I21Rik	.	nonsynonymous SNV	C130026I21Rik:NM_001037909:exon7:c.C598G:p.P200A,C130026I21Rik:NM_175219:exon8:c.C682G:p.P228A	1qC5
chr1	85577329	85577329	A	C	exonic	Sp110	.	nonsynonymous SNV	Sp110:NM_030194:exon12:c.T1301G:p.F434C,Sp110:NM_175397:exon13:c.T1301G:p.F434C	1qC5
chr1	85586280	85586280	C	T	exonic	Sp110	.	nonsynonymous SNV	Sp110:NM_030194:exon7:c.G755A:p.R252H,Sp110:NM_175397:exon8:c.G755A:p.R252H	1qC5
chr1	85586282	85586282	T	C	exonic	Sp110	.	synonymous SNV	Sp110:NM_030194:exon7:c.A753G:p.K251K,Sp110:NM_175397:exon8:c.A753G:p.K251K	1qC5
chr1	85615204	85615204	T	C	exonic	Sp140	.	synonymous SNV	Sp140:NM_001013817:exon5:c.T435C:p.C145C	1qC5
chr1	85615212	85615212	C	G	exonic	Sp140	.	nonsynonymous SNV	Sp140:NM_001013817:exon5:c.C443G:p.T148R	1qC5
chr1	85620099	85620099	A	G	exonic	Sp140	.	nonsynonymous SNV	Sp140:NM_001013817:exon6:c.A546G:p.I182M	1qC5
chr1	85626133	85626133	G	A	exonic	Sp140	.	nonsynonymous SNV	Sp140:NM_001013817:exon8:c.G692A:p.R231K	1qC5
chr1	85643220	85643220	G	A	exonic	Sp140	.	synonymous SNV	Sp140:NM_001013817:exon16:c.G1380A:p.V460V	1qC5
chr1	85643221	85643221	A	G	exonic	Sp140	.	nonsynonymous SNV	Sp140:NM_001013817:exon16:c.A1381G:p.S461G	1qC5
chr1	88212021	88212021	G	A	exonic	Ugt1a1	.	nonsynonymous SNV	Ugt1a1:NM_201645:exon1:c.G20A:p.S7N	1qD
chr1	88212084	88212084	A	T	exonic	Ugt1a1	.	nonsynonymous SNV	Ugt1a1:NM_201645:exon1:c.A83T:p.H28L	1qD
chr1	88212093	88212093	G	A	exonic	Ugt1a1	.	nonsynonymous SNV	Ugt1a1:NM_201645:exon1:c.G92A:p.R31K	1qD
chr1	88212141	88212141	G	T	exonic	Ugt1a1	.	nonsynonymous SNV	Ugt1a1:NM_201645:exon1:c.G140T:p.G47V	1qD
chr1	88212244	88212244	C	T	exonic	Ugt1a1	.	synonymous SNV	Ugt1a1:NM_201645:exon1:c.C243T:p.F81F	1qD
chr1	88212317	88212317	T	C	exonic	Ugt1a1	.	nonsynonymous SNV	Ugt1a1:NM_201645:exon1:c.T316C:p.S106P	1qD
chr1	88212331	88212331	C	T	exonic	Ugt1a1	.	synonymous SNV	Ugt1a1:NM_201645:exon1:c.C330T:p.R110R	1qD
chr1	88212382	88212382	T	A	exonic	Ugt1a1	.	synonymous SNV	Ugt1a1:NM_201645:exon1:c.T381A:p.A127A	1qD
chr1	88212392	88212392	C	T	exonic	Ugt1a1	.	nonsynonymous SNV	Ugt1a1:NM_201645:exon1:c.C391T:p.H131Y	1qD
chr1	88212409	88212409	C	T	exonic	Ugt1a1	.	synonymous SNV	Ugt1a1:NM_201645:exon1:c.C408T:p.A136A	1qD
chr1	88212452	88212452	C	A	exonic	Ugt1a1	.	nonsynonymous SNV	Ugt1a1:NM_201645:exon1:c.C451A:p.L151M	1qD
chr1	88212465	88212465	T	C	exonic	Ugt1a1	.	nonsynonymous SNV	Ugt1a1:NM_201645:exon1:c.T464C:p.F155S	1qD
chr1	88212528	88212528	A	C	exonic	Ugt1a1	.	nonsynonymous SNV	Ugt1a1:NM_201645:exon1:c.A527C:p.K176T	1qD
chr1	88212549	88212549	C	T	exonic	Ugt1a1	.	nonsynonymous SNV	Ugt1a1:NM_201645:exon1:c.C548T:p.S183L	1qD
chr1	88212550	88212550	A	G	exonic	Ugt1a1	.	synonymous SNV	Ugt1a1:NM_201645:exon1:c.A549G:p.S183S	1qD
chr1	88212555	88212555	C	T	exonic	Ugt1a1	.	nonsynonymous SNV	Ugt1a1:NM_201645:exon1:c.C554T:p.A185V	1qD
chr1	88212568	88212568	C	T	exonic	Ugt1a1	.	synonymous SNV	Ugt1a1:NM_201645:exon1:c.C567T:p.P189P	1qD
chr1	88212637	88212637	G	A	exonic	Ugt1a1	.	synonymous SNV	Ugt1a1:NM_201645:exon1:c.G636A:p.V212V	1qD
chr1	88212655	88212655	C	T	exonic	Ugt1a1	.	synonymous SNV	Ugt1a1:NM_201645:exon1:c.C654T:p.A218A	1qD
chr1	88212672	88212672	T	G	exonic	Ugt1a1	.	nonsynonymous SNV	Ugt1a1:NM_201645:exon1:c.T671G:p.M224R	1qD
chr1	88212696	88212696	A	T	exonic	Ugt1a1	.	nonsynonymous SNV	Ugt1a1:NM_201645:exon1:c.A695T:p.Y232F	1qD
chr1	88212730	88212730	A	G	exonic	Ugt1a1	.	synonymous SNV	Ugt1a1:NM_201645:exon1:c.A729G:p.E243E	1qD
chr1	88212740	88212740	C	A	exonic	Ugt1a1	.	nonsynonymous SNV	Ugt1a1:NM_201645:exon1:c.C739A:p.Q247K	1qD
chr1	88212746	88212746	C	T	exonic	Ugt1a1	.	nonsynonymous SNV	Ugt1a1:NM_201645:exon1:c.C745T:p.L249F	1qD
chr1	88212778	88212778	A	G	exonic	Ugt1a1	.	synonymous SNV	Ugt1a1:NM_201645:exon1:c.A777G:p.R259R	1qD
chr1	88215054	88215054	C	T	exonic	Ugt1a1;Ugt1a10;Ugt1a2;Ugt1a5;Ugt1a6a;Ugt1a6b;Ugt1a7c;Ugt1a8;Ugt1a9	.	nonsynonymous SNV	Ugt1a8:NM_001378375:exon2:c.C866T:p.A289V,Ugt1a2:NM_013701:exon2:c.C875T:p.A292V,Ugt1a10:NM_201641:exon2:c.C866T:p.A289V,Ugt1a7c:NM_201642:exon2:c.C869T:p.A290V,Ugt1a5:NM_201643:exon2:c.C863T:p.A288V,Ugt1a9:NM_201644:exon2:c.C860T:p.A287V,Ugt1a1:NM_201645:exon2:c.C881T:p.A294V,Ugt1a6a:NM_145079:exon3:c.C869T:p.A290V,Ugt1a6b:NM_201410:exon3:c.C869T:p.A290V	1qD
chr1	88215088	88215088	T	G	exonic	Ugt1a1;Ugt1a10;Ugt1a2;Ugt1a5;Ugt1a6a;Ugt1a6b;Ugt1a7c;Ugt1a8;Ugt1a9	.	synonymous SNV	Ugt1a8:NM_001378375:exon2:c.T900G:p.V300V,Ugt1a2:NM_013701:exon2:c.T909G:p.V303V,Ugt1a10:NM_201641:exon2:c.T900G:p.V300V,Ugt1a7c:NM_201642:exon2:c.T903G:p.V301V,Ugt1a5:NM_201643:exon2:c.T897G:p.V299V,Ugt1a9:NM_201644:exon2:c.T894G:p.V298V,Ugt1a1:NM_201645:exon2:c.T915G:p.V305V,Ugt1a6a:NM_145079:exon3:c.T903G:p.V301V,Ugt1a6b:NM_201410:exon3:c.T903G:p.V301V	1qD
chr1	88215174	88215174	C	T	exonic	Ugt1a1;Ugt1a10;Ugt1a2;Ugt1a5;Ugt1a6a;Ugt1a6b;Ugt1a7c;Ugt1a8;Ugt1a9	.	nonsynonymous SNV	Ugt1a8:NM_001378375:exon2:c.C986T:p.T329M,Ugt1a2:NM_013701:exon2:c.C995T:p.T332M,Ugt1a10:NM_201641:exon2:c.C986T:p.T329M,Ugt1a7c:NM_201642:exon2:c.C989T:p.T330M,Ugt1a5:NM_201643:exon2:c.C983T:p.T328M,Ugt1a9:NM_201644:exon2:c.C980T:p.T327M,Ugt1a1:NM_201645:exon2:c.C1001T:p.T334M,Ugt1a6a:NM_145079:exon3:c.C989T:p.T330M,Ugt1a6b:NM_201410:exon3:c.C989T:p.T330M	1qD
chr1	88216213	88216213	C	T	exonic	Ugt1a1;Ugt1a10;Ugt1a2;Ugt1a5;Ugt1a6a;Ugt1a6b;Ugt1a7c;Ugt1a8;Ugt1a9	.	nonsynonymous SNV	Ugt1a8:NM_001378375:exon4:c.C1151T:p.P384L,Ugt1a2:NM_013701:exon4:c.C1160T:p.P387L,Ugt1a10:NM_201641:exon4:c.C1151T:p.P384L,Ugt1a7c:NM_201642:exon4:c.C1154T:p.P385L,Ugt1a5:NM_201643:exon4:c.C1148T:p.P383L,Ugt1a9:NM_201644:exon4:c.C1145T:p.P382L,Ugt1a1:NM_201645:exon4:c.C1166T:p.P389L,Ugt1a6a:NM_145079:exon5:c.C1154T:p.P385L,Ugt1a6b:NM_201410:exon5:c.C1154T:p.P385L	1qD
chr1	88216254	88216254	G	A	exonic	Ugt1a1;Ugt1a10;Ugt1a2;Ugt1a5;Ugt1a6a;Ugt1a6b;Ugt1a7c;Ugt1a8;Ugt1a9	.	nonsynonymous SNV	Ugt1a8:NM_001378375:exon4:c.G1192A:p.A398T,Ugt1a2:NM_013701:exon4:c.G1201A:p.A401T,Ugt1a10:NM_201641:exon4:c.G1192A:p.A398T,Ugt1a7c:NM_201642:exon4:c.G1195A:p.A399T,Ugt1a5:NM_201643:exon4:c.G1189A:p.A397T,Ugt1a9:NM_201644:exon4:c.G1186A:p.A396T,Ugt1a1:NM_201645:exon4:c.G1207A:p.A403T,Ugt1a6a:NM_145079:exon5:c.G1195A:p.A399T,Ugt1a6b:NM_201410:exon5:c.G1195A:p.A399T	1qD
chr1	88216261	88216261	G	A	exonic	Ugt1a1;Ugt1a10;Ugt1a2;Ugt1a5;Ugt1a6a;Ugt1a6b;Ugt1a7c;Ugt1a8;Ugt1a9	.	nonsynonymous SNV	Ugt1a8:NM_001378375:exon4:c.G1199A:p.R400H,Ugt1a2:NM_013701:exon4:c.G1208A:p.R403H,Ugt1a10:NM_201641:exon4:c.G1199A:p.R400H,Ugt1a7c:NM_201642:exon4:c.G1202A:p.R401H,Ugt1a5:NM_201643:exon4:c.G1196A:p.R399H,Ugt1a9:NM_201644:exon4:c.G1193A:p.R398H,Ugt1a1:NM_201645:exon4:c.G1214A:p.R405H,Ugt1a6a:NM_145079:exon5:c.G1202A:p.R401H,Ugt1a6b:NM_201410:exon5:c.G1202A:p.R401H	1qD
chr1	88216273	88216273	G	C	exonic	Ugt1a1;Ugt1a10;Ugt1a2;Ugt1a5;Ugt1a6a;Ugt1a6b;Ugt1a7c;Ugt1a8;Ugt1a9	.	nonsynonymous SNV	Ugt1a8:NM_001378375:exon4:c.G1211C:p.R404P,Ugt1a2:NM_013701:exon4:c.G1220C:p.R407P,Ugt1a10:NM_201641:exon4:c.G1211C:p.R404P,Ugt1a7c:NM_201642:exon4:c.G1214C:p.R405P,Ugt1a5:NM_201643:exon4:c.G1208C:p.R403P,Ugt1a9:NM_201644:exon4:c.G1205C:p.R402P,Ugt1a1:NM_201645:exon4:c.G1226C:p.R409P,Ugt1a6a:NM_145079:exon5:c.G1214C:p.R405P,Ugt1a6b:NM_201410:exon5:c.G1214C:p.R405P	1qD
chr1	88218146	88218146	C	A	exonic	Ugt1a1;Ugt1a10;Ugt1a2;Ugt1a5;Ugt1a6a;Ugt1a6b;Ugt1a7c;Ugt1a8;Ugt1a9	.	nonsynonymous SNV	Ugt1a8:NM_001378375:exon5:c.C1315A:p.R439S,Ugt1a2:NM_013701:exon5:c.C1324A:p.R442S,Ugt1a10:NM_201641:exon5:c.C1315A:p.R439S,Ugt1a7c:NM_201642:exon5:c.C1318A:p.R440S,Ugt1a5:NM_201643:exon5:c.C1312A:p.R438S,Ugt1a9:NM_201644:exon5:c.C1309A:p.R437S,Ugt1a1:NM_201645:exon5:c.C1330A:p.R444S,Ugt1a6a:NM_145079:exon6:c.C1318A:p.R440S,Ugt1a6b:NM_201410:exon6:c.C1318A:p.R440S	1qD
chr1	88218240	88218240	A	T	exonic	Ugt1a1;Ugt1a10;Ugt1a2;Ugt1a5;Ugt1a6a;Ugt1a6b;Ugt1a7c;Ugt1a8;Ugt1a9	.	nonsynonymous SNV	Ugt1a8:NM_001378375:exon5:c.A1409T:p.H470L,Ugt1a2:NM_013701:exon5:c.A1418T:p.H473L,Ugt1a10:NM_201641:exon5:c.A1409T:p.H470L,Ugt1a7c:NM_201642:exon5:c.A1412T:p.H471L,Ugt1a5:NM_201643:exon5:c.A1406T:p.H469L,Ugt1a9:NM_201644:exon5:c.A1403T:p.H468L,Ugt1a1:NM_201645:exon5:c.A1424T:p.H475L,Ugt1a6a:NM_145079:exon6:c.A1412T:p.H471L,Ugt1a6b:NM_201410:exon6:c.A1412T:p.H471L	1qD
chr1	88218245	88218245	C	T	exonic	Ugt1a1;Ugt1a10;Ugt1a2;Ugt1a5;Ugt1a6a;Ugt1a6b;Ugt1a7c;Ugt1a8;Ugt1a9	.	nonsynonymous SNV	Ugt1a8:NM_001378375:exon5:c.C1414T:p.R472C,Ugt1a2:NM_013701:exon5:c.C1423T:p.R475C,Ugt1a10:NM_201641:exon5:c.C1414T:p.R472C,Ugt1a7c:NM_201642:exon5:c.C1417T:p.R473C,Ugt1a5:NM_201643:exon5:c.C1411T:p.R471C,Ugt1a9:NM_201644:exon5:c.C1408T:p.R470C,Ugt1a1:NM_201645:exon5:c.C1429T:p.R477C,Ugt1a6a:NM_145079:exon6:c.C1417T:p.R473C,Ugt1a6b:NM_201410:exon6:c.C1417T:p.R473C	1qD
chr1	88218249	88218249	C	T	exonic	Ugt1a1;Ugt1a10;Ugt1a2;Ugt1a5;Ugt1a6a;Ugt1a6b;Ugt1a7c;Ugt1a8;Ugt1a9	.	nonsynonymous SNV	Ugt1a8:NM_001378375:exon5:c.C1418T:p.P473L,Ugt1a2:NM_013701:exon5:c.C1427T:p.P476L,Ugt1a10:NM_201641:exon5:c.C1418T:p.P473L,Ugt1a7c:NM_201642:exon5:c.C1421T:p.P474L,Ugt1a5:NM_201643:exon5:c.C1415T:p.P472L,Ugt1a9:NM_201644:exon5:c.C1412T:p.P471L,Ugt1a1:NM_201645:exon5:c.C1433T:p.P478L,Ugt1a6a:NM_145079:exon6:c.C1421T:p.P474L,Ugt1a6b:NM_201410:exon6:c.C1421T:p.P474L	1qD
chr1	88218279	88218279	A	T	exonic	Ugt1a1;Ugt1a10;Ugt1a2;Ugt1a5;Ugt1a6a;Ugt1a6b;Ugt1a7c;Ugt1a8;Ugt1a9	.	nonsynonymous SNV	Ugt1a8:NM_001378375:exon5:c.A1448T:p.Y483F,Ugt1a2:NM_013701:exon5:c.A1457T:p.Y486F,Ugt1a10:NM_201641:exon5:c.A1448T:p.Y483F,Ugt1a7c:NM_201642:exon5:c.A1451T:p.Y484F,Ugt1a5:NM_201643:exon5:c.A1445T:p.Y482F,Ugt1a9:NM_201644:exon5:c.A1442T:p.Y481F,Ugt1a1:NM_201645:exon5:c.A1463T:p.Y488F,Ugt1a6a:NM_145079:exon6:c.A1451T:p.Y484F,Ugt1a6b:NM_201410:exon6:c.A1451T:p.Y484F	1qD
chr1	88218283	88218283	C	G	exonic	Ugt1a1;Ugt1a10;Ugt1a2;Ugt1a5;Ugt1a6a;Ugt1a6b;Ugt1a7c;Ugt1a8;Ugt1a9	.	nonsynonymous SNV	Ugt1a8:NM_001378375:exon5:c.C1452G:p.H484Q,Ugt1a2:NM_013701:exon5:c.C1461G:p.H487Q,Ugt1a10:NM_201641:exon5:c.C1452G:p.H484Q,Ugt1a7c:NM_201642:exon5:c.C1455G:p.H485Q,Ugt1a5:NM_201643:exon5:c.C1449G:p.H483Q,Ugt1a9:NM_201644:exon5:c.C1446G:p.H482Q,Ugt1a1:NM_201645:exon5:c.C1467G:p.H489Q,Ugt1a6a:NM_145079:exon6:c.C1455G:p.H485Q,Ugt1a6b:NM_201410:exon6:c.C1455G:p.H485Q	1qD
chr1	88218360	88218360	G	A	exonic	Ugt1a1;Ugt1a10;Ugt1a2;Ugt1a5;Ugt1a6a;Ugt1a6b;Ugt1a7c;Ugt1a8;Ugt1a9	.	nonsynonymous SNV	Ugt1a8:NM_001378375:exon5:c.G1529A:p.G510D,Ugt1a2:NM_013701:exon5:c.G1538A:p.G513D,Ugt1a10:NM_201641:exon5:c.G1529A:p.G510D,Ugt1a7c:NM_201642:exon5:c.G1532A:p.G511D,Ugt1a5:NM_201643:exon5:c.G1526A:p.G509D,Ugt1a9:NM_201644:exon5:c.G1523A:p.G508D,Ugt1a1:NM_201645:exon5:c.G1544A:p.G515D,Ugt1a6a:NM_145079:exon6:c.G1532A:p.G511D,Ugt1a6b:NM_201410:exon6:c.G1532A:p.G511D	1qD
chr1	88218388	88218388	G	A	exonic	Ugt1a1;Ugt1a10;Ugt1a2;Ugt1a5;Ugt1a6a;Ugt1a6b;Ugt1a7c;Ugt1a8;Ugt1a9	.	synonymous SNV	Ugt1a8:NM_001378375:exon5:c.G1557A:p.G519G,Ugt1a2:NM_013701:exon5:c.G1566A:p.G522G,Ugt1a10:NM_201641:exon5:c.G1557A:p.G519G,Ugt1a7c:NM_201642:exon5:c.G1560A:p.G520G,Ugt1a5:NM_201643:exon5:c.G1554A:p.G518G,Ugt1a9:NM_201644:exon5:c.G1551A:p.G517G,Ugt1a1:NM_201645:exon5:c.G1572A:p.G524G,Ugt1a6a:NM_145079:exon6:c.G1560A:p.G520G,Ugt1a6b:NM_201410:exon6:c.G1560A:p.G520G	1qD
chr1	88218390	88218390	G	A	exonic	Ugt1a1;Ugt1a10;Ugt1a2;Ugt1a5;Ugt1a6a;Ugt1a6b;Ugt1a7c;Ugt1a8;Ugt1a9	.	nonsynonymous SNV	Ugt1a8:NM_001378375:exon5:c.G1559A:p.R520Q,Ugt1a2:NM_013701:exon5:c.G1568A:p.R523Q,Ugt1a10:NM_201641:exon5:c.G1559A:p.R520Q,Ugt1a7c:NM_201642:exon5:c.G1562A:p.R521Q,Ugt1a5:NM_201643:exon5:c.G1556A:p.R519Q,Ugt1a9:NM_201644:exon5:c.G1553A:p.R518Q,Ugt1a1:NM_201645:exon5:c.G1574A:p.R525Q,Ugt1a6a:NM_145079:exon6:c.G1562A:p.R521Q,Ugt1a6b:NM_201410:exon6:c.G1562A:p.R521Q	1qD
chr1	88228343	88228343	G	A	exonic	Mroh2a	.	nonsynonymous SNV	Mroh2a:NM_001281466:exon3:c.G196A:p.E66K	1qD
chr1	88228380	88228380	C	A	exonic	Mroh2a	.	nonsynonymous SNV	Mroh2a:NM_001281466:exon3:c.C233A:p.A78E	1qD
chr1	88230368	88230368	C	A	exonic	Mroh2a	.	synonymous SNV	Mroh2a:NM_001281466:exon4:c.C288A:p.I96I	1qD
chr1	88230637	88230637	T	C	exonic	Mroh2a	.	synonymous SNV	Mroh2a:NM_001281466:exon5:c.T405C:p.F135F	1qD
chr1	88230644	88230644	G	A	exonic	Mroh2a	.	nonsynonymous SNV	Mroh2a:NM_001281466:exon5:c.G412A:p.A138T	1qD
chr1	88230650	88230650	G	A	exonic	Mroh2a	.	nonsynonymous SNV	Mroh2a:NM_001281466:exon5:c.G418A:p.V140M	1qD
chr1	88230667	88230667	A	C	exonic	Mroh2a	.	synonymous SNV	Mroh2a:NM_001281466:exon5:c.A435C:p.L145L	1qD
chr1	88230668	88230668	G	A	exonic	Mroh2a	.	nonsynonymous SNV	Mroh2a:NM_001281466:exon5:c.G436A:p.V146M	1qD
chr1	88230680	88230680	C	T	exonic	Mroh2a	.	stopgain	Mroh2a:NM_001281466:exon5:c.C448T:p.R150X	1qD
chr1	88230746	88230746	G	A	exonic	Mroh2a	.	nonsynonymous SNV	Mroh2a:NM_001281466:exon5:c.G514A:p.E172K	1qD
chr1	88232292	88232292	C	T	exonic	Mroh2a	.	nonsynonymous SNV	Mroh2a:NM_001281466:exon6:c.C605T:p.T202M	1qD
chr1	88232324	88232324	C	T	exonic	Mroh2a	.	nonsynonymous SNV	Mroh2a:NM_001281466:exon6:c.C637T:p.R213C	1qD
chr1	88233327	88233327	G	A	exonic	Mroh2a	.	synonymous SNV	Mroh2a:NM_001281466:exon7:c.G666A:p.T222T	1qD
chr1	88233330	88233330	C	T	exonic	Mroh2a	.	synonymous SNV	Mroh2a:NM_001281466:exon7:c.C669T:p.F223F	1qD
chr1	88233340	88233340	G	A	exonic	Mroh2a	.	nonsynonymous SNV	Mroh2a:NM_001281466:exon7:c.G679A:p.V227M	1qD
chr1	88233390	88233390	G	A	exonic	Mroh2a	.	synonymous SNV	Mroh2a:NM_001281466:exon7:c.G729A:p.T243T	1qD
chr1	88233393	88233393	G	A	exonic	Mroh2a	.	synonymous SNV	Mroh2a:NM_001281466:exon7:c.G732A:p.E244E	1qD
chr1	88233417	88233417	C	T	exonic	Mroh2a	.	synonymous SNV	Mroh2a:NM_001281466:exon7:c.C756T:p.F252F	1qD
chr1	88233428	88233428	G	A	exonic	Mroh2a	.	nonsynonymous SNV	Mroh2a:NM_001281466:exon7:c.G767A:p.R256Q	1qD
chr1	88233435	88233435	C	T	exonic	Mroh2a	.	synonymous SNV	Mroh2a:NM_001281466:exon7:c.C774T:p.F258F	1qD
chr1	88233442	88233442	G	T	exonic	Mroh2a	.	nonsynonymous SNV	Mroh2a:NM_001281466:exon7:c.G781T:p.V261L	1qD
chr1	88234040	88234040	G	C	exonic	Mroh2a	.	synonymous SNV	Mroh2a:NM_001281466:exon8:c.G846C:p.L282L	1qD
chr1	88234120	88234120	G	A	exonic	Mroh2a	.	nonsynonymous SNV	Mroh2a:NM_001281466:exon8:c.G926A:p.G309D	1qD
chr1	88234137	88234137	G	A	exonic	Mroh2a	.	nonsynonymous SNV	Mroh2a:NM_001281466:exon8:c.G943A:p.V315I	1qD
chr1	88234981	88234981	G	A	exonic	Mroh2a	.	synonymous SNV	Mroh2a:NM_001281466:exon9:c.G963A:p.Q321Q	1qD
chr1	88234996	88234996	G	A	exonic	Mroh2a	.	synonymous SNV	Mroh2a:NM_001281466:exon9:c.G978A:p.S326S	1qD
chr1	88235023	88235023	G	A	exonic	Mroh2a	.	synonymous SNV	Mroh2a:NM_001281466:exon9:c.G1005A:p.P335P	1qD
chr1	88235051	88235051	T	C	exonic	Mroh2a	.	synonymous SNV	Mroh2a:NM_001281466:exon9:c.T1033C:p.L345L	1qD
chr1	88235214	88235214	C	T	exonic	Mroh2a	.	stopgain	Mroh2a:NM_001281466:exon10:c.C1069T:p.Q357X	1qD
chr1	88235254	88235254	G	A	exonic	Mroh2a	.	nonsynonymous SNV	Mroh2a:NM_001281466:exon10:c.G1109A:p.C370Y	1qD
chr1	88235442	88235442	G	A	exonic	Mroh2a	.	nonsynonymous SNV	Mroh2a:NM_001281466:exon11:c.G1193A:p.R398H	1qD
chr1	88236665	88236665	T	G	exonic	Mroh2a	.	nonsynonymous SNV	Mroh2a:NM_001281466:exon12:c.T1248G:p.I416M	1qD
chr1	88236695	88236695	C	G	exonic	Mroh2a	.	synonymous SNV	Mroh2a:NM_001281466:exon12:c.C1278G:p.R426R	1qD
chr1	88237491	88237491	C	T	exonic	Mroh2a	.	stopgain	Mroh2a:NM_001281466:exon13:c.C1333T:p.R445X	1qD
chr1	88237541	88237541	C	A	exonic	Mroh2a	.	synonymous SNV	Mroh2a:NM_001281466:exon13:c.C1383A:p.G461G	1qD
chr1	88237852	88237852	G	T	exonic	Mroh2a	.	nonsynonymous SNV	Mroh2a:NM_001281466:exon14:c.G1442T:p.R481L	1qD
chr1	88237853	88237853	A	C	exonic	Mroh2a	.	synonymous SNV	Mroh2a:NM_001281466:exon14:c.A1443C:p.R481R	1qD
chr1	88237944	88237944	G	A	exonic	Mroh2a	.	nonsynonymous SNV	Mroh2a:NM_001281466:exon14:c.G1534A:p.G512S	1qD
chr1	88238947	88238947	A	G	exonic	Mroh2a	.	synonymous SNV	Mroh2a:NM_001281466:exon15:c.A1599G:p.A533A	1qD
chr1	88238983	88238983	C	T	exonic	Mroh2a	.	synonymous SNV	Mroh2a:NM_001281466:exon15:c.C1635T:p.A545A	1qD
chr1	88239006	88239006	A	C	exonic	Mroh2a	.	nonsynonymous SNV	Mroh2a:NM_001281466:exon15:c.A1658C:p.D553A	1qD
chr1	88240124	88240124	T	C	exonic	Mroh2a	.	synonymous SNV	Mroh2a:NM_001281466:exon16:c.T1699C:p.L567L	1qD
chr1	88240149	88240149	C	T	exonic	Mroh2a	.	nonsynonymous SNV	Mroh2a:NM_001281466:exon16:c.C1724T:p.A575V	1qD
chr1	88240703	88240703	G	A	exonic	Mroh2a	.	nonsynonymous SNV	Mroh2a:NM_001281466:exon17:c.G1759A:p.G587R	1qD
chr1	88240709	88240709	G	T	exonic	Mroh2a	.	nonsynonymous SNV	Mroh2a:NM_001281466:exon17:c.G1765T:p.G589C	1qD
chr1	88240802	88240802	C	T	exonic	Mroh2a	.	synonymous SNV	Mroh2a:NM_001281466:exon17:c.C1858T:p.L620L	1qD
chr1	88241093	88241093	C	T	exonic	Mroh2a	.	synonymous SNV	Mroh2a:NM_001281466:exon18:c.C1899T:p.N633N	1qD
chr1	88241584	88241584	G	A	exonic	Mroh2a	.	stopgain	Mroh2a:NM_001281466:exon19:c.G1971A:p.W657X	1qD
chr1	88241590	88241590	A	G	exonic	Mroh2a	.	synonymous SNV	Mroh2a:NM_001281466:exon19:c.A1977G:p.L659L	1qD
chr1	88241618	88241618	A	C	exonic	Mroh2a	.	nonsynonymous SNV	Mroh2a:NM_001281466:exon19:c.A2005C:p.I669L	1qD
chr1	88242417	88242417	G	T	exonic	Mroh2a	.	nonsynonymous SNV	Mroh2a:NM_001281466:exon20:c.G2051T:p.R684M	1qD
chr1	88242418	88242418	G	T	exonic	Mroh2a	.	nonsynonymous SNV	Mroh2a:NM_001281466:exon20:c.G2052T:p.R684S	1qD
chr1	88242420	88242420	C	A	exonic	Mroh2a	.	nonsynonymous SNV	Mroh2a:NM_001281466:exon20:c.C2054A:p.A685D	1qD
chr1	88242421	88242421	C	A	exonic	Mroh2a	.	synonymous SNV	Mroh2a:NM_001281466:exon20:c.C2055A:p.A685A	1qD
chr1	88242508	88242508	T	C	exonic	Mroh2a	.	synonymous SNV	Mroh2a:NM_001281466:exon20:c.T2142C:p.N714N	1qD
chr1	88242511	88242511	T	C	exonic	Mroh2a	.	synonymous SNV	Mroh2a:NM_001281466:exon20:c.T2145C:p.D715D	1qD
chr1	88242760	88242760	C	T	exonic	Mroh2a	.	nonsynonymous SNV	Mroh2a:NM_001281466:exon21:c.C2249T:p.S750L	1qD
chr1	88242764	88242764	A	G	exonic	Mroh2a	.	synonymous SNV	Mroh2a:NM_001281466:exon21:c.A2253G:p.E751E	1qD
chr1	88242779	88242779	C	T	exonic	Mroh2a	.	synonymous SNV	Mroh2a:NM_001281466:exon21:c.C2268T:p.I756I	1qD
chr1	88243950	88243950	G	A	exonic	Mroh2a	.	nonsynonymous SNV	Mroh2a:NM_001281466:exon22:c.G2300A:p.R767Q	1qD
chr1	88244002	88244002	C	T	exonic	Mroh2a	.	synonymous SNV	Mroh2a:NM_001281466:exon22:c.C2352T:p.Y784Y	1qD
chr1	88244014	88244014	G	A	exonic	Mroh2a	.	synonymous SNV	Mroh2a:NM_001281466:exon22:c.G2364A:p.Q788Q	1qD
chr1	88244083	88244083	G	A	exonic	Mroh2a	.	synonymous SNV	Mroh2a:NM_001281466:exon22:c.G2433A:p.Q811Q	1qD
chr1	88244970	88244970	G	T	exonic	Mroh2a	.	nonsynonymous SNV	Mroh2a:NM_001281466:exon23:c.G2460T:p.M820I	1qD
chr1	88244995	88244995	G	T	exonic	Mroh2a	.	nonsynonymous SNV	Mroh2a:NM_001281466:exon23:c.G2485T:p.A829S	1qD
chr1	88245989	88245989	T	C	exonic	Mroh2a	.	nonsynonymous SNV	Mroh2a:NM_001281466:exon24:c.T2558C:p.V853A	1qD
chr1	88246017	88246017	C	T	exonic	Mroh2a	.	synonymous SNV	Mroh2a:NM_001281466:exon24:c.C2586T:p.H862H	1qD
chr1	88246042	88246042	G	C	exonic	Mroh2a	.	nonsynonymous SNV	Mroh2a:NM_001281466:exon24:c.G2611C:p.A871P	1qD
chr1	88246065	88246065	A	G	exonic	Mroh2a	.	synonymous SNV	Mroh2a:NM_001281466:exon24:c.A2634G:p.L878L	1qD
chr1	88247139	88247139	G	A	exonic	Mroh2a	.	synonymous SNV	Mroh2a:NM_001281466:exon25:c.G2640A:p.T880T	1qD
chr1	88247140	88247140	A	C	exonic	Mroh2a	.	nonsynonymous SNV	Mroh2a:NM_001281466:exon25:c.A2641C:p.M881L	1qD
chr1	88247232	88247232	T	C	exonic	Mroh2a	.	synonymous SNV	Mroh2a:NM_001281466:exon25:c.T2733C:p.N911N	1qD
chr1	88247237	88247237	C	T	exonic	Mroh2a	.	nonsynonymous SNV	Mroh2a:NM_001281466:exon25:c.C2738T:p.S913F	1qD
chr1	88247763	88247763	A	G	exonic	Mroh2a	.	nonsynonymous SNV	Mroh2a:NM_001281466:exon26:c.A2761G:p.T921A	1qD
chr1	88248555	88248555	C	A	exonic	Mroh2a	.	nonsynonymous SNV	Mroh2a:NM_001281466:exon27:c.C2845A:p.L949M	1qD
chr1	88248584	88248584	G	A	exonic	Mroh2a	.	synonymous SNV	Mroh2a:NM_001281466:exon27:c.G2874A:p.E958E	1qD
chr1	88248586	88248586	G	A	exonic	Mroh2a	.	stopgain	Mroh2a:NM_001281466:exon27:c.G2876A:p.W959X	1qD
chr1	88248614	88248614	T	C	exonic	Mroh2a	.	synonymous SNV	Mroh2a:NM_001281466:exon27:c.T2904C:p.H968H	1qD
chr1	88248621	88248621	C	T	exonic	Mroh2a	.	nonsynonymous SNV	Mroh2a:NM_001281466:exon27:c.C2911T:p.L971F	1qD
chr1	88250266	88250266	A	G	exonic	Mroh2a	.	synonymous SNV	Mroh2a:NM_001281466:exon29:c.A3072G:p.V1024V	1qD
chr1	88250268	88250268	G	A	exonic	Mroh2a	.	nonsynonymous SNV	Mroh2a:NM_001281466:exon29:c.G3074A:p.S1025N	1qD
chr1	88250342	88250342	G	A	exonic	Mroh2a	.	nonsynonymous SNV	Mroh2a:NM_001281466:exon29:c.G3148A:p.D1050N	1qD
chr1	88251267	88251267	G	T	exonic	Mroh2a	.	nonsynonymous SNV	Mroh2a:NM_001281466:exon30:c.G3212T:p.C1071F	1qD
chr1	88251346	88251346	C	T	exonic	Mroh2a	.	synonymous SNV	Mroh2a:NM_001281466:exon30:c.C3291T:p.V1097V	1qD
chr1	88251365	88251365	C	T	exonic	Mroh2a	.	nonsynonymous SNV	Mroh2a:NM_001281466:exon30:c.C3310T:p.L1104F	1qD
chr1	88251374	88251374	C	T	exonic	Mroh2a	.	nonsynonymous SNV	Mroh2a:NM_001281466:exon30:c.C3319T:p.R1107W	1qD
chr1	88251385	88251385	G	T	exonic	Mroh2a	.	nonsynonymous SNV	Mroh2a:NM_001281466:exon30:c.G3330T:p.E1110D	1qD
chr1	88252383	88252383	T	C	exonic	Mroh2a	.	synonymous SNV	Mroh2a:NM_001281466:exon31:c.T3390C:p.D1130D	1qD
chr1	88252401	88252401	A	G	exonic	Mroh2a	.	synonymous SNV	Mroh2a:NM_001281466:exon31:c.A3408G:p.R1136R	1qD
chr1	88252457	88252457	C	T	exonic	Mroh2a	.	nonsynonymous SNV	Mroh2a:NM_001281466:exon31:c.C3464T:p.T1155I	1qD
chr1	88252458	88252458	A	G	exonic	Mroh2a	.	synonymous SNV	Mroh2a:NM_001281466:exon31:c.A3465G:p.T1155T	1qD
chr1	88252477	88252477	C	T	exonic	Mroh2a	.	synonymous SNV	Mroh2a:NM_001281466:exon31:c.C3484T:p.L1162L	1qD
chr1	88254906	88254906	A	C	exonic	Mroh2a	.	synonymous SNV	Mroh2a:NM_001281466:exon32:c.A3546C:p.A1182A	1qD
chr1	88254948	88254948	G	A	exonic	Mroh2a	.	synonymous SNV	Mroh2a:NM_001281466:exon32:c.G3588A:p.R1196R	1qD
chr1	88254965	88254965	A	T	exonic	Mroh2a	.	nonsynonymous SNV	Mroh2a:NM_001281466:exon32:c.A3605T:p.N1202I	1qD
chr1	88255245	88255245	T	C	exonic	Mroh2a	.	synonymous SNV	Mroh2a:NM_001281466:exon33:c.T3813C:p.V1271V	1qD
chr1	88255275	88255275	C	T	exonic	Mroh2a	.	synonymous SNV	Mroh2a:NM_001281466:exon33:c.C3843T:p.T1281T	1qD
chr1	88255565	88255565	C	A	exonic	Mroh2a	.	nonsynonymous SNV	Mroh2a:NM_001281466:exon34:c.C3874A:p.L1292I	1qD
chr1	88255607	88255607	T	C	exonic	Mroh2a	.	synonymous SNV	Mroh2a:NM_001281466:exon34:c.T3916C:p.L1306L	1qD
chr1	88256090	88256090	G	A	exonic	Mroh2a	.	synonymous SNV	Mroh2a:NM_001281466:exon35:c.G4023A:p.Q1341Q	1qD
chr1	88256096	88256096	G	A	exonic	Mroh2a	.	synonymous SNV	Mroh2a:NM_001281466:exon35:c.G4029A:p.L1343L	1qD
chr1	88256155	88256155	C	T	exonic	Mroh2a	.	nonsynonymous SNV	Mroh2a:NM_001281466:exon35:c.C4088T:p.T1363M	1qD
chr1	88256413	88256413	C	T	exonic	Mroh2a	.	nonsynonymous SNV	Mroh2a:NM_001281466:exon36:c.C4118T:p.P1373L	1qD
chr1	88256468	88256468	T	C	exonic	Mroh2a	.	synonymous SNV	Mroh2a:NM_001281466:exon36:c.T4173C:p.G1391G	1qD
chr1	88256545	88256545	G	A	exonic	Mroh2a	.	nonsynonymous SNV	Mroh2a:NM_001281466:exon36:c.G4250A:p.R1417Q	1qD
chr1	88256705	88256705	C	T	exonic	Mroh2a	.	stopgain	Mroh2a:NM_001281466:exon37:c.C4309T:p.Q1437X	1qD
chr1	88256727	88256727	C	T	exonic	Mroh2a	.	nonsynonymous SNV	Mroh2a:NM_001281466:exon37:c.C4331T:p.A1444V	1qD
chr1	88256798	88256798	G	A	exonic	Mroh2a	.	nonsynonymous SNV	Mroh2a:NM_001281466:exon37:c.G4402A:p.A1468T	1qD
chr1	88257739	88257739	T	C	exonic	Mroh2a	.	synonymous SNV	Mroh2a:NM_001281466:exon38:c.T4467C:p.F1489F	1qD
chr1	88258633	88258633	C	T	exonic	Mroh2a	.	synonymous SNV	Mroh2a:NM_001281466:exon39:c.C4644T:p.S1548S	1qD
chr1	88258708	88258708	C	T	exonic	Mroh2a	.	synonymous SNV	Mroh2a:NM_001281466:exon39:c.C4719T:p.S1573S	1qD
chr1	88259567	88259567	A	G	exonic	Mroh2a	.	synonymous SNV	Mroh2a:NM_001281466:exon41:c.A4866G:p.K1622K	1qD
chr1	88259973	88259973	C	T	exonic	Mroh2a	.	synonymous SNV	Mroh2a:NM_001281466:exon42:c.C4963T:p.L1655L	1qD
chr1	88260002	88260002	A	C	exonic	Mroh2a	.	nonsynonymous SNV	Mroh2a:NM_001281466:exon42:c.A4992C:p.L1664F	1qD
chr1	88260002	88260002	A	G	exonic	Mroh2a	.	synonymous SNV	Mroh2a:NM_001281466:exon42:c.A4992G:p.L1664L	1qD
chr1	88260003	88260003	G	T	exonic	Mroh2a	.	nonsynonymous SNV	Mroh2a:NM_001281466:exon42:c.G4993T:p.A1665S	1qD
chr1	88260004	88260004	C	T	exonic	Mroh2a	.	nonsynonymous SNV	Mroh2a:NM_001281466:exon42:c.C4994T:p.A1665V	1qD
chr1	88260005	88260005	G	A	exonic	Mroh2a	.	synonymous SNV	Mroh2a:NM_001281466:exon42:c.G4995A:p.A1665A	1qD
chr1	88265185	88265185	G	A	exonic	A730008H23Rik;Hjurp	.	nonsynonymous SNV	A730008H23Rik:NM_172505:exon5:c.C1772T:p.P591L,Hjurp:NM_198652:exon8:c.C2000T:p.P667L	1qD
chr1	88265210	88265210	C	T	exonic	A730008H23Rik;Hjurp	.	nonsynonymous SNV	A730008H23Rik:NM_172505:exon5:c.G1747A:p.D583N,Hjurp:NM_198652:exon8:c.G1975A:p.D659N	1qD
chr1	88265215	88265215	A	G	exonic	A730008H23Rik;Hjurp	.	nonsynonymous SNV	A730008H23Rik:NM_172505:exon5:c.T1742C:p.F581S,Hjurp:NM_198652:exon8:c.T1970C:p.F657S	1qD
chr1	88265217	88265217	C	T	exonic	A730008H23Rik;Hjurp	.	synonymous SNV	A730008H23Rik:NM_172505:exon5:c.G1740A:p.K580K,Hjurp:NM_198652:exon8:c.G1968A:p.K656K	1qD
chr1	88265258	88265258	A	G	exonic	A730008H23Rik;Hjurp	.	nonsynonymous SNV	A730008H23Rik:NM_172505:exon5:c.T1699C:p.C567R,Hjurp:NM_198652:exon8:c.T1927C:p.C643R	1qD
chr1	88265271	88265271	C	A	exonic	A730008H23Rik;Hjurp	.	synonymous SNV	A730008H23Rik:NM_172505:exon5:c.G1686T:p.L562L,Hjurp:NM_198652:exon8:c.G1914T:p.L638L	1qD
chr1	88265279	88265279	A	G	exonic	A730008H23Rik;Hjurp	.	nonsynonymous SNV	A730008H23Rik:NM_172505:exon5:c.T1678C:p.S560P,Hjurp:NM_198652:exon8:c.T1906C:p.S636P	1qD
chr1	88265280	88265280	G	C	exonic	A730008H23Rik;Hjurp	.	nonsynonymous SNV	A730008H23Rik:NM_172505:exon5:c.C1677G:p.D559E,Hjurp:NM_198652:exon8:c.C1905G:p.D635E	1qD
chr1	88265309	88265309	C	G	exonic	A730008H23Rik;Hjurp	.	nonsynonymous SNV	A730008H23Rik:NM_172505:exon5:c.G1648C:p.A550P,Hjurp:NM_198652:exon8:c.G1876C:p.A626P	1qD
chr1	88265472	88265472	C	T	exonic	A730008H23Rik;Hjurp	.	synonymous SNV	A730008H23Rik:NM_172505:exon5:c.G1485A:p.A495A,Hjurp:NM_198652:exon8:c.G1713A:p.A571A	1qD
chr1	88265570	88265570	T	A	exonic	A730008H23Rik;Hjurp	.	nonsynonymous SNV	A730008H23Rik:NM_172505:exon5:c.A1387T:p.S463C,Hjurp:NM_198652:exon8:c.A1615T:p.S539C	1qD
chr1	88265673	88265673	C	A	exonic	A730008H23Rik;Hjurp	.	synonymous SNV	A730008H23Rik:NM_172505:exon5:c.G1284T:p.P428P,Hjurp:NM_198652:exon8:c.G1512T:p.P504P	1qD
chr1	88265846	88265846	A	C	exonic	A730008H23Rik;Hjurp	.	nonsynonymous SNV	A730008H23Rik:NM_172505:exon5:c.T1111G:p.S371A,Hjurp:NM_198652:exon8:c.T1339G:p.S447A	1qD
chr1	88265980	88265980	T	G	exonic	A730008H23Rik;Hjurp	.	nonsynonymous SNV	A730008H23Rik:NM_172505:exon5:c.A977C:p.Q326P,Hjurp:NM_198652:exon8:c.A1205C:p.Q402P	1qD
chr1	88266121	88266121	G	A	exonic	A730008H23Rik;Hjurp	.	nonsynonymous SNV	A730008H23Rik:NM_172505:exon5:c.C836T:p.S279F,Hjurp:NM_198652:exon8:c.C1064T:p.S355F	1qD
chr1	88266195	88266195	G	A	exonic	A730008H23Rik;Hjurp	.	synonymous SNV	A730008H23Rik:NM_172505:exon5:c.C762T:p.H254H,Hjurp:NM_198652:exon8:c.C990T:p.H330H	1qD
chr1	88266241	88266241	G	T	exonic	A730008H23Rik;Hjurp	.	nonsynonymous SNV	A730008H23Rik:NM_172505:exon5:c.C716A:p.P239H,Hjurp:NM_198652:exon8:c.C944A:p.P315H	1qD
chr1	88266400	88266400	G	A	exonic	A730008H23Rik;Hjurp	.	nonsynonymous SNV	A730008H23Rik:NM_172505:exon5:c.C557T:p.P186L,Hjurp:NM_198652:exon8:c.C785T:p.P262L	1qD
chr1	88266452	88266452	C	T	exonic	A730008H23Rik;Hjurp	.	nonsynonymous SNV	A730008H23Rik:NM_172505:exon5:c.G505A:p.D169N,Hjurp:NM_198652:exon8:c.G733A:p.D245N	1qD
chr1	88266561	88266561	A	G	exonic	A730008H23Rik;Hjurp	.	synonymous SNV	A730008H23Rik:NM_172505:exon5:c.T396C:p.D132D,Hjurp:NM_198652:exon8:c.T624C:p.D208D	1qD
chr1	88266616	88266616	T	C	exonic	A730008H23Rik;Hjurp	.	nonsynonymous SNV	A730008H23Rik:NM_172505:exon5:c.A341G:p.E114G,Hjurp:NM_198652:exon8:c.A569G:p.E190G	1qD
chr1	88269331	88269331	T	C	exonic	Hjurp	.	nonsynonymous SNV	Hjurp:NM_198652:exon6:c.A437G:p.E146G	1qD
chr1	88270269	88270269	A	G	exonic	Hjurp	.	nonsynonymous SNV	Hjurp:NM_198652:exon5:c.T287C:p.L96S	1qD
chr1	88270274	88270274	C	T	exonic	Hjurp	.	synonymous SNV	Hjurp:NM_198652:exon5:c.G282A:p.T94T	1qD
chr1	88272730	88272730	A	G	exonic	Hjurp	.	synonymous SNV	Hjurp:NM_198652:exon4:c.T255C:p.G85G	1qD
chr1	88277238	88277238	T	C	exonic	A730008H23Rik;Hjurp	.	synonymous SNV	A730008H23Rik:NM_172505:exon2:c.A144G:p.L48L,Hjurp:NM_198652:exon2:c.A144G:p.L48L	1qD
chr1	88277245	88277245	C	G	exonic	A730008H23Rik;Hjurp	.	nonsynonymous SNV	A730008H23Rik:NM_172505:exon2:c.G137C:p.R46T,Hjurp:NM_198652:exon2:c.G137C:p.R46T	1qD
chr1	88277410	88277410	G	A	exonic	A730008H23Rik;Hjurp	.	synonymous SNV	A730008H23Rik:NM_172505:exon1:c.C60T:p.S20S,Hjurp:NM_198652:exon1:c.C60T:p.S20S	1qD
chr1	88277413	88277413	A	T	exonic	A730008H23Rik;Hjurp	.	nonsynonymous SNV	A730008H23Rik:NM_172505:exon1:c.T57A:p.S19R,Hjurp:NM_198652:exon1:c.T57A:p.S19R	1qD
chr1	88277422	88277422	C	A	exonic	A730008H23Rik;Hjurp	.	nonsynonymous SNV	A730008H23Rik:NM_172505:exon1:c.G48T:p.K16N,Hjurp:NM_198652:exon1:c.G48T:p.K16N	1qD
chr1	88277434	88277434	A	C	exonic	A730008H23Rik;Hjurp	.	nonsynonymous SNV	A730008H23Rik:NM_172505:exon1:c.T36G:p.H12Q,Hjurp:NM_198652:exon1:c.T36G:p.H12Q	1qD
chr1	88277442	88277442	T	A	exonic	A730008H23Rik;Hjurp	.	nonsynonymous SNV	A730008H23Rik:NM_172505:exon1:c.A28T:p.R10W,Hjurp:NM_198652:exon1:c.A28T:p.R10W	1qD
chr1	92857326	92857326	G	C	exonic	Gpc1	.	nonsynonymous SNV	Gpc1:NM_016696:exon6:c.G1090C:p.A364P	1qD
chr1	164134000	164134000	G	T	exonic	Selp	.	synonymous SNV	Selp:NM_011347:exon8:c.G1281T:p.V427V	1qH2.2
chr1	164279998	164279998	C	A	exonic	Ccdc181	.	nonsynonymous SNV	Ccdc181:NM_029115:exon3:c.C249A:p.F83L	1qH2.2
chr1	171356715	171356715	G	C	exonic	Pfdn2	.	nonsynonymous SNV	Pfdn2:NM_001360824:exon3:c.G175C:p.D59H,Pfdn2:NM_001360825:exon3:c.G31C:p.D11H,Pfdn2:NM_011070:exon3:c.G175C:p.D59H	1qH3
chr1	171357963	171357963	A	G	exonic	Pfdn2	.	synonymous SNV	Pfdn2:NM_001360825:exon4:c.A258G:p.A86A,Pfdn2:NM_011070:exon4:c.A402G:p.A134A	1qH3
chr1	175984539	175984539	G	A	exonic	Pld5	.	synonymous SNV	Pld5:NM_001357846:exon6:c.C354T:p.I118I,Pld5:NM_001357847:exon6:c.C354T:p.I118I,Pld5:NM_001195816:exon7:c.C792T:p.I264I,Pld5:NM_001357844:exon7:c.C702T:p.I234I,Pld5:NM_001357845:exon7:c.C702T:p.I234I,Pld5:NM_176916:exon7:c.C978T:p.I326I	1qH4
chr1	180937197	180937197	G	C	exonic	Lefty1	.	nonsynonymous SNV	Lefty1:NM_010094:exon3:c.G686C:p.G229A	1qH4
chr1	183135564	183135564	G	C	exonic	Disp1	.	nonsynonymous SNV	Disp1:NM_001278220:exon2:c.C297G:p.C99W,Disp1:NM_001278218:exon3:c.C297G:p.C99W,Disp1:NM_001278219:exon3:c.C297G:p.C99W,Disp1:NM_026866:exon4:c.C297G:p.C99W	1qH5
chr1	188850064	188850064	G	C	exonic	Ush2a	.	nonsynonymous SNV	Ush2a:NM_021408:exon57:c.G11323C:p.V3775L	1qH6
chr1	188864592	188864592	G	A	exonic	Ush2a	.	nonsynonymous SNV	Ush2a:NM_021408:exon59:c.G11528A:p.G3843D	1qH6
chr1	188864618	188864618	G	A	exonic	Ush2a	.	nonsynonymous SNV	Ush2a:NM_021408:exon59:c.G11554A:p.V3852I	1qH6
chr1	188911284	188911284	G	A	exonic	Ush2a	.	nonsynonymous SNV	Ush2a:NM_021408:exon62:c.G12842A:p.R4281Q	1qH6
chr1	188911297	188911297	T	C	exonic	Ush2a	.	synonymous SNV	Ush2a:NM_021408:exon62:c.T12855C:p.G4285G	1qH6
chr1	188911479	188911479	T	C	exonic	Ush2a	.	nonsynonymous SNV	Ush2a:NM_021408:exon62:c.T13037C:p.V4346A	1qH6
chr1	188911520	188911520	A	G	exonic	Ush2a	.	nonsynonymous SNV	Ush2a:NM_021408:exon62:c.A13078G:p.S4360G	1qH6
chr1	188911726	188911726	C	T	exonic	Ush2a	.	synonymous SNV	Ush2a:NM_021408:exon62:c.C13284T:p.S4428S	1qH6
chr1	188912068	188912068	T	A	exonic	Ush2a	.	synonymous SNV	Ush2a:NM_021408:exon62:c.T13626A:p.A4542A	1qH6
chr1	188912180	188912180	T	A	exonic	Ush2a	.	nonsynonymous SNV	Ush2a:NM_021408:exon62:c.T13738A:p.S4580T	1qH6
chr1	188947125	188947125	C	T	exonic	Ush2a	.	synonymous SNV	Ush2a:NM_021408:exon65:c.C14529T:p.P4843P	1qH6
chr1	188962785	188962785	C	T	exonic	Ush2a	.	nonsynonymous SNV	Ush2a:NM_021408:exon70:c.C15338T:p.S5113F	1qH6
chr1	192901771	192901771	C	G	exonic	Syt14	.	synonymous SNV	Syt14:NM_001301370:exon7:c.G1335C:p.L445L,Syt14:NM_181546:exon7:c.G1335C:p.L445L	1qH6
chr1	193338987	193338987	G	C	exonic	Lamb3	.	nonsynonymous SNV	Lamb3:NM_001277928:exon19:c.G2871C:p.R957S,Lamb3:NM_008484:exon19:c.G2871C:p.R957S	1qH6
chr10	18122523	18122523	C	G	exonic	Reps1	.	nonsynonymous SNV	Reps1:NM_001111065:exon16:c.C1976G:p.A659G,Reps1:NM_009048:exon17:c.C2057G:p.A686G	10qA3
chr10	34394237	34394237	C	T	exonic	Col10a1	.	synonymous SNV	Col10a1:NM_009925:exon3:c.C204T:p.T68T	10qB1
chr10	45419164	45419164	C	G	exonic	Lin28b	.	nonsynonymous SNV	Lin28b:NM_001031772:exon4:c.G422C:p.R141P	10qB2
chr10	58231168	58231168	C	A	exonic	Dux	.	nonsynonymous SNV	Dux:NM_001081954:exon1:c.G1508T:p.C503F	10qB4
chr10	58231344	58231344	C	G	exonic	Dux	.	nonsynonymous SNV	Dux:NM_001081954:exon1:c.G1332C:p.L444F	10qB4
chr10	58231387	58231387	T	G	exonic	Dux	.	nonsynonymous SNV	Dux:NM_001081954:exon1:c.A1289C:p.Q430P	10qB4
chr10	58231676	58231676	A	C	exonic	Dux	.	nonsynonymous SNV	Dux:NM_001081954:exon1:c.T1000G:p.S334A	10qB4
chr10	58231704	58231704	A	C	exonic	Dux	.	nonsynonymous SNV	Dux:NM_001081954:exon1:c.T972G:p.F324L	10qB4
chr10	58231705	58231705	A	T	exonic	Dux	.	nonsynonymous SNV	Dux:NM_001081954:exon1:c.T971A:p.F324Y	10qB4
chr10	58231706	58231706	A	G	exonic	Dux	.	nonsynonymous SNV	Dux:NM_001081954:exon1:c.T970C:p.F324L	10qB4
chr10	58231743	58231743	T	A	exonic	Dux	.	synonymous SNV	Dux:NM_001081954:exon1:c.A933T:p.S311S	10qB4
chr10	58231784	58231784	A	T	exonic	Dux	.	nonsynonymous SNV	Dux:NM_001081954:exon1:c.T892A:p.W298R	10qB4
chr10	58231793	58231793	T	C	exonic	Dux	.	nonsynonymous SNV	Dux:NM_001081954:exon1:c.A883G:p.K295E	10qB4
chr10	58231924	58231924	T	C	exonic	Dux	.	nonsynonymous SNV	Dux:NM_001081954:exon1:c.A752G:p.Q251R	10qB4
chr10	58231988	58231988	T	C	exonic	Dux	.	nonsynonymous SNV	Dux:NM_001081954:exon1:c.A688G:p.R230G	10qB4
chr10	60277748	60277748	C	T	exonic	Psap	.	synonymous SNV	Psap:NM_001146120:exon1:c.C6T:p.Y2Y,Psap:NM_001146121:exon1:c.C6T:p.Y2Y,Psap:NM_001146122:exon1:c.C6T:p.Y2Y,Psap:NM_001146123:exon1:c.C6T:p.Y2Y,Psap:NM_011179:exon1:c.C6T:p.Y2Y	10qB4
chr10	60293372	60293372	G	A	exonic	Psap	.	synonymous SNV	Psap:NM_001146120:exon4:c.G273A:p.E91E,Psap:NM_001146121:exon4:c.G273A:p.E91E,Psap:NM_001146122:exon4:c.G273A:p.E91E,Psap:NM_001146123:exon4:c.G273A:p.E91E,Psap:NM_001146124:exon4:c.G264A:p.E88E,Psap:NM_011179:exon4:c.G273A:p.E91E	10qB4
chr10	60294595	60294595	C	T	exonic	Psap	.	synonymous SNV	Psap:NM_001146120:exon5:c.C438T:p.A146A,Psap:NM_001146121:exon5:c.C438T:p.A146A,Psap:NM_001146122:exon5:c.C438T:p.A146A,Psap:NM_001146123:exon5:c.C438T:p.A146A,Psap:NM_001146124:exon5:c.C429T:p.A143A,Psap:NM_011179:exon5:c.C438T:p.A146A	10qB4
chr10	67238174	67238174	T	C	exonic	Jmjd1c	.	nonsynonymous SNV	Jmjd1c:NM_001242396:exon13:c.T5144C:p.L1715P,Jmjd1c:NM_207221:exon14:c.T5684C:p.L1895P	10qB5.1
chr10	74957733	74957733	G	C	exonic	Rsph14	.	nonsynonymous SNV	Rsph14:NM_001163533:exon7:c.C934G:p.L312V,Rsph14:NM_001163534:exon7:c.C835G:p.L279V,Rsph14:NM_001163535:exon7:c.C835G:p.L279V,Rsph14:NM_027730:exon7:c.C931G:p.L311V	10qB5.3
chr10	80131508	80131508	T	G	exonic	Cbarp	.	nonsynonymous SNV	Cbarp:NM_001195268:exon9:c.A1877C:p.D626A	10qC1
chr10	115179662	115179662	T	C	exonic	Tph2	.	synonymous SNV	Tph2:NM_173391:exon3:c.A294G:p.R98R	10qD2
chr10	115179670	115179670	T	G	exonic	Tph2	.	synonymous SNV	Tph2:NM_173391:exon3:c.A286C:p.R96R	10qD2
chr10	115182813	115182813	T	A	exonic	Tph2	.	synonymous SNV	Tph2:NM_173391:exon2:c.A192T:p.V64V	10qD2
chr10	115182816	115182816	C	T	exonic	Tph2	.	synonymous SNV	Tph2:NM_173391:exon2:c.G189A:p.A63A	10qD2
chr10	115202551	115202551	T	C	exonic	Tbc1d15	.	nonsynonymous SNV	Tbc1d15:NM_025706:exon16:c.A1756G:p.I586V	10qD2
chr10	115457849	115457849	A	G	exonic	Lgr5	.	synonymous SNV	Lgr5:NM_010195:exon15:c.T1314C:p.P438P	10qD2
chr10	115462749	115462749	T	C	exonic	Lgr5	.	synonymous SNV	Lgr5:NM_010195:exon12:c.A1089G:p.L363L	10qD2
chr10	115520622	115520622	A	G	exonic	Lgr5	.	nonsynonymous SNV	Lgr5:NM_010195:exon2:c.T268C:p.C90R	10qD2
chr10	115844126	115844126	C	T	exonic	Tspan8	.	synonymous SNV	Tspan8:NM_146010:exon7:c.C645T:p.A215A,Tspan8:NM_001168679:exon8:c.C645T:p.A215A,Tspan8:NM_001168680:exon8:c.C645T:p.A215A	10qD2
chr10	117773094	117773094	T	C	exonic	Nup107	.	synonymous SNV	Nup107:NM_134010:exon14:c.A1215G:p.R405R	10qD2
chr10	117785064	117785064	G	T	exonic	Nup107	.	nonsynonymous SNV	Nup107:NM_134010:exon5:c.C382A:p.H128N	10qD2
chr10	118157266	118157266	T	C	exonic	Mdm1	.	synonymous SNV	Mdm1:NM_001162905:exon8:c.T975C:p.H325H,Mdm1:NM_010785:exon8:c.T1080C:p.H360H,Mdm1:NM_148922:exon8:c.T1080C:p.H360H,Mdm1:NM_001162904:exon9:c.T1110C:p.H370H	10qD2
chr10	118158532	118158532	A	G	exonic	Mdm1	.	nonsynonymous SNV	Mdm1:NM_001162905:exon9:c.A1310G:p.D437G,Mdm1:NM_010785:exon9:c.A1415G:p.D472G,Mdm1:NM_148922:exon9:c.A1415G:p.D472G,Mdm1:NM_001162904:exon10:c.A1445G:p.D482G	10qD2
chr10	118159450	118159450	G	A	exonic	Mdm1	.	synonymous SNV	Mdm1:NM_001162905:exon10:c.G1386A:p.S462S,Mdm1:NM_010785:exon10:c.G1491A:p.S497S,Mdm1:NM_148922:exon10:c.G1491A:p.S497S,Mdm1:NM_001162904:exon11:c.G1521A:p.S507S	10qD2
chr10	118164284	118164284	C	T	exonic	Mdm1	.	synonymous SNV	Mdm1:NM_001162905:exon12:c.C1686T:p.D562D,Mdm1:NM_010785:exon12:c.C1791T:p.D597D,Mdm1:NM_148922:exon12:c.C1791T:p.D597D,Mdm1:NM_001162904:exon13:c.C1821T:p.D607D	10qD2
chr10	118164422	118164422	G	T	exonic	Mdm1	.	synonymous SNV	Mdm1:NM_001162905:exon12:c.G1824T:p.L608L,Mdm1:NM_010785:exon12:c.G1929T:p.L643L,Mdm1:NM_148922:exon12:c.G1929T:p.L643L,Mdm1:NM_001162904:exon13:c.G1959T:p.L653L	10qD2
chr10	118166635	118166635	C	A	exonic	Mdm1	.	synonymous SNV	Mdm1:NM_001162905:exon13:c.C1860A:p.P620P,Mdm1:NM_148922:exon13:c.C1965A:p.P655P,Mdm1:NM_001162904:exon14:c.C1995A:p.P665P	10qD2
chr10	127578061	127578061	G	A	exonic	Lrp1	.	synonymous SNV	Lrp1:NM_008512:exon22:c.C3477T:p.V1159V	10qD3
chr11	3133205	3133205	C	T	exonic	Sfi1	.	synonymous SNV	Sfi1:NM_001363224:exon26:c.G1788A:p.V596V,Sfi1:NM_001363222:exon27:c.G1863A:p.V621V,Sfi1:NM_001363223:exon27:c.G1863A:p.V621V,Sfi1:NM_030207:exon30:c.G3222A:p.V1074V	11qA1
chr11	3187266	3187266	C	T	exonic	Sfi1	.	synonymous SNV	Sfi1:NM_030207:exon3:c.G168A:p.R56R	11qA1
chr11	3187367	3187367	T	C	exonic	Sfi1	.	nonsynonymous SNV	Sfi1:NM_030207:exon3:c.A67G:p.T23A	11qA1
chr11	4784489	4784489	A	G	exonic	Nf2	.	synonymous SNV	Nf2:NM_001361675:exon13:c.T1398C:p.F466F,Nf2:NM_001361676:exon13:c.T1398C:p.F466F,Nf2:NM_001361677:exon13:c.T1386C:p.F462F,Nf2:NM_001252250:exon14:c.T1521C:p.F507F,Nf2:NM_001252251:exon14:c.T1521C:p.F507F,Nf2:NM_001252252:exon14:c.T1521C:p.F507F,Nf2:NM_001252253:exon14:c.T1407C:p.F469F,Nf2:NM_010898:exon14:c.T1521C:p.F507F	11qA1
chr11	4940373	4940373	C	G	exonic	Nefh	.	nonsynonymous SNV	Nefh:NM_010904:exon4:c.G2245C:p.A749P	11qA1
chr11	4940378	4940378	C	G	exonic	Nefh	.	nonsynonymous SNV	Nefh:NM_010904:exon4:c.G2240C:p.G747A	11qA1
chr11	4940383	4940383	G	A	exonic	Nefh	.	synonymous SNV	Nefh:NM_010904:exon4:c.C2235T:p.S745S	11qA1
chr11	40680075	40680075	A	G	exonic	Mat2b	.	synonymous SNV	Mat2b:NM_001199274:exon7:c.T921C:p.S307S,Mat2b:NM_134017:exon7:c.T954C:p.S318S	11qA5
chr11	40680091	40680091	G	A	exonic	Mat2b	.	nonsynonymous SNV	Mat2b:NM_001199274:exon7:c.C905T:p.T302I,Mat2b:NM_134017:exon7:c.C938T:p.T313I	11qA5
chr11	40682490	40682490	G	T	exonic	Mat2b	.	synonymous SNV	Mat2b:NM_001199274:exon5:c.C661A:p.R221R,Mat2b:NM_134017:exon5:c.C694A:p.R232R	11qA5
chr11	40685303	40685303	A	T	exonic	Mat2b	.	synonymous SNV	Mat2b:NM_001199274:exon3:c.T264A:p.P88P,Mat2b:NM_134017:exon3:c.T297A:p.P99P	11qA5
chr11	40703789	40703789	T	C	exonic	Hmmr	.	synonymous SNV	Hmmr:NM_013552:exon17:c.A2358G:p.L786L	11qA5
chr11	40703858	40703858	A	C	exonic	Hmmr	.	synonymous SNV	Hmmr:NM_013552:exon17:c.T2289G:p.A763A	11qA5
chr11	40703867	40703867	T	C	exonic	Hmmr	.	synonymous SNV	Hmmr:NM_013552:exon17:c.A2280G:p.L760L	11qA5
chr11	40705955	40705955	C	T	exonic	Hmmr	.	synonymous SNV	Hmmr:NM_013552:exon16:c.G2148A:p.Q716Q	11qA5
chr11	40707588	40707588	C	T	exonic	Hmmr	.	synonymous SNV	Hmmr:NM_013552:exon14:c.G1911A:p.K637K	11qA5
chr11	40723403	40723403	C	A	exonic	Hmmr	.	nonsynonymous SNV	Hmmr:NM_013552:exon5:c.G457T:p.A153S	11qA5
chr11	40723416	40723416	G	C	exonic	Hmmr	.	nonsynonymous SNV	Hmmr:NM_013552:exon5:c.C444G:p.N148K	11qA5
chr11	40723500	40723500	G	T	exonic	Hmmr	.	synonymous SNV	Hmmr:NM_013552:exon5:c.C360A:p.L120L	11qA5
chr11	40723579	40723579	G	A	exonic	Hmmr	.	nonsynonymous SNV	Hmmr:NM_013552:exon5:c.C281T:p.A94V	11qA5
chr11	40723581	40723581	G	A	exonic	Hmmr	.	synonymous SNV	Hmmr:NM_013552:exon5:c.C279T:p.R93R	11qA5
chr11	40736497	40736497	C	T	exonic	Nudcd2	.	synonymous SNV	Nudcd2:NM_026023:exon3:c.C243T:p.D81D	11qA5
chr11	40751309	40751309	T	C	exonic	Ccng1	.	synonymous SNV	Ccng1:NM_009831:exon5:c.A645G:p.K215K	11qA5
chr11	40754044	40754044	A	C	exonic	Ccng1	.	nonsynonymous SNV	Ccng1:NM_009831:exon2:c.T25G:p.S9A	11qA5
chr11	41920522	41920522	G	A	exonic	Gabrg2	.	synonymous SNV	Gabrg2:NM_008073:exon7:c.C795T:p.F265F,Gabrg2:NM_177408:exon7:c.C795T:p.F265F,Gabrg2:NM_001362655:exon8:c.C741T:p.F247F,Gabrg2:NM_001362656:exon8:c.C738T:p.F246F	11qA5
chr11	43151725	43151725	A	G	exonic	Atp10b	.	synonymous SNV	Atp10b:NM_176999:exon2:c.A111G:p.R37R	11qA5
chr11	43153305	43153305	A	G	exonic	Atp10b	.	nonsynonymous SNV	Atp10b:NM_176999:exon3:c.A357G:p.I119M	11qA5
chr11	43422906	43422906	A	G	exonic	Pttg1	.	synonymous SNV	Pttg1:NM_013917:exon3:c.T348C:p.P116P,Pttg1:NM_001131054:exon4:c.T348C:p.P116P,Pttg1:NM_001362799:exon4:c.T348C:p.P116P	11qB1.1
chr11	43422945	43422945	A	C	exonic	Pttg1	.	synonymous SNV	Pttg1:NM_013917:exon3:c.T309G:p.A103A,Pttg1:NM_001131054:exon4:c.T309G:p.A103A,Pttg1:NM_001362799:exon4:c.T309G:p.A103A	11qB1.1
chr11	43422972	43422972	A	G	exonic	Pttg1	.	synonymous SNV	Pttg1:NM_013917:exon3:c.T282C:p.S94S,Pttg1:NM_001131054:exon4:c.T282C:p.S94S,Pttg1:NM_001362799:exon4:c.T282C:p.S94S	11qB1.1
chr11	43424761	43424761	G	A	exonic	Pttg1	.	synonymous SNV	Pttg1:NM_013917:exon2:c.C225T:p.G75G,Pttg1:NM_001131054:exon3:c.C225T:p.G75G,Pttg1:NM_001362799:exon3:c.C225T:p.G75G	11qB1.1
chr11	43425625	43425625	G	T	exonic	Pttg1	.	nonsynonymous SNV	Pttg1:NM_013917:exon1:c.C46A:p.R16S,Pttg1:NM_001131054:exon2:c.C46A:p.R16S,Pttg1:NM_001362799:exon2:c.C46A:p.R16S	11qB1.1
chr11	43438267	43438267	C	T	exonic	Slu7	.	synonymous SNV	Slu7:NM_198936:exon3:c.C315T:p.G105G,Slu7:NM_148673:exon4:c.C315T:p.G105G	11qB1.1
chr11	43440619	43440619	G	A	exonic	Slu7	.	synonymous SNV	Slu7:NM_198936:exon6:c.G579A:p.R193R,Slu7:NM_148673:exon7:c.G579A:p.R193R	11qB1.1
chr11	43441475	43441475	C	T	exonic	Slu7	.	synonymous SNV	Slu7:NM_198936:exon8:c.C717T:p.D239D,Slu7:NM_148673:exon9:c.C717T:p.D239D	11qB1.1
chr11	43441906	43441906	G	A	exonic	Slu7	.	synonymous SNV	Slu7:NM_198936:exon9:c.G903A:p.G301G,Slu7:NM_148673:exon10:c.G903A:p.G301G	11qB1.1
chr11	43445195	43445195	G	A	exonic	Slu7	.	synonymous SNV	Slu7:NM_198936:exon14:c.G1404A:p.E468E,Slu7:NM_148673:exon15:c.G1404A:p.E468E	11qB1.1
chr11	43445209	43445209	G	A	exonic	Slu7	.	nonsynonymous SNV	Slu7:NM_198936:exon14:c.G1418A:p.G473D,Slu7:NM_148673:exon15:c.G1418A:p.G473D	11qB1.1
chr11	43445244	43445244	G	A	exonic	Slu7	.	nonsynonymous SNV	Slu7:NM_198936:exon14:c.G1453A:p.A485T,Slu7:NM_148673:exon15:c.G1453A:p.A485T	11qB1.1
chr11	43445250	43445250	C	A	exonic	Slu7	.	nonsynonymous SNV	Slu7:NM_198936:exon14:c.C1459A:p.L487M,Slu7:NM_148673:exon15:c.C1459A:p.L487M	11qB1.1
chr11	43445361	43445361	A	G	exonic	Slu7	.	synonymous SNV	Slu7:NM_198936:exon15:c.A1467G:p.L489L,Slu7:NM_148673:exon16:c.A1467G:p.L489L	11qB1.1
chr11	43445382	43445382	G	A	exonic	Slu7	.	synonymous SNV	Slu7:NM_198936:exon15:c.G1488A:p.E496E,Slu7:NM_148673:exon16:c.G1488A:p.E496E	11qB1.1
chr11	44412527	44412527	T	C	exonic	Il12b	.	nonsynonymous SNV	Il12b:NM_001303244:exon7:c.T880C:p.F294L	11qB1.1
chr11	44412613	44412613	A	G	exonic	Il12b	.	synonymous SNV	Il12b:NM_001303244:exon7:c.A966G:p.S322S	11qB1.1
chr11	44463724	44463724	G	A	exonic	Ublcp1	.	synonymous SNV	Ublcp1:NM_024475:exon6:c.C481T:p.L161L	11qB1.1
chr11	44466846	44466846	T	C	exonic	Ublcp1	.	synonymous SNV	Ublcp1:NM_024475:exon2:c.A123G:p.E41E	11qB1.1
chr11	44561572	44561572	T	C	exonic	Rnf145	.	synonymous SNV	Rnf145:NM_001363166:exon10:c.T1377C:p.R459R,Rnf145:NM_028862:exon10:c.T1377C:p.R459R	11qB1.1
chr11	44561806	44561806	C	T	exonic	Rnf145	.	synonymous SNV	Rnf145:NM_001363166:exon10:c.C1611T:p.C537C,Rnf145:NM_028862:exon10:c.C1611T:p.C537C	11qB1.1
chr11	44620540	44620540	G	T	exonic	Ebf1	.	synonymous SNV	Ebf1:NM_001290709:exon2:c.G261T:p.T87T,Ebf1:NM_001290710:exon2:c.G261T:p.T87T,Ebf1:NM_001362569:exon2:c.G165T:p.T55T,Ebf1:NM_001362571:exon2:c.G261T:p.T87T,Ebf1:NM_001362574:exon2:c.G261T:p.T87T,Ebf1:NM_007897:exon2:c.G261T:p.T87T,Ebf1:NM_001362575:exon3:c.G210T:p.T70T	11qB1.1
chr11	46342442	46342442	T	C	exonic	Itk	.	synonymous SNV	Itk:NM_001281965:exon9:c.A825G:p.T275T,Itk:NM_001281966:exon9:c.A816G:p.T272T,Itk:NM_001281968:exon9:c.A804G:p.T268T,Itk:NM_010583:exon9:c.A807G:p.T269T	11qB1.1
chr11	46406875	46406875	G	T	exonic	Fam71b	.	synonymous SNV	Fam71b:NM_001013783:exon2:c.G1005T:p.G335G	11qB1.1
chr11	46406884	46406884	C	A	exonic	Fam71b	.	synonymous SNV	Fam71b:NM_001013783:exon2:c.C1014A:p.A338A	11qB1.1
chr11	46406886	46406886	A	G	exonic	Fam71b	.	nonsynonymous SNV	Fam71b:NM_001013783:exon2:c.A1016G:p.E339G	11qB1.1
chr11	46407214	46407214	A	G	exonic	Fam71b	.	synonymous SNV	Fam71b:NM_001013783:exon2:c.A1344G:p.P448P	11qB1.1
chr11	46456271	46456271	C	G	exonic	Havcr2	.	nonsynonymous SNV	Havcr2:NM_134250:exon2:c.C74G:p.A25G	11qB1.1
chr11	46456276	46456276	G	A	exonic	Havcr2	.	nonsynonymous SNV	Havcr2:NM_134250:exon2:c.G79A:p.V27M	11qB1.1
chr11	46456277	46456277	T	A	exonic	Havcr2	.	nonsynonymous SNV	Havcr2:NM_134250:exon2:c.T80A:p.V27E	11qB1.1
chr11	46456279	46456279	T	G	exonic	Havcr2	.	nonsynonymous SNV	Havcr2:NM_134250:exon2:c.T82G:p.F28V	11qB1.1
chr11	46456293	46456293	G	A	exonic	Havcr2	.	synonymous SNV	Havcr2:NM_134250:exon2:c.G96A:p.K32K	11qB1.1
chr11	46456324	46456324	T	C	exonic	Havcr2	.	nonsynonymous SNV	Havcr2:NM_134250:exon2:c.T127C:p.S43P	11qB1.1
chr11	46456330	46456330	C	T	exonic	Havcr2	.	nonsynonymous SNV	Havcr2:NM_134250:exon2:c.C133T:p.P45S	11qB1.1
chr11	46456336	46456336	G	A	exonic	Havcr2	.	nonsynonymous SNV	Havcr2:NM_134250:exon2:c.G139A:p.A47T	11qB1.1
chr11	46456392	46456392	C	T	exonic	Havcr2	.	synonymous SNV	Havcr2:NM_134250:exon2:c.C195T:p.N65N	11qB1.1
chr11	46456476	46456476	C	T	exonic	Havcr2	.	synonymous SNV	Havcr2:NM_134250:exon2:c.C279T:p.D93D	11qB1.1
chr11	46528416	46528416	C	G	exonic	Gm12169	.	nonsynonymous SNV	Gm12169:NM_001163357:exon3:c.C58G:p.H20D	11qB1.1
chr11	46679660	46679660	G	T	exonic	Timd2	.	nonsynonymous SNV	Timd2:NM_001161355:exon5:c.C587A:p.S196Y,Timd2:NM_001161356:exon5:c.C587A:p.S196Y,Timd2:NM_134249:exon5:c.C587A:p.S196Y	11qB1.1
chr11	46679661	46679661	A	C	exonic	Timd2	.	nonsynonymous SNV	Timd2:NM_001161355:exon5:c.T586G:p.S196A,Timd2:NM_001161356:exon5:c.T586G:p.S196A,Timd2:NM_134249:exon5:c.T586G:p.S196A	11qB1.1
chr11	46756150	46756150	G	C	exonic	Havcr1	.	nonsynonymous SNV	Havcr1:NM_134248:exon3:c.G410C:p.R137T,Havcr1:NM_001166631:exon4:c.G410C:p.R137T,Havcr1:NM_001166632:exon4:c.G410C:p.R137T	11qB1.1
chr11	47132653	47132653	G	A	exonic	Sgcd	.	synonymous SNV	Sgcd:NM_011891:exon4:c.C324T:p.N108N	11qB1.1
chr11	49095438	49095438	G	A	exonic	Ifi47	.	nonsynonymous SNV	Ifi47:NM_008330:exon2:c.G31A:p.G11S,Ifi47:NM_001271676:exon3:c.G31A:p.G11S,Ifi47:NM_001271677:exon3:c.G31A:p.G11S	11qB1.2
chr11	49095837	49095837	G	A	exonic	Ifi47	.	nonsynonymous SNV	Ifi47:NM_008330:exon2:c.G430A:p.A144T,Ifi47:NM_001271676:exon3:c.G430A:p.A144T,Ifi47:NM_001271677:exon3:c.G430A:p.A144T	11qB1.2
chr11	49096052	49096052	A	T	exonic	Ifi47	.	synonymous SNV	Ifi47:NM_008330:exon2:c.A645T:p.R215R,Ifi47:NM_001271676:exon3:c.A645T:p.R215R,Ifi47:NM_001271677:exon3:c.A645T:p.R215R	11qB1.2
chr11	49096098	49096098	T	C	exonic	Ifi47	.	nonsynonymous SNV	Ifi47:NM_008330:exon2:c.T691C:p.C231R,Ifi47:NM_001271676:exon3:c.T691C:p.C231R,Ifi47:NM_001271677:exon3:c.T691C:p.C231R	11qB1.2
chr11	49096127	49096127	G	A	exonic	Ifi47	.	synonymous SNV	Ifi47:NM_008330:exon2:c.G720A:p.L240L,Ifi47:NM_001271676:exon3:c.G720A:p.L240L,Ifi47:NM_001271677:exon3:c.G720A:p.L240L	11qB1.2
chr11	49096131	49096131	G	A	exonic	Ifi47	.	nonsynonymous SNV	Ifi47:NM_008330:exon2:c.G724A:p.A242T,Ifi47:NM_001271676:exon3:c.G724A:p.A242T,Ifi47:NM_001271677:exon3:c.G724A:p.A242T	11qB1.2
chr11	49096132	49096132	C	T	exonic	Ifi47	.	nonsynonymous SNV	Ifi47:NM_008330:exon2:c.C725T:p.A242V,Ifi47:NM_001271676:exon3:c.C725T:p.A242V,Ifi47:NM_001271677:exon3:c.C725T:p.A242V	11qB1.2
chr11	49096139	49096139	T	C	exonic	Ifi47	.	synonymous SNV	Ifi47:NM_008330:exon2:c.T732C:p.D244D,Ifi47:NM_001271676:exon3:c.T732C:p.D244D,Ifi47:NM_001271677:exon3:c.T732C:p.D244D	11qB1.2
chr11	49096223	49096223	G	T	exonic	Ifi47	.	synonymous SNV	Ifi47:NM_008330:exon2:c.G816T:p.S272S,Ifi47:NM_001271676:exon3:c.G816T:p.S272S,Ifi47:NM_001271677:exon3:c.G816T:p.S272S	11qB1.2
chr11	49096268	49096268	C	T	exonic	Ifi47	.	synonymous SNV	Ifi47:NM_008330:exon2:c.C861T:p.I287I,Ifi47:NM_001271676:exon3:c.C861T:p.I287I,Ifi47:NM_001271677:exon3:c.C861T:p.I287I	11qB1.2
chr11	49113050	49113050	G	A	exonic	Olfr1396	.	synonymous SNV	Olfr1396:NM_146337:exon1:c.C675T:p.T225T	11qB1.2
chr11	49113380	49113380	C	G	exonic	Olfr1396	.	nonsynonymous SNV	Olfr1396:NM_146337:exon1:c.G345C:p.L115F	11qB1.2
chr11	49113395	49113395	T	C	exonic	Olfr1396	.	synonymous SNV	Olfr1396:NM_146337:exon1:c.A330G:p.G110G	11qB1.2
chr11	49135100	49135100	A	C	exonic	Olfr56	.	synonymous SNV	Olfr56:NM_010999:exon1:c.A907C:p.R303R	11qB1.2
chr11	49149035	49149035	A	G	exonic	Olfr1395	.	synonymous SNV	Olfr1395:NM_146877:exon1:c.A777G:p.T259T	11qB1.2
chr11	49149155	49149155	C	G	exonic	Olfr1395	.	synonymous SNV	Olfr1395:NM_146877:exon1:c.C897G:p.T299T	11qB1.2
chr11	49149166	49149166	G	A	exonic	Olfr1395	.	nonsynonymous SNV	Olfr1395:NM_146877:exon1:c.G908A:p.R303K	11qB1.2
chr11	49160469	49160469	A	G	exonic	Olfr1394	.	nonsynonymous SNV	Olfr1394:NM_146276:exon1:c.A454G:p.M152V	11qB1.2
chr11	49160543	49160543	G	A	exonic	Olfr1394	.	synonymous SNV	Olfr1394:NM_146276:exon1:c.G528A:p.V176V	11qB1.2
chr11	49160585	49160585	C	T	exonic	Olfr1394	.	synonymous SNV	Olfr1394:NM_146276:exon1:c.C570T:p.S190S	11qB1.2
chr11	49160819	49160819	A	G	exonic	Olfr1394	.	synonymous SNV	Olfr1394:NM_146276:exon1:c.A804G:p.R268R	11qB1.2
chr11	49169423	49169423	A	G	exonic	Btnl9	.	synonymous SNV	Btnl9:NM_172793:exon10:c.T1242C:p.A414A	11qB1.2
chr11	49169453	49169453	G	C	exonic	Btnl9	.	synonymous SNV	Btnl9:NM_172793:exon10:c.C1212G:p.R404R	11qB1.2
chr11	49175614	49175614	G	A	exonic	Btnl9	.	synonymous SNV	Btnl9:NM_172793:exon5:c.C819T:p.L273L	11qB1.2
chr11	49175621	49175621	A	G	exonic	Btnl9	.	nonsynonymous SNV	Btnl9:NM_172793:exon5:c.T812C:p.I271T	11qB1.2
chr11	49178719	49178719	A	G	exonic	Btnl9	.	synonymous SNV	Btnl9:NM_172793:exon4:c.T732C:p.I244I	11qB1.2
chr11	49178791	49178791	T	C	exonic	Btnl9	.	synonymous SNV	Btnl9:NM_172793:exon4:c.A660G:p.G220G	11qB1.2
chr11	49178887	49178887	A	G	exonic	Btnl9	.	synonymous SNV	Btnl9:NM_172793:exon4:c.T564C:p.G188G	11qB1.2
chr11	49180874	49180874	A	G	exonic	Btnl9	.	synonymous SNV	Btnl9:NM_172793:exon3:c.T121C:p.L41L	11qB1.2
chr11	49215451	49215451	T	C	exonic	Zfp62	.	nonsynonymous SNV	Zfp62:NM_001362726:exon2:c.T389C:p.L130S,Zfp62:NM_001362730:exon3:c.T368C:p.L123S,Zfp62:NM_001362725:exon4:c.T389C:p.L130S,Zfp62:NM_001362727:exon4:c.T389C:p.L130S,Zfp62:NM_009562:exon4:c.T389C:p.L130S,Zfp62:NM_001024846:exon5:c.T368C:p.L123S,Zfp62:NM_001362728:exon5:c.T368C:p.L123S,Zfp62:NM_001362729:exon5:c.T368C:p.L123S,Zfp62:NM_001362731:exon6:c.T368C:p.L123S	11qB1.2
chr11	49215598	49215598	G	A	exonic	Zfp62	.	nonsynonymous SNV	Zfp62:NM_001362726:exon2:c.G536A:p.R179H,Zfp62:NM_001362730:exon3:c.G515A:p.R172H,Zfp62:NM_001362725:exon4:c.G536A:p.R179H,Zfp62:NM_001362727:exon4:c.G536A:p.R179H,Zfp62:NM_009562:exon4:c.G536A:p.R179H,Zfp62:NM_001024846:exon5:c.G515A:p.R172H,Zfp62:NM_001362728:exon5:c.G515A:p.R172H,Zfp62:NM_001362729:exon5:c.G515A:p.R172H,Zfp62:NM_001362731:exon6:c.G515A:p.R172H	11qB1.2
chr11	49216061	49216061	A	G	exonic	Zfp62	.	synonymous SNV	Zfp62:NM_001362726:exon2:c.A999G:p.E333E,Zfp62:NM_001362730:exon3:c.A978G:p.E326E,Zfp62:NM_001362725:exon4:c.A999G:p.E333E,Zfp62:NM_001362727:exon4:c.A999G:p.E333E,Zfp62:NM_009562:exon4:c.A999G:p.E333E,Zfp62:NM_001024846:exon5:c.A978G:p.E326E,Zfp62:NM_001362728:exon5:c.A978G:p.E326E,Zfp62:NM_001362729:exon5:c.A978G:p.E326E,Zfp62:NM_001362731:exon6:c.A978G:p.E326E	11qB1.2
chr11	49281031	49281031	G	T	exonic	Olfr1393	.	nonsynonymous SNV	Olfr1393:NM_146471:exon1:c.G882T:p.K294N	11qB1.2
chr11	49293513	49293513	G	C	exonic	Olfr1392	.	nonsynonymous SNV	Olfr1392:NM_146470:exon1:c.G191C:p.C64S	11qB1.2
chr11	49293514	49293514	C	T	exonic	Olfr1392	.	synonymous SNV	Olfr1392:NM_146470:exon1:c.C192T:p.C64C	11qB1.2
chr11	49293931	49293931	A	G	exonic	Olfr1392	.	synonymous SNV	Olfr1392:NM_146470:exon1:c.A609G:p.A203A	11qB1.2
chr11	49294204	49294204	A	T	exonic	Olfr1392	.	nonsynonymous SNV	Olfr1392:NM_146470:exon1:c.A882T:p.K294N	11qB1.2
chr11	49444346	49444346	T	C	exonic	Olfr1388	.	nonsynonymous SNV	Olfr1388:NM_146467:exon1:c.T494C:p.V165A	11qB1.2
chr11	49444508	49444508	A	G	exonic	Olfr1388	.	nonsynonymous SNV	Olfr1388:NM_146467:exon1:c.A656G:p.H219R	11qB1.2
chr11	49459980	49459980	G	A	exonic	Olfr1387	.	synonymous SNV	Olfr1387:NM_146473:exon1:c.G300A:p.Q100Q	11qB1.2
chr11	49590030	49590030	G	A	exonic	1700024J04Rik	.	nonsynonymous SNV	1700024J04Rik:NM_001378508:exon1:c.C217T:p.P73S	11qB1.2
chr11	50119079	50119079	A	G	exonic	Rnf130	.	synonymous SNV	Rnf130:NM_001290750:exon8:c.A1185G:p.P395P	11qB1.3
chr11	50135924	50135924	T	C	exonic	Tbc1d9b	.	nonsynonymous SNV	Tbc1d9b:NM_001290759:exon2:c.T218C:p.I73T,Tbc1d9b:NM_001290760:exon2:c.T218C:p.I73T,Tbc1d9b:NM_029745:exon2:c.T218C:p.I73T	11qB1.3
chr11	50152628	50152628	C	G	exonic	Tbc1d9b	.	synonymous SNV	Tbc1d9b:NM_001290759:exon10:c.C1575G:p.A525A,Tbc1d9b:NM_001290760:exon10:c.C1575G:p.A525A,Tbc1d9b:NM_029745:exon10:c.C1575G:p.A525A	11qB1.3
chr11	50297101	50297101	A	C	exonic	Canx	.	nonsynonymous SNV	Canx:NM_001110499:exon14:c.T1679G:p.V560G,Canx:NM_001110500:exon14:c.T1679G:p.V560G,Canx:NM_007597:exon14:c.T1679G:p.V560G	11qB1.3
chr11	50785580	50785580	T	C	exonic	Adamts2	.	synonymous SNV	Adamts2:NM_175643:exon14:c.T2121C:p.R707R	11qB1.3
chr11	50785661	50785661	G	C	exonic	Adamts2	.	synonymous SNV	Adamts2:NM_175643:exon14:c.G2202C:p.P734P	11qB1.3
chr11	50788753	50788753	T	C	exonic	Adamts2	.	synonymous SNV	Adamts2:NM_175643:exon17:c.T2559C:p.D853D	11qB1.3
chr11	50791855	50791855	A	G	exonic	Adamts2	.	synonymous SNV	Adamts2:NM_175643:exon18:c.A2673G:p.V891V	11qB1.3
chr11	50803702	50803702	C	T	exonic	Adamts2	.	synonymous SNV	Adamts2:NM_175643:exon22:c.C3315T:p.D1105D	11qB1.3
chr11	50803775	50803775	G	C	exonic	Adamts2	.	nonsynonymous SNV	Adamts2:NM_175643:exon22:c.G3388C:p.V1130L	11qB1.3
chr11	50817816	50817816	G	A	exonic	Zfp354c	.	synonymous SNV	Zfp354c:NM_013922:exon3:c.C153T:p.A51A	11qB1.3
chr11	50817882	50817882	C	T	exonic	Zfp354c	.	synonymous SNV	Zfp354c:NM_013922:exon3:c.G87A:p.L29L	11qB1.3
chr11	50833118	50833118	C	T	exonic	Zfp879	.	synonymous SNV	Zfp879:NM_001290779:exon4:c.G891A:p.K297K,Zfp879:NM_173387:exon5:c.G1110A:p.K370K	11qB1.3
chr11	50833599	50833599	C	A	exonic	Zfp879	.	nonsynonymous SNV	Zfp879:NM_001290779:exon4:c.G410T:p.G137V,Zfp879:NM_173387:exon5:c.G629T:p.G210V	11qB1.3
chr11	50851393	50851393	A	G	exonic	Grm6	.	synonymous SNV	Grm6:NM_173372:exon2:c.A252G:p.R84R	11qB1.3
chr11	50851396	50851396	A	G	exonic	Grm6	.	synonymous SNV	Grm6:NM_173372:exon2:c.A255G:p.L85L	11qB1.3
chr11	50855732	50855732	G	A	exonic	Grm6	.	synonymous SNV	Grm6:NM_173372:exon5:c.G888A:p.L296L	11qB1.3
chr11	50857018	50857018	T	C	exonic	Grm6	.	synonymous SNV	Grm6:NM_173372:exon6:c.T1056C:p.A352A	11qB1.3
chr11	50899961	50899961	T	A	exonic	Zfp2	.	synonymous SNV	Zfp2:NM_001044697:exon6:c.A1254T:p.I418I,Zfp2:NM_001044698:exon6:c.A1254T:p.I418I,Zfp2:NM_001044700:exon6:c.A1254T:p.I418I,Zfp2:NM_001294323:exon6:c.A1254T:p.I418I,Zfp2:NM_178447:exon7:c.A1254T:p.I418I	11qB1.3
chr11	50900420	50900420	C	T	exonic	Zfp2	.	synonymous SNV	Zfp2:NM_001044697:exon6:c.G795A:p.E265E,Zfp2:NM_001044698:exon6:c.G795A:p.E265E,Zfp2:NM_001044700:exon6:c.G795A:p.E265E,Zfp2:NM_001294323:exon6:c.G795A:p.E265E,Zfp2:NM_178447:exon7:c.G795A:p.E265E	11qB1.3
chr11	50900477	50900477	G	A	exonic	Zfp2	.	synonymous SNV	Zfp2:NM_001044697:exon6:c.C738T:p.G246G,Zfp2:NM_001044698:exon6:c.C738T:p.G246G,Zfp2:NM_001044700:exon6:c.C738T:p.G246G,Zfp2:NM_001294323:exon6:c.C738T:p.G246G,Zfp2:NM_178447:exon7:c.C738T:p.G246G	11qB1.3
chr11	50923535	50923535	C	T	exonic	Zfp354b	.	nonsynonymous SNV	Zfp354b:NM_013744:exon5:c.G562A:p.E188K	11qB1.3
chr11	50969539	50969539	A	G	exonic	Olfr1378	.	nonsynonymous SNV	Olfr1378:NM_146910:exon1:c.A520G:p.M174V	11qB1.3
chr11	50969654	50969654	C	T	exonic	Olfr1378	.	nonsynonymous SNV	Olfr1378:NM_146910:exon1:c.C635T:p.T212I	11qB1.3
chr11	50984750	50984750	G	A	exonic	Olfr1377	.	synonymous SNV	Olfr1377:NM_146911:exon1:c.G48A:p.G16G	11qB1.3
chr11	50984774	50984774	G	A	exonic	Olfr1377	.	synonymous SNV	Olfr1377:NM_146911:exon1:c.G72A:p.E24E	11qB1.3
chr11	50984968	50984968	G	T	exonic	Olfr1377	.	nonsynonymous SNV	Olfr1377:NM_146911:exon1:c.G266T:p.S89I	11qB1.3
chr11	50984973	50984973	T	A	exonic	Olfr1377	.	nonsynonymous SNV	Olfr1377:NM_146911:exon1:c.T271A:p.S91T	11qB1.3
chr11	51007070	51007070	T	C	exonic	Olfr51	.	nonsynonymous SNV	Olfr51:NM_146909:exon1:c.T97C:p.W33R	11qB1.3
chr11	51007195	51007195	A	G	exonic	Olfr51	.	synonymous SNV	Olfr51:NM_146909:exon1:c.A222G:p.P74P	11qB1.3
chr11	51007328	51007328	G	T	exonic	Olfr51	.	nonsynonymous SNV	Olfr51:NM_146909:exon1:c.G355T:p.A119S	11qB1.3
chr11	51007331	51007331	T	A	exonic	Olfr51	.	nonsynonymous SNV	Olfr51:NM_146909:exon1:c.T358A:p.Y120N	11qB1.3
chr11	51007338	51007338	G	A	exonic	Olfr51	.	nonsynonymous SNV	Olfr51:NM_146909:exon1:c.G365A:p.R122H	11qB1.3
chr11	51007370	51007370	A	C	exonic	Olfr51	.	nonsynonymous SNV	Olfr51:NM_146909:exon1:c.A397C:p.T133P	11qB1.3
chr11	51007384	51007384	A	G	exonic	Olfr51	.	synonymous SNV	Olfr51:NM_146909:exon1:c.A411G:p.R137R	11qB1.3
chr11	51007397	51007397	G	A	exonic	Olfr51	.	nonsynonymous SNV	Olfr51:NM_146909:exon1:c.G424A:p.V142I	11qB1.3
chr11	51007466	51007466	C	T	exonic	Olfr51	.	stopgain	Olfr51:NM_146909:exon1:c.C493T:p.R165X	11qB1.3
chr11	51048162	51048162	T	C	exonic	Olfr1375	.	synonymous SNV	Olfr1375:NM_146516:exon1:c.T54C:p.G18G	11qB1.3
chr11	51048228	51048228	G	A	exonic	Olfr1375	.	synonymous SNV	Olfr1375:NM_146516:exon1:c.G120A:p.T40T	11qB1.3
chr11	51048274	51048274	T	C	exonic	Olfr1375	.	nonsynonymous SNV	Olfr1375:NM_146516:exon1:c.T166C:p.C56R	11qB1.3
chr11	51048319	51048319	G	C	exonic	Olfr1375	.	nonsynonymous SNV	Olfr1375:NM_146516:exon1:c.G211C:p.V71L	11qB1.3
chr11	51048367	51048367	C	A	exonic	Olfr1375	.	nonsynonymous SNV	Olfr1375:NM_146516:exon1:c.C259A:p.H87N	11qB1.3
chr11	51048451	51048451	C	T	exonic	Olfr1375	.	nonsynonymous SNV	Olfr1375:NM_146516:exon1:c.C343T:p.L115F	11qB1.3
chr11	51048484	51048484	G	C	exonic	Olfr1375	.	nonsynonymous SNV	Olfr1375:NM_146516:exon1:c.G376C:p.V126L	11qB1.3
chr11	51048508	51048508	T	C	exonic	Olfr1375	.	nonsynonymous SNV	Olfr1375:NM_146516:exon1:c.T400C:p.Y134H	11qB1.3
chr11	51048546	51048546	G	A	exonic	Olfr1375	.	synonymous SNV	Olfr1375:NM_146516:exon1:c.G438A:p.L146L	11qB1.3
chr11	51048547	51048547	G	T	exonic	Olfr1375	.	nonsynonymous SNV	Olfr1375:NM_146516:exon1:c.G439T:p.A147S	11qB1.3
chr11	51048563	51048563	T	C	exonic	Olfr1375	.	nonsynonymous SNV	Olfr1375:NM_146516:exon1:c.T455C:p.M152T	11qB1.3
chr11	51048564	51048564	G	A	exonic	Olfr1375	.	nonsynonymous SNV	Olfr1375:NM_146516:exon1:c.G456A:p.M152I	11qB1.3
chr11	51048601	51048601	A	C	exonic	Olfr1375	.	nonsynonymous SNV	Olfr1375:NM_146516:exon1:c.A493C:p.M165L	11qB1.3
chr11	51048615	51048615	G	T	exonic	Olfr1375	.	nonsynonymous SNV	Olfr1375:NM_146516:exon1:c.G507T:p.R169S	11qB1.3
chr11	51048666	51048666	G	C	exonic	Olfr1375	.	synonymous SNV	Olfr1375:NM_146516:exon1:c.G558C:p.L186L	11qB1.3
chr11	51048672	51048672	G	A	exonic	Olfr1375	.	nonsynonymous SNV	Olfr1375:NM_146516:exon1:c.G564A:p.M188I	11qB1.3
chr11	51048684	51048684	C	T	exonic	Olfr1375	.	synonymous SNV	Olfr1375:NM_146516:exon1:c.C576T:p.C192C	11qB1.3
chr11	51048687	51048687	G	A	exonic	Olfr1375	.	synonymous SNV	Olfr1375:NM_146516:exon1:c.G579A:p.S193S	11qB1.3
chr11	51048706	51048706	C	G	exonic	Olfr1375	.	nonsynonymous SNV	Olfr1375:NM_146516:exon1:c.C598G:p.L200V	11qB1.3
chr11	51048707	51048707	T	A	exonic	Olfr1375	.	nonsynonymous SNV	Olfr1375:NM_146516:exon1:c.T599A:p.L200H	11qB1.3
chr11	51048713	51048713	C	A	exonic	Olfr1375	.	nonsynonymous SNV	Olfr1375:NM_146516:exon1:c.C605A:p.S202Y	11qB1.3
chr11	51048738	51048738	G	T	exonic	Olfr1375	.	synonymous SNV	Olfr1375:NM_146516:exon1:c.G630T:p.V210V	11qB1.3
chr11	51048744	51048744	C	T	exonic	Olfr1375	.	synonymous SNV	Olfr1375:NM_146516:exon1:c.C636T:p.P212P	11qB1.3
chr11	51048786	51048786	G	A	exonic	Olfr1375	.	synonymous SNV	Olfr1375:NM_146516:exon1:c.G678A:p.A226A	11qB1.3
chr11	51048923	51048923	T	A	exonic	Olfr1375	.	nonsynonymous SNV	Olfr1375:NM_146516:exon1:c.T815A:p.V272D	11qB1.3
chr11	51048969	51048969	T	0	exonic	Olfr1375	.	.	.	11qB1.3
chr11	51048969	51048969	T	C	exonic	Olfr1375	.	synonymous SNV	Olfr1375:NM_146516:exon1:c.T861C:p.N287N	11qB1.3
chr11	51049009	51049009	A	T	exonic	Olfr1375	.	nonsynonymous SNV	Olfr1375:NM_146516:exon1:c.A901T:p.T301S	11qB1.3
chr11	51049024	51049024	C	T	exonic	Olfr1375	.	nonsynonymous SNV	Olfr1375:NM_146516:exon1:c.C916T:p.L306F	11qB1.3
chr11	51049032	51049032	A	G	exonic	Olfr1375	.	synonymous SNV	Olfr1375:NM_146516:exon1:c.A924G:p.R308R	11qB1.3
chr11	51049042	51049042	C	T	exonic	Olfr1375	.	nonsynonymous SNV	Olfr1375:NM_146516:exon1:c.C934T:p.P312S	11qB1.3
chr11	51049044	51049044	C	T	exonic	Olfr1375	.	synonymous SNV	Olfr1375:NM_146516:exon1:c.C936T:p.P312P	11qB1.3
chr11	51069378	51069378	G	A	exonic	Zfp354a	.	nonsynonymous SNV	Zfp354a:NM_001326566:exon5:c.G409A:p.V137M,Zfp354a:NM_001347495:exon5:c.G415A:p.V139M,Zfp354a:NM_009329:exon5:c.G412A:p.V138M	11qB1.3
chr11	51069410	51069410	A	G	exonic	Zfp354a	.	synonymous SNV	Zfp354a:NM_001326566:exon5:c.A441G:p.K147K,Zfp354a:NM_001347495:exon5:c.A447G:p.K149K,Zfp354a:NM_009329:exon5:c.A444G:p.K148K	11qB1.3
chr11	51069414	51069414	A	G	exonic	Zfp354a	.	nonsynonymous SNV	Zfp354a:NM_001326566:exon5:c.A445G:p.N149D,Zfp354a:NM_001347495:exon5:c.A451G:p.N151D,Zfp354a:NM_009329:exon5:c.A448G:p.N150D	11qB1.3
chr11	51069439	51069439	G	A	exonic	Zfp354a	.	nonsynonymous SNV	Zfp354a:NM_001326566:exon5:c.G470A:p.R157K,Zfp354a:NM_001347495:exon5:c.G476A:p.R159K,Zfp354a:NM_009329:exon5:c.G473A:p.R158K	11qB1.3
chr11	51069453	51069453	T	C	exonic	Zfp354a	.	nonsynonymous SNV	Zfp354a:NM_001326566:exon5:c.T484C:p.S162P,Zfp354a:NM_001347495:exon5:c.T490C:p.S164P,Zfp354a:NM_009329:exon5:c.T487C:p.S163P	11qB1.3
chr11	51069470	51069470	A	G	exonic	Zfp354a	.	synonymous SNV	Zfp354a:NM_001326566:exon5:c.A501G:p.Q167Q,Zfp354a:NM_001347495:exon5:c.A507G:p.Q169Q,Zfp354a:NM_009329:exon5:c.A504G:p.Q168Q	11qB1.3
chr11	51069492	51069492	T	C	exonic	Zfp354a	.	synonymous SNV	Zfp354a:NM_001326566:exon5:c.T523C:p.L175L,Zfp354a:NM_001347495:exon5:c.T529C:p.L177L,Zfp354a:NM_009329:exon5:c.T526C:p.L176L	11qB1.3
chr11	51070668	51070668	G	A	exonic	Zfp354a	.	nonsynonymous SNV	Zfp354a:NM_001326566:exon5:c.G1699A:p.V567M,Zfp354a:NM_001347495:exon5:c.G1705A:p.V569M,Zfp354a:NM_009329:exon5:c.G1702A:p.V568M	11qB1.3
chr11	51234096	51234096	T	A	exonic	Gm12569	.	nonsynonymous SNV	Gm12569:NM_001378501:exon5:c.T140A:p.L47Q,Gm12569:NM_001378502:exon5:c.T140A:p.L47Q,Gm12569:NM_001378503:exon5:c.T140A:p.L47Q,Gm12569:NM_001378504:exon5:c.T140A:p.L47Q	11qB1.3
chr11	51234235	51234235	C	G	exonic	Gm12569	.	nonsynonymous SNV	Gm12569:NM_001378501:exon5:c.C279G:p.N93K,Gm12569:NM_001378502:exon5:c.C279G:p.N93K,Gm12569:NM_001378503:exon5:c.C279G:p.N93K,Gm12569:NM_001378504:exon5:c.C279G:p.N93K	11qB1.3
chr11	51234248	51234248	C	T	exonic	Gm12569	.	nonsynonymous SNV	Gm12569:NM_001378501:exon5:c.C292T:p.H98Y,Gm12569:NM_001378502:exon5:c.C292T:p.H98Y,Gm12569:NM_001378503:exon5:c.C292T:p.H98Y,Gm12569:NM_001378504:exon5:c.C292T:p.H98Y	11qB1.3
chr11	51234251	51234251	G	A	exonic	Gm12569	.	nonsynonymous SNV	Gm12569:NM_001378501:exon5:c.G295A:p.E99K,Gm12569:NM_001378502:exon5:c.G295A:p.E99K,Gm12569:NM_001378503:exon5:c.G295A:p.E99K,Gm12569:NM_001378504:exon5:c.G295A:p.E99K	11qB1.3
chr11	51234259	51234259	C	G	exonic	Gm12569	.	synonymous SNV	Gm12569:NM_001378501:exon5:c.C303G:p.L101L,Gm12569:NM_001378502:exon5:c.C303G:p.L101L,Gm12569:NM_001378503:exon5:c.C303G:p.L101L,Gm12569:NM_001378504:exon5:c.C303G:p.L101L	11qB1.3
chr11	51234867	51234867	C	T	exonic	Gm12569	.	nonsynonymous SNV	Gm12569:NM_001378501:exon6:c.C616T:p.P206S,Gm12569:NM_001378502:exon6:c.C616T:p.P206S,Gm12569:NM_001378503:exon6:c.C616T:p.P206S,Gm12569:NM_001378504:exon6:c.C616T:p.P206S	11qB1.3
chr11	51557524	51557524	T	C	exonic	Col23a1	.	synonymous SNV	Col23a1:NM_153393:exon9:c.T543C:p.P181P	11qB1.3
chr11	51558458	51558458	C	T	exonic	Col23a1	.	synonymous SNV	Col23a1:NM_153393:exon10:c.C636T:p.G212G	11qB1.3
chr11	51567899	51567899	G	C	exonic	Col23a1	.	nonsynonymous SNV	Col23a1:NM_153393:exon16:c.G862C:p.A288P	11qB1.3
chr11	51593924	51593924	A	G	exonic	Phykpl	.	nonsynonymous SNV	Phykpl:NM_001382821:exon8:c.A710G:p.H237R,Phykpl:NM_028398:exon8:c.A710G:p.H237R	11qB1.3
chr11	51604674	51604674	G	A	exonic	Hnrnpab	.	synonymous SNV	Hnrnpab:NM_001048061:exon4:c.C537T:p.F179F,Hnrnpab:NM_010448:exon4:c.C537T:p.F179F	11qB1.3
chr11	51626751	51626751	T	G	exonic	Rmnd5b	.	synonymous SNV	Rmnd5b:NM_025346:exon6:c.A679C:p.R227R	11qB1.3
chr11	51627943	51627943	T	C	exonic	Rmnd5b	.	synonymous SNV	Rmnd5b:NM_025346:exon3:c.A222G:p.K74K	11qB1.3
chr11	51645473	51645473	G	C	exonic	N4bp3	.	synonymous SNV	N4bp3:NM_145974:exon3:c.C531G:p.G177G	11qB1.3
chr11	51712346	51712346	A	G	exonic	Sec24a	.	synonymous SNV	Sec24a:NM_001290785:exon16:c.T2271C:p.T757T,Sec24a:NM_175255:exon16:c.T2274C:p.T758T	11qB1.3
chr11	51817092	51817092	C	T	exonic	Jade2	.	nonsynonymous SNV	Jade2:NM_199299:exon12:c.G2293A:p.D765N,Jade2:NM_001357588:exon13:c.G2509A:p.D837N	11qB1.3
chr11	51818533	51818533	C	A	exonic	Jade2	.	nonsynonymous SNV	Jade2:NM_199299:exon11:c.G1648T:p.V550L,Jade2:NM_001357588:exon12:c.G1864T:p.V622L	11qB1.3
chr11	51818588	51818588	T	C	exonic	Jade2	.	synonymous SNV	Jade2:NM_199299:exon11:c.A1593G:p.S531S,Jade2:NM_001357588:exon12:c.A1809G:p.S603S	11qB1.3
chr11	51849029	51849029	T	C	exonic	Jade2	.	nonsynonymous SNV	Jade2:NM_199299:exon2:c.A23G:p.Y8C,Jade2:NM_001357588:exon3:c.A239G:p.Y80C	11qB1.3
chr11	52282158	52282158	G	C	exonic	Tcf7	.	synonymous SNV	Tcf7:NM_009331:exon2:c.C60G:p.S20S,Tcf7:NM_001313981:exon3:c.C60G:p.S20S	11qB1.3
chr11	52374340	52374340	C	T	exonic	Vdac1	.	synonymous SNV	Vdac1:NM_001362693:exon2:c.C285T:p.S95S,Vdac1:NM_011694:exon2:c.C39T:p.S13S	11qB1.3
chr11	52374922	52374922	T	C	exonic	Vdac1	.	synonymous SNV	Vdac1:NM_001362693:exon3:c.T318C:p.F106F,Vdac1:NM_011694:exon3:c.T72C:p.F24F	11qB1.3
chr11	52374940	52374940	T	C	exonic	Vdac1	.	synonymous SNV	Vdac1:NM_001362693:exon3:c.T336C:p.D112D,Vdac1:NM_011694:exon3:c.T90C:p.D30D	11qB1.3
chr11	52376692	52376692	G	A	exonic	Vdac1	.	synonymous SNV	Vdac1:NM_001362693:exon5:c.G561A:p.P187P,Vdac1:NM_011694:exon5:c.G315A:p.P105P	11qB1.3
chr11	52396482	52396482	C	T	exonic	9530068E07Rik	.	synonymous SNV	9530068E07Rik:NM_153117:exon1:c.C15T:p.A5A	11qB1.3
chr11	52403347	52403347	C	T	exonic	9530068E07Rik	.	synonymous SNV	9530068E07Rik:NM_153117:exon2:c.C438T:p.Y146Y	11qB1.3
chr11	52403443	52403443	G	C	exonic	9530068E07Rik	.	synonymous SNV	9530068E07Rik:NM_153117:exon2:c.G534C:p.V178V	11qB1.3
chr11	53134053	53134053	G	A	exonic	Fstl4	.	nonsynonymous SNV	Fstl4:NM_177059:exon7:c.G751A:p.E251K	11qB1.3
chr11	53134073	53134073	T	C	exonic	Fstl4	.	synonymous SNV	Fstl4:NM_177059:exon7:c.T771C:p.T257T	11qB1.3
chr11	53437105	53437105	T	C	exonic	Gdf9	.	nonsynonymous SNV	Gdf9:NM_008110:exon2:c.T887C:p.I296T	11qB1.3
chr11	53463367	53463367	C	A	exonic	Shroom1	.	nonsynonymous SNV	Shroom1:NM_001290789:exon2:c.C113A:p.T38K,Shroom1:NM_027917:exon2:c.C113A:p.T38K	11qB1.3
chr11	53586916	53586916	A	G	exonic	Kif3a	.	nonsynonymous SNV	Kif3a:NM_001290805:exon9:c.A1211G:p.K404R,Kif3a:NM_001290806:exon9:c.A1211G:p.K404R,Kif3a:NM_008443:exon9:c.A1211G:p.K404R	11qB1.3
chr11	53598822	53598822	T	C	exonic	Kif3a	.	nonsynonymous SNV	Kif3a:NM_001290805:exon16:c.T2039C:p.M680T,Kif3a:NM_001290806:exon17:c.T2027C:p.M676T,Kif3a:NM_008443:exon17:c.T2048C:p.M683T	11qB1.3
chr11	53632146	53632146	G	C	exonic	Il13	.	synonymous SNV	Il13:NM_008355:exon4:c.C315G:p.P105P	11qB1.3
chr11	53634563	53634563	T	C	exonic	Il13	.	synonymous SNV	Il13:NM_008355:exon1:c.A72G:p.P24P	11qB1.3
chr11	53692299	53692299	T	C	exonic	Rad50	.	synonymous SNV	Rad50:NM_009012:exon9:c.A1266G:p.E422E	11qB1.3
chr11	53698271	53698271	C	A	exonic	Rad50	.	nonsynonymous SNV	Rad50:NM_009012:exon5:c.G599T:p.G200V	11qB1.3
chr11	53720947	53720947	C	T	exonic	Il5	.	synonymous SNV	Il5:NM_010558:exon1:c.C111T:p.S37S	11qB1.3
chr11	53723769	53723769	G	A	exonic	Il5	.	nonsynonymous SNV	Il5:NM_010558:exon3:c.G236A:p.R79H	11qB1.3
chr11	53723993	53723993	A	G	exonic	Il5	.	synonymous SNV	Il5:NM_010558:exon4:c.A381G:p.T127T	11qB1.3
chr11	53953149	53953149	C	T	exonic	Slc22a21	.	synonymous SNV	Slc22a21:NM_001362202:exon7:c.G783A:p.V261V,Slc22a21:NM_019723:exon8:c.G1311A:p.V437V	11qB1.3
chr11	53959349	53959349	T	G	exonic	Slc22a21	.	synonymous SNV	Slc22a21:NM_001362202:exon3:c.A151C:p.R51R,Slc22a21:NM_019723:exon4:c.A679C:p.R227R	11qB1.3
chr11	53983638	53983638	C	T	exonic	Slc22a4	.	nonsynonymous SNV	Slc22a4:NM_001330304:exon9:c.G1106A:p.S369N,Slc22a4:NM_019687:exon10:c.G1634A:p.S545N	11qB1.3
chr11	53983655	53983655	T	C	exonic	Slc22a4	.	synonymous SNV	Slc22a4:NM_001330304:exon9:c.A1089G:p.S363S,Slc22a4:NM_019687:exon10:c.A1617G:p.S539S	11qB1.3
chr11	53983675	53983675	C	A	exonic	Slc22a4	.	nonsynonymous SNV	Slc22a4:NM_001330304:exon9:c.G1069T:p.G357W,Slc22a4:NM_019687:exon10:c.G1597T:p.G533W	11qB1.3
chr11	54055419	54055419	G	C	exonic	Pdlim4	.	synonymous SNV	Pdlim4:NM_019417:exon6:c.C726G:p.L242L	11qB1.3
chr11	54247598	54247598	C	A	exonic	Csf2	.	nonsynonymous SNV	Csf2:NM_009969:exon4:c.G416T:p.G139V	11qB1.3
chr11	54249464	54249464	C	T	exonic	Csf2	.	synonymous SNV	Csf2:NM_009969:exon1:c.G147A:p.T49T	11qB1.3
chr11	54625923	54625923	A	T	exonic	Rapgef6	.	synonymous SNV	Rapgef6:NM_001252497:exon5:c.A564T:p.I188I,Rapgef6:NM_001252498:exon5:c.A564T:p.I188I,Rapgef6:NM_001252494:exon10:c.A1005T:p.I335I,Rapgef6:NM_001252496:exon10:c.A1005T:p.I335I,Rapgef6:NM_175258:exon10:c.A1005T:p.I335I	11qB1.3
chr11	54664084	54664084	T	C	exonic	Rapgef6	.	synonymous SNV	Rapgef6:NM_175258:exon20:c.T2946C:p.D982D,Rapgef6:NM_001252494:exon21:c.T2961C:p.D987D,Rapgef6:NM_001252496:exon21:c.T2961C:p.D987D	11qB1.3
chr11	54853246	54853246	A	G	exonic	Lyrm7	.	synonymous SNV	Lyrm7:NM_001363191:exon2:c.T72C:p.N24N,Lyrm7:NM_029327:exon2:c.T72C:p.N24N	11qB1.3
chr11	54870281	54870281	C	T	exonic	Hint1	.	synonymous SNV	Hint1:NM_008248:exon3:c.C309T:p.D103D	11qB1.3
chr11	54908593	54908593	C	T	exonic	Gpx3	.	unknown	UNKNOWN	11qB1.3
chr11	54917284	54917284	G	A	exonic	Tnip1	.	nonsynonymous SNV	Tnip1:NM_001199276:exon14:c.C1439T:p.A480V,Tnip1:NM_001271455:exon15:c.C1439T:p.A480V,Tnip1:NM_021327:exon15:c.C1598T:p.A533V,Tnip1:NM_001199275:exon16:c.C1598T:p.A533V,Tnip1:NM_001271456:exon16:c.C1598T:p.A533V	11qB1.3
chr11	54918636	54918636	T	C	exonic	Tnip1	.	synonymous SNV	Tnip1:NM_001199276:exon12:c.A1245G:p.L415L,Tnip1:NM_001271455:exon13:c.A1245G:p.L415L,Tnip1:NM_021327:exon13:c.A1404G:p.L468L,Tnip1:NM_001199275:exon14:c.A1404G:p.L468L,Tnip1:NM_001271456:exon14:c.A1404G:p.L468L	11qB1.3
chr11	54926756	54926756	G	A	exonic	Tnip1	.	nonsynonymous SNV	Tnip1:NM_001199276:exon8:c.C764T:p.A255V,Tnip1:NM_001271455:exon9:c.C764T:p.A255V,Tnip1:NM_021327:exon9:c.C923T:p.A308V,Tnip1:NM_001199275:exon10:c.C923T:p.A308V,Tnip1:NM_001271456:exon10:c.C923T:p.A308V	11qB1.3
chr11	54937958	54937958	A	G	exonic	Tnip1	.	nonsynonymous SNV	Tnip1:NM_001199276:exon3:c.T223C:p.S75P,Tnip1:NM_001271455:exon4:c.T223C:p.S75P,Tnip1:NM_021327:exon4:c.T382C:p.S128P,Tnip1:NM_001199275:exon5:c.T382C:p.S128P,Tnip1:NM_001271456:exon5:c.T382C:p.S128P	11qB1.3
chr11	54938009	54938009	C	T	exonic	Tnip1	.	nonsynonymous SNV	Tnip1:NM_001199276:exon3:c.G172A:p.A58T,Tnip1:NM_001271455:exon4:c.G172A:p.A58T,Tnip1:NM_021327:exon4:c.G331A:p.A111T,Tnip1:NM_001199275:exon5:c.G331A:p.A111T,Tnip1:NM_001271456:exon5:c.G331A:p.A111T	11qB1.3
chr11	54940825	54940825	C	G	exonic	Tnip1	.	nonsynonymous SNV	Tnip1:NM_021327:exon2:c.G22C:p.G8R,Tnip1:NM_001199275:exon3:c.G22C:p.G8R,Tnip1:NM_001271456:exon3:c.G22C:p.G8R	11qB1.3
chr11	54985101	54985101	A	G	exonic	Anxa6	.	synonymous SNV	Anxa6:NM_001110211:exon22:c.T1737C:p.D579D,Anxa6:NM_013472:exon23:c.T1755C:p.D585D	11qB1.3
chr11	54992287	54992287	T	C	exonic	Anxa6	.	synonymous SNV	Anxa6:NM_001110211:exon19:c.A1518G:p.T506T,Anxa6:NM_013472:exon19:c.A1518G:p.T506T	11qB1.3
chr11	54994945	54994945	G	A	exonic	Anxa6	.	synonymous SNV	Anxa6:NM_001110211:exon16:c.C1173T:p.T391T,Anxa6:NM_013472:exon16:c.C1173T:p.T391T	11qB1.3
chr11	54996350	54996350	A	G	exonic	Anxa6	.	synonymous SNV	Anxa6:NM_001110211:exon15:c.T1101C:p.A367A,Anxa6:NM_013472:exon15:c.T1101C:p.A367A	11qB1.3
chr11	55005806	55005806	A	G	exonic	Anxa6	.	synonymous SNV	Anxa6:NM_001110211:exon8:c.T525C:p.D175D,Anxa6:NM_013472:exon8:c.T525C:p.D175D	11qB1.3
chr11	55009174	55009174	A	G	exonic	Anxa6	.	synonymous SNV	Anxa6:NM_001110211:exon6:c.T345C:p.L115L,Anxa6:NM_013472:exon6:c.T345C:p.L115L	11qB1.3
chr11	55009197	55009197	C	T	exonic	Anxa6	.	nonsynonymous SNV	Anxa6:NM_001110211:exon6:c.G322A:p.V108I,Anxa6:NM_013472:exon6:c.G322A:p.V108I	11qB1.3
chr11	55011725	55011725	T	C	exonic	Anxa6	.	nonsynonymous SNV	Anxa6:NM_001110211:exon4:c.A182G:p.N61S,Anxa6:NM_013472:exon4:c.A182G:p.N61S	11qB1.3
chr11	55052384	55052384	G	A	exonic	Ccdc69	.	synonymous SNV	Ccdc69:NM_177471:exon5:c.C393T:p.H131H	11qB1.3
chr11	55052420	55052420	T	C	exonic	Ccdc69	.	synonymous SNV	Ccdc69:NM_177471:exon5:c.A357G:p.L119L	11qB1.3
chr11	55055002	55055002	A	G	exonic	Ccdc69	.	synonymous SNV	Ccdc69:NM_177471:exon3:c.T177C:p.D59D	11qB1.3
chr11	55055020	55055020	C	T	exonic	Ccdc69	.	synonymous SNV	Ccdc69:NM_177471:exon3:c.G159A:p.E53E	11qB1.3
chr11	55060494	55060494	T	C	exonic	Ccdc69	.	nonsynonymous SNV	Ccdc69:NM_177471:exon2:c.A100G:p.I34V	11qB1.3
chr11	55108978	55108978	C	T	exonic	Gm2a	.	synonymous SNV	Gm2a:NM_010299:exon3:c.C324T:p.Y108Y	11qB1.3
chr11	55109041	55109041	G	T	exonic	Gm2a	.	synonymous SNV	Gm2a:NM_010299:exon3:c.G387T:p.L129L	11qB1.3
chr11	55109050	55109050	C	T	exonic	Gm2a	.	synonymous SNV	Gm2a:NM_010299:exon3:c.C396T:p.Y132Y	11qB1.3
chr11	55109428	55109428	A	G	exonic	Gm2a	.	synonymous SNV	Gm2a:NM_010299:exon4:c.A477G:p.L159L	11qB1.3
chr11	55125667	55125667	T	C	exonic	Slc36a3	.	synonymous SNV	Slc36a3:NM_172258:exon10:c.A1101G:p.R367R,Slc36a3:NM_001363468:exon11:c.A810G:p.R270R	11qB1.3
chr11	55125718	55125718	G	A	exonic	Slc36a3	.	synonymous SNV	Slc36a3:NM_172258:exon10:c.C1050T:p.A350A,Slc36a3:NM_001363468:exon11:c.C759T:p.A253A	11qB1.3
chr11	55159431	55159431	A	G	exonic	Slc36a2	.	synonymous SNV	Slc36a2:NM_153170:exon10:c.T1350C:p.F450F	11qB1.3
chr11	55159439	55159439	T	C	exonic	Slc36a2	.	nonsynonymous SNV	Slc36a2:NM_153170:exon10:c.A1342G:p.M448V	11qB1.3
chr11	55159475	55159475	C	T	exonic	Slc36a2	.	nonsynonymous SNV	Slc36a2:NM_153170:exon10:c.G1306A:p.V436I	11qB1.3
chr11	55162713	55162713	A	G	exonic	Slc36a2	.	synonymous SNV	Slc36a2:NM_153170:exon9:c.T1098C:p.S366S	11qB1.3
chr11	55162776	55162776	G	A	exonic	Slc36a2	.	synonymous SNV	Slc36a2:NM_153170:exon9:c.C1035T:p.I345I	11qB1.3
chr11	55162779	55162779	A	G	exonic	Slc36a2	.	synonymous SNV	Slc36a2:NM_153170:exon9:c.T1032C:p.G344G	11qB1.3
chr11	55179367	55179367	A	G	exonic	Slc36a2	.	nonsynonymous SNV	Slc36a2:NM_153170:exon4:c.T383C:p.F128S	11qB1.3
chr11	55180739	55180739	G	A	exonic	Slc36a2	.	synonymous SNV	Slc36a2:NM_153170:exon3:c.C297T:p.I99I	11qB1.3
chr11	55220418	55220418	T	C	exonic	Slc36a1	.	synonymous SNV	Slc36a1:NM_153139:exon5:c.T363C:p.Y121Y	11qB1.3
chr11	55223658	55223658	G	A	exonic	Slc36a1	.	synonymous SNV	Slc36a1:NM_153139:exon7:c.G561A:p.P187P	11qB1.3
chr11	55223772	55223772	C	T	exonic	Slc36a1	.	synonymous SNV	Slc36a1:NM_153139:exon7:c.C675T:p.I225I	11qB1.3
chr11	55226016	55226016	T	C	exonic	Slc36a1	.	synonymous SNV	Slc36a1:NM_153139:exon9:c.T870C:p.I290I	11qB1.3
chr11	55226038	55226038	A	G	exonic	Slc36a1	.	nonsynonymous SNV	Slc36a1:NM_153139:exon9:c.A892G:p.I298V	11qB1.3
chr11	55252209	55252209	A	G	exonic	Fat2	.	synonymous SNV	Fat2:NM_001029988:exon23:c.T12813C:p.N4271N	11qB1.3
chr11	55252302	55252302	G	A	exonic	Fat2	.	synonymous SNV	Fat2:NM_001029988:exon23:c.C12720T:p.P4240P	11qB1.3
chr11	55256236	55256236	G	A	exonic	Fat2	.	nonsynonymous SNV	Fat2:NM_001029988:exon21:c.C11933T:p.P3978L	11qB1.3
chr11	55262444	55262444	G	A	exonic	Fat2	.	synonymous SNV	Fat2:NM_001029988:exon18:c.C10941T:p.S3647S	11qB1.3
chr11	55262456	55262456	C	T	exonic	Fat2	.	synonymous SNV	Fat2:NM_001029988:exon18:c.G10929A:p.E3643E	11qB1.3
chr11	55262525	55262525	A	G	exonic	Fat2	.	synonymous SNV	Fat2:NM_001029988:exon18:c.T10860C:p.H3620H	11qB1.3
chr11	55262531	55262531	A	G	exonic	Fat2	.	synonymous SNV	Fat2:NM_001029988:exon18:c.T10854C:p.H3618H	11qB1.3
chr11	55262707	55262707	G	T	exonic	Fat2	.	synonymous SNV	Fat2:NM_001029988:exon18:c.C10678A:p.R3560R	11qB1.3
chr11	55262762	55262762	C	T	exonic	Fat2	.	synonymous SNV	Fat2:NM_001029988:exon18:c.G10623A:p.T3541T	11qB1.3
chr11	55262818	55262818	T	C	exonic	Fat2	.	nonsynonymous SNV	Fat2:NM_001029988:exon18:c.A10567G:p.I3523V	11qB1.3
chr11	55262819	55262819	G	A	exonic	Fat2	.	synonymous SNV	Fat2:NM_001029988:exon18:c.C10566T:p.H3522H	11qB1.3
chr11	55262822	55262822	T	C	exonic	Fat2	.	synonymous SNV	Fat2:NM_001029988:exon18:c.A10563G:p.V3521V	11qB1.3
chr11	55262834	55262834	T	C	exonic	Fat2	.	synonymous SNV	Fat2:NM_001029988:exon18:c.A10551G:p.T3517T	11qB1.3
chr11	55265946	55265946	T	C	exonic	Fat2	.	synonymous SNV	Fat2:NM_001029988:exon17:c.A10428G:p.V3476V	11qB1.3
chr11	55265970	55265970	A	G	exonic	Fat2	.	synonymous SNV	Fat2:NM_001029988:exon17:c.T10404C:p.I3468I	11qB1.3
chr11	55265979	55265979	A	G	exonic	Fat2	.	synonymous SNV	Fat2:NM_001029988:exon17:c.T10395C:p.F3465F	11qB1.3
chr11	55269398	55269398	A	G	exonic	Fat2	.	synonymous SNV	Fat2:NM_001029988:exon14:c.T9888C:p.S3296S	11qB1.3
chr11	55273053	55273053	G	A	exonic	Fat2	.	synonymous SNV	Fat2:NM_001029988:exon12:c.C9375T:p.F3125F	11qB1.3
chr11	55273140	55273140	T	C	exonic	Fat2	.	synonymous SNV	Fat2:NM_001029988:exon12:c.A9288G:p.S3096S	11qB1.3
chr11	55273211	55273211	A	T	exonic	Fat2	.	nonsynonymous SNV	Fat2:NM_001029988:exon12:c.T9217A:p.S3073T	11qB1.3
chr11	55281186	55281186	G	A	exonic	Fat2	.	synonymous SNV	Fat2:NM_001029988:exon9:c.C8700T:p.D2900D	11qB1.3
chr11	55281360	55281360	A	G	exonic	Fat2	.	synonymous SNV	Fat2:NM_001029988:exon9:c.T8526C:p.P2842P	11qB1.3
chr11	55281720	55281720	C	T	exonic	Fat2	.	synonymous SNV	Fat2:NM_001029988:exon9:c.G8166A:p.P2722P	11qB1.3
chr11	55281963	55281963	G	A	exonic	Fat2	.	synonymous SNV	Fat2:NM_001029988:exon9:c.C7923T:p.T2641T	11qB1.3
chr11	55282077	55282077	G	A	exonic	Fat2	.	synonymous SNV	Fat2:NM_001029988:exon9:c.C7809T:p.P2603P	11qB1.3
chr11	55282083	55282083	A	G	exonic	Fat2	.	synonymous SNV	Fat2:NM_001029988:exon9:c.T7803C:p.D2601D	11qB1.3
chr11	55283232	55283232	T	G	exonic	Fat2	.	synonymous SNV	Fat2:NM_001029988:exon9:c.A6654C:p.T2218T	11qB1.3
chr11	55283450	55283450	G	T	exonic	Fat2	.	synonymous SNV	Fat2:NM_001029988:exon9:c.C6436A:p.R2146R	11qB1.3
chr11	55284389	55284389	T	A	exonic	Fat2	.	nonsynonymous SNV	Fat2:NM_001029988:exon9:c.A5497T:p.T1833S	11qB1.3
chr11	55284648	55284648	A	G	exonic	Fat2	.	synonymous SNV	Fat2:NM_001029988:exon9:c.T5238C:p.V1746V	11qB1.3
chr11	55284852	55284852	T	C	exonic	Fat2	.	synonymous SNV	Fat2:NM_001029988:exon9:c.A5034G:p.P1678P	11qB1.3
chr11	55284969	55284969	C	T	exonic	Fat2	.	synonymous SNV	Fat2:NM_001029988:exon9:c.G4917A:p.Q1639Q	11qB1.3
chr11	55284990	55284990	C	T	exonic	Fat2	.	synonymous SNV	Fat2:NM_001029988:exon9:c.G4896A:p.A1632A	11qB1.3
chr11	55287689	55287689	T	G	exonic	Fat2	.	nonsynonymous SNV	Fat2:NM_001029988:exon7:c.A4544C:p.H1515P	11qB1.3
chr11	55287697	55287697	C	T	exonic	Fat2	.	synonymous SNV	Fat2:NM_001029988:exon7:c.G4536A:p.L1512L	11qB1.3
chr11	55296368	55296368	A	G	exonic	Fat2	.	synonymous SNV	Fat2:NM_001029988:exon4:c.T3651C:p.N1217N	11qB1.3
chr11	55303738	55303738	T	C	exonic	Fat2	.	synonymous SNV	Fat2:NM_001029988:exon2:c.A3474G:p.Q1158Q	11qB1.3
chr11	55303831	55303831	A	G	exonic	Fat2	.	synonymous SNV	Fat2:NM_001029988:exon2:c.T3381C:p.V1127V	11qB1.3
chr11	55309034	55309034	T	A	exonic	Fat2	.	synonymous SNV	Fat2:NM_001029988:exon1:c.A3213T:p.L1071L	11qB1.3
chr11	55309230	55309230	C	T	exonic	Fat2	.	nonsynonymous SNV	Fat2:NM_001029988:exon1:c.G3017A:p.R1006K	11qB1.3
chr11	55309394	55309394	A	G	exonic	Fat2	.	synonymous SNV	Fat2:NM_001029988:exon1:c.T2853C:p.D951D	11qB1.3
chr11	55309940	55309940	A	G	exonic	Fat2	.	synonymous SNV	Fat2:NM_001029988:exon1:c.T2307C:p.T769T	11qB1.3
chr11	55309952	55309952	A	G	exonic	Fat2	.	synonymous SNV	Fat2:NM_001029988:exon1:c.T2295C:p.I765I	11qB1.3
chr11	55309997	55309997	T	C	exonic	Fat2	.	synonymous SNV	Fat2:NM_001029988:exon1:c.A2250G:p.L750L	11qB1.3
chr11	55310303	55310303	G	A	exonic	Fat2	.	synonymous SNV	Fat2:NM_001029988:exon1:c.C1944T:p.Y648Y	11qB1.3
chr11	55310345	55310345	A	G	exonic	Fat2	.	synonymous SNV	Fat2:NM_001029988:exon1:c.T1902C:p.T634T	11qB1.3
chr11	55310363	55310363	G	A	exonic	Fat2	.	synonymous SNV	Fat2:NM_001029988:exon1:c.C1884T:p.L628L	11qB1.3
chr11	55310431	55310431	C	T	exonic	Fat2	.	nonsynonymous SNV	Fat2:NM_001029988:exon1:c.G1816A:p.E606K	11qB1.3
chr11	55310501	55310501	C	G	exonic	Fat2	.	synonymous SNV	Fat2:NM_001029988:exon1:c.G1746C:p.S582S	11qB1.3
chr11	55310681	55310681	G	A	exonic	Fat2	.	synonymous SNV	Fat2:NM_001029988:exon1:c.C1566T:p.Y522Y	11qB1.3
chr11	55311211	55311211	T	C	exonic	Fat2	.	nonsynonymous SNV	Fat2:NM_001029988:exon1:c.A1036G:p.I346V	11qB1.3
chr11	55311212	55311212	G	C	exonic	Fat2	.	synonymous SNV	Fat2:NM_001029988:exon1:c.C1035G:p.S345S	11qB1.3
chr11	55311434	55311434	A	G	exonic	Fat2	.	synonymous SNV	Fat2:NM_001029988:exon1:c.T813C:p.I271I	11qB1.3
chr11	55398676	55398676	A	G	exonic	Sparc	.	synonymous SNV	Sparc:NM_001290817:exon8:c.T600C:p.N200N,Sparc:NM_009242:exon8:c.T603C:p.N201N	11qB1.3
chr11	55485676	55485676	C	T	exonic	G3bp1	.	synonymous SNV	G3bp1:NM_013716:exon2:c.C33T:p.V11V	11qB1.3
chr11	55485706	55485706	T	C	exonic	G3bp1	.	synonymous SNV	G3bp1:NM_013716:exon2:c.T63C:p.T21T	11qB1.3
chr11	55485731	55485731	T	C	exonic	G3bp1	.	synonymous SNV	G3bp1:NM_013716:exon2:c.T88C:p.L30L	11qB1.3
chr11	55495298	55495298	A	G	exonic	G3bp1	.	synonymous SNV	G3bp1:NM_013716:exon7:c.A582G:p.E194E	11qB1.3
chr11	55514849	55514849	A	G	exonic	Glra1	.	synonymous SNV	Glra1:NM_001290821:exon9:c.T1338C:p.Y446Y,Glra1:NM_020492:exon9:c.T1314C:p.Y438Y	11qB1.3
chr11	55521009	55521009	A	G	exonic	Glra1	.	synonymous SNV	Glra1:NM_001290821:exon8:c.T972C:p.S324S,Glra1:NM_020492:exon8:c.T972C:p.S324S	11qB1.3
chr11	55532357	55532357	G	A	exonic	Glra1	.	synonymous SNV	Glra1:NM_001290821:exon6:c.C624T:p.D208D,Glra1:NM_020492:exon6:c.C624T:p.D208D	11qB1.3
chr11	55536324	55536324	G	A	exonic	Glra1	.	synonymous SNV	Glra1:NM_001290821:exon4:c.C433T:p.L145L,Glra1:NM_020492:exon4:c.C433T:p.L145L	11qB1.3
chr11	55536405	55536405	A	G	exonic	Glra1	.	synonymous SNV	Glra1:NM_001290821:exon4:c.T352C:p.L118L,Glra1:NM_020492:exon4:c.T352C:p.L118L	11qB1.3
chr11	55566215	55566215	T	G	exonic	Glra1	.	synonymous SNV	Glra1:NM_001290821:exon3:c.A246C:p.T82T,Glra1:NM_020492:exon3:c.A246C:p.T82T	11qB1.3
chr11	55566236	55566236	A	G	exonic	Glra1	.	synonymous SNV	Glra1:NM_001290821:exon3:c.T225C:p.S75S,Glra1:NM_020492:exon3:c.T225C:p.S75S	11qB1.3
chr11	56029580	56029580	T	G	exonic	Nmur2	.	synonymous SNV	Nmur2:NM_153079:exon3:c.A838C:p.R280R	11qB1.3
chr11	56040278	56040278	T	C	exonic	Nmur2	.	nonsynonymous SNV	Nmur2:NM_153079:exon1:c.A606G:p.I202M	11qB1.3
chr11	56040316	56040316	C	T	exonic	Nmur2	.	nonsynonymous SNV	Nmur2:NM_153079:exon1:c.G568A:p.V190M	11qB1.3
chr11	56040317	56040317	A	G	exonic	Nmur2	.	synonymous SNV	Nmur2:NM_153079:exon1:c.T567C:p.S189S	11qB1.3
chr11	56040686	56040686	T	C	exonic	Nmur2	.	synonymous SNV	Nmur2:NM_153079:exon1:c.A198G:p.Q66Q	11qB1.3
chr11	61344440	61344440	T	G	exonic	Slc47a1	.	nonsynonymous SNV	Slc47a1:NM_026183:exon17:c.A1566C:p.Q522H	11qB2
chr11	63073481	63073481	T	C	exonic	Tekt3	.	synonymous SNV	Tekt3:NM_027660:exon3:c.T636C:p.H212H	11qB3
chr11	63094690	63094690	T	G	exonic	Tekt3	.	nonsynonymous SNV	Tekt3:NM_027660:exon8:c.T1321G:p.S441A	11qB3
chr11	63094692	63094692	G	A	exonic	Tekt3	.	synonymous SNV	Tekt3:NM_027660:exon8:c.G1323A:p.S441S	11qB3
chr11	63094702	63094702	T	C	exonic	Tekt3	.	synonymous SNV	Tekt3:NM_027660:exon8:c.T1333C:p.L445L	11qB3
chr11	63094710	63094710	C	G	exonic	Tekt3	.	synonymous SNV	Tekt3:NM_027660:exon8:c.C1341G:p.S447S	11qB3
chr11	63094711	63094711	T	C	exonic	Tekt3	.	synonymous SNV	Tekt3:NM_027660:exon8:c.T1342C:p.L448L	11qB3
chr11	63094715	63094715	C	T	exonic	Tekt3	.	nonsynonymous SNV	Tekt3:NM_027660:exon8:c.C1346T:p.A449V	11qB3
chr11	63094719	63094719	T	C	exonic	Tekt3	.	synonymous SNV	Tekt3:NM_027660:exon8:c.T1350C:p.H450H	11qB3
chr11	63094721	63094721	C	T	exonic	Tekt3	.	nonsynonymous SNV	Tekt3:NM_027660:exon8:c.C1352T:p.T451I	11qB3
chr11	69588520	69588520	C	G	exonic	Trp53	.	nonsynonymous SNV	Trp53:NM_001127233:exon5:c.C523G:p.H175D,Trp53:NM_011640:exon5:c.C523G:p.H175D	11qB3
chr11	69813671	69813671	G	A	exonic	Gm39566	.	nonsynonymous SNV	Gm39566:NM_001378260:exon3:c.C1202T:p.T401I	11qB3
chr11	69826746	69826746	A	C	exonic	Nlgn2	.	synonymous SNV	Nlgn2:NM_198862:exon6:c.T1632G:p.T544T,Nlgn2:NM_001364137:exon7:c.T1632G:p.T544T	11qB3
chr11	69826767	69826767	A	G	exonic	Nlgn2	.	synonymous SNV	Nlgn2:NM_198862:exon6:c.T1611C:p.Y537Y,Nlgn2:NM_001364137:exon7:c.T1611C:p.Y537Y	11qB3
chr11	69826779	69826779	T	G	exonic	Nlgn2	.	synonymous SNV	Nlgn2:NM_198862:exon6:c.A1599C:p.V533V,Nlgn2:NM_001364137:exon7:c.A1599C:p.V533V	11qB3
chr11	69826782	69826782	T	G	exonic	Nlgn2	.	synonymous SNV	Nlgn2:NM_198862:exon6:c.A1596C:p.A532A,Nlgn2:NM_001364137:exon7:c.A1596C:p.A532A	11qB3
chr11	69826797	69826797	A	G	exonic	Nlgn2	.	synonymous SNV	Nlgn2:NM_198862:exon6:c.T1581C:p.D527D,Nlgn2:NM_001364137:exon7:c.T1581C:p.D527D	11qB3
chr11	94363796	94363796	T	C	exonic	Abcc3	.	synonymous SNV	Abcc3:NM_001363187:exon16:c.A1962G:p.A654A,Abcc3:NM_001363189:exon16:c.A1962G:p.A654A,Abcc3:NM_029600:exon16:c.A1962G:p.A654A	11qD
chr11	95014372	95014372	C	T	exonic	Samd14	.	synonymous SNV	Samd14:NM_001364135:exon2:c.C9T:p.S3S,Samd14:NM_146025:exon2:c.C9T:p.S3S	11qD
chr11	95014390	95014390	T	C	exonic	Samd14	.	synonymous SNV	Samd14:NM_001364135:exon2:c.T27C:p.P9P,Samd14:NM_146025:exon2:c.T27C:p.P9P	11qD
chr11	98690526	98690526	T	G	exonic	Psmd3	.	synonymous SNV	Psmd3:NM_009439:exon5:c.T738G:p.L246L	11qD
chr11	110292163	110292163	A	C	exonic	Abca5	.	nonsynonymous SNV	Abca5:NM_147219:exon23:c.T3067G:p.F1023V	11qE1
chr12	19406819	19406819	G	A	exonic	Gm5784	.	nonsynonymous SNV	Gm5784:NM_001384145:exon4:c.G986A:p.C329Y	12qA1.2
chr12	24215381	24215381	G	T	exonic	Gm21297	.	nonsynonymous SNV	Gm21297:NM_001384261:exon4:c.C892A:p.H298N	12qA1.3
chr12	24215436	24215436	C	A	exonic	Gm21297	.	synonymous SNV	Gm21297:NM_001384261:exon4:c.G837T:p.T279T	12qA1.3
chr12	24215467	24215467	C	A	exonic	Gm21297	.	nonsynonymous SNV	Gm21297:NM_001384261:exon4:c.G806T:p.S269I	12qA1.3
chr12	81988005	81988005	G	C	exonic	Pcnx	.	nonsynonymous SNV	Pcnx:NM_018814:exon30:c.G5560C:p.V1854L	12qD1
chr12	103325472	103325472	G	C	exonic	Asb2	.	nonsynonymous SNV	Asb2:NM_001374764:exon6:c.C1051G:p.L351V,Asb2:NM_023049:exon8:c.C1195G:p.L399V	12qE
chr12	112768441	112768441	C	G	exonic	Pld4	.	stopgain	Pld4:NM_178911:exon11:c.C1331G:p.S444X	12qF1
chr12	119173301	119173301	C	G	exonic	Itgb8	.	synonymous SNV	Itgb8:NM_177290:exon9:c.G1266C:p.V422V	12qF2
chr13	12796849	12796849	T	C	exonic	Prl2c3;Prl2c4	.	synonymous SNV	Prl2c3:NM_011118:exon2:c.A189G:p.S63S,Prl2c4:NM_011954:exon2:c.A189G:p.S63S	13qA1
chr13	13635802	13635802	T	G	exonic	Lyst	.	nonsynonymous SNV	Lyst:NM_010748:exon5:c.T2056G:p.L686V	13qA1
chr13	22524455	22524455	G	C	exonic	Vmn1r203	.	nonsynonymous SNV	Vmn1r203:NM_134236:exon1:c.G405C:p.W135C	13qA3.1
chr13	22852097	22852097	C	T	exonic	Vmn1r211	.	synonymous SNV	Vmn1r211:NM_134243:exon1:c.G399A:p.L133L	13qA3.1
chr13	33006641	33006641	G	A	exonic	Serpinb9	.	synonymous SNV	Serpinb9:NM_009256:exon2:c.G99A:p.A33A	13qA3.2
chr13	33029486	33029486	G	A	exonic	Serpinb9b	.	nonsynonymous SNV	Serpinb9b:NM_011452:exon2:c.G25A:p.G9S	13qA3.2
chr13	33038067	33038067	T	C	exonic	Serpinb9b	.	synonymous SNV	Serpinb9b:NM_011452:exon6:c.T663C:p.Y221Y	13qA3.2
chr13	33038118	33038118	C	T	exonic	Serpinb9b	.	synonymous SNV	Serpinb9b:NM_011452:exon6:c.C714T:p.D238D	13qA3.2
chr13	33156465	33156465	G	A	exonic	Serpinb9c	.	nonsynonymous SNV	Serpinb9c:NM_001164524:exon4:c.C352T:p.P118S,Serpinb9c:NM_011453:exon4:c.C268T:p.P90S	13qA3.3
chr13	34050337	34050337	G	A	exonic	Bphl	.	synonymous SNV	Bphl:NM_026512:exon4:c.G435A:p.A145A	13qA3.3
chr13	34074654	34074654	C	T	exonic	Tubb2a	.	synonymous SNV	Tubb2a:NM_009450:exon4:c.G1152A:p.Q384Q	13qA3.3
chr13	34197822	34197822	A	G	exonic	Slc22a23	.	synonymous SNV	Slc22a23:NM_001033167:exon6:c.T1278C:p.I426I,Slc22a23:NM_001382849:exon6:c.T1278C:p.I426I	13qA3.3
chr13	34959922	34959922	T	C	exonic	Eci3	.	synonymous SNV	Eci3:NM_026947:exon3:c.A219G:p.T73T	13qA3.3
chr13	34990235	34990235	A	G	exonic	Eci2	.	synonymous SNV	Eci2:NM_001110331:exon4:c.T441C:p.G147G,Eci2:NM_011868:exon4:c.T342C:p.G114G	13qA3.3
chr13	34990272	34990272	C	T	exonic	Eci2	.	nonsynonymous SNV	Eci2:NM_001110331:exon4:c.G404A:p.R135Q,Eci2:NM_011868:exon4:c.G305A:p.R102Q	13qA3.3
chr13	35856892	35856892	G	A	exonic	Cdyl	.	synonymous SNV	Cdyl:NM_001378942:exon2:c.G216A:p.S72S,Cdyl:NM_001123386:exon3:c.G921A:p.S307S,Cdyl:NM_001378941:exon4:c.G996A:p.S332S,Cdyl:NM_009881:exon6:c.G1068A:p.S356S	13qA3.3
chr13	35858090	35858090	G	A	exonic	Cdyl	.	synonymous SNV	Cdyl:NM_001378942:exon3:c.G258A:p.V86V,Cdyl:NM_001123386:exon4:c.G963A:p.V321V,Cdyl:NM_001378941:exon5:c.G1038A:p.V346V,Cdyl:NM_009881:exon7:c.G1110A:p.V370V	13qA3.3
chr13	35896796	35896796	A	G	exonic	Rpp40	.	synonymous SNV	Rpp40:NM_145938:exon8:c.T1023C:p.F341F	13qA3.3
chr13	35896856	35896856	G	A	exonic	Rpp40	.	synonymous SNV	Rpp40:NM_145938:exon8:c.C963T:p.P321P	13qA3.3
chr13	35901311	35901311	G	T	exonic	Rpp40	.	nonsynonymous SNV	Rpp40:NM_145938:exon5:c.C554A:p.P185H	13qA3.3
chr13	35902065	35902065	G	A	exonic	Rpp40	.	synonymous SNV	Rpp40:NM_145938:exon4:c.C381T:p.T127T	13qA3.3
chr13	35902089	35902089	T	C	exonic	Rpp40	.	synonymous SNV	Rpp40:NM_145938:exon4:c.A357G:p.L119L	13qA3.3
chr13	35904444	35904444	C	T	exonic	Rpp40	.	synonymous SNV	Rpp40:NM_145938:exon2:c.G243A:p.E81E	13qA3.3
chr13	35904514	35904514	C	T	exonic	Rpp40	.	nonsynonymous SNV	Rpp40:NM_145938:exon2:c.G173A:p.S58N	13qA3.3
chr13	35904534	35904534	A	C	exonic	Rpp40	.	synonymous SNV	Rpp40:NM_145938:exon2:c.T153G:p.L51L	13qA3.3
chr13	35969294	35969294	C	T	exonic	Ppp1r3g	.	synonymous SNV	Ppp1r3g:NM_029628:exon2:c.C696T:p.C232C	13qA3.3
chr13	35969450	35969450	C	G	exonic	Ppp1r3g	.	synonymous SNV	Ppp1r3g:NM_029628:exon2:c.C852G:p.P284P	13qA3.3
chr13	36537340	36537340	C	G	exonic	Fars2	.	synonymous SNV	Fars2:NM_001039189:exon6:c.C561G:p.R187R,Fars2:NM_024274:exon7:c.C1257G:p.R419R	13qA3.3
chr13	37930403	37930403	A	G	exonic	Rreb1	.	synonymous SNV	Rreb1:NM_001177869:exon9:c.A1737G:p.Q579Q,Rreb1:NM_001039188:exon10:c.A1737G:p.Q579Q,Rreb1:NM_001177868:exon10:c.A1737G:p.Q579Q,Rreb1:NM_026830:exon10:c.A1737G:p.Q579Q	13qA3.3
chr13	37987559	37987559	T	C	exonic	Ssr1	.	synonymous SNV	Ssr1:NM_001360842:exon4:c.A501G:p.R167R,Ssr1:NM_025965:exon4:c.A501G:p.R167R	13qA3.3
chr13	38025436	38025436	G	C	exonic	Cage1	.	nonsynonymous SNV	Cage1:NM_027724:exon4:c.C564G:p.F188L	13qA3.3
chr13	38025454	38025454	C	G	exonic	Cage1	.	synonymous SNV	Cage1:NM_027724:exon4:c.G546C:p.P182P	13qA3.3
chr13	38025487	38025487	T	C	exonic	Cage1	.	synonymous SNV	Cage1:NM_027724:exon4:c.A513G:p.L171L	13qA3.3
chr13	38025616	38025616	T	C	exonic	Cage1	.	synonymous SNV	Cage1:NM_027724:exon4:c.A384G:p.V128V	13qA3.3
chr13	38025622	38025622	G	A	exonic	Cage1	.	synonymous SNV	Cage1:NM_027724:exon4:c.C378T:p.S126S	13qA3.3
chr13	38025749	38025749	C	T	exonic	Cage1	.	nonsynonymous SNV	Cage1:NM_027724:exon4:c.G251A:p.R84K	13qA3.3
chr13	38028137	38028137	C	T	exonic	Cage1	.	synonymous SNV	Cage1:NM_027724:exon3:c.G162A:p.E54E	13qA3.3
chr13	38028146	38028146	C	T	exonic	Cage1	.	synonymous SNV	Cage1:NM_027724:exon3:c.G153A:p.T51T	13qA3.3
chr13	38028154	38028154	T	C	exonic	Cage1	.	nonsynonymous SNV	Cage1:NM_027724:exon3:c.A145G:p.T49A	13qA3.3
chr13	38028166	38028166	C	T	exonic	Cage1	.	nonsynonymous SNV	Cage1:NM_027724:exon3:c.G133A:p.G45R	13qA3.3
chr13	38028173	38028173	C	T	exonic	Cage1	.	synonymous SNV	Cage1:NM_027724:exon3:c.G126A:p.V42V	13qA3.3
chr13	38050904	38050904	C	T	exonic	Riok1	.	synonymous SNV	Riok1:NM_024242:exon10:c.C948T:p.D316D	13qA3.3
chr13	38060077	38060077	T	C	exonic	Riok1	.	synonymous SNV	Riok1:NM_024242:exon16:c.T1578C:p.P526P	13qA3.3
chr13	38060081	38060081	A	G	exonic	Riok1	.	nonsynonymous SNV	Riok1:NM_024242:exon16:c.A1582G:p.I528V	13qA3.3
chr13	38168672	38168672	A	G	exonic	Dsp	.	synonymous SNV	Dsp:NM_023842:exon4:c.A525G:p.R175R	13qA3.3
chr13	38185654	38185654	A	G	exonic	Dsp	.	synonymous SNV	Dsp:NM_023842:exon17:c.A2415G:p.E805E	13qA3.3
chr13	38191736	38191736	A	G	exonic	Dsp	.	nonsynonymous SNV	Dsp:NM_023842:exon23:c.A3496G:p.S1166G	13qA3.3
chr13	38193004	38193004	G	A	exonic	Dsp	.	synonymous SNV	Dsp:NM_023842:exon23:c.G4764A:p.E1588E	13qA3.3
chr13	38193103	38193103	C	T	exonic	Dsp	.	synonymous SNV	Dsp:NM_023842:exon23:c.C4863T:p.A1621A	13qA3.3
chr13	38196576	38196576	A	T	exonic	Dsp	.	synonymous SNV	Dsp:NM_023842:exon24:c.A7296T:p.T2432T	13qA3.3
chr13	38196871	38196871	T	C	exonic	Dsp	.	synonymous SNV	Dsp:NM_023842:exon24:c.T7591C:p.L2531L	13qA3.3
chr13	38197164	38197164	A	G	exonic	Dsp	.	synonymous SNV	Dsp:NM_023842:exon24:c.A7884G:p.S2628S	13qA3.3
chr13	38197470	38197470	T	G	exonic	Dsp	.	synonymous SNV	Dsp:NM_023842:exon24:c.T8190G:p.L2730L	13qA3.3
chr13	40004052	40004052	A	G	exonic	Ofcc1	.	nonsynonymous SNV	Ofcc1:NM_172143:exon18:c.T2669C:p.I890T	13qA3.3
chr13	40142790	40142790	C	T	exonic	Ofcc1	.	nonsynonymous SNV	Ofcc1:NM_172143:exon12:c.G1567A:p.V523M	13qA3.3
chr13	40280532	40280532	G	T	exonic	Ofcc1	.	nonsynonymous SNV	Ofcc1:NM_172143:exon3:c.C96A:p.D32E	13qA3.3
chr13	40721291	40721291	G	A	exonic	Tfap2a	.	synonymous SNV	Tfap2a:NM_001122948:exon5:c.C843T:p.T281T,Tfap2a:NM_011547:exon5:c.C867T:p.T289T,Tfap2a:NM_001301674:exon6:c.C867T:p.T289T	13qA3.3
chr13	40860764	40860764	A	C	exonic	Gcnt2	.	nonsynonymous SNV	Gcnt2:NM_023887:exon1:c.A410C:p.E137A	13qA3.3
chr13	40860852	40860852	A	G	exonic	Gcnt2	.	synonymous SNV	Gcnt2:NM_023887:exon1:c.A498G:p.Q166Q	13qA3.3
chr13	41102959	41102959	A	G	exonic	Gcm2	.	nonsynonymous SNV	Gcm2:NM_008104:exon5:c.T1313C:p.V438A	13qA3.3
chr13	41103074	41103074	C	T	exonic	Gcm2	.	nonsynonymous SNV	Gcm2:NM_008104:exon5:c.G1198A:p.G400S	13qA3.3
chr13	41103087	41103087	A	G	exonic	Gcm2	.	synonymous SNV	Gcm2:NM_008104:exon5:c.T1185C:p.P395P	13qA3.3
chr13	41103099	41103099	G	A	exonic	Gcm2	.	synonymous SNV	Gcm2:NM_008104:exon5:c.C1173T:p.A391A	13qA3.3
chr13	41103145	41103145	C	G	exonic	Gcm2	.	nonsynonymous SNV	Gcm2:NM_008104:exon5:c.G1127C:p.S376T	13qA3.3
chr13	41103202	41103202	A	G	exonic	Gcm2	.	nonsynonymous SNV	Gcm2:NM_008104:exon5:c.T1070C:p.L357S	13qA3.3
chr13	41103382	41103382	T	A	exonic	Gcm2	.	nonsynonymous SNV	Gcm2:NM_008104:exon5:c.A890T:p.E297V	13qA3.3
chr13	41104579	41104579	C	T	exonic	Gcm2	.	nonsynonymous SNV	Gcm2:NM_008104:exon4:c.G572A:p.G191E	13qA3.3
chr13	41105498	41105498	T	C	exonic	Gcm2	.	synonymous SNV	Gcm2:NM_008104:exon3:c.A369G:p.S123S	13qA3.3
chr13	41118027	41118027	T	C	exonic	Sycp2l	.	nonsynonymous SNV	Sycp2l:NM_001324525:exon1:c.T17C:p.I6T	13qA3.3
chr13	53117204	53117204	C	T	exonic	Ror2	.	nonsynonymous SNV	Ror2:NM_013846:exon7:c.G1114A:p.V372M	13qB1
chr13	55012536	55012536	A	C	exonic	Hk3	.	nonsynonymous SNV	Hk3:NM_001206392:exon8:c.T805G:p.L269V,Hk3:NM_001033245:exon9:c.T970G:p.L324V,Hk3:NM_001206390:exon9:c.T970G:p.L324V,Hk3:NM_001206391:exon9:c.T970G:p.L324V	13qB1
chr13	65690486	65690486	C	T	exonic	Gm53057	.	nonsynonymous SNV	Gm53057:NM_001384230:exon4:c.G1135A:p.G379R	13qB3
chr13	65690604	65690604	G	A	exonic	Gm53057	.	synonymous SNV	Gm53057:NM_001384230:exon4:c.C1017T:p.S339S	13qB3
chr13	65690656	65690656	T	G	exonic	Gm53057	.	nonsynonymous SNV	Gm53057:NM_001384230:exon4:c.A965C:p.N322T	13qB3
chr13	65690874	65690874	A	C	exonic	Gm53057	.	synonymous SNV	Gm53057:NM_001384230:exon4:c.T747G:p.G249G	13qB3
chr13	66431174	66431174	C	T	exonic	2410141K09Rik	.	nonsynonymous SNV	2410141K09Rik:NM_001290196:exon4:c.G1249A:p.G417R	13qB3
chr13	66431186	66431186	A	C	exonic	2410141K09Rik	.	nonsynonymous SNV	2410141K09Rik:NM_001290196:exon4:c.T1237G:p.C413G	13qB3
chr13	66431244	66431244	T	A	exonic	2410141K09Rik	.	synonymous SNV	2410141K09Rik:NM_001290196:exon4:c.A1179T:p.A393A	13qB3
chr13	66431256	66431256	C	A	exonic	2410141K09Rik	.	synonymous SNV	2410141K09Rik:NM_001290196:exon4:c.G1167T:p.G389G	13qB3
chr13	66431361	66431361	T	C	exonic	2410141K09Rik	.	synonymous SNV	2410141K09Rik:NM_001290196:exon4:c.A1062G:p.P354P	13qB3
chr13	66431532	66431532	C	T	exonic	2410141K09Rik	.	synonymous SNV	2410141K09Rik:NM_001290196:exon4:c.G891A:p.K297K	13qB3
chr13	66431659	66431659	G	C	exonic	2410141K09Rik	.	nonsynonymous SNV	2410141K09Rik:NM_001290196:exon4:c.C764G:p.P255R	13qB3
chr13	66431826	66431826	G	A	exonic	2410141K09Rik	.	synonymous SNV	2410141K09Rik:NM_001290196:exon4:c.C597T:p.P199P	13qB3
chr13	66431917	66431917	G	T	exonic	2410141K09Rik	.	nonsynonymous SNV	2410141K09Rik:NM_001290196:exon4:c.C506A:p.A169E	13qB3
chr13	66431918	66431918	C	G	exonic	2410141K09Rik	.	nonsynonymous SNV	2410141K09Rik:NM_001290196:exon4:c.G505C:p.A169P	13qB3
chr13	66431998	66431998	C	G	exonic	2410141K09Rik	.	nonsynonymous SNV	2410141K09Rik:NM_001290196:exon4:c.G425C:p.C142S	13qB3
chr13	66432118	66432118	G	T	exonic	2410141K09Rik	.	nonsynonymous SNV	2410141K09Rik:NM_001290196:exon4:c.C305A:p.P102H	13qB3
chr13	66433725	66433725	G	C	exonic	2410141K09Rik	.	synonymous SNV	2410141K09Rik:NM_001290196:exon2:c.C84G:p.L28L,2410141K09Rik:NM_183119:exon2:c.C84G:p.L28L	13qB3
chr13	73562360	73562360	T	C	exonic	Slc6a3	.	nonsynonymous SNV	Slc6a3:NM_010020:exon8:c.T1088C:p.V363A	13qC1
chr13	93063579	93063579	C	G	exonic	Cmya5	.	nonsynonymous SNV	Cmya5:NM_023821:exon9:c.G10240C:p.A3414P	13qC3
chr13	93096639	93096639	T	C	exonic	Cmya5	.	nonsynonymous SNV	Cmya5:NM_023821:exon2:c.A1940G:p.E647G	13qC3
chr13	96947206	96947206	G	A	exonic	Gcnt4	.	nonsynonymous SNV	Gcnt4:NM_001166065:exon3:c.G1009A:p.E337K,Gcnt4:NM_001376999:exon3:c.G1009A:p.E337K	13qD1
chr13	100161909	100161909	A	T	exonic	Naip2	.	nonsynonymous SNV	Naip2:NM_001126182:exon11:c.T1618A:p.Y540N,Naip2:NM_010872:exon11:c.T1618A:p.Y540N	13qD1
chr13	111703743	111703743	C	T	exonic	Mier3	.	nonsynonymous SNV	Mier3:NM_172593:exon4:c.C295T:p.P99S	13qD2.2
chr13	114993917	114993917	G	A	exonic	Itga1	.	synonymous SNV	Itga1:NM_001033228:exon13:c.C1473T:p.S491S	13qD2.2
chr13	119609236	119609236	T	C	exonic	Tmem267	.	synonymous SNV	Tmem267:NM_001039244:exon3:c.T357C:p.T119T,Tmem267:NM_001177666:exon3:c.T357C:p.T119T,Tmem267:NM_001370626:exon3:c.T357C:p.T119T,Tmem267:NM_001370627:exon3:c.T357C:p.T119T	13qD2.3
chr14	29534518	29534518	A	G	exonic	Cacna2d3	.	nonsynonymous SNV	Cacna2d3:NM_009785:exon3:c.T284C:p.M95T	14qA3
chr14	32663188	32663188	A	C	exonic	3425401B19Rik	.	synonymous SNV	3425401B19Rik:NM_001195097:exon4:c.T819G:p.T273T	14qB
chr14	44171303	44171303	T	C	exonic	4930503E14Rik	.	startloss	4930503E14Rik:NM_029131:exon1:c.A1G:p.M1?	14qC1
chr14	45620722	45620722	G	C	exonic	Ddhd1	.	synonymous SNV	Ddhd1:NM_001039106:exon3:c.C1083G:p.G361G,Ddhd1:NM_176845:exon3:c.C1083G:p.G361G,Ddhd1:NM_001042719:exon4:c.C1185G:p.G395G,Ddhd1:NM_001284399:exon5:c.C72G:p.G24G	14qC1
chr14	51456213	51456213	C	T	exonic	Vmn2r89	.	nonsynonymous SNV	Vmn2r89:NM_001378723:exon3:c.C1019T:p.A340V,Vmn2r89:NM_001385186:exon3:c.C1019T:p.A340V,Vmn2r89:NM_009486:exon3:c.C1019T:p.A340V,Vmn2r89:NM_009487:exon3:c.C1019T:p.A340V	14qC1
chr14	51456222	51456222	C	T	exonic	Vmn2r89	.	nonsynonymous SNV	Vmn2r89:NM_001378723:exon3:c.C1028T:p.P343L,Vmn2r89:NM_001385186:exon3:c.C1028T:p.P343L,Vmn2r89:NM_009486:exon3:c.C1028T:p.P343L,Vmn2r89:NM_009487:exon3:c.C1028T:p.P343L	14qC1
chr14	51456224	51456224	G	A	exonic	Vmn2r89	.	nonsynonymous SNV	Vmn2r89:NM_001378723:exon3:c.G1030A:p.V344I,Vmn2r89:NM_001385186:exon3:c.G1030A:p.V344I,Vmn2r89:NM_009486:exon3:c.G1030A:p.V344I,Vmn2r89:NM_009487:exon3:c.G1030A:p.V344I	14qC1
chr14	51456225	51456225	T	A	exonic	Vmn2r89	.	nonsynonymous SNV	Vmn2r89:NM_001378723:exon3:c.T1031A:p.V344E,Vmn2r89:NM_001385186:exon3:c.T1031A:p.V344E,Vmn2r89:NM_009486:exon3:c.T1031A:p.V344E,Vmn2r89:NM_009487:exon3:c.T1031A:p.V344E	14qC1
chr14	51457396	51457396	G	T	exonic	Vmn2r89	.	synonymous SNV	Vmn2r89:NM_001378723:exon4:c.G1332T:p.P444P,Vmn2r89:NM_001385186:exon4:c.G1332T:p.P444P,Vmn2r89:NM_009487:exon4:c.G1332T:p.P444P	14qC1
chr14	51457439	51457439	A	G	exonic	Vmn2r89	.	nonsynonymous SNV	Vmn2r89:NM_001378723:exon4:c.A1375G:p.T459A,Vmn2r89:NM_001385186:exon4:c.A1375G:p.T459A,Vmn2r89:NM_009487:exon4:c.A1375G:p.T459A	14qC1
chr14	51457440	51457440	C	T	exonic	Vmn2r89	.	nonsynonymous SNV	Vmn2r89:NM_001378723:exon4:c.C1376T:p.T459I,Vmn2r89:NM_001385186:exon4:c.C1376T:p.T459I,Vmn2r89:NM_009487:exon4:c.C1376T:p.T459I	14qC1
chr14	51457481	51457481	C	T	exonic	Vmn2r89	.	nonsynonymous SNV	Vmn2r89:NM_001378723:exon4:c.C1417T:p.L473F,Vmn2r89:NM_001385186:exon4:c.C1417T:p.L473F,Vmn2r89:NM_009487:exon4:c.C1417T:p.L473F	14qC1
chr14	51457493	51457493	T	G	exonic	Vmn2r89	.	nonsynonymous SNV	Vmn2r89:NM_001378723:exon4:c.T1429G:p.L477V,Vmn2r89:NM_001385186:exon4:c.T1429G:p.L477V,Vmn2r89:NM_009487:exon4:c.T1429G:p.L477V	14qC1
chr14	51457511	51457511	A	T	exonic	Vmn2r89	.	nonsynonymous SNV	Vmn2r89:NM_001378723:exon4:c.A1447T:p.I483L,Vmn2r89:NM_001385186:exon4:c.A1447T:p.I483L,Vmn2r89:NM_009487:exon4:c.A1447T:p.I483L	14qC1
chr14	51457576	51457576	A	T	exonic	Vmn2r89	.	synonymous SNV	Vmn2r89:NM_001378723:exon4:c.A1512T:p.G504G,Vmn2r89:NM_001385186:exon4:c.A1512T:p.G504G,Vmn2r89:NM_009487:exon4:c.A1512T:p.G504G	14qC1
chr14	76417167	76417167	G	C	exonic	Tsc22d1	.	nonsynonymous SNV	Tsc22d1:NM_207652:exon1:c.G1085C:p.S362T	14qD3
chr14	118148257	118148257	A	G	exonic	Gpr180	.	synonymous SNV	Gpr180:NM_021434:exon3:c.A480G:p.P160P	14qE4
chr14	118594802	118594802	T	G	exonic	Abcc4	.	synonymous SNV	Abcc4:NM_001163676:exon18:c.A2190C:p.I730I,Abcc4:NM_001033336:exon19:c.A2415C:p.I805I,Abcc4:NM_001163675:exon19:c.A2286C:p.I762I	14qE4
chr14	118594862	118594862	C	T	exonic	Abcc4	.	synonymous SNV	Abcc4:NM_001163676:exon18:c.G2130A:p.L710L,Abcc4:NM_001033336:exon19:c.G2355A:p.L785L,Abcc4:NM_001163675:exon19:c.G2226A:p.L742L	14qE4
chr14	118596683	118596683	C	T	exonic	Abcc4	.	nonsynonymous SNV	Abcc4:NM_001163676:exon17:c.G2080A:p.A694T,Abcc4:NM_001033336:exon18:c.G2305A:p.A769T,Abcc4:NM_001163675:exon18:c.G2176A:p.A726T	14qE4
chr14	118597624	118597624	G	A	exonic	Abcc4	.	nonsynonymous SNV	Abcc4:NM_001163676:exon15:c.C1820T:p.T607M,Abcc4:NM_001033336:exon16:c.C2045T:p.T682M,Abcc4:NM_001163675:exon16:c.C1916T:p.T639M	14qE4
chr14	118599335	118599335	G	A	exonic	Abcc4	.	synonymous SNV	Abcc4:NM_001163676:exon14:c.C1788T:p.D596D,Abcc4:NM_001033336:exon15:c.C2013T:p.D671D,Abcc4:NM_001163675:exon15:c.C1884T:p.D628D	14qE4
chr14	118632104	118632104	G	A	exonic	Abcc4	.	synonymous SNV	Abcc4:NM_001163676:exon4:c.C390T:p.F130F,Abcc4:NM_001033336:exon5:c.C615T:p.F205F,Abcc4:NM_001163675:exon5:c.C486T:p.F162F	14qE4
chr14	118632116	118632116	G	A	exonic	Abcc4	.	synonymous SNV	Abcc4:NM_001163676:exon4:c.C378T:p.D126D,Abcc4:NM_001033336:exon5:c.C603T:p.D201D,Abcc4:NM_001163675:exon5:c.C474T:p.D158D	14qE4
chr14	118861823	118861823	T	C	exonic	Cldn10	.	synonymous SNV	Cldn10:NM_001160096:exon2:c.T285C:p.I95I,Cldn10:NM_001160097:exon2:c.T342C:p.I114I,Cldn10:NM_001160098:exon2:c.T285C:p.I95I,Cldn10:NM_001160099:exon2:c.T348C:p.I116I,Cldn10:NM_021386:exon2:c.T348C:p.I116I,Cldn10:NM_023878:exon2:c.T342C:p.I114I	14qE4
chr14	118874224	118874224	C	T	exonic	Cldn10	.	nonsynonymous SNV	Cldn10:NM_001160097:exon4:c.C491T:p.A164V,Cldn10:NM_001160098:exon4:c.C434T:p.A145V,Cldn10:NM_001160099:exon4:c.C497T:p.A166V,Cldn10:NM_001160096:exon5:c.C542T:p.A181V,Cldn10:NM_021386:exon5:c.C605T:p.A202V,Cldn10:NM_023878:exon5:c.C599T:p.A200V	14qE4
chr14	118874274	118874274	A	G	exonic	Cldn10	.	nonsynonymous SNV	Cldn10:NM_001160097:exon4:c.A541G:p.T181A,Cldn10:NM_001160098:exon4:c.A484G:p.T162A,Cldn10:NM_001160099:exon4:c.A547G:p.T183A,Cldn10:NM_001160096:exon5:c.A592G:p.T198A,Cldn10:NM_021386:exon5:c.A655G:p.T219A,Cldn10:NM_023878:exon5:c.A649G:p.T217A	14qE4
chr15	11036196	11036196	G	C	exonic	Rxfp3	.	nonsynonymous SNV	Rxfp3:NM_178717:exon1:c.C1089G:p.S363R	15qA1
chr15	28448418	28448418	T	G	exonic	Dnah5	.	nonsynonymous SNV	Dnah5:NM_133365:exon73:c.T12626G:p.F4209C	15qB1
chr15	39478581	39478581	T	C	exonic	Rims2	.	synonymous SNV	Rims2:NM_001256382:exon13:c.T2665C:p.L889L,Rims2:NM_001256383:exon13:c.T2665C:p.L889L,Rims2:NM_053271:exon15:c.T2785C:p.L929L	15qB3.1
chr15	57250900	57250900	A	T	exonic	Slc22a22	.	nonsynonymous SNV	Slc22a22:NM_001357930:exon7:c.T1030A:p.L344M,Slc22a22:NM_172378:exon8:c.T1030A:p.L344M	15qD1
chr15	57250957	57250957	T	C	exonic	Slc22a22	.	nonsynonymous SNV	Slc22a22:NM_001357930:exon7:c.A973G:p.K325E,Slc22a22:NM_172378:exon8:c.A973G:p.K325E	15qD1
chr15	57821445	57821445	T	C	exonic	Zhx2	.	nonsynonymous SNV	Zhx2:NM_199449:exon3:c.T209C:p.L70P	15qD1
chr15	57821722	57821722	C	T	exonic	Zhx2	.	synonymous SNV	Zhx2:NM_199449:exon3:c.C486T:p.V162V	15qD1
chr15	57822160	57822160	C	A	exonic	Zhx2	.	synonymous SNV	Zhx2:NM_199449:exon3:c.C924A:p.I308I	15qD1
chr15	57822247	57822247	G	C	exonic	Zhx2	.	synonymous SNV	Zhx2:NM_199449:exon3:c.G1011C:p.T337T	15qD1
chr15	57822394	57822394	A	C	exonic	Zhx2	.	synonymous SNV	Zhx2:NM_199449:exon3:c.A1158C:p.T386T	15qD1
chr15	57822403	57822403	C	G	exonic	Zhx2	.	synonymous SNV	Zhx2:NM_199449:exon3:c.C1167G:p.S389S	15qD1
chr15	57822424	57822424	G	A	exonic	Zhx2	.	synonymous SNV	Zhx2:NM_199449:exon3:c.G1188A:p.A396A	15qD1
chr15	57822442	57822442	T	C	exonic	Zhx2	.	synonymous SNV	Zhx2:NM_199449:exon3:c.T1206C:p.N402N	15qD1
chr15	57822505	57822505	T	C	exonic	Zhx2	.	synonymous SNV	Zhx2:NM_199449:exon3:c.T1269C:p.I423I	15qD1
chr15	57822547	57822547	G	A	exonic	Zhx2	.	synonymous SNV	Zhx2:NM_199449:exon3:c.G1311A:p.P437P	15qD1
chr15	57822574	57822574	G	A	exonic	Zhx2	.	synonymous SNV	Zhx2:NM_199449:exon3:c.G1338A:p.K446K	15qD1
chr15	57822625	57822625	C	T	exonic	Zhx2	.	synonymous SNV	Zhx2:NM_199449:exon3:c.C1389T:p.F463F	15qD1
chr15	57822883	57822883	A	G	exonic	Zhx2	.	synonymous SNV	Zhx2:NM_199449:exon3:c.A1647G:p.L549L	15qD1
chr15	57823331	57823331	A	C	exonic	Zhx2	.	nonsynonymous SNV	Zhx2:NM_199449:exon3:c.A2095C:p.M699L	15qD1
chr15	77638007	77638007	A	C	exonic	Apol11b	.	nonsynonymous SNV	Apol11b:NM_001143686:exon3:c.T89G:p.I30R	15qE1
chr15	89548922	89548922	C	G	exonic	Shank3	.	nonsynonymous SNV	Shank3:NM_021423:exon21:c.C3869G:p.A1290G	15qE3
chr15	89549359	89549359	G	C	exonic	Shank3	.	nonsynonymous SNV	Shank3:NM_021423:exon21:c.G4306C:p.D1436H	15qE3
chr15	101433138	101433138	A	G	exonic	Krt87	.	nonsynonymous SNV	Krt87:NM_001003668:exon7:c.T1226C:p.I409T	15qF2
chr15	101433139	101433139	T	C	exonic	Krt87	.	nonsynonymous SNV	Krt87:NM_001003668:exon7:c.A1225G:p.I409V	15qF2
chr15	101433148	101433148	C	T	exonic	Krt87	.	nonsynonymous SNV	Krt87:NM_001003668:exon7:c.G1216A:p.V406I	15qF2
chr15	101433149	101433149	A	G	exonic	Krt87	.	synonymous SNV	Krt87:NM_001003668:exon7:c.T1215C:p.D405D	15qF2
chr15	101433155	101433155	C	T	exonic	Krt87	.	synonymous SNV	Krt87:NM_001003668:exon7:c.G1209A:p.G403G	15qF2
chr15	101433156	101433156	C	G	exonic	Krt87	.	nonsynonymous SNV	Krt87:NM_001003668:exon7:c.G1208C:p.G403A	15qF2
chr15	101433160	101433160	A	G	exonic	Krt87	.	synonymous SNV	Krt87:NM_001003668:exon7:c.T1204C:p.L402L	15qF2
chr15	101433173	101433173	C	T	exonic	Krt87	.	synonymous SNV	Krt87:NM_001003668:exon7:c.G1191A:p.V397V	15qF2
chr15	101433185	101433185	T	C	exonic	Krt87	.	synonymous SNV	Krt87:NM_001003668:exon7:c.A1179G:p.E393E	15qF2
chr15	101433206	101433206	A	G	exonic	Krt87	.	synonymous SNV	Krt87:NM_001003668:exon7:c.T1158C:p.D386D	15qF2
chr15	101433215	101433215	A	G	exonic	Krt87	.	synonymous SNV	Krt87:NM_001003668:exon7:c.T1149C:p.A383A	15qF2
chr15	101438441	101438441	C	T	exonic	Krt87	.	synonymous SNV	Krt87:NM_001003668:exon1:c.G330A:p.E110E	15qF2
chr15	101438446	101438446	G	A	exonic	Krt87	.	nonsynonymous SNV	Krt87:NM_001003668:exon1:c.C325T:p.H109Y	15qF2
chr15	101438489	101438489	T	C	exonic	Krt87	.	synonymous SNV	Krt87:NM_001003668:exon1:c.A282G:p.T94T	15qF2
chr15	101438531	101438531	G	C	exonic	Krt87	.	synonymous SNV	Krt87:NM_001003668:exon1:c.C240G:p.P80P	15qF2
chr15	101438543	101438543	G	A	exonic	Krt87	.	synonymous SNV	Krt87:NM_001003668:exon1:c.C228T:p.C76C	15qF2
chr15	101438558	101438558	T	A	exonic	Krt87	.	synonymous SNV	Krt87:NM_001003668:exon1:c.A213T:p.R71R	15qF2
chr15	101438564	101438564	C	T	exonic	Krt87	.	synonymous SNV	Krt87:NM_001003668:exon1:c.G207A:p.G69G	15qF2
chr15	101487866	101487866	T	C	exonic	Krt83;Krt85	.	nonsynonymous SNV	Krt83:NM_001201323:exon5:c.A847G:p.I283V	15qF2
chr15	101488381	101488381	A	T	exonic	Krt83;Krt85	.	synonymous SNV	Krt83:NM_001201323:exon3:c.T624A:p.A208A	15qF2
chr15	101488382	101488382	G	A	exonic	Krt83;Krt85	.	nonsynonymous SNV	Krt83:NM_001201323:exon3:c.C623T:p.A208V	15qF2
chr15	101488405	101488405	G	A	exonic	Krt83;Krt85	.	synonymous SNV	Krt83:NM_001201323:exon3:c.C600T:p.A200A	15qF2
chr15	101488410	101488410	G	T	exonic	Krt83;Krt85	.	synonymous SNV	Krt83:NM_001201323:exon3:c.C595A:p.R199R	15qF2
chr15	101488411	101488411	G	C	exonic	Krt83;Krt85	.	synonymous SNV	Krt83:NM_001201323:exon3:c.C594G:p.L198L	15qF2
chr15	101488414	101488414	T	A	exonic	Krt83;Krt85	.	synonymous SNV	Krt83:NM_001201323:exon3:c.A591T:p.A197A	15qF2
chr15	101488417	101488417	A	C	exonic	Krt83;Krt85	.	synonymous SNV	Krt83:NM_001201323:exon3:c.T588G:p.V196V	15qF2
chr15	101488420	101488420	T	C	exonic	Krt83;Krt85	.	synonymous SNV	Krt83:NM_001201323:exon3:c.A585G:p.E195E	15qF2
chr15	101488423	101488423	T	C	exonic	Krt83;Krt85	.	synonymous SNV	Krt83:NM_001201323:exon3:c.A582G:p.E194E	15qF2
chr15	103896013	103896013	C	T	exonic	Mucl2	.	nonsynonymous SNV	Mucl2:NM_009267:exon4:c.G410A:p.R137H	15qF3
chr15	103896015	103896015	T	A	exonic	Mucl2	.	nonsynonymous SNV	Mucl2:NM_009267:exon4:c.A408T:p.Q136H	15qF3
chr15	103896032	103896032	G	C	exonic	Mucl2	.	nonsynonymous SNV	Mucl2:NM_009267:exon4:c.C391G:p.L131V	15qF3
chr15	103896041	103896041	C	T	exonic	Mucl2	.	nonsynonymous SNV	Mucl2:NM_009267:exon4:c.G382A:p.V128I	15qF3
chr15	103896053	103896053	T	C	exonic	Mucl2	.	nonsynonymous SNV	Mucl2:NM_009267:exon4:c.A370G:p.I124V	15qF3
chr15	103897330	103897330	C	T	exonic	Mucl2	.	nonsynonymous SNV	Mucl2:NM_009267:exon3:c.G360A:p.M120I	15qF3
chr15	103897335	103897335	T	C	exonic	Mucl2	.	nonsynonymous SNV	Mucl2:NM_009267:exon3:c.A355G:p.N119D	15qF3
chr15	103897363	103897363	G	T	exonic	Mucl2	.	nonsynonymous SNV	Mucl2:NM_009267:exon3:c.C327A:p.D109E	15qF3
chr16	11147274	11147274	T	C	exonic	Zc3h7a	.	nonsynonymous SNV	Zc3h7a:NM_145931:exon16:c.A1994G:p.E665G	16qA1
chr16	17358955	17358955	G	A	exonic	Pi4ka	.	nonsynonymous SNV	Pi4ka:NM_001001983:exon11:c.C1126T:p.R376C,Pi4ka:NM_001373955:exon11:c.C1309T:p.R437C	16qA3
chr16	28828069	28828069	C	A	exonic	Mb21d2	.	nonsynonymous SNV	Mb21d2:NM_177718:exon2:c.G1152T:p.M384I	16qB2
chr16	31888124	31888124	T	C	exonic	Meltf	.	synonymous SNV	Meltf:NM_013900:exon8:c.T915C:p.H305H	16qB2
chr16	32282362	32282362	G	C	exonic	Rnf168	.	nonsynonymous SNV	Rnf168:NM_027355:exon2:c.G359C:p.R120P	16qB3
chr16	32752220	32752220	C	G	exonic	Muc4	.	nonsynonymous SNV	Muc4:NM_080457:exon2:c.C2097G:p.S699R	16qB3
chr16	32752234	32752234	G	C	exonic	Muc4	.	nonsynonymous SNV	Muc4:NM_080457:exon2:c.G2111C:p.S704T	16qB3
chr16	32752238	32752238	T	G	exonic	Muc4	.	nonsynonymous SNV	Muc4:NM_080457:exon2:c.T2115G:p.N705K	16qB3
chr16	32752239	32752239	C	T	exonic	Muc4	.	nonsynonymous SNV	Muc4:NM_080457:exon2:c.C2116T:p.P706S	16qB3
chr16	32752249	32752249	C	A	exonic	Muc4	.	nonsynonymous SNV	Muc4:NM_080457:exon2:c.C2126A:p.T709N	16qB3
chr16	32752253	32752253	C	A	exonic	Muc4	.	synonymous SNV	Muc4:NM_080457:exon2:c.C2130A:p.T710T	16qB3
chr16	32752261	32752261	T	A	exonic	Muc4	.	nonsynonymous SNV	Muc4:NM_080457:exon2:c.T2138A:p.V713E	16qB3
chr16	32752262	32752262	G	T	exonic	Muc4	.	synonymous SNV	Muc4:NM_080457:exon2:c.G2139T:p.V713V	16qB3
chr16	32752270	32752270	C	T	exonic	Muc4	.	nonsynonymous SNV	Muc4:NM_080457:exon2:c.C2147T:p.T716I	16qB3
chr16	32752276	32752276	A	C	exonic	Muc4	.	nonsynonymous SNV	Muc4:NM_080457:exon2:c.A2153C:p.N718T	16qB3
chr16	32752292	32752292	A	C	exonic	Muc4	.	synonymous SNV	Muc4:NM_080457:exon2:c.A2169C:p.S723S	16qB3
chr16	32752294	32752294	G	C	exonic	Muc4	.	nonsynonymous SNV	Muc4:NM_080457:exon2:c.G2171C:p.R724P	16qB3
chr16	32752302	32752302	A	T	exonic	Muc4	.	nonsynonymous SNV	Muc4:NM_080457:exon2:c.A2179T:p.I727F	16qB3
chr16	32752359	32752359	T	C	exonic	Muc4	.	nonsynonymous SNV	Muc4:NM_080457:exon2:c.T2236C:p.Y746H	16qB3
chr16	32752384	32752384	C	G	exonic	Muc4	.	nonsynonymous SNV	Muc4:NM_080457:exon2:c.C2261G:p.A754G	16qB3
chr16	32752385	32752385	T	A	exonic	Muc4	.	synonymous SNV	Muc4:NM_080457:exon2:c.T2262A:p.A754A	16qB3
chr16	32752398	32752398	C	A	exonic	Muc4	.	nonsynonymous SNV	Muc4:NM_080457:exon2:c.C2275A:p.H759N	16qB3
chr16	32752420	32752420	C	A	exonic	Muc4	.	nonsynonymous SNV	Muc4:NM_080457:exon2:c.C2297A:p.S766Y	16qB3
chr16	32752441	32752441	A	G	exonic	Muc4	.	nonsynonymous SNV	Muc4:NM_080457:exon2:c.A2318G:p.D773G	16qB3
chr16	32752446	32752446	A	G	exonic	Muc4	.	nonsynonymous SNV	Muc4:NM_080457:exon2:c.A2323G:p.R775G	16qB3
chr16	32752449	32752449	C	T	exonic	Muc4	.	nonsynonymous SNV	Muc4:NM_080457:exon2:c.C2326T:p.H776Y	16qB3
chr16	32752456	32752456	T	C	exonic	Muc4	.	nonsynonymous SNV	Muc4:NM_080457:exon2:c.T2333C:p.I778T	16qB3
chr16	32752462	32752462	T	A	exonic	Muc4	.	nonsynonymous SNV	Muc4:NM_080457:exon2:c.T2339A:p.V780E	16qB3
chr16	32752466	32752466	G	A	exonic	Muc4	.	synonymous SNV	Muc4:NM_080457:exon2:c.G2343A:p.R781R	16qB3
chr16	32752533	32752533	A	G	exonic	Muc4	.	nonsynonymous SNV	Muc4:NM_080457:exon2:c.A2410G:p.T804A	16qB3
chr16	32752544	32752544	C	A	exonic	Muc4	.	synonymous SNV	Muc4:NM_080457:exon2:c.C2421A:p.T807T	16qB3
chr16	32752547	32752547	A	T	exonic	Muc4	.	synonymous SNV	Muc4:NM_080457:exon2:c.A2424T:p.S808S	16qB3
chr16	32752555	32752555	T	A	exonic	Muc4	.	nonsynonymous SNV	Muc4:NM_080457:exon2:c.T2432A:p.I811N	16qB3
chr16	32752570	32752570	C	T	exonic	Muc4	.	nonsynonymous SNV	Muc4:NM_080457:exon2:c.C2447T:p.P816L	16qB3
chr16	32752594	32752594	A	T	exonic	Muc4	.	nonsynonymous SNV	Muc4:NM_080457:exon2:c.A2471T:p.K824M	16qB3
chr16	32752601	32752601	C	T	exonic	Muc4	.	synonymous SNV	Muc4:NM_080457:exon2:c.C2478T:p.T826T	16qB3
chr16	32752604	32752604	C	T	exonic	Muc4	.	synonymous SNV	Muc4:NM_080457:exon2:c.C2481T:p.S827S	16qB3
chr16	32752635	32752635	G	A	exonic	Muc4	.	nonsynonymous SNV	Muc4:NM_080457:exon2:c.G2512A:p.V838I	16qB3
chr16	32752637	32752637	A	G	exonic	Muc4	.	synonymous SNV	Muc4:NM_080457:exon2:c.A2514G:p.V838V	16qB3
chr16	32752657	32752657	G	C	exonic	Muc4	.	nonsynonymous SNV	Muc4:NM_080457:exon2:c.G2534C:p.G845A	16qB3
chr16	32752665	32752665	G	C	exonic	Muc4	.	nonsynonymous SNV	Muc4:NM_080457:exon2:c.G2542C:p.G848R	16qB3
chr16	32753764	32753764	C	A	exonic	Muc4	.	synonymous SNV	Muc4:NM_080457:exon3:c.C3639A:p.S1213S	16qB3
chr16	32753770	32753770	C	T	exonic	Muc4	.	synonymous SNV	Muc4:NM_080457:exon3:c.C3645T:p.N1215N	16qB3
chr16	32753802	32753802	T	C	exonic	Muc4	.	nonsynonymous SNV	Muc4:NM_080457:exon3:c.T3677C:p.I1226T	16qB3
chr16	32753819	32753819	C	T	exonic	Muc4	.	nonsynonymous SNV	Muc4:NM_080457:exon3:c.C3694T:p.L1232F	16qB3
chr16	32753823	32753823	C	T	exonic	Muc4	.	nonsynonymous SNV	Muc4:NM_080457:exon3:c.C3698T:p.P1233L	16qB3
chr16	32753845	32753845	C	G	exonic	Muc4	.	nonsynonymous SNV	Muc4:NM_080457:exon3:c.C3720G:p.S1240R	16qB3
chr16	32753848	32753848	G	T	exonic	Muc4	.	nonsynonymous SNV	Muc4:NM_080457:exon3:c.G3723T:p.K1241N	16qB3
chr16	32753849	32753849	G	A	exonic	Muc4	.	nonsynonymous SNV	Muc4:NM_080457:exon3:c.G3724A:p.G1242R	16qB3
chr16	32753863	32753863	T	G	exonic	Muc4	.	nonsynonymous SNV	Muc4:NM_080457:exon3:c.T3738G:p.N1246K	16qB3
chr16	32753880	32753880	C	T	exonic	Muc4	.	nonsynonymous SNV	Muc4:NM_080457:exon3:c.C3755T:p.T1252I	16qB3
chr16	32753881	32753881	C	G	exonic	Muc4	.	synonymous SNV	Muc4:NM_080457:exon3:c.C3756G:p.T1252T	16qB3
chr16	32753886	32753886	A	T	exonic	Muc4	.	nonsynonymous SNV	Muc4:NM_080457:exon3:c.A3761T:p.E1254V	16qB3
chr16	32753888	32753888	G	A	exonic	Muc4	.	nonsynonymous SNV	Muc4:NM_080457:exon3:c.G3763A:p.V1255M	16qB3
chr16	32753901	32753901	C	A	exonic	Muc4	.	nonsynonymous SNV	Muc4:NM_080457:exon3:c.C3776A:p.T1259N	16qB3
chr16	32753916	32753916	C	T	exonic	Muc4	.	nonsynonymous SNV	Muc4:NM_080457:exon3:c.C3791T:p.S1264L	16qB3
chr16	32753917	32753917	A	C	exonic	Muc4	.	synonymous SNV	Muc4:NM_080457:exon3:c.A3792C:p.S1264S	16qB3
chr16	32753919	32753919	G	C	exonic	Muc4	.	nonsynonymous SNV	Muc4:NM_080457:exon3:c.G3794C:p.R1265P	16qB3
chr16	32753927	32753927	A	T	exonic	Muc4	.	nonsynonymous SNV	Muc4:NM_080457:exon3:c.A3802T:p.I1268F	16qB3
chr16	32753930	32753930	C	G	exonic	Muc4	.	nonsynonymous SNV	Muc4:NM_080457:exon3:c.C3805G:p.Q1269E	16qB3
chr16	32753946	32753946	C	T	exonic	Muc4	.	nonsynonymous SNV	Muc4:NM_080457:exon3:c.C3821T:p.S1274F	16qB3
chr16	32753955	32753955	C	A	exonic	Muc4	.	nonsynonymous SNV	Muc4:NM_080457:exon3:c.C3830A:p.T1277K	16qB3
chr16	32753963	32753963	C	T	exonic	Muc4	.	nonsynonymous SNV	Muc4:NM_080457:exon3:c.C3838T:p.P1280S	16qB3
chr16	32754333	32754333	T	A	exonic	Muc4	.	synonymous SNV	Muc4:NM_080457:exon4:c.T4206A:p.A1402A	16qB3
chr16	32754393	32754393	G	T	exonic	Muc4	.	nonsynonymous SNV	Muc4:NM_080457:exon4:c.G4266T:p.K1422N	16qB3
chr16	32754394	32754394	G	A	exonic	Muc4	.	nonsynonymous SNV	Muc4:NM_080457:exon4:c.G4267A:p.G1423R	16qB3
chr16	32754425	32754425	A	T	exonic	Muc4	.	nonsynonymous SNV	Muc4:NM_080457:exon4:c.A4298T:p.N1433I	16qB3
chr16	32754426	32754426	T	C	exonic	Muc4	.	synonymous SNV	Muc4:NM_080457:exon4:c.T4299C:p.N1433N	16qB3
chr16	32754427	32754427	G	C	exonic	Muc4	.	nonsynonymous SNV	Muc4:NM_080457:exon4:c.G4300C:p.A1434P	16qB3
chr16	32754529	32754529	C	A	exonic	Muc4	.	nonsynonymous SNV	Muc4:NM_080457:exon4:c.C4402A:p.H1468N	16qB3
chr16	32754535	32754535	C	T	exonic	Muc4	.	nonsynonymous SNV	Muc4:NM_080457:exon4:c.C4408T:p.P1470S	16qB3
chr16	32754541	32754541	A	T	exonic	Muc4	.	nonsynonymous SNV	Muc4:NM_080457:exon4:c.A4414T:p.M1472L	16qB3
chr16	32754546	32754546	T	C	exonic	Muc4	.	synonymous SNV	Muc4:NM_080457:exon4:c.T4419C:p.S1473S	16qB3
chr16	32754599	32754599	T	G	exonic	Muc4	.	nonsynonymous SNV	Muc4:NM_080457:exon4:c.T4472G:p.I1491S	16qB3
chr16	32754739	32754739	C	T	exonic	Muc4	.	nonsynonymous SNV	Muc4:NM_080457:exon4:c.C4612T:p.P1538S	16qB3
chr16	32754741	32754741	A	T	exonic	Muc4	.	synonymous SNV	Muc4:NM_080457:exon4:c.A4614T:p.P1538P	16qB3
chr16	32754742	32754742	A	C	exonic	Muc4	.	nonsynonymous SNV	Muc4:NM_080457:exon4:c.A4615C:p.K1539Q	16qB3
chr16	32754794	32754794	T	C	exonic	Muc4	.	nonsynonymous SNV	Muc4:NM_080457:exon4:c.T4667C:p.I1556T	16qB3
chr16	32755676	32755676	C	G	exonic	Muc4	.	nonsynonymous SNV	Muc4:NM_080457:exon4:c.C5549G:p.A1850G	16qB3
chr16	32755677	32755677	T	A	exonic	Muc4	.	synonymous SNV	Muc4:NM_080457:exon4:c.T5550A:p.A1850A	16qB3
chr16	32755684	32755684	T	A	exonic	Muc4	.	nonsynonymous SNV	Muc4:NM_080457:exon4:c.T5557A:p.S1853T	16qB3
chr16	32755690	32755690	C	A	exonic	Muc4	.	nonsynonymous SNV	Muc4:NM_080457:exon4:c.C5563A:p.H1855N	16qB3
chr16	32755699	32755699	T	A	exonic	Muc4	.	nonsynonymous SNV	Muc4:NM_080457:exon4:c.T5572A:p.S1858T	16qB3
chr16	32755703	32755703	C	G	exonic	Muc4	.	nonsynonymous SNV	Muc4:NM_080457:exon4:c.C5576G:p.T1859R	16qB3
chr16	32755705	32755705	G	A	exonic	Muc4	.	nonsynonymous SNV	Muc4:NM_080457:exon4:c.G5578A:p.A1860T	16qB3
chr16	32755717	32755717	G	C	exonic	Muc4	.	nonsynonymous SNV	Muc4:NM_080457:exon4:c.G5590C:p.E1864Q	16qB3
chr16	32755792	32755792	A	T	exonic	Muc4	.	nonsynonymous SNV	Muc4:NM_080457:exon4:c.A5665T:p.T1889S	16qB3
chr16	32755805	32755805	C	T	exonic	Muc4	.	nonsynonymous SNV	Muc4:NM_080457:exon4:c.C5678T:p.S1893L	16qB3
chr16	32755843	32755843	T	G	exonic	Muc4	.	nonsynonymous SNV	Muc4:NM_080457:exon4:c.T5716G:p.S1906A	16qB3
chr16	32755857	32755857	G	C	exonic	Muc4	.	nonsynonymous SNV	Muc4:NM_080457:exon4:c.G5730C:p.L1910F	16qB3
chr16	32755861	32755861	C	A	exonic	Muc4	.	nonsynonymous SNV	Muc4:NM_080457:exon4:c.C5734A:p.P1912T	16qB3
chr16	32755886	32755886	A	G	exonic	Muc4	.	nonsynonymous SNV	Muc4:NM_080457:exon4:c.A5759G:p.E1920G	16qB3
chr16	32755889	32755889	A	G	exonic	Muc4	.	nonsynonymous SNV	Muc4:NM_080457:exon4:c.A5762G:p.N1921S	16qB3
chr16	32755892	32755892	T	A	exonic	Muc4	.	nonsynonymous SNV	Muc4:NM_080457:exon4:c.T5765A:p.M1922K	16qB3
chr16	36495215	36495215	T	G	exonic	Casr	.	nonsynonymous SNV	Casr:NM_013803:exon7:c.A2492C:p.K831T	16qB3
chr16	36722375	36722375	G	C	exonic	Ildr1	.	nonsynonymous SNV	Ildr1:NM_001285791:exon6:c.G1136C:p.C379S,Ildr1:NM_001285788:exon7:c.G1268C:p.C423S,Ildr1:NM_134109:exon7:c.G1268C:p.C423S	16qB3
chr16	36772445	36772445	A	G	exonic	Slc15a2	.	nonsynonymous SNV	Slc15a2:NM_001145899:exon6:c.T629C:p.M210T,Slc15a2:NM_021301:exon6:c.T629C:p.M210T	16qB3
chr16	44101852	44101852	C	G	exonic	Atp6v1a	.	nonsynonymous SNV	Atp6v1a:NM_001358203:exon9:c.G1022C:p.G341A,Atp6v1a:NM_001358204:exon9:c.G1022C:p.G341A,Atp6v1a:NM_007508:exon9:c.G1022C:p.G341A	16qB4
chr16	57628128	57628128	G	C	exonic	Col8a1	.	nonsynonymous SNV	Col8a1:NM_007739:exon4:c.C1018G:p.P340A	16qC1.1
chr16	59269214	59269214	A	C	exonic	Olfr201	.	nonsynonymous SNV	Olfr201:NM_146994:exon1:c.T452G:p.L151R	16qC1.3
chr16	98010801	98010801	A	G	exonic	B230307C23Rik	.	nonsynonymous SNV	B230307C23Rik:NM_001362093:exon4:c.A874G:p.R292G	16qC4
chr16	98010960	98010960	A	G	exonic	B230307C23Rik	.	nonsynonymous SNV	B230307C23Rik:NM_001362093:exon4:c.A1033G:p.I345V	16qC4
chr16	98010982	98010982	T	A	exonic	B230307C23Rik	.	nonsynonymous SNV	B230307C23Rik:NM_001362093:exon4:c.T1055A:p.F352Y	16qC4
chr16	98011005	98011005	A	G	exonic	B230307C23Rik	.	nonsynonymous SNV	B230307C23Rik:NM_001362093:exon4:c.A1078G:p.T360A	16qC4
chr16	98011095	98011095	G	A	exonic	B230307C23Rik	.	nonsynonymous SNV	B230307C23Rik:NM_001362093:exon4:c.G1168A:p.A390T	16qC4
chr16	98011115	98011115	A	C	exonic	B230307C23Rik	.	nonsynonymous SNV	B230307C23Rik:NM_001362093:exon4:c.A1188C:p.Q396H	16qC4
chr16	98011117	98011117	G	T	exonic	B230307C23Rik	.	nonsynonymous SNV	B230307C23Rik:NM_001362093:exon4:c.G1190T:p.S397I	16qC4
chr16	98011154	98011154	G	A	exonic	B230307C23Rik	.	synonymous SNV	B230307C23Rik:NM_001362093:exon4:c.G1227A:p.K409K	16qC4
chr16	98011159	98011159	T	A	exonic	B230307C23Rik	.	nonsynonymous SNV	B230307C23Rik:NM_001362093:exon4:c.T1232A:p.I411N	16qC4
chr16	98011192	98011192	G	C	exonic	B230307C23Rik	.	nonsynonymous SNV	B230307C23Rik:NM_001362093:exon4:c.G1265C:p.S422T	16qC4
chr16	98011201	98011201	G	T	exonic	B230307C23Rik	.	nonsynonymous SNV	B230307C23Rik:NM_001362093:exon4:c.G1274T:p.G425V	16qC4
chr16	98011207	98011207	A	G	exonic	B230307C23Rik	.	nonsynonymous SNV	B230307C23Rik:NM_001362093:exon4:c.A1280G:p.K427R	16qC4
chr16	98011298	98011298	T	A	exonic	B230307C23Rik	.	synonymous SNV	B230307C23Rik:NM_001362093:exon4:c.T1371A:p.I457I	16qC4
chr16	98011373	98011373	C	T	exonic	B230307C23Rik	.	synonymous SNV	B230307C23Rik:NM_001362093:exon4:c.C1446T:p.H482H	16qC4
chr16	98011674	98011674	A	G	exonic	B230307C23Rik	.	nonsynonymous SNV	B230307C23Rik:NM_001362093:exon4:c.A1747G:p.S583G	16qC4
chr16	98011699	98011699	G	C	exonic	B230307C23Rik	.	nonsynonymous SNV	B230307C23Rik:NM_001362093:exon4:c.G1772C:p.S591T	16qC4
chr16	98011714	98011714	A	G	exonic	B230307C23Rik	.	nonsynonymous SNV	B230307C23Rik:NM_001362093:exon4:c.A1787G:p.K596R	16qC4
chr16	98011735	98011735	A	T	exonic	B230307C23Rik	.	nonsynonymous SNV	B230307C23Rik:NM_001362093:exon4:c.A1808T:p.K603I	16qC4
chr17	12242767	12242767	T	G	exonic	Map3k4	.	nonsynonymous SNV	Map3k4:NM_011948:exon17:c.A3524C:p.N1175T	17qA1
chr17	12975400	12975400	T	C	exonic	Wtap	.	synonymous SNV	Wtap:NM_001113532:exon6:c.A348G:p.A116A,Wtap:NM_001113533:exon6:c.A348G:p.A116A,Wtap:NM_001379058:exon6:c.A348G:p.A116A,Wtap:NM_175394:exon6:c.A348G:p.A116A	17qA1
chr17	14348741	14348741	A	C	exonic	Smoc2	.	nonsynonymous SNV	Smoc2:NM_022315:exon7:c.A600C:p.Q200H	17qA2
chr17	17039837	17039837	G	A	exonic	Gm51425	.	synonymous SNV	Gm51425:NM_001374002:exon4:c.G1059A:p.E353E,Gm51425:NM_001374000:exon5:c.G936A:p.E312E	17qA3.1
chr17	17040056	17040056	T	A	exonic	Gm51425	.	nonsynonymous SNV	Gm51425:NM_001374002:exon4:c.T1278A:p.H426Q,Gm51425:NM_001374000:exon5:c.T1155A:p.H385Q	17qA3.1
chr17	17040233	17040233	T	A	exonic	Gm51425	.	synonymous SNV	Gm51425:NM_001374002:exon4:c.T1455A:p.T485T,Gm51425:NM_001374000:exon5:c.T1332A:p.T444T	17qA3.1
chr17	17040284	17040284	C	T	exonic	Gm51425	.	synonymous SNV	Gm51425:NM_001374002:exon4:c.C1506T:p.G502G,Gm51425:NM_001374000:exon5:c.C1383T:p.G461G	17qA3.1
chr17	17040388	17040388	G	A	exonic	Gm51425	.	nonsynonymous SNV	Gm51425:NM_001374002:exon4:c.G1610A:p.R537K,Gm51425:NM_001374000:exon5:c.G1487A:p.R496K	17qA3.1
chr17	17040393	17040393	C	T	exonic	Gm51425	.	nonsynonymous SNV	Gm51425:NM_001374002:exon4:c.C1615T:p.L539F,Gm51425:NM_001374000:exon5:c.C1492T:p.L498F	17qA3.1
chr17	22689871	22689871	A	G	exonic	Gm9805	.	nonsynonymous SNV	Gm9805:NM_001362121:exon5:c.A1127G:p.Y376C,Gm9805:NM_001377043:exon5:c.A1127G:p.Y376C	17qA3.3
chr17	23290950	23290950	C	T	exonic	Vmn2r114	.	nonsynonymous SNV	Vmn2r114:NM_001102584:exon6:c.G2555A:p.R852H	17qA3.3
chr17	23290965	23290965	G	A	exonic	Vmn2r114	.	nonsynonymous SNV	Vmn2r114:NM_001102584:exon6:c.C2540T:p.A847V	17qA3.3
chr17	23290967	23290967	C	T	exonic	Vmn2r114	.	synonymous SNV	Vmn2r114:NM_001102584:exon6:c.G2538A:p.R846R	17qA3.3
chr17	23290983	23290983	G	T	exonic	Vmn2r114	.	nonsynonymous SNV	Vmn2r114:NM_001102584:exon6:c.C2522A:p.S841Y	17qA3.3
chr17	23291120	23291120	G	T	exonic	Vmn2r114	.	synonymous SNV	Vmn2r114:NM_001102584:exon6:c.C2385A:p.I795I	17qA3.3
chr17	23291129	23291129	G	A	exonic	Vmn2r114	.	synonymous SNV	Vmn2r114:NM_001102584:exon6:c.C2376T:p.V792V	17qA3.3
chr17	23291150	23291150	C	A	exonic	Vmn2r114	.	synonymous SNV	Vmn2r114:NM_001102584:exon6:c.G2355T:p.L785L	17qA3.3
chr17	23291197	23291197	G	A	exonic	Vmn2r114	.	nonsynonymous SNV	Vmn2r114:NM_001102584:exon6:c.C2308T:p.L770F	17qA3.3
chr17	23291281	23291281	A	T	exonic	Vmn2r114	.	nonsynonymous SNV	Vmn2r114:NM_001102584:exon6:c.T2224A:p.S742T	17qA3.3
chr17	23291283	23291283	C	T	exonic	Vmn2r114	.	nonsynonymous SNV	Vmn2r114:NM_001102584:exon6:c.G2222A:p.G741D	17qA3.3
chr17	23291285	23291285	T	C	exonic	Vmn2r114	.	synonymous SNV	Vmn2r114:NM_001102584:exon6:c.A2220G:p.K740K	17qA3.3
chr17	23291321	23291321	A	C	exonic	Vmn2r114	.	nonsynonymous SNV	Vmn2r114:NM_001102584:exon6:c.T2184G:p.H728Q	17qA3.3
chr17	23291322	23291322	T	A	exonic	Vmn2r114	.	nonsynonymous SNV	Vmn2r114:NM_001102584:exon6:c.A2183T:p.H728L	17qA3.3
chr17	23291338	23291338	C	A	exonic	Vmn2r114	.	nonsynonymous SNV	Vmn2r114:NM_001102584:exon6:c.G2167T:p.V723F	17qA3.3
chr17	23291353	23291353	C	G	exonic	Vmn2r114	.	nonsynonymous SNV	Vmn2r114:NM_001102584:exon6:c.G2152C:p.A718P	17qA3.3
chr17	23291365	23291365	C	T	exonic	Vmn2r114	.	nonsynonymous SNV	Vmn2r114:NM_001102584:exon6:c.G2140A:p.V714I	17qA3.3
chr17	23291369	23291369	A	T	exonic	Vmn2r114	.	stopgain	Vmn2r114:NM_001102584:exon6:c.T2136A:p.C712X	17qA3.3
chr17	23291398	23291398	A	T	exonic	Vmn2r114	.	nonsynonymous SNV	Vmn2r114:NM_001102584:exon6:c.T2107A:p.F703I	17qA3.3
chr17	23291530	23291530	C	T	exonic	Vmn2r114	.	nonsynonymous SNV	Vmn2r114:NM_001102584:exon6:c.G1975A:p.V659I	17qA3.3
chr17	23291539	23291539	T	C	exonic	Vmn2r114	.	nonsynonymous SNV	Vmn2r114:NM_001102584:exon6:c.A1966G:p.T656A	17qA3.3
chr17	23291609	23291609	A	G	exonic	Vmn2r114	.	synonymous SNV	Vmn2r114:NM_001102584:exon6:c.T1896C:p.I632I	17qA3.3
chr17	23291645	23291645	G	C	exonic	Vmn2r114	.	nonsynonymous SNV	Vmn2r114:NM_001102584:exon6:c.C1860G:p.N620K	17qA3.3
chr17	23291665	23291665	G	A	exonic	Vmn2r114	.	nonsynonymous SNV	Vmn2r114:NM_001102584:exon6:c.C1840T:p.P614S	17qA3.3
chr17	23291782	23291782	T	C	exonic	Vmn2r114	.	nonsynonymous SNV	Vmn2r114:NM_001102584:exon6:c.A1723G:p.T575A	17qA3.3
chr17	23291787	23291787	C	T	exonic	Vmn2r114	.	nonsynonymous SNV	Vmn2r114:NM_001102584:exon6:c.G1718A:p.R573H	17qA3.3
chr17	23291807	23291807	T	A	exonic	Vmn2r114	.	synonymous SNV	Vmn2r114:NM_001102584:exon6:c.A1698T:p.T566T	17qA3.3
chr17	23291821	23291821	G	T	exonic	Vmn2r114	.	nonsynonymous SNV	Vmn2r114:NM_001102584:exon6:c.C1684A:p.Q562K	17qA3.3
chr17	23291829	23291829	A	G	exonic	Vmn2r114	.	nonsynonymous SNV	Vmn2r114:NM_001102584:exon6:c.T1676C:p.L559P	17qA3.3
chr17	23291838	23291838	A	G	exonic	Vmn2r114	.	nonsynonymous SNV	Vmn2r114:NM_001102584:exon6:c.T1667C:p.V556A	17qA3.3
chr17	23291839	23291839	C	A	exonic	Vmn2r114	.	nonsynonymous SNV	Vmn2r114:NM_001102584:exon6:c.G1666T:p.V556F	17qA3.3
chr17	23291841	23291841	C	A	exonic	Vmn2r114	.	nonsynonymous SNV	Vmn2r114:NM_001102584:exon6:c.G1664T:p.C555F	17qA3.3
chr17	23308078	23308078	T	C	exonic	Vmn2r114	.	synonymous SNV	Vmn2r114:NM_001102584:exon4:c.A1479G:p.Q493Q	17qA3.3
chr17	23308096	23308096	G	A	exonic	Vmn2r114	.	synonymous SNV	Vmn2r114:NM_001102584:exon4:c.C1461T:p.Y487Y	17qA3.3
chr17	23308117	23308117	T	G	exonic	Vmn2r114	.	nonsynonymous SNV	Vmn2r114:NM_001102584:exon4:c.A1440C:p.K480N	17qA3.3
chr17	23308130	23308130	T	C	exonic	Vmn2r114	.	nonsynonymous SNV	Vmn2r114:NM_001102584:exon4:c.A1427G:p.E476G	17qA3.3
chr17	23308175	23308175	T	A	exonic	Vmn2r114	.	nonsynonymous SNV	Vmn2r114:NM_001102584:exon4:c.A1382T:p.E461V	17qA3.3
chr17	23308177	23308177	C	T	exonic	Vmn2r114	.	synonymous SNV	Vmn2r114:NM_001102584:exon4:c.G1380A:p.Q460Q	17qA3.3
chr17	23308202	23308202	T	C	exonic	Vmn2r114	.	nonsynonymous SNV	Vmn2r114:NM_001102584:exon4:c.A1355G:p.N452S	17qA3.3
chr17	23308209	23308209	T	A	exonic	Vmn2r114	.	stopgain	Vmn2r114:NM_001102584:exon4:c.A1348T:p.R450X	17qA3.3
chr17	23308219	23308219	C	A	exonic	Vmn2r114	.	synonymous SNV	Vmn2r114:NM_001102584:exon4:c.G1338T:p.P446P	17qA3.3
chr17	23308231	23308231	C	G	exonic	Vmn2r114	.	nonsynonymous SNV	Vmn2r114:NM_001102584:exon4:c.G1326C:p.Q442H	17qA3.3
chr17	23308234	23308234	G	A	exonic	Vmn2r114	.	synonymous SNV	Vmn2r114:NM_001102584:exon4:c.C1323T:p.T441T	17qA3.3
chr17	23308250	23308250	G	A	exonic	Vmn2r114	.	nonsynonymous SNV	Vmn2r114:NM_001102584:exon4:c.C1307T:p.S436F	17qA3.3
chr17	23310532	23310532	G	A	exonic	Vmn2r114	.	synonymous SNV	Vmn2r114:NM_001102584:exon3:c.C595T:p.L199L	17qA3.3
chr17	23310535	23310535	C	T	exonic	Vmn2r114	.	nonsynonymous SNV	Vmn2r114:NM_001102584:exon3:c.G592A:p.A198T	17qA3.3
chr17	23310578	23310578	G	A	exonic	Vmn2r114	.	synonymous SNV	Vmn2r114:NM_001102584:exon3:c.C549T:p.P183P	17qA3.3
chr17	23310592	23310592	G	A	exonic	Vmn2r114	.	nonsynonymous SNV	Vmn2r114:NM_001102584:exon3:c.C535T:p.H179Y	17qA3.3
chr17	23310602	23310602	G	A	exonic	Vmn2r114	.	synonymous SNV	Vmn2r114:NM_001102584:exon3:c.C525T:p.V175V	17qA3.3
chr17	23310604	23310604	C	A	exonic	Vmn2r114	.	nonsynonymous SNV	Vmn2r114:NM_001102584:exon3:c.G523T:p.V175F	17qA3.3
chr17	23310616	23310616	G	T	exonic	Vmn2r114	.	nonsynonymous SNV	Vmn2r114:NM_001102584:exon3:c.C511A:p.P171T	17qA3.3
chr17	23311032	23311032	G	A	exonic	Vmn2r114	.	nonsynonymous SNV	Vmn2r114:NM_001102584:exon2:c.C400T:p.L134F	17qA3.3
chr17	23311042	23311042	C	G	exonic	Vmn2r114	.	nonsynonymous SNV	Vmn2r114:NM_001102584:exon2:c.G390C:p.M130I	17qA3.3
chr17	23311052	23311052	G	A	exonic	Vmn2r114	.	nonsynonymous SNV	Vmn2r114:NM_001102584:exon2:c.C380T:p.P127L	17qA3.3
chr17	23311071	23311071	G	A	exonic	Vmn2r114	.	stopgain	Vmn2r114:NM_001102584:exon2:c.C361T:p.Q121X	17qA3.3
chr17	23311081	23311081	G	A	exonic	Vmn2r114	.	synonymous SNV	Vmn2r114:NM_001102584:exon2:c.C351T:p.H117H	17qA3.3
chr17	23312128	23312128	T	A	exonic	Vmn2r114	.	synonymous SNV	Vmn2r114:NM_001102584:exon1:c.A186T:p.I62I	17qA3.3
chr17	23312135	23312135	C	T	exonic	Vmn2r114	.	nonsynonymous SNV	Vmn2r114:NM_001102584:exon1:c.G179A:p.S60N	17qA3.3
chr17	23312143	23312143	C	T	exonic	Vmn2r114	.	synonymous SNV	Vmn2r114:NM_001102584:exon1:c.G171A:p.E57E	17qA3.3
chr17	23312158	23312158	C	A	exonic	Vmn2r114	.	synonymous SNV	Vmn2r114:NM_001102584:exon1:c.G156T:p.R52R	17qA3.3
chr17	23312160	23312160	G	A	exonic	Vmn2r114	.	nonsynonymous SNV	Vmn2r114:NM_001102584:exon1:c.C154T:p.R52W	17qA3.3
chr17	23312163	23312163	G	T	exonic	Vmn2r114	.	nonsynonymous SNV	Vmn2r114:NM_001102584:exon1:c.C151A:p.Q51K	17qA3.3
chr17	23345068	23345068	C	T	exonic	Vmn2r115	.	synonymous SNV	Vmn2r115:NM_001104579:exon2:c.C213T:p.N71N	17qA3.3
chr17	23345107	23345107	A	G	exonic	Vmn2r115	.	synonymous SNV	Vmn2r115:NM_001104579:exon2:c.A252G:p.E84E	17qA3.3
chr17	23345115	23345115	T	G	exonic	Vmn2r115	.	nonsynonymous SNV	Vmn2r115:NM_001104579:exon2:c.T260G:p.M87R	17qA3.3
chr17	23345153	23345153	G	A	exonic	Vmn2r115	.	nonsynonymous SNV	Vmn2r115:NM_001104579:exon2:c.G298A:p.E100K	17qA3.3
chr17	23345154	23345154	A	C	exonic	Vmn2r115	.	nonsynonymous SNV	Vmn2r115:NM_001104579:exon2:c.A299C:p.E100A	17qA3.3
chr17	23345156	23345156	T	C	exonic	Vmn2r115	.	nonsynonymous SNV	Vmn2r115:NM_001104579:exon2:c.T301C:p.F101L	17qA3.3
chr17	23346176	23346176	C	T	exonic	Vmn2r115	.	nonsynonymous SNV	Vmn2r115:NM_001104579:exon3:c.C1036T:p.P346S	17qA3.3
chr17	23346206	23346206	A	T	exonic	Vmn2r115	.	nonsynonymous SNV	Vmn2r115:NM_001104579:exon3:c.A1066T:p.M356L	17qA3.3
chr17	23346227	23346227	T	C	exonic	Vmn2r115	.	nonsynonymous SNV	Vmn2r115:NM_001104579:exon3:c.T1087C:p.S363P	17qA3.3
chr17	23346264	23346264	C	T	exonic	Vmn2r115	.	nonsynonymous SNV	Vmn2r115:NM_001104579:exon3:c.C1124T:p.S375F	17qA3.3
chr17	23346265	23346265	C	A	exonic	Vmn2r115	.	synonymous SNV	Vmn2r115:NM_001104579:exon3:c.C1125A:p.S375S	17qA3.3
chr17	23346278	23346278	G	A	exonic	Vmn2r115	.	nonsynonymous SNV	Vmn2r115:NM_001104579:exon3:c.G1138A:p.E380K	17qA3.3
chr17	23346339	23346339	A	C	exonic	Vmn2r115	.	nonsynonymous SNV	Vmn2r115:NM_001104579:exon3:c.A1199C:p.N400T	17qA3.3
chr17	23346346	23346346	T	G	exonic	Vmn2r115	.	synonymous SNV	Vmn2r115:NM_001104579:exon3:c.T1206G:p.V402V	17qA3.3
chr17	23346362	23346362	G	A	exonic	Vmn2r115	.	nonsynonymous SNV	Vmn2r115:NM_001104579:exon3:c.G1222A:p.A408T	17qA3.3
chr17	23346371	23346371	C	T	exonic	Vmn2r115	.	stopgain	Vmn2r115:NM_001104579:exon3:c.C1231T:p.Q411X	17qA3.3
chr17	23346372	23346372	A	G	exonic	Vmn2r115	.	nonsynonymous SNV	Vmn2r115:NM_001104579:exon3:c.A1232G:p.Q411R	17qA3.3
chr17	23346438	23346438	A	G	exonic	Vmn2r115	.	nonsynonymous SNV	Vmn2r115:NM_001104579:exon3:c.A1298G:p.K433R	17qA3.3
chr17	23347825	23347825	C	T	exonic	Vmn2r115	.	nonsynonymous SNV	Vmn2r115:NM_001104579:exon4:c.C1310T:p.S437F	17qA3.3
chr17	23347841	23347841	C	T	exonic	Vmn2r115	.	synonymous SNV	Vmn2r115:NM_001104579:exon4:c.C1326T:p.T442T	17qA3.3
chr17	23347844	23347844	G	C	exonic	Vmn2r115	.	nonsynonymous SNV	Vmn2r115:NM_001104579:exon4:c.G1329C:p.Q443H	17qA3.3
chr17	23347849	23347849	T	C	exonic	Vmn2r115	.	nonsynonymous SNV	Vmn2r115:NM_001104579:exon4:c.T1334C:p.I445T	17qA3.3
chr17	23347866	23347866	A	T	exonic	Vmn2r115	.	stopgain	Vmn2r115:NM_001104579:exon4:c.A1351T:p.R451X	17qA3.3
chr17	23347873	23347873	A	G	exonic	Vmn2r115	.	nonsynonymous SNV	Vmn2r115:NM_001104579:exon4:c.A1358G:p.N453S	17qA3.3
chr17	23347898	23347898	G	A	exonic	Vmn2r115	.	synonymous SNV	Vmn2r115:NM_001104579:exon4:c.G1383A:p.Q461Q	17qA3.3
chr17	23347900	23347900	A	T	exonic	Vmn2r115	.	nonsynonymous SNV	Vmn2r115:NM_001104579:exon4:c.A1385T:p.E462V	17qA3.3
chr17	23347937	23347937	T	G	exonic	Vmn2r115	.	nonsynonymous SNV	Vmn2r115:NM_001104579:exon4:c.T1422G:p.H474Q	17qA3.3
chr17	23347947	23347947	T	C	exonic	Vmn2r115	.	nonsynonymous SNV	Vmn2r115:NM_001104579:exon4:c.T1432C:p.F478L	17qA3.3
chr17	23347951	23347951	A	G	exonic	Vmn2r115	.	nonsynonymous SNV	Vmn2r115:NM_001104579:exon4:c.A1436G:p.K479R	17qA3.3
chr17	23347958	23347958	A	C	exonic	Vmn2r115	.	nonsynonymous SNV	Vmn2r115:NM_001104579:exon4:c.A1443C:p.K481N	17qA3.3
chr17	23347964	23347964	G	A	exonic	Vmn2r115	.	synonymous SNV	Vmn2r115:NM_001104579:exon4:c.G1449A:p.G483G	17qA3.3
chr17	23347967	23347967	A	G	exonic	Vmn2r115	.	nonsynonymous SNV	Vmn2r115:NM_001104579:exon4:c.A1452G:p.I484M	17qA3.3
chr17	23348005	23348005	T	C	exonic	Vmn2r115	.	nonsynonymous SNV	Vmn2r115:NM_001104579:exon4:c.T1490C:p.L497S	17qA3.3
chr17	23348034	23348034	G	T	exonic	Vmn2r115	.	stopgain	Vmn2r115:NM_001104579:exon4:c.G1519T:p.G507X	17qA3.3
chr17	23348040	23348040	G	A	exonic	Vmn2r115	.	nonsynonymous SNV	Vmn2r115:NM_001104579:exon4:c.G1525A:p.A509T	17qA3.3
chr17	23356960	23356960	A	G	exonic	Vmn2r115	.	nonsynonymous SNV	Vmn2r115:NM_001104579:exon5:c.A1531G:p.M511V	17qA3.3
chr17	23357050	23357050	C	T	exonic	Vmn2r115	.	nonsynonymous SNV	Vmn2r115:NM_001104579:exon5:c.C1621T:p.P541S	17qA3.3
chr17	23357052	23357052	T	C	exonic	Vmn2r115	.	synonymous SNV	Vmn2r115:NM_001104579:exon5:c.T1623C:p.P541P	17qA3.3
chr17	23357055	23357055	T	C	exonic	Vmn2r115	.	synonymous SNV	Vmn2r115:NM_001104579:exon5:c.T1626C:p.C542C	17qA3.3
chr17	23357076	23357076	C	T	exonic	Vmn2r115	.	synonymous SNV	Vmn2r115:NM_001104579:exon5:c.C1647T:p.N549N	17qA3.3
chr17	23359221	23359221	G	T	exonic	Vmn2r115	.	nonsynonymous SNV	Vmn2r115:NM_001104579:exon6:c.G1667T:p.C556F	17qA3.3
chr17	23359223	23359223	G	T	exonic	Vmn2r115	.	nonsynonymous SNV	Vmn2r115:NM_001104579:exon6:c.G1669T:p.V557F	17qA3.3
chr17	23359224	23359224	T	C	exonic	Vmn2r115	.	nonsynonymous SNV	Vmn2r115:NM_001104579:exon6:c.T1670C:p.V557A	17qA3.3
chr17	23359233	23359233	T	C	exonic	Vmn2r115	.	nonsynonymous SNV	Vmn2r115:NM_001104579:exon6:c.T1679C:p.L560P	17qA3.3
chr17	23359241	23359241	C	A	exonic	Vmn2r115	.	nonsynonymous SNV	Vmn2r115:NM_001104579:exon6:c.C1687A:p.Q563K	17qA3.3
chr17	23359255	23359255	A	T	exonic	Vmn2r115	.	synonymous SNV	Vmn2r115:NM_001104579:exon6:c.A1701T:p.T567T	17qA3.3
chr17	23359275	23359275	G	A	exonic	Vmn2r115	.	nonsynonymous SNV	Vmn2r115:NM_001104579:exon6:c.G1721A:p.R574H	17qA3.3
chr17	23359280	23359280	A	G	exonic	Vmn2r115	.	nonsynonymous SNV	Vmn2r115:NM_001104579:exon6:c.A1726G:p.I576V	17qA3.3
chr17	23359281	23359281	T	C	exonic	Vmn2r115	.	nonsynonymous SNV	Vmn2r115:NM_001104579:exon6:c.T1727C:p.I576T	17qA3.3
chr17	23359297	23359297	C	T	exonic	Vmn2r115	.	synonymous SNV	Vmn2r115:NM_001104579:exon6:c.C1743T:p.S581S	17qA3.3
chr17	23359307	23359307	C	T	exonic	Vmn2r115	.	nonsynonymous SNV	Vmn2r115:NM_001104579:exon6:c.C1753T:p.P585S	17qA3.3
chr17	23359310	23359310	T	C	exonic	Vmn2r115	.	synonymous SNV	Vmn2r115:NM_001104579:exon6:c.T1756C:p.L586L	17qA3.3
chr17	23359315	23359315	G	T	exonic	Vmn2r115	.	synonymous SNV	Vmn2r115:NM_001104579:exon6:c.G1761T:p.G587G	17qA3.3
chr17	23359326	23359326	C	T	exonic	Vmn2r115	.	nonsynonymous SNV	Vmn2r115:NM_001104579:exon6:c.C1772T:p.S591F	17qA3.3
chr17	23359349	23359349	G	T	exonic	Vmn2r115	.	nonsynonymous SNV	Vmn2r115:NM_001104579:exon6:c.G1795T:p.A599S	17qA3.3
chr17	23359359	23359359	T	C	exonic	Vmn2r115	.	nonsynonymous SNV	Vmn2r115:NM_001104579:exon6:c.T1805C:p.I602T	17qA3.3
chr17	23359397	23359397	C	T	exonic	Vmn2r115	.	nonsynonymous SNV	Vmn2r115:NM_001104579:exon6:c.C1843T:p.P615S	17qA3.3
chr17	23359417	23359417	C	G	exonic	Vmn2r115	.	nonsynonymous SNV	Vmn2r115:NM_001104579:exon6:c.C1863G:p.N621K	17qA3.3
chr17	23359450	23359450	A	C	exonic	Vmn2r115	.	synonymous SNV	Vmn2r115:NM_001104579:exon6:c.A1896C:p.L632L	17qA3.3
chr17	23359533	23359533	T	C	exonic	Vmn2r115	.	nonsynonymous SNV	Vmn2r115:NM_001104579:exon6:c.T1979C:p.I660T	17qA3.3
chr17	23359693	23359693	T	A	exonic	Vmn2r115	.	stopgain	Vmn2r115:NM_001104579:exon6:c.T2139A:p.C713X	17qA3.3
chr17	23359697	23359697	G	A	exonic	Vmn2r115	.	nonsynonymous SNV	Vmn2r115:NM_001104579:exon6:c.G2143A:p.V715I	17qA3.3
chr17	23359709	23359709	G	C	exonic	Vmn2r115	.	nonsynonymous SNV	Vmn2r115:NM_001104579:exon6:c.G2155C:p.A719P	17qA3.3
chr17	23359724	23359724	G	T	exonic	Vmn2r115	.	nonsynonymous SNV	Vmn2r115:NM_001104579:exon6:c.G2170T:p.V724F	17qA3.3
chr17	23359737	23359737	G	C	exonic	Vmn2r115	.	nonsynonymous SNV	Vmn2r115:NM_001104579:exon6:c.G2183C:p.G728A	17qA3.3
chr17	23359740	23359740	A	T	exonic	Vmn2r115	.	nonsynonymous SNV	Vmn2r115:NM_001104579:exon6:c.A2186T:p.Q729L	17qA3.3
chr17	23359741	23359741	A	G	exonic	Vmn2r115	.	synonymous SNV	Vmn2r115:NM_001104579:exon6:c.A2187G:p.Q729Q	17qA3.3
chr17	23359779	23359779	G	A	exonic	Vmn2r115	.	nonsynonymous SNV	Vmn2r115:NM_001104579:exon6:c.G2225A:p.G742D	17qA3.3
chr17	23359865	23359865	C	T	exonic	Vmn2r115	.	nonsynonymous SNV	Vmn2r115:NM_001104579:exon6:c.C2311T:p.L771F	17qA3.3
chr17	23359881	23359881	A	T	exonic	Vmn2r115	.	nonsynonymous SNV	Vmn2r115:NM_001104579:exon6:c.A2327T:p.N776I	17qA3.3
chr17	23359888	23359888	T	C	exonic	Vmn2r115	.	synonymous SNV	Vmn2r115:NM_001104579:exon6:c.T2334C:p.A778A	17qA3.3
chr17	23359912	23359912	G	T	exonic	Vmn2r115	.	synonymous SNV	Vmn2r115:NM_001104579:exon6:c.G2358T:p.L786L	17qA3.3
chr17	23359933	23359933	C	T	exonic	Vmn2r115	.	synonymous SNV	Vmn2r115:NM_001104579:exon6:c.C2379T:p.V793V	17qA3.3
chr17	23359942	23359942	C	A	exonic	Vmn2r115	.	synonymous SNV	Vmn2r115:NM_001104579:exon6:c.C2388A:p.I796I	17qA3.3
chr17	23359956	23359956	G	A	exonic	Vmn2r115	.	nonsynonymous SNV	Vmn2r115:NM_001104579:exon6:c.G2402A:p.S801N	17qA3.3
chr17	23359984	23359984	G	A	exonic	Vmn2r115	.	synonymous SNV	Vmn2r115:NM_001104579:exon6:c.G2430A:p.V810V	17qA3.3
chr17	23360006	23360006	T	A	exonic	Vmn2r115	.	nonsynonymous SNV	Vmn2r115:NM_001104579:exon6:c.T2452A:p.S818T	17qA3.3
chr17	23360025	23360025	G	A	exonic	Vmn2r115	.	nonsynonymous SNV	Vmn2r115:NM_001104579:exon6:c.G2471A:p.G824E	17qA3.3
chr17	23360079	23360079	C	A	exonic	Vmn2r115	.	nonsynonymous SNV	Vmn2r115:NM_001104579:exon6:c.C2525A:p.S842Y	17qA3.3
chr17	23360095	23360095	G	A	exonic	Vmn2r115	.	synonymous SNV	Vmn2r115:NM_001104579:exon6:c.G2541A:p.R847R	17qA3.3
chr17	23360111	23360111	A	C	exonic	Vmn2r115	.	nonsynonymous SNV	Vmn2r115:NM_001104579:exon6:c.A2557C:p.N853H	17qA3.3
chr17	23360118	23360118	G	A	exonic	Vmn2r115	.	nonsynonymous SNV	Vmn2r115:NM_001104579:exon6:c.G2564A:p.R855H	17qA3.3
chr17	23360121	23360121	G	T	exonic	Vmn2r115	.	nonsynonymous SNV	Vmn2r115:NM_001104579:exon6:c.G2567T:p.S856I	17qA3.3
chr17	23401429	23401429	T	A	exonic	Vmn2r116	.	stopgain	Vmn2r116:NM_001104580:exon6:c.T2136A:p.C712X	17qA3.3
chr17	23401433	23401433	G	A	exonic	Vmn2r116	.	nonsynonymous SNV	Vmn2r116:NM_001104580:exon6:c.G2140A:p.V714I	17qA3.3
chr17	23401442	23401442	A	G	exonic	Vmn2r116	.	nonsynonymous SNV	Vmn2r116:NM_001104580:exon6:c.A2149G:p.R717G	17qA3.3
chr17	23401445	23401445	G	C	exonic	Vmn2r116	.	nonsynonymous SNV	Vmn2r116:NM_001104580:exon6:c.G2152C:p.A718P	17qA3.3
chr17	23401476	23401476	A	T	exonic	Vmn2r116	.	nonsynonymous SNV	Vmn2r116:NM_001104580:exon6:c.A2183T:p.H728L	17qA3.3
chr17	23401477	23401477	T	G	exonic	Vmn2r116	.	nonsynonymous SNV	Vmn2r116:NM_001104580:exon6:c.T2184G:p.H728Q	17qA3.3
chr17	23401515	23401515	G	A	exonic	Vmn2r116	.	nonsynonymous SNV	Vmn2r116:NM_001104580:exon6:c.G2222A:p.G741D	17qA3.3
chr17	23401648	23401648	G	T	exonic	Vmn2r116	.	synonymous SNV	Vmn2r116:NM_001104580:exon6:c.G2355T:p.L785L	17qA3.3
chr17	23401678	23401678	C	A	exonic	Vmn2r116	.	synonymous SNV	Vmn2r116:NM_001104580:exon6:c.C2385A:p.I795I	17qA3.3
chr17	23401692	23401692	G	A	exonic	Vmn2r116	.	nonsynonymous SNV	Vmn2r116:NM_001104580:exon6:c.G2399A:p.S800N	17qA3.3
chr17	23401720	23401720	G	A	exonic	Vmn2r116	.	synonymous SNV	Vmn2r116:NM_001104580:exon6:c.G2427A:p.V809V	17qA3.3
chr17	23401741	23401741	T	C	exonic	Vmn2r116	.	synonymous SNV	Vmn2r116:NM_001104580:exon6:c.T2448C:p.A816A	17qA3.3
chr17	23401742	23401742	T	A	exonic	Vmn2r116	.	nonsynonymous SNV	Vmn2r116:NM_001104580:exon6:c.T2449A:p.S817T	17qA3.3
chr17	23471205	23471205	A	G	exonic	Vmn2r117	.	synonymous SNV	Vmn2r117:NM_001104581:exon5:c.T1626C:p.C542C	17qA3.3
chr17	23471210	23471210	G	A	exonic	Vmn2r117	.	nonsynonymous SNV	Vmn2r117:NM_001104581:exon5:c.C1621T:p.P541S	17qA3.3
chr17	23471241	23471241	G	A	exonic	Vmn2r117	.	synonymous SNV	Vmn2r117:NM_001104581:exon5:c.C1590T:p.D530D	17qA3.3
chr17	23471274	23471274	T	A	exonic	Vmn2r117	.	nonsynonymous SNV	Vmn2r117:NM_001104581:exon5:c.A1557T:p.E519D	17qA3.3
chr17	23475347	23475347	C	T	exonic	Vmn2r117	.	nonsynonymous SNV	Vmn2r117:NM_001104581:exon4:c.G1525A:p.A509T	17qA3.3
chr17	23475353	23475353	C	A	exonic	Vmn2r117	.	stopgain	Vmn2r117:NM_001104581:exon4:c.G1519T:p.G507X	17qA3.3
chr17	23475408	23475408	G	A	exonic	Vmn2r117	.	synonymous SNV	Vmn2r117:NM_001104581:exon4:c.C1464T:p.Y488Y	17qA3.3
chr17	23475429	23475429	T	G	exonic	Vmn2r117	.	nonsynonymous SNV	Vmn2r117:NM_001104581:exon4:c.A1443C:p.K481N	17qA3.3
chr17	23475483	23475483	T	C	exonic	Vmn2r117	.	synonymous SNV	Vmn2r117:NM_001104581:exon4:c.A1389G:p.E463E	17qA3.3
chr17	23475487	23475487	T	A	exonic	Vmn2r117	.	nonsynonymous SNV	Vmn2r117:NM_001104581:exon4:c.A1385T:p.E462V	17qA3.3
chr17	23475489	23475489	C	T	exonic	Vmn2r117	.	synonymous SNV	Vmn2r117:NM_001104581:exon4:c.G1383A:p.Q461Q	17qA3.3
chr17	23475500	23475500	T	C	exonic	Vmn2r117	.	nonsynonymous SNV	Vmn2r117:NM_001104581:exon4:c.A1372G:p.N458D	17qA3.3
chr17	23477613	23477613	A	G	exonic	Vmn2r117	.	synonymous SNV	Vmn2r117:NM_001104581:exon3:c.T819C:p.I273I	17qA3.3
chr17	23477616	23477616	G	A	exonic	Vmn2r117	.	synonymous SNV	Vmn2r117:NM_001104581:exon3:c.C816T:p.I272I	17qA3.3
chr17	23477618	23477618	T	A	exonic	Vmn2r117	.	nonsynonymous SNV	Vmn2r117:NM_001104581:exon3:c.A814T:p.I272F	17qA3.3
chr17	23477689	23477689	C	T	exonic	Vmn2r117	.	nonsynonymous SNV	Vmn2r117:NM_001104581:exon3:c.G743A:p.S248N	17qA3.3
chr17	23477691	23477691	C	T	exonic	Vmn2r117	.	nonsynonymous SNV	Vmn2r117:NM_001104581:exon3:c.G741A:p.M247I	17qA3.3
chr17	23477695	23477695	G	A	exonic	Vmn2r117	.	nonsynonymous SNV	Vmn2r117:NM_001104581:exon3:c.C737T:p.P246L	17qA3.3
chr17	23477705	23477705	T	C	exonic	Vmn2r117	.	nonsynonymous SNV	Vmn2r117:NM_001104581:exon3:c.A727G:p.N243D	17qA3.3
chr17	23477712	23477712	G	A	exonic	Vmn2r117	.	synonymous SNV	Vmn2r117:NM_001104581:exon3:c.C720T:p.A240A	17qA3.3
chr17	23477713	23477713	G	A	exonic	Vmn2r117	.	nonsynonymous SNV	Vmn2r117:NM_001104581:exon3:c.C719T:p.A240V	17qA3.3
chr17	23477723	23477723	C	G	exonic	Vmn2r117	.	nonsynonymous SNV	Vmn2r117:NM_001104581:exon3:c.G709C:p.V237L	17qA3.3
chr17	23477770	23477770	T	C	exonic	Vmn2r117	.	nonsynonymous SNV	Vmn2r117:NM_001104581:exon3:c.A662G:p.D221G	17qA3.3
chr17	23477773	23477773	T	C	exonic	Vmn2r117	.	nonsynonymous SNV	Vmn2r117:NM_001104581:exon3:c.A659G:p.E220G	17qA3.3
chr17	23477781	23477781	G	A	exonic	Vmn2r117	.	synonymous SNV	Vmn2r117:NM_001104581:exon3:c.C651T:p.D217D	17qA3.3
chr17	23477804	23477804	A	G	exonic	Vmn2r117	.	nonsynonymous SNV	Vmn2r117:NM_001104581:exon3:c.T628C:p.W210R	17qA3.3
chr17	23477811	23477811	A	G	exonic	Vmn2r117	.	synonymous SNV	Vmn2r117:NM_001104581:exon3:c.T621C:p.S207S	17qA3.3
chr17	23477837	23477837	G	A	exonic	Vmn2r117	.	synonymous SNV	Vmn2r117:NM_001104581:exon3:c.C595T:p.L199L	17qA3.3
chr17	23477840	23477840	C	T	exonic	Vmn2r117	.	nonsynonymous SNV	Vmn2r117:NM_001104581:exon3:c.G592A:p.A198T	17qA3.3
chr17	23477858	23477858	G	A	exonic	Vmn2r117	.	nonsynonymous SNV	Vmn2r117:NM_001104581:exon3:c.C574T:p.H192Y	17qA3.3
chr17	23478268	23478268	A	T	exonic	Vmn2r117	.	nonsynonymous SNV	Vmn2r117:NM_001104581:exon2:c.T449A:p.V150E	17qA3.3
chr17	23478305	23478305	C	T	exonic	Vmn2r117	.	nonsynonymous SNV	Vmn2r117:NM_001104581:exon2:c.G412A:p.A138T	17qA3.3
chr17	23478310	23478310	T	C	exonic	Vmn2r117	.	nonsynonymous SNV	Vmn2r117:NM_001104581:exon2:c.A407G:p.K136R	17qA3.3
chr17	23478327	23478327	C	G	exonic	Vmn2r117	.	nonsynonymous SNV	Vmn2r117:NM_001104581:exon2:c.G390C:p.M130I	17qA3.3
chr17	23478337	23478337	G	A	exonic	Vmn2r117	.	nonsynonymous SNV	Vmn2r117:NM_001104581:exon2:c.C380T:p.P127L	17qA3.3
chr17	23478504	23478504	G	A	exonic	Vmn2r117	.	synonymous SNV	Vmn2r117:NM_001104581:exon2:c.C213T:p.N71N	17qA3.3
chr17	23479401	23479401	T	C	exonic	Vmn2r117	.	nonsynonymous SNV	Vmn2r117:NM_001104581:exon1:c.A197G:p.Q66R	17qA3.3
chr17	23479402	23479402	G	A	exonic	Vmn2r117	.	stopgain	Vmn2r117:NM_001104581:exon1:c.C196T:p.Q66X	17qA3.3
chr17	23479412	23479412	T	A	exonic	Vmn2r117	.	synonymous SNV	Vmn2r117:NM_001104581:exon1:c.A186T:p.I62I	17qA3.3
chr17	23479419	23479419	C	T	exonic	Vmn2r117	.	nonsynonymous SNV	Vmn2r117:NM_001104581:exon1:c.G179A:p.S60N	17qA3.3
chr17	23479427	23479427	C	T	exonic	Vmn2r117	.	synonymous SNV	Vmn2r117:NM_001104581:exon1:c.G171A:p.E57E	17qA3.3
chr17	23479442	23479442	C	A	exonic	Vmn2r117	.	synonymous SNV	Vmn2r117:NM_001104581:exon1:c.G156T:p.R52R	17qA3.3
chr17	23479444	23479444	G	A	exonic	Vmn2r117	.	nonsynonymous SNV	Vmn2r117:NM_001104581:exon1:c.C154T:p.R52W	17qA3.3
chr17	23479447	23479447	G	T	exonic	Vmn2r117	.	nonsynonymous SNV	Vmn2r117:NM_001104581:exon1:c.C151A:p.Q51K	17qA3.3
chr17	23479456	23479456	G	A	exonic	Vmn2r117	.	nonsynonymous SNV	Vmn2r117:NM_001104581:exon1:c.C142T:p.H48Y	17qA3.3
chr17	23479461	23479461	A	C	exonic	Vmn2r117	.	nonsynonymous SNV	Vmn2r117:NM_001104581:exon1:c.T137G:p.M46R	17qA3.3
chr17	23479462	23479462	T	A	exonic	Vmn2r117	.	nonsynonymous SNV	Vmn2r117:NM_001104581:exon1:c.A136T:p.M46L	17qA3.3
chr17	23479469	23479469	G	T	exonic	Vmn2r117	.	stopgain	Vmn2r117:NM_001104581:exon1:c.C129A:p.C43X	17qA3.3
chr17	23479470	23479470	C	A	exonic	Vmn2r117	.	nonsynonymous SNV	Vmn2r117:NM_001104581:exon1:c.G128T:p.C43F	17qA3.3
chr17	23479481	23479481	C	T	exonic	Vmn2r117	.	synonymous SNV	Vmn2r117:NM_001104581:exon1:c.G117A:p.Q39Q	17qA3.3
chr17	23479483	23479483	G	T	exonic	Vmn2r117	.	nonsynonymous SNV	Vmn2r117:NM_001104581:exon1:c.C115A:p.Q39K	17qA3.3
chr17	23479497	23479497	T	A	exonic	Vmn2r117	.	nonsynonymous SNV	Vmn2r117:NM_001104581:exon1:c.A101T:p.D34V	17qA3.3
chr17	23479505	23479505	C	G	exonic	Vmn2r117	.	nonsynonymous SNV	Vmn2r117:NM_001104581:exon1:c.G93C:p.Q31H	17qA3.3
chr17	23479544	23479544	A	T	exonic	Vmn2r117	.	synonymous SNV	Vmn2r117:NM_001104581:exon1:c.T54A:p.S18S	17qA3.3
chr17	23479546	23479546	A	C	exonic	Vmn2r117	.	nonsynonymous SNV	Vmn2r117:NM_001104581:exon1:c.T52G:p.S18A	17qA3.3
chr17	24880751	24880751	A	G	exonic	Igfals	.	nonsynonymous SNV	Igfals:NM_001364895:exon2:c.A815G:p.D272G,Igfals:NM_001364896:exon2:c.A920G:p.D307G,Igfals:NM_008340:exon2:c.A815G:p.D272G	17qA3.3
chr17	24970575	24970575	T	A	exonic	Cramp1l	.	nonsynonymous SNV	Cramp1l:NM_020608:exon19:c.A3387T:p.E1129D	17qA3.3
chr17	29526500	29526500	A	G	exonic	Tmem217	.	synonymous SNV	Tmem217:NM_001162902:exon2:c.T255C:p.Y85Y,Tmem217:NM_001162901:exon3:c.T255C:p.Y85Y	17qA3.3
chr17	35425194	35425194	A	G	exonic	H2-Q6;H2-Q8	.	nonsynonymous SNV	H2-Q6:NM_001368741:exon2:c.A151G:p.N51D,H2-Q6:NM_001368742:exon2:c.A151G:p.N51D,H2-Q8:NM_023124:exon2:c.A151G:p.N51D,H2-Q6:NM_207648:exon2:c.A151G:p.N51D	17qB1
chr17	35425198	35425198	A	C	exonic	H2-Q6;H2-Q8	.	nonsynonymous SNV	H2-Q6:NM_001368741:exon2:c.A155C:p.K52T,H2-Q6:NM_001368742:exon2:c.A155C:p.K52T,H2-Q8:NM_023124:exon2:c.A155C:p.K52T,H2-Q6:NM_207648:exon2:c.A155C:p.K52T	17qB1
chr17	35440154	35440154	C	G	exonic	H2-Q7;H2-Q9	.	nonsynonymous SNV	H2-Q7:NM_001198560:exon3:c.C580G:p.Q194E,H2-Q7:NM_001198561:exon3:c.C580G:p.Q194E,H2-Q9:NM_001201460:exon3:c.C580G:p.Q194E,H2-Q7:NM_010394:exon3:c.C580G:p.Q194E	17qB1
chr17	36031864	36031864	C	G	exonic	H2-T23	.	synonymous SNV	H2-T23:NM_010398:exon3:c.G381C:p.G127G	17qB1
chr17	45568346	45568346	C	T	exonic	Hsp90ab1	.	nonsynonymous SNV	Hsp90ab1:NM_008302:exon10:c.G1948A:p.A650T	17qB3
chr17	45568347	45568347	T	G	exonic	Hsp90ab1	.	nonsynonymous SNV	Hsp90ab1:NM_008302:exon10:c.A1947C:p.K649N	17qB3
chr17	45568353	45568353	G	A	exonic	Hsp90ab1	.	synonymous SNV	Hsp90ab1:NM_008302:exon10:c.C1941T:p.N647N	17qB3
chr17	45568405	45568405	G	A	exonic	Hsp90ab1	.	nonsynonymous SNV	Hsp90ab1:NM_008302:exon10:c.C1889T:p.P630L	17qB3
chr17	45568409	45568409	T	A	exonic	Hsp90ab1	.	nonsynonymous SNV	Hsp90ab1:NM_008302:exon10:c.A1885T:p.N629Y	17qB3
chr17	45568416	45568416	C	T	exonic	Hsp90ab1	.	synonymous SNV	Hsp90ab1:NM_008302:exon10:c.G1878A:p.L626L	17qB3
chr17	45568434	45568434	C	T	exonic	Hsp90ab1	.	nonsynonymous SNV	Hsp90ab1:NM_008302:exon10:c.G1860A:p.M620I	17qB3
chr17	45568435	45568435	A	G	exonic	Hsp90ab1	.	nonsynonymous SNV	Hsp90ab1:NM_008302:exon10:c.T1859C:p.M620T	17qB3
chr17	45568456	45568456	T	C	exonic	Hsp90ab1	.	nonsynonymous SNV	Hsp90ab1:NM_008302:exon10:c.A1838G:p.D613G	17qB3
chr17	45568460	45568460	G	A	exonic	Hsp90ab1	.	stopgain	Hsp90ab1:NM_008302:exon10:c.C1834T:p.R612X	17qB3
chr17	45568465	45568465	G	A	exonic	Hsp90ab1	.	nonsynonymous SNV	Hsp90ab1:NM_008302:exon10:c.C1829T:p.A610V	17qB3
chr17	45568474	45568474	T	G	exonic	Hsp90ab1	.	nonsynonymous SNV	Hsp90ab1:NM_008302:exon10:c.A1820C:p.K607T	17qB3
chr17	45568482	45568482	C	G	exonic	Hsp90ab1	.	synonymous SNV	Hsp90ab1:NM_008302:exon10:c.G1812C:p.R604R	17qB3
chr17	45568484	45568484	G	A	exonic	Hsp90ab1	.	nonsynonymous SNV	Hsp90ab1:NM_008302:exon10:c.C1810T:p.R604W	17qB3
chr17	45568493	45568493	T	C	exonic	Hsp90ab1	.	nonsynonymous SNV	Hsp90ab1:NM_008302:exon10:c.A1801G:p.N601D	17qB3
chr17	45568503	45568503	G	A	exonic	Hsp90ab1	.	synonymous SNV	Hsp90ab1:NM_008302:exon10:c.C1791T:p.G597G	17qB3
chr17	45568520	45568520	C	T	exonic	Hsp90ab1	.	nonsynonymous SNV	Hsp90ab1:NM_008302:exon10:c.G1774A:p.V592M	17qB3
chr17	45568530	45568530	G	C	exonic	Hsp90ab1	.	synonymous SNV	Hsp90ab1:NM_008302:exon10:c.C1764G:p.P588P	17qB3
chr17	45568531	45568531	G	T	exonic	Hsp90ab1	.	nonsynonymous SNV	Hsp90ab1:NM_008302:exon10:c.C1763A:p.P588H	17qB3
chr17	45568532	45568532	G	A	exonic	Hsp90ab1	.	nonsynonymous SNV	Hsp90ab1:NM_008302:exon10:c.C1762T:p.P588S	17qB3
chr17	45568541	45568541	C	T	exonic	Hsp90ab1	.	nonsynonymous SNV	Hsp90ab1:NM_008302:exon10:c.G1753A:p.V585M	17qB3
chr17	45568544	45568544	G	A	exonic	Hsp90ab1	.	nonsynonymous SNV	Hsp90ab1:NM_008302:exon10:c.C1750T:p.L584F	17qB3
chr17	47400410	47400410	T	C	exonic	Guca1a	.	nonsynonymous SNV	Guca1a:NM_008189:exon1:c.A10G:p.I4V	17qC
chr17	49891785	49891785	A	C	exonic	Kif6	.	nonsynonymous SNV	Kif6:NM_177052:exon18:c.A2036C:p.E679A	17qC
chr17	52961850	52961850	A	T	exonic	Kcnh8	.	nonsynonymous SNV	Kcnh8:NM_001031811:exon15:c.A2594T:p.Q865L	17qC
chr17	56563608	56563608	C	G	exonic	Safb2	.	nonsynonymous SNV	Safb2:NM_001029979:exon19:c.G2665C:p.A889P,Safb2:NM_001355463:exon19:c.G2668C:p.A890P	17qD
chr17	57204108	57204108	C	G	exonic	C3	.	nonsynonymous SNV	C3:NM_009778:exon41:c.G4897C:p.E1633Q	17qD
chr17	64292885	64292885	G	C	exonic	Pja2	.	nonsynonymous SNV	Pja2:NM_144859:exon5:c.C1417G:p.L473V,Pja2:NM_001025309:exon6:c.C1603G:p.L535V	17qE1.1
chr17	67752883	67752883	G	A	exonic	Lama1	.	nonsynonymous SNV	Lama1:NM_008480:exon14:c.G1966A:p.D656N	17qE1.1
chr17	71704797	71704797	A	C	exonic	Togaram2	.	nonsynonymous SNV	Togaram2:NM_177087:exon11:c.A1470C:p.E490D	17qE1.3
chr18	16624257	16624257	A	G	exonic	Cdh2	.	synonymous SNV	Cdh2:NM_007664:exon13:c.T2103C:p.C701C	18qA1
chr18	16624787	16624787	C	T	exonic	Cdh2	.	synonymous SNV	Cdh2:NM_007664:exon12:c.G1908A:p.P636P	18qA1
chr18	16624865	16624865	C	T	exonic	Cdh2	.	synonymous SNV	Cdh2:NM_007664:exon12:c.G1830A:p.A610A	18qA1
chr18	20043732	20043732	C	A	exonic	Dsc2	.	synonymous SNV	Dsc2:NM_001317365:exon9:c.G1257T:p.V419V,Dsc2:NM_013505:exon9:c.G1257T:p.V419V,Dsc2:NM_001317363:exon10:c.G828T:p.V276V	18qA2
chr18	20281905	20281905	C	A	exonic	Dsg1c	.	synonymous SNV	Dsg1c:NM_181680:exon14:c.C1858A:p.R620R	18qA2
chr18	20510405	20510405	T	C	exonic	Dsg3	.	nonsynonymous SNV	Dsg3:NM_030596:exon1:c.T31C:p.S11P	18qA2
chr18	20519784	20519784	G	C	exonic	Dsg3	.	nonsynonymous SNV	Dsg3:NM_030596:exon2:c.G66C:p.Q22H	18qA2
chr18	20520484	20520484	C	A	exonic	Dsg3	.	nonsynonymous SNV	Dsg3:NM_030596:exon3:c.C86A:p.P29Q	18qA2
chr18	20524657	20524657	T	C	exonic	Dsg3	.	synonymous SNV	Dsg3:NM_030596:exon7:c.T783C:p.N261N	18qA2
chr18	20524681	20524681	G	C	exonic	Dsg3	.	nonsynonymous SNV	Dsg3:NM_030596:exon7:c.G807C:p.E269D	18qA2
chr18	20525155	20525155	A	G	exonic	Dsg3	.	synonymous SNV	Dsg3:NM_030596:exon8:c.A822G:p.A274A	18qA2
chr18	20525170	20525170	T	C	exonic	Dsg3	.	synonymous SNV	Dsg3:NM_030596:exon8:c.T837C:p.N279N	18qA2
chr18	20525194	20525194	A	G	exonic	Dsg3	.	synonymous SNV	Dsg3:NM_030596:exon8:c.A861G:p.R287R	18qA2
chr18	20525233	20525233	T	C	exonic	Dsg3	.	synonymous SNV	Dsg3:NM_030596:exon8:c.T900C:p.N300N	18qA2
chr18	20527613	20527613	T	C	exonic	Dsg3	.	synonymous SNV	Dsg3:NM_030596:exon9:c.T1008C:p.D336D	18qA2
chr18	20527649	20527649	T	C	exonic	Dsg3	.	synonymous SNV	Dsg3:NM_030596:exon9:c.T1044C:p.A348A	18qA2
chr18	20529065	20529065	T	C	exonic	Dsg3	.	synonymous SNV	Dsg3:NM_030596:exon10:c.T1386C:p.I462I	18qA2
chr18	20539748	20539748	T	C	exonic	Dsg3	.	synonymous SNV	Dsg3:NM_030596:exon16:c.T2475C:p.D825D	18qA2
chr18	20540105	20540105	T	C	exonic	Dsg3	.	synonymous SNV	Dsg3:NM_030596:exon16:c.T2832C:p.V944V	18qA2
chr18	20573509	20573509	C	T	exonic	Dsg2	.	synonymous SNV	Dsg2:NM_007883:exon2:c.C81T:p.N27N	18qA2
chr18	20595967	20595967	G	A	exonic	Dsg2	.	synonymous SNV	Dsg2:NM_007883:exon13:c.G1902A:p.P634P	18qA2
chr18	20828565	20828565	A	G	exonic	Trappc8	.	synonymous SNV	Trappc8:NM_001361188:exon25:c.T3600C:p.S1200S,Trappc8:NM_001379370:exon25:c.T3642C:p.S1214S,Trappc8:NM_177038:exon25:c.T3645C:p.S1215S	18qA2
chr18	20847140	20847140	C	T	exonic	Trappc8	.	synonymous SNV	Trappc8:NM_001361188:exon15:c.G2190A:p.R730R,Trappc8:NM_001379370:exon15:c.G2232A:p.R744R,Trappc8:NM_029491:exon15:c.G2235A:p.R745R,Trappc8:NM_177038:exon15:c.G2235A:p.R745R	18qA2
chr18	20863492	20863492	T	C	exonic	Trappc8	.	synonymous SNV	Trappc8:NM_001361188:exon9:c.A1320G:p.A440A,Trappc8:NM_001379370:exon9:c.A1362G:p.A454A,Trappc8:NM_029491:exon9:c.A1365G:p.A455A,Trappc8:NM_177038:exon9:c.A1365G:p.A455A	18qA2
chr18	21652843	21652843	A	C	exonic	4930426D05Rik	.	synonymous SNV	4930426D05Rik:NM_001271580:exon2:c.A69C:p.R23R	18qA2
chr18	24002948	24002948	C	A	exonic	Zfp35	.	nonsynonymous SNV	Zfp35:NM_011755:exon3:c.C348A:p.S116R	18qA2
chr18	24002950	24002950	C	A	exonic	Zfp35	.	stopgain	Zfp35:NM_011755:exon3:c.C350A:p.S117X	18qA2
chr18	37743868	37743868	G	C	exonic	Pcdhgb6	.	nonsynonymous SNV	Pcdhgb6:NM_033578:exon1:c.G1628C:p.S543T	18qB3
chr18	57293890	57293890	C	T	exonic	Megf10	.	synonymous SNV	Megf10:NM_001001979:exon25:c.C3279T:p.H1093H	18qD3
chr18	57937757	57937757	C	T	exonic	Slc12a2	.	synonymous SNV	Slc12a2:NM_009194:exon23:c.C3180T:p.D1060D	18qD3
chr18	58026516	58026516	G	A	exonic	Fbn2	.	synonymous SNV	Fbn2:NM_010181:exon57:c.C7140T:p.F2380F	18qD3
chr18	58035899	58035899	T	C	exonic	Fbn2	.	synonymous SNV	Fbn2:NM_010181:exon54:c.A6807G:p.E2269E	18qD3
chr18	58035902	58035902	A	G	exonic	Fbn2	.	synonymous SNV	Fbn2:NM_010181:exon54:c.T6804C:p.Y2268Y	18qD3
chr18	58035911	58035911	G	A	exonic	Fbn2	.	synonymous SNV	Fbn2:NM_010181:exon54:c.C6795T:p.F2265F	18qD3
chr18	58035926	58035926	T	G	exonic	Fbn2	.	synonymous SNV	Fbn2:NM_010181:exon54:c.A6780C:p.R2260R	18qD3
chr18	58035935	58035935	A	G	exonic	Fbn2	.	synonymous SNV	Fbn2:NM_010181:exon54:c.T6771C:p.C2257C	18qD3
chr18	58036999	58036999	A	G	exonic	Fbn2	.	synonymous SNV	Fbn2:NM_010181:exon53:c.T6699C:p.N2233N	18qD3
chr18	58037038	58037038	C	T	exonic	Fbn2	.	synonymous SNV	Fbn2:NM_010181:exon53:c.G6660A:p.T2220T	18qD3
chr18	58038222	58038222	A	G	exonic	Fbn2	.	synonymous SNV	Fbn2:NM_010181:exon51:c.T6468C:p.P2156P	18qD3
chr18	58038234	58038234	G	A	exonic	Fbn2	.	synonymous SNV	Fbn2:NM_010181:exon51:c.C6456T:p.H2152H	18qD3
chr18	58038249	58038249	T	C	exonic	Fbn2	.	synonymous SNV	Fbn2:NM_010181:exon51:c.A6441G:p.L2147L	18qD3
chr18	58044284	58044284	A	G	exonic	Fbn2	.	synonymous SNV	Fbn2:NM_010181:exon47:c.T5940C:p.N1980N	18qD3
chr18	58059387	58059387	G	A	exonic	Fbn2	.	synonymous SNV	Fbn2:NM_010181:exon35:c.C4521T:p.H1507H	18qD3
chr18	58063523	58063523	A	G	exonic	Fbn2	.	synonymous SNV	Fbn2:NM_010181:exon33:c.T4308C:p.D1436D	18qD3
chr18	58063554	58063554	C	T	exonic	Fbn2	.	nonsynonymous SNV	Fbn2:NM_010181:exon33:c.G4277A:p.R1426Q	18qD3
chr18	58069135	58069135	T	C	exonic	Fbn2	.	synonymous SNV	Fbn2:NM_010181:exon30:c.A3945G:p.T1315T	18qD3
chr18	58071869	58071869	G	A	exonic	Fbn2	.	synonymous SNV	Fbn2:NM_010181:exon27:c.C3501T:p.C1167C	18qD3
chr18	58084584	58084584	G	A	exonic	Fbn2	.	synonymous SNV	Fbn2:NM_010181:exon20:c.C2646T:p.I882I	18qD3
chr18	58095941	58095941	C	T	exonic	Fbn2	.	synonymous SNV	Fbn2:NM_010181:exon16:c.G2196A:p.E732E	18qD3
chr18	58104009	58104009	T	C	exonic	Fbn2	.	nonsynonymous SNV	Fbn2:NM_010181:exon14:c.A1921G:p.I641V	18qD3
chr18	58113320	58113320	A	G	exonic	Fbn2	.	synonymous SNV	Fbn2:NM_010181:exon11:c.T1509C:p.C503C	18qD3
chr18	58114502	58114502	G	T	exonic	Fbn2	.	nonsynonymous SNV	Fbn2:NM_010181:exon10:c.C1319A:p.T440N	18qD3
chr18	59011095	59011095	G	A	exonic	Adamts19	.	synonymous SNV	Adamts19:NM_175506:exon18:c.G2748A:p.P916P	18qD3
chr18	59032896	59032896	G	A	exonic	Adamts19	.	synonymous SNV	Adamts19:NM_175506:exon21:c.G3159A:p.V1053V	18qD3
chr18	59175871	59175871	A	G	exonic	Chsy3	.	synonymous SNV	Chsy3:NM_001081328:exon1:c.A195G:p.Q65Q	18qD3
chr18	59175999	59175999	T	C	exonic	Chsy3	.	nonsynonymous SNV	Chsy3:NM_001081328:exon1:c.T323C:p.L108P	18qD3
chr18	59176167	59176167	T	C	exonic	Chsy3	.	nonsynonymous SNV	Chsy3:NM_001081328:exon1:c.T491C:p.V164A	18qD3
chr18	59176363	59176363	A	G	exonic	Chsy3	.	synonymous SNV	Chsy3:NM_001081328:exon1:c.A687G:p.P229P	18qD3
chr18	60707868	60707868	T	C	exonic	Ndst1	.	synonymous SNV	Ndst1:NM_001348100:exon3:c.A741G:p.E247E,Ndst1:NM_001348101:exon3:c.A741G:p.E247E,Ndst1:NM_001348102:exon3:c.A741G:p.E247E,Ndst1:NM_001348103:exon3:c.A741G:p.E247E,Ndst1:NM_001348146:exon3:c.A741G:p.E247E,Ndst1:NM_008306:exon3:c.A741G:p.E247E	18qD3
chr18	60831540	60831540	A	G	exonic	Tcof1	.	synonymous SNV	Tcof1:NM_001198984:exon13:c.T2013C:p.S671S,Tcof1:NM_011552:exon13:c.T2013C:p.S671S	18qE1
chr18	60838766	60838766	T	C	exonic	Tcof1	.	synonymous SNV	Tcof1:NM_001198984:exon5:c.A468G:p.K156K,Tcof1:NM_011552:exon5:c.A468G:p.K156K	18qE1
chr18	60843300	60843300	G	A	exonic	Tcof1	.	nonsynonymous SNV	Tcof1:NM_001198984:exon3:c.C236T:p.S79L,Tcof1:NM_011552:exon3:c.C236T:p.S79L	18qE1
chr18	61284053	61284053	C	T	exonic	Pde6a	.	synonymous SNV	Pde6a:NM_146086:exon20:c.C2322T:p.V774V	18qE1
chr18	61382496	61382496	G	A	exonic	Ppargc1b	.	synonymous SNV	Ppargc1b:NM_001364996:exon2:c.C75T:p.D25D	18qE1
chr18	61505759	61505759	G	C	exonic	Arhgef37	.	nonsynonymous SNV	Arhgef37:NM_177828:exon8:c.C918G:p.H306Q	18qE1
chr18	61737597	61737597	G	A	exonic	Afap1l1	.	nonsynonymous SNV	Afap1l1:NM_178928:exon15:c.C1709T:p.P570L	18qE1
chr18	61741658	61741658	C	T	exonic	Afap1l1	.	nonsynonymous SNV	Afap1l1:NM_178928:exon12:c.G1451A:p.R484H	18qE1
chr18	61871639	61871639	G	A	exonic	Ablim3	.	synonymous SNV	Ablim3:NM_198649:exon2:c.C78T:p.C26C,Ablim3:NM_001164491:exon3:c.C78T:p.C26C,Ablim3:NM_001360868:exon3:c.C78T:p.C26C	18qE1
chr18	61968101	61968101	C	T	exonic	Sh3tc2	.	synonymous SNV	Sh3tc2:NM_172628:exon3:c.C264T:p.V88V	18qE1
chr18	61974567	61974567	C	T	exonic	Sh3tc2	.	synonymous SNV	Sh3tc2:NM_172628:exon6:c.C648T:p.C216C	18qE1
chr18	61974635	61974635	T	C	exonic	Sh3tc2	.	nonsynonymous SNV	Sh3tc2:NM_172628:exon6:c.T716C:p.V239A	18qE1
chr18	62011846	62011846	A	C	exonic	Sh3tc2	.	synonymous SNV	Sh3tc2:NM_172628:exon15:c.A3370C:p.R1124R	18qE1
chr18	62178826	62178826	G	A	exonic	Adrb2	.	synonymous SNV	Adrb2:NM_007420:exon1:c.C927T:p.I309I	18qE1
chr18	62180463	62180463	T	C	exonic	Gm9949	.	startloss	Gm9949:NM_001013754:exon1:c.T2C:p.M1?	18qE1
chr18	62183976	62183976	T	C	exonic	Gm9949	.	nonsynonymous SNV	Gm9949:NM_001013754:exon2:c.T197C:p.L66P	18qE1
chr18	62184060	62184060	T	C	exonic	Gm9949	.	nonsynonymous SNV	Gm9949:NM_001013754:exon2:c.T281C:p.L94P	18qE1
chr18	66859078	66859078	A	G	exonic	Mc4r	.	synonymous SNV	Mc4r:NM_016977:exon1:c.T963C:p.P321P	18qE1
chr18	66859495	66859495	G	A	exonic	Mc4r	.	synonymous SNV	Mc4r:NM_016977:exon1:c.C546T:p.V182V	18qE1
chr18	66859942	66859942	C	T	exonic	Mc4r	.	synonymous SNV	Mc4r:NM_016977:exon1:c.G99A:p.K33K	18qE1
chr18	67237538	67237538	A	G	exonic	Mppe1	.	synonymous SNV	Mppe1:NM_001357518:exon3:c.T87C:p.V29V,Mppe1:NM_172630:exon3:c.T87C:p.V29V	18qE1
chr18	67401317	67401317	G	A	exonic	Tubb6	.	synonymous SNV	Tubb6:NM_026473:exon4:c.G285A:p.T95T	18qE1
chr18	67401326	67401326	A	G	exonic	Tubb6	.	synonymous SNV	Tubb6:NM_026473:exon4:c.A294G:p.G98G	18qE1
chr18	67401611	67401611	A	G	exonic	Tubb6	.	synonymous SNV	Tubb6:NM_026473:exon4:c.A579G:p.V193V	18qE1
chr18	67401656	67401656	T	C	exonic	Tubb6	.	synonymous SNV	Tubb6:NM_026473:exon4:c.T624C:p.Y208Y	18qE1
chr18	67402232	67402232	T	C	exonic	Tubb6	.	synonymous SNV	Tubb6:NM_026473:exon4:c.T1200C:p.G400G	18qE1
chr18	67409500	67409500	G	A	exonic	Afg3l2	.	synonymous SNV	Afg3l2:NM_027130:exon15:c.C1875T:p.C625C	18qE1
chr18	67409530	67409530	G	A	exonic	Afg3l2	.	synonymous SNV	Afg3l2:NM_027130:exon15:c.C1845T:p.Y615Y	18qE1
chr18	67414123	67414123	A	G	exonic	Afg3l2	.	synonymous SNV	Afg3l2:NM_027130:exon14:c.T1731C:p.H577H	18qE1
chr18	67421008	67421008	C	T	exonic	Afg3l2	.	synonymous SNV	Afg3l2:NM_027130:exon12:c.G1527A:p.A509A	18qE1
chr18	67421011	67421011	C	T	exonic	Afg3l2	.	synonymous SNV	Afg3l2:NM_027130:exon12:c.G1524A:p.L508L	18qE1
chr18	67425988	67425988	C	T	exonic	Afg3l2	.	synonymous SNV	Afg3l2:NM_027130:exon9:c.G1062A:p.T354T	18qE1
chr18	67425994	67425994	C	T	exonic	Afg3l2	.	synonymous SNV	Afg3l2:NM_027130:exon9:c.G1056A:p.G352G	18qE1
chr18	67431671	67431671	A	G	exonic	Afg3l2	.	synonymous SNV	Afg3l2:NM_027130:exon7:c.T732C:p.Y244Y	18qE1
chr18	67442842	67442842	T	C	exonic	Afg3l2	.	synonymous SNV	Afg3l2:NM_027130:exon2:c.A123G:p.Q41Q	18qE1
chr18	67472992	67472992	T	C	exonic	Prelid3a	.	synonymous SNV	Prelid3a:NM_144867:exon2:c.T168C:p.S56S	18qE1
chr18	67519328	67519328	T	C	exonic	Spire1	.	synonymous SNV	Spire1:NM_176832:exon6:c.A468G:p.R156R,Spire1:NM_194355:exon8:c.A1113G:p.R371R	18qE1
chr18	67545711	67545711	C	A	exonic	Spire1	.	synonymous SNV	Spire1:NM_194355:exon4:c.G594T:p.S198S	18qE1
chr18	67552583	67552583	G	A	exonic	Spire1	.	synonymous SNV	Spire1:NM_194355:exon3:c.C555T:p.D185D	18qE1
chr18	67623146	67623146	C	T	exonic	Cep76	.	synonymous SNV	Cep76:NM_001081073:exon10:c.G1614A:p.E538E,Cep76:NM_001357523:exon10:c.G1080A:p.E360E	18qE1
chr18	67623212	67623212	C	T	exonic	Cep76	.	synonymous SNV	Cep76:NM_001081073:exon10:c.G1548A:p.A516A,Cep76:NM_001357523:exon10:c.G1014A:p.A338A	18qE1
chr18	67788734	67788734	C	T	exonic	Seh1l	.	synonymous SNV	Seh1l:NM_001039088:exon6:c.C663T:p.P221P,Seh1l:NM_001360934:exon6:c.C663T:p.P221P,Seh1l:NM_028112:exon6:c.C663T:p.P221P	18qE1
chr18	67815984	67815984	C	G	exonic	Cep192	.	nonsynonymous SNV	Cep192:NM_027556:exon9:c.C875G:p.P292R	18qE1
chr18	67818806	67818806	T	C	exonic	Cep192	.	nonsynonymous SNV	Cep192:NM_027556:exon11:c.T1051C:p.C351R	18qE1
chr18	67829857	67829857	T	C	exonic	Cep192	.	nonsynonymous SNV	Cep192:NM_027556:exon16:c.T1943C:p.V648A	18qE1
chr18	67834507	67834507	T	C	exonic	Cep192	.	synonymous SNV	Cep192:NM_027556:exon17:c.T2061C:p.C687C	18qE1
chr18	67834944	67834944	C	T	exonic	Cep192	.	nonsynonymous SNV	Cep192:NM_027556:exon17:c.C2498T:p.T833I	18qE1
chr18	67837957	67837957	C	A	exonic	Cep192	.	nonsynonymous SNV	Cep192:NM_027556:exon19:c.C3028A:p.P1010T	18qE1
chr18	67841806	67841806	A	G	exonic	Cep192	.	nonsynonymous SNV	Cep192:NM_027556:exon20:c.A3979G:p.M1327V	18qE1
chr18	67850459	67850459	T	C	exonic	Cep192	.	nonsynonymous SNV	Cep192:NM_027556:exon24:c.T4589C:p.V1530A	18qE1
chr18	67854207	67854207	C	T	exonic	Cep192	.	synonymous SNV	Cep192:NM_027556:exon29:c.C5253T:p.G1751G	18qE1
chr18	67854208	67854208	A	G	exonic	Cep192	.	nonsynonymous SNV	Cep192:NM_027556:exon29:c.A5254G:p.I1752V	18qE1
chr18	67856213	67856213	G	A	exonic	Cep192	.	synonymous SNV	Cep192:NM_027556:exon31:c.G5430A:p.G1810G	18qE1
chr18	67858098	67858098	A	C	exonic	Cep192	.	nonsynonymous SNV	Cep192:NM_027556:exon32:c.A5650C:p.S1884R	18qE1
chr18	67862501	67862501	A	G	exonic	Cep192	.	nonsynonymous SNV	Cep192:NM_027556:exon35:c.A6121G:p.T2041A	18qE1
chr18	67866479	67866479	T	C	exonic	Cep192	.	nonsynonymous SNV	Cep192:NM_027556:exon37:c.T6413C:p.I2138T	18qE1
chr18	67881325	67881325	C	T	exonic	Cep192	.	synonymous SNV	Cep192:NM_027556:exon45:c.C7389T:p.H2463H	18qE1
chr18	68106636	68106636	T	C	exonic	Ldlrad4	.	synonymous SNV	Ldlrad4:NM_172631:exon3:c.T126C:p.S42S	18qE2
chr18	68338933	68338933	T	A	exonic	Mc5r	.	nonsynonymous SNV	Mc5r:NM_013596:exon2:c.T221A:p.F74Y	18qE2
chr18	69636955	69636955	T	C	exonic	Tcf4	.	synonymous SNV	Tcf4:NM_001083967:exon10:c.T777C:p.H259H,Tcf4:NM_001361126:exon10:c.T777C:p.H259H,Tcf4:NM_001361127:exon10:c.T777C:p.H259H,Tcf4:NM_001361128:exon10:c.T777C:p.H259H,Tcf4:NM_001361129:exon10:c.T777C:p.H259H,Tcf4:NM_013685:exon10:c.T777C:p.H259H	18qE2
chr18	69651271	69651271	A	G	exonic	Tcf4	.	synonymous SNV	Tcf4:NM_001083967:exon12:c.A969G:p.L323L,Tcf4:NM_001361126:exon12:c.A969G:p.L323L,Tcf4:NM_001361127:exon12:c.A969G:p.L323L,Tcf4:NM_001361128:exon12:c.A969G:p.L323L,Tcf4:NM_001361129:exon12:c.A969G:p.L323L,Tcf4:NM_013685:exon12:c.A969G:p.L323L	18qE2
chr18	69678028	69678028	C	T	exonic	Tcf4	.	synonymous SNV	Tcf4:NM_001083967:exon17:c.C1545T:p.D515D,Tcf4:NM_001361126:exon17:c.C1545T:p.D515D,Tcf4:NM_001361127:exon17:c.C1545T:p.D515D,Tcf4:NM_001361128:exon17:c.C1542T:p.D514D,Tcf4:NM_001361129:exon17:c.C1542T:p.D514D,Tcf4:NM_013685:exon17:c.C1545T:p.D515D	18qE2
chr18	70467412	70467412	G	A	exonic	4930503L19Rik	.	synonymous SNV	4930503L19Rik:NM_001379430:exon5:c.C1071T:p.P357P,4930503L19Rik:NM_001379431:exon5:c.C1125T:p.P375P,4930503L19Rik:NM_001379432:exon5:c.C1125T:p.P375P,4930503L19Rik:NM_172967:exon5:c.C1125T:p.P375P	18qE2
chr18	70468249	70468249	T	C	exonic	4930503L19Rik	.	synonymous SNV	4930503L19Rik:NM_001379430:exon4:c.A507G:p.V169V,4930503L19Rik:NM_001379431:exon4:c.A561G:p.V187V,4930503L19Rik:NM_001379432:exon4:c.A561G:p.V187V,4930503L19Rik:NM_001379433:exon4:c.A561G:p.V187V,4930503L19Rik:NM_172967:exon4:c.A561G:p.V187V	18qE2
chr18	70469460	70469460	A	G	exonic	4930503L19Rik	.	nonsynonymous SNV	4930503L19Rik:NM_001379431:exon3:c.T281C:p.I94T,4930503L19Rik:NM_001379432:exon3:c.T281C:p.I94T,4930503L19Rik:NM_001379433:exon3:c.T281C:p.I94T,4930503L19Rik:NM_172967:exon3:c.T281C:p.I94T	18qE2
chr18	70469632	70469632	C	A	exonic	4930503L19Rik	.	nonsynonymous SNV	4930503L19Rik:NM_001379430:exon3:c.G109T:p.A37S,4930503L19Rik:NM_001379431:exon3:c.G109T:p.A37S,4930503L19Rik:NM_001379432:exon3:c.G109T:p.A37S,4930503L19Rik:NM_001379433:exon3:c.G109T:p.A37S,4930503L19Rik:NM_172967:exon3:c.G109T:p.A37S	18qE2
chr18	70469653	70469653	G	T	exonic	4930503L19Rik	.	nonsynonymous SNV	4930503L19Rik:NM_001379430:exon3:c.C88A:p.R30S,4930503L19Rik:NM_001379431:exon3:c.C88A:p.R30S,4930503L19Rik:NM_001379432:exon3:c.C88A:p.R30S,4930503L19Rik:NM_001379433:exon3:c.C88A:p.R30S,4930503L19Rik:NM_172967:exon3:c.C88A:p.R30S	18qE2
chr18	70469703	70469703	T	C	exonic	4930503L19Rik	.	nonsynonymous SNV	4930503L19Rik:NM_001379430:exon3:c.A38G:p.Q13R,4930503L19Rik:NM_001379431:exon3:c.A38G:p.Q13R,4930503L19Rik:NM_001379432:exon3:c.A38G:p.Q13R,4930503L19Rik:NM_001379433:exon3:c.A38G:p.Q13R,4930503L19Rik:NM_172967:exon3:c.A38G:p.Q13R	18qE2
chr18	70476179	70476179	C	G	exonic	Stard6	.	nonsynonymous SNV	Stard6:NM_001289648:exon4:c.C76G:p.L26V,Stard6:NM_001289649:exon4:c.C76G:p.L26V,Stard6:NM_001289650:exon4:c.C76G:p.L26V,Stard6:NM_029019:exon4:c.C76G:p.L26V	18qE2
chr18	70509321	70509321	C	T	exonic	Poli	.	nonsynonymous SNV	Poli:NM_001136090:exon10:c.G1618A:p.G540R,Poli:NM_001289515:exon10:c.G1243A:p.G415R,Poli:NM_001289516:exon10:c.G1549A:p.G517R,Poli:NM_011972:exon10:c.G1807A:p.G603R	18qE2
chr18	70526567	70526567	A	G	exonic	Poli	.	synonymous SNV	Poli:NM_001136090:exon3:c.T192C:p.Y64Y,Poli:NM_001289516:exon3:c.T192C:p.Y64Y,Poli:NM_011972:exon3:c.T381C:p.Y127Y	18qE2
chr18	70530217	70530217	A	G	exonic	Poli	.	nonsynonymous SNV	Poli:NM_011972:exon1:c.T71C:p.L24S	18qE2
chr18	71299395	71299395	T	C	exonic	Dcc	.	synonymous SNV	Dcc:NM_007831:exon27:c.A4047G:p.L1349L	18qE2
chr18	71335959	71335959	A	G	exonic	Dcc	.	synonymous SNV	Dcc:NM_007831:exon23:c.T3372C:p.R1124R	18qE2
chr18	71336010	71336010	A	G	exonic	Dcc	.	synonymous SNV	Dcc:NM_007831:exon23:c.T3321C:p.G1107G	18qE2
chr18	71336073	71336073	C	T	exonic	Dcc	.	synonymous SNV	Dcc:NM_007831:exon23:c.G3258A:p.P1086P	18qE2
chr18	71367219	71367219	A	G	exonic	Dcc	.	synonymous SNV	Dcc:NM_007831:exon20:c.T2956C:p.L986L	18qE2
chr18	71420274	71420274	T	C	exonic	Dcc	.	synonymous SNV	Dcc:NM_007831:exon15:c.A2310G:p.E770E	18qE2
chr18	84015497	84015497	G	C	exonic	Tshz1	.	nonsynonymous SNV	Tshz1:NM_001081300:exon2:c.C785G:p.T262R	18qE4
chr18	84965522	84965522	G	A	exonic	Fbxo15	.	nonsynonymous SNV	Fbxo15:NM_001367965:exon8:c.G1096A:p.D366N,Fbxo15:NM_015798:exon8:c.G859A:p.D287N	18qE4
chr18	90592215	90592215	A	G	exonic	Gm45871	.	nonsynonymous SNV	Gm45871:NM_001362365:exon4:c.A1576G:p.I526V	18qE4
chr18	90592218	90592218	G	A	exonic	Gm45871	.	nonsynonymous SNV	Gm45871:NM_001362365:exon4:c.G1579A:p.E527K	18qE4
chr18	90592219	90592219	A	G	exonic	Gm45871	.	nonsynonymous SNV	Gm45871:NM_001362365:exon4:c.A1580G:p.E527G	18qE4
chr18	90592255	90592255	A	T	exonic	Gm45871	.	nonsynonymous SNV	Gm45871:NM_001362365:exon4:c.A1616T:p.E539V	18qE4
chr18	90592256	90592256	A	G	exonic	Gm45871	.	synonymous SNV	Gm45871:NM_001362365:exon4:c.A1617G:p.E539E	18qE4
chr19	4618048	4618048	C	G	exonic	Pcx	.	nonsynonymous SNV	Pcx:NM_008797:exon12:c.C1597G:p.P533A,Pcx:NM_001162946:exon13:c.C1600G:p.P534A	19qA
chr19	6098070	6098070	A	C	exonic	Gm550	.	nonsynonymous SNV	Gm550:NM_001362427:exon6:c.A541C:p.S181R	19qA
chr19	6848351	6848351	G	C	exonic	Ccdc88b	.	nonsynonymous SNV	Ccdc88b:NM_001081291:exon21:c.C3533G:p.A1178G	19qA
chr19	12934781	12934781	C	T	exonic	Olfr1449	.	synonymous SNV	Olfr1449:NM_146303:exon1:c.C42T:p.I14I	19qA
chr19	18977810	18977810	C	G	exonic	Rorb	.	nonsynonymous SNV	Rorb:NM_001043354:exon4:c.G408C:p.E136D,Rorb:NM_146095:exon4:c.G441C:p.E147D,Rorb:NM_001289921:exon5:c.G186C:p.E62D	19qB
chr19	20722359	20722359	C	G	exonic	Aldh1a7	.	nonsynonymous SNV	Aldh1a7:NM_011921:exon3:c.G231C:p.W77C	19qB
chr19	21598274	21598274	T	C	exonic	1110059E24Rik	.	synonymous SNV	1110059E24Rik:NM_025423:exon4:c.A384G:p.R128R	19qB
chr19	23218407	23218407	T	A	exonic	Smc5	.	nonsynonymous SNV	Smc5:NM_001252684:exon18:c.A2521T:p.T841S,Smc5:NM_001252685:exon18:c.A2293T:p.T765S,Smc5:NM_153808:exon18:c.A2521T:p.T841S	19qB
chr19	41526068	41526068	T	G	exonic	Morf4l1b	.	synonymous SNV	Morf4l1b:NM_001326287:exon1:c.T729G:p.A243A	19qC3
chr19	41526078	41526078	A	G	exonic	Morf4l1b	.	nonsynonymous SNV	Morf4l1b:NM_001326287:exon1:c.A739G:p.T247A	19qC3
chr19	41877835	41877835	C	G	exonic	Rrp12	.	nonsynonymous SNV	Rrp12:NM_199447:exon17:c.G1978C:p.V660L	19qC3
chr19	59035093	59035093	G	C	exonic	Shtn1	.	nonsynonymous SNV	Shtn1:NM_001114312:exon6:c.C485G:p.A162G,Shtn1:NM_175172:exon6:c.C485G:p.A162G	19qD3
chr1_GL456212_random	136547	136547	G	T	exonic	LOC102638047	.	nonsynonymous SNV	LOC102638047:NM_001378739:exon7:c.C955A:p.Q319K,LOC102638047:NM_001378740:exon7:c.C952A:p.Q318K	.
chr1_GL456212_random	136552	136552	T	C	exonic	LOC102638047	.	nonsynonymous SNV	LOC102638047:NM_001378739:exon7:c.A950G:p.H317R,LOC102638047:NM_001378740:exon7:c.A947G:p.H316R	.
chr1_GL456212_random	137879	137879	T	A	exonic	LOC102638047	.	stopgain	LOC102638047:NM_001378739:exon6:c.A781T:p.R261X,LOC102638047:NM_001378740:exon6:c.A781T:p.R261X	.
chr1_GL456212_random	143026	143026	G	A	exonic	LOC102638047	.	nonsynonymous SNV	LOC102638047:NM_001378739:exon3:c.C539T:p.A180V,LOC102638047:NM_001378740:exon3:c.C539T:p.A180V	.
chr1_GL456212_random	143027	143027	C	T	exonic	LOC102638047	.	nonsynonymous SNV	LOC102638047:NM_001378739:exon3:c.G538A:p.A180T,LOC102638047:NM_001378740:exon3:c.G538A:p.A180T	.
chr1_GL456212_random	145938	145938	C	G	exonic	LOC102638047	.	nonsynonymous SNV	LOC102638047:NM_001378739:exon2:c.G222C:p.Q74H,LOC102638047:NM_001378740:exon2:c.G222C:p.Q74H	.
chr1_GL456212_random	145951	145951	C	G	exonic	LOC102638047	.	nonsynonymous SNV	LOC102638047:NM_001378739:exon2:c.G209C:p.S70T,LOC102638047:NM_001378740:exon2:c.G209C:p.S70T	.
chr2	29147807	29147807	C	G	exonic	Setx	.	nonsynonymous SNV	Setx:NM_198033:exon10:c.C4303G:p.P1435A	2qB
chr2	33455094	33455094	G	C	exonic	Zbtb43	.	nonsynonymous SNV	Zbtb43:NM_001025594:exon3:c.C7G:p.P3A,Zbtb43:NM_001355611:exon3:c.C7G:p.P3A,Zbtb43:NM_001355612:exon3:c.C7G:p.P3A,Zbtb43:NM_001355610:exon4:c.C118G:p.P40A,Zbtb43:NM_027947:exon4:c.C118G:p.P40A	2qB
chr2	37357221	37357221	C	G	exonic	Pdcl	.	nonsynonymous SNV	Pdcl:NM_026176:exon2:c.G155C:p.G52A	2qB
chr2	69873905	69873905	C	G	exonic	Mettl5	.	nonsynonymous SNV	Mettl5:NM_029280:exon5:c.G520C:p.V174L	2qC2
chr2	75978016	75978016	G	A	exonic	Ttc30a2	.	synonymous SNV	Ttc30a2:NM_001081228:exon1:c.C151T:p.L51L	2qC3
chr2	75978017	75978017	C	T	exonic	Ttc30a2	.	synonymous SNV	Ttc30a2:NM_001081228:exon1:c.G150A:p.L50L	2qC3
chr2	75981447	75981447	T	C	exonic	Ttc30a1	.	synonymous SNV	Ttc30a1:NM_030188:exon1:c.A291G:p.E97E	2qC3
chr2	76158301	76158301	C	T	exonic	Pde11a	.	nonsynonymous SNV	Pde11a:NM_001081033:exon6:c.G1495A:p.A499T	2qC3
chr2	76215363	76215363	A	G	exonic	Pde11a	.	synonymous SNV	Pde11a:NM_001081033:exon3:c.T1116C:p.N372N	2qC3
chr2	76215399	76215399	T	C	exonic	Pde11a	.	synonymous SNV	Pde11a:NM_001081033:exon3:c.A1080G:p.Q360Q	2qC3
chr2	76379010	76379010	A	T	exonic	Rbm45	.	synonymous SNV	Rbm45:NM_153405:exon8:c.A1167T:p.P389P	2qC3
chr2	76380500	76380500	G	A	exonic	Rbm45	.	synonymous SNV	Rbm45:NM_153405:exon9:c.G1374A:p.K458K	2qC3
chr2	79342427	79342427	A	G	exonic	Cerkl	.	nonsynonymous SNV	Cerkl:NM_001048176:exon7:c.T901C:p.C301R	2qC3
chr2	79657590	79657590	C	A	exonic	Itprid2	.	synonymous SNV	Itprid2:NM_080558:exon11:c.C2016A:p.G672G	2qC3
chr2	79660295	79660295	C	T	exonic	Itprid2	.	synonymous SNV	Itprid2:NM_080558:exon12:c.C2838T:p.V946V	2qC3
chr2	79661704	79661704	C	G	exonic	Itprid2	.	synonymous SNV	Itprid2:NM_080558:exon15:c.C3198G:p.P1066P	2qC3
chr2	79662437	79662437	A	G	exonic	Itprid2	.	synonymous SNV	Itprid2:NM_080558:exon16:c.A3327G:p.S1109S	2qC3
chr2	79662650	79662650	A	G	exonic	Itprid2	.	synonymous SNV	Itprid2:NM_080558:exon16:c.A3540G:p.V1180V	2qC3
chr2	80331307	80331307	C	G	exonic	Dnajc10	.	synonymous SNV	Dnajc10:NM_024181:exon10:c.C888G:p.A296A	2qC3
chr2	80413368	80413368	G	T	exonic	Frzb	.	synonymous SNV	Frzb:NM_011356:exon6:c.C966A:p.R322R	2qC3
chr2	80413372	80413372	G	A	exonic	Frzb	.	nonsynonymous SNV	Frzb:NM_011356:exon6:c.C962T:p.A321V	2qC3
chr2	80418374	80418374	A	G	exonic	Frzb	.	synonymous SNV	Frzb:NM_011356:exon4:c.T735C:p.C245C	2qC3
chr2	82256848	82256848	G	A	exonic	Zfp804a	.	synonymous SNV	Zfp804a:NM_175513:exon4:c.G1020A:p.V340V	2qD
chr2	83662265	83662265	C	T	exonic	Zc3h15	.	synonymous SNV	Zc3h15:NM_026934:exon9:c.C1083T:p.D361D	2qD
chr2	83792010	83792010	T	C	exonic	Itgav	.	synonymous SNV	Itgav:NM_008402:exon20:c.T2043C:p.A681A	2qD
chr2	83794245	83794245	T	C	exonic	Itgav	.	synonymous SNV	Itgav:NM_008402:exon22:c.T2178C:p.G726G	2qD
chr2	83794928	83794928	T	C	exonic	Itgav	.	synonymous SNV	Itgav:NM_008402:exon23:c.T2256C:p.S752S	2qD
chr2	83794943	83794943	T	C	exonic	Itgav	.	synonymous SNV	Itgav:NM_008402:exon23:c.T2271C:p.S757S	2qD
chr2	83801836	83801836	G	T	exonic	Itgav	.	nonsynonymous SNV	Itgav:NM_008402:exon27:c.G2761T:p.A921S	2qD
chr2	83879197	83879197	T	C	exonic	Fam171b	.	synonymous SNV	Fam171b:NM_175514:exon8:c.T1212C:p.H404H	2qD
chr2	83879665	83879665	G	A	exonic	Fam171b	.	synonymous SNV	Fam171b:NM_175514:exon8:c.G1680A:p.K560K	2qD
chr2	83879971	83879971	G	A	exonic	Fam171b	.	synonymous SNV	Fam171b:NM_175514:exon8:c.G1986A:p.P662P	2qD
chr2	83880283	83880283	C	T	exonic	Fam171b	.	synonymous SNV	Fam171b:NM_175514:exon8:c.C2298T:p.I766I	2qD
chr2	83880419	83880419	C	A	exonic	Fam171b	.	synonymous SNV	Fam171b:NM_175514:exon8:c.C2434A:p.R812R	2qD
chr2	83880427	83880427	A	G	exonic	Fam171b	.	synonymous SNV	Fam171b:NM_175514:exon8:c.A2442G:p.E814E	2qD
chr2	83915232	83915232	C	T	exonic	Zswim2	.	nonsynonymous SNV	Zswim2:NM_027964:exon9:c.G1861A:p.A621T	2qD
chr2	83915237	83915237	T	C	exonic	Zswim2	.	nonsynonymous SNV	Zswim2:NM_027964:exon9:c.A1856G:p.N619S	2qD
chr2	84453969	84453969	T	C	exonic	Tfpi	.	synonymous SNV	Tfpi:NM_001177319:exon4:c.A138G:p.L46L,Tfpi:NM_001177320:exon4:c.A138G:p.L46L,Tfpi:NM_001355271:exon4:c.A138G:p.L46L,Tfpi:NM_001355273:exon4:c.A138G:p.L46L,Tfpi:NM_011576:exon4:c.A138G:p.L46L	2qD
chr2	84723669	84723669	T	A	exonic	Clp1	.	synonymous SNV	Clp1:NM_133840:exon3:c.A1155T:p.G385G	2qD
chr2	84723924	84723924	A	T	exonic	Clp1	.	synonymous SNV	Clp1:NM_133840:exon3:c.T900A:p.R300R	2qD
chr2	84770126	84770126	A	G	exonic	Serping1	.	nonsynonymous SNV	Serping1:NM_009776:exon5:c.T871C:p.C291R	2qD
chr2	84802836	84802836	G	T	exonic	Ube2l6	.	nonsynonymous SNV	Ube2l6:NM_019949:exon2:c.G85T:p.D29Y	2qD
chr2	84815664	84815664	G	A	exonic	Smtnl1	.	synonymous SNV	Smtnl1:NM_024230:exon6:c.C1026T:p.I342I	2qD
chr2	84818820	84818820	A	G	exonic	Smtnl1	.	nonsynonymous SNV	Smtnl1:NM_024230:exon2:c.T89C:p.I30T	2qD
chr2	84829811	84829811	G	C	exonic	Timm10	.	synonymous SNV	Timm10:NM_013899:exon3:c.G93C:p.R31R	2qD
chr2	84829923	84829923	T	C	exonic	Timm10	.	synonymous SNV	Timm10:NM_013899:exon3:c.T205C:p.L69L	2qD
chr2	85058381	85058381	C	G	exonic	Tnks1bp1	.	nonsynonymous SNV	Tnks1bp1:NM_001081260:exon5:c.C1051G:p.P351A	2qD
chr2	85062551	85062551	A	G	exonic	Tnks1bp1	.	nonsynonymous SNV	Tnks1bp1:NM_001081260:exon6:c.A2821G:p.N941D	2qD
chr2	85063513	85063513	C	T	exonic	Tnks1bp1	.	synonymous SNV	Tnks1bp1:NM_001081260:exon6:c.C3783T:p.F1261F	2qD
chr2	85070186	85070186	A	C	exonic	Tnks1bp1	.	synonymous SNV	Tnks1bp1:NM_001081260:exon7:c.A4485C:p.P1495P	2qD
chr2	85137646	85137646	T	C	exonic	Aplnr	.	synonymous SNV	Aplnr:NM_011784:exon1:c.T1014C:p.A338A	2qD
chr2	85579944	85579944	G	A	exonic	Olfr996	.	nonsynonymous SNV	Olfr996:NM_146437:exon1:c.G704A:p.R235Q	2qD
chr2	85591277	85591277	T	G	exonic	Olfr998	.	nonsynonymous SNV	Olfr998:NM_146436:exon1:c.T736G:p.S246A	2qD
chr2	85608164	85608164	C	A	exonic	Olfr1000	.	nonsynonymous SNV	Olfr1000:NM_001011695:exon1:c.G745T:p.A249S	2qD
chr2	85647656	85647656	C	T	exonic	Olfr1002	.	nonsynonymous SNV	Olfr1002:NM_146573:exon1:c.G664A:p.A222T	2qD
chr2	85663494	85663494	A	C	exonic	Olfr154	.	nonsynonymous SNV	Olfr154:NM_013728:exon1:c.T939G:p.F313L	2qD
chr2	85663848	85663848	T	A	exonic	Olfr154	.	nonsynonymous SNV	Olfr154:NM_013728:exon1:c.A585T:p.K195N	2qD
chr2	85663973	85663973	C	T	exonic	Olfr154	.	nonsynonymous SNV	Olfr154:NM_013728:exon1:c.G460A:p.V154I	2qD
chr2	85674996	85674996	C	T	exonic	Olfr1006	.	nonsynonymous SNV	Olfr1006:NM_146570:exon2:c.G154A:p.D52N	2qD
chr2	85689867	85689867	A	G	exonic	Olfr1008	.	nonsynonymous SNV	Olfr1008:NM_146866:exon1:c.A437G:p.D146G	2qD
chr2	85690080	85690080	T	C	exonic	Olfr1008	.	nonsynonymous SNV	Olfr1008:NM_146866:exon1:c.T650C:p.L217S	2qD
chr2	85690147	85690147	T	A	exonic	Olfr1008	.	synonymous SNV	Olfr1008:NM_146866:exon1:c.T717A:p.S239S	2qD
chr2	85721568	85721568	C	T	exonic	Olfr1009	.	synonymous SNV	Olfr1009:NM_146572:exon1:c.C162T:p.R54R	2qD
chr2	85721655	85721655	A	G	exonic	Olfr1009	.	synonymous SNV	Olfr1009:NM_146572:exon1:c.A249G:p.T83T	2qD
chr2	85722231	85722231	T	C	exonic	Olfr1009	.	synonymous SNV	Olfr1009:NM_146572:exon1:c.T825C:p.S275S	2qD
chr2	85753473	85753473	T	C	exonic	Olfr1010	.	synonymous SNV	Olfr1010:NM_207149:exon2:c.T111C:p.I37I	2qD
chr2	85753566	85753566	C	T	exonic	Olfr1010	.	synonymous SNV	Olfr1010:NM_207149:exon2:c.C204T:p.F68F	2qD
chr2	85753697	85753697	T	C	exonic	Olfr1010	.	synonymous SNV	Olfr1010:NM_207149:exon3:c.T327C:p.Y109Y	2qD
chr2	85753768	85753768	C	T	exonic	Olfr1010	.	nonsynonymous SNV	Olfr1010:NM_207149:exon3:c.C398T:p.S133F	2qD
chr2	85754045	85754045	T	C	exonic	Olfr1010	.	synonymous SNV	Olfr1010:NM_207149:exon3:c.T675C:p.I225I	2qD
chr2	85759619	85759619	G	A	exonic	Olfr1012	.	synonymous SNV	Olfr1012:NM_146568:exon1:c.C756T:p.G252G	2qD
chr2	85777144	85777144	T	G	exonic	Olfr1014	.	nonsynonymous SNV	Olfr1014:NM_146569:exon1:c.T559G:p.S187A	2qD
chr2	85777188	85777188	T	C	exonic	Olfr1014	.	synonymous SNV	Olfr1014:NM_146569:exon1:c.T603C:p.L201L	2qD
chr2	85777189	85777189	T	C	exonic	Olfr1014	.	synonymous SNV	Olfr1014:NM_146569:exon1:c.T604C:p.L202L	2qD
chr2	85777363	85777363	C	T	exonic	Olfr1014	.	nonsynonymous SNV	Olfr1014:NM_146569:exon1:c.C778T:p.R260W	2qD
chr2	85785545	85785545	G	A	exonic	Olfr1015	.	synonymous SNV	Olfr1015:NM_146571:exon1:c.G33A:p.E11E	2qD
chr2	85785881	85785881	C	T	exonic	Olfr1015	.	synonymous SNV	Olfr1015:NM_146571:exon1:c.C369T:p.H123H	2qD
chr2	85785942	85785942	T	C	exonic	Olfr1015	.	synonymous SNV	Olfr1015:NM_146571:exon1:c.T430C:p.L144L	2qD
chr2	85786271	85786271	T	C	exonic	Olfr1015	.	synonymous SNV	Olfr1015:NM_146571:exon1:c.T759C:p.G253G	2qD
chr2	85786348	85786348	C	T	exonic	Olfr1015	.	nonsynonymous SNV	Olfr1015:NM_146571:exon1:c.C836T:p.T279I	2qD
chr2	85800257	85800257	T	G	exonic	Olfr1016	.	synonymous SNV	Olfr1016:NM_001011758:exon1:c.A12C:p.G4G	2qD
chr2	85823110	85823110	T	C	exonic	Olfr1018	.	synonymous SNV	Olfr1018:NM_146586:exon1:c.T138C:p.I46I	2qD
chr2	85823164	85823164	T	C	exonic	Olfr1018	.	synonymous SNV	Olfr1018:NM_146586:exon1:c.T192C:p.L64L	2qD
chr2	85823259	85823259	C	T	exonic	Olfr1018	.	nonsynonymous SNV	Olfr1018:NM_146586:exon1:c.C287T:p.A96V	2qD
chr2	85823399	85823399	A	G	exonic	Olfr1018	.	nonsynonymous SNV	Olfr1018:NM_146586:exon1:c.A427G:p.I143V	2qD
chr2	85823677	85823677	A	G	exonic	Olfr1018	.	synonymous SNV	Olfr1018:NM_146586:exon1:c.A705G:p.R235R	2qD
chr2	85823689	85823689	C	G	exonic	Olfr1018	.	synonymous SNV	Olfr1018:NM_146586:exon1:c.C717G:p.L239L	2qD
chr2	85823728	85823728	C	T	exonic	Olfr1018	.	synonymous SNV	Olfr1018:NM_146586:exon1:c.C756T:p.F252F	2qD
chr2	85868958	85868958	A	G	exonic	Olfr1022	.	nonsynonymous SNV	Olfr1022:NM_146589:exon1:c.A365G:p.H122R	2qD
chr2	85886837	85886837	T	C	exonic	Olfr1023	.	synonymous SNV	Olfr1023:NM_146587:exon1:c.T36C:p.F12F	2qD
chr2	85886844	85886844	G	A	exonic	Olfr1023	.	nonsynonymous SNV	Olfr1023:NM_146587:exon1:c.G43A:p.V15M	2qD
chr2	85887485	85887485	C	T	exonic	Olfr1023	.	synonymous SNV	Olfr1023:NM_146587:exon1:c.C684T:p.I228I	2qD
chr2	85887683	85887683	C	T	exonic	Olfr1023	.	synonymous SNV	Olfr1023:NM_146587:exon1:c.C882T:p.N294N	2qD
chr2	85904088	85904088	A	G	exonic	Olfr1024	.	nonsynonymous SNV	Olfr1024:NM_001005230:exon1:c.T965C:p.V322A	2qD
chr2	85904632	85904632	A	T	exonic	Olfr1024	.	nonsynonymous SNV	Olfr1024:NM_001005230:exon1:c.T421A:p.L141M	2qD
chr2	85904672	85904672	C	T	exonic	Olfr1024	.	synonymous SNV	Olfr1024:NM_001005230:exon1:c.G381A:p.R127R	2qD
chr2	85904750	85904750	C	T	exonic	Olfr1024	.	synonymous SNV	Olfr1024:NM_001005230:exon1:c.G303A:p.G101G	2qD
chr2	85904977	85904977	G	A	exonic	Olfr1024	.	nonsynonymous SNV	Olfr1024:NM_001005230:exon1:c.C76T:p.P26S	2qD
chr2	85923633	85923633	C	T	exonic	Olfr1026	.	nonsynonymous SNV	Olfr1026:NM_146584:exon1:c.C364T:p.R122C	2qD
chr2	85923923	85923923	T	C	exonic	Olfr1026	.	synonymous SNV	Olfr1026:NM_146584:exon1:c.T654C:p.Y218Y	2qD
chr2	85951970	85951970	G	A	exonic	Olfr1028	.	synonymous SNV	Olfr1028:NM_001011774:exon1:c.G906A:p.K302K	2qD
chr2	85975359	85975359	G	C	exonic	Olfr1029	.	nonsynonymous SNV	Olfr1029:NM_001011852:exon1:c.G115C:p.V39L	2qD
chr2	85975722	85975722	G	A	exonic	Olfr1029	.	nonsynonymous SNV	Olfr1029:NM_001011852:exon1:c.G478A:p.A160T	2qD
chr2	85984147	85984147	G	A	exonic	Olfr1030	.	synonymous SNV	Olfr1030:NM_146588:exon2:c.G306A:p.A102A	2qD
chr2	85984299	85984299	G	C	exonic	Olfr1030	.	nonsynonymous SNV	Olfr1030:NM_146588:exon2:c.G458C:p.G153A	2qD
chr2	86008579	86008579	C	A	exonic	Olfr1032	.	nonsynonymous SNV	Olfr1032:NM_146579:exon1:c.C802A:p.Q268K	2qD
chr2	86047066	86047066	T	C	exonic	Olfr1034	.	nonsynonymous SNV	Olfr1034:NM_001011872:exon1:c.T583C:p.Y195H	2qD
chr2	86047101	86047101	G	A	exonic	Olfr1034	.	synonymous SNV	Olfr1034:NM_001011872:exon1:c.G618A:p.T206T	2qD
chr2	86075105	86075105	G	A	exonic	Olfr1036	.	nonsynonymous SNV	Olfr1036:NM_207142:exon1:c.G364A:p.V122M	2qD
chr2	86122134	86122134	T	C	exonic	Olfr1038-ps	.	unknown	UNKNOWN	2qD
chr2	86122137	86122137	C	G	exonic	Olfr1038-ps	.	unknown	UNKNOWN	2qD
chr2	86122149	86122149	T	C	exonic	Olfr1038-ps	.	unknown	UNKNOWN	2qD
chr2	86131226	86131226	T	C	exonic	Olfr1039	.	nonsynonymous SNV	Olfr1039:NM_001011784:exon1:c.A436G:p.T146A	2qD
chr2	86131234	86131234	T	C	exonic	Olfr1039	.	nonsynonymous SNV	Olfr1039:NM_001011784:exon1:c.A428G:p.Q143R	2qD
chr2	86159933	86159933	T	C	exonic	Olfr1042	.	nonsynonymous SNV	Olfr1042:NM_001011777:exon1:c.A436G:p.T146A	2qD
chr2	86162435	86162435	G	C	exonic	Olfr1043	.	synonymous SNV	Olfr1043:NM_146577:exon1:c.C513G:p.S171S	2qD
chr2	86197989	86197989	C	T	exonic	Olfr1045	.	synonymous SNV	Olfr1045:NM_147017:exon1:c.G762A:p.T254T	2qD
chr2	86198018	86198018	C	T	exonic	Olfr1045	.	nonsynonymous SNV	Olfr1045:NM_147017:exon1:c.G733A:p.V245M	2qD
chr2	86198286	86198286	T	A	exonic	Olfr1045	.	synonymous SNV	Olfr1045:NM_147017:exon1:c.A465T:p.T155T	2qD
chr2	86198313	86198313	C	G	exonic	Olfr1045	.	synonymous SNV	Olfr1045:NM_147017:exon1:c.G438C:p.S146S	2qD
chr2	86216932	86216932	C	G	exonic	Olfr1046	.	synonymous SNV	Olfr1046:NM_146582:exon1:c.G777C:p.L259L	2qD
chr2	86216955	86216955	C	T	exonic	Olfr1046	.	nonsynonymous SNV	Olfr1046:NM_146582:exon1:c.G754A:p.V252I	2qD
chr2	86217551	86217551	T	C	exonic	Olfr1046	.	nonsynonymous SNV	Olfr1046:NM_146582:exon1:c.A158G:p.H53R	2qD
chr2	86217556	86217556	C	A	exonic	Olfr1046	.	synonymous SNV	Olfr1046:NM_146582:exon1:c.G153T:p.L51L	2qD
chr2	86217583	86217583	C	T	exonic	Olfr1046	.	synonymous SNV	Olfr1046:NM_146582:exon1:c.G126A:p.L42L	2qD
chr2	86255058	86255058	C	G	exonic	Olfr1049	.	nonsynonymous SNV	Olfr1049:NM_147016:exon1:c.G634C:p.V212L	2qD
chr2	86298279	86298279	T	A	exonic	Olfr1052	.	synonymous SNV	Olfr1052:NM_147010:exon1:c.T462A:p.I154I	2qD
chr2	86298475	86298475	C	T	exonic	Olfr1052	.	nonsynonymous SNV	Olfr1052:NM_147010:exon1:c.C658T:p.L220F	2qD
chr2	86355798	86355798	T	C	exonic	Olfr1056	.	nonsynonymous SNV	Olfr1056:NM_147018:exon1:c.A583G:p.I195V	2qD
chr2	86374967	86374967	A	T	exonic	Olfr1057	.	synonymous SNV	Olfr1057:NM_207563:exon1:c.T444A:p.T148T	2qD
chr2	86385632	86385632	G	C	exonic	Olfr1058	.	nonsynonymous SNV	Olfr1058:NM_146391:exon1:c.C785G:p.P262R	2qD
chr2	86386120	86386120	G	A	exonic	Olfr1058	.	synonymous SNV	Olfr1058:NM_146391:exon1:c.C297T:p.I99I	2qD
chr2	86386327	86386327	A	C	exonic	Olfr1058	.	synonymous SNV	Olfr1058:NM_146391:exon1:c.T90G:p.L30L	2qD
chr2	86386330	86386330	T	A	exonic	Olfr1058	.	synonymous SNV	Olfr1058:NM_146391:exon1:c.A87T:p.V29V	2qD
chr2	86386405	86386405	A	G	exonic	Olfr1058	.	synonymous SNV	Olfr1058:NM_146391:exon1:c.T12C:p.H4H	2qD
chr2	86413738	86413738	C	T	exonic	Olfr1061	.	nonsynonymous SNV	Olfr1061:NM_207134:exon1:c.G313A:p.G105S	2qD
chr2	86413776	86413776	A	G	exonic	Olfr1061	.	nonsynonymous SNV	Olfr1061:NM_207134:exon1:c.T275C:p.I92T	2qD
chr2	86413806	86413806	A	G	exonic	Olfr1061	.	nonsynonymous SNV	Olfr1061:NM_207134:exon1:c.T245C:p.L82S	2qD
chr2	86413839	86413839	A	T	exonic	Olfr1061	.	nonsynonymous SNV	Olfr1061:NM_207134:exon1:c.T212A:p.L71H	2qD
chr2	86413853	86413853	G	A	exonic	Olfr1061	.	synonymous SNV	Olfr1061:NM_207134:exon1:c.C198T:p.L66L	2qD
chr2	86413895	86413895	A	T	exonic	Olfr1061	.	nonsynonymous SNV	Olfr1061:NM_207134:exon1:c.T156A:p.D52E	2qD
chr2	86413901	86413901	T	C	exonic	Olfr1061	.	nonsynonymous SNV	Olfr1061:NM_207134:exon1:c.A150G:p.I50M	2qD
chr2	86413912	86413912	T	C	exonic	Olfr1061	.	nonsynonymous SNV	Olfr1061:NM_207134:exon1:c.A139G:p.I47V	2qD
chr2	86413913	86413913	T	G	exonic	Olfr1061	.	synonymous SNV	Olfr1061:NM_207134:exon1:c.A138C:p.I46I	2qD
chr2	86445390	86445390	G	C	exonic	Olfr1065	.	synonymous SNV	Olfr1065:NM_146408:exon1:c.C591G:p.V197V	2qD
chr2	86445624	86445624	G	A	exonic	Olfr1065	.	synonymous SNV	Olfr1065:NM_146408:exon1:c.C357T:p.S119S	2qD
chr2	86445771	86445771	G	A	exonic	Olfr1065	.	synonymous SNV	Olfr1065:NM_146408:exon1:c.C210T:p.D70D	2qD
chr2	86445792	86445792	A	G	exonic	Olfr1065	.	synonymous SNV	Olfr1065:NM_146408:exon1:c.T189C:p.L63L	2qD
chr2	86445933	86445933	G	A	exonic	Olfr1065	.	synonymous SNV	Olfr1065:NM_146408:exon1:c.C48T:p.G16G	2qD
chr2	86455377	86455377	G	T	exonic	Olfr1066	.	nonsynonymous SNV	Olfr1066:NM_001011735:exon1:c.C893A:p.T298K	2qD
chr2	86455643	86455643	C	T	exonic	Olfr1066	.	synonymous SNV	Olfr1066:NM_001011735:exon1:c.G627A:p.S209S	2qD
chr2	86455795	86455795	T	C	exonic	Olfr1066	.	nonsynonymous SNV	Olfr1066:NM_001011735:exon1:c.A475G:p.I159V	2qD
chr2	86456110	86456110	C	T	exonic	Olfr1066	.	nonsynonymous SNV	Olfr1066:NM_001011735:exon1:c.G160A:p.G54R	2qD
chr2	86456131	86456131	T	C	exonic	Olfr1066	.	nonsynonymous SNV	Olfr1066:NM_001011735:exon1:c.A139G:p.I47V	2qD
chr2	86483683	86483683	A	G	exonic	Olfr228	.	nonsynonymous SNV	Olfr228:NM_146405:exon1:c.T58C:p.C20R	2qD
chr2	86483699	86483699	A	C	exonic	Olfr228	.	synonymous SNV	Olfr228:NM_146405:exon1:c.T42G:p.L14L	2qD
chr2	86483702	86483702	A	G	exonic	Olfr228	.	synonymous SNV	Olfr228:NM_146405:exon1:c.T39C:p.I13I	2qD
chr2	86508824	86508824	T	C	exonic	Olfr1076	.	nonsynonymous SNV	Olfr1076:NM_146406:exon1:c.T364C:p.W122R	2qD
chr2	86508872	86508872	A	C	exonic	Olfr1076	.	nonsynonymous SNV	Olfr1076:NM_146406:exon1:c.A412C:p.K138Q	2qD
chr2	86553934	86553934	G	A	exonic	Olfr1080	.	synonymous SNV	Olfr1080:NM_146409:exon2:c.C189T:p.L63L	2qD
chr2	86553948	86553948	T	C	exonic	Olfr1080	.	nonsynonymous SNV	Olfr1080:NM_146409:exon2:c.A175G:p.M59V	2qD
chr2	86553977	86553977	G	T	exonic	Olfr1080	.	nonsynonymous SNV	Olfr1080:NM_146409:exon2:c.C146A:p.T49N	2qD
chr2	86554005	86554005	T	C	exonic	Olfr1080	.	nonsynonymous SNV	Olfr1080:NM_146409:exon2:c.A118G:p.I40V	2qD
chr2	86593998	86593998	G	A	exonic	Olfr1082	.	nonsynonymous SNV	Olfr1082:NM_207674:exon2:c.C829T:p.L277F	2qD
chr2	86594042	86594042	G	A	exonic	Olfr1082	.	nonsynonymous SNV	Olfr1082:NM_207674:exon2:c.C785T:p.P262L	2qD
chr2	86594049	86594049	C	T	exonic	Olfr1082	.	nonsynonymous SNV	Olfr1082:NM_207674:exon2:c.G778A:p.V260I	2qD
chr2	86594124	86594124	G	A	exonic	Olfr1082	.	nonsynonymous SNV	Olfr1082:NM_207674:exon2:c.C703T:p.R235C	2qD
chr2	86594264	86594264	A	G	exonic	Olfr1082	.	nonsynonymous SNV	Olfr1082:NM_207674:exon2:c.T563C:p.L188P	2qD
chr2	86594415	86594415	G	A	exonic	Olfr1082	.	nonsynonymous SNV	Olfr1082:NM_207674:exon2:c.C412T:p.H138Y	2qD
chr2	86594426	86594426	A	G	exonic	Olfr1082	.	nonsynonymous SNV	Olfr1082:NM_207674:exon2:c.T401C:p.V134A	2qD
chr2	86594481	86594481	A	C	exonic	Olfr1082	.	nonsynonymous SNV	Olfr1082:NM_207674:exon2:c.T346G:p.S116A	2qD
chr2	86594492	86594492	A	T	exonic	Olfr1082	.	nonsynonymous SNV	Olfr1082:NM_207674:exon2:c.T335A:p.L112H	2qD
chr2	86594494	86594494	C	G	exonic	Olfr1082	.	nonsynonymous SNV	Olfr1082:NM_207674:exon2:c.G333C:p.E111D	2qD
chr2	86638842	86638842	T	C	exonic	Olfr1084	.	nonsynonymous SNV	Olfr1084:NM_207135:exon1:c.A865G:p.I289V	2qD
chr2	86639043	86639043	G	A	exonic	Olfr1084	.	nonsynonymous SNV	Olfr1084:NM_207135:exon1:c.C664T:p.L222F	2qD
chr2	86639057	86639057	G	T	exonic	Olfr1084	.	nonsynonymous SNV	Olfr1084:NM_207135:exon1:c.C650A:p.S217Y	2qD
chr2	86639062	86639062	A	C	exonic	Olfr1084	.	synonymous SNV	Olfr1084:NM_207135:exon1:c.T645G:p.L215L	2qD
chr2	86658019	86658019	C	T	exonic	Olfr1085	.	synonymous SNV	Olfr1085:NM_146590:exon1:c.G438A:p.A146A	2qD
chr2	86732892	86732892	G	T	exonic	Olfr1089	.	nonsynonymous SNV	Olfr1089:NM_001011771:exon1:c.C719A:p.T240N	2qD
chr2	86732991	86732991	A	G	exonic	Olfr1089	.	nonsynonymous SNV	Olfr1089:NM_001011771:exon1:c.T620C:p.L207S	2qD
chr2	86733246	86733246	T	C	exonic	Olfr1089	.	nonsynonymous SNV	Olfr1089:NM_001011771:exon1:c.A365G:p.H122R	2qD
chr2	86785920	86785920	G	T	exonic	Olfr1093	.	synonymous SNV	Olfr1093:NM_001368206:exon2:c.G189T:p.G63G,Olfr1093:NM_146366:exon3:c.G189T:p.G63G	2qD
chr2	86829443	86829443	C	T	exonic	Olfr1094	.	synonymous SNV	Olfr1094:NM_146365:exon1:c.C690T:p.Y230Y	2qD
chr2	86850876	86850876	A	G	exonic	Olfr1095	.	nonsynonymous SNV	Olfr1095:NM_146730:exon1:c.T821C:p.I274T	2qD
chr2	86850878	86850878	T	A	exonic	Olfr1095	.	synonymous SNV	Olfr1095:NM_146730:exon1:c.A819T:p.S273S	2qD
chr2	86850884	86850884	G	T	exonic	Olfr1095	.	synonymous SNV	Olfr1095:NM_146730:exon1:c.C813A:p.I271I	2qD
chr2	86851243	86851243	A	C	exonic	Olfr1095	.	nonsynonymous SNV	Olfr1095:NM_146730:exon1:c.T454G:p.L152V	2qD
chr2	86851367	86851367	A	G	exonic	Olfr1095	.	synonymous SNV	Olfr1095:NM_146730:exon1:c.T330C:p.C110C	2qD
chr2	86851420	86851420	G	A	exonic	Olfr1095	.	nonsynonymous SNV	Olfr1095:NM_146730:exon1:c.C277T:p.H93Y	2qD
chr2	86872802	86872802	T	G	exonic	Olfr1096	.	nonsynonymous SNV	Olfr1096:NM_001370760:exon2:c.A920C:p.K307T	2qD
chr2	86890706	86890706	A	G	exonic	Olfr1097	.	synonymous SNV	Olfr1097:NM_146843:exon2:c.T468C:p.S156S	2qD
chr2	86891158	86891158	C	G	exonic	Olfr1097	.	nonsynonymous SNV	Olfr1097:NM_146843:exon2:c.G16C:p.D6H	2qD
chr2	86922588	86922588	T	C	exonic	Olfr1098	.	nonsynonymous SNV	Olfr1098:NM_146845:exon1:c.A943G:p.K315E	2qD
chr2	86922708	86922708	A	G	exonic	Olfr1098	.	nonsynonymous SNV	Olfr1098:NM_146845:exon1:c.T823C:p.S275P	2qD
chr2	86922712	86922712	T	A	exonic	Olfr1098	.	synonymous SNV	Olfr1098:NM_146845:exon1:c.A819T:p.V273V	2qD
chr2	86923480	86923480	C	T	exonic	Olfr1098	.	synonymous SNV	Olfr1098:NM_146845:exon1:c.G51A:p.L17L	2qD
chr2	86988798	86988798	G	A	exonic	Olfr1101	.	nonsynonymous SNV	Olfr1101:NM_146591:exon1:c.C377T:p.P126L	2qD
chr2	87001985	87001985	G	A	exonic	Olfr1102	.	synonymous SNV	Olfr1102:NM_207154:exon1:c.G15A:p.P5P	2qD
chr2	87002006	87002006	T	C	exonic	Olfr1102	.	synonymous SNV	Olfr1102:NM_207154:exon1:c.T36C:p.T12T	2qD
chr2	87002198	87002198	T	G	exonic	Olfr1102	.	synonymous SNV	Olfr1102:NM_207154:exon1:c.T228G:p.T76T	2qD
chr2	87002254	87002254	T	C	exonic	Olfr1102	.	nonsynonymous SNV	Olfr1102:NM_207154:exon1:c.T284C:p.V95A	2qD
chr2	87002321	87002321	A	T	exonic	Olfr1102	.	synonymous SNV	Olfr1102:NM_207154:exon1:c.A351T:p.V117V	2qD
chr2	87002771	87002771	C	T	exonic	Olfr1102	.	synonymous SNV	Olfr1102:NM_207154:exon1:c.C801T:p.I267I	2qD
chr2	87033285	87033285	T	C	exonic	Olfr1105	.	nonsynonymous SNV	Olfr1105:NM_001011825:exon1:c.A935G:p.Q312R	2qD
chr2	87033577	87033577	C	T	exonic	Olfr1105	.	nonsynonymous SNV	Olfr1105:NM_001011825:exon1:c.G643A:p.V215I	2qD
chr2	87048470	87048470	T	G	exonic	Olfr1106	.	synonymous SNV	Olfr1106:NM_146752:exon1:c.A765C:p.I255I	2qD
chr2	87048842	87048842	A	G	exonic	Olfr1106	.	synonymous SNV	Olfr1106:NM_146752:exon1:c.T393C:p.T131T	2qD
chr2	87071552	87071552	T	A	exonic	Olfr1107	.	nonsynonymous SNV	Olfr1107:NM_146844:exon1:c.A581T:p.N194I	2qD
chr2	87092487	87092487	C	T	exonic	Olfr1109	.	synonymous SNV	Olfr1109:NM_146766:exon1:c.G909A:p.K303K	2qD
chr2	87092700	87092700	C	T	exonic	Olfr1109	.	synonymous SNV	Olfr1109:NM_146766:exon1:c.G696A:p.E232E	2qD
chr2	87092739	87092739	A	G	exonic	Olfr1109	.	synonymous SNV	Olfr1109:NM_146766:exon1:c.T657C:p.I219I	2qD
chr2	87092868	87092868	G	A	exonic	Olfr1109	.	synonymous SNV	Olfr1109:NM_146766:exon1:c.C528T:p.H176H	2qD
chr2	87092879	87092879	C	T	exonic	Olfr1109	.	nonsynonymous SNV	Olfr1109:NM_146766:exon1:c.G517A:p.V173I	2qD
chr2	87093016	87093016	A	G	exonic	Olfr1109	.	nonsynonymous SNV	Olfr1109:NM_146766:exon1:c.T380C:p.V127A	2qD
chr2	87107585	87107585	G	A	exonic	Olfr259	.	synonymous SNV	Olfr259:NM_146770:exon1:c.C801T:p.S267S	2qD
chr2	87107903	87107903	T	A	exonic	Olfr259	.	synonymous SNV	Olfr259:NM_146770:exon1:c.A483T:p.I161I	2qD
chr2	87108046	87108046	G	A	exonic	Olfr259	.	nonsynonymous SNV	Olfr259:NM_146770:exon1:c.C340T:p.L114F	2qD
chr2	87108131	87108131	A	G	exonic	Olfr259	.	synonymous SNV	Olfr259:NM_146770:exon1:c.T255C:p.F85F	2qD
chr2	87108376	87108376	G	A	exonic	Olfr259	.	nonsynonymous SNV	Olfr259:NM_146770:exon1:c.C10T:p.R4W	2qD
chr2	87136194	87136194	G	A	exonic	Olfr1110	.	synonymous SNV	Olfr1110:NM_146769:exon2:c.C126T:p.N42N	2qD
chr2	87150201	87150201	G	A	exonic	Olfr1111	.	synonymous SNV	Olfr1111:NM_146593:exon1:c.C459T:p.S153S	2qD
chr2	87150230	87150230	A	G	exonic	Olfr1111	.	nonsynonymous SNV	Olfr1111:NM_146593:exon1:c.T430C:p.F144L	2qD
chr2	87150593	87150593	A	T	exonic	Olfr1111	.	nonsynonymous SNV	Olfr1111:NM_146593:exon1:c.T67A:p.L23I	2qD
chr2	87192559	87192559	C	A	exonic	Olfr1112	.	nonsynonymous SNV	Olfr1112:NM_146661:exon1:c.C871A:p.L291M	2qD
chr2	87213087	87213087	A	G	exonic	Olfr1113	.	nonsynonymous SNV	Olfr1113:NM_207565:exon1:c.A194G:p.K65R	2qD
chr2	87252800	87252800	C	T	exonic	Olfr1115	.	nonsynonymous SNV	Olfr1115:NM_146297:exon1:c.C862T:p.L288F	2qD
chr2	87308955	87308955	C	T	exonic	Olfr1118	.	synonymous SNV	Olfr1118:NM_207632:exon1:c.C165T:p.S55S	2qD
chr2	87309025	87309025	C	T	exonic	Olfr1118	.	synonymous SNV	Olfr1118:NM_207632:exon1:c.C235T:p.L79L	2qD
chr2	87309281	87309281	A	G	exonic	Olfr1118	.	nonsynonymous SNV	Olfr1118:NM_207632:exon1:c.A491G:p.K164R	2qD
chr2	87309700	87309700	A	G	exonic	Olfr1118	.	nonsynonymous SNV	Olfr1118:NM_207632:exon1:c.A910G:p.K304E	2qD
chr2	88852289	88852289	T	G	exonic	Olfr1204	.	nonsynonymous SNV	Olfr1204:NM_146463:exon1:c.T338G:p.L113R	2qE1
chr2	89170299	89170299	C	G	exonic	Olfr1225	.	synonymous SNV	Olfr1225:NM_146891:exon1:c.G912C:p.L304L	2qE1
chr2	89170716	89170716	C	A	exonic	Olfr1225	.	synonymous SNV	Olfr1225:NM_146891:exon1:c.G495T:p.L165L	2qE1
chr2	89170815	89170815	A	G	exonic	Olfr1225	.	synonymous SNV	Olfr1225:NM_146891:exon1:c.T396C:p.S132S	2qE1
chr2	89170959	89170959	G	T	exonic	Olfr1225	.	nonsynonymous SNV	Olfr1225:NM_146891:exon1:c.C252A:p.F84L	2qE1
chr2	89193323	89193323	G	A	exonic	Olfr1226	.	nonsynonymous SNV	Olfr1226:NM_146967:exon1:c.C710T:p.S237F	2qE1
chr2	89296927	89296927	G	A	exonic	Olfr1230	.	synonymous SNV	Olfr1230:NM_146789:exon1:c.C342T:p.I114I	2qE1
chr2	89339869	89339869	T	A	exonic	Olfr1233	.	synonymous SNV	Olfr1233:NM_146972:exon2:c.A432T:p.I144I	2qE1
chr2	89340295	89340295	A	G	exonic	Olfr1233	.	synonymous SNV	Olfr1233:NM_146972:exon2:c.T6C:p.N2N	2qE1
chr2	89363275	89363275	G	C	exonic	Olfr1234	.	nonsynonymous SNV	Olfr1234:NM_146973:exon1:c.C153G:p.H51Q	2qE1
chr2	89417764	89417764	G	A	exonic	Olfr1239	.	synonymous SNV	Olfr1239:NM_146970:exon1:c.C648T:p.Y216Y	2qE1
chr2	89527751	89527751	G	A	exonic	Olfr1243	.	synonymous SNV	Olfr1243:NM_146969:exon1:c.C658T:p.L220L	2qE1
chr2	89528058	89528058	G	C	exonic	Olfr1243	.	synonymous SNV	Olfr1243:NM_146969:exon1:c.C351G:p.A117A	2qE1
chr2	89574812	89574812	A	G	exonic	Olfr1245	.	nonsynonymous SNV	Olfr1245:NM_146788:exon1:c.T913C:p.S305P	2qE1
chr2	89575107	89575107	A	G	exonic	Olfr1245	.	synonymous SNV	Olfr1245:NM_146788:exon1:c.T618C:p.I206I	2qE1
chr2	89575431	89575431	C	T	exonic	Olfr1245	.	synonymous SNV	Olfr1245:NM_146788:exon1:c.G294A:p.Q98Q	2qE1
chr2	89590280	89590280	G	A	exonic	Olfr1246	.	synonymous SNV	Olfr1246:NM_146792:exon1:c.C834T:p.P278P	2qE1
chr2	89590377	89590377	G	A	exonic	Olfr1246	.	nonsynonymous SNV	Olfr1246:NM_146792:exon1:c.C737T:p.T246I	2qE1
chr2	89609870	89609870	G	C	exonic	Olfr1247	.	synonymous SNV	Olfr1247:NM_146966:exon1:c.C231G:p.P77P	2qE1
chr2	89656921	89656921	A	G	exonic	Olfr1250	.	synonymous SNV	Olfr1250:NM_146965:exon1:c.T519C:p.D173D	2qE1
chr2	89657014	89657014	C	A	exonic	Olfr1250	.	nonsynonymous SNV	Olfr1250:NM_146965:exon1:c.G426T:p.L142F	2qE1
chr2	89657035	89657035	A	G	exonic	Olfr1250	.	synonymous SNV	Olfr1250:NM_146965:exon1:c.T405C:p.N135N	2qE1
chr2	89657278	89657278	G	T	exonic	Olfr1250	.	synonymous SNV	Olfr1250:NM_146965:exon1:c.C162A:p.G54G	2qE1
chr2	89657375	89657375	T	G	exonic	Olfr1250	.	nonsynonymous SNV	Olfr1250:NM_146965:exon1:c.A65C:p.Q22P	2qE1
chr2	89721599	89721599	C	T	exonic	Olfr1252	.	nonsynonymous SNV	Olfr1252:NM_207568:exon1:c.G511A:p.V171I	2qE1
chr2	89721606	89721606	T	C	exonic	Olfr1252	.	synonymous SNV	Olfr1252:NM_207568:exon1:c.A504G:p.G168G	2qE1
chr2	89752415	89752415	C	A	exonic	Olfr1253	.	nonsynonymous SNV	Olfr1253:NM_146373:exon1:c.G412T:p.V138L	2qE1
chr2	89835864	89835864	A	G	exonic	Olfr1256	.	nonsynonymous SNV	Olfr1256:NM_146983:exon1:c.T80C:p.V27A	2qE1
chr2	89844287	89844287	A	G	exonic	Olfr48	.	nonsynonymous SNV	Olfr48:NM_010990:exon1:c.T685C:p.C229R	2qE1
chr2	89881410	89881410	A	C	exonic	Olfr1257	.	nonsynonymous SNV	Olfr1257:NM_146982:exon1:c.A583C:p.I195L	2qE1
chr2	89929824	89929824	G	A	exonic	Olfr1258	.	nonsynonymous SNV	Olfr1258:NM_146978:exon1:c.G14A:p.S5N	2qE1
chr2	89929828	89929828	T	C	exonic	Olfr1258	.	synonymous SNV	Olfr1258:NM_146978:exon1:c.T18C:p.N6N	2qE1
chr2	89930062	89930062	C	T	exonic	Olfr1258	.	synonymous SNV	Olfr1258:NM_146978:exon1:c.C252T:p.L84L	2qE1
chr2	89930200	89930200	T	C	exonic	Olfr1258	.	synonymous SNV	Olfr1258:NM_146978:exon1:c.T390C:p.Y130Y	2qE1
chr2	89930298	89930298	A	G	exonic	Olfr1258	.	nonsynonymous SNV	Olfr1258:NM_146978:exon1:c.A488G:p.K163R	2qE1
chr2	89943469	89943469	G	C	exonic	Olfr1259	.	synonymous SNV	Olfr1259:NM_146341:exon1:c.C645G:p.S215S	2qE1
chr2	89977868	89977868	C	T	exonic	Olfr1260	.	nonsynonymous SNV	Olfr1260:NM_146981:exon1:c.C89T:p.A30V	2qE1
chr2	89978382	89978382	C	T	exonic	Olfr1260	.	synonymous SNV	Olfr1260:NM_146981:exon1:c.C603T:p.S201S	2qE1
chr2	89978637	89978637	C	T	exonic	Olfr1260	.	synonymous SNV	Olfr1260:NM_146981:exon1:c.C858T:p.T286T	2qE1
chr2	89993588	89993588	A	T	exonic	Olfr1261	.	nonsynonymous SNV	Olfr1261:NM_146474:exon1:c.A194T:p.D65V	2qE1
chr2	90002623	90002623	C	A	exonic	Olfr1262	.	synonymous SNV	Olfr1262:NM_146974:exon1:c.C216A:p.I72I	2qE1
chr2	90002624	90002624	A	G	exonic	Olfr1262	.	nonsynonymous SNV	Olfr1262:NM_146974:exon1:c.A217G:p.T73A	2qE1
chr2	90015525	90015525	C	T	exonic	Olfr1263	.	synonymous SNV	Olfr1263:NM_146794:exon1:c.C594T:p.S198S	2qE1
chr2	90051759	90051759	A	G	exonic	Olfr140	.	synonymous SNV	Olfr140:NM_020515:exon1:c.T564C:p.T188T	2qE1
chr2	90052185	90052185	C	A	exonic	Olfr140	.	synonymous SNV	Olfr140:NM_020515:exon1:c.G138T:p.T46T	2qE1
chr2	90052224	90052224	G	A	exonic	Olfr140	.	synonymous SNV	Olfr140:NM_020515:exon1:c.C99T:p.F33F	2qE1
chr2	90118982	90118982	C	T	exonic	Olfr1269	.	synonymous SNV	Olfr1269:NM_146342:exon1:c.G615A:p.S205S	2qE1
chr2	90138274	90138274	A	G	exonic	Olfr32	.	synonymous SNV	Olfr32:NM_010980:exon5:c.T864C:p.N288N	2qE1
chr2	90139054	90139054	G	A	exonic	Olfr32	.	synonymous SNV	Olfr32:NM_010980:exon5:c.C84T:p.F28F	2qE1
chr2	90252866	90252866	T	C	exonic	Olfr142	.	nonsynonymous SNV	Olfr142:NM_146984:exon1:c.A121G:p.S41G	2qE1
chr2	90266348	90266348	C	G	exonic	Olfr1271	.	synonymous SNV	Olfr1271:NM_146793:exon1:c.G81C:p.V27V	2qE1
chr2	90282301	90282301	G	A	exonic	Olfr1272	.	synonymous SNV	Olfr1272:NM_146980:exon1:c.C273T:p.S91S	2qE1
chr2	90282304	90282304	G	A	exonic	Olfr1272	.	synonymous SNV	Olfr1272:NM_146980:exon1:c.C270T:p.I90I	2qE1
chr2	90282453	90282453	T	C	exonic	Olfr1272	.	nonsynonymous SNV	Olfr1272:NM_146980:exon1:c.A121G:p.S41G	2qE1
chr2	90282493	90282493	C	G	exonic	Olfr1272	.	synonymous SNV	Olfr1272:NM_146980:exon1:c.G81C:p.V27V	2qE1
chr2	90282535	90282535	A	G	exonic	Olfr1272	.	synonymous SNV	Olfr1272:NM_146980:exon1:c.T39C:p.T13T	2qE1
chr2	90282555	90282555	T	C	exonic	Olfr1272	.	nonsynonymous SNV	Olfr1272:NM_146980:exon1:c.A19G:p.I7V	2qE1
chr2	90295964	90295964	T	C	exonic	Olfr1273-ps	.	unknown	UNKNOWN	2qE1
chr2	90296569	90296569	C	T	exonic	Olfr1273-ps	.	unknown	UNKNOWN	2qE1
chr2	90444495	90444495	G	A	exonic	Ptprj	.	synonymous SNV	Ptprj:NM_001135657:exon21:c.C3243T:p.Y1081Y,Ptprj:NM_008982:exon21:c.C3186T:p.Y1062Y	2qE1
chr2	90444498	90444498	G	T	exonic	Ptprj	.	nonsynonymous SNV	Ptprj:NM_001135657:exon21:c.C3240A:p.D1080E,Ptprj:NM_008982:exon21:c.C3183A:p.D1061E	2qE1
chr2	90453053	90453053	G	A	exonic	Ptprj	.	synonymous SNV	Ptprj:NM_001135657:exon13:c.C2667T:p.D889D,Ptprj:NM_008982:exon13:c.C2610T:p.D870D	2qE1
chr2	90909200	90909200	A	G	exonic	Kbtbd4	.	nonsynonymous SNV	Kbtbd4:NM_001311116:exon4:c.A928G:p.I310V,Kbtbd4:NM_001361372:exon4:c.A880G:p.I294V,Kbtbd4:NM_025991:exon4:c.A880G:p.I294V	2qE1
chr2	91041949	91041949	G	A	exonic	Rapsn	.	synonymous SNV	Rapsn:NM_009023:exon3:c.G627A:p.Q209Q	2qE1
chr2	91054272	91054272	A	G	exonic	Psmc3	.	nonsynonymous SNV	Psmc3:NM_008948:exon1:c.A25G:p.T9A	2qE1
chr2	91063399	91063399	A	G	exonic	Slc39a13	.	synonymous SNV	Slc39a13:NM_001290765:exon8:c.T870C:p.A290A,Slc39a13:NM_026721:exon8:c.T831C:p.A277A	2qE1
chr2	91113340	91113340	T	C	exonic	Spi1	.	synonymous SNV	Spi1:NM_001378898:exon3:c.T258C:p.S86S,Spi1:NM_001378899:exon3:c.T135C:p.S45S,Spi1:NM_011355:exon3:c.T228C:p.S76S	2qE1
chr2	91120014	91120014	G	A	exonic	Mybpc3	.	unknown	UNKNOWN	2qE1
chr2	91120049	91120049	T	C	exonic	Mybpc3	.	unknown	UNKNOWN	2qE1
chr2	91122912	91122912	A	G	exonic	Mybpc3	.	unknown	UNKNOWN	2qE1
chr2	91122918	91122918	G	A	exonic	Mybpc3	.	unknown	UNKNOWN	2qE1
chr2	91123938	91123938	T	C	exonic	Mybpc3	.	unknown	UNKNOWN	2qE1
chr2	91123959	91123959	T	A	exonic	Mybpc3	.	unknown	UNKNOWN	2qE1
chr2	91138327	91138327	A	G	exonic	Madd	.	synonymous SNV	Madd:NM_001177720:exon35:c.T4854C:p.L1618L	2qE1
chr2	91152496	91152496	G	A	exonic	Madd	.	synonymous SNV	Madd:NM_001177720:exon27:c.C4158T:p.Y1386Y,Madd:NM_145527:exon28:c.C4158T:p.Y1386Y,Madd:NM_001177719:exon29:c.C4215T:p.Y1405Y	2qE1
chr2	91176169	91176169	G	C	exonic	Madd	.	nonsynonymous SNV	Madd:NM_001177720:exon4:c.C1079G:p.A360G,Madd:NM_001177719:exon5:c.C1079G:p.A360G,Madd:NM_145527:exon5:c.C1079G:p.A360G	2qE1
chr2	91184417	91184417	A	G	exonic	Nr1h3	.	synonymous SNV	Nr1h3:NM_001177730:exon10:c.T1257C:p.H419H,Nr1h3:NM_001355279:exon10:c.T1257C:p.H419H,Nr1h3:NM_013839:exon10:c.T1257C:p.H419H	2qE1
chr2	91184711	91184711	G	A	exonic	Nr1h3	.	synonymous SNV	Nr1h3:NM_001177730:exon9:c.C1135T:p.L379L,Nr1h3:NM_001355279:exon9:c.C1135T:p.L379L,Nr1h3:NM_013839:exon9:c.C1135T:p.L379L	2qE1
chr2	91275142	91275142	A	G	exonic	Arfgap2	.	nonsynonymous SNV	Arfgap2:NM_023854:exon14:c.A1399G:p.N467D,Arfgap2:NM_001166024:exon15:c.A1441G:p.N481D	2qE1
chr2	91488537	91488537	T	C	exonic	Lrp4	.	synonymous SNV	Lrp4:NM_172668:exon20:c.T2718C:p.N906N	2qE1
chr2	91508517	91508517	T	C	exonic	Lrp4	.	synonymous SNV	Lrp4:NM_172668:exon37:c.T5292C:p.Y1764Y	2qE1
chr2	91511641	91511641	T	G	exonic	Lrp4	.	synonymous SNV	Lrp4:NM_172668:exon38:c.T5598G:p.L1866L	2qE1
chr2	91630658	91630658	G	C	exonic	F2	.	nonsynonymous SNV	F2:NM_010168:exon7:c.C731G:p.A244G	2qE1
chr2	91645244	91645244	A	G	exonic	Zfp408	.	nonsynonymous SNV	Zfp408:NM_001033451:exon4:c.T1564C:p.C522R,Zfp408:NM_001347175:exon5:c.T1864C:p.C622R	2qE1
chr2	91645312	91645312	T	C	exonic	Zfp408	.	nonsynonymous SNV	Zfp408:NM_001033451:exon4:c.A1496G:p.Q499R,Zfp408:NM_001347175:exon5:c.A1796G:p.Q599R	2qE1
chr2	91646091	91646091	C	T	exonic	Zfp408	.	synonymous SNV	Zfp408:NM_001033451:exon4:c.G717A:p.K239K,Zfp408:NM_001347175:exon5:c.G1017A:p.K339K	2qE1
chr2	91712222	91712222	C	T	exonic	Harbi1	.	synonymous SNV	Harbi1:NM_001356519:exon1:c.C27T:p.D9D,Harbi1:NM_001356518:exon2:c.C27T:p.D9D,Harbi1:NM_178724:exon2:c.C27T:p.D9D	2qE1
chr2	91917609	91917609	G	A	exonic	Ambra1	.	nonsynonymous SNV	Ambra1:NM_172669:exon18:c.G3689A:p.R1230Q,Ambra1:NM_001080754:exon19:c.G3416A:p.R1139Q	2qE1
chr2	92369635	92369635	T	C	exonic	Large2	.	synonymous SNV	Large2:NM_001290774:exon5:c.A249G:p.K83K,Large2:NM_001166633:exon6:c.A432G:p.K144K,Large2:NM_001290773:exon6:c.A435G:p.K145K,Large2:NM_001290775:exon6:c.A234G:p.K78K,Large2:NM_172670:exon6:c.A432G:p.K144K	2qE1
chr2	92377713	92377713	T	C	exonic	Pex16	.	synonymous SNV	Pex16:NM_145122:exon5:c.T382C:p.L128L	2qE1
chr2	92377742	92377742	A	G	exonic	Pex16	.	synonymous SNV	Pex16:NM_145122:exon5:c.A411G:p.T137T	2qE1
chr2	92383539	92383539	G	A	exonic	1700029I15Rik	.	nonsynonymous SNV	1700029I15Rik:NM_183112:exon3:c.G270A:p.M90I	2qE1
chr2	112778290	112778290	C	T	exonic	Ryr3	.	nonsynonymous SNV	Ryr3:NM_001319156:exon46:c.G6944A:p.R2315Q	2qE3
chr2	118916202	118916202	A	C	exonic	Bahd1	.	nonsynonymous SNV	Bahd1:NM_001045523:exon2:c.A301C:p.S101R	2qE5
chr2	121299836	121299836	C	G	exonic	Map1a	.	nonsynonymous SNV	Map1a:NM_001173506:exon4:c.C418G:p.P140A,Map1a:NM_032393:exon5:c.C1132G:p.P378A	2qE5
chr2	140659757	140659757	T	G	exonic	Flrt3	.	stoploss	Flrt3:NM_001172160:exon3:c.A1950C:p.X650C,Flrt3:NM_178382:exon3:c.A1950C:p.X650C	2qF3
chr2	152628314	152628314	C	T	exonic	Rem1	.	synonymous SNV	Rem1:NM_009047:exon2:c.C219T:p.S73S	2qH1
chr2	152628318	152628318	G	A	exonic	Rem1	.	nonsynonymous SNV	Rem1:NM_009047:exon2:c.G223A:p.G75S	2qH1
chr2	152628332	152628332	A	C	exonic	Rem1	.	synonymous SNV	Rem1:NM_009047:exon2:c.A237C:p.A79A	2qH1
chr2	155901344	155901344	G	C	exonic	Uqcc1	.	nonsynonymous SNV	Uqcc1:NM_001355441:exon6:c.C121G:p.P41A,Uqcc1:NM_001355442:exon6:c.C121G:p.P41A,Uqcc1:NM_001355443:exon6:c.C466G:p.P156A,Uqcc1:NM_018888:exon6:c.C406G:p.P136A	2qH1
chr2	158007950	158007950	C	G	exonic	Tti1	.	synonymous SNV	Tti1:NM_029282:exon2:c.G1368C:p.L456L	2qH1
chr3	15411378	15411378	C	T	exonic	Sirpb1a	.	nonsynonymous SNV	Sirpb1a:NM_001002898:exon3:c.G559A:p.D187N	3qA1
chr3	15411385	15411385	C	T	exonic	Sirpb1a	.	synonymous SNV	Sirpb1a:NM_001002898:exon3:c.G552A:p.K184K	3qA1
chr3	15411410	15411410	C	T	exonic	Sirpb1a	.	nonsynonymous SNV	Sirpb1a:NM_001002898:exon3:c.G527A:p.R176Q	3qA1
chr3	15417060	15417060	T	A	exonic	Sirpb1a	.	synonymous SNV	Sirpb1a:NM_001002898:exon2:c.A207T:p.V69V	3qA1
chr3	15417117	15417117	T	C	exonic	Sirpb1a	.	synonymous SNV	Sirpb1a:NM_001002898:exon2:c.A150G:p.L50L	3qA1
chr3	15548774	15548774	G	A	exonic	Sirpb1b	.	nonsynonymous SNV	Sirpb1b:NM_001173460:exon2:c.C247T:p.H83Y	3qA1
chr3	15548789	15548789	A	G	exonic	Sirpb1b	.	nonsynonymous SNV	Sirpb1b:NM_001173460:exon2:c.T232C:p.S78P	3qA1
chr3	15548790	15548790	C	G	exonic	Sirpb1b	.	nonsynonymous SNV	Sirpb1b:NM_001173460:exon2:c.G231C:p.Q77H	3qA1
chr3	15548792	15548792	G	A	exonic	Sirpb1b	.	stopgain	Sirpb1b:NM_001173460:exon2:c.C229T:p.Q77X	3qA1
chr3	15548814	15548814	T	A	exonic	Sirpb1b	.	synonymous SNV	Sirpb1b:NM_001173460:exon2:c.A207T:p.V69V	3qA1
chr3	15548925	15548925	C	T	exonic	Sirpb1b	.	synonymous SNV	Sirpb1b:NM_001173460:exon2:c.G96A:p.K32K	3qA1
chr3	15548939	15548939	T	C	exonic	Sirpb1b	.	nonsynonymous SNV	Sirpb1b:NM_001173460:exon2:c.A82G:p.M28V	3qA1
chr3	15838649	15838649	C	A	exonic	Sirpb1c	.	nonsynonymous SNV	Sirpb1c:NM_001173459:exon2:c.G390T:p.M130I	3qA1
chr3	15838666	15838666	G	A	exonic	Sirpb1c	.	nonsynonymous SNV	Sirpb1c:NM_001173459:exon2:c.C373T:p.P125S	3qA1
chr3	15838807	15838807	A	G	exonic	Sirpb1c	.	nonsynonymous SNV	Sirpb1c:NM_001173459:exon2:c.T232C:p.S78P	3qA1
chr3	37052443	37052443	A	G	exonic	4932438A13Rik	.	nonsynonymous SNV	4932438A13Rik:NM_172679:exon86:c.A14921G:p.D4974G	3qB
chr3	45381473	45381473	C	G	exonic	Pcdh10	.	nonsynonymous SNV	Pcdh10:NM_001098170:exon1:c.C2221G:p.Q741E,Pcdh10:NM_001098171:exon1:c.C2221G:p.Q741E,Pcdh10:NM_001098172:exon1:c.C2221G:p.Q741E,Pcdh10:NM_011043:exon1:c.C2221G:p.Q741E	3qB
chr3	56005520	56005520	C	G	exonic	Nbea	.	nonsynonymous SNV	Nbea:NM_030595:exon22:c.G2845C:p.A949P	3qC
chr3	69575740	69575740	A	T	exonic	B3galnt1	.	nonsynonymous SNV	B3galnt1:NM_020026:exon3:c.T187A:p.F63I	3qE1
chr3	75071716	75071716	A	C	exonic	Zbbx	.	nonsynonymous SNV	Zbbx:NM_001310529:exon13:c.T1408G:p.S470A,Zbbx:NM_172515:exon13:c.T1423G:p.S475A	3qE3
chr3	75071723	75071723	C	T	exonic	Zbbx	.	synonymous SNV	Zbbx:NM_001310529:exon13:c.G1401A:p.K467K,Zbbx:NM_172515:exon13:c.G1416A:p.K472K	3qE3
chr3	75071754	75071754	A	G	exonic	Zbbx	.	nonsynonymous SNV	Zbbx:NM_001310529:exon13:c.T1370C:p.L457P,Zbbx:NM_172515:exon13:c.T1385C:p.L462P	3qE3
chr3	75112200	75112200	T	C	exonic	Zbbx	.	nonsynonymous SNV	Zbbx:NM_001310529:exon5:c.A202G:p.I68V,Zbbx:NM_172515:exon5:c.A202G:p.I68V	3qE3
chr3	75257770	75257770	A	G	exonic	Serpini2	.	nonsynonymous SNV	Serpini2:NM_026460:exon5:c.T823C:p.F275L	3qE3
chr3	75298113	75298113	G	A	exonic	Wdr49	.	synonymous SNV	Wdr49:NM_001370850:exon13:c.C1995T:p.L665L	3qE3
chr3	75298152	75298152	C	T	exonic	Wdr49	.	synonymous SNV	Wdr49:NM_001370850:exon13:c.G1956A:p.P652P	3qE3
chr3	75323658	75323658	C	T	exonic	Wdr49	.	nonsynonymous SNV	Wdr49:NM_001370850:exon11:c.G1696A:p.D566N	3qE3
chr3	75323712	75323712	G	T	exonic	Wdr49	.	nonsynonymous SNV	Wdr49:NM_001370850:exon11:c.C1642A:p.Q548K	3qE3
chr3	75337792	75337792	C	A	exonic	Wdr49	.	synonymous SNV	Wdr49:NM_001370850:exon7:c.G981T:p.A327A	3qE3
chr3	75396940	75396940	A	G	exonic	Wdr49	.	synonymous SNV	Wdr49:NM_001370850:exon3:c.T438C:p.N146N	3qE3
chr3	75614614	75614614	C	T	exonic	Serpini1	.	synonymous SNV	Serpini1:NM_001357514:exon3:c.C408T:p.N136N,Serpini1:NM_009250:exon3:c.C411T:p.N137N	3qE3
chr3	75903310	75903310	T	G	exonic	Golim4	.	nonsynonymous SNV	Golim4:NM_001291069:exon6:c.A537C:p.R179S,Golim4:NM_175193:exon6:c.A537C:p.R179S	3qE3
chr3	76628976	76628976	C	G	exonic	Fstl5	.	nonsynonymous SNV	Fstl5:NM_001253719:exon12:c.C1403G:p.T468R,Fstl5:NM_178673:exon12:c.C1403G:p.T468R	3qE3
chr3	76708152	76708152	C	T	exonic	Fstl5	.	nonsynonymous SNV	Fstl5:NM_001253719:exon16:c.C2519T:p.T840I,Fstl5:NM_178673:exon16:c.C2519T:p.T840I	3qE3
chr3	79069034	79069034	T	C	exonic	Rapgef2	.	synonymous SNV	Rapgef2:NM_001099624:exon22:c.A4014G:p.T1338T,Rapgef2:NM_001310536:exon22:c.A4020G:p.T1340T	3qE3
chr3	79480798	79480798	C	T	exonic	Fnip2	.	synonymous SNV	Fnip2:NM_001162999:exon13:c.G2535A:p.S845S	3qE3
chr3	79839196	79839196	C	T	exonic	Tmem144	.	synonymous SNV	Tmem144:NM_001379542:exon2:c.G51A:p.A17A,Tmem144:NM_001379543:exon2:c.G51A:p.A17A,Tmem144:NM_027495:exon2:c.G51A:p.A17A	3qE3
chr3	79886277	79886277	T	C	exonic	Gask1b	.	synonymous SNV	Gask1b:NM_133187:exon1:c.T51C:p.S17S	3qE3
chr3	80692386	80692386	A	G	exonic	Gria2	.	synonymous SNV	Gria2:NM_001039195:exon13:c.T2190C:p.N730N,Gria2:NM_001083806:exon13:c.T2190C:p.N730N,Gria2:NM_001357924:exon13:c.T2190C:p.N730N,Gria2:NM_001357927:exon13:c.T2190C:p.N730N,Gria2:NM_013540:exon13:c.T2190C:p.N730N	3qE3
chr3	81141484	81141484	A	G	exonic	Pdgfc	.	synonymous SNV	Pdgfc:NM_019971:exon2:c.A198G:p.T66T	3qE3
chr3	81961509	81961509	C	T	exonic	Tdo2	.	synonymous SNV	Tdo2:NM_019911:exon10:c.G900A:p.E300E	3qE3
chr3	82105999	82105999	C	T	exonic	Gucy1a1	.	synonymous SNV	Gucy1a1:NM_001356987:exon6:c.G1335A:p.E445E,Gucy1a1:NM_001356988:exon6:c.G1335A:p.E445E,Gucy1a1:NM_021896:exon6:c.G1335A:p.E445E	3qE3
chr3	82371230	82371230	A	G	exonic	Map9	.	nonsynonymous SNV	Map9:NM_001081230:exon5:c.A536G:p.Q179R,Map9:NM_001356457:exon5:c.A536G:p.Q179R	3qE3
chr3	82374190	82374190	T	C	exonic	Map9	.	nonsynonymous SNV	Map9:NM_001081230:exon6:c.T791C:p.V264A,Map9:NM_001356457:exon6:c.T791C:p.V264A	3qE3
chr3	82374197	82374197	A	G	exonic	Map9	.	nonsynonymous SNV	Map9:NM_001081230:exon6:c.A798G:p.I266M,Map9:NM_001356457:exon6:c.A798G:p.I266M	3qE3
chr3	83014181	83014181	C	T	exonic	Fgg	.	synonymous SNV	Fgg:NM_001317105:exon9:c.C1170T:p.D390D,Fgg:NM_133862:exon9:c.C1170T:p.D390D	3qE3
chr3	83026233	83026233	A	G	exonic	Fga	.	nonsynonymous SNV	Fga:NM_001111048:exon1:c.A19G:p.T7A,Fga:NM_010196:exon1:c.A19G:p.T7A	3qE3
chr3	83028572	83028572	A	G	exonic	Fga	.	synonymous SNV	Fga:NM_001111048:exon2:c.A105G:p.V35V,Fga:NM_010196:exon2:c.A105G:p.V35V	3qE3
chr3	83029228	83029228	C	T	exonic	Fga	.	synonymous SNV	Fga:NM_001111048:exon3:c.C330T:p.I110I,Fga:NM_010196:exon3:c.C330T:p.I110I	3qE3
chr3	83043799	83043799	C	T	exonic	Fgb	.	synonymous SNV	Fgb:NM_181849:exon6:c.G906A:p.A302A	3qE3
chr3	83043801	83043801	C	A	exonic	Fgb	.	nonsynonymous SNV	Fgb:NM_181849:exon6:c.G904T:p.A302S	3qE3
chr3	83043811	83043811	G	A	exonic	Fgb	.	synonymous SNV	Fgb:NM_181849:exon6:c.C894T:p.T298T	3qE3
chr3	83043826	83043826	G	A	exonic	Fgb	.	synonymous SNV	Fgb:NM_181849:exon6:c.C879T:p.F293F	3qE3
chr3	83046847	83046847	G	A	exonic	Fgb	.	nonsynonymous SNV	Fgb:NM_181849:exon2:c.C83T:p.T28M	3qE3
chr3	83128703	83128703	T	G	exonic	Dchs2	.	synonymous SNV	Dchs2:NM_001357165:exon1:c.T756G:p.A252A	3qE3
chr3	83129319	83129319	A	G	exonic	Dchs2	.	nonsynonymous SNV	Dchs2:NM_001357165:exon1:c.A1372G:p.S458G	3qE3
chr3	83129939	83129939	G	T	exonic	Dchs2	.	synonymous SNV	Dchs2:NM_001357165:exon1:c.G1992T:p.L664L	3qE3
chr3	83304698	83304698	G	T	exonic	Dchs2	.	nonsynonymous SNV	Dchs2:NM_001357165:exon13:c.G5803T:p.A1935S	3qE3
chr3	83837524	83837524	A	G	exonic	Tlr2	.	synonymous SNV	Tlr2:NM_011905:exon3:c.T1251C:p.S417S	3qE3
chr3	83838529	83838529	C	A	exonic	Tlr2	.	nonsynonymous SNV	Tlr2:NM_011905:exon3:c.G246T:p.M82I	3qE3
chr3	83932845	83932845	A	C	exonic	Tmem131l	.	nonsynonymous SNV	Tmem131l:NM_172681:exon17:c.T1687G:p.S563A	3qF1
chr3	84192180	84192180	A	G	exonic	Trim2	.	synonymous SNV	Trim2:NM_001271725:exon5:c.T684C:p.D228D,Trim2:NM_001271726:exon5:c.T606C:p.D202D,Trim2:NM_001271727:exon5:c.T606C:p.D202D,Trim2:NM_001271728:exon5:c.T606C:p.D202D,Trim2:NM_030706:exon5:c.T657C:p.D219D	3qF1
chr3	84455056	84455056	G	A	exonic	Fhdc1	.	synonymous SNV	Fhdc1:NM_001033301:exon7:c.C856T:p.L286L,Fhdc1:NM_001205355:exon7:c.C856T:p.L286L	3qF1
chr3	84519584	84519584	T	C	exonic	Arfip1	.	synonymous SNV	Arfip1:NM_001293801:exon5:c.A435G:p.K145K,Arfip1:NM_001081093:exon6:c.A531G:p.K177K	3qF1
chr3	84519695	84519695	C	T	exonic	Arfip1	.	synonymous SNV	Arfip1:NM_001293801:exon5:c.G324A:p.R108R,Arfip1:NM_001081093:exon6:c.G420A:p.R140R	3qF1
chr3	84594044	84594044	A	G	exonic	Tigd4	.	synonymous SNV	Tigd4:NM_207278:exon1:c.A267G:p.E89E	3qF1
chr3	84903911	84903911	A	G	exonic	Fbxw7	.	synonymous SNV	Fbxw7:NM_001177774:exon3:c.A342G:p.E114E,Fbxw7:NM_001177773:exon4:c.A342G:p.E114E	3qF1
chr3	84954904	84954904	A	G	exonic	Fbxw7	.	synonymous SNV	Fbxw7:NM_080428:exon2:c.A297G:p.E99E,Fbxw7:NM_001177774:exon4:c.A540G:p.E180E,Fbxw7:NM_001177773:exon5:c.A540G:p.E180E	3qF1
chr3	85994027	85994027	C	T	exonic	Prss48	.	nonsynonymous SNV	Prss48:NM_001001650:exon6:c.G732A:p.M244I	3qF1
chr3	86000505	86000505	C	T	exonic	Prss48	.	nonsynonymous SNV	Prss48:NM_001001650:exon3:c.G128A:p.G43D	3qF1
chr3	86138052	86138052	G	A	exonic	Rps3a1	.	synonymous SNV	Rps3a1:NM_016959:exon6:c.C732T:p.D244D	3qF1
chr3	86139069	86139069	A	G	exonic	Rps3a1	.	synonymous SNV	Rps3a1:NM_016959:exon4:c.T534C:p.T178T	3qF1
chr3	86141269	86141269	G	A	exonic	Rps3a1	.	synonymous SNV	Rps3a1:NM_016959:exon3:c.C324T:p.D108D	3qF1
chr3	86323786	86323786	G	A	exonic	Lrba	.	synonymous SNV	Lrba:NM_001077687:exon18:c.G2223A:p.K741K,Lrba:NM_001077688:exon18:c.G2223A:p.K741K,Lrba:NM_030695:exon18:c.G2223A:p.K741K	3qF1
chr3	86348196	86348196	A	G	exonic	Lrba	.	synonymous SNV	Lrba:NM_001077687:exon23:c.A2844G:p.G948G,Lrba:NM_001077688:exon23:c.A2844G:p.G948G,Lrba:NM_030695:exon23:c.A2844G:p.G948G	3qF1
chr3	86920030	86920030	G	A	exonic	Dclk2	.	synonymous SNV	Dclk2:NM_001195496:exon1:c.C141T:p.S47S,Dclk2:NM_001195497:exon1:c.C141T:p.S47S,Dclk2:NM_001195498:exon1:c.C141T:p.S47S,Dclk2:NM_001195499:exon1:c.C141T:p.S47S,Dclk2:NM_001195500:exon1:c.C141T:p.S47S,Dclk2:NM_001357460:exon1:c.C141T:p.S47S,Dclk2:NM_027539:exon1:c.C141T:p.S47S	3qF1
chr3	87252695	87252695	A	C	exonic	Fcrls	.	synonymous SNV	Fcrls:NM_030707:exon7:c.T1251G:p.V417V	3qF1
chr3	87257333	87257333	A	G	exonic	Fcrls	.	synonymous SNV	Fcrls:NM_030707:exon5:c.T885C:p.S295S	3qF1
chr3	87257389	87257389	T	C	exonic	Fcrls	.	nonsynonymous SNV	Fcrls:NM_030707:exon5:c.A829G:p.S277G	3qF1
chr3	87257483	87257483	T	C	exonic	Fcrls	.	synonymous SNV	Fcrls:NM_030707:exon5:c.A735G:p.T245T	3qF1
chr3	87257495	87257495	A	G	exonic	Fcrls	.	synonymous SNV	Fcrls:NM_030707:exon5:c.T723C:p.T241T	3qF1
chr3	87257519	87257519	A	C	exonic	Fcrls	.	synonymous SNV	Fcrls:NM_030707:exon5:c.T699G:p.L233L	3qF1
chr3	87257588	87257588	C	T	exonic	Fcrls	.	synonymous SNV	Fcrls:NM_030707:exon5:c.G630A:p.E210E	3qF1
chr3	87384839	87384839	C	G	exonic	Fcrl1	.	nonsynonymous SNV	Fcrl1:NM_001136236:exon3:c.C304G:p.P102A,Fcrl1:NM_001310545:exon3:c.C304G:p.P102A,Fcrl1:NM_178165:exon3:c.C304G:p.P102A,Fcrl1:NM_153090:exon4:c.C364G:p.P122A	3qF1
chr3	87385732	87385732	T	C	exonic	Fcrl1	.	nonsynonymous SNV	Fcrl1:NM_001310545:exon5:c.T695C:p.L232P,Fcrl1:NM_178165:exon5:c.T695C:p.L232P,Fcrl1:NM_153090:exon6:c.T755C:p.L252P	3qF1
chr3	87386753	87386753	A	G	exonic	Fcrl1	.	synonymous SNV	Fcrl1:NM_001136236:exon5:c.A621G:p.Q207Q,Fcrl1:NM_001310545:exon6:c.A750G:p.Q250Q,Fcrl1:NM_178165:exon6:c.A750G:p.Q250Q,Fcrl1:NM_153090:exon7:c.A810G:p.Q270Q	3qF1
chr3	87443666	87443666	C	A	exonic	Fcrl5	.	nonsynonymous SNV	Fcrl5:NM_001113238:exon3:c.C218A:p.P73H,Fcrl5:NM_183222:exon4:c.C482A:p.P161H	3qF1
chr3	87443680	87443680	T	C	exonic	Fcrl5	.	nonsynonymous SNV	Fcrl5:NM_001113238:exon3:c.T232C:p.F78L,Fcrl5:NM_183222:exon4:c.T496C:p.F166L	3qF1
chr3	87443684	87443684	A	C	exonic	Fcrl5	.	nonsynonymous SNV	Fcrl5:NM_001113238:exon3:c.A236C:p.Y79S,Fcrl5:NM_183222:exon4:c.A500C:p.Y167S	3qF1
chr3	87443693	87443693	G	A	exonic	Fcrl5	.	nonsynonymous SNV	Fcrl5:NM_001113238:exon3:c.G245A:p.R82H,Fcrl5:NM_183222:exon4:c.G509A:p.R170H	3qF1
chr3	87443780	87443780	T	G	exonic	Fcrl5	.	nonsynonymous SNV	Fcrl5:NM_001113238:exon3:c.T332G:p.V111G,Fcrl5:NM_183222:exon4:c.T596G:p.V199G	3qF1
chr3	87444307	87444307	T	A	exonic	Fcrl5	.	nonsynonymous SNV	Fcrl5:NM_001113238:exon4:c.T597A:p.S199R,Fcrl5:NM_183222:exon5:c.T861A:p.S287R	3qF1
chr3	87446463	87446463	T	C	exonic	Fcrl5	.	nonsynonymous SNV	Fcrl5:NM_001113238:exon5:c.T850C:p.Y284H,Fcrl5:NM_183222:exon6:c.T1114C:p.Y372H	3qF1
chr3	87446476	87446476	A	C	exonic	Fcrl5	.	nonsynonymous SNV	Fcrl5:NM_001113238:exon5:c.A863C:p.N288T,Fcrl5:NM_183222:exon6:c.A1127C:p.N376T	3qF1
chr3	87457108	87457108	G	A	exonic	Fcrl5	.	synonymous SNV	Fcrl5:NM_001113238:exon9:c.G1329A:p.R443R,Fcrl5:NM_183222:exon10:c.G1593A:p.R531R	3qF1
chr3	87536340	87536340	G	T	exonic	Etv3	.	nonsynonymous SNV	Etv3:NM_001083318:exon5:c.G1230T:p.M410I,Etv3:NM_001286844:exon5:c.G1230T:p.M410I,Etv3:NM_012051:exon5:c.G1230T:p.M410I	3qF1
chr3	87554951	87554951	T	G	exonic	Etv3l	.	synonymous SNV	Etv3l:NM_001370856:exon3:c.T102G:p.S34S	3qF1
chr3	87555473	87555473	C	T	exonic	Etv3l	.	nonsynonymous SNV	Etv3l:NM_001370856:exon4:c.C424T:p.R142C	3qF1
chr3	87560146	87560146	C	T	exonic	Etv3l	.	nonsynonymous SNV	Etv3l:NM_001370856:exon6:c.C649T:p.R217W	3qF1
chr3	87560156	87560156	A	G	exonic	Etv3l	.	nonsynonymous SNV	Etv3l:NM_001370856:exon6:c.A659G:p.Q220R	3qF1
chr3	87560556	87560556	T	C	exonic	Etv3l	.	synonymous SNV	Etv3l:NM_001370856:exon6:c.T1059C:p.P353P	3qF1
chr3	87687922	87687922	T	C	exonic	Arhgef11	.	nonsynonymous SNV	Arhgef11:NM_001003912:exon6:c.T440C:p.M147T,Arhgef11:NM_001360195:exon6:c.T440C:p.M147T	3qF1
chr3	87728530	87728530	T	C	exonic	Arhgef11	.	nonsynonymous SNV	Arhgef11:NM_001360197:exon28:c.T847C:p.Y283H,Arhgef11:NM_001003912:exon29:c.T2797C:p.Y933H,Arhgef11:NM_001360195:exon29:c.T2710C:p.Y904H	3qF1
chr3	87728532	87728532	T	C	exonic	Arhgef11	.	synonymous SNV	Arhgef11:NM_001360197:exon28:c.T849C:p.Y283Y,Arhgef11:NM_001003912:exon29:c.T2799C:p.Y933Y,Arhgef11:NM_001360195:exon29:c.T2712C:p.Y904Y	3qF1
chr3	87741020	87741020	T	C	exonic	Lrrc71	.	synonymous SNV	Lrrc71:NM_028971:exon12:c.A1284G:p.T428T	3qF1
chr3	87741029	87741029	T	A	exonic	Lrrc71	.	synonymous SNV	Lrrc71:NM_028971:exon12:c.A1275T:p.G425G	3qF1
chr3	87743336	87743336	T	C	exonic	Lrrc71	.	synonymous SNV	Lrrc71:NM_028971:exon6:c.A618G:p.P206P	3qF1
chr3	87751144	87751144	A	G	exonic	Pear1	.	synonymous SNV	Pear1:NM_001032414:exon22:c.T2919C:p.S973S,Pear1:NM_001289600:exon22:c.T2682C:p.S894S,Pear1:NM_001032413:exon23:c.T2919C:p.S973S,Pear1:NM_001289601:exon24:c.T2163C:p.S721S,Pear1:NM_028460:exon24:c.T2919C:p.S973S,Pear1:NM_152799:exon24:c.T2919C:p.S973S	3qF1
chr3	87751246	87751246	G	A	exonic	Pear1	.	synonymous SNV	Pear1:NM_001032414:exon22:c.C2817T:p.S939S,Pear1:NM_001289600:exon22:c.C2580T:p.S860S,Pear1:NM_001032413:exon23:c.C2817T:p.S939S,Pear1:NM_001289601:exon24:c.C2061T:p.S687S,Pear1:NM_028460:exon24:c.C2817T:p.S939S,Pear1:NM_152799:exon24:c.C2817T:p.S939S	3qF1
chr3	87751459	87751459	C	T	exonic	Pear1	.	synonymous SNV	Pear1:NM_001032414:exon21:c.G2688A:p.P896P,Pear1:NM_001289600:exon21:c.G2451A:p.P817P,Pear1:NM_001032413:exon22:c.G2688A:p.P896P,Pear1:NM_001289601:exon23:c.G1932A:p.P644P,Pear1:NM_028460:exon23:c.G2688A:p.P896P,Pear1:NM_152799:exon23:c.G2688A:p.P896P	3qF1
chr3	87751654	87751654	T	G	exonic	Pear1	.	nonsynonymous SNV	Pear1:NM_001032414:exon20:c.A2628C:p.E876D,Pear1:NM_001289600:exon20:c.A2391C:p.E797D,Pear1:NM_001032413:exon21:c.A2628C:p.E876D,Pear1:NM_001289601:exon22:c.A1872C:p.E624D,Pear1:NM_028460:exon22:c.A2628C:p.E876D,Pear1:NM_152799:exon22:c.A2628C:p.E876D	3qF1
chr3	87751697	87751697	A	G	exonic	Pear1	.	nonsynonymous SNV	Pear1:NM_001032414:exon20:c.T2585C:p.V862A,Pear1:NM_001289600:exon20:c.T2348C:p.V783A,Pear1:NM_001032413:exon21:c.T2585C:p.V862A,Pear1:NM_001289601:exon22:c.T1829C:p.V610A,Pear1:NM_028460:exon22:c.T2585C:p.V862A,Pear1:NM_152799:exon22:c.T2585C:p.V862A	3qF1
chr3	87751698	87751698	C	T	exonic	Pear1	.	nonsynonymous SNV	Pear1:NM_001032414:exon20:c.G2584A:p.V862I,Pear1:NM_001289600:exon20:c.G2347A:p.V783I,Pear1:NM_001032413:exon21:c.G2584A:p.V862I,Pear1:NM_001289601:exon22:c.G1828A:p.V610I,Pear1:NM_028460:exon22:c.G2584A:p.V862I,Pear1:NM_152799:exon22:c.G2584A:p.V862I	3qF1
chr3	87754576	87754576	G	A	exonic	Pear1	.	synonymous SNV	Pear1:NM_001032414:exon12:c.C1491T:p.D497D,Pear1:NM_001289600:exon12:c.C1254T:p.D418D,Pear1:NM_001032413:exon13:c.C1491T:p.D497D,Pear1:NM_001289601:exon14:c.C735T:p.D245D,Pear1:NM_028460:exon14:c.C1491T:p.D497D,Pear1:NM_152799:exon14:c.C1491T:p.D497D	3qF1
chr3	87869877	87869877	C	T	exonic	Prcc	.	synonymous SNV	Prcc:NM_033573:exon3:c.G789A:p.E263E	3qF1
chr3	87885242	87885242	C	T	exonic	Prcc	.	nonsynonymous SNV	Prcc:NM_033573:exon1:c.G101A:p.G34E	3qF1
chr3	87914084	87914084	C	T	exonic	Hdgf	.	synonymous SNV	Hdgf:NM_001331052:exon4:c.C240T:p.P80P,Hdgf:NM_008231:exon4:c.C336T:p.P112P,Hdgf:NM_001331051:exon5:c.C249T:p.P83P	3qF1
chr3	87931998	87931998	C	T	exonic	Isg20l2	.	nonsynonymous SNV	Isg20l2:NM_177663:exon2:c.C515T:p.P172L	3qF1
chr3	87932140	87932140	A	G	exonic	Isg20l2	.	synonymous SNV	Isg20l2:NM_177663:exon2:c.A657G:p.V219V	3qF1
chr3	87932152	87932152	T	C	exonic	Isg20l2	.	synonymous SNV	Isg20l2:NM_177663:exon2:c.T669C:p.G223G	3qF1
chr3	87974845	87974845	A	G	exonic	Nes	.	nonsynonymous SNV	Nes:NM_016701:exon3:c.A955G:p.R319G	3qF1
chr3	87975668	87975668	C	T	exonic	Nes	.	synonymous SNV	Nes:NM_016701:exon4:c.C1233T:p.P411P	3qF1
chr3	87976039	87976039	T	A	exonic	Nes	.	nonsynonymous SNV	Nes:NM_016701:exon4:c.T1604A:p.M535K	3qF1
chr3	87976065	87976065	G	A	exonic	Nes	.	nonsynonymous SNV	Nes:NM_016701:exon4:c.G1630A:p.E544K	3qF1
chr3	87976144	87976144	C	T	exonic	Nes	.	nonsynonymous SNV	Nes:NM_016701:exon4:c.C1709T:p.S570L	3qF1
chr3	87976352	87976352	G	A	exonic	Nes	.	synonymous SNV	Nes:NM_016701:exon4:c.G1917A:p.Q639Q	3qF1
chr3	87976376	87976376	A	G	exonic	Nes	.	synonymous SNV	Nes:NM_016701:exon4:c.A1941G:p.E647E	3qF1
chr3	87976454	87976454	G	A	exonic	Nes	.	nonsynonymous SNV	Nes:NM_016701:exon4:c.G2019A:p.M673I	3qF1
chr3	87976987	87976987	T	C	exonic	Nes	.	nonsynonymous SNV	Nes:NM_016701:exon4:c.T2552C:p.L851P	3qF1
chr3	87976988	87976988	G	A	exonic	Nes	.	synonymous SNV	Nes:NM_016701:exon4:c.G2553A:p.L851L	3qF1
chr3	87976999	87976999	A	G	exonic	Nes	.	nonsynonymous SNV	Nes:NM_016701:exon4:c.A2564G:p.K855R	3qF1
chr3	87977135	87977135	A	C	exonic	Nes	.	nonsynonymous SNV	Nes:NM_016701:exon4:c.A2700C:p.E900D	3qF1
chr3	87977457	87977457	A	G	exonic	Nes	.	nonsynonymous SNV	Nes:NM_016701:exon4:c.A3022G:p.R1008G	3qF1
chr3	87978011	87978011	G	A	exonic	Nes	.	synonymous SNV	Nes:NM_016701:exon4:c.G3576A:p.V1192V	3qF1
chr3	87978416	87978416	A	G	exonic	Nes	.	synonymous SNV	Nes:NM_016701:exon4:c.A3981G:p.A1327A	3qF1
chr3	87978479	87978479	G	A	exonic	Nes	.	synonymous SNV	Nes:NM_016701:exon4:c.G4044A:p.G1348G	3qF1
chr3	87978645	87978645	G	A	exonic	Nes	.	nonsynonymous SNV	Nes:NM_016701:exon4:c.G4210A:p.A1404T	3qF1
chr3	87979207	87979207	C	T	exonic	Nes	.	nonsynonymous SNV	Nes:NM_016701:exon4:c.C4772T:p.A1591V	3qF1
chr3	87979364	87979364	C	A	exonic	Nes	.	synonymous SNV	Nes:NM_016701:exon4:c.C4929A:p.P1643P	3qF1
chr3	87979485	87979485	A	G	exonic	Nes	.	nonsynonymous SNV	Nes:NM_016701:exon4:c.A5050G:p.T1684A	3qF1
chr3	87979490	87979490	G	A	exonic	Nes	.	synonymous SNV	Nes:NM_016701:exon4:c.G5055A:p.Q1685Q	3qF1
chr3	88247513	88247513	A	G	exonic	Rhbg	.	nonsynonymous SNV	Rhbg:NM_021375:exon4:c.T583C:p.W195R	3qF1
chr3	88635697	88635697	A	C	exonic	Arhgef2	.	synonymous SNV	Arhgef2:NM_001198912:exon10:c.A1120C:p.R374R,Arhgef2:NM_001198913:exon10:c.A1114C:p.R372R,Arhgef2:NM_001377126:exon10:c.A1177C:p.R393R,Arhgef2:NM_008487:exon10:c.A1201C:p.R401R,Arhgef2:NM_001198911:exon11:c.A1150C:p.R384R	3qF1
chr3	88854680	88854680	C	T	exonic	Gon4l	.	nonsynonymous SNV	Gon4l:NM_001242372:exon4:c.C773T:p.P258L,Gon4l:NM_027389:exon4:c.C773T:p.P258L	3qF1
chr3	88895267	88895267	G	T	exonic	Gon4l	.	nonsynonymous SNV	Gon4l:NM_027389:exon21:c.G3184T:p.A1062S,Gon4l:NM_001242372:exon22:c.G3235T:p.A1079S	3qF1
chr3	88908282	88908282	T	C	exonic	Gon4l	.	nonsynonymous SNV	Gon4l:NM_027389:exon30:c.T6151C:p.S2051P,Gon4l:NM_001242372:exon31:c.T6202C:p.S2068P	3qF1
chr3	88912751	88912751	A	T	exonic	Msto1	.	nonsynonymous SNV	Msto1:NM_144898:exon4:c.T318A:p.D106E	3qF1
chr3	88966304	88966304	G	A	exonic	Ash1l	.	synonymous SNV	Ash1l:NM_138679:exon1:c.G393A:p.K131K	3qF1
chr3	88981265	88981265	C	T	exonic	Ash1l	.	synonymous SNV	Ash1l:NM_138679:exon2:c.C450T:p.D150D	3qF1
chr3	89170304	89170304	A	G	exonic	Clk2;Gm45927	.	nonsynonymous SNV	Clk2:NM_001163432:exon6:c.A560G:p.Q187R,Gm45927:NM_001310016:exon6:c.A566G:p.Q189R,Clk2:NM_007712:exon6:c.A563G:p.Q188R	3qF1
chr3	89367748	89367748	G	A	exonic	Dcst2	.	nonsynonymous SNV	Dcst2:NM_001370853:exon6:c.G797A:p.R266H	3qF1
chr3	89447403	89447403	T	C	exonic	Pbxip1	.	nonsynonymous SNV	Pbxip1:NM_146131:exon10:c.T1228C:p.W410R	3qF1
chr3	89662717	89662717	G	T	exonic	Kcnn3	.	synonymous SNV	Kcnn3:NM_080466:exon7:c.G1836T:p.L612L	3qF1
chr3	89887167	89887167	A	G	exonic	Il6ra	.	synonymous SNV	Il6ra:NM_001310676:exon4:c.T486C:p.C162C,Il6ra:NM_010559:exon4:c.T486C:p.C162C	3qF1
chr3	89941219	89941219	C	A	exonic	Atp8b2	.	synonymous SNV	Atp8b2:NM_001368650:exon27:c.G3564T:p.L1188L,Atp8b2:NM_001081182:exon28:c.G3507T:p.L1169L	3qF1
chr3	89943851	89943851	C	G	exonic	Atp8b2	.	synonymous SNV	Atp8b2:NM_001368650:exon24:c.G2844C:p.P948P,Atp8b2:NM_001081182:exon25:c.G2787C:p.P929P	3qF1
chr3	89946181	89946181	C	G	exonic	Atp8b2	.	synonymous SNV	Atp8b2:NM_001368650:exon19:c.G2196C:p.L732L,Atp8b2:NM_001081182:exon20:c.G2139C:p.L713L	3qF1
chr3	89957039	89957039	T	C	exonic	Atp8b2	.	synonymous SNV	Atp8b2:NM_001368650:exon8:c.A618G:p.G206G,Atp8b2:NM_001081182:exon9:c.A561G:p.G187G	3qF1
chr3	90180171	90180171	A	G	exonic	Nup210l	.	nonsynonymous SNV	Nup210l:NM_029937:exon24:c.A3250G:p.I1084V	3qF1
chr3	90198129	90198129	A	G	exonic	Nup210l	.	nonsynonymous SNV	Nup210l:NM_029937:exon33:c.A4583G:p.N1528S	3qF1
chr3	90198155	90198155	A	G	exonic	Nup210l	.	nonsynonymous SNV	Nup210l:NM_029937:exon33:c.A4609G:p.N1537D	3qF1
chr3	90207352	90207352	G	A	exonic	Nup210l	.	nonsynonymous SNV	Nup210l:NM_029937:exon37:c.G5233A:p.V1745I	3qF1
chr3	90207378	90207378	C	T	exonic	Nup210l	.	synonymous SNV	Nup210l:NM_029937:exon37:c.C5259T:p.F1753F	3qF1
chr3	90207405	90207405	C	G	exonic	Nup210l	.	synonymous SNV	Nup210l:NM_029937:exon37:c.C5286G:p.P1762P	3qF1
chr3	90211813	90211813	C	T	exonic	Nup210l	.	nonsynonymous SNV	Nup210l:NM_029937:exon39:c.C5528T:p.T1843I	3qF1
chr3	90225562	90225562	G	C	exonic	Rab13	.	nonsynonymous SNV	Rab13:NM_001293741:exon8:c.G345C:p.K115N,Rab13:NM_026677:exon8:c.G588C:p.K196N	3qF1
chr3	90235434	90235434	T	C	exonic	Jtb	.	synonymous SNV	Jtb:NM_206924:exon5:c.T336C:p.V112V	3qF1
chr3	90235516	90235516	A	C	exonic	Jtb	.	synonymous SNV	Jtb:NM_206924:exon5:c.A418C:p.R140R	3qF1
chr3	90237890	90237890	G	A	exonic	Creb3l4	.	synonymous SNV	Creb3l4:NM_001307935:exon8:c.C789T:p.N263N,Creb3l4:NM_001307934:exon10:c.C954T:p.N318N,Creb3l4:NM_030080:exon10:c.C954T:p.N318N	3qF1
chr3	90389370	90389370	T	C	exonic	Slc27a3	.	nonsynonymous SNV	Slc27a3:NM_011988:exon1:c.A421G:p.R141G	3qF1
chr3	90464967	90464967	A	C	exonic	Npr1	.	synonymous SNV	Npr1:NM_008727:exon1:c.T537G:p.L179L	3qF1
chr3	90613775	90613775	C	T	exonic	S100a6	.	synonymous SNV	S100a6:NM_011313:exon2:c.C9T:p.C3C	3qF1
chr3	92719095	92719095	C	T	exonic	Lce1f	.	nonsynonymous SNV	Lce1f:NM_026394:exon2:c.G254A:p.R85H	3qF1
chr3	92789298	92789298	A	C	exonic	Lce1j	.	nonsynonymous SNV	Lce1j:NM_001281499:exon2:c.T172G:p.C58G	3qF1
chr3	92825461	92825461	T	C	exonic	Kprp	.	nonsynonymous SNV	Kprp:NM_028629:exon2:c.A281G:p.Y94C	3qF1
chr3	92967998	92967998	G	A	exonic	Lce3e	.	nonsynonymous SNV	Lce3e:NM_001254725:exon2:c.G260A:p.G87D	3qF1
chr3	92968008	92968008	C	T	exonic	Lce3e	.	synonymous SNV	Lce3e:NM_001254725:exon2:c.C270T:p.C90C	3qF1
chr3	92968009	92968009	A	G	exonic	Lce3e	.	nonsynonymous SNV	Lce3e:NM_001254725:exon2:c.A271G:p.S91G	3qF1
chr3	92993133	92993133	G	A	exonic	Lce3f	.	nonsynonymous SNV	Lce3f:NM_001018079:exon2:c.G260A:p.G87D	3qF1
chr3	92993134	92993134	C	T	exonic	Lce3f	.	synonymous SNV	Lce3f:NM_001018079:exon2:c.C261T:p.G87G	3qF1
chr3	92993158	92993158	G	C	exonic	Lce3f	.	synonymous SNV	Lce3f:NM_001018079:exon2:c.G285C:p.G95G	3qF1
chr3	93073790	93073790	C	T	exonic	Tdpoz8	.	synonymous SNV	Tdpoz8:NM_001177694:exon1:c.C270T:p.F90F	3qF1
chr3	93073799	93073799	T	C	exonic	Tdpoz8	.	synonymous SNV	Tdpoz8:NM_001177694:exon1:c.T279C:p.C93C	3qF1
chr3	93073810	93073810	C	G	exonic	Tdpoz8	.	nonsynonymous SNV	Tdpoz8:NM_001177694:exon1:c.C290G:p.A97G	3qF1
chr3	93074621	93074621	T	G	exonic	Tdpoz8	.	synonymous SNV	Tdpoz8:NM_001177694:exon1:c.T1101G:p.P367P,Tdpoz8:NM_001034860:exon3:c.T723G:p.P241P	3qF1
chr3	93074623	93074623	C	A	exonic	Tdpoz8	.	nonsynonymous SNV	Tdpoz8:NM_001177694:exon1:c.C1103A:p.T368N,Tdpoz8:NM_001034860:exon3:c.C725A:p.T242N	3qF1
chr3	93203383	93203383	C	G	exonic	Flg2	.	nonsynonymous SNV	Flg2:NM_001013804:exon4:c.C2717G:p.P906R	3qF2.1
chr3	93214496	93214496	T	C	exonic	Flg2	.	synonymous SNV	Flg2:NM_001013804:exon6:c.T3972C:p.G1324G	3qF2.1
chr3	93214504	93214504	A	C	exonic	Flg2	.	nonsynonymous SNV	Flg2:NM_001013804:exon6:c.A3980C:p.Q1327P	3qF2.1
chr3	93214691	93214691	T	C	exonic	Flg2	.	synonymous SNV	Flg2:NM_001013804:exon6:c.T4167C:p.A1389A	3qF2.1
chr3	93219914	93219914	A	G	exonic	Flg2	.	synonymous SNV	Flg2:NM_001013804:exon7:c.A6126G:p.Q2042Q	3qF2.1
chr3	93322832	93322832	T	A	exonic	Hrnr	.	nonsynonymous SNV	Hrnr:NM_133698:exon3:c.T376A:p.L126I	3qF2.1
chr3	93323082	93323082	C	A	exonic	Hrnr	.	nonsynonymous SNV	Hrnr:NM_133698:exon3:c.C626A:p.P209Q	3qF2.1
chr3	93331961	93331961	A	G	exonic	Hrnr	.	nonsynonymous SNV	Hrnr:NM_133698:exon4:c.A8974G:p.S2992G	3qF2.1
chr3	93443414	93443414	A	G	exonic	Tchh	.	nonsynonymous SNV	Tchh:NM_001163098:exon2:c.A160G:p.I54V	3qF2.1
chr3	93471169	93471169	A	G	exonic	Tchhl1	.	synonymous SNV	Tchhl1:NM_027762:exon3:c.A1179G:p.S393S	3qF2.1
chr3	93471217	93471217	T	C	exonic	Tchhl1	.	synonymous SNV	Tchhl1:NM_027762:exon3:c.T1227C:p.S409S	3qF2.1
chr3	93651587	93651587	C	T	exonic	Tdpoz2	.	synonymous SNV	Tdpoz2:NM_001007222:exon1:c.G1077A:p.T359T	3qF2.1
chr3	93652008	93652008	G	T	exonic	Tdpoz2	.	nonsynonymous SNV	Tdpoz2:NM_001007222:exon1:c.C656A:p.P219H	3qF2.1
chr3	93652192	93652192	T	C	exonic	Tdpoz2	.	nonsynonymous SNV	Tdpoz2:NM_001007222:exon1:c.A472G:p.M158V	3qF2.1
chr3	93652332	93652332	G	T	exonic	Tdpoz2	.	nonsynonymous SNV	Tdpoz2:NM_001007222:exon1:c.C332A:p.P111H	3qF2.1
chr3	93652350	93652350	G	A	exonic	Tdpoz2	.	nonsynonymous SNV	Tdpoz2:NM_001007222:exon1:c.C314T:p.T105M	3qF2.1
chr3	93652478	93652478	G	A	exonic	Tdpoz2	.	synonymous SNV	Tdpoz2:NM_001007222:exon1:c.C186T:p.N62N	3qF2.1
chr3	93652558	93652558	T	C	exonic	Tdpoz2	.	nonsynonymous SNV	Tdpoz2:NM_001007222:exon1:c.A106G:p.I36V	3qF2.1
chr3	93796788	93796788	T	C	exonic	Tdpoz4	.	synonymous SNV	Tdpoz4:NM_207272:exon1:c.T391C:p.L131L	3qF2.1
chr3	93796848	93796848	G	A	exonic	Tdpoz4	.	nonsynonymous SNV	Tdpoz4:NM_207272:exon1:c.G451A:p.V151I	3qF2.1
chr3	93796923	93796923	A	G	exonic	Tdpoz4	.	nonsynonymous SNV	Tdpoz4:NM_207272:exon1:c.A526G:p.N176D	3qF2.1
chr3	93796969	93796969	C	G	exonic	Tdpoz4	.	nonsynonymous SNV	Tdpoz4:NM_207272:exon1:c.C572G:p.S191C	3qF2.1
chr3	93796976	93796976	G	T	exonic	Tdpoz4	.	nonsynonymous SNV	Tdpoz4:NM_207272:exon1:c.G579T:p.L193F	3qF2.1
chr3	93797023	93797023	G	A	exonic	Tdpoz4	.	nonsynonymous SNV	Tdpoz4:NM_207272:exon1:c.G626A:p.R209H	3qF2.1
chr3	93797135	93797135	C	T	exonic	Tdpoz4	.	synonymous SNV	Tdpoz4:NM_207272:exon1:c.C738T:p.I246I	3qF2.1
chr3	93797218	93797218	A	G	exonic	Tdpoz4	.	nonsynonymous SNV	Tdpoz4:NM_207272:exon1:c.A821G:p.D274G	3qF2.1
chr3	93797254	93797254	G	A	exonic	Tdpoz4	.	nonsynonymous SNV	Tdpoz4:NM_207272:exon1:c.G857A:p.S286N	3qF2.1
chr3	93797321	93797321	G	A	exonic	Tdpoz4	.	synonymous SNV	Tdpoz4:NM_207272:exon1:c.G924A:p.K308K	3qF2.1
chr3	93797331	93797331	C	T	exonic	Tdpoz4	.	synonymous SNV	Tdpoz4:NM_207272:exon1:c.C934T:p.L312L	3qF2.1
chr3	93797426	93797426	T	C	exonic	Tdpoz4	.	synonymous SNV	Tdpoz4:NM_207272:exon1:c.T1029C:p.F343F	3qF2.1
chr3	93797435	93797435	A	G	exonic	Tdpoz4	.	synonymous SNV	Tdpoz4:NM_207272:exon1:c.A1038G:p.L346L	3qF2.1
chr3	93797449	93797449	G	A	exonic	Tdpoz4	.	nonsynonymous SNV	Tdpoz4:NM_207272:exon1:c.G1052A:p.R351H	3qF2.1
chr3	93826024	93826024	C	T	exonic	Tdpoz3	.	nonsynonymous SNV	Tdpoz3:NM_207271:exon1:c.C5T:p.A2V	3qF2.1
chr3	93826096	93826096	T	C	exonic	Tdpoz3	.	nonsynonymous SNV	Tdpoz3:NM_207271:exon1:c.T77C:p.I26T	3qF2.1
chr3	93826165	93826165	C	T	exonic	Tdpoz3	.	nonsynonymous SNV	Tdpoz3:NM_207271:exon1:c.C146T:p.A49V	3qF2.1
chr3	93826170	93826170	A	G	exonic	Tdpoz3	.	nonsynonymous SNV	Tdpoz3:NM_207271:exon1:c.A151G:p.K51E	3qF2.1
chr3	94175593	94175593	T	C	exonic	Spopfm2	.	nonsynonymous SNV	Spopfm2:NM_001146107:exon2:c.A910G:p.T304A	3qF2.1
chr3	94175651	94175651	T	G	exonic	Spopfm2	.	synonymous SNV	Spopfm2:NM_001146107:exon2:c.A852C:p.S284S	3qF2.1
chr3	94342354	94342354	A	G	exonic	Them5	.	synonymous SNV	Them5:NM_025416:exon1:c.A96G:p.S32S	3qF2.1
chr3	94388994	94388994	G	A	exonic	Rorc	.	nonsynonymous SNV	Rorc:NM_001293734:exon4:c.G479A:p.G160D,Rorc:NM_011281:exon5:c.G542A:p.G181D	3qF2.1
chr3	94634512	94634512	T	G	exonic	Tuft1	.	synonymous SNV	Tuft1:NM_001293728:exon4:c.A285C:p.I95I,Tuft1:NM_011656:exon5:c.A360C:p.I120I	3qF2.1
chr3	94635457	94635457	A	G	exonic	Tuft1	.	synonymous SNV	Tuft1:NM_001293728:exon3:c.T201C:p.H67H,Tuft1:NM_011656:exon4:c.T276C:p.H92H	3qF2.1
chr3	94635461	94635461	G	A	exonic	Tuft1	.	nonsynonymous SNV	Tuft1:NM_001293728:exon3:c.C197T:p.T66I,Tuft1:NM_011656:exon4:c.C272T:p.T91I	3qF2.1
chr3	94635493	94635493	A	C	exonic	Tuft1	.	synonymous SNV	Tuft1:NM_001293728:exon3:c.T165G:p.V55V,Tuft1:NM_011656:exon4:c.T240G:p.V80V	3qF2.1
chr3	94639020	94639020	T	G	exonic	Tuft1	.	synonymous SNV	Tuft1:NM_001293728:exon2:c.A67C:p.R23R,Tuft1:NM_011656:exon3:c.A142C:p.R48R	3qF2.1
chr3	94762601	94762601	C	A	exonic	Cgn	.	nonsynonymous SNV	Cgn:NM_001037711:exon19:c.G3228T:p.Q1076H,Cgn:NM_001293727:exon19:c.G3204T:p.Q1068H	3qF2.1
chr3	94763046	94763046	C	G	exonic	Cgn	.	nonsynonymous SNV	Cgn:NM_001037711:exon18:c.G3097C:p.A1033P,Cgn:NM_001293727:exon18:c.G3073C:p.A1025P	3qF2.1
chr3	94763068	94763068	T	G	exonic	Cgn	.	synonymous SNV	Cgn:NM_001037711:exon18:c.A3075C:p.S1025S,Cgn:NM_001293727:exon18:c.A3051C:p.S1017S	3qF2.1
chr3	94770499	94770499	A	T	exonic	Cgn	.	synonymous SNV	Cgn:NM_001037711:exon11:c.T2064A:p.A688A,Cgn:NM_001293727:exon11:c.T2040A:p.A680A	3qF2.1
chr3	94770626	94770626	T	C	exonic	Cgn	.	nonsynonymous SNV	Cgn:NM_001037711:exon11:c.A1937G:p.Q646R,Cgn:NM_001293727:exon11:c.A1913G:p.Q638R	3qF2.1
chr3	94874661	94874661	C	G	exonic	Pogz	.	synonymous SNV	Pogz:NM_001368812:exon9:c.C1260G:p.T420T,Pogz:NM_001368811:exon10:c.C1419G:p.T473T,Pogz:NM_001165948:exon11:c.C1710G:p.T570T,Pogz:NM_172683:exon11:c.C1737G:p.T579T	3qF2.1
chr3	94877332	94877332	A	C	exonic	Pogz	.	synonymous SNV	Pogz:NM_001368812:exon13:c.A1842C:p.R614R,Pogz:NM_001368811:exon14:c.A2001C:p.R667R,Pogz:NM_001165948:exon15:c.A2292C:p.R764R,Pogz:NM_172683:exon15:c.A2319C:p.R773R	3qF2.1
chr3	94878871	94878871	C	A	exonic	Pogz	.	synonymous SNV	Pogz:NM_001368812:exon17:c.C2292A:p.S764S,Pogz:NM_001368811:exon18:c.C2451A:p.S817S,Pogz:NM_001165948:exon19:c.C2742A:p.S914S,Pogz:NM_172683:exon19:c.C2769A:p.S923S	3qF2.1
chr3	94880008	94880008	A	T	exonic	Pogz	.	synonymous SNV	Pogz:NM_001368812:exon17:c.A3429T:p.G1143G,Pogz:NM_001368811:exon18:c.A3588T:p.G1196G,Pogz:NM_001165948:exon19:c.A3879T:p.G1293G,Pogz:NM_172683:exon19:c.A3906T:p.G1302G	3qF2.1
chr3	94939785	94939785	C	T	exonic	Selenbp1	.	synonymous SNV	Selenbp1:NM_009150:exon6:c.C621T:p.P207P	3qF2.1
chr3	94959097	94959097	G	A	exonic	Rfx5	.	nonsynonymous SNV	Rfx5:NM_001355705:exon10:c.G1706A:p.R569Q,Rfx5:NM_001355706:exon10:c.G1631A:p.R544Q,Rfx5:NM_001355707:exon10:c.G1442A:p.R481Q,Rfx5:NM_017395:exon10:c.G1706A:p.R569Q	3qF2.1
chr3	95118673	95118673	C	T	exonic	Vps72	.	nonsynonymous SNV	Vps72:NM_009336:exon3:c.C295T:p.R99C	3qF2.1
[truncated: 738 more rows]
