# Supplementary material for: Novel CRISPR-Cas9 BAP1 Knockout Pre-Clinical Tumor Model Recapitulates Human Melanoma Tumorigenesis and Immune Evolution
Source: Research Square preprint supplement (doi:10.21203/rs.3.rs-6134890/v1), 2025-04-09
Supplement: Supplementary file 2 [file 218f6c6d6d4c858b757d0d13.xlsx]

## Sheet: indels_protein_coding_region
Chr	Start	End	Ref	Alt	Func.refGene	Gene.refGene	GeneDetail.refGene	ExonicFunc.refGene	AAChange.refGene	cytoBand
chr1	9546104	9546105	CT	-	exonic	Rrs1	.	frameshift deletion	Rrs1:NM_021511:exon1:c.581_582del:p.H197Qfs*18	1qA2
chr1	85610809	85610811	AGA	-	exonic	Sp140	.	nonframeshift deletion	Sp140:NM_001013817:exon3:c.266_268del:p.K91del	1qC5
chr1	87443797	87443799	CAG	-	exonic	Gigyf2	.	nonframeshift deletion	Gigyf2:NM_001110212:exon27:c.3613_3615del:p.Q1214del,Gigyf2:NM_146112:exon27:c.3631_3633del:p.Q1220del	1qD
chr1	88212372	88212372	T	-	exonic	Ugt1a1	.	frameshift deletion	Ugt1a1:NM_201645:exon1:c.371delT:p.M124Sfs*3	1qD
chr1	88216158	88216158	T	-	exonic	Ugt1a1;Ugt1a10;Ugt1a2;Ugt1a5;Ugt1a6a;Ugt1a6b;Ugt1a7c;Ugt1a8;Ugt1a9	.	frameshift deletion	Ugt1a8:NM_001378375:exon4:c.1096delT:p.F366Sfs*21,Ugt1a2:NM_013701:exon4:c.1105delT:p.F369Sfs*21,Ugt1a10:NM_201641:exon4:c.1096delT:p.F366Sfs*21,Ugt1a7c:NM_201642:exon4:c.1099delT:p.F367Sfs*21,Ugt1a5:NM_201643:exon4:c.1093delT:p.F365Sfs*21,Ugt1a9:NM_201644:exon4:c.1090delT:p.F364Sfs*21,Ugt1a1:NM_201645:exon4:c.1111delT:p.F371Sfs*21,Ugt1a6a:NM_145079:exon5:c.1099delT:p.F367Sfs*21,Ugt1a6b:NM_201410…	1qD
chr1	88216161	88216162	AT	-	exonic	Ugt1a1;Ugt1a10;Ugt1a2;Ugt1a5;Ugt1a6a;Ugt1a6b;Ugt1a7c;Ugt1a8;Ugt1a9	.	frameshift deletion	Ugt1a8:NM_001378375:exon4:c.1099_1100del:p.I367Hfs*10,Ugt1a2:NM_013701:exon4:c.1108_1109del:p.I370Hfs*10,Ugt1a10:NM_201641:exon4:c.1099_1100del:p.I367Hfs*10,Ugt1a7c:NM_201642:exon4:c.1102_1103del:p.I368Hfs*10,Ugt1a5:NM_201643:exon4:c.1096_1097del:p.I366Hfs*10,Ugt1a9:NM_201644:exon4:c.1093_1094del:p.I365Hfs*10,Ugt1a1:NM_201645:exon4:c.1114_1115del:p.I372Hfs*10,Ugt1a6a:NM_145079:exon5:c.1102_1103de…	1qD
chr1	88232258	88232259	CC	-	exonic	Mroh2a	.	frameshift deletion	Mroh2a:NM_001281466:exon6:c.571_572del:p.P191Lfs*27	1qD
chr1	88237911	88237921	GATACTGTAAA	-	exonic	Mroh2a	.	frameshift deletion	Mroh2a:NM_001281466:exon14:c.1501_1511del:p.T502Hfs*11	1qD
chr1	88256166	88256166	-	T	exonic	Mroh2a	.	frameshift insertion	Mroh2a:NM_001281466:exon35:c.4100dupT:p.E1368Rfs*31	1qD
chr1	88266279	88266329	CTGGGAGGGCTTGCTCCGGGGGCAGTGTGTCCTGTTCTTGTGCAGCCCCTG	-	exonic	A730008H23Rik;Hjurp	.	nonframeshift deletion	A730008H23Rik:NM_172505:exon5:c.628_678del:p.Q210_Q226del,Hjurp:NM_198652:exon8:c.856_906del:p.Q286_Q302del	1qD
chr1	88266524	88266524	-	T	exonic	A730008H23Rik;Hjurp	.	frameshift insertion	A730008H23Rik:NM_172505:exon5:c.432dupA:p.L145Tfs*14,Hjurp:NM_198652:exon8:c.660dupA:p.L221Tfs*14	1qD
chr1	171356617	171356702	AGGTAGGAAGGCCGCAGAGAAACAGAGTGATTGGATGGAGGCTTGTGGGGATCAGGACGCATTCTGAGGTCTTGTTCTCCTACCCT	-	exonic	Pfdn2	.	frameshift deletion	Pfdn2:NM_001360824:exon2:c.163_164del:p.S55Pfs*11,Pfdn2:NM_001360825:exon2:c.19_20del:p.S7Pfs*11,Pfdn2:NM_011070:exon2:c.163_164del:p.S55Pfs*11	1qH3
chr11	53332480	53332482	TCC	-	exonic	Zcchc10	.	nonframeshift deletion	Zcchc10:NM_026479:exon4:c.424_426del:p.S147del	11qB1.3
chr11	100464142	100464143	TC	-	exonic	Klhl11	.	frameshift deletion	Klhl11:NM_172565:exon2:c.851_852del:p.R284Ifs*3	11qD
chr11	103360175	103360175	A	-	exonic	Arhgap27	.	frameshift deletion	Arhgap27:NM_183288:exon3:c.726delT:p.F242Lfs*24	11qE1
chr14	44717786	44717786	-	A	exonic	Gm8267	.	frameshift insertion	Gm8267:NM_001162954:exon4:c.594dupT:p.L199Sfs*5	14qC1
chr14	69767721	69767722	CC	-	exonic	Tnfrsf10b	.	frameshift deletion	Tnfrsf10b:NM_020275:exon1:c.62_63del:p.P22Rfs*13	14qD2
chr16	32753994	32754166	TCATGAGCAGCTCAGCTCCAAGTACAACACACATGTTATCCACAACATCCTCCACTCAAAGTACCTCAGTAGACACAAGACACACAACAGCAGGAAGGACTCAAGGTTCTACACCTGCCACCACACAGGTCTCACCTTCCTCCCAGAACATGACAACCACCTCACATGCTCCC	-	exonic	Muc4	.	nonframeshift deletion	Muc4:NM_080457:exon3:c.3869_4039del:p.A1320_T1376del	16qB3
chr16	32755752	32755752	-	GG	exonic	Muc4	.	frameshift insertion	Muc4:NM_080457:exon4:c.5625_5626insGG:p.I1876Gfs*2	16qB3
chr16	32755754	32755754	T	-	exonic	Muc4	.	frameshift deletion	Muc4:NM_080457:exon4:c.5627delT:p.I1876Kfs*2	16qB3
chr16	32755757	32755757	T	-	exonic	Muc4	.	frameshift deletion	Muc4:NM_080457:exon4:c.5630delT:p.V1877Gfs*14	16qB3
chr16	98010822	98010823	AA	-	exonic	B230307C23Rik	.	frameshift deletion	B230307C23Rik:NM_001362093:exon4:c.895_896del:p.K299Afs*3	16qC4
chr17	23291068	23291070	AGA	-	exonic	Vmn2r114	.	nonframeshift deletion	Vmn2r114:NM_001102584:exon6:c.2435_2437del:p.F812del	17qA3.3
chr17	23311107	23311107	C	-	exonic	Vmn2r114	.	frameshift deletion	Vmn2r114:NM_001102584:exon2:c.325delG:p.E109Nfs*4	17qA3.3
chr17	23311191	23311191	A	-	exonic	Vmn2r114	.	frameshift deletion	Vmn2r114:NM_001102584:exon2:c.241delT:p.S81Pfs*17	17qA3.3
chr17	23345092	23345092	T	-	exonic	Vmn2r115	.	frameshift deletion	Vmn2r115:NM_001104579:exon2:c.237delT:p.S81Pfs*7	17qA3.3
chr17	23359989	23359991	TCT	-	exonic	Vmn2r115	.	nonframeshift deletion	Vmn2r115:NM_001104579:exon6:c.2435_2437del:p.F813del	17qA3.3
chr17	23360127	23360127	A	-	exonic	Vmn2r115	.	stoploss	Vmn2r115:NM_001104579:exon6:c.2573delA:p.*858del	17qA3.3
chr17	23477501	23477501	C	-	exonic	Vmn2r117	.	frameshift deletion	Vmn2r117:NM_001104581:exon3:c.931delG:p.D311Tfs*30	17qA3.3
chr17	23477728	23477728	T	-	exonic	Vmn2r117	.	frameshift deletion	Vmn2r117:NM_001104581:exon3:c.704delA:p.N235Ifs*10	17qA3.3
chr17	23477744	23477745	TT	-	exonic	Vmn2r117	.	frameshift deletion	Vmn2r117:NM_001104581:exon3:c.687_688del:p.E231Dfs*26	17qA3.3
chr17	23479466	23479466	G	-	exonic	Vmn2r117	.	frameshift deletion	Vmn2r117:NM_001104581:exon1:c.132delC:p.F45Sfs*2	17qA3.3
chr17	23479514	23479514	C	-	exonic	Vmn2r117	.	stopgain	Vmn2r117:NM_001104581:exon1:c.84delG:p.I29*	17qA3.3
chr17	36040499	36040501	CAG	-	exonic	H2-T22;H2-T9	.	nonframeshift deletion	H2-T22:NM_001359754:exon4:c.662_664del:p.P221_E222delinsQ,H2-T22:NM_001359756:exon4:c.836_838del:p.P279_E280delinsQ,H2-T22:NM_010397:exon4:c.836_838del:p.P279_E280delinsQ,H2-T22:NM_001347382:exon5:c.836_838del:p.P279_E280delinsQ,H2-T22:NM_001359755:exon5:c.836_838del:p.P279_E280delinsQ,H2-T9:NM_010399:exon5:c.836_838del:p.P279_E280delinsQ	17qB1
chr17	36040503	36040503	-	CTG	exonic	H2-T22;H2-T9	.	nonframeshift insertion	H2-T22:NM_001359754:exon4:c.659_660insCAG:p.L220_P221insR,H2-T22:NM_001359756:exon4:c.833_834insCAG:p.L278_P279insR,H2-T22:NM_010397:exon4:c.833_834insCAG:p.L278_P279insR,H2-T22:NM_001347382:exon5:c.833_834insCAG:p.L278_P279insR,H2-T22:NM_001359755:exon5:c.833_834insCAG:p.L278_P279insR,H2-T9:NM_010399:exon5:c.833_834insCAG:p.L278_P279insR	17qB1
chr18	12751146	12751146	T	-	exonic	Cabyr	.	frameshift deletion	Cabyr:NM_001042418:exon4:c.689delT:p.V230Efs*6,Cabyr:NM_001042420:exon4:c.689delT:p.V230Efs*6,Cabyr:NM_027687:exon4:c.689delT:p.V230Efs*6	18qA1
chr18	56749741	56749743	GAG	-	exonic	Lmnb1	.	nonframeshift deletion	Lmnb1:NM_010721:exon10:c.1657_1659del:p.E561del	18qD3
chr19	38938432	38938432	-	A	exonic	Hells	.	frameshift insertion	Hells:NM_008234:exon4:c.256dupA:p.R89Tfs*9	19qC3
chr19	46083156	46083158	AGC	-	exonic	Nolc1	.	nonframeshift deletion	Nolc1:NM_001039351:exon10:c.1537_1539del:p.S522del,Nolc1:NM_001039352:exon10:c.1543_1545del:p.S524del,Nolc1:NM_001039353:exon10:c.1540_1542del:p.S523del,Nolc1:NM_053086:exon10:c.1540_1542del:p.S523del	19qC3
chr19	56433273	56433273	G	-	exonic	Casp7	.	frameshift deletion	Casp7:NM_007611:exon3:c.142delG:p.V48Sfs*26	19qD2
chr1_GL456212_random	139039	139039	-	TAC	exonic	LOC102638047	.	nonframeshift insertion	LOC102638047:NM_001378739:exon5:c.714_715insGTA:p.V238_P239insV,LOC102638047:NM_001378740:exon5:c.714_715insGTA:p.V238_P239insV	.
chr2	25434313	25434314	TG	-	exonic	Abca2	.	frameshift deletion	Abca2:NM_001368624:exon7:c.683_684del:p.L228Pfs*27,Abca2:NM_007379:exon7:c.680_681del:p.L227Pfs*27	2qA3
chr2	25434320	25434320	-	CA	exonic	Abca2	.	frameshift insertion	Abca2:NM_001368624:exon7:c.690_691insCA:p.A231Qfs*30,Abca2:NM_007379:exon7:c.687_688insCA:p.A230Qfs*30	2qA3
chr2	27975590	27975590	A	-	exonic	Col5a1	.	frameshift deletion	Col5a1:NM_015734:exon25:c.2268delA:p.G757Afs*47	2qA3
chr2	112669250	112669252	TCT	-	exonic	Ryr3	.	nonframeshift deletion	Ryr3:NM_001319156:exon78:c.10788_10790del:p.E3596del	2qE3
chr3	103928778	103928778	G	-	exonic	Rsbn1	.	frameshift deletion	Rsbn1:NM_001356556:exon2:c.1131delG:p.D378Tfs*21,Rsbn1:NM_001356557:exon2:c.1125delG:p.D376Tfs*21,Rsbn1:NM_001356558:exon2:c.1131delG:p.D378Tfs*21,Rsbn1:NM_172684:exon2:c.1131delG:p.D378Tfs*21	3qF2.2
chr4	63171423	63171423	-	GGGCCTCCACCCGGC	exonic	Kif12	.	nonframeshift insertion	Kif12:NM_001317352:exon4:c.179_180insGCCGGGTGGAGGCCC:p.P60_D61insPGGGP,Kif12:NM_010616:exon4:c.179_180insGCCGGGTGGAGGCCC:p.P60_D61insPGGGP	4qB3
chr4	126165423	126165427	CTTCT	-	exonic	Thrap3	.	frameshift deletion	Thrap3:NM_146153:exon11:c.2825_2829del:p.E942Gfs*8,Thrap3:NM_001356455:exon12:c.2825_2829del:p.E942Gfs*8,Thrap3:NM_001356456:exon12:c.2825_2829del:p.E942Gfs*8	4qD2.2
chr4	126165497	126165497	C	-	exonic	Thrap3	.	frameshift deletion	Thrap3:NM_146153:exon11:c.2755delG:p.A919Pfs*12,Thrap3:NM_001356455:exon12:c.2755delG:p.A919Pfs*12,Thrap3:NM_001356456:exon12:c.2755delG:p.A919Pfs*12	4qD2.2
chr4	126165568	126165568	C	-	exonic	Thrap3	.	frameshift deletion	Thrap3:NM_146153:exon11:c.2684delG:p.R895Qfs*36,Thrap3:NM_001356455:exon12:c.2684delG:p.R895Qfs*36,Thrap3:NM_001356456:exon12:c.2684delG:p.R895Qfs*36	4qD2.2
chr4	140934693	140934693	C	-	exonic	Padi2	.	stopgain	Padi2:NM_008812:exon10:c.1152delC:p.L385*	4qD3
chr4	146537803	146537803	-	AA	exonic	Zfp981	.	frameshift insertion	Zfp981:NM_001243139:exon4:c.1184_1185insAA:p.V396Kfs*84,Zfp981:NM_001243138:exon5:c.1184_1185insAA:p.V396Kfs*84	4qE1
chr4	146537806	146537807	TT	-	exonic	Zfp981	.	frameshift deletion	Zfp981:NM_001243139:exon4:c.1187_1188del:p.V396Afs*15,Zfp981:NM_001243138:exon5:c.1187_1188del:p.V396Afs*15	4qE1
chr4	147391306	147391307	AA	-	exonic	Zfp978	.	frameshift deletion	Zfp978:NM_001378742:exon5:c.1309_1310del:p.K437Rfs*8	4qE1
chr4	147584193	147584194	TT	-	exonic	Zfp985	.	frameshift deletion	Zfp985:NM_001014397:exon6:c.1517_1518del:p.I506Kfs*18	4qE1
chr4	147584198	147584198	C	-	exonic	Zfp985	.	frameshift deletion	Zfp985:NM_001014397:exon6:c.1522delC:p.H508Ifs*26	4qE1
chr4	147674482	147674483	TG	-	exonic	Zfp534	.	stopgain	Zfp534:NM_001127188:exon4:c.1728_1729del:p.Y576*	4qE1
chr4	147674486	147674567	AGGTCTCTCTCCTGTATGAATTCTCTGATGAATTTTCAGACTGTTTTTTTCATTAAAGCATTTTTCACATTCACTGCATTTG	-	exonic	Zfp534	.	frameshift deletion	Zfp534:NM_001127188:exon4:c.1644_1725del:p.K549Tfs*44	4qE1
chr4	147674646	147674729	CATTTGTAAGGTTTCTCTCCTGTATGAATTCTCTGATGAATTCTCAGACTGCTTTTTTCAGTAAAGCATTTGCCACATTCACTA	-	exonic	Zfp534	.	nonframeshift deletion	Zfp534:NM_001127188:exon4:c.1482_1565del:p.G498_C525del	4qE1
chr4	147754930	147755013	TTCTCTCCTGTATGAATTCTCTGATGAATATTAAGATTGGATTTTTGGGTAAAGCATTTGTCACATTCACTGCATTTGTAAGGG	-	exonic	Zfp984	.	nonframeshift deletion	Zfp984:NM_001127189:exon6:c.1380_1463del:p.N460_E487del	4qE1
chr4_GL456216_random	34238	34238	C	-	exonic	Dhrsx	.	frameshift deletion	Dhrsx:NM_001368261:exon4:c.387delC:p.A131Pfs*69,Dhrsx:NM_001368262:exon4:c.381delC:p.A129Pfs*69,Dhrsx:NM_001033326:exon5:c.489delC:p.A165Pfs*69	.
chr4_JH584292_random	11356	11356	G	-	exonic	Vmn2r122	.	frameshift deletion	Vmn2r122:NM_009488:exon5:c.2184delG:p.G729Vfs*46,Vmn2r122:NM_009492:exon5:c.2289delG:p.G764Vfs*46,Vmn2r122:NM_001385246:exon6:c.2412delG:p.G805Vfs*46,Vmn2r122:NM_001385247:exon6:c.2409delG:p.G804Vfs*46	.
chr5	25950853	25950855	CTT	-	exonic	Gm21671	.	nonframeshift deletion	Gm21671:NM_001281516:exon4:c.490_492del:p.K164del	5qB1
chr5	26001227	26001229	CTT	-	exonic	Gm1979	.	nonframeshift deletion	Gm1979:NM_001281519:exon4:c.490_492del:p.K164del	5qB1
chr5	124624334	124624334	-	AC	exonic	Tctn2	.	unknown	UNKNOWN	5qF
chr5	137152812	137152812	-	CG	exonic	Muc3	.	frameshift insertion	Muc3:NM_010843:exon3:c.588_589insCG:p.T197Rfs*11	5qG2
chr6	4756452	4756452	-	CACATCAGGATCCCCATCAGGATCCCCATCAGGATGCACATCAGGATCCACATCAGCATCCGGATCCCCATCAGGATCCTC	exonic	Peg10	.	unknown	UNKNOWN	6qA1
chr6	23410016	23410016	A	-	exonic	Cadps2	.	frameshift deletion	Cadps2:NM_001252107:exon14:c.2216delT:p.F739Sfs*7	6qA3.1
chr6	149511789	149511789	T	-	exonic	Bicd1	.	frameshift deletion	Bicd1:NM_001112796:exon4:c.677delT:p.I226Mfs*13,Bicd1:NM_009753:exon4:c.677delT:p.I226Mfs*13	6qG3
chr7	43463551	43463551	-	CA	exonic	Vsig10l	.	frameshift insertion	Vsig10l:NM_001368881:exon2:c.232_233insCA:p.S79Qfs*38	7qB3
chr7	130622519	130622519	G	-	exonic	Tacc2	.	frameshift deletion	Tacc2:NM_001004468:exon3:c.933delG:p.E312Kfs*67	7qF3
chr7	141638851	141638856	GTGTGG	-	exonic	Muc6	.	nonframeshift deletion	Muc6:NM_001368953:exon31:c.5588_5593del:p.P1863_T1864del	7qF5
chr7	141638859	141639059	GTCACTGTGGAAGGTTGCGAGAGATGGGGTGCAGAGGTCCTGTCTGTGGAGAACGAGCTTTTGGTTTGTGTGGCAGCAGTGGTTGTATACGTGACAGGTACTGATGTATGAGGTGGTCTTGTGCCTTCCAGGGTGGTTGGAAGGACAGTCATCAGTGGCATGGAGGTAGAGGCCACTGATAGGGAGTGTGGGCTGGTTGGG	-	exonic	Muc6	.	nonframeshift deletion	Muc6:NM_001368953:exon31:c.5385_5585del:p.S1798_T1864del	7qF5
chr8	26160824	26160824	A	-	exonic	Thap1	.	frameshift deletion	Thap1:NM_199042:exon2:c.121delA:p.R42Gfs*31	8qA2
chr8	26160857	26160858	AG	-	exonic	Thap1	.	frameshift deletion	Thap1:NM_199042:exon2:c.154_155del:p.S52Hfs*12	8qA2
chr8	26160860	26160870	ATCTGCTCGGA	-	exonic	Thap1	.	frameshift deletion	Thap1:NM_199042:exon2:c.157_167del:p.I53Afs*8	8qA2
chr8	26160970	26160970	-	AAGGAAGACCTGGAATCCCAAGAACAGCTTCCCTCTGCTTCACCCCCCT	exonic	Thap1	.	stopgain	Thap1:NM_199042:exon2:c.267_268insAAGGAAGACCTGGAATCCCAAGAACAGCTTCCCTCTGCTTCACCCCCCT:p.P102Afs*5	8qA2
chr8	26162481	26162481	-	T	exonic	Thap1	.	frameshift insertion	Thap1:NM_199042:exon3:c.315_316insT:p.A106Cfs*5	8qA2
chr8	26162604	26162604	C	-	exonic	Thap1	.	frameshift deletion	Thap1:NM_199042:exon3:c.438delC:p.L147Cfs*50	8qA2
chr8	26162687	26162687	-	TGAAAAGCTCAAGACTGCCCAGCAG	exonic	Thap1	.	frameshift insertion	Thap1:NM_199042:exon3:c.521_522insTGAAAAGCTCAAGACTGCCCAGCAG:p.E179Tfs*31	8qA2
chr8	26162689	26162689	-	GTGCCGGC	exonic	Thap1	.	frameshift insertion	Thap1:NM_199042:exon3:c.523_524insGTGCCGGC:p.E175Gfs*25	8qA2
chr8	26162691	26162691	-	CAGGAGAGGCAGCTTGAA	exonic	Thap1	.	nonframeshift insertion	Thap1:NM_199042:exon3:c.525_526insCAGGAGAGGCAGCTTGAA:p.E175_K176insQERQLE	8qA2
chr8	104182034	104182034	C	-	exonic	Bean1	.	frameshift deletion	Bean1:NM_001141922:exon3:c.42delC:p.Q15Kfs*29	8qD3
chr8	122383858	122383860	GAG	-	exonic	Zc3h18	.	nonframeshift deletion	Zc3h18:NM_001029993:exon2:c.445_447del:p.E153del,Zc3h18:NM_001029994:exon2:c.445_447del:p.E153del,Zc3h18:NM_001310650:exon2:c.445_447del:p.E153del	8qE1
chr9	7465083	7465083	-	G	exonic	Mmp1a	.	unknown	UNKNOWN	9qA1
chr9	39484333	39484333	T	-	exonic	Olfr44	.	stopgain	Olfr44:NM_146830:exon2:c.919delA:p.I307*	9qA5.1
chr9	59603532	59603532	C	-	exonic	Celf6	.	frameshift deletion	Celf6:NM_001311092:exon7:c.620delC:p.Q209Rfs*112,Celf6:NM_001361099:exon7:c.620delC:p.Q209Rfs*113,Celf6:NM_175235:exon8:c.965delC:p.Q324Rfs*113	9qB
chr9	65280131	65280131	G	-	exonic	Cilp	.	frameshift deletion	Cilp:NM_173385:exon10:c.3507delG:p.G1170Afs*16,Cilp:NM_001364527:exon11:c.3210delG:p.G1071Afs*16	9qC
chrX	53690895	53690895	-	C	exonic	4933416I08Rik	.	unknown	UNKNOWN	XqA5

## Sheet: snps_protein_coding_region
Chr	Start	End	Ref	Alt	Func.refGene	Gene.refGene	GeneDetail.refGene	ExonicFunc.refGene	AAChange.refGene	cytoBand
chr1	9545577	9545577	G	A	exonic	Rrs1	.	synonymous SNV	Rrs1:NM_021511:exon1:c.G54A:p.A18A	1qA2
chr1	9545597	9545597	C	T	exonic	Rrs1	.	nonsynonymous SNV	Rrs1:NM_021511:exon1:c.C74T:p.T25M	1qA2
chr1	9545621	9545621	A	T	exonic	Rrs1	.	nonsynonymous SNV	Rrs1:NM_021511:exon1:c.A98T:p.E33V	1qA2
chr1	9545654	9545654	G	A	exonic	Rrs1	.	nonsynonymous SNV	Rrs1:NM_021511:exon1:c.G131A:p.R44H	1qA2
chr1	9545663	9545663	C	T	exonic	Rrs1	.	nonsynonymous SNV	Rrs1:NM_021511:exon1:c.C140T:p.P47L	1qA2
chr1	9545666	9545666	C	T	exonic	Rrs1	.	nonsynonymous SNV	Rrs1:NM_021511:exon1:c.C143T:p.T48I	1qA2
chr1	9545668	9545668	G	A	exonic	Rrs1	.	nonsynonymous SNV	Rrs1:NM_021511:exon1:c.G145A:p.V49M	1qA2
chr1	9545674	9545674	C	T	exonic	Rrs1	.	nonsynonymous SNV	Rrs1:NM_021511:exon1:c.C151T:p.R51C	1qA2
chr1	9545682	9545682	C	T	exonic	Rrs1	.	synonymous SNV	Rrs1:NM_021511:exon1:c.C159T:p.A53A	1qA2
chr1	9545684	9545684	G	T	exonic	Rrs1	.	nonsynonymous SNV	Rrs1:NM_021511:exon1:c.G161T:p.G54V	1qA2
chr1	9545685	9545685	G	T	exonic	Rrs1	.	synonymous SNV	Rrs1:NM_021511:exon1:c.G162T:p.G54G	1qA2
chr1	9545688	9545688	G	T	exonic	Rrs1	.	synonymous SNV	Rrs1:NM_021511:exon1:c.G165T:p.P55P	1qA2
chr1	9545691	9545691	G	A	exonic	Rrs1	.	synonymous SNV	Rrs1:NM_021511:exon1:c.G168A:p.S56S	1qA2
chr1	9545693	9545693	C	T	exonic	Rrs1	.	nonsynonymous SNV	Rrs1:NM_021511:exon1:c.C170T:p.P57L	1qA2
chr1	9545700	9545700	C	G	exonic	Rrs1	.	synonymous SNV	Rrs1:NM_021511:exon1:c.C177G:p.A59A	1qA2
chr1	9545762	9545762	C	A	exonic	Rrs1	.	nonsynonymous SNV	Rrs1:NM_021511:exon1:c.C239A:p.P80Q	1qA2
chr1	9545767	9545767	G	A	exonic	Rrs1	.	nonsynonymous SNV	Rrs1:NM_021511:exon1:c.G244A:p.E82K	1qA2
chr1	9545801	9545801	C	A	exonic	Rrs1	.	nonsynonymous SNV	Rrs1:NM_021511:exon1:c.C278A:p.P93Q	1qA2
chr1	9545808	9545808	C	G	exonic	Rrs1	.	synonymous SNV	Rrs1:NM_021511:exon1:c.C285G:p.P95P	1qA2
chr1	9545840	9545840	C	A	exonic	Rrs1	.	nonsynonymous SNV	Rrs1:NM_021511:exon1:c.C317A:p.P106H	1qA2
chr1	9545848	9545848	C	A	exonic	Rrs1	.	synonymous SNV	Rrs1:NM_021511:exon1:c.C325A:p.R109R	1qA2
chr1	9545860	9545860	C	A	exonic	Rrs1	.	nonsynonymous SNV	Rrs1:NM_021511:exon1:c.C337A:p.R113S	1qA2
chr1	9545875	9545875	G	C	exonic	Rrs1	.	nonsynonymous SNV	Rrs1:NM_021511:exon1:c.G352C:p.A118P	1qA2
chr1	9545876	9545876	C	T	exonic	Rrs1	.	nonsynonymous SNV	Rrs1:NM_021511:exon1:c.C353T:p.A118V	1qA2
chr1	9545894	9545894	G	T	exonic	Rrs1	.	nonsynonymous SNV	Rrs1:NM_021511:exon1:c.G371T:p.R124L	1qA2
chr1	9545925	9545925	C	A	exonic	Rrs1	.	nonsynonymous SNV	Rrs1:NM_021511:exon1:c.C402A:p.D134E	1qA2
chr1	9545944	9545944	C	A	exonic	Rrs1	.	synonymous SNV	Rrs1:NM_021511:exon1:c.C421A:p.R141R	1qA2
chr1	9545951	9545951	G	T	exonic	Rrs1	.	nonsynonymous SNV	Rrs1:NM_021511:exon1:c.G428T:p.R143L	1qA2
chr1	9545985	9545985	A	G	exonic	Rrs1	.	synonymous SNV	Rrs1:NM_021511:exon1:c.A462G:p.K154K	1qA2
chr1	9545992	9545992	C	G	exonic	Rrs1	.	nonsynonymous SNV	Rrs1:NM_021511:exon1:c.C469G:p.L157V	1qA2
chr1	9546138	9546138	C	A	exonic	Rrs1	.	synonymous SNV	Rrs1:NM_021511:exon1:c.C615A:p.A205A	1qA2
chr1	9546150	9546150	T	C	exonic	Rrs1	.	synonymous SNV	Rrs1:NM_021511:exon1:c.T627C:p.P209P	1qA2
chr1	9546153	9546153	T	G	exonic	Rrs1	.	synonymous SNV	Rrs1:NM_021511:exon1:c.T630G:p.T210T	1qA2
chr1	9546171	9546171	A	G	exonic	Rrs1	.	synonymous SNV	Rrs1:NM_021511:exon1:c.A648G:p.E216E	1qA2
chr1	9546180	9546180	C	T	exonic	Rrs1	.	synonymous SNV	Rrs1:NM_021511:exon1:c.C657T:p.G219G	1qA2
chr1	9546215	9546215	C	T	exonic	Rrs1	.	nonsynonymous SNV	Rrs1:NM_021511:exon1:c.C692T:p.S231L	1qA2
chr1	9546223	9546223	C	T	exonic	Rrs1	.	nonsynonymous SNV	Rrs1:NM_021511:exon1:c.C700T:p.R234C	1qA2
chr1	9546259	9546259	C	T	exonic	Rrs1	.	nonsynonymous SNV	Rrs1:NM_021511:exon1:c.C736T:p.R246W	1qA2
chr1	9546268	9546268	G	T	exonic	Rrs1	.	nonsynonymous SNV	Rrs1:NM_021511:exon1:c.G745T:p.G249C	1qA2
chr1	9546313	9546313	G	A	exonic	Rrs1	.	nonsynonymous SNV	Rrs1:NM_021511:exon1:c.G790A:p.E264K	1qA2
chr1	9546338	9546338	T	A	exonic	Rrs1	.	nonsynonymous SNV	Rrs1:NM_021511:exon1:c.T815A:p.L272H	1qA2
chr1	9546341	9546341	G	T	exonic	Rrs1	.	nonsynonymous SNV	Rrs1:NM_021511:exon1:c.G818T:p.R273L	1qA2
chr1	9546372	9546372	C	T	exonic	Rrs1	.	synonymous SNV	Rrs1:NM_021511:exon1:c.C849T:p.D283D	1qA2
chr1	9546377	9546377	C	T	exonic	Rrs1	.	nonsynonymous SNV	Rrs1:NM_021511:exon1:c.C854T:p.T285M	1qA2
chr1	9546414	9546414	G	A	exonic	Rrs1	.	synonymous SNV	Rrs1:NM_021511:exon1:c.G891A:p.Q297Q	1qA2
chr1	9546452	9546452	G	A	exonic	Rrs1	.	nonsynonymous SNV	Rrs1:NM_021511:exon1:c.G929A:p.G310D	1qA2
chr1	9546478	9546478	C	T	exonic	Rrs1	.	nonsynonymous SNV	Rrs1:NM_021511:exon1:c.C955T:p.P319S	1qA2
chr1	9546504	9546504	G	C	exonic	Rrs1	.	synonymous SNV	Rrs1:NM_021511:exon1:c.G981C:p.P327P	1qA2
chr1	9546533	9546533	G	A	exonic	Rrs1	.	nonsynonymous SNV	Rrs1:NM_021511:exon1:c.G1010A:p.G337D	1qA2
chr1	12839899	12839899	G	A	exonic	Sulf1	.	nonsynonymous SNV	Sulf1:NM_001198566:exon14:c.G1918A:p.D640N,Sulf1:NM_001198565:exon15:c.G1918A:p.D640N,Sulf1:NM_172294:exon15:c.G1918A:p.D640N	1qA3
chr1	26687267	26687267	G	A	exonic	4931408C20Rik	.	nonsynonymous SNV	4931408C20Rik:NM_001033764:exon1:c.C160T:p.P54S	1qA5
chr1	26687325	26687325	A	T	exonic	4931408C20Rik	.	synonymous SNV	4931408C20Rik:NM_001033764:exon1:c.T102A:p.G34G	1qA5
chr1	26687400	26687400	A	T	exonic	4931408C20Rik	.	nonsynonymous SNV	4931408C20Rik:NM_001033764:exon1:c.T27A:p.N9K	1qA5
chr1	59007042	59007042	T	C	exonic	C2cd6	.	nonsynonymous SNV	C2cd6:NM_026600:exon18:c.A2609G:p.K870R	1qC1.3
chr1	59007046	59007046	C	T	exonic	C2cd6	.	nonsynonymous SNV	C2cd6:NM_026600:exon18:c.G2605A:p.A869T	1qC1.3
chr1	59007048	59007048	A	G	exonic	C2cd6	.	nonsynonymous SNV	C2cd6:NM_026600:exon18:c.T2603C:p.L868S	1qC1.3
chr1	59007050	59007050	A	G	exonic	C2cd6	.	synonymous SNV	C2cd6:NM_026600:exon18:c.T2601C:p.V867V	1qC1.3
chr1	59007052	59007052	C	T	exonic	C2cd6	.	nonsynonymous SNV	C2cd6:NM_026600:exon18:c.G2599A:p.V867I	1qC1.3
chr1	59007055	59007055	A	T	exonic	C2cd6	.	nonsynonymous SNV	C2cd6:NM_026600:exon18:c.T2596A:p.F866I	1qC1.3
chr1	59007056	59007056	G	A	exonic	C2cd6	.	synonymous SNV	C2cd6:NM_026600:exon18:c.C2595T:p.S865S	1qC1.3
chr1	59007066	59007066	C	T	exonic	C2cd6	.	nonsynonymous SNV	C2cd6:NM_026600:exon18:c.G2585A:p.R862H	1qC1.3
chr1	59007067	59007067	G	A	exonic	C2cd6	.	nonsynonymous SNV	C2cd6:NM_026600:exon18:c.C2584T:p.R862C	1qC1.3
chr1	59007071	59007071	T	A	exonic	C2cd6	.	nonsynonymous SNV	C2cd6:NM_026600:exon18:c.A2580T:p.L860F	1qC1.3
chr1	59007073	59007073	A	G	exonic	C2cd6	.	synonymous SNV	C2cd6:NM_026600:exon18:c.T2578C:p.L860L	1qC1.3
chr1	75486756	75486756	G	A	exonic	Obsl1	.	nonsynonymous SNV	Obsl1:NM_178884:exon19:c.C5291T:p.T1764M	1qC4
chr1	85089575	85089575	C	G	exonic	A530032D15Rik	.	synonymous SNV	A530032D15Rik:NM_213615:exon6:c.G549C:p.V183V	1qC5
chr1	85099521	85099521	A	G	exonic	A530032D15Rik	.	nonsynonymous SNV	A530032D15Rik:NM_213615:exon3:c.T323C:p.V108A	1qC5
chr1	85247114	85247114	T	C	exonic	C130026I21Rik	.	synonymous SNV	C130026I21Rik:NM_001037909:exon7:c.A615G:p.G205G,C130026I21Rik:NM_175219:exon8:c.A699G:p.G233G	1qC5
chr1	85247125	85247125	G	C	exonic	C130026I21Rik	.	nonsynonymous SNV	C130026I21Rik:NM_001037909:exon7:c.C604G:p.P202A,C130026I21Rik:NM_175219:exon8:c.C688G:p.P230A	1qC5
chr1	85247131	85247131	G	C	exonic	C130026I21Rik	.	nonsynonymous SNV	C130026I21Rik:NM_001037909:exon7:c.C598G:p.P200A,C130026I21Rik:NM_175219:exon8:c.C682G:p.P228A	1qC5
chr1	85579079	85579079	T	G	exonic	Sp110	.	nonsynonymous SNV	Sp110:NM_030194:exon11:c.A1262C:p.E421A,Sp110:NM_175397:exon12:c.A1262C:p.E421A	1qC5
chr1	85579092	85579092	G	A	exonic	Sp110	.	nonsynonymous SNV	Sp110:NM_030194:exon11:c.C1249T:p.R417C,Sp110:NM_175397:exon12:c.C1249T:p.R417C	1qC5
chr1	85586280	85586280	C	T	exonic	Sp110	.	nonsynonymous SNV	Sp110:NM_030194:exon7:c.G755A:p.R252H,Sp110:NM_175397:exon8:c.G755A:p.R252H	1qC5
chr1	85586282	85586282	T	C	exonic	Sp110	.	synonymous SNV	Sp110:NM_030194:exon7:c.A753G:p.K251K,Sp110:NM_175397:exon8:c.A753G:p.K251K	1qC5
chr1	85589148	85589148	T	A	exonic	Sp110	.	synonymous SNV	Sp110:NM_030194:exon5:c.A627T:p.R209R,Sp110:NM_175397:exon6:c.A627T:p.R209R	1qC5
chr1	85615204	85615204	T	C	exonic	Sp140	.	synonymous SNV	Sp140:NM_001013817:exon5:c.T435C:p.C145C	1qC5
chr1	85615212	85615212	C	G	exonic	Sp140	.	nonsynonymous SNV	Sp140:NM_001013817:exon5:c.C443G:p.T148R	1qC5
chr1	85630551	85630551	A	T	exonic	Sp140	.	nonsynonymous SNV	Sp140:NM_001013817:exon9:c.A816T:p.E272D	1qC5
chr1	85643220	85643220	G	A	exonic	Sp140	.	synonymous SNV	Sp140:NM_001013817:exon16:c.G1380A:p.V460V	1qC5
chr1	85643221	85643221	A	G	exonic	Sp140	.	nonsynonymous SNV	Sp140:NM_001013817:exon16:c.A1381G:p.S461G	1qC5
chr1	88212021	88212021	G	A	exonic	Ugt1a1	.	nonsynonymous SNV	Ugt1a1:NM_201645:exon1:c.G20A:p.S7N	1qD
chr1	88212084	88212084	A	T	exonic	Ugt1a1	.	nonsynonymous SNV	Ugt1a1:NM_201645:exon1:c.A83T:p.H28L	1qD
chr1	88212093	88212093	G	A	exonic	Ugt1a1	.	nonsynonymous SNV	Ugt1a1:NM_201645:exon1:c.G92A:p.R31K	1qD
chr1	88212136	88212136	G	A	exonic	Ugt1a1	.	nonsynonymous SNV	Ugt1a1:NM_201645:exon1:c.G135A:p.M45I	1qD
chr1	88212141	88212141	G	T	exonic	Ugt1a1	.	nonsynonymous SNV	Ugt1a1:NM_201645:exon1:c.G140T:p.G47V	1qD
chr1	88212244	88212244	C	T	exonic	Ugt1a1	.	synonymous SNV	Ugt1a1:NM_201645:exon1:c.C243T:p.F81F	1qD
chr1	88212317	88212317	T	C	exonic	Ugt1a1	.	nonsynonymous SNV	Ugt1a1:NM_201645:exon1:c.T316C:p.S106P	1qD
chr1	88212321	88212321	T	G	exonic	Ugt1a1	.	nonsynonymous SNV	Ugt1a1:NM_201645:exon1:c.T320G:p.F107C	1qD
chr1	88212331	88212331	C	T	exonic	Ugt1a1	.	synonymous SNV	Ugt1a1:NM_201645:exon1:c.C330T:p.R110R	1qD
chr1	88212382	88212382	T	A	exonic	Ugt1a1	.	synonymous SNV	Ugt1a1:NM_201645:exon1:c.T381A:p.A127A	1qD
chr1	88212392	88212392	C	T	exonic	Ugt1a1	.	nonsynonymous SNV	Ugt1a1:NM_201645:exon1:c.C391T:p.H131Y	1qD
chr1	88212409	88212409	C	T	exonic	Ugt1a1	.	synonymous SNV	Ugt1a1:NM_201645:exon1:c.C408T:p.A136A	1qD
chr1	88212452	88212452	C	A	exonic	Ugt1a1	.	nonsynonymous SNV	Ugt1a1:NM_201645:exon1:c.C451A:p.L151M	1qD
chr1	88212465	88212465	T	C	exonic	Ugt1a1	.	nonsynonymous SNV	Ugt1a1:NM_201645:exon1:c.T464C:p.F155S	1qD
chr1	88212528	88212528	A	C	exonic	Ugt1a1	.	nonsynonymous SNV	Ugt1a1:NM_201645:exon1:c.A527C:p.K176T	1qD
chr1	88212549	88212549	C	T	exonic	Ugt1a1	.	nonsynonymous SNV	Ugt1a1:NM_201645:exon1:c.C548T:p.S183L	1qD
chr1	88212550	88212550	A	G	exonic	Ugt1a1	.	synonymous SNV	Ugt1a1:NM_201645:exon1:c.A549G:p.S183S	1qD
chr1	88212555	88212555	C	T	exonic	Ugt1a1	.	nonsynonymous SNV	Ugt1a1:NM_201645:exon1:c.C554T:p.A185V	1qD
chr1	88212568	88212568	C	T	exonic	Ugt1a1	.	synonymous SNV	Ugt1a1:NM_201645:exon1:c.C567T:p.P189P	1qD
chr1	88212637	88212637	G	A	exonic	Ugt1a1	.	synonymous SNV	Ugt1a1:NM_201645:exon1:c.G636A:p.V212V	1qD
chr1	88212655	88212655	C	T	exonic	Ugt1a1	.	synonymous SNV	Ugt1a1:NM_201645:exon1:c.C654T:p.A218A	1qD
chr1	88212696	88212696	A	T	exonic	Ugt1a1	.	nonsynonymous SNV	Ugt1a1:NM_201645:exon1:c.A695T:p.Y232F	1qD
chr1	88212730	88212730	A	G	exonic	Ugt1a1	.	synonymous SNV	Ugt1a1:NM_201645:exon1:c.A729G:p.E243E	1qD
chr1	88212740	88212740	C	A	exonic	Ugt1a1	.	nonsynonymous SNV	Ugt1a1:NM_201645:exon1:c.C739A:p.Q247K	1qD
chr1	88212778	88212778	A	G	exonic	Ugt1a1	.	synonymous SNV	Ugt1a1:NM_201645:exon1:c.A777G:p.R259R	1qD
chr1	88215054	88215054	C	T	exonic	Ugt1a1;Ugt1a10;Ugt1a2;Ugt1a5;Ugt1a6a;Ugt1a6b;Ugt1a7c;Ugt1a8;Ugt1a9	.	nonsynonymous SNV	Ugt1a8:NM_001378375:exon2:c.C866T:p.A289V,Ugt1a2:NM_013701:exon2:c.C875T:p.A292V,Ugt1a10:NM_201641:exon2:c.C866T:p.A289V,Ugt1a7c:NM_201642:exon2:c.C869T:p.A290V,Ugt1a5:NM_201643:exon2:c.C863T:p.A288V,Ugt1a9:NM_201644:exon2:c.C860T:p.A287V,Ugt1a1:NM_201645:exon2:c.C881T:p.A294V,Ugt1a6a:NM_145079:exon3:c.C869T:p.A290V,Ugt1a6b:NM_201410:exon3:c.C869T:p.A290V	1qD
chr1	88215088	88215088	T	G	exonic	Ugt1a1;Ugt1a10;Ugt1a2;Ugt1a5;Ugt1a6a;Ugt1a6b;Ugt1a7c;Ugt1a8;Ugt1a9	.	synonymous SNV	Ugt1a8:NM_001378375:exon2:c.T900G:p.V300V,Ugt1a2:NM_013701:exon2:c.T909G:p.V303V,Ugt1a10:NM_201641:exon2:c.T900G:p.V300V,Ugt1a7c:NM_201642:exon2:c.T903G:p.V301V,Ugt1a5:NM_201643:exon2:c.T897G:p.V299V,Ugt1a9:NM_201644:exon2:c.T894G:p.V298V,Ugt1a1:NM_201645:exon2:c.T915G:p.V305V,Ugt1a6a:NM_145079:exon3:c.T903G:p.V301V,Ugt1a6b:NM_201410:exon3:c.T903G:p.V301V	1qD
chr1	88215123	88215123	C	T	exonic	Ugt1a1;Ugt1a10;Ugt1a2;Ugt1a5;Ugt1a6a;Ugt1a6b;Ugt1a7c;Ugt1a8;Ugt1a9	.	nonsynonymous SNV	Ugt1a8:NM_001378375:exon2:c.C935T:p.P312L,Ugt1a2:NM_013701:exon2:c.C944T:p.P315L,Ugt1a10:NM_201641:exon2:c.C935T:p.P312L,Ugt1a7c:NM_201642:exon2:c.C938T:p.P313L,Ugt1a5:NM_201643:exon2:c.C932T:p.P311L,Ugt1a9:NM_201644:exon2:c.C929T:p.P310L,Ugt1a1:NM_201645:exon2:c.C950T:p.P317L,Ugt1a6a:NM_145079:exon3:c.C938T:p.P313L,Ugt1a6b:NM_201410:exon3:c.C938T:p.P313L	1qD
chr1	88215174	88215174	C	T	exonic	Ugt1a1;Ugt1a10;Ugt1a2;Ugt1a5;Ugt1a6a;Ugt1a6b;Ugt1a7c;Ugt1a8;Ugt1a9	.	nonsynonymous SNV	Ugt1a8:NM_001378375:exon2:c.C986T:p.T329M,Ugt1a2:NM_013701:exon2:c.C995T:p.T332M,Ugt1a10:NM_201641:exon2:c.C986T:p.T329M,Ugt1a7c:NM_201642:exon2:c.C989T:p.T330M,Ugt1a5:NM_201643:exon2:c.C983T:p.T328M,Ugt1a9:NM_201644:exon2:c.C980T:p.T327M,Ugt1a1:NM_201645:exon2:c.C1001T:p.T334M,Ugt1a6a:NM_145079:exon3:c.C989T:p.T330M,Ugt1a6b:NM_201410:exon3:c.C989T:p.T330M	1qD
chr1	88216213	88216213	C	T	exonic	Ugt1a1;Ugt1a10;Ugt1a2;Ugt1a5;Ugt1a6a;Ugt1a6b;Ugt1a7c;Ugt1a8;Ugt1a9	.	nonsynonymous SNV	Ugt1a8:NM_001378375:exon4:c.C1151T:p.P384L,Ugt1a2:NM_013701:exon4:c.C1160T:p.P387L,Ugt1a10:NM_201641:exon4:c.C1151T:p.P384L,Ugt1a7c:NM_201642:exon4:c.C1154T:p.P385L,Ugt1a5:NM_201643:exon4:c.C1148T:p.P383L,Ugt1a9:NM_201644:exon4:c.C1145T:p.P382L,Ugt1a1:NM_201645:exon4:c.C1166T:p.P389L,Ugt1a6a:NM_145079:exon5:c.C1154T:p.P385L,Ugt1a6b:NM_201410:exon5:c.C1154T:p.P385L	1qD
chr1	88216261	88216261	G	A	exonic	Ugt1a1;Ugt1a10;Ugt1a2;Ugt1a5;Ugt1a6a;Ugt1a6b;Ugt1a7c;Ugt1a8;Ugt1a9	.	nonsynonymous SNV	Ugt1a8:NM_001378375:exon4:c.G1199A:p.R400H,Ugt1a2:NM_013701:exon4:c.G1208A:p.R403H,Ugt1a10:NM_201641:exon4:c.G1199A:p.R400H,Ugt1a7c:NM_201642:exon4:c.G1202A:p.R401H,Ugt1a5:NM_201643:exon4:c.G1196A:p.R399H,Ugt1a9:NM_201644:exon4:c.G1193A:p.R398H,Ugt1a1:NM_201645:exon4:c.G1214A:p.R405H,Ugt1a6a:NM_145079:exon5:c.G1202A:p.R401H,Ugt1a6b:NM_201410:exon5:c.G1202A:p.R401H	1qD
chr1	88216273	88216273	G	C	exonic	Ugt1a1;Ugt1a10;Ugt1a2;Ugt1a5;Ugt1a6a;Ugt1a6b;Ugt1a7c;Ugt1a8;Ugt1a9	.	nonsynonymous SNV	Ugt1a8:NM_001378375:exon4:c.G1211C:p.R404P,Ugt1a2:NM_013701:exon4:c.G1220C:p.R407P,Ugt1a10:NM_201641:exon4:c.G1211C:p.R404P,Ugt1a7c:NM_201642:exon4:c.G1214C:p.R405P,Ugt1a5:NM_201643:exon4:c.G1208C:p.R403P,Ugt1a9:NM_201644:exon4:c.G1205C:p.R402P,Ugt1a1:NM_201645:exon4:c.G1226C:p.R409P,Ugt1a6a:NM_145079:exon5:c.G1214C:p.R405P,Ugt1a6b:NM_201410:exon5:c.G1214C:p.R405P	1qD
chr1	88218146	88218146	C	A	exonic	Ugt1a1;Ugt1a10;Ugt1a2;Ugt1a5;Ugt1a6a;Ugt1a6b;Ugt1a7c;Ugt1a8;Ugt1a9	.	nonsynonymous SNV	Ugt1a8:NM_001378375:exon5:c.C1315A:p.R439S,Ugt1a2:NM_013701:exon5:c.C1324A:p.R442S,Ugt1a10:NM_201641:exon5:c.C1315A:p.R439S,Ugt1a7c:NM_201642:exon5:c.C1318A:p.R440S,Ugt1a5:NM_201643:exon5:c.C1312A:p.R438S,Ugt1a9:NM_201644:exon5:c.C1309A:p.R437S,Ugt1a1:NM_201645:exon5:c.C1330A:p.R444S,Ugt1a6a:NM_145079:exon6:c.C1318A:p.R440S,Ugt1a6b:NM_201410:exon6:c.C1318A:p.R440S	1qD
chr1	88218240	88218240	A	T	exonic	Ugt1a1;Ugt1a10;Ugt1a2;Ugt1a5;Ugt1a6a;Ugt1a6b;Ugt1a7c;Ugt1a8;Ugt1a9	.	nonsynonymous SNV	Ugt1a8:NM_001378375:exon5:c.A1409T:p.H470L,Ugt1a2:NM_013701:exon5:c.A1418T:p.H473L,Ugt1a10:NM_201641:exon5:c.A1409T:p.H470L,Ugt1a7c:NM_201642:exon5:c.A1412T:p.H471L,Ugt1a5:NM_201643:exon5:c.A1406T:p.H469L,Ugt1a9:NM_201644:exon5:c.A1403T:p.H468L,Ugt1a1:NM_201645:exon5:c.A1424T:p.H475L,Ugt1a6a:NM_145079:exon6:c.A1412T:p.H471L,Ugt1a6b:NM_201410:exon6:c.A1412T:p.H471L	1qD
chr1	88218245	88218245	C	T	exonic	Ugt1a1;Ugt1a10;Ugt1a2;Ugt1a5;Ugt1a6a;Ugt1a6b;Ugt1a7c;Ugt1a8;Ugt1a9	.	nonsynonymous SNV	Ugt1a8:NM_001378375:exon5:c.C1414T:p.R472C,Ugt1a2:NM_013701:exon5:c.C1423T:p.R475C,Ugt1a10:NM_201641:exon5:c.C1414T:p.R472C,Ugt1a7c:NM_201642:exon5:c.C1417T:p.R473C,Ugt1a5:NM_201643:exon5:c.C1411T:p.R471C,Ugt1a9:NM_201644:exon5:c.C1408T:p.R470C,Ugt1a1:NM_201645:exon5:c.C1429T:p.R477C,Ugt1a6a:NM_145079:exon6:c.C1417T:p.R473C,Ugt1a6b:NM_201410:exon6:c.C1417T:p.R473C	1qD
chr1	88218279	88218279	A	T	exonic	Ugt1a1;Ugt1a10;Ugt1a2;Ugt1a5;Ugt1a6a;Ugt1a6b;Ugt1a7c;Ugt1a8;Ugt1a9	.	nonsynonymous SNV	Ugt1a8:NM_001378375:exon5:c.A1448T:p.Y483F,Ugt1a2:NM_013701:exon5:c.A1457T:p.Y486F,Ugt1a10:NM_201641:exon5:c.A1448T:p.Y483F,Ugt1a7c:NM_201642:exon5:c.A1451T:p.Y484F,Ugt1a5:NM_201643:exon5:c.A1445T:p.Y482F,Ugt1a9:NM_201644:exon5:c.A1442T:p.Y481F,Ugt1a1:NM_201645:exon5:c.A1463T:p.Y488F,Ugt1a6a:NM_145079:exon6:c.A1451T:p.Y484F,Ugt1a6b:NM_201410:exon6:c.A1451T:p.Y484F	1qD
chr1	88218283	88218283	C	G	exonic	Ugt1a1;Ugt1a10;Ugt1a2;Ugt1a5;Ugt1a6a;Ugt1a6b;Ugt1a7c;Ugt1a8;Ugt1a9	.	nonsynonymous SNV	Ugt1a8:NM_001378375:exon5:c.C1452G:p.H484Q,Ugt1a2:NM_013701:exon5:c.C1461G:p.H487Q,Ugt1a10:NM_201641:exon5:c.C1452G:p.H484Q,Ugt1a7c:NM_201642:exon5:c.C1455G:p.H485Q,Ugt1a5:NM_201643:exon5:c.C1449G:p.H483Q,Ugt1a9:NM_201644:exon5:c.C1446G:p.H482Q,Ugt1a1:NM_201645:exon5:c.C1467G:p.H489Q,Ugt1a6a:NM_145079:exon6:c.C1455G:p.H485Q,Ugt1a6b:NM_201410:exon6:c.C1455G:p.H485Q	1qD
chr1	88218360	88218360	G	A	exonic	Ugt1a1;Ugt1a10;Ugt1a2;Ugt1a5;Ugt1a6a;Ugt1a6b;Ugt1a7c;Ugt1a8;Ugt1a9	.	nonsynonymous SNV	Ugt1a8:NM_001378375:exon5:c.G1529A:p.G510D,Ugt1a2:NM_013701:exon5:c.G1538A:p.G513D,Ugt1a10:NM_201641:exon5:c.G1529A:p.G510D,Ugt1a7c:NM_201642:exon5:c.G1532A:p.G511D,Ugt1a5:NM_201643:exon5:c.G1526A:p.G509D,Ugt1a9:NM_201644:exon5:c.G1523A:p.G508D,Ugt1a1:NM_201645:exon5:c.G1544A:p.G515D,Ugt1a6a:NM_145079:exon6:c.G1532A:p.G511D,Ugt1a6b:NM_201410:exon6:c.G1532A:p.G511D	1qD
chr1	88218388	88218388	G	A	exonic	Ugt1a1;Ugt1a10;Ugt1a2;Ugt1a5;Ugt1a6a;Ugt1a6b;Ugt1a7c;Ugt1a8;Ugt1a9	.	synonymous SNV	Ugt1a8:NM_001378375:exon5:c.G1557A:p.G519G,Ugt1a2:NM_013701:exon5:c.G1566A:p.G522G,Ugt1a10:NM_201641:exon5:c.G1557A:p.G519G,Ugt1a7c:NM_201642:exon5:c.G1560A:p.G520G,Ugt1a5:NM_201643:exon5:c.G1554A:p.G518G,Ugt1a9:NM_201644:exon5:c.G1551A:p.G517G,Ugt1a1:NM_201645:exon5:c.G1572A:p.G524G,Ugt1a6a:NM_145079:exon6:c.G1560A:p.G520G,Ugt1a6b:NM_201410:exon6:c.G1560A:p.G520G	1qD
chr1	88228380	88228380	C	A	exonic	Mroh2a	.	nonsynonymous SNV	Mroh2a:NM_001281466:exon3:c.C233A:p.A78E	1qD
chr1	88230368	88230368	C	A	exonic	Mroh2a	.	synonymous SNV	Mroh2a:NM_001281466:exon4:c.C288A:p.I96I	1qD
chr1	88230637	88230637	T	C	exonic	Mroh2a	.	synonymous SNV	Mroh2a:NM_001281466:exon5:c.T405C:p.F135F	1qD
chr1	88230644	88230644	G	A	exonic	Mroh2a	.	nonsynonymous SNV	Mroh2a:NM_001281466:exon5:c.G412A:p.A138T	1qD
chr1	88230650	88230650	G	A	exonic	Mroh2a	.	nonsynonymous SNV	Mroh2a:NM_001281466:exon5:c.G418A:p.V140M	1qD
chr1	88230667	88230667	A	C	exonic	Mroh2a	.	synonymous SNV	Mroh2a:NM_001281466:exon5:c.A435C:p.L145L	1qD
chr1	88230668	88230668	G	A	exonic	Mroh2a	.	nonsynonymous SNV	Mroh2a:NM_001281466:exon5:c.G436A:p.V146M	1qD
chr1	88230680	88230680	C	T	exonic	Mroh2a	.	stopgain	Mroh2a:NM_001281466:exon5:c.C448T:p.R150X	1qD
chr1	88230746	88230746	G	A	exonic	Mroh2a	.	nonsynonymous SNV	Mroh2a:NM_001281466:exon5:c.G514A:p.E172K	1qD
chr1	88232292	88232292	C	T	exonic	Mroh2a	.	nonsynonymous SNV	Mroh2a:NM_001281466:exon6:c.C605T:p.T202M	1qD
chr1	88232324	88232324	C	T	exonic	Mroh2a	.	nonsynonymous SNV	Mroh2a:NM_001281466:exon6:c.C637T:p.R213C	1qD
chr1	88233327	88233327	G	A	exonic	Mroh2a	.	synonymous SNV	Mroh2a:NM_001281466:exon7:c.G666A:p.T222T	1qD
chr1	88233340	88233340	G	A	exonic	Mroh2a	.	nonsynonymous SNV	Mroh2a:NM_001281466:exon7:c.G679A:p.V227M	1qD
chr1	88233390	88233390	G	A	exonic	Mroh2a	.	synonymous SNV	Mroh2a:NM_001281466:exon7:c.G729A:p.T243T	1qD
chr1	88233393	88233393	G	A	exonic	Mroh2a	.	synonymous SNV	Mroh2a:NM_001281466:exon7:c.G732A:p.E244E	1qD
chr1	88233417	88233417	C	T	exonic	Mroh2a	.	synonymous SNV	Mroh2a:NM_001281466:exon7:c.C756T:p.F252F	1qD
chr1	88233428	88233428	G	A	exonic	Mroh2a	.	nonsynonymous SNV	Mroh2a:NM_001281466:exon7:c.G767A:p.R256Q	1qD
chr1	88233435	88233435	C	T	exonic	Mroh2a	.	synonymous SNV	Mroh2a:NM_001281466:exon7:c.C774T:p.F258F	1qD
chr1	88233442	88233442	G	T	exonic	Mroh2a	.	nonsynonymous SNV	Mroh2a:NM_001281466:exon7:c.G781T:p.V261L	1qD
chr1	88234040	88234040	G	C	exonic	Mroh2a	.	synonymous SNV	Mroh2a:NM_001281466:exon8:c.G846C:p.L282L	1qD
chr1	88234120	88234120	G	A	exonic	Mroh2a	.	nonsynonymous SNV	Mroh2a:NM_001281466:exon8:c.G926A:p.G309D	1qD
chr1	88234137	88234137	G	A	exonic	Mroh2a	.	nonsynonymous SNV	Mroh2a:NM_001281466:exon8:c.G943A:p.V315I	1qD
chr1	88234981	88234981	G	A	exonic	Mroh2a	.	synonymous SNV	Mroh2a:NM_001281466:exon9:c.G963A:p.Q321Q	1qD
chr1	88234996	88234996	G	A	exonic	Mroh2a	.	synonymous SNV	Mroh2a:NM_001281466:exon9:c.G978A:p.S326S	1qD
chr1	88235023	88235023	G	A	exonic	Mroh2a	.	synonymous SNV	Mroh2a:NM_001281466:exon9:c.G1005A:p.P335P	1qD
chr1	88235051	88235051	T	C	exonic	Mroh2a	.	synonymous SNV	Mroh2a:NM_001281466:exon9:c.T1033C:p.L345L	1qD
chr1	88235254	88235254	G	A	exonic	Mroh2a	.	nonsynonymous SNV	Mroh2a:NM_001281466:exon10:c.G1109A:p.C370Y	1qD
chr1	88235442	88235442	G	A	exonic	Mroh2a	.	nonsynonymous SNV	Mroh2a:NM_001281466:exon11:c.G1193A:p.R398H	1qD
chr1	88235449	88235449	G	T	exonic	Mroh2a	.	synonymous SNV	Mroh2a:NM_001281466:exon11:c.G1200T:p.G400G	1qD
chr1	88236665	88236665	T	G	exonic	Mroh2a	.	nonsynonymous SNV	Mroh2a:NM_001281466:exon12:c.T1248G:p.I416M	1qD
chr1	88236695	88236695	C	G	exonic	Mroh2a	.	synonymous SNV	Mroh2a:NM_001281466:exon12:c.C1278G:p.R426R	1qD
chr1	88237491	88237491	C	T	exonic	Mroh2a	.	stopgain	Mroh2a:NM_001281466:exon13:c.C1333T:p.R445X	1qD
chr1	88237541	88237541	C	A	exonic	Mroh2a	.	synonymous SNV	Mroh2a:NM_001281466:exon13:c.C1383A:p.G461G	1qD
chr1	88237852	88237852	G	T	exonic	Mroh2a	.	nonsynonymous SNV	Mroh2a:NM_001281466:exon14:c.G1442T:p.R481L	1qD
chr1	88237853	88237853	A	C	exonic	Mroh2a	.	synonymous SNV	Mroh2a:NM_001281466:exon14:c.A1443C:p.R481R	1qD
chr1	88237944	88237944	G	A	exonic	Mroh2a	.	nonsynonymous SNV	Mroh2a:NM_001281466:exon14:c.G1534A:p.G512S	1qD
chr1	88238947	88238947	A	G	exonic	Mroh2a	.	synonymous SNV	Mroh2a:NM_001281466:exon15:c.A1599G:p.A533A	1qD
chr1	88238983	88238983	C	T	exonic	Mroh2a	.	synonymous SNV	Mroh2a:NM_001281466:exon15:c.C1635T:p.A545A	1qD
chr1	88239000	88239000	G	T	exonic	Mroh2a	.	nonsynonymous SNV	Mroh2a:NM_001281466:exon15:c.G1652T:p.G551V	1qD
chr1	88239006	88239006	A	C	exonic	Mroh2a	.	nonsynonymous SNV	Mroh2a:NM_001281466:exon15:c.A1658C:p.D553A	1qD
chr1	88240124	88240124	T	C	exonic	Mroh2a	.	synonymous SNV	Mroh2a:NM_001281466:exon16:c.T1699C:p.L567L	1qD
chr1	88240149	88240149	C	T	exonic	Mroh2a	.	nonsynonymous SNV	Mroh2a:NM_001281466:exon16:c.C1724T:p.A575V	1qD
chr1	88240703	88240703	G	A	exonic	Mroh2a	.	nonsynonymous SNV	Mroh2a:NM_001281466:exon17:c.G1759A:p.G587R	1qD
chr1	88240709	88240709	G	T	exonic	Mroh2a	.	nonsynonymous SNV	Mroh2a:NM_001281466:exon17:c.G1765T:p.G589C	1qD
chr1	88240802	88240802	C	T	exonic	Mroh2a	.	synonymous SNV	Mroh2a:NM_001281466:exon17:c.C1858T:p.L620L	1qD
chr1	88241093	88241093	C	T	exonic	Mroh2a	.	synonymous SNV	Mroh2a:NM_001281466:exon18:c.C1899T:p.N633N	1qD
chr1	88241584	88241584	G	A	exonic	Mroh2a	.	stopgain	Mroh2a:NM_001281466:exon19:c.G1971A:p.W657X	1qD
chr1	88241590	88241590	A	G	exonic	Mroh2a	.	synonymous SNV	Mroh2a:NM_001281466:exon19:c.A1977G:p.L659L	1qD
chr1	88242417	88242417	G	T	exonic	Mroh2a	.	nonsynonymous SNV	Mroh2a:NM_001281466:exon20:c.G2051T:p.R684M	1qD
chr1	88242418	88242418	G	T	exonic	Mroh2a	.	nonsynonymous SNV	Mroh2a:NM_001281466:exon20:c.G2052T:p.R684S	1qD
chr1	88242420	88242420	C	A	exonic	Mroh2a	.	nonsynonymous SNV	Mroh2a:NM_001281466:exon20:c.C2054A:p.A685D	1qD
chr1	88242421	88242421	C	A	exonic	Mroh2a	.	synonymous SNV	Mroh2a:NM_001281466:exon20:c.C2055A:p.A685A	1qD
chr1	88242508	88242508	T	C	exonic	Mroh2a	.	synonymous SNV	Mroh2a:NM_001281466:exon20:c.T2142C:p.N714N	1qD
chr1	88242511	88242511	T	C	exonic	Mroh2a	.	synonymous SNV	Mroh2a:NM_001281466:exon20:c.T2145C:p.D715D	1qD
chr1	88242760	88242760	C	T	exonic	Mroh2a	.	nonsynonymous SNV	Mroh2a:NM_001281466:exon21:c.C2249T:p.S750L	1qD
chr1	88242764	88242764	A	G	exonic	Mroh2a	.	synonymous SNV	Mroh2a:NM_001281466:exon21:c.A2253G:p.E751E	1qD
chr1	88242779	88242779	C	T	exonic	Mroh2a	.	synonymous SNV	Mroh2a:NM_001281466:exon21:c.C2268T:p.I756I	1qD
chr1	88243950	88243950	G	A	exonic	Mroh2a	.	nonsynonymous SNV	Mroh2a:NM_001281466:exon22:c.G2300A:p.R767Q	1qD
chr1	88244014	88244014	G	A	exonic	Mroh2a	.	synonymous SNV	Mroh2a:NM_001281466:exon22:c.G2364A:p.Q788Q	1qD
chr1	88244970	88244970	G	T	exonic	Mroh2a	.	nonsynonymous SNV	Mroh2a:NM_001281466:exon23:c.G2460T:p.M820I	1qD
chr1	88244995	88244995	G	T	exonic	Mroh2a	.	nonsynonymous SNV	Mroh2a:NM_001281466:exon23:c.G2485T:p.A829S	1qD
chr1	88245989	88245989	T	C	exonic	Mroh2a	.	nonsynonymous SNV	Mroh2a:NM_001281466:exon24:c.T2558C:p.V853A	1qD
chr1	88246065	88246065	A	G	exonic	Mroh2a	.	synonymous SNV	Mroh2a:NM_001281466:exon24:c.A2634G:p.L878L	1qD
chr1	88247139	88247139	G	A	exonic	Mroh2a	.	synonymous SNV	Mroh2a:NM_001281466:exon25:c.G2640A:p.T880T	1qD
chr1	88247140	88247140	A	C	exonic	Mroh2a	.	nonsynonymous SNV	Mroh2a:NM_001281466:exon25:c.A2641C:p.M881L	1qD
chr1	88247232	88247232	T	C	exonic	Mroh2a	.	synonymous SNV	Mroh2a:NM_001281466:exon25:c.T2733C:p.N911N	1qD
chr1	88247237	88247237	C	T	exonic	Mroh2a	.	nonsynonymous SNV	Mroh2a:NM_001281466:exon25:c.C2738T:p.S913F	1qD
chr1	88247763	88247763	A	G	exonic	Mroh2a	.	nonsynonymous SNV	Mroh2a:NM_001281466:exon26:c.A2761G:p.T921A	1qD
chr1	88248555	88248555	C	A	exonic	Mroh2a	.	nonsynonymous SNV	Mroh2a:NM_001281466:exon27:c.C2845A:p.L949M	1qD
chr1	88248584	88248584	G	A	exonic	Mroh2a	.	synonymous SNV	Mroh2a:NM_001281466:exon27:c.G2874A:p.E958E	1qD
chr1	88248614	88248614	T	C	exonic	Mroh2a	.	synonymous SNV	Mroh2a:NM_001281466:exon27:c.T2904C:p.H968H	1qD
chr1	88248621	88248621	C	T	exonic	Mroh2a	.	nonsynonymous SNV	Mroh2a:NM_001281466:exon27:c.C2911T:p.L971F	1qD
chr1	88249744	88249744	C	T	exonic	Mroh2a	.	synonymous SNV	Mroh2a:NM_001281466:exon28:c.C2988T:p.L996L	1qD
chr1	88250266	88250266	A	G	exonic	Mroh2a	.	synonymous SNV	Mroh2a:NM_001281466:exon29:c.A3072G:p.V1024V	1qD
chr1	88250268	88250268	G	A	exonic	Mroh2a	.	nonsynonymous SNV	Mroh2a:NM_001281466:exon29:c.G3074A:p.S1025N	1qD
chr1	88250342	88250342	G	A	exonic	Mroh2a	.	nonsynonymous SNV	Mroh2a:NM_001281466:exon29:c.G3148A:p.D1050N	1qD
chr1	88251267	88251267	G	T	exonic	Mroh2a	.	nonsynonymous SNV	Mroh2a:NM_001281466:exon30:c.G3212T:p.C1071F	1qD
chr1	88251289	88251289	C	T	exonic	Mroh2a	.	synonymous SNV	Mroh2a:NM_001281466:exon30:c.C3234T:p.I1078I	1qD
chr1	88251346	88251346	C	T	exonic	Mroh2a	.	synonymous SNV	Mroh2a:NM_001281466:exon30:c.C3291T:p.V1097V	1qD
chr1	88251385	88251385	G	T	exonic	Mroh2a	.	nonsynonymous SNV	Mroh2a:NM_001281466:exon30:c.G3330T:p.E1110D	1qD
chr1	88252383	88252383	T	C	exonic	Mroh2a	.	synonymous SNV	Mroh2a:NM_001281466:exon31:c.T3390C:p.D1130D	1qD
chr1	88252401	88252401	A	G	exonic	Mroh2a	.	synonymous SNV	Mroh2a:NM_001281466:exon31:c.A3408G:p.R1136R	1qD
chr1	88252458	88252458	A	G	exonic	Mroh2a	.	synonymous SNV	Mroh2a:NM_001281466:exon31:c.A3465G:p.T1155T	1qD
chr1	88252477	88252477	C	T	exonic	Mroh2a	.	synonymous SNV	Mroh2a:NM_001281466:exon31:c.C3484T:p.L1162L	1qD
chr1	88254906	88254906	A	C	exonic	Mroh2a	.	synonymous SNV	Mroh2a:NM_001281466:exon32:c.A3546C:p.A1182A	1qD
chr1	88254948	88254948	G	A	exonic	Mroh2a	.	synonymous SNV	Mroh2a:NM_001281466:exon32:c.G3588A:p.R1196R	1qD
chr1	88254965	88254965	A	T	exonic	Mroh2a	.	nonsynonymous SNV	Mroh2a:NM_001281466:exon32:c.A3605T:p.N1202I	1qD
chr1	88255203	88255203	G	A	exonic	Mroh2a	.	synonymous SNV	Mroh2a:NM_001281466:exon33:c.G3771A:p.G1257G	1qD
chr1	88255245	88255245	T	C	exonic	Mroh2a	.	synonymous SNV	Mroh2a:NM_001281466:exon33:c.T3813C:p.V1271V	1qD
chr1	88255275	88255275	C	T	exonic	Mroh2a	.	synonymous SNV	Mroh2a:NM_001281466:exon33:c.C3843T:p.T1281T	1qD
chr1	88255607	88255607	T	C	exonic	Mroh2a	.	synonymous SNV	Mroh2a:NM_001281466:exon34:c.T3916C:p.L1306L	1qD
chr1	88256090	88256090	G	A	exonic	Mroh2a	.	synonymous SNV	Mroh2a:NM_001281466:exon35:c.G4023A:p.Q1341Q	1qD
chr1	88256127	88256127	G	A	exonic	Mroh2a	.	nonsynonymous SNV	Mroh2a:NM_001281466:exon35:c.G4060A:p.E1354K	1qD
chr1	88256155	88256155	C	T	exonic	Mroh2a	.	nonsynonymous SNV	Mroh2a:NM_001281466:exon35:c.C4088T:p.T1363M	1qD
chr1	88256413	88256413	C	T	exonic	Mroh2a	.	nonsynonymous SNV	Mroh2a:NM_001281466:exon36:c.C4118T:p.P1373L	1qD
chr1	88256468	88256468	T	C	exonic	Mroh2a	.	synonymous SNV	Mroh2a:NM_001281466:exon36:c.T4173C:p.G1391G	1qD
chr1	88256545	88256545	G	A	exonic	Mroh2a	.	nonsynonymous SNV	Mroh2a:NM_001281466:exon36:c.G4250A:p.R1417Q	1qD
chr1	88256705	88256705	C	T	exonic	Mroh2a	.	stopgain	Mroh2a:NM_001281466:exon37:c.C4309T:p.Q1437X	1qD
chr1	88256727	88256727	C	T	exonic	Mroh2a	.	nonsynonymous SNV	Mroh2a:NM_001281466:exon37:c.C4331T:p.A1444V	1qD
chr1	88256798	88256798	G	A	exonic	Mroh2a	.	nonsynonymous SNV	Mroh2a:NM_001281466:exon37:c.G4402A:p.A1468T	1qD
chr1	88257739	88257739	T	C	exonic	Mroh2a	.	synonymous SNV	Mroh2a:NM_001281466:exon38:c.T4467C:p.F1489F	1qD
chr1	88258633	88258633	C	T	exonic	Mroh2a	.	synonymous SNV	Mroh2a:NM_001281466:exon39:c.C4644T:p.S1548S	1qD
chr1	88258708	88258708	C	T	exonic	Mroh2a	.	synonymous SNV	Mroh2a:NM_001281466:exon39:c.C4719T:p.S1573S	1qD
chr1	88259567	88259567	A	G	exonic	Mroh2a	.	synonymous SNV	Mroh2a:NM_001281466:exon41:c.A4866G:p.K1622K	1qD
chr1	88259973	88259973	C	T	exonic	Mroh2a	.	synonymous SNV	Mroh2a:NM_001281466:exon42:c.C4963T:p.L1655L	1qD
chr1	88260002	88260002	A	C	exonic	Mroh2a	.	nonsynonymous SNV	Mroh2a:NM_001281466:exon42:c.A4992C:p.L1664F	1qD
chr1	88260002	88260002	A	G	exonic	Mroh2a	.	synonymous SNV	Mroh2a:NM_001281466:exon42:c.A4992G:p.L1664L	1qD
chr1	88260003	88260003	G	T	exonic	Mroh2a	.	nonsynonymous SNV	Mroh2a:NM_001281466:exon42:c.G4993T:p.A1665S	1qD
chr1	88260004	88260004	C	T	exonic	Mroh2a	.	nonsynonymous SNV	Mroh2a:NM_001281466:exon42:c.C4994T:p.A1665V	1qD
chr1	88260005	88260005	G	A	exonic	Mroh2a	.	synonymous SNV	Mroh2a:NM_001281466:exon42:c.G4995A:p.A1665A	1qD
chr1	88265185	88265185	G	A	exonic	A730008H23Rik;Hjurp	.	nonsynonymous SNV	A730008H23Rik:NM_172505:exon5:c.C1772T:p.P591L,Hjurp:NM_198652:exon8:c.C2000T:p.P667L	1qD
chr1	88265258	88265258	A	G	exonic	A730008H23Rik;Hjurp	.	nonsynonymous SNV	A730008H23Rik:NM_172505:exon5:c.T1699C:p.C567R,Hjurp:NM_198652:exon8:c.T1927C:p.C643R	1qD
chr1	88265271	88265271	C	A	exonic	A730008H23Rik;Hjurp	.	synonymous SNV	A730008H23Rik:NM_172505:exon5:c.G1686T:p.L562L,Hjurp:NM_198652:exon8:c.G1914T:p.L638L	1qD
chr1	88265279	88265279	A	G	exonic	A730008H23Rik;Hjurp	.	nonsynonymous SNV	A730008H23Rik:NM_172505:exon5:c.T1678C:p.S560P,Hjurp:NM_198652:exon8:c.T1906C:p.S636P	1qD
chr1	88265280	88265280	G	C	exonic	A730008H23Rik;Hjurp	.	nonsynonymous SNV	A730008H23Rik:NM_172505:exon5:c.C1677G:p.D559E,Hjurp:NM_198652:exon8:c.C1905G:p.D635E	1qD
chr1	88265309	88265309	C	G	exonic	A730008H23Rik;Hjurp	.	nonsynonymous SNV	A730008H23Rik:NM_172505:exon5:c.G1648C:p.A550P,Hjurp:NM_198652:exon8:c.G1876C:p.A626P	1qD
chr1	88265472	88265472	C	T	exonic	A730008H23Rik;Hjurp	.	synonymous SNV	A730008H23Rik:NM_172505:exon5:c.G1485A:p.A495A,Hjurp:NM_198652:exon8:c.G1713A:p.A571A	1qD
chr1	88265570	88265570	T	A	exonic	A730008H23Rik;Hjurp	.	nonsynonymous SNV	A730008H23Rik:NM_172505:exon5:c.A1387T:p.S463C,Hjurp:NM_198652:exon8:c.A1615T:p.S539C	1qD
chr1	88265673	88265673	C	A	exonic	A730008H23Rik;Hjurp	.	synonymous SNV	A730008H23Rik:NM_172505:exon5:c.G1284T:p.P428P,Hjurp:NM_198652:exon8:c.G1512T:p.P504P	1qD
chr1	88265846	88265846	A	C	exonic	A730008H23Rik;Hjurp	.	nonsynonymous SNV	A730008H23Rik:NM_172505:exon5:c.T1111G:p.S371A,Hjurp:NM_198652:exon8:c.T1339G:p.S447A	1qD
chr1	88265892	88265892	C	G	exonic	A730008H23Rik;Hjurp	.	synonymous SNV	A730008H23Rik:NM_172505:exon5:c.G1065C:p.L355L,Hjurp:NM_198652:exon8:c.G1293C:p.L431L	1qD
chr1	88265980	88265980	T	G	exonic	A730008H23Rik;Hjurp	.	nonsynonymous SNV	A730008H23Rik:NM_172505:exon5:c.A977C:p.Q326P,Hjurp:NM_198652:exon8:c.A1205C:p.Q402P	1qD
chr1	88266046	88266046	A	C	exonic	A730008H23Rik;Hjurp	.	nonsynonymous SNV	A730008H23Rik:NM_172505:exon5:c.T911G:p.V304G,Hjurp:NM_198652:exon8:c.T1139G:p.V380G	1qD
chr1	88266121	88266121	G	A	exonic	A730008H23Rik;Hjurp	.	nonsynonymous SNV	A730008H23Rik:NM_172505:exon5:c.C836T:p.S279F,Hjurp:NM_198652:exon8:c.C1064T:p.S355F	1qD
chr1	88266195	88266195	G	A	exonic	A730008H23Rik;Hjurp	.	synonymous SNV	A730008H23Rik:NM_172505:exon5:c.C762T:p.H254H,Hjurp:NM_198652:exon8:c.C990T:p.H330H	1qD
chr1	88266241	88266241	G	T	exonic	A730008H23Rik;Hjurp	.	nonsynonymous SNV	A730008H23Rik:NM_172505:exon5:c.C716A:p.P239H,Hjurp:NM_198652:exon8:c.C944A:p.P315H	1qD
chr1	88266255	88266255	C	T	exonic	A730008H23Rik;Hjurp	.	synonymous SNV	A730008H23Rik:NM_172505:exon5:c.G702A:p.A234A,Hjurp:NM_198652:exon8:c.G930A:p.A310A	1qD
chr1	88266452	88266452	C	T	exonic	A730008H23Rik;Hjurp	.	nonsynonymous SNV	A730008H23Rik:NM_172505:exon5:c.G505A:p.D169N,Hjurp:NM_198652:exon8:c.G733A:p.D245N	1qD
chr1	88266616	88266616	T	C	exonic	A730008H23Rik;Hjurp	.	nonsynonymous SNV	A730008H23Rik:NM_172505:exon5:c.A341G:p.E114G,Hjurp:NM_198652:exon8:c.A569G:p.E190G	1qD
chr1	88269331	88269331	T	C	exonic	Hjurp	.	nonsynonymous SNV	Hjurp:NM_198652:exon6:c.A437G:p.E146G	1qD
chr1	88270269	88270269	A	G	exonic	Hjurp	.	nonsynonymous SNV	Hjurp:NM_198652:exon5:c.T287C:p.L96S	1qD
chr1	88270274	88270274	C	T	exonic	Hjurp	.	synonymous SNV	Hjurp:NM_198652:exon5:c.G282A:p.T94T	1qD
chr1	88272730	88272730	A	G	exonic	Hjurp	.	synonymous SNV	Hjurp:NM_198652:exon4:c.T255C:p.G85G	1qD
chr1	88277238	88277238	T	C	exonic	A730008H23Rik;Hjurp	.	synonymous SNV	A730008H23Rik:NM_172505:exon2:c.A144G:p.L48L,Hjurp:NM_198652:exon2:c.A144G:p.L48L	1qD
chr1	88277245	88277245	C	G	exonic	A730008H23Rik;Hjurp	.	nonsynonymous SNV	A730008H23Rik:NM_172505:exon2:c.G137C:p.R46T,Hjurp:NM_198652:exon2:c.G137C:p.R46T	1qD
chr1	88277410	88277410	G	A	exonic	A730008H23Rik;Hjurp	.	synonymous SNV	A730008H23Rik:NM_172505:exon1:c.C60T:p.S20S,Hjurp:NM_198652:exon1:c.C60T:p.S20S	1qD
chr1	88277413	88277413	A	T	exonic	A730008H23Rik;Hjurp	.	nonsynonymous SNV	A730008H23Rik:NM_172505:exon1:c.T57A:p.S19R,Hjurp:NM_198652:exon1:c.T57A:p.S19R	1qD
chr1	88277422	88277422	C	A	exonic	A730008H23Rik;Hjurp	.	nonsynonymous SNV	A730008H23Rik:NM_172505:exon1:c.G48T:p.K16N,Hjurp:NM_198652:exon1:c.G48T:p.K16N	1qD
chr1	88277434	88277434	A	C	exonic	A730008H23Rik;Hjurp	.	nonsynonymous SNV	A730008H23Rik:NM_172505:exon1:c.T36G:p.H12Q,Hjurp:NM_198652:exon1:c.T36G:p.H12Q	1qD
chr1	88277442	88277442	T	A	exonic	A730008H23Rik;Hjurp	.	nonsynonymous SNV	A730008H23Rik:NM_172505:exon1:c.A28T:p.R10W,Hjurp:NM_198652:exon1:c.A28T:p.R10W	1qD
chr1	128186886	128186886	G	A	exonic	R3hdm1	.	nonsynonymous SNV	R3hdm1:NM_001357482:exon16:c.G1603A:p.A535T,R3hdm1:NM_181750:exon16:c.G1603A:p.A535T	1qE3
chr1	160120541	160120541	C	A	exonic	Tnn	.	nonsynonymous SNV	Tnn:NM_177839:exon11:c.G2601T:p.K867N	1qH2.1
chr1	171356715	171356715	G	C	exonic	Pfdn2	.	nonsynonymous SNV	Pfdn2:NM_001360824:exon3:c.G175C:p.D59H,Pfdn2:NM_001360825:exon3:c.G31C:p.D11H,Pfdn2:NM_011070:exon3:c.G175C:p.D59H	1qH3
chr1	171357963	171357963	A	G	exonic	Pfdn2	.	synonymous SNV	Pfdn2:NM_001360825:exon4:c.A258G:p.A86A,Pfdn2:NM_011070:exon4:c.A402G:p.A134A	1qH3
chr1	177773679	177773679	G	A	exonic	Adss	.	nonsynonymous SNV	Adss:NM_007422:exon8:c.C686T:p.P229L	1qH4
chr10	52077947	52077947	C	T	exonic	Ros1	.	synonymous SNV	Ros1:NM_011282:exon36:c.G5658A:p.K1886K	10qB3
chr10	58230928	58230928	A	C	exonic	Dux	.	nonsynonymous SNV	Dux:NM_001081954:exon1:c.T1748G:p.M583R	10qB4
chr10	58231067	58231067	G	A	exonic	Dux	.	nonsynonymous SNV	Dux:NM_001081954:exon1:c.C1609T:p.L537F	10qB4
chr10	58231344	58231344	C	G	exonic	Dux	.	nonsynonymous SNV	Dux:NM_001081954:exon1:c.G1332C:p.L444F	10qB4
chr10	58231387	58231387	T	G	exonic	Dux	.	nonsynonymous SNV	Dux:NM_001081954:exon1:c.A1289C:p.Q430P	10qB4
chr10	58231676	58231676	A	C	exonic	Dux	.	nonsynonymous SNV	Dux:NM_001081954:exon1:c.T1000G:p.S334A	10qB4
chr10	58231704	58231704	A	C	exonic	Dux	.	nonsynonymous SNV	Dux:NM_001081954:exon1:c.T972G:p.F324L	10qB4
chr10	58231705	58231705	A	T	exonic	Dux	.	nonsynonymous SNV	Dux:NM_001081954:exon1:c.T971A:p.F324Y	10qB4
chr10	58231706	58231706	A	G	exonic	Dux	.	nonsynonymous SNV	Dux:NM_001081954:exon1:c.T970C:p.F324L	10qB4
chr10	58231743	58231743	T	A	exonic	Dux	.	synonymous SNV	Dux:NM_001081954:exon1:c.A933T:p.S311S	10qB4
chr10	58231793	58231793	T	C	exonic	Dux	.	nonsynonymous SNV	Dux:NM_001081954:exon1:c.A883G:p.K295E	10qB4
chr10	58231924	58231924	T	C	exonic	Dux	.	nonsynonymous SNV	Dux:NM_001081954:exon1:c.A752G:p.Q251R	10qB4
chr10	58231988	58231988	T	C	exonic	Dux	.	nonsynonymous SNV	Dux:NM_001081954:exon1:c.A688G:p.R230G	10qB4
chr10	58475312	58475312	C	G	exonic	Ranbp2	.	nonsynonymous SNV	Ranbp2:NM_011240:exon19:c.C2671G:p.P891A	10qB4
chr10	67238174	67238174	T	C	exonic	Jmjd1c	.	nonsynonymous SNV	Jmjd1c:NM_001242396:exon13:c.T5144C:p.L1715P,Jmjd1c:NM_207221:exon14:c.T5684C:p.L1895P	10qB5.1
chr10	75276917	75276917	A	G	exonic	Specc1l	.	nonsynonymous SNV	Specc1l:NM_153406:exon12:c.A2977G:p.S993G,Specc1l:NM_001145826:exon15:c.A3028G:p.S1010G	10qC1
chr10	77059925	77059925	G	T	exonic	Col18a1	.	synonymous SNV	Col18a1:NM_001109991:exon33:c.C3393A:p.P1131P,Col18a1:NM_009929:exon34:c.C2757A:p.P919P	10qC1
chr10	79169477	79169477	A	G	exonic	Vmn2r80	.	nonsynonymous SNV	Vmn2r80:NM_001103368:exon3:c.A947G:p.N316S	10qC1
chr10	87007858	87007858	G	A	exonic	Stab2	.	synonymous SNV	Stab2:NM_138673:exon1:c.C24T:p.L8L	10qC1
chr11	3133205	3133205	C	T	exonic	Sfi1	.	synonymous SNV	Sfi1:NM_001363224:exon26:c.G1788A:p.V596V,Sfi1:NM_001363222:exon27:c.G1863A:p.V621V,Sfi1:NM_001363223:exon27:c.G1863A:p.V621V,Sfi1:NM_030207:exon30:c.G3222A:p.V1074V	11qA1
chr11	3135671	3135671	C	T	exonic	Sfi1	.	nonsynonymous SNV	Sfi1:NM_001363224:exon22:c.G1219A:p.A407T,Sfi1:NM_001363222:exon23:c.G1294A:p.A432T,Sfi1:NM_001363223:exon23:c.G1294A:p.A432T,Sfi1:NM_030207:exon26:c.G2653A:p.A885T	11qA1
chr11	3186080	3186080	G	A	exonic	Sfi1	.	nonsynonymous SNV	Sfi1:NM_030207:exon4:c.C251T:p.T84I	11qA1
chr11	3187266	3187266	C	T	exonic	Sfi1	.	synonymous SNV	Sfi1:NM_030207:exon3:c.G168A:p.R56R	11qA1
chr11	3187367	3187367	T	C	exonic	Sfi1	.	nonsynonymous SNV	Sfi1:NM_030207:exon3:c.A67G:p.T23A	11qA1
chr11	46222615	46222615	G	A	exonic	Cyfip2	.	nonsynonymous SNV	Cyfip2:NM_001252459:exon25:c.C2903T:p.S968F,Cyfip2:NM_001252460:exon25:c.C2903T:p.S968F,Cyfip2:NM_133769:exon25:c.C2903T:p.S968F	11qB1.1
chr11	53186929	53186929	G	A	exonic	Fstl4	.	nonsynonymous SNV	Fstl4:NM_177059:exon16:c.G2512A:p.V838I	11qB1.3
chr11	53979573	53979573	T	C	exonic	Slc22a21	.	synonymous SNV	Slc22a21:NM_019723:exon1:c.A285G:p.L95L	11qB1.3
chr11	90480671	90480671	C	T	exonic	Stxbp4	.	nonsynonymous SNV	Stxbp4:NM_011505:exon18:c.G1603A:p.A535T	11qD
chr11	94363796	94363796	T	C	exonic	Abcc3	.	synonymous SNV	Abcc3:NM_001363187:exon16:c.A1962G:p.A654A,Abcc3:NM_001363189:exon16:c.A1962G:p.A654A,Abcc3:NM_029600:exon16:c.A1962G:p.A654A	11qD
chr11	116597085	116597085	C	T	exonic	Aanat	.	synonymous SNV	Aanat:NM_009591:exon4:c.C609T:p.S203S	11qE2
chr12	24215409	24215409	C	T	exonic	Gm21297	.	synonymous SNV	Gm21297:NM_001384261:exon4:c.G864A:p.Q288Q	12qA1.3
chr12	24215436	24215436	C	A	exonic	Gm21297	.	synonymous SNV	Gm21297:NM_001384261:exon4:c.G837T:p.T279T	12qA1.3
chr12	24215519	24215519	C	T	exonic	Gm21297	.	nonsynonymous SNV	Gm21297:NM_001384261:exon4:c.G754A:p.G252R	12qA1.3
chr12	24215546	24215546	G	C	exonic	Gm21297	.	nonsynonymous SNV	Gm21297:NM_001384261:exon4:c.C727G:p.L243V	12qA1.3
chr12	76059756	76059756	T	C	exonic	Syne2	.	nonsynonymous SNV	Syne2:NM_001005510:exon92:c.T16796C:p.I5599T	12qC3
chr12	87895659	87895659	A	C	exonic	Gm2022	.	nonsynonymous SNV	Gm2022:NM_001177574:exon2:c.A290C:p.Q97P	12qD2
chr13	12796849	12796849	T	C	exonic	Prl2c3;Prl2c4	.	synonymous SNV	Prl2c3:NM_011118:exon2:c.A189G:p.S63S,Prl2c4:NM_011954:exon2:c.A189G:p.S63S	13qA1
chr13	53117204	53117204	C	T	exonic	Ror2	.	nonsynonymous SNV	Ror2:NM_013846:exon7:c.G1114A:p.V372M	13qB1
chr13	64921972	64921972	C	T	exonic	Spata31	.	stopgain	Spata31:NM_030047:exon3:c.C1933T:p.R645X	13qB3
chr13	72630777	72630777	T	C	exonic	Irx2	.	synonymous SNV	Irx2:NM_010574:exon2:c.T459C:p.I153I	13qC1
chr13	93063579	93063579	C	G	exonic	Cmya5	.	nonsynonymous SNV	Cmya5:NM_023821:exon9:c.G10240C:p.A3414P	13qC3
chr13	100161909	100161909	A	T	exonic	Naip2	.	nonsynonymous SNV	Naip2:NM_001126182:exon11:c.T1618A:p.Y540N,Naip2:NM_010872:exon11:c.T1618A:p.Y540N	13qD1
chr13	100219746	100219746	G	A	exonic	Naip5	.	synonymous SNV	Naip5:NM_010870:exon11:c.C3360T:p.V1120V	13qD1
chr13	102736280	102736280	G	T	exonic	Mast4	.	nonsynonymous SNV	Mast4:NM_175171:exon29:c.C6579A:p.D2193E	13qD1
chr13	119477808	119477808	C	A	exonic	4833420G17Rik	.	nonsynonymous SNV	4833420G17Rik:NM_001113550:exon9:c.C1451A:p.T484K,4833420G17Rik:NM_001360805:exon9:c.C1451A:p.T484K,4833420G17Rik:NM_026127:exon10:c.C1451A:p.T484K	13qD2.3
chr13	119477809	119477809	A	G	exonic	4833420G17Rik	.	synonymous SNV	4833420G17Rik:NM_001113550:exon9:c.A1452G:p.T484T,4833420G17Rik:NM_001360805:exon9:c.A1452G:p.T484T,4833420G17Rik:NM_026127:exon10:c.A1452G:p.T484T	13qD2.3
chr13	119609236	119609236	T	C	exonic	Tmem267	.	synonymous SNV	Tmem267:NM_001039244:exon3:c.T357C:p.T119T,Tmem267:NM_001177666:exon3:c.T357C:p.T119T,Tmem267:NM_001370626:exon3:c.T357C:p.T119T,Tmem267:NM_001370627:exon3:c.T357C:p.T119T	13qD2.3
chr14	51456302	51456302	T	A	exonic	Vmn2r89	.	nonsynonymous SNV	Vmn2r89:NM_001378723:exon3:c.T1108A:p.F370I,Vmn2r89:NM_001385186:exon3:c.T1108A:p.F370I,Vmn2r89:NM_009486:exon3:c.T1108A:p.F370I,Vmn2r89:NM_009487:exon3:c.T1108A:p.F370I	14qC1
chr14	51456309	51456309	C	T	exonic	Vmn2r89	.	nonsynonymous SNV	Vmn2r89:NM_001378723:exon3:c.C1115T:p.S372F,Vmn2r89:NM_001385186:exon3:c.C1115T:p.S372F,Vmn2r89:NM_009486:exon3:c.C1115T:p.S372F,Vmn2r89:NM_009487:exon3:c.C1115T:p.S372F	14qC1
chr14	51456355	51456355	C	G	exonic	Vmn2r89	.	synonymous SNV	Vmn2r89:NM_001378723:exon3:c.C1161G:p.A387A,Vmn2r89:NM_001385186:exon3:c.C1161G:p.A387A,Vmn2r89:NM_009486:exon3:c.C1161G:p.A387A,Vmn2r89:NM_009487:exon3:c.C1161G:p.A387A	14qC1
chr14	51456382	51456382	T	C	exonic	Vmn2r89	.	synonymous SNV	Vmn2r89:NM_001378723:exon3:c.T1188C:p.Y396Y,Vmn2r89:NM_001385186:exon3:c.T1188C:p.Y396Y,Vmn2r89:NM_009486:exon3:c.T1188C:p.Y396Y,Vmn2r89:NM_009487:exon3:c.T1188C:p.Y396Y	14qC1
chr14	51456388	51456388	T	G	exonic	Vmn2r89	.	synonymous SNV	Vmn2r89:NM_001378723:exon3:c.T1194G:p.A398A,Vmn2r89:NM_001385186:exon3:c.T1194G:p.A398A,Vmn2r89:NM_009486:exon3:c.T1194G:p.A398A,Vmn2r89:NM_009487:exon3:c.T1194G:p.A398A	14qC1
chr14	51457381	51457381	G	A	exonic	Vmn2r89	.	synonymous SNV	Vmn2r89:NM_001378723:exon4:c.G1317A:p.R439R,Vmn2r89:NM_001385186:exon4:c.G1317A:p.R439R,Vmn2r89:NM_009487:exon4:c.G1317A:p.R439R	14qC1
chr14	51457390	51457390	G	A	exonic	Vmn2r89	.	synonymous SNV	Vmn2r89:NM_001378723:exon4:c.G1326A:p.T442T,Vmn2r89:NM_001385186:exon4:c.G1326A:p.T442T,Vmn2r89:NM_009487:exon4:c.G1326A:p.T442T	14qC1
chr14	51457576	51457576	A	T	exonic	Vmn2r89	.	synonymous SNV	Vmn2r89:NM_001378723:exon4:c.A1512T:p.G504G,Vmn2r89:NM_001385186:exon4:c.A1512T:p.G504G,Vmn2r89:NM_009487:exon4:c.A1512T:p.G504G	14qC1
chr14	70586204	70586204	G	T	exonic	Fam160b2	.	nonsynonymous SNV	Fam160b2:NM_194345:exon14:c.C1725A:p.S575R	14qD2
chr14	75727727	75727727	G	A	exonic	Cog3	.	synonymous SNV	Cog3:NM_177381:exon14:c.C1575T:p.A525A	14qD3
chr15	38003911	38003911	C	T	exonic	Ubr5	.	synonymous SNV	Ubr5:NM_001081359:exon32:c.G4101A:p.E1367E,Ubr5:NM_001112721:exon32:c.G4083A:p.E1361E	15qB3.1
chr15	65849861	65849861	G	T	exonic	Efr3a	.	nonsynonymous SNV	Efr3a:NM_001356582:exon11:c.G1144T:p.D382Y,Efr3a:NM_133766:exon11:c.G1252T:p.D418Y	15qD1
chr15	77638007	77638007	A	C	exonic	Apol11b	.	nonsynonymous SNV	Apol11b:NM_001143686:exon3:c.T89G:p.I30R	15qE1
chr15	89456672	89456672	A	G	exonic	Mapk8ip2	.	nonsynonymous SNV	Mapk8ip2:NM_021921:exon3:c.A319G:p.R107G	15qE3
chr15	101487866	101487866	T	C	exonic	Krt83;Krt85	.	nonsynonymous SNV	Krt83:NM_001201323:exon5:c.A847G:p.I283V	15qF2
chr15	101527911	101527911	C	T	exonic	Krt84	.	synonymous SNV	Krt84:NM_008474:exon7:c.G1242A:p.E414E	15qF2
chr15	101527917	101527917	T	C	exonic	Krt84	.	synonymous SNV	Krt84:NM_008474:exon7:c.A1236G:p.K412K	15qF2
chr15	103896013	103896013	C	T	exonic	Mucl2	.	nonsynonymous SNV	Mucl2:NM_009267:exon4:c.G410A:p.R137H	15qF3
chr15	103896015	103896015	T	A	exonic	Mucl2	.	nonsynonymous SNV	Mucl2:NM_009267:exon4:c.A408T:p.Q136H	15qF3
chr15	103896032	103896032	G	C	exonic	Mucl2	.	nonsynonymous SNV	Mucl2:NM_009267:exon4:c.C391G:p.L131V	15qF3
chr15	103896041	103896041	C	T	exonic	Mucl2	.	nonsynonymous SNV	Mucl2:NM_009267:exon4:c.G382A:p.V128I	15qF3
chr15	103896053	103896053	T	C	exonic	Mucl2	.	nonsynonymous SNV	Mucl2:NM_009267:exon4:c.A370G:p.I124V	15qF3
chr15	103897330	103897330	C	T	exonic	Mucl2	.	nonsynonymous SNV	Mucl2:NM_009267:exon3:c.G360A:p.M120I	15qF3
chr15	103897335	103897335	T	C	exonic	Mucl2	.	nonsynonymous SNV	Mucl2:NM_009267:exon3:c.A355G:p.N119D	15qF3
chr15	103897363	103897363	G	T	exonic	Mucl2	.	nonsynonymous SNV	Mucl2:NM_009267:exon3:c.C327A:p.D109E	15qF3
chr16	32751825	32751825	T	C	exonic	Muc4	.	nonsynonymous SNV	Muc4:NM_080457:exon2:c.T1702C:p.S568P	16qB3
chr16	32751851	32751851	G	T	exonic	Muc4	.	nonsynonymous SNV	Muc4:NM_080457:exon2:c.G1728T:p.K576N	16qB3
chr16	32751885	32751885	A	C	exonic	Muc4	.	nonsynonymous SNV	Muc4:NM_080457:exon2:c.A1762C:p.T588P	16qB3
chr16	32751911	32751911	A	G	exonic	Muc4	.	synonymous SNV	Muc4:NM_080457:exon2:c.A1788G:p.S596S	16qB3
chr16	32751922	32751922	A	G	exonic	Muc4	.	nonsynonymous SNV	Muc4:NM_080457:exon2:c.A1799G:p.H600R	16qB3
chr16	32751942	32751942	A	T	exonic	Muc4	.	nonsynonymous SNV	Muc4:NM_080457:exon2:c.A1819T:p.T607S	16qB3
chr16	32752220	32752220	C	G	exonic	Muc4	.	nonsynonymous SNV	Muc4:NM_080457:exon2:c.C2097G:p.S699R	16qB3
chr16	32752234	32752234	G	C	exonic	Muc4	.	nonsynonymous SNV	Muc4:NM_080457:exon2:c.G2111C:p.S704T	16qB3
chr16	32752238	32752238	T	G	exonic	Muc4	.	nonsynonymous SNV	Muc4:NM_080457:exon2:c.T2115G:p.N705K	16qB3
chr16	32752253	32752253	C	A	exonic	Muc4	.	synonymous SNV	Muc4:NM_080457:exon2:c.C2130A:p.T710T	16qB3
chr16	32752292	32752292	A	C	exonic	Muc4	.	synonymous SNV	Muc4:NM_080457:exon2:c.A2169C:p.S723S	16qB3
chr16	32752294	32752294	G	C	exonic	Muc4	.	nonsynonymous SNV	Muc4:NM_080457:exon2:c.G2171C:p.R724P	16qB3
chr16	32752302	32752302	A	T	exonic	Muc4	.	nonsynonymous SNV	Muc4:NM_080457:exon2:c.A2179T:p.I727F	16qB3
chr16	32752343	32752343	T	G	exonic	Muc4	.	synonymous SNV	Muc4:NM_080457:exon2:c.T2220G:p.G740G	16qB3
chr16	32752359	32752359	T	C	exonic	Muc4	.	nonsynonymous SNV	Muc4:NM_080457:exon2:c.T2236C:p.Y746H	16qB3
chr16	32752369	32752369	T	A	exonic	Muc4	.	nonsynonymous SNV	Muc4:NM_080457:exon2:c.T2246A:p.I749N	16qB3
chr16	32752371	32752371	A	T	exonic	Muc4	.	nonsynonymous SNV	Muc4:NM_080457:exon2:c.A2248T:p.M750L	16qB3
chr16	32752379	32752379	C	T	exonic	Muc4	.	synonymous SNV	Muc4:NM_080457:exon2:c.C2256T:p.S752S	16qB3
chr16	32752384	32752384	C	G	exonic	Muc4	.	nonsynonymous SNV	Muc4:NM_080457:exon2:c.C2261G:p.A754G	16qB3
chr16	32752385	32752385	T	A	exonic	Muc4	.	synonymous SNV	Muc4:NM_080457:exon2:c.T2262A:p.A754A	16qB3
chr16	32752398	32752398	C	A	exonic	Muc4	.	nonsynonymous SNV	Muc4:NM_080457:exon2:c.C2275A:p.H759N	16qB3
chr16	32752420	32752420	C	A	exonic	Muc4	.	nonsynonymous SNV	Muc4:NM_080457:exon2:c.C2297A:p.S766Y	16qB3
chr16	32752441	32752441	A	G	exonic	Muc4	.	nonsynonymous SNV	Muc4:NM_080457:exon2:c.A2318G:p.D773G	16qB3
chr16	32752446	32752446	A	G	exonic	Muc4	.	nonsynonymous SNV	Muc4:NM_080457:exon2:c.A2323G:p.R775G	16qB3
chr16	32752449	32752449	C	T	exonic	Muc4	.	nonsynonymous SNV	Muc4:NM_080457:exon2:c.C2326T:p.H776Y	16qB3
chr16	32752456	32752456	T	C	exonic	Muc4	.	nonsynonymous SNV	Muc4:NM_080457:exon2:c.T2333C:p.I778T	16qB3
chr16	32752462	32752462	T	A	exonic	Muc4	.	nonsynonymous SNV	Muc4:NM_080457:exon2:c.T2339A:p.V780E	16qB3
chr16	32752466	32752466	G	A	exonic	Muc4	.	synonymous SNV	Muc4:NM_080457:exon2:c.G2343A:p.R781R	16qB3
chr16	32752501	32752501	C	T	exonic	Muc4	.	nonsynonymous SNV	Muc4:NM_080457:exon2:c.C2378T:p.S793L	16qB3
chr16	32752533	32752533	A	G	exonic	Muc4	.	nonsynonymous SNV	Muc4:NM_080457:exon2:c.A2410G:p.T804A	16qB3
chr16	32752544	32752544	C	A	exonic	Muc4	.	synonymous SNV	Muc4:NM_080457:exon2:c.C2421A:p.T807T	16qB3
chr16	32752545	32752545	T	A	exonic	Muc4	.	nonsynonymous SNV	Muc4:NM_080457:exon2:c.T2422A:p.S808T	16qB3
chr16	32752555	32752555	T	A	exonic	Muc4	.	nonsynonymous SNV	Muc4:NM_080457:exon2:c.T2432A:p.I811N	16qB3
chr16	32752570	32752570	C	T	exonic	Muc4	.	nonsynonymous SNV	Muc4:NM_080457:exon2:c.C2447T:p.P816L	16qB3
chr16	32752594	32752594	A	T	exonic	Muc4	.	nonsynonymous SNV	Muc4:NM_080457:exon2:c.A2471T:p.K824M	16qB3
chr16	32752601	32752601	C	T	exonic	Muc4	.	synonymous SNV	Muc4:NM_080457:exon2:c.C2478T:p.T826T	16qB3
chr16	32752604	32752604	C	T	exonic	Muc4	.	synonymous SNV	Muc4:NM_080457:exon2:c.C2481T:p.S827S	16qB3
chr16	32752627	32752627	G	C	exonic	Muc4	.	nonsynonymous SNV	Muc4:NM_080457:exon2:c.G2504C:p.S835T	16qB3
chr16	32752637	32752637	A	G	exonic	Muc4	.	synonymous SNV	Muc4:NM_080457:exon2:c.A2514G:p.V838V	16qB3
chr16	32752657	32752657	G	C	exonic	Muc4	.	nonsynonymous SNV	Muc4:NM_080457:exon2:c.G2534C:p.G845A	16qB3
chr16	32752659	32752659	A	T	exonic	Muc4	.	nonsynonymous SNV	Muc4:NM_080457:exon2:c.A2536T:p.T846S	16qB3
chr16	32752665	32752665	G	C	exonic	Muc4	.	nonsynonymous SNV	Muc4:NM_080457:exon2:c.G2542C:p.G848R	16qB3
chr16	32753674	32753674	T	C	exonic	Muc4	.	synonymous SNV	Muc4:NM_080457:exon3:c.T3549C:p.S1183S	16qB3
chr16	32753678	32753678	C	G	exonic	Muc4	.	nonsynonymous SNV	Muc4:NM_080457:exon3:c.C3553G:p.Q1185E	16qB3
chr16	32753718	32753718	C	T	exonic	Muc4	.	nonsynonymous SNV	Muc4:NM_080457:exon3:c.C3593T:p.T1198I	16qB3
chr16	32753719	32753719	A	G	exonic	Muc4	.	synonymous SNV	Muc4:NM_080457:exon3:c.A3594G:p.T1198T	16qB3
chr16	32753764	32753764	C	A	exonic	Muc4	.	synonymous SNV	Muc4:NM_080457:exon3:c.C3639A:p.S1213S	16qB3
chr16	32753770	32753770	C	T	exonic	Muc4	.	synonymous SNV	Muc4:NM_080457:exon3:c.C3645T:p.N1215N	16qB3
chr16	32753802	32753802	T	C	exonic	Muc4	.	nonsynonymous SNV	Muc4:NM_080457:exon3:c.T3677C:p.I1226T	16qB3
chr16	32753823	32753823	C	T	exonic	Muc4	.	nonsynonymous SNV	Muc4:NM_080457:exon3:c.C3698T:p.P1233L	16qB3
chr16	32753848	32753848	G	T	exonic	Muc4	.	nonsynonymous SNV	Muc4:NM_080457:exon3:c.G3723T:p.K1241N	16qB3
chr16	32753849	32753849	G	A	exonic	Muc4	.	nonsynonymous SNV	Muc4:NM_080457:exon3:c.G3724A:p.G1242R	16qB3
chr16	32753859	32753859	C	G	exonic	Muc4	.	nonsynonymous SNV	Muc4:NM_080457:exon3:c.C3734G:p.T1245S	16qB3
chr16	32753863	32753863	T	G	exonic	Muc4	.	nonsynonymous SNV	Muc4:NM_080457:exon3:c.T3738G:p.N1246K	16qB3
chr16	32753864	32753864	C	T	exonic	Muc4	.	nonsynonymous SNV	Muc4:NM_080457:exon3:c.C3739T:p.P1247S	16qB3
chr16	32753880	32753880	C	T	exonic	Muc4	.	nonsynonymous SNV	Muc4:NM_080457:exon3:c.C3755T:p.T1252I	16qB3
chr16	32753881	32753881	C	G	exonic	Muc4	.	synonymous SNV	Muc4:NM_080457:exon3:c.C3756G:p.T1252T	16qB3
chr16	32753886	32753886	A	T	exonic	Muc4	.	nonsynonymous SNV	Muc4:NM_080457:exon3:c.A3761T:p.E1254V	16qB3
chr16	32753887	32753887	G	T	exonic	Muc4	.	nonsynonymous SNV	Muc4:NM_080457:exon3:c.G3762T:p.E1254D	16qB3
chr16	32753888	32753888	G	A	exonic	Muc4	.	nonsynonymous SNV	Muc4:NM_080457:exon3:c.G3763A:p.V1255M	16qB3
chr16	32753895	32753895	C	T	exonic	Muc4	.	nonsynonymous SNV	Muc4:NM_080457:exon3:c.C3770T:p.T1257I	16qB3
chr16	32753901	32753901	C	A	exonic	Muc4	.	nonsynonymous SNV	Muc4:NM_080457:exon3:c.C3776A:p.T1259N	16qB3
chr16	32753916	32753916	C	T	exonic	Muc4	.	nonsynonymous SNV	Muc4:NM_080457:exon3:c.C3791T:p.S1264L	16qB3
chr16	32753917	32753917	A	C	exonic	Muc4	.	synonymous SNV	Muc4:NM_080457:exon3:c.A3792C:p.S1264S	16qB3
chr16	32753919	32753919	G	C	exonic	Muc4	.	nonsynonymous SNV	Muc4:NM_080457:exon3:c.G3794C:p.R1265P	16qB3
chr16	32753927	32753927	A	T	exonic	Muc4	.	nonsynonymous SNV	Muc4:NM_080457:exon3:c.A3802T:p.I1268F	16qB3
chr16	32753930	32753930	C	G	exonic	Muc4	.	nonsynonymous SNV	Muc4:NM_080457:exon3:c.C3805G:p.Q1269E	16qB3
chr16	32753938	32753938	G	A	exonic	Muc4	.	synonymous SNV	Muc4:NM_080457:exon3:c.G3813A:p.E1271E	16qB3
chr16	32753946	32753946	C	T	exonic	Muc4	.	nonsynonymous SNV	Muc4:NM_080457:exon3:c.C3821T:p.S1274F	16qB3
chr16	32753955	32753955	C	A	exonic	Muc4	.	nonsynonymous SNV	Muc4:NM_080457:exon3:c.C3830A:p.T1277K	16qB3
chr16	32753963	32753963	C	T	exonic	Muc4	.	nonsynonymous SNV	Muc4:NM_080457:exon3:c.C3838T:p.P1280S	16qB3
chr16	32753968	32753968	T	G	exonic	Muc4	.	synonymous SNV	Muc4:NM_080457:exon3:c.T3843G:p.G1281G	16qB3
chr16	32753990	32753990	C	T	exonic	Muc4	.	nonsynonymous SNV	Muc4:NM_080457:exon3:c.C3865T:p.P1289S	16qB3
chr16	32753994	32753994	T	0	exonic	Muc4	.	.	.	16qB3
chr16	32753994	32753994	T	G	exonic	Muc4	.	nonsynonymous SNV	Muc4:NM_080457:exon3:c.T3869G:p.I1290S	16qB3
chr16	32753996	32753996	A	0	exonic	Muc4	.	.	.	16qB3
chr16	32753996	32753996	A	T	exonic	Muc4	.	nonsynonymous SNV	Muc4:NM_080457:exon3:c.A3871T:p.M1291L	16qB3
chr16	32754004	32754004	C	0	exonic	Muc4	.	.	.	16qB3
chr16	32754004	32754004	C	T	exonic	Muc4	.	synonymous SNV	Muc4:NM_080457:exon3:c.C3879T:p.S1293S	16qB3
chr16	32754009	32754009	C	0	exonic	Muc4	.	.	.	16qB3
chr16	32754009	32754009	C	G	exonic	Muc4	.	nonsynonymous SNV	Muc4:NM_080457:exon3:c.C3884G:p.A1295G	16qB3
chr16	32754010	32754010	T	0	exonic	Muc4	.	.	.	16qB3
chr16	32754010	32754010	T	A	exonic	Muc4	.	synonymous SNV	Muc4:NM_080457:exon3:c.T3885A:p.A1295A	16qB3
chr16	32754023	32754023	C	0	exonic	Muc4	.	.	.	16qB3
chr16	32754023	32754023	C	A	exonic	Muc4	.	nonsynonymous SNV	Muc4:NM_080457:exon3:c.C3898A:p.H1300N	16qB3
chr16	32754032	32754032	T	0	exonic	Muc4	.	.	.	16qB3
chr16	32754032	32754032	T	A	exonic	Muc4	.	nonsynonymous SNV	Muc4:NM_080457:exon3:c.T3907A:p.S1303T	16qB3
chr16	32754045	32754045	C	0	exonic	Muc4	.	.	.	16qB3
chr16	32754045	32754045	C	A	exonic	Muc4	.	nonsynonymous SNV	Muc4:NM_080457:exon3:c.C3920A:p.S1307Y	16qB3
chr16	32754066	32754066	A	0	exonic	Muc4	.	.	.	16qB3
chr16	32754066	32754066	A	G	exonic	Muc4	.	nonsynonymous SNV	Muc4:NM_080457:exon3:c.A3941G:p.D1314G	16qB3
chr16	32754071	32754071	A	0	exonic	Muc4	.	.	.	16qB3
chr16	32754071	32754071	A	G	exonic	Muc4	.	nonsynonymous SNV	Muc4:NM_080457:exon3:c.A3946G:p.R1316G	16qB3
chr16	32754087	32754087	G	0	exonic	Muc4	.	.	.	16qB3
chr16	32754087	32754087	G	A	exonic	Muc4	.	nonsynonymous SNV	Muc4:NM_080457:exon3:c.G3962A:p.G1321E	16qB3
chr16	32754091	32754091	G	0	exonic	Muc4	.	.	.	16qB3
chr16	32754091	32754091	G	A	exonic	Muc4	.	synonymous SNV	Muc4:NM_080457:exon3:c.G3966A:p.R1322R	16qB3
chr16	32754333	32754333	T	A	exonic	Muc4	.	synonymous SNV	Muc4:NM_080457:exon4:c.T4206A:p.A1402A	16qB3
chr16	32754393	32754393	G	T	exonic	Muc4	.	nonsynonymous SNV	Muc4:NM_080457:exon4:c.G4266T:p.K1422N	16qB3
chr16	32754394	32754394	G	A	exonic	Muc4	.	nonsynonymous SNV	Muc4:NM_080457:exon4:c.G4267A:p.G1423R	16qB3
chr16	32754425	32754425	A	T	exonic	Muc4	.	nonsynonymous SNV	Muc4:NM_080457:exon4:c.A4298T:p.N1433I	16qB3
chr16	32754426	32754426	T	C	exonic	Muc4	.	synonymous SNV	Muc4:NM_080457:exon4:c.T4299C:p.N1433N	16qB3
chr16	32754427	32754427	G	C	exonic	Muc4	.	nonsynonymous SNV	Muc4:NM_080457:exon4:c.G4300C:p.A1434P	16qB3
chr16	32754829	32754829	T	A	exonic	Muc4	.	nonsynonymous SNV	Muc4:NM_080457:exon4:c.T4702A:p.S1568T	16qB3
chr16	32754834	32754834	C	A	exonic	Muc4	.	synonymous SNV	Muc4:NM_080457:exon4:c.C4707A:p.S1569S	16qB3
chr16	32754880	32754880	C	T	exonic	Muc4	.	nonsynonymous SNV	Muc4:NM_080457:exon4:c.C4753T:p.P1585S	16qB3
chr16	32754885	32754885	C	T	exonic	Muc4	.	synonymous SNV	Muc4:NM_080457:exon4:c.C4758T:p.G1586G	16qB3
chr16	32754963	32754963	T	C	exonic	Muc4	.	synonymous SNV	Muc4:NM_080457:exon4:c.T4836C:p.S1612S	16qB3
chr16	32754967	32754967	C	G	exonic	Muc4	.	nonsynonymous SNV	Muc4:NM_080457:exon4:c.C4840G:p.Q1614E	16qB3
chr16	32755007	32755007	C	T	exonic	Muc4	.	nonsynonymous SNV	Muc4:NM_080457:exon4:c.C4880T:p.T1627I	16qB3
chr16	32755008	32755008	A	G	exonic	Muc4	.	synonymous SNV	Muc4:NM_080457:exon4:c.A4881G:p.T1627T	16qB3
chr16	32755676	32755676	C	G	exonic	Muc4	.	nonsynonymous SNV	Muc4:NM_080457:exon4:c.C5549G:p.A1850G	16qB3
chr16	32755677	32755677	T	A	exonic	Muc4	.	synonymous SNV	Muc4:NM_080457:exon4:c.T5550A:p.A1850A	16qB3
chr16	32755684	32755684	T	A	exonic	Muc4	.	nonsynonymous SNV	Muc4:NM_080457:exon4:c.T5557A:p.S1853T	16qB3
chr16	32755690	32755690	C	A	exonic	Muc4	.	nonsynonymous SNV	Muc4:NM_080457:exon4:c.C5563A:p.H1855N	16qB3
chr16	32755699	32755699	T	A	exonic	Muc4	.	nonsynonymous SNV	Muc4:NM_080457:exon4:c.T5572A:p.S1858T	16qB3
chr16	32755703	32755703	C	G	exonic	Muc4	.	nonsynonymous SNV	Muc4:NM_080457:exon4:c.C5576G:p.T1859R	16qB3
chr16	32755705	32755705	G	A	exonic	Muc4	.	nonsynonymous SNV	Muc4:NM_080457:exon4:c.G5578A:p.A1860T	16qB3
chr16	32755717	32755717	G	C	exonic	Muc4	.	nonsynonymous SNV	Muc4:NM_080457:exon4:c.G5590C:p.E1864Q	16qB3
chr16	32755721	32755721	T	G	exonic	Muc4	.	nonsynonymous SNV	Muc4:NM_080457:exon4:c.T5594G:p.I1865S	16qB3
chr16	32755792	32755792	A	T	exonic	Muc4	.	nonsynonymous SNV	Muc4:NM_080457:exon4:c.A5665T:p.T1889S	16qB3
chr16	32755805	32755805	C	T	exonic	Muc4	.	nonsynonymous SNV	Muc4:NM_080457:exon4:c.C5678T:p.S1893L	16qB3
chr16	32755843	32755843	T	G	exonic	Muc4	.	nonsynonymous SNV	Muc4:NM_080457:exon4:c.T5716G:p.S1906A	16qB3
chr16	32755857	32755857	G	C	exonic	Muc4	.	nonsynonymous SNV	Muc4:NM_080457:exon4:c.G5730C:p.L1910F	16qB3
chr16	32755861	32755861	C	A	exonic	Muc4	.	nonsynonymous SNV	Muc4:NM_080457:exon4:c.C5734A:p.P1912T	16qB3
chr16	32755886	32755886	A	G	exonic	Muc4	.	nonsynonymous SNV	Muc4:NM_080457:exon4:c.A5759G:p.E1920G	16qB3
chr16	32755889	32755889	A	G	exonic	Muc4	.	nonsynonymous SNV	Muc4:NM_080457:exon4:c.A5762G:p.N1921S	16qB3
chr16	36772445	36772445	A	G	exonic	Slc15a2	.	nonsynonymous SNV	Slc15a2:NM_001145899:exon6:c.T629C:p.M210T,Slc15a2:NM_021301:exon6:c.T629C:p.M210T	16qB3
chr16	79001868	79001868	G	A	exonic	Tmprss15	.	nonsynonymous SNV	Tmprss15:NM_178855:exon18:c.C1880T:p.T627I,Tmprss15:NM_008941:exon19:c.C1925T:p.T642I	16qC3.1
chr16	98010801	98010801	A	G	exonic	B230307C23Rik	.	nonsynonymous SNV	B230307C23Rik:NM_001362093:exon4:c.A874G:p.R292G	16qC4
chr16	98010960	98010960	A	G	exonic	B230307C23Rik	.	nonsynonymous SNV	B230307C23Rik:NM_001362093:exon4:c.A1033G:p.I345V	16qC4
chr16	98010982	98010982	T	A	exonic	B230307C23Rik	.	nonsynonymous SNV	B230307C23Rik:NM_001362093:exon4:c.T1055A:p.F352Y	16qC4
chr16	98011005	98011005	A	G	exonic	B230307C23Rik	.	nonsynonymous SNV	B230307C23Rik:NM_001362093:exon4:c.A1078G:p.T360A	16qC4
chr16	98011095	98011095	G	A	exonic	B230307C23Rik	.	nonsynonymous SNV	B230307C23Rik:NM_001362093:exon4:c.G1168A:p.A390T	16qC4
chr16	98011115	98011115	A	C	exonic	B230307C23Rik	.	nonsynonymous SNV	B230307C23Rik:NM_001362093:exon4:c.A1188C:p.Q396H	16qC4
chr16	98011117	98011117	G	T	exonic	B230307C23Rik	.	nonsynonymous SNV	B230307C23Rik:NM_001362093:exon4:c.G1190T:p.S397I	16qC4
chr16	98011154	98011154	G	A	exonic	B230307C23Rik	.	synonymous SNV	B230307C23Rik:NM_001362093:exon4:c.G1227A:p.K409K	16qC4
chr16	98011159	98011159	T	A	exonic	B230307C23Rik	.	nonsynonymous SNV	B230307C23Rik:NM_001362093:exon4:c.T1232A:p.I411N	16qC4
chr16	98011192	98011192	G	C	exonic	B230307C23Rik	.	nonsynonymous SNV	B230307C23Rik:NM_001362093:exon4:c.G1265C:p.S422T	16qC4
chr16	98011201	98011201	G	T	exonic	B230307C23Rik	.	nonsynonymous SNV	B230307C23Rik:NM_001362093:exon4:c.G1274T:p.G425V	16qC4
chr16	98011207	98011207	A	G	exonic	B230307C23Rik	.	nonsynonymous SNV	B230307C23Rik:NM_001362093:exon4:c.A1280G:p.K427R	16qC4
chr16	98011228	98011228	A	T	exonic	B230307C23Rik	.	nonsynonymous SNV	B230307C23Rik:NM_001362093:exon4:c.A1301T:p.K434I	16qC4
chr16	98011298	98011298	T	A	exonic	B230307C23Rik	.	synonymous SNV	B230307C23Rik:NM_001362093:exon4:c.T1371A:p.I457I	16qC4
chr16	98011373	98011373	C	T	exonic	B230307C23Rik	.	synonymous SNV	B230307C23Rik:NM_001362093:exon4:c.C1446T:p.H482H	16qC4
chr16	98011674	98011674	A	G	exonic	B230307C23Rik	.	nonsynonymous SNV	B230307C23Rik:NM_001362093:exon4:c.A1747G:p.S583G	16qC4
chr16	98011909	98011909	G	A	exonic	B230307C23Rik	.	nonsynonymous SNV	B230307C23Rik:NM_001362093:exon4:c.G1982A:p.C661Y	16qC4
chr16	98011917	98011917	G	A	exonic	B230307C23Rik	.	nonsynonymous SNV	B230307C23Rik:NM_001362093:exon4:c.G1990A:p.D664N	16qC4
chr16	98011928	98011928	T	C	exonic	B230307C23Rik	.	synonymous SNV	B230307C23Rik:NM_001362093:exon4:c.T2001C:p.G667G	16qC4
chr16	98011934	98011934	A	C	exonic	B230307C23Rik	.	synonymous SNV	B230307C23Rik:NM_001362093:exon4:c.A2007C:p.A669A	16qC4
chr16	98011949	98011949	T	A	exonic	B230307C23Rik	.	nonsynonymous SNV	B230307C23Rik:NM_001362093:exon4:c.T2022A:p.S674R	16qC4
chr16	98011957	98011957	G	A	exonic	B230307C23Rik	.	nonsynonymous SNV	B230307C23Rik:NM_001362093:exon4:c.G2030A:p.R677H	16qC4
chr16	98011958	98011958	T	A	exonic	B230307C23Rik	.	synonymous SNV	B230307C23Rik:NM_001362093:exon4:c.T2031A:p.R677R	16qC4
chr16	98011966	98011966	A	G	exonic	B230307C23Rik	.	nonsynonymous SNV	B230307C23Rik:NM_001362093:exon4:c.A2039G:p.K680R	16qC4
chr17	17039837	17039837	G	A	exonic	Gm51425	.	synonymous SNV	Gm51425:NM_001374002:exon4:c.G1059A:p.E353E,Gm51425:NM_001374000:exon5:c.G936A:p.E312E	17qA3.1
chr17	17040056	17040056	T	A	exonic	Gm51425	.	nonsynonymous SNV	Gm51425:NM_001374002:exon4:c.T1278A:p.H426Q,Gm51425:NM_001374000:exon5:c.T1155A:p.H385Q	17qA3.1
chr17	17040233	17040233	T	A	exonic	Gm51425	.	synonymous SNV	Gm51425:NM_001374002:exon4:c.T1455A:p.T485T,Gm51425:NM_001374000:exon5:c.T1332A:p.T444T	17qA3.1
chr17	17040284	17040284	C	T	exonic	Gm51425	.	synonymous SNV	Gm51425:NM_001374002:exon4:c.C1506T:p.G502G,Gm51425:NM_001374000:exon5:c.C1383T:p.G461G	17qA3.1
chr17	17040388	17040388	G	A	exonic	Gm51425	.	nonsynonymous SNV	Gm51425:NM_001374002:exon4:c.G1610A:p.R537K,Gm51425:NM_001374000:exon5:c.G1487A:p.R496K	17qA3.1
chr17	17040393	17040393	C	T	exonic	Gm51425	.	nonsynonymous SNV	Gm51425:NM_001374002:exon4:c.C1615T:p.L539F,Gm51425:NM_001374000:exon5:c.C1492T:p.L498F	17qA3.1
chr17	19677541	19677541	G	T	exonic	Vmn2r102	.	nonsynonymous SNV	Vmn2r102:NM_001104564:exon3:c.G817T:p.V273F	17qA3.2
chr17	22689871	22689871	A	G	exonic	Gm9805	.	nonsynonymous SNV	Gm9805:NM_001362121:exon5:c.A1127G:p.Y376C,Gm9805:NM_001377043:exon5:c.A1127G:p.Y376C	17qA3.3
chr17	23290950	23290950	C	T	exonic	Vmn2r114	.	nonsynonymous SNV	Vmn2r114:NM_001102584:exon6:c.G2555A:p.R852H	17qA3.3
chr17	23290965	23290965	G	A	exonic	Vmn2r114	.	nonsynonymous SNV	Vmn2r114:NM_001102584:exon6:c.C2540T:p.A847V	17qA3.3
chr17	23290983	23290983	G	T	exonic	Vmn2r114	.	nonsynonymous SNV	Vmn2r114:NM_001102584:exon6:c.C2522A:p.S841Y	17qA3.3
chr17	23291056	23291056	A	T	exonic	Vmn2r114	.	nonsynonymous SNV	Vmn2r114:NM_001102584:exon6:c.T2449A:p.S817T	17qA3.3
chr17	23291064	23291064	A	G	exonic	Vmn2r114	.	nonsynonymous SNV	Vmn2r114:NM_001102584:exon6:c.T2441C:p.I814T	17qA3.3
chr17	23291078	23291078	C	T	exonic	Vmn2r114	.	synonymous SNV	Vmn2r114:NM_001102584:exon6:c.G2427A:p.V809V	17qA3.3
chr17	23291094	23291094	C	T	exonic	Vmn2r114	.	nonsynonymous SNV	Vmn2r114:NM_001102584:exon6:c.G2411A:p.R804K	17qA3.3
chr17	23291106	23291106	C	T	exonic	Vmn2r114	.	nonsynonymous SNV	Vmn2r114:NM_001102584:exon6:c.G2399A:p.S800N	17qA3.3
chr17	23291120	23291120	G	T	exonic	Vmn2r114	.	synonymous SNV	Vmn2r114:NM_001102584:exon6:c.C2385A:p.I795I	17qA3.3
chr17	23291129	23291129	G	A	exonic	Vmn2r114	.	synonymous SNV	Vmn2r114:NM_001102584:exon6:c.C2376T:p.V792V	17qA3.3
chr17	23291150	23291150	C	A	exonic	Vmn2r114	.	synonymous SNV	Vmn2r114:NM_001102584:exon6:c.G2355T:p.L785L	17qA3.3
chr17	23291197	23291197	G	A	exonic	Vmn2r114	.	nonsynonymous SNV	Vmn2r114:NM_001102584:exon6:c.C2308T:p.L770F	17qA3.3
chr17	23291281	23291281	A	T	exonic	Vmn2r114	.	nonsynonymous SNV	Vmn2r114:NM_001102584:exon6:c.T2224A:p.S742T	17qA3.3
chr17	23291283	23291283	C	T	exonic	Vmn2r114	.	nonsynonymous SNV	Vmn2r114:NM_001102584:exon6:c.G2222A:p.G741D	17qA3.3
chr17	23291285	23291285	T	C	exonic	Vmn2r114	.	synonymous SNV	Vmn2r114:NM_001102584:exon6:c.A2220G:p.K740K	17qA3.3
chr17	23291321	23291321	A	C	exonic	Vmn2r114	.	nonsynonymous SNV	Vmn2r114:NM_001102584:exon6:c.T2184G:p.H728Q	17qA3.3
chr17	23291322	23291322	T	A	exonic	Vmn2r114	.	nonsynonymous SNV	Vmn2r114:NM_001102584:exon6:c.A2183T:p.H728L	17qA3.3
chr17	23291338	23291338	C	A	exonic	Vmn2r114	.	nonsynonymous SNV	Vmn2r114:NM_001102584:exon6:c.G2167T:p.V723F	17qA3.3
chr17	23291353	23291353	C	G	exonic	Vmn2r114	.	nonsynonymous SNV	Vmn2r114:NM_001102584:exon6:c.G2152C:p.A718P	17qA3.3
chr17	23291365	23291365	C	T	exonic	Vmn2r114	.	nonsynonymous SNV	Vmn2r114:NM_001102584:exon6:c.G2140A:p.V714I	17qA3.3
chr17	23291369	23291369	A	T	exonic	Vmn2r114	.	stopgain	Vmn2r114:NM_001102584:exon6:c.T2136A:p.C712X	17qA3.3
chr17	23291398	23291398	A	T	exonic	Vmn2r114	.	nonsynonymous SNV	Vmn2r114:NM_001102584:exon6:c.T2107A:p.F703I	17qA3.3
chr17	23291530	23291530	C	T	exonic	Vmn2r114	.	nonsynonymous SNV	Vmn2r114:NM_001102584:exon6:c.G1975A:p.V659I	17qA3.3
chr17	23291539	23291539	T	C	exonic	Vmn2r114	.	nonsynonymous SNV	Vmn2r114:NM_001102584:exon6:c.A1966G:p.T656A	17qA3.3
chr17	23291609	23291609	A	G	exonic	Vmn2r114	.	synonymous SNV	Vmn2r114:NM_001102584:exon6:c.T1896C:p.I632I	17qA3.3
chr17	23291645	23291645	G	C	exonic	Vmn2r114	.	nonsynonymous SNV	Vmn2r114:NM_001102584:exon6:c.C1860G:p.N620K	17qA3.3
chr17	23291665	23291665	G	A	exonic	Vmn2r114	.	nonsynonymous SNV	Vmn2r114:NM_001102584:exon6:c.C1840T:p.P614S	17qA3.3
chr17	23291782	23291782	T	C	exonic	Vmn2r114	.	nonsynonymous SNV	Vmn2r114:NM_001102584:exon6:c.A1723G:p.T575A	17qA3.3
chr17	23291787	23291787	C	T	exonic	Vmn2r114	.	nonsynonymous SNV	Vmn2r114:NM_001102584:exon6:c.G1718A:p.R573H	17qA3.3
chr17	23291807	23291807	T	A	exonic	Vmn2r114	.	synonymous SNV	Vmn2r114:NM_001102584:exon6:c.A1698T:p.T566T	17qA3.3
chr17	23291821	23291821	G	T	exonic	Vmn2r114	.	nonsynonymous SNV	Vmn2r114:NM_001102584:exon6:c.C1684A:p.Q562K	17qA3.3
chr17	23291829	23291829	A	G	exonic	Vmn2r114	.	nonsynonymous SNV	Vmn2r114:NM_001102584:exon6:c.T1676C:p.L559P	17qA3.3
chr17	23291838	23291838	A	G	exonic	Vmn2r114	.	nonsynonymous SNV	Vmn2r114:NM_001102584:exon6:c.T1667C:p.V556A	17qA3.3
chr17	23291839	23291839	C	A	exonic	Vmn2r114	.	nonsynonymous SNV	Vmn2r114:NM_001102584:exon6:c.G1666T:p.V556F	17qA3.3
chr17	23291841	23291841	C	A	exonic	Vmn2r114	.	nonsynonymous SNV	Vmn2r114:NM_001102584:exon6:c.G1664T:p.C555F	17qA3.3
chr17	23308035	23308035	C	T	exonic	Vmn2r114	.	nonsynonymous SNV	Vmn2r114:NM_001102584:exon4:c.G1522A:p.A508T	17qA3.3
chr17	23308041	23308041	C	A	exonic	Vmn2r114	.	stopgain	Vmn2r114:NM_001102584:exon4:c.G1516T:p.G506X	17qA3.3
chr17	23308078	23308078	T	C	exonic	Vmn2r114	.	synonymous SNV	Vmn2r114:NM_001102584:exon4:c.A1479G:p.Q493Q	17qA3.3
chr17	23308096	23308096	G	A	exonic	Vmn2r114	.	synonymous SNV	Vmn2r114:NM_001102584:exon4:c.C1461T:p.Y487Y	17qA3.3
chr17	23308117	23308117	T	G	exonic	Vmn2r114	.	nonsynonymous SNV	Vmn2r114:NM_001102584:exon4:c.A1440C:p.K480N	17qA3.3
chr17	23308130	23308130	T	C	exonic	Vmn2r114	.	nonsynonymous SNV	Vmn2r114:NM_001102584:exon4:c.A1427G:p.E476G	17qA3.3
chr17	23308175	23308175	T	A	exonic	Vmn2r114	.	nonsynonymous SNV	Vmn2r114:NM_001102584:exon4:c.A1382T:p.E461V	17qA3.3
chr17	23308177	23308177	C	T	exonic	Vmn2r114	.	synonymous SNV	Vmn2r114:NM_001102584:exon4:c.G1380A:p.Q460Q	17qA3.3
chr17	23308202	23308202	T	C	exonic	Vmn2r114	.	nonsynonymous SNV	Vmn2r114:NM_001102584:exon4:c.A1355G:p.N452S	17qA3.3
chr17	23308209	23308209	T	A	exonic	Vmn2r114	.	stopgain	Vmn2r114:NM_001102584:exon4:c.A1348T:p.R450X	17qA3.3
chr17	23308219	23308219	C	A	exonic	Vmn2r114	.	synonymous SNV	Vmn2r114:NM_001102584:exon4:c.G1338T:p.P446P	17qA3.3
chr17	23308231	23308231	C	G	exonic	Vmn2r114	.	nonsynonymous SNV	Vmn2r114:NM_001102584:exon4:c.G1326C:p.Q442H	17qA3.3
chr17	23308234	23308234	G	A	exonic	Vmn2r114	.	synonymous SNV	Vmn2r114:NM_001102584:exon4:c.C1323T:p.T441T	17qA3.3
chr17	23308250	23308250	G	A	exonic	Vmn2r114	.	nonsynonymous SNV	Vmn2r114:NM_001102584:exon4:c.C1307T:p.S436F	17qA3.3
chr17	23311032	23311032	G	A	exonic	Vmn2r114	.	nonsynonymous SNV	Vmn2r114:NM_001102584:exon2:c.C400T:p.L134F	17qA3.3
chr17	23311042	23311042	C	G	exonic	Vmn2r114	.	nonsynonymous SNV	Vmn2r114:NM_001102584:exon2:c.G390C:p.M130I	17qA3.3
chr17	23311052	23311052	G	A	exonic	Vmn2r114	.	nonsynonymous SNV	Vmn2r114:NM_001102584:exon2:c.C380T:p.P127L	17qA3.3
chr17	23311071	23311071	G	A	exonic	Vmn2r114	.	stopgain	Vmn2r114:NM_001102584:exon2:c.C361T:p.Q121X	17qA3.3
chr17	23311081	23311081	G	A	exonic	Vmn2r114	.	synonymous SNV	Vmn2r114:NM_001102584:exon2:c.C351T:p.H117H	17qA3.3
chr17	23311125	23311125	T	C	exonic	Vmn2r114	.	nonsynonymous SNV	Vmn2r114:NM_001102584:exon2:c.A307G:p.K103E	17qA3.3
chr17	23311126	23311126	G	T	exonic	Vmn2r114	.	synonymous SNV	Vmn2r114:NM_001102584:exon2:c.C306A:p.S102S	17qA3.3
chr17	23311131	23311131	T	G	exonic	Vmn2r114	.	nonsynonymous SNV	Vmn2r114:NM_001102584:exon2:c.A301C:p.I101L	17qA3.3
chr17	23311139	23311139	C	A	exonic	Vmn2r114	.	nonsynonymous SNV	Vmn2r114:NM_001102584:exon2:c.G293T:p.R98I	17qA3.3
chr17	23311143	23311143	C	G	exonic	Vmn2r114	.	nonsynonymous SNV	Vmn2r114:NM_001102584:exon2:c.G289C:p.V97L	17qA3.3
chr17	23311171	23311171	T	C	exonic	Vmn2r114	.	synonymous SNV	Vmn2r114:NM_001102584:exon2:c.A261G:p.R87R	17qA3.3
chr17	23311180	23311180	T	C	exonic	Vmn2r114	.	synonymous SNV	Vmn2r114:NM_001102584:exon2:c.A252G:p.E84E	17qA3.3
chr17	23311208	23311208	A	G	exonic	Vmn2r114	.	nonsynonymous SNV	Vmn2r114:NM_001102584:exon2:c.T224C:p.V75A	17qA3.3
chr17	23311212	23311212	T	A	exonic	Vmn2r114	.	nonsynonymous SNV	Vmn2r114:NM_001102584:exon2:c.A220T:p.N74Y	17qA3.3
chr17	23345068	23345068	C	T	exonic	Vmn2r115	.	synonymous SNV	Vmn2r115:NM_001104579:exon2:c.C213T:p.N71N	17qA3.3
chr17	23345115	23345115	T	G	exonic	Vmn2r115	.	nonsynonymous SNV	Vmn2r115:NM_001104579:exon2:c.T260G:p.M87R	17qA3.3
chr17	23345153	23345153	G	A	exonic	Vmn2r115	.	nonsynonymous SNV	Vmn2r115:NM_001104579:exon2:c.G298A:p.E100K	17qA3.3
chr17	23345154	23345154	A	C	exonic	Vmn2r115	.	nonsynonymous SNV	Vmn2r115:NM_001104579:exon2:c.A299C:p.E100A	17qA3.3
chr17	23345156	23345156	T	C	exonic	Vmn2r115	.	nonsynonymous SNV	Vmn2r115:NM_001104579:exon2:c.T301C:p.F101L	17qA3.3
chr17	23345163	23345163	T	A	exonic	Vmn2r115	.	nonsynonymous SNV	Vmn2r115:NM_001104579:exon2:c.T308A:p.V103E	17qA3.3
chr17	23345165	23345165	C	T	exonic	Vmn2r115	.	nonsynonymous SNV	Vmn2r115:NM_001104579:exon2:c.C310T:p.H104Y	17qA3.3
chr17	23346117	23346117	A	G	exonic	Vmn2r115	.	nonsynonymous SNV	Vmn2r115:NM_001104579:exon3:c.A977G:p.H326R	17qA3.3
chr17	23346206	23346206	A	T	exonic	Vmn2r115	.	nonsynonymous SNV	Vmn2r115:NM_001104579:exon3:c.A1066T:p.M356L	17qA3.3
chr17	23346227	23346227	T	C	exonic	Vmn2r115	.	nonsynonymous SNV	Vmn2r115:NM_001104579:exon3:c.T1087C:p.S363P	17qA3.3
chr17	23346261	23346261	C	G	exonic	Vmn2r115	.	stopgain	Vmn2r115:NM_001104579:exon3:c.C1121G:p.S374X	17qA3.3
chr17	23346264	23346264	C	T	exonic	Vmn2r115	.	nonsynonymous SNV	Vmn2r115:NM_001104579:exon3:c.C1124T:p.S375F	17qA3.3
chr17	23346265	23346265	C	A	exonic	Vmn2r115	.	synonymous SNV	Vmn2r115:NM_001104579:exon3:c.C1125A:p.S375S	17qA3.3
chr17	23346278	23346278	G	A	exonic	Vmn2r115	.	nonsynonymous SNV	Vmn2r115:NM_001104579:exon3:c.G1138A:p.E380K	17qA3.3
chr17	23346288	23346288	T	C	exonic	Vmn2r115	.	nonsynonymous SNV	Vmn2r115:NM_001104579:exon3:c.T1148C:p.M383T	17qA3.3
chr17	23346339	23346339	A	C	exonic	Vmn2r115	.	nonsynonymous SNV	Vmn2r115:NM_001104579:exon3:c.A1199C:p.N400T	17qA3.3
chr17	23346346	23346346	T	G	exonic	Vmn2r115	.	synonymous SNV	Vmn2r115:NM_001104579:exon3:c.T1206G:p.V402V	17qA3.3
chr17	23346362	23346362	G	A	exonic	Vmn2r115	.	nonsynonymous SNV	Vmn2r115:NM_001104579:exon3:c.G1222A:p.A408T	17qA3.3
chr17	23346371	23346371	C	T	exonic	Vmn2r115	.	stopgain	Vmn2r115:NM_001104579:exon3:c.C1231T:p.Q411X	17qA3.3
chr17	23346372	23346372	A	G	exonic	Vmn2r115	.	nonsynonymous SNV	Vmn2r115:NM_001104579:exon3:c.A1232G:p.Q411R	17qA3.3
chr17	23346389	23346389	T	A	exonic	Vmn2r115	.	nonsynonymous SNV	Vmn2r115:NM_001104579:exon3:c.T1249A:p.F417I	17qA3.3
chr17	23346438	23346438	A	G	exonic	Vmn2r115	.	nonsynonymous SNV	Vmn2r115:NM_001104579:exon3:c.A1298G:p.K433R	17qA3.3
chr17	23347825	23347825	C	T	exonic	Vmn2r115	.	nonsynonymous SNV	Vmn2r115:NM_001104579:exon4:c.C1310T:p.S437F	17qA3.3
chr17	23347841	23347841	C	T	exonic	Vmn2r115	.	synonymous SNV	Vmn2r115:NM_001104579:exon4:c.C1326T:p.T442T	17qA3.3
chr17	23347844	23347844	G	C	exonic	Vmn2r115	.	nonsynonymous SNV	Vmn2r115:NM_001104579:exon4:c.G1329C:p.Q443H	17qA3.3
chr17	23347849	23347849	T	C	exonic	Vmn2r115	.	nonsynonymous SNV	Vmn2r115:NM_001104579:exon4:c.T1334C:p.I445T	17qA3.3
chr17	23347866	23347866	A	T	exonic	Vmn2r115	.	stopgain	Vmn2r115:NM_001104579:exon4:c.A1351T:p.R451X	17qA3.3
chr17	23347873	23347873	A	G	exonic	Vmn2r115	.	nonsynonymous SNV	Vmn2r115:NM_001104579:exon4:c.A1358G:p.N453S	17qA3.3
chr17	23347898	23347898	G	A	exonic	Vmn2r115	.	synonymous SNV	Vmn2r115:NM_001104579:exon4:c.G1383A:p.Q461Q	17qA3.3
chr17	23347900	23347900	A	T	exonic	Vmn2r115	.	nonsynonymous SNV	Vmn2r115:NM_001104579:exon4:c.A1385T:p.E462V	17qA3.3
chr17	23347937	23347937	T	G	exonic	Vmn2r115	.	nonsynonymous SNV	Vmn2r115:NM_001104579:exon4:c.T1422G:p.H474Q	17qA3.3
chr17	23347947	23347947	T	C	exonic	Vmn2r115	.	nonsynonymous SNV	Vmn2r115:NM_001104579:exon4:c.T1432C:p.F478L	17qA3.3
chr17	23347951	23347951	A	G	exonic	Vmn2r115	.	nonsynonymous SNV	Vmn2r115:NM_001104579:exon4:c.A1436G:p.K479R	17qA3.3
chr17	23347958	23347958	A	C	exonic	Vmn2r115	.	nonsynonymous SNV	Vmn2r115:NM_001104579:exon4:c.A1443C:p.K481N	17qA3.3
chr17	23347964	23347964	G	A	exonic	Vmn2r115	.	synonymous SNV	Vmn2r115:NM_001104579:exon4:c.G1449A:p.G483G	17qA3.3
chr17	23347967	23347967	A	G	exonic	Vmn2r115	.	nonsynonymous SNV	Vmn2r115:NM_001104579:exon4:c.A1452G:p.I484M	17qA3.3
chr17	23348005	23348005	T	C	exonic	Vmn2r115	.	nonsynonymous SNV	Vmn2r115:NM_001104579:exon4:c.T1490C:p.L497S	17qA3.3
chr17	23348034	23348034	G	T	exonic	Vmn2r115	.	stopgain	Vmn2r115:NM_001104579:exon4:c.G1519T:p.G507X	17qA3.3
chr17	23348040	23348040	G	A	exonic	Vmn2r115	.	nonsynonymous SNV	Vmn2r115:NM_001104579:exon4:c.G1525A:p.A509T	17qA3.3
chr17	23356960	23356960	A	G	exonic	Vmn2r115	.	nonsynonymous SNV	Vmn2r115:NM_001104579:exon5:c.A1531G:p.M511V	17qA3.3
chr17	23356971	23356971	A	G	exonic	Vmn2r115	.	synonymous SNV	Vmn2r115:NM_001104579:exon5:c.A1542G:p.S514S	17qA3.3
chr17	23357019	23357019	C	T	exonic	Vmn2r115	.	synonymous SNV	Vmn2r115:NM_001104579:exon5:c.C1590T:p.D530D	17qA3.3
chr17	23357055	23357055	T	C	exonic	Vmn2r115	.	synonymous SNV	Vmn2r115:NM_001104579:exon5:c.T1626C:p.C542C	17qA3.3
chr17	23357076	23357076	C	T	exonic	Vmn2r115	.	synonymous SNV	Vmn2r115:NM_001104579:exon5:c.C1647T:p.N549N	17qA3.3
chr17	23359221	23359221	G	T	exonic	Vmn2r115	.	nonsynonymous SNV	Vmn2r115:NM_001104579:exon6:c.G1667T:p.C556F	17qA3.3
chr17	23359223	23359223	G	T	exonic	Vmn2r115	.	nonsynonymous SNV	Vmn2r115:NM_001104579:exon6:c.G1669T:p.V557F	17qA3.3
chr17	23359224	23359224	T	C	exonic	Vmn2r115	.	nonsynonymous SNV	Vmn2r115:NM_001104579:exon6:c.T1670C:p.V557A	17qA3.3
chr17	23359233	23359233	T	C	exonic	Vmn2r115	.	nonsynonymous SNV	Vmn2r115:NM_001104579:exon6:c.T1679C:p.L560P	17qA3.3
chr17	23359241	23359241	C	A	exonic	Vmn2r115	.	nonsynonymous SNV	Vmn2r115:NM_001104579:exon6:c.C1687A:p.Q563K	17qA3.3
chr17	23359255	23359255	A	T	exonic	Vmn2r115	.	synonymous SNV	Vmn2r115:NM_001104579:exon6:c.A1701T:p.T567T	17qA3.3
chr17	23359275	23359275	G	A	exonic	Vmn2r115	.	nonsynonymous SNV	Vmn2r115:NM_001104579:exon6:c.G1721A:p.R574H	17qA3.3
chr17	23359280	23359280	A	G	exonic	Vmn2r115	.	nonsynonymous SNV	Vmn2r115:NM_001104579:exon6:c.A1726G:p.I576V	17qA3.3
chr17	23359281	23359281	T	C	exonic	Vmn2r115	.	nonsynonymous SNV	Vmn2r115:NM_001104579:exon6:c.T1727C:p.I576T	17qA3.3
chr17	23359297	23359297	C	T	exonic	Vmn2r115	.	synonymous SNV	Vmn2r115:NM_001104579:exon6:c.C1743T:p.S581S	17qA3.3
chr17	23359307	23359307	C	T	exonic	Vmn2r115	.	nonsynonymous SNV	Vmn2r115:NM_001104579:exon6:c.C1753T:p.P585S	17qA3.3
chr17	23359310	23359310	T	C	exonic	Vmn2r115	.	synonymous SNV	Vmn2r115:NM_001104579:exon6:c.T1756C:p.L586L	17qA3.3
chr17	23359315	23359315	G	T	exonic	Vmn2r115	.	synonymous SNV	Vmn2r115:NM_001104579:exon6:c.G1761T:p.G587G	17qA3.3
chr17	23359326	23359326	C	T	exonic	Vmn2r115	.	nonsynonymous SNV	Vmn2r115:NM_001104579:exon6:c.C1772T:p.S591F	17qA3.3
chr17	23359349	23359349	G	T	exonic	Vmn2r115	.	nonsynonymous SNV	Vmn2r115:NM_001104579:exon6:c.G1795T:p.A599S	17qA3.3
chr17	23359359	23359359	T	C	exonic	Vmn2r115	.	nonsynonymous SNV	Vmn2r115:NM_001104579:exon6:c.T1805C:p.I602T	17qA3.3
chr17	23359397	23359397	C	T	exonic	Vmn2r115	.	nonsynonymous SNV	Vmn2r115:NM_001104579:exon6:c.C1843T:p.P615S	17qA3.3
chr17	23359417	23359417	C	G	exonic	Vmn2r115	.	nonsynonymous SNV	Vmn2r115:NM_001104579:exon6:c.C1863G:p.N621K	17qA3.3
chr17	23359450	23359450	A	C	exonic	Vmn2r115	.	synonymous SNV	Vmn2r115:NM_001104579:exon6:c.A1896C:p.L632L	17qA3.3
chr17	23359533	23359533	T	C	exonic	Vmn2r115	.	nonsynonymous SNV	Vmn2r115:NM_001104579:exon6:c.T1979C:p.I660T	17qA3.3
chr17	23359627	23359627	C	A	exonic	Vmn2r115	.	stopgain	Vmn2r115:NM_001104579:exon6:c.C2073A:p.Y691X	17qA3.3
chr17	23359628	23359628	T	C	exonic	Vmn2r115	.	nonsynonymous SNV	Vmn2r115:NM_001104579:exon6:c.T2074C:p.F692L	17qA3.3
chr17	23359693	23359693	T	A	exonic	Vmn2r115	.	stopgain	Vmn2r115:NM_001104579:exon6:c.T2139A:p.C713X	17qA3.3
chr17	23359697	23359697	G	A	exonic	Vmn2r115	.	nonsynonymous SNV	Vmn2r115:NM_001104579:exon6:c.G2143A:p.V715I	17qA3.3
chr17	23359709	23359709	G	C	exonic	Vmn2r115	.	nonsynonymous SNV	Vmn2r115:NM_001104579:exon6:c.G2155C:p.A719P	17qA3.3
chr17	23359724	23359724	G	T	exonic	Vmn2r115	.	nonsynonymous SNV	Vmn2r115:NM_001104579:exon6:c.G2170T:p.V724F	17qA3.3
chr17	23359737	23359737	G	C	exonic	Vmn2r115	.	nonsynonymous SNV	Vmn2r115:NM_001104579:exon6:c.G2183C:p.G728A	17qA3.3
chr17	23359740	23359740	A	T	exonic	Vmn2r115	.	nonsynonymous SNV	Vmn2r115:NM_001104579:exon6:c.A2186T:p.Q729L	17qA3.3
chr17	23359741	23359741	A	G	exonic	Vmn2r115	.	synonymous SNV	Vmn2r115:NM_001104579:exon6:c.A2187G:p.Q729Q	17qA3.3
chr17	23359781	23359781	T	A	exonic	Vmn2r115	.	nonsynonymous SNV	Vmn2r115:NM_001104579:exon6:c.T2227A:p.S743T	17qA3.3
chr17	23359865	23359865	C	T	exonic	Vmn2r115	.	nonsynonymous SNV	Vmn2r115:NM_001104579:exon6:c.C2311T:p.L771F	17qA3.3
chr17	23359888	23359888	T	C	exonic	Vmn2r115	.	synonymous SNV	Vmn2r115:NM_001104579:exon6:c.T2334C:p.A778A	17qA3.3
chr17	23359912	23359912	G	T	exonic	Vmn2r115	.	synonymous SNV	Vmn2r115:NM_001104579:exon6:c.G2358T:p.L786L	17qA3.3
chr17	23359933	23359933	C	T	exonic	Vmn2r115	.	synonymous SNV	Vmn2r115:NM_001104579:exon6:c.C2379T:p.V793V	17qA3.3
chr17	23359942	23359942	C	A	exonic	Vmn2r115	.	synonymous SNV	Vmn2r115:NM_001104579:exon6:c.C2388A:p.I796I	17qA3.3
chr17	23359956	23359956	G	A	exonic	Vmn2r115	.	nonsynonymous SNV	Vmn2r115:NM_001104579:exon6:c.G2402A:p.S801N	17qA3.3
chr17	23359984	23359984	G	A	exonic	Vmn2r115	.	synonymous SNV	Vmn2r115:NM_001104579:exon6:c.G2430A:p.V810V	17qA3.3
chr17	23360006	23360006	T	A	exonic	Vmn2r115	.	nonsynonymous SNV	Vmn2r115:NM_001104579:exon6:c.T2452A:p.S818T	17qA3.3
chr17	23360025	23360025	G	A	exonic	Vmn2r115	.	nonsynonymous SNV	Vmn2r115:NM_001104579:exon6:c.G2471A:p.G824E	17qA3.3
chr17	23360079	23360079	C	A	exonic	Vmn2r115	.	nonsynonymous SNV	Vmn2r115:NM_001104579:exon6:c.C2525A:p.S842Y	17qA3.3
chr17	23360095	23360095	G	A	exonic	Vmn2r115	.	synonymous SNV	Vmn2r115:NM_001104579:exon6:c.G2541A:p.R847R	17qA3.3
chr17	23360111	23360111	A	C	exonic	Vmn2r115	.	nonsynonymous SNV	Vmn2r115:NM_001104579:exon6:c.A2557C:p.N853H	17qA3.3
chr17	23360118	23360118	G	A	exonic	Vmn2r115	.	nonsynonymous SNV	Vmn2r115:NM_001104579:exon6:c.G2564A:p.R855H	17qA3.3
chr17	23360121	23360121	G	T	exonic	Vmn2r115	.	nonsynonymous SNV	Vmn2r115:NM_001104579:exon6:c.G2567T:p.S856I	17qA3.3
chr17	23401429	23401429	T	A	exonic	Vmn2r116	.	stopgain	Vmn2r116:NM_001104580:exon6:c.T2136A:p.C712X	17qA3.3
chr17	23401433	23401433	G	A	exonic	Vmn2r116	.	nonsynonymous SNV	Vmn2r116:NM_001104580:exon6:c.G2140A:p.V714I	17qA3.3
chr17	23401442	23401442	A	G	exonic	Vmn2r116	.	nonsynonymous SNV	Vmn2r116:NM_001104580:exon6:c.A2149G:p.R717G	17qA3.3
chr17	23401445	23401445	G	C	exonic	Vmn2r116	.	nonsynonymous SNV	Vmn2r116:NM_001104580:exon6:c.G2152C:p.A718P	17qA3.3
chr17	23401476	23401476	A	T	exonic	Vmn2r116	.	nonsynonymous SNV	Vmn2r116:NM_001104580:exon6:c.A2183T:p.H728L	17qA3.3
chr17	23401477	23401477	T	G	exonic	Vmn2r116	.	nonsynonymous SNV	Vmn2r116:NM_001104580:exon6:c.T2184G:p.H728Q	17qA3.3
chr17	23460271	23460271	C	T	exonic	Vmn2r117	.	nonsynonymous SNV	Vmn2r117:NM_001104581:exon6:c.G1978A:p.V660I	17qA3.3
chr17	23460280	23460280	T	C	exonic	Vmn2r117	.	nonsynonymous SNV	Vmn2r117:NM_001104581:exon6:c.A1969G:p.T657A	17qA3.3
chr17	23471184	23471184	G	A	exonic	Vmn2r117	.	synonymous SNV	Vmn2r117:NM_001104581:exon5:c.C1647T:p.N549N	17qA3.3
chr17	23471241	23471241	G	A	exonic	Vmn2r117	.	synonymous SNV	Vmn2r117:NM_001104581:exon5:c.C1590T:p.D530D	17qA3.3
chr17	23471274	23471274	T	A	exonic	Vmn2r117	.	nonsynonymous SNV	Vmn2r117:NM_001104581:exon5:c.A1557T:p.E519D	17qA3.3
chr17	23475347	23475347	C	T	exonic	Vmn2r117	.	nonsynonymous SNV	Vmn2r117:NM_001104581:exon4:c.G1525A:p.A509T	17qA3.3
chr17	23475353	23475353	C	A	exonic	Vmn2r117	.	stopgain	Vmn2r117:NM_001104581:exon4:c.G1519T:p.G507X	17qA3.3
chr17	23475408	23475408	G	A	exonic	Vmn2r117	.	synonymous SNV	Vmn2r117:NM_001104581:exon4:c.C1464T:p.Y488Y	17qA3.3
chr17	23475429	23475429	T	G	exonic	Vmn2r117	.	nonsynonymous SNV	Vmn2r117:NM_001104581:exon4:c.A1443C:p.K481N	17qA3.3
chr17	23475483	23475483	T	C	exonic	Vmn2r117	.	synonymous SNV	Vmn2r117:NM_001104581:exon4:c.A1389G:p.E463E	17qA3.3
chr17	23475487	23475487	T	A	exonic	Vmn2r117	.	nonsynonymous SNV	Vmn2r117:NM_001104581:exon4:c.A1385T:p.E462V	17qA3.3
chr17	23475489	23475489	C	T	exonic	Vmn2r117	.	synonymous SNV	Vmn2r117:NM_001104581:exon4:c.G1383A:p.Q461Q	17qA3.3
chr17	23477592	23477592	G	A	exonic	Vmn2r117	.	synonymous SNV	Vmn2r117:NM_001104581:exon3:c.C840T:p.T280T	17qA3.3
chr17	23477613	23477613	A	G	exonic	Vmn2r117	.	synonymous SNV	Vmn2r117:NM_001104581:exon3:c.T819C:p.I273I	17qA3.3
chr17	23477616	23477616	G	A	exonic	Vmn2r117	.	synonymous SNV	Vmn2r117:NM_001104581:exon3:c.C816T:p.I272I	17qA3.3
chr17	23477618	23477618	T	A	exonic	Vmn2r117	.	nonsynonymous SNV	Vmn2r117:NM_001104581:exon3:c.A814T:p.I272F	17qA3.3
chr17	23477689	23477689	C	T	exonic	Vmn2r117	.	nonsynonymous SNV	Vmn2r117:NM_001104581:exon3:c.G743A:p.S248N	17qA3.3
chr17	23477691	23477691	C	T	exonic	Vmn2r117	.	nonsynonymous SNV	Vmn2r117:NM_001104581:exon3:c.G741A:p.M247I	17qA3.3
chr17	23477695	23477695	G	A	exonic	Vmn2r117	.	nonsynonymous SNV	Vmn2r117:NM_001104581:exon3:c.C737T:p.P246L	17qA3.3
chr17	23477705	23477705	T	C	exonic	Vmn2r117	.	nonsynonymous SNV	Vmn2r117:NM_001104581:exon3:c.A727G:p.N243D	17qA3.3
chr17	23477712	23477712	G	A	exonic	Vmn2r117	.	synonymous SNV	Vmn2r117:NM_001104581:exon3:c.C720T:p.A240A	17qA3.3
chr17	23477713	23477713	G	A	exonic	Vmn2r117	.	nonsynonymous SNV	Vmn2r117:NM_001104581:exon3:c.C719T:p.A240V	17qA3.3
chr17	23477723	23477723	C	G	exonic	Vmn2r117	.	nonsynonymous SNV	Vmn2r117:NM_001104581:exon3:c.G709C:p.V237L	17qA3.3
chr17	23477770	23477770	T	C	exonic	Vmn2r117	.	nonsynonymous SNV	Vmn2r117:NM_001104581:exon3:c.A662G:p.D221G	17qA3.3
chr17	23477773	23477773	T	C	exonic	Vmn2r117	.	nonsynonymous SNV	Vmn2r117:NM_001104581:exon3:c.A659G:p.E220G	17qA3.3
chr17	23477781	23477781	G	A	exonic	Vmn2r117	.	synonymous SNV	Vmn2r117:NM_001104581:exon3:c.C651T:p.D217D	17qA3.3
chr17	23477804	23477804	A	G	exonic	Vmn2r117	.	nonsynonymous SNV	Vmn2r117:NM_001104581:exon3:c.T628C:p.W210R	17qA3.3
chr17	23477811	23477811	A	G	exonic	Vmn2r117	.	synonymous SNV	Vmn2r117:NM_001104581:exon3:c.T621C:p.S207S	17qA3.3
chr17	23477837	23477837	G	A	exonic	Vmn2r117	.	synonymous SNV	Vmn2r117:NM_001104581:exon3:c.C595T:p.L199L	17qA3.3
chr17	23477840	23477840	C	T	exonic	Vmn2r117	.	nonsynonymous SNV	Vmn2r117:NM_001104581:exon3:c.G592A:p.A198T	17qA3.3
chr17	23477858	23477858	G	A	exonic	Vmn2r117	.	nonsynonymous SNV	Vmn2r117:NM_001104581:exon3:c.C574T:p.H192Y	17qA3.3
chr17	23478268	23478268	A	T	exonic	Vmn2r117	.	nonsynonymous SNV	Vmn2r117:NM_001104581:exon2:c.T449A:p.V150E	17qA3.3
chr17	23478305	23478305	C	T	exonic	Vmn2r117	.	nonsynonymous SNV	Vmn2r117:NM_001104581:exon2:c.G412A:p.A138T	17qA3.3
chr17	23478310	23478310	T	C	exonic	Vmn2r117	.	nonsynonymous SNV	Vmn2r117:NM_001104581:exon2:c.A407G:p.K136R	17qA3.3
chr17	23478327	23478327	C	G	exonic	Vmn2r117	.	nonsynonymous SNV	Vmn2r117:NM_001104581:exon2:c.G390C:p.M130I	17qA3.3
chr17	23478337	23478337	G	A	exonic	Vmn2r117	.	nonsynonymous SNV	Vmn2r117:NM_001104581:exon2:c.C380T:p.P127L	17qA3.3
chr17	23478356	23478356	G	A	exonic	Vmn2r117	.	stopgain	Vmn2r117:NM_001104581:exon2:c.C361T:p.Q121X	17qA3.3
chr17	23478504	23478504	G	A	exonic	Vmn2r117	.	synonymous SNV	Vmn2r117:NM_001104581:exon2:c.C213T:p.N71N	17qA3.3
chr17	23479401	23479401	T	C	exonic	Vmn2r117	.	nonsynonymous SNV	Vmn2r117:NM_001104581:exon1:c.A197G:p.Q66R	17qA3.3
chr17	23479402	23479402	G	A	exonic	Vmn2r117	.	stopgain	Vmn2r117:NM_001104581:exon1:c.C196T:p.Q66X	17qA3.3
chr17	23479412	23479412	T	A	exonic	Vmn2r117	.	synonymous SNV	Vmn2r117:NM_001104581:exon1:c.A186T:p.I62I	17qA3.3
chr17	23479419	23479419	C	T	exonic	Vmn2r117	.	nonsynonymous SNV	Vmn2r117:NM_001104581:exon1:c.G179A:p.S60N	17qA3.3
chr17	23479427	23479427	C	T	exonic	Vmn2r117	.	synonymous SNV	Vmn2r117:NM_001104581:exon1:c.G171A:p.E57E	17qA3.3
chr17	23479442	23479442	C	A	exonic	Vmn2r117	.	synonymous SNV	Vmn2r117:NM_001104581:exon1:c.G156T:p.R52R	17qA3.3
chr17	23479444	23479444	G	A	exonic	Vmn2r117	.	nonsynonymous SNV	Vmn2r117:NM_001104581:exon1:c.C154T:p.R52W	17qA3.3
chr17	23479447	23479447	G	T	exonic	Vmn2r117	.	nonsynonymous SNV	Vmn2r117:NM_001104581:exon1:c.C151A:p.Q51K	17qA3.3
chr17	23479456	23479456	G	A	exonic	Vmn2r117	.	nonsynonymous SNV	Vmn2r117:NM_001104581:exon1:c.C142T:p.H48Y	17qA3.3
chr17	23479461	23479461	A	C	exonic	Vmn2r117	.	nonsynonymous SNV	Vmn2r117:NM_001104581:exon1:c.T137G:p.M46R	17qA3.3
chr17	23479462	23479462	T	A	exonic	Vmn2r117	.	nonsynonymous SNV	Vmn2r117:NM_001104581:exon1:c.A136T:p.M46L	17qA3.3
chr17	23479469	23479469	G	T	exonic	Vmn2r117	.	stopgain	Vmn2r117:NM_001104581:exon1:c.C129A:p.C43X	17qA3.3
chr17	23479470	23479470	C	A	exonic	Vmn2r117	.	nonsynonymous SNV	Vmn2r117:NM_001104581:exon1:c.G128T:p.C43F	17qA3.3
chr17	23479481	23479481	C	T	exonic	Vmn2r117	.	synonymous SNV	Vmn2r117:NM_001104581:exon1:c.G117A:p.Q39Q	17qA3.3
chr17	23479483	23479483	G	T	exonic	Vmn2r117	.	nonsynonymous SNV	Vmn2r117:NM_001104581:exon1:c.C115A:p.Q39K	17qA3.3
chr17	23479497	23479497	T	A	exonic	Vmn2r117	.	nonsynonymous SNV	Vmn2r117:NM_001104581:exon1:c.A101T:p.D34V	17qA3.3
chr17	23479505	23479505	C	G	exonic	Vmn2r117	.	nonsynonymous SNV	Vmn2r117:NM_001104581:exon1:c.G93C:p.Q31H	17qA3.3
chr17	23479544	23479544	A	T	exonic	Vmn2r117	.	synonymous SNV	Vmn2r117:NM_001104581:exon1:c.T54A:p.S18S	17qA3.3
chr17	23479546	23479546	A	C	exonic	Vmn2r117	.	nonsynonymous SNV	Vmn2r117:NM_001104581:exon1:c.T52G:p.S18A	17qA3.3
chr17	23479590	23479590	G	A	exonic	Vmn2r117	.	nonsynonymous SNV	Vmn2r117:NM_001104581:exon1:c.C8T:p.T3I	17qA3.3
chr17	35425194	35425194	A	G	exonic	H2-Q6;H2-Q8	.	nonsynonymous SNV	H2-Q6:NM_001368741:exon2:c.A151G:p.N51D,H2-Q6:NM_001368742:exon2:c.A151G:p.N51D,H2-Q8:NM_023124:exon2:c.A151G:p.N51D,H2-Q6:NM_207648:exon2:c.A151G:p.N51D	17qB1
chr17	35425198	35425198	A	C	exonic	H2-Q6;H2-Q8	.	nonsynonymous SNV	H2-Q6:NM_001368741:exon2:c.A155C:p.K52T,H2-Q6:NM_001368742:exon2:c.A155C:p.K52T,H2-Q8:NM_023124:exon2:c.A155C:p.K52T,H2-Q6:NM_207648:exon2:c.A155C:p.K52T	17qB1
chr17	35440154	35440154	C	G	exonic	H2-Q7;H2-Q9	.	nonsynonymous SNV	H2-Q7:NM_001198560:exon3:c.C580G:p.Q194E,H2-Q7:NM_001198561:exon3:c.C580G:p.Q194E,H2-Q9:NM_001201460:exon3:c.C580G:p.Q194E,H2-Q7:NM_010394:exon3:c.C580G:p.Q194E	17qB1
chr17	45568250	45568250	G	A	exonic	Hsp90ab1	.	nonsynonymous SNV	Hsp90ab1:NM_008302:exon10:c.C2044T:p.R682C	17qB3
chr17	45568259	45568259	G	T	exonic	Hsp90ab1	.	nonsynonymous SNV	Hsp90ab1:NM_008302:exon10:c.C2035A:p.R679S	17qB3
chr17	45568268	45568268	G	A	exonic	Hsp90ab1	.	nonsynonymous SNV	Hsp90ab1:NM_008302:exon10:c.C2026T:p.H676Y	17qB3
chr17	45568269	45568269	G	C	exonic	Hsp90ab1	.	synonymous SNV	Hsp90ab1:NM_008302:exon10:c.C2025G:p.T675T	17qB3
chr17	45568270	45568270	G	A	exonic	Hsp90ab1	.	nonsynonymous SNV	Hsp90ab1:NM_008302:exon10:c.C2024T:p.T675I	17qB3
chr17	45568275	45568275	G	T	exonic	Hsp90ab1	.	synonymous SNV	Hsp90ab1:NM_008302:exon10:c.C2019A:p.P673P	17qB3
chr17	45568279	45568279	T	A	exonic	Hsp90ab1	.	nonsynonymous SNV	Hsp90ab1:NM_008302:exon10:c.A2015T:p.D672V	17qB3
chr17	45568405	45568405	G	A	exonic	Hsp90ab1	.	nonsynonymous SNV	Hsp90ab1:NM_008302:exon10:c.C1889T:p.P630L	17qB3
chr17	45568409	45568409	T	A	exonic	Hsp90ab1	.	nonsynonymous SNV	Hsp90ab1:NM_008302:exon10:c.A1885T:p.N629Y	17qB3
chr17	45568416	45568416	C	T	exonic	Hsp90ab1	.	synonymous SNV	Hsp90ab1:NM_008302:exon10:c.G1878A:p.L626L	17qB3
chr17	45568434	45568434	C	T	exonic	Hsp90ab1	.	nonsynonymous SNV	Hsp90ab1:NM_008302:exon10:c.G1860A:p.M620I	17qB3
chr17	45568435	45568435	A	G	exonic	Hsp90ab1	.	nonsynonymous SNV	Hsp90ab1:NM_008302:exon10:c.T1859C:p.M620T	17qB3
chr17	45568456	45568456	T	C	exonic	Hsp90ab1	.	nonsynonymous SNV	Hsp90ab1:NM_008302:exon10:c.A1838G:p.D613G	17qB3
chr17	45568460	45568460	G	A	exonic	Hsp90ab1	.	stopgain	Hsp90ab1:NM_008302:exon10:c.C1834T:p.R612X	17qB3
chr17	45568465	45568465	G	A	exonic	Hsp90ab1	.	nonsynonymous SNV	Hsp90ab1:NM_008302:exon10:c.C1829T:p.A610V	17qB3
chr17	45568474	45568474	T	G	exonic	Hsp90ab1	.	nonsynonymous SNV	Hsp90ab1:NM_008302:exon10:c.A1820C:p.K607T	17qB3
chr17	45568482	45568482	C	G	exonic	Hsp90ab1	.	synonymous SNV	Hsp90ab1:NM_008302:exon10:c.G1812C:p.R604R	17qB3
chr17	45568484	45568484	G	A	exonic	Hsp90ab1	.	nonsynonymous SNV	Hsp90ab1:NM_008302:exon10:c.C1810T:p.R604W	17qB3
chr17	45568493	45568493	T	C	exonic	Hsp90ab1	.	nonsynonymous SNV	Hsp90ab1:NM_008302:exon10:c.A1801G:p.N601D	17qB3
chr17	45568503	45568503	G	A	exonic	Hsp90ab1	.	synonymous SNV	Hsp90ab1:NM_008302:exon10:c.C1791T:p.G597G	17qB3
chr17	45568520	45568520	C	T	exonic	Hsp90ab1	.	nonsynonymous SNV	Hsp90ab1:NM_008302:exon10:c.G1774A:p.V592M	17qB3
chr17	45568530	45568530	G	C	exonic	Hsp90ab1	.	synonymous SNV	Hsp90ab1:NM_008302:exon10:c.C1764G:p.P588P	17qB3
chr17	45568531	45568531	G	T	exonic	Hsp90ab1	.	nonsynonymous SNV	Hsp90ab1:NM_008302:exon10:c.C1763A:p.P588H	17qB3
chr17	45568532	45568532	G	A	exonic	Hsp90ab1	.	nonsynonymous SNV	Hsp90ab1:NM_008302:exon10:c.C1762T:p.P588S	17qB3
chr17	45568540	45568540	A	T	exonic	Hsp90ab1	.	nonsynonymous SNV	Hsp90ab1:NM_008302:exon10:c.T1754A:p.V585E	17qB3
chr17	45568541	45568541	C	A	exonic	Hsp90ab1	.	nonsynonymous SNV	Hsp90ab1:NM_008302:exon10:c.G1753T:p.V585L	17qB3
chr17	45568544	45568544	G	C	exonic	Hsp90ab1	.	nonsynonymous SNV	Hsp90ab1:NM_008302:exon10:c.C1750G:p.L584V	17qB3
chr17	47400410	47400410	T	C	exonic	Guca1a	.	nonsynonymous SNV	Guca1a:NM_008189:exon1:c.A10G:p.I4V	17qC
chr17	67752883	67752883	G	A	exonic	Lama1	.	nonsynonymous SNV	Lama1:NM_008480:exon14:c.G1966A:p.D656N	17qE1.1
chr18	5210645	5210645	G	A	exonic	Zfp438	.	synonymous SNV	Zfp438:NM_001360447:exon5:c.C2392T:p.L798L,Zfp438:NM_178722:exon5:c.C2392T:p.L798L	18qA1
chr18	37980328	37980328	C	T	exonic	Arap3	.	nonsynonymous SNV	Arap3:NM_001205336:exon22:c.G2875A:p.V959M,Arap3:NM_139206:exon22:c.G3109A:p.V1037M	18qB3
chr19	13479687	13479687	G	A	exonic	Olfr1475	.	synonymous SNV	Olfr1475:NM_146301:exon1:c.C510T:p.N170N	19qA
chr19	21598274	21598274	T	C	exonic	1110059E24Rik	.	synonymous SNV	1110059E24Rik:NM_025423:exon4:c.A384G:p.R128R	19qB
chr19	38938443	38938443	G	A	exonic	Hells	.	nonsynonymous SNV	Hells:NM_008234:exon4:c.G266A:p.R89Q	19qC3
chr19	47513848	47513848	G	A	exonic	Stn1	.	nonsynonymous SNV	Stn1:NM_175360:exon7:c.C746T:p.A249V	19qC3
chr1_GL456212_random	136547	136547	G	T	exonic	LOC102638047	.	nonsynonymous SNV	LOC102638047:NM_001378739:exon7:c.C955A:p.Q319K,LOC102638047:NM_001378740:exon7:c.C952A:p.Q318K	.
chr1_GL456212_random	143026	143026	G	A	exonic	LOC102638047	.	nonsynonymous SNV	LOC102638047:NM_001378739:exon3:c.C539T:p.A180V,LOC102638047:NM_001378740:exon3:c.C539T:p.A180V	.
chr1_GL456212_random	143027	143027	C	T	exonic	LOC102638047	.	nonsynonymous SNV	LOC102638047:NM_001378739:exon3:c.G538A:p.A180T,LOC102638047:NM_001378740:exon3:c.G538A:p.A180T	.
chr2	18123731	18123731	C	T	exonic	Mllt10	.	synonymous SNV	Mllt10:NM_001252560:exon7:c.C522T:p.A174A,Mllt10:NM_010804:exon7:c.C522T:p.A174A,Mllt10:NM_001252561:exon8:c.C288T:p.A96A	2qA3
chr2	25434316	25434316	T	A	exonic	Abca2	.	nonsynonymous SNV	Abca2:NM_001368624:exon7:c.T686A:p.L229Q,Abca2:NM_007379:exon7:c.T683A:p.L228Q	2qA3
chr2	25434319	25434319	T	A	exonic	Abca2	.	nonsynonymous SNV	Abca2:NM_001368624:exon7:c.T689A:p.L230Q,Abca2:NM_007379:exon7:c.T686A:p.L229Q	2qA3
chr2	31388229	31388229	C	T	exonic	Hmcn2	.	nonsynonymous SNV	Hmcn2:NM_001370902:exon32:c.C4915T:p.P1639S	2qB
chr2	82984939	82984939	G	T	exonic	Fsip2	.	nonsynonymous SNV	Fsip2:NM_001370266:exon17:c.G11009T:p.R3670M	2qD
chr2	86594544	86594544	A	G	exonic	Olfr1082	.	nonsynonymous SNV	Olfr1082:NM_207674:exon2:c.T283C:p.S95P	2qD
chr2	119292937	119292937	C	T	exonic	Vps18	.	nonsynonymous SNV	Vps18:NM_172269:exon4:c.C344T:p.A115V	2qE5
chr3	15411378	15411378	C	T	exonic	Sirpb1a	.	nonsynonymous SNV	Sirpb1a:NM_001002898:exon3:c.G559A:p.D187N	3qA1
chr3	15411385	15411385	C	T	exonic	Sirpb1a	.	synonymous SNV	Sirpb1a:NM_001002898:exon3:c.G552A:p.K184K	3qA1
chr3	15411410	15411410	C	T	exonic	Sirpb1a	.	nonsynonymous SNV	Sirpb1a:NM_001002898:exon3:c.G527A:p.R176Q	3qA1
chr3	15411499	15411499	T	C	exonic	Sirpb1a	.	synonymous SNV	Sirpb1a:NM_001002898:exon3:c.A438G:p.P146P	3qA1
chr3	15416972	15416972	T	G	exonic	Sirpb1a	.	nonsynonymous SNV	Sirpb1a:NM_001002898:exon2:c.A295C:p.M99L	3qA1
chr3	15416977	15416977	T	C	exonic	Sirpb1a	.	nonsynonymous SNV	Sirpb1a:NM_001002898:exon2:c.A290G:p.N97S	3qA1
chr3	15416986	15416986	G	T	exonic	Sirpb1a	.	nonsynonymous SNV	Sirpb1a:NM_001002898:exon2:c.C281A:p.T94K	3qA1
chr3	15417016	15417016	G	A	exonic	Sirpb1a	.	nonsynonymous SNV	Sirpb1a:NM_001002898:exon2:c.C251T:p.S84F	3qA1
chr3	15417020	15417020	G	A	exonic	Sirpb1a	.	nonsynonymous SNV	Sirpb1a:NM_001002898:exon2:c.C247T:p.H83Y	3qA1
chr3	15417060	15417060	T	A	exonic	Sirpb1a	.	synonymous SNV	Sirpb1a:NM_001002898:exon2:c.A207T:p.V69V	3qA1
chr3	15417069	15417069	A	G	exonic	Sirpb1a	.	synonymous SNV	Sirpb1a:NM_001002898:exon2:c.T198C:p.Y66Y	3qA1
chr3	15417076	15417076	C	T	exonic	Sirpb1a	.	nonsynonymous SNV	Sirpb1a:NM_001002898:exon2:c.G191A:p.R64K	3qA1
chr3	15417100	15417100	G	T	exonic	Sirpb1a	.	nonsynonymous SNV	Sirpb1a:NM_001002898:exon2:c.C167A:p.S56Y	3qA1
chr3	15417117	15417117	T	C	exonic	Sirpb1a	.	synonymous SNV	Sirpb1a:NM_001002898:exon2:c.A150G:p.L50L	3qA1
chr3	15548774	15548774	G	A	exonic	Sirpb1b	.	nonsynonymous SNV	Sirpb1b:NM_001173460:exon2:c.C247T:p.H83Y	3qA1
chr3	15548789	15548789	A	G	exonic	Sirpb1b	.	nonsynonymous SNV	Sirpb1b:NM_001173460:exon2:c.T232C:p.S78P	3qA1
chr3	15548790	15548790	C	G	exonic	Sirpb1b	.	nonsynonymous SNV	Sirpb1b:NM_001173460:exon2:c.G231C:p.Q77H	3qA1
chr3	15548792	15548792	G	A	exonic	Sirpb1b	.	stopgain	Sirpb1b:NM_001173460:exon2:c.C229T:p.Q77X	3qA1
chr3	15548814	15548814	T	A	exonic	Sirpb1b	.	synonymous SNV	Sirpb1b:NM_001173460:exon2:c.A207T:p.V69V	3qA1
chr3	15548925	15548925	C	T	exonic	Sirpb1b	.	synonymous SNV	Sirpb1b:NM_001173460:exon2:c.G96A:p.K32K	3qA1
chr3	15548939	15548939	T	C	exonic	Sirpb1b	.	nonsynonymous SNV	Sirpb1b:NM_001173460:exon2:c.A82G:p.M28V	3qA1
chr3	15838649	15838649	C	A	exonic	Sirpb1c	.	nonsynonymous SNV	Sirpb1c:NM_001173459:exon2:c.G390T:p.M130I	3qA1
chr3	15838666	15838666	G	A	exonic	Sirpb1c	.	nonsynonymous SNV	Sirpb1c:NM_001173459:exon2:c.C373T:p.P125S	3qA1
chr3	15838790	15838790	G	A	exonic	Sirpb1c	.	synonymous SNV	Sirpb1c:NM_001173459:exon2:c.C249T:p.R83R	3qA1
chr3	15838791	15838791	C	T	exonic	Sirpb1c	.	nonsynonymous SNV	Sirpb1c:NM_001173459:exon2:c.G248A:p.R83H	3qA1
chr3	15838792	15838792	G	A	exonic	Sirpb1c	.	nonsynonymous SNV	Sirpb1c:NM_001173459:exon2:c.C247T:p.R83C	3qA1
chr3	15838807	15838807	A	G	exonic	Sirpb1c	.	nonsynonymous SNV	Sirpb1c:NM_001173459:exon2:c.T232C:p.S78P	3qA1
chr3	15838832	15838832	T	A	exonic	Sirpb1c	.	synonymous SNV	Sirpb1c:NM_001173459:exon2:c.A207T:p.V69V	3qA1
chr3	15838839	15838839	T	C	exonic	Sirpb1c	.	nonsynonymous SNV	Sirpb1c:NM_001173459:exon2:c.A200G:p.K67R	3qA1
chr3	36967166	36967166	G	A	exonic	4932438A13Rik	.	synonymous SNV	4932438A13Rik:NM_172679:exon41:c.G6435A:p.R2145R	3qB
chr3	69085695	69085695	T	A	exonic	Kpna4	.	nonsynonymous SNV	Kpna4:NM_008467:exon12:c.A1024T:p.I342F	3qE1
chr3	72951641	72951641	G	A	exonic	Sis	.	synonymous SNV	Sis:NM_001081137:exon10:c.C1056T:p.Y352Y	3qE3
chr3	95734876	95734876	T	C	exonic	Ecm1	.	nonsynonymous SNV	Ecm1:NM_001252653:exon10:c.A1393G:p.I465V,Ecm1:NM_001355070:exon10:c.A1393G:p.I465V,Ecm1:NM_007899:exon10:c.A1396G:p.I466V	3qF2.1
chr3	96854557	96854557	A	G	exonic	Pdzk1	.	nonsynonymous SNV	Pdzk1:NM_001146001:exon4:c.A484G:p.N162D,Pdzk1:NM_001355710:exon4:c.A484G:p.N162D,Pdzk1:NM_021517:exon4:c.A484G:p.N162D	3qF2.1
chr3	129918598	129918598	C	T	exonic	Mcub	.	synonymous SNV	Mcub:NM_025779:exon5:c.G627A:p.R209R	3qG3
chr3	151439315	151439315	G	T	exonic	Adgrl4	.	stopgain	Adgrl4:NM_133222:exon2:c.G100T:p.E34X	3qH3
chr4	3184971	3184971	G	A	exonic	Vmn1r3	.	nonsynonymous SNV	Vmn1r3:NM_001167535:exon1:c.C335T:p.T112I	4qA1
chr4	3185220	3185220	G	A	exonic	Vmn1r3	.	nonsynonymous SNV	Vmn1r3:NM_001167535:exon1:c.C86T:p.P29L	4qA1
chr4	8785442	8785442	C	A	exonic	Chd7	.	stopgain	Chd7:NM_001277149:exon3:c.C1745A:p.S582X	4qA1
chr4	21873684	21873684	C	G	exonic	Pnisr	.	nonsynonymous SNV	Pnisr:NM_001369189:exon11:c.C1426G:p.R476G,Pnisr:NM_001369190:exon11:c.C700G:p.R234G,Pnisr:NM_001369191:exon11:c.C700G:p.R234G,Pnisr:NM_025669:exon11:c.C1426G:p.R476G	4qA3
chr4	49538148	49538148	C	A	exonic	Aldob	.	nonsynonymous SNV	Aldob:NM_144903:exon8:c.G979T:p.A327S	4qB1
chr4	112253821	112253821	A	C	exonic	Skint3	.	nonsynonymous SNV	Skint3:NM_001102474:exon3:c.A142C:p.S48R,Skint3:NM_177578:exon3:c.A142C:p.S48R	4qD1
chr4	112253822	112253822	G	A	exonic	Skint3	.	nonsynonymous SNV	Skint3:NM_001102474:exon3:c.G143A:p.S48N,Skint3:NM_177578:exon3:c.G143A:p.S48N	4qD1
chr4	126165414	126165414	T	C	exonic	Thrap3	.	synonymous SNV	Thrap3:NM_146153:exon11:c.A2838G:p.L946L,Thrap3:NM_001356455:exon12:c.A2838G:p.L946L,Thrap3:NM_001356456:exon12:c.A2838G:p.L946L	4qD2.2
chr4	126165453	126165453	G	A	exonic	Thrap3	.	synonymous SNV	Thrap3:NM_146153:exon11:c.C2799T:p.D933D,Thrap3:NM_001356455:exon12:c.C2799T:p.D933D,Thrap3:NM_001356456:exon12:c.C2799T:p.D933D	4qD2.2
chr4	126165578	126165578	C	T	exonic	Thrap3	.	nonsynonymous SNV	Thrap3:NM_146153:exon11:c.G2674A:p.G892S,Thrap3:NM_001356455:exon12:c.G2674A:p.G892S,Thrap3:NM_001356456:exon12:c.G2674A:p.G892S	4qD2.2
chr4	138221673	138221673	C	T	exonic	Hp1bp3	.	nonsynonymous SNV	Hp1bp3:NM_001122897:exon2:c.C46T:p.L16F,Hp1bp3:NM_001285478:exon2:c.C46T:p.L16F,Hp1bp3:NM_001285479:exon2:c.C46T:p.L16F,Hp1bp3:NM_001285481:exon2:c.C46T:p.L16F,Hp1bp3:NM_010470:exon2:c.C46T:p.L16F	4qD3
chr4	140798123	140798123	A	G	exonic	Padi3	.	nonsynonymous SNV	Padi3:NM_011060:exon6:c.T578C:p.L193P	4qD3
chr4	145537536	145537536	G	C	exonic	Zfp990	.	nonsynonymous SNV	Zfp990:NM_001324553:exon4:c.G1103C:p.R368T	4qE1
chr4	145537568	145537568	C	A	exonic	Zfp990	.	nonsynonymous SNV	Zfp990:NM_001324553:exon4:c.C1135A:p.P379T	4qE1
chr4	145537584	145537584	G	A	exonic	Zfp990	.	nonsynonymous SNV	Zfp990:NM_001324553:exon4:c.G1151A:p.G384E	4qE1
chr4	145622166	145622166	T	C	exonic	Gm13212	.	nonsynonymous SNV	Gm13212:NM_001324416:exon4:c.T172C:p.C58R	4qE1
chr4	145622334	145622334	C	A	exonic	Gm13212	.	nonsynonymous SNV	Gm13212:NM_001324416:exon4:c.C340A:p.Q114K	4qE1
chr4	145701406	145701406	T	C	exonic	Zfp980	.	nonsynonymous SNV	Zfp980:NM_001103158:exon5:c.T704C:p.L235P	4qE1
chr4	146125231	146125231	G	C	exonic	Zfp987	.	nonsynonymous SNV	Zfp987:NM_001037926:exon4:c.G1232C:p.S411T	4qE1
chr4	146467501	146467501	A	T	exonic	Zfp991;Zfp992	.	stopgain	Zfp992:NM_001085522:exon4:c.A1678T:p.K560X,Zfp991:NM_001083918:exon7:c.A1678T:p.K560X	4qE1
chr4	146467506	146467506	C	A	exonic	Zfp991;Zfp992	.	synonymous SNV	Zfp992:NM_001085522:exon4:c.C1683A:p.G561G,Zfp991:NM_001083918:exon7:c.C1683A:p.G561G	4qE1
chr4	146467512	146467512	G	A	exonic	Zfp991;Zfp992	.	synonymous SNV	Zfp992:NM_001085522:exon4:c.G1689A:p.Q563Q,Zfp991:NM_001083918:exon7:c.G1689A:p.Q563Q	4qE1
chr4	146537444	146537444	C	T	exonic	Zfp981	.	synonymous SNV	Zfp981:NM_001243139:exon4:c.C825T:p.C275C,Zfp981:NM_001243138:exon5:c.C825T:p.C275C	4qE1
chr4	146537600	146537600	G	A	exonic	Zfp981	.	synonymous SNV	Zfp981:NM_001243139:exon4:c.G981A:p.E327E,Zfp981:NM_001243138:exon5:c.G981A:p.E327E	4qE1
chr4	146537623	146537623	C	A	exonic	Zfp981	.	nonsynonymous SNV	Zfp981:NM_001243139:exon4:c.C1004A:p.P335Q,Zfp981:NM_001243138:exon5:c.C1004A:p.P335Q	4qE1
chr4	146537637	146537637	T	A	exonic	Zfp981	.	nonsynonymous SNV	Zfp981:NM_001243139:exon4:c.T1018A:p.F340I,Zfp981:NM_001243138:exon5:c.T1018A:p.F340I	4qE1
chr4	146537644	146537644	G	A	exonic	Zfp981	.	nonsynonymous SNV	Zfp981:NM_001243139:exon4:c.G1025A:p.R342H,Zfp981:NM_001243138:exon5:c.G1025A:p.R342H	4qE1
chr4	146537645	146537645	T	G	exonic	Zfp981	.	synonymous SNV	Zfp981:NM_001243139:exon4:c.T1026G:p.R342R,Zfp981:NM_001243138:exon5:c.T1026G:p.R342R	4qE1
chr4	146537655	146537655	T	A	exonic	Zfp981	.	nonsynonymous SNV	Zfp981:NM_001243139:exon4:c.T1036A:p.S346T,Zfp981:NM_001243138:exon5:c.T1036A:p.S346T	4qE1
chr4	146537793	146537793	G	T	exonic	Zfp981	.	nonsynonymous SNV	Zfp981:NM_001243139:exon4:c.G1174T:p.G392C,Zfp981:NM_001243138:exon5:c.G1174T:p.G392C	4qE1
chr4	146537794	146537794	G	T	exonic	Zfp981	.	nonsynonymous SNV	Zfp981:NM_001243139:exon4:c.G1175T:p.G392V,Zfp981:NM_001243138:exon5:c.G1175T:p.G392V	4qE1
chr4	146537796	146537796	T	A	exonic	Zfp981	.	nonsynonymous SNV	Zfp981:NM_001243139:exon4:c.T1177A:p.Y393N,Zfp981:NM_001243138:exon5:c.T1177A:p.Y393N	4qE1
chr4	146537797	146537797	A	C	exonic	Zfp981	.	nonsynonymous SNV	Zfp981:NM_001243139:exon4:c.A1178C:p.Y393S,Zfp981:NM_001243138:exon5:c.A1178C:p.Y393S	4qE1
chr4	147331282	147331282	C	T	exonic	Zfp988	.	nonsynonymous SNV	Zfp988:NM_001384232:exon4:c.C172T:p.R58C	4qE1
chr4	147332015	147332015	A	G	exonic	Zfp988	.	nonsynonymous SNV	Zfp988:NM_001384232:exon4:c.A905G:p.D302G	4qE1
chr4	147332089	147332089	A	C	exonic	Zfp988	.	nonsynonymous SNV	Zfp988:NM_001384232:exon4:c.A979C:p.S327R	4qE1
chr4	147332764	147332764	G	A	exonic	Zfp988	.	nonsynonymous SNV	Zfp988:NM_001384232:exon4:c.G1654A:p.E552K	4qE1
chr4	147332877	147332877	A	C	exonic	Zfp988	.	nonsynonymous SNV	Zfp988:NM_001384232:exon4:c.A1767C:p.L589F	4qE1
chr4	147390322	147390322	A	G	exonic	Zfp978	.	nonsynonymous SNV	Zfp978:NM_001378742:exon5:c.A325G:p.I109V	4qE1
chr4	147390404	147390404	A	T	exonic	Zfp978	.	nonsynonymous SNV	Zfp978:NM_001378742:exon5:c.A407T:p.H136L	4qE1
chr4	147390588	147390588	G	A	exonic	Zfp978	.	synonymous SNV	Zfp978:NM_001378742:exon5:c.G591A:p.E197E	4qE1
chr4	147390634	147390634	A	G	exonic	Zfp978	.	nonsynonymous SNV	Zfp978:NM_001378742:exon5:c.A637G:p.S213G	4qE1
chr4	147390960	147390960	C	T	exonic	Zfp978	.	synonymous SNV	Zfp978:NM_001378742:exon5:c.C963T:p.C321C	4qE1
chr4	147390967	147390967	C	G	exonic	Zfp978	.	nonsynonymous SNV	Zfp978:NM_001378742:exon5:c.C970G:p.Q324E	4qE1
chr4	147390970	147390970	A	C	exonic	Zfp978	.	nonsynonymous SNV	Zfp978:NM_001378742:exon5:c.A973C:p.T325P	4qE1
chr4	147391258	147391258	G	A	exonic	Zfp978	.	nonsynonymous SNV	Zfp978:NM_001378742:exon5:c.G1261A:p.G421R	4qE1
chr4	147391267	147391267	T	C	exonic	Zfp978	.	nonsynonymous SNV	Zfp978:NM_001378742:exon5:c.T1270C:p.S424P	4qE1
chr4	147391303	147391303	C	G	exonic	Zfp978	.	nonsynonymous SNV	Zfp978:NM_001378742:exon5:c.C1306G:p.H436D	4qE1
chr4	147391313	147391313	C	A	exonic	Zfp978	.	nonsynonymous SNV	Zfp978:NM_001378742:exon5:c.C1316A:p.S439Y	4qE1
chr4	147391327	147391327	C	T	exonic	Zfp978	.	nonsynonymous SNV	Zfp978:NM_001378742:exon5:c.C1330T:p.H444Y	4qE1
chr4	147391387	147391387	C	G	exonic	Zfp978	.	nonsynonymous SNV	Zfp978:NM_001378742:exon5:c.C1390G:p.R464G	4qE1
chr4	147391418	147391418	T	G	exonic	Zfp978	.	nonsynonymous SNV	Zfp978:NM_001378742:exon5:c.T1421G:p.I474S	4qE1
chr4	147391436	147391436	T	C	exonic	Zfp978	.	nonsynonymous SNV	Zfp978:NM_001378742:exon5:c.T1439C:p.L480P	4qE1
chr4	147391511	147391511	G	A	exonic	Zfp978	.	nonsynonymous SNV	Zfp978:NM_001378742:exon5:c.G1514A:p.G505E	4qE1
chr4	147391518	147391518	C	T	exonic	Zfp978	.	synonymous SNV	Zfp978:NM_001378742:exon5:c.C1521T:p.N507N	4qE1
chr4	147391538	147391538	T	C	exonic	Zfp978	.	nonsynonymous SNV	Zfp978:NM_001378742:exon5:c.T1541C:p.V514A	4qE1
chr4	147507621	147507621	T	C	exonic	Zfp982	.	nonsynonymous SNV	Zfp982:NM_001039209:exon1:c.T11C:p.F4S,Zfp982:NM_001365422:exon2:c.T11C:p.F4S,Zfp982:NM_001371349:exon2:c.T11C:p.F4S,Zfp982:NM_001371348:exon3:c.T11C:p.F4S	4qE1
chr4	147510773	147510773	T	C	exonic	Zfp982	.	synonymous SNV	Zfp982:NM_001039209:exon2:c.T51C:p.D17D,Zfp982:NM_001365422:exon3:c.T51C:p.D17D,Zfp982:NM_001371349:exon3:c.T51C:p.D17D,Zfp982:NM_001371348:exon4:c.T51C:p.D17D	4qE1
chr4	147510785	147510785	A	C	exonic	Zfp982	.	nonsynonymous SNV	Zfp982:NM_001039209:exon2:c.A63C:p.E21D,Zfp982:NM_001365422:exon3:c.A63C:p.E21D,Zfp982:NM_001371349:exon3:c.A63C:p.E21D,Zfp982:NM_001371348:exon4:c.A63C:p.E21D	4qE1
chr4	147510807	147510807	C	T	exonic	Zfp982	.	nonsynonymous SNV	Zfp982:NM_001039209:exon2:c.C85T:p.R29C,Zfp982:NM_001365422:exon3:c.C85T:p.R29C,Zfp982:NM_001371349:exon3:c.C85T:p.R29C,Zfp982:NM_001371348:exon4:c.C85T:p.R29C	4qE1
chr4	147512369	147512369	G	A	exonic	Zfp982	.	nonsynonymous SNV	Zfp982:NM_001039209:exon3:c.G182A:p.C61Y,Zfp982:NM_001365422:exon4:c.G182A:p.C61Y,Zfp982:NM_001371349:exon4:c.G182A:p.C61Y,Zfp982:NM_001371348:exon5:c.G182A:p.C61Y	4qE1
chr4	147512406	147512406	C	T	exonic	Zfp982	.	synonymous SNV	Zfp982:NM_001039209:exon3:c.C219T:p.V73V,Zfp982:NM_001365422:exon4:c.C219T:p.V73V,Zfp982:NM_001371349:exon4:c.C219T:p.V73V,Zfp982:NM_001371348:exon5:c.C219T:p.V73V	4qE1
chr4	147512408	147512408	A	T	exonic	Zfp982	.	nonsynonymous SNV	Zfp982:NM_001039209:exon3:c.A221T:p.H74L,Zfp982:NM_001365422:exon4:c.A221T:p.H74L,Zfp982:NM_001371349:exon4:c.A221T:p.H74L,Zfp982:NM_001371348:exon5:c.A221T:p.H74L	4qE1
chr4	147512439	147512439	T	A	exonic	Zfp982	.	synonymous SNV	Zfp982:NM_001039209:exon3:c.T252A:p.S84S,Zfp982:NM_001365422:exon4:c.T252A:p.S84S,Zfp982:NM_001371349:exon4:c.T252A:p.S84S,Zfp982:NM_001371348:exon5:c.T252A:p.S84S	4qE1
chr4	147512483	147512483	G	A	exonic	Zfp982	.	nonsynonymous SNV	Zfp982:NM_001039209:exon3:c.G296A:p.C99Y,Zfp982:NM_001365422:exon4:c.G296A:p.C99Y,Zfp982:NM_001371349:exon4:c.G296A:p.C99Y,Zfp982:NM_001371348:exon5:c.G296A:p.C99Y	4qE1
chr4	147512510	147512510	A	T	exonic	Zfp982	.	nonsynonymous SNV	Zfp982:NM_001039209:exon3:c.A323T:p.D108V,Zfp982:NM_001365422:exon4:c.A323T:p.D108V,Zfp982:NM_001371349:exon4:c.A323T:p.D108V,Zfp982:NM_001371348:exon5:c.A323T:p.D108V	4qE1
chr4	147512528	147512528	G	A	exonic	Zfp982	.	nonsynonymous SNV	Zfp982:NM_001039209:exon3:c.G341A:p.R114K,Zfp982:NM_001365422:exon4:c.G341A:p.R114K,Zfp982:NM_001371349:exon4:c.G341A:p.R114K,Zfp982:NM_001371348:exon5:c.G341A:p.R114K	4qE1
chr4	147512550	147512550	G	T	exonic	Zfp982	.	nonsynonymous SNV	Zfp982:NM_001039209:exon3:c.G363T:p.Q121H,Zfp982:NM_001365422:exon4:c.G363T:p.Q121H,Zfp982:NM_001371349:exon4:c.G363T:p.Q121H,Zfp982:NM_001371348:exon5:c.G363T:p.Q121H	4qE1
chr4	147581328	147581328	T	G	exonic	Zfp985	.	nonsynonymous SNV	Zfp985:NM_001014397:exon5:c.T117G:p.I39M	4qE1
chr4	147583197	147583197	A	G	exonic	Zfp985	.	nonsynonymous SNV	Zfp985:NM_001014397:exon6:c.A521G:p.Q174R	4qE1
chr4	147584164	147584164	C	T	exonic	Zfp985	.	synonymous SNV	Zfp985:NM_001014397:exon6:c.C1488T:p.D496D	4qE1
chr4	147584177	147584177	C	A	exonic	Zfp985	.	nonsynonymous SNV	Zfp985:NM_001014397:exon6:c.C1501A:p.H501N	4qE1
chr4	147584183	147584183	T	C	exonic	Zfp985	.	nonsynonymous SNV	Zfp985:NM_001014397:exon6:c.T1507C:p.S503P	4qE1
chr4	147584214	147584214	C	G	exonic	Zfp985	.	nonsynonymous SNV	Zfp985:NM_001014397:exon6:c.C1538G:p.T513R	4qE1
chr4	147613029	147613029	A	T	exonic	Zfp979	.	stoploss	Zfp979:NM_145078:exon5:c.T1222A:p.X408K	4qE1
chr4	147613220	147613220	C	G	exonic	Zfp979	.	nonsynonymous SNV	Zfp979:NM_145078:exon5:c.G1031C:p.S344T	4qE1
chr4	147613229	147613229	G	T	exonic	Zfp979	.	nonsynonymous SNV	Zfp979:NM_145078:exon5:c.C1022A:p.S341Y	4qE1
chr4	147613318	147613318	C	T	exonic	Zfp979	.	synonymous SNV	Zfp979:NM_145078:exon5:c.G933A:p.K311K	4qE1
chr4	147613528	147613528	C	T	exonic	Zfp979	.	synonymous SNV	Zfp979:NM_145078:exon5:c.G723A:p.K241K	4qE1
chr4	147613577	147613577	A	C	exonic	Zfp979	.	stopgain	Zfp979:NM_145078:exon5:c.T674G:p.L225X	4qE1
chr4	147613578	147613578	A	C	exonic	Zfp979	.	nonsynonymous SNV	Zfp979:NM_145078:exon5:c.T673G:p.L225V	4qE1
chr4	147613775	147613775	G	A	exonic	Zfp979	.	nonsynonymous SNV	Zfp979:NM_145078:exon5:c.C476T:p.T159I	4qE1
chr4	147613813	147613813	T	C	exonic	Zfp979	.	synonymous SNV	Zfp979:NM_145078:exon5:c.A438G:p.T146T	4qE1
chr4	147613814	147613814	G	C	exonic	Zfp979	.	nonsynonymous SNV	Zfp979:NM_145078:exon5:c.C437G:p.T146R	4qE1
chr4	147613836	147613836	G	C	exonic	Zfp979	.	nonsynonymous SNV	Zfp979:NM_145078:exon5:c.C415G:p.R139G	4qE1
chr4	147615365	147615365	T	C	exonic	Zfp979	.	synonymous SNV	Zfp979:NM_145078:exon4:c.A117G:p.S39S	4qE1
chr4	147674273	147674273	T	A	exonic	Zfp534	.	nonsynonymous SNV	Zfp534:NM_001127188:exon4:c.A1938T:p.Q646H	4qE1
chr4	147674329	147674329	T	C	exonic	Zfp534	.	nonsynonymous SNV	Zfp534:NM_001127188:exon4:c.A1882G:p.R628G	4qE1
chr4	147674447	147674447	T	A	exonic	Zfp534	.	nonsynonymous SNV	Zfp534:NM_001127188:exon4:c.A1764T:p.K588N	4qE1
chr4	147674467	147674467	C	T	exonic	Zfp534	.	nonsynonymous SNV	Zfp534:NM_001127188:exon4:c.G1744A:p.D582N	4qE1
chr4	147675372	147675372	T	C	exonic	Zfp534	.	nonsynonymous SNV	Zfp534:NM_001127188:exon4:c.A839G:p.K280R	4qE1
chr4	147754886	147754886	C	T	exonic	Zfp984	.	nonsynonymous SNV	Zfp984:NM_001127189:exon6:c.G1507A:p.G503S	4qE1
chr4	147755409	147755409	G	A	exonic	Zfp984	.	synonymous SNV	Zfp984:NM_001127189:exon6:c.C984T:p.D328D	4qE1
chr4	147755505	147755505	A	G	exonic	Zfp984	.	synonymous SNV	Zfp984:NM_001127189:exon6:c.T888C:p.C296C	4qE1
chr4	147755594	147755594	T	C	exonic	Zfp984	.	nonsynonymous SNV	Zfp984:NM_001127189:exon6:c.A799G:p.K267E	4qE1
chr4	147755805	147755805	T	A	exonic	Zfp984	.	nonsynonymous SNV	Zfp984:NM_001127189:exon6:c.A588T:p.K196N	4qE1
chr4	147755871	147755871	T	C	exonic	Zfp984	.	synonymous SNV	Zfp984:NM_001127189:exon6:c.A522G:p.R174R	4qE1
chr4	148944359	148944359	T	C	exonic	Casz1	.	nonsynonymous SNV	Casz1:NM_001159344:exon16:c.T3260C:p.L1087P,Casz1:NM_027195:exon16:c.T3260C:p.L1087P	4qE2
chr4	156334030	156334030	C	T	exonic	Vmn2r123;Vmn2r129	.	synonymous SNV	Vmn2r129:NM_001384510:exon3:c.C606T:p.H202H	4qE2
chr4	156334052	156334052	A	C	exonic	Vmn2r123;Vmn2r129	.	nonsynonymous SNV	Vmn2r129:NM_001384510:exon3:c.A628C:p.M210L	4qE2
chr4	156334196	156334196	C	A	exonic	Vmn2r123;Vmn2r129	.	nonsynonymous SNV	Vmn2r129:NM_001384510:exon3:c.C772A:p.Q258K	4qE2
chr4	156334201	156334201	A	C	exonic	Vmn2r123;Vmn2r129	.	nonsynonymous SNV	Vmn2r129:NM_001384510:exon3:c.A777C:p.Q259H	4qE2
chr4	156334263	156334263	T	C	exonic	Vmn2r123;Vmn2r129	.	nonsynonymous SNV	Vmn2r129:NM_001384510:exon3:c.T839C:p.V280A	4qE2
chr4	156334296	156334296	G	A	exonic	Vmn2r123;Vmn2r129	.	nonsynonymous SNV	Vmn2r129:NM_001384510:exon3:c.G872A:p.R291Q	4qE2
chr4	156334374	156334374	C	T	exonic	Vmn2r123;Vmn2r129	.	nonsynonymous SNV	Vmn2r129:NM_001384510:exon3:c.C950T:p.T317I	4qE2
chr4	156334375	156334375	T	C	exonic	Vmn2r123;Vmn2r129	.	synonymous SNV	Vmn2r129:NM_001384510:exon3:c.T951C:p.T317T	4qE2
chr4	156334386	156334386	C	A	exonic	Vmn2r123;Vmn2r129	.	nonsynonymous SNV	Vmn2r129:NM_001384510:exon3:c.C962A:p.A321E	4qE2
chr4	156334390	156334390	C	T	exonic	Vmn2r123;Vmn2r129	.	synonymous SNV	Vmn2r129:NM_001384510:exon3:c.C966T:p.H322H	4qE2
chr4	156334393	156334393	C	T	exonic	Vmn2r123;Vmn2r129	.	synonymous SNV	Vmn2r129:NM_001384510:exon3:c.C969T:p.H323H	4qE2
chr4	156334397	156334397	G	T	exonic	Vmn2r123;Vmn2r129	.	nonsynonymous SNV	Vmn2r129:NM_001384510:exon3:c.G973T:p.V325F	4qE2
chr4	156334412	156334412	T	C	exonic	Vmn2r123;Vmn2r129	.	synonymous SNV	Vmn2r129:NM_001384510:exon3:c.T988C:p.L330L	4qE2
chr4	156334416	156334416	A	G	exonic	Vmn2r123;Vmn2r129	.	nonsynonymous SNV	Vmn2r129:NM_001384510:exon3:c.A992G:p.N331S	4qE2
chr4	156334417	156334417	T	G	exonic	Vmn2r123;Vmn2r129	.	nonsynonymous SNV	Vmn2r129:NM_001384510:exon3:c.T993G:p.N331K	4qE2
chr4	156334420	156334420	A	T	exonic	Vmn2r123;Vmn2r129	.	nonsynonymous SNV	Vmn2r129:NM_001384510:exon3:c.A996T:p.K332N	4qE2
chr4	156334443	156334443	C	T	exonic	Vmn2r123;Vmn2r129	.	nonsynonymous SNV	Vmn2r129:NM_001384510:exon3:c.C1019T:p.A340V	4qE2
chr4	156334452	156334452	C	T	exonic	Vmn2r123;Vmn2r129	.	nonsynonymous SNV	Vmn2r129:NM_001384510:exon3:c.C1028T:p.P343L	4qE2
chr4	156334454	156334454	G	A	exonic	Vmn2r123;Vmn2r129	.	nonsynonymous SNV	Vmn2r129:NM_001384510:exon3:c.G1030A:p.V344I	4qE2
chr4	156334455	156334455	T	A	exonic	Vmn2r123;Vmn2r129	.	nonsynonymous SNV	Vmn2r129:NM_001384510:exon3:c.T1031A:p.V344E	4qE2
chr4	156334475	156334475	T	C	exonic	Vmn2r123;Vmn2r129	.	synonymous SNV	Vmn2r129:NM_001384510:exon3:c.T1051C:p.L351L	4qE2
chr4	156334580	156334580	A	G	exonic	Vmn2r123;Vmn2r129	.	nonsynonymous SNV	Vmn2r129:NM_001384510:exon3:c.A1156G:p.M386V	4qE2
chr4	156334605	156334605	G	A	exonic	Vmn2r123;Vmn2r129	.	nonsynonymous SNV	Vmn2r129:NM_001384510:exon3:c.G1181A:p.S394N	4qE2
chr4	156334609	156334609	A	G	exonic	Vmn2r123;Vmn2r129	.	synonymous SNV	Vmn2r129:NM_001384510:exon3:c.A1185G:p.L395L	4qE2
chr4	156334612	156334612	T	C	exonic	Vmn2r123;Vmn2r129	.	synonymous SNV	Vmn2r129:NM_001384510:exon3:c.T1188C:p.Y396Y	4qE2
chr4	156335590	156335590	T	C	exonic	Vmn2r123	.	unknown	UNKNOWN	4qE2
chr4	156338254	156338254	C	T	exonic	Vmn2r123	.	unknown	UNKNOWN	4qE2
chr4	156338295	156338295	G	A	exonic	Vmn2r123	.	unknown	UNKNOWN	4qE2
chr4	156338311	156338311	G	A	exonic	Vmn2r123	.	unknown	UNKNOWN	4qE2
chr4	156338331	156338331	A	G	exonic	Vmn2r123	.	unknown	UNKNOWN	4qE2
chr4	156338332	156338332	C	T	exonic	Vmn2r123	.	unknown	UNKNOWN	4qE2
chr4	156338337	156338337	C	A	exonic	Vmn2r123	.	unknown	UNKNOWN	4qE2
chr4	156338348	156338348	T	C	exonic	Vmn2r123	.	unknown	UNKNOWN	4qE2
chr4	156338366	156338366	G	A	exonic	Vmn2r123	.	unknown	UNKNOWN	4qE2
chr4	156338367	156338367	C	T	exonic	Vmn2r123	.	unknown	UNKNOWN	4qE2
chr4	156338460	156338460	G	T	exonic	Vmn2r123	.	unknown	UNKNOWN	4qE2
chr4	156338484	156338484	T	G	exonic	Vmn2r123	.	unknown	UNKNOWN	4qE2
chr4	156338682	156338682	T	C	exonic	Vmn2r123	.	unknown	UNKNOWN	4qE2
chr4	156338705	156338705	T	C	exonic	Vmn2r123	.	unknown	UNKNOWN	4qE2
chr4	156338748	156338748	C	T	exonic	Vmn2r123	.	unknown	UNKNOWN	4qE2
chr4	156338790	156338790	T	G	exonic	Vmn2r123	.	unknown	UNKNOWN	4qE2
chr4	156338800	156338800	T	C	exonic	Vmn2r123	.	unknown	UNKNOWN	4qE2
chr4_GL456216_random	34280	34280	T	C	exonic	Dhrsx	.	synonymous SNV	Dhrsx:NM_001368261:exon4:c.T429C:p.R143R,Dhrsx:NM_001368262:exon4:c.T423C:p.R141R,Dhrsx:NM_001033326:exon5:c.T531C:p.R177R	.
chr4_GL456216_random	34723	34723	T	C	exonic	Dhrsx	.	synonymous SNV	Dhrsx:NM_001368261:exon5:c.T594C:p.P198P,Dhrsx:NM_001368262:exon5:c.T588C:p.P196P,Dhrsx:NM_001033326:exon6:c.T696C:p.P232P	.
chr4_GL456216_random	34752	34752	T	C	exonic	Dhrsx	.	nonsynonymous SNV	Dhrsx:NM_001368261:exon5:c.T623C:p.V208A,Dhrsx:NM_001368262:exon5:c.T617C:p.V206A,Dhrsx:NM_001033326:exon6:c.T725C:p.V242A	.
chr4_GL456216_random	34784	34784	T	C	exonic	Dhrsx	.	nonsynonymous SNV	Dhrsx:NM_001368261:exon5:c.T655C:p.W219R,Dhrsx:NM_001368262:exon5:c.T649C:p.W217R,Dhrsx:NM_001033326:exon6:c.T757C:p.W253R	.
chr4_GL456216_random	34825	34825	T	A	exonic	Dhrsx	.	synonymous SNV	Dhrsx:NM_001368261:exon5:c.T696A:p.V232V,Dhrsx:NM_001368262:exon5:c.T690A:p.V230V,Dhrsx:NM_001033326:exon6:c.T798A:p.V266V	.
chr4_GL456216_random	35258	35258	T	C	exonic	Dhrsx	.	nonsynonymous SNV	Dhrsx:NM_001368261:exon6:c.T728C:p.L243S,Dhrsx:NM_001368262:exon6:c.T722C:p.L241S,Dhrsx:NM_001033326:exon7:c.T830C:p.L277S	.
chr4_GL456216_random	35261	35261	T	C	exonic	Dhrsx	.	nonsynonymous SNV	Dhrsx:NM_001368261:exon6:c.T731C:p.V244A,Dhrsx:NM_001368262:exon6:c.T725C:p.V242A,Dhrsx:NM_001033326:exon7:c.T833C:p.V278A	.
chr4_GL456216_random	35277	35277	C	G	exonic	Dhrsx	.	synonymous SNV	Dhrsx:NM_001368261:exon6:c.C747G:p.A249A,Dhrsx:NM_001368262:exon6:c.C741G:p.A247A,Dhrsx:NM_001033326:exon7:c.C849G:p.A283A	.
chr4_GL456216_random	35295	35295	C	T	exonic	Dhrsx	.	synonymous SNV	Dhrsx:NM_001368261:exon6:c.C765T:p.V255V,Dhrsx:NM_001368262:exon6:c.C759T:p.V253V,Dhrsx:NM_001033326:exon7:c.C867T:p.V289V	.
chr4_GL456216_random	35313	35313	T	C	exonic	Dhrsx	.	synonymous SNV	Dhrsx:NM_001368261:exon6:c.T783C:p.R261R,Dhrsx:NM_001368262:exon6:c.T777C:p.R259R,Dhrsx:NM_001033326:exon7:c.T885C:p.R295R	.
chr4_GL456216_random	35328	35328	A	G	exonic	Dhrsx	.	synonymous SNV	Dhrsx:NM_001368261:exon6:c.A798G:p.A266A,Dhrsx:NM_001368262:exon6:c.A792G:p.A264A,Dhrsx:NM_001033326:exon7:c.A900G:p.A300A	.
chr4_GL456216_random	35335	35335	C	T	exonic	Dhrsx	.	synonymous SNV	Dhrsx:NM_001368261:exon6:c.C805T:p.L269L,Dhrsx:NM_001368262:exon6:c.C799T:p.L267L,Dhrsx:NM_001033326:exon7:c.C907T:p.L303L	.
chr4_JH584292_random	3629	3629	G	A	exonic	Vmn2r122	.	synonymous SNV	Vmn2r122:NM_001385246:exon1:c.G9A:p.Q3Q,Vmn2r122:NM_001385247:exon1:c.G9A:p.Q3Q,Vmn2r122:NM_001385250:exon1:c.G9A:p.Q3Q,Vmn2r122:NM_001385252:exon1:c.G9A:p.Q3Q,Vmn2r122:NM_009488:exon1:c.G9A:p.Q3Q,Vmn2r122:NM_009492:exon1:c.G9A:p.Q3Q	.
chr4_JH584292_random	3635	3635	C	T	exonic	Vmn2r122	.	synonymous SNV	Vmn2r122:NM_001385246:exon1:c.C15T:p.C5C,Vmn2r122:NM_001385247:exon1:c.C15T:p.C5C,Vmn2r122:NM_001385250:exon1:c.C15T:p.C5C,Vmn2r122:NM_001385252:exon1:c.C15T:p.C5C,Vmn2r122:NM_009488:exon1:c.C15T:p.C5C,Vmn2r122:NM_009492:exon1:c.C15T:p.C5C	.
chr4_JH584292_random	3636	3636	A	G	exonic	Vmn2r122	.	nonsynonymous SNV	Vmn2r122:NM_001385246:exon1:c.A16G:p.T6A,Vmn2r122:NM_001385247:exon1:c.A16G:p.T6A,Vmn2r122:NM_001385250:exon1:c.A16G:p.T6A,Vmn2r122:NM_001385252:exon1:c.A16G:p.T6A,Vmn2r122:NM_009488:exon1:c.A16G:p.T6A,Vmn2r122:NM_009492:exon1:c.A16G:p.T6A	.
chr4_JH584292_random	3642	3642	A	T	exonic	Vmn2r122	.	nonsynonymous SNV	Vmn2r122:NM_001385246:exon1:c.A22T:p.T8S,Vmn2r122:NM_001385247:exon1:c.A22T:p.T8S,Vmn2r122:NM_001385250:exon1:c.A22T:p.T8S,Vmn2r122:NM_001385252:exon1:c.A22T:p.T8S,Vmn2r122:NM_009488:exon1:c.A22T:p.T8S,Vmn2r122:NM_009492:exon1:c.A22T:p.T8S	.
chr4_JH584292_random	3650	3650	A	T	exonic	Vmn2r122	.	synonymous SNV	Vmn2r122:NM_001385246:exon1:c.A30T:p.S10S,Vmn2r122:NM_001385247:exon1:c.A30T:p.S10S,Vmn2r122:NM_001385250:exon1:c.A30T:p.S10S,Vmn2r122:NM_001385252:exon1:c.A30T:p.S10S,Vmn2r122:NM_009488:exon1:c.A30T:p.S10S,Vmn2r122:NM_009492:exon1:c.A30T:p.S10S	.
chr4_JH584292_random	3678	3678	T	C	exonic	Vmn2r122	.	synonymous SNV	Vmn2r122:NM_001385246:exon1:c.T58C:p.L20L,Vmn2r122:NM_001385247:exon1:c.T58C:p.L20L,Vmn2r122:NM_001385250:exon1:c.T58C:p.L20L,Vmn2r122:NM_001385252:exon1:c.T58C:p.L20L,Vmn2r122:NM_009488:exon1:c.T58C:p.L20L,Vmn2r122:NM_009492:exon1:c.T58C:p.L20L	.
chr4_JH584292_random	3688	3688	G	T	exonic	Vmn2r122	.	nonsynonymous SNV	Vmn2r122:NM_001385246:exon1:c.G68T:p.W23L,Vmn2r122:NM_001385247:exon1:c.G68T:p.W23L,Vmn2r122:NM_001385250:exon1:c.G68T:p.W23L,Vmn2r122:NM_001385252:exon1:c.G68T:p.W23L,Vmn2r122:NM_009488:exon1:c.G68T:p.W23L,Vmn2r122:NM_009492:exon1:c.G68T:p.W23L	.
chr4_JH584292_random	3691	3691	G	C	exonic	Vmn2r122	.	nonsynonymous SNV	Vmn2r122:NM_001385246:exon1:c.G71C:p.S24T,Vmn2r122:NM_001385247:exon1:c.G71C:p.S24T,Vmn2r122:NM_001385250:exon1:c.G71C:p.S24T,Vmn2r122:NM_001385252:exon1:c.G71C:p.S24T,Vmn2r122:NM_009488:exon1:c.G71C:p.S24T,Vmn2r122:NM_009492:exon1:c.G71C:p.S24T	.
chr4_JH584292_random	3701	3701	C	T	exonic	Vmn2r122	.	synonymous SNV	Vmn2r122:NM_001385246:exon1:c.C81T:p.S27S,Vmn2r122:NM_001385247:exon1:c.C81T:p.S27S,Vmn2r122:NM_001385250:exon1:c.C81T:p.S27S,Vmn2r122:NM_001385252:exon1:c.C81T:p.S27S,Vmn2r122:NM_009488:exon1:c.C81T:p.S27S,Vmn2r122:NM_009492:exon1:c.C81T:p.S27S	.
chr4_JH584292_random	3713	3713	G	A	exonic	Vmn2r122	.	synonymous SNV	Vmn2r122:NM_001385246:exon1:c.G93A:p.R31R,Vmn2r122:NM_001385247:exon1:c.G93A:p.R31R,Vmn2r122:NM_001385250:exon1:c.G93A:p.R31R,Vmn2r122:NM_001385252:exon1:c.G93A:p.R31R,Vmn2r122:NM_009488:exon1:c.G93A:p.R31R,Vmn2r122:NM_009492:exon1:c.G93A:p.R31R	.
chr4_JH584292_random	3718	3718	A	G	exonic	Vmn2r122	.	nonsynonymous SNV	Vmn2r122:NM_001385246:exon1:c.A98G:p.K33R,Vmn2r122:NM_001385247:exon1:c.A98G:p.K33R,Vmn2r122:NM_001385250:exon1:c.A98G:p.K33R,Vmn2r122:NM_001385252:exon1:c.A98G:p.K33R,Vmn2r122:NM_009488:exon1:c.A98G:p.K33R,Vmn2r122:NM_009492:exon1:c.A98G:p.K33R	.
chr4_JH584292_random	3722	3722	G	T	exonic	Vmn2r122	.	nonsynonymous SNV	Vmn2r122:NM_001385246:exon1:c.G102T:p.K34N,Vmn2r122:NM_001385247:exon1:c.G102T:p.K34N,Vmn2r122:NM_001385250:exon1:c.G102T:p.K34N,Vmn2r122:NM_001385252:exon1:c.G102T:p.K34N,Vmn2r122:NM_009488:exon1:c.G102T:p.K34N,Vmn2r122:NM_009492:exon1:c.G102T:p.K34N	.
chr4_JH584292_random	3733	3733	A	G	exonic	Vmn2r122	.	nonsynonymous SNV	Vmn2r122:NM_001385246:exon1:c.A113G:p.N38S,Vmn2r122:NM_001385247:exon1:c.A113G:p.N38S,Vmn2r122:NM_001385250:exon1:c.A113G:p.N38S,Vmn2r122:NM_001385252:exon1:c.A113G:p.N38S,Vmn2r122:NM_009488:exon1:c.A113G:p.N38S,Vmn2r122:NM_009492:exon1:c.A113G:p.N38S	.
chr4_JH584292_random	3755	3755	G	A	exonic	Vmn2r122	.	synonymous SNV	Vmn2r122:NM_001385246:exon1:c.G135A:p.E45E,Vmn2r122:NM_001385247:exon1:c.G135A:p.E45E,Vmn2r122:NM_001385250:exon1:c.G135A:p.E45E,Vmn2r122:NM_001385252:exon1:c.G135A:p.E45E,Vmn2r122:NM_009488:exon1:c.G135A:p.E45E,Vmn2r122:NM_009492:exon1:c.G135A:p.E45E	.
chr4_JH584292_random	5747	5747	G	C	exonic	Vmn2r122	.	nonsynonymous SNV	Vmn2r122:NM_001385246:exon2:c.G296C:p.S99T,Vmn2r122:NM_001385247:exon2:c.G296C:p.S99T,Vmn2r122:NM_001385250:exon2:c.G296C:p.S99T,Vmn2r122:NM_001385252:exon2:c.G296C:p.S99T,Vmn2r122:NM_009488:exon2:c.G296C:p.S99T,Vmn2r122:NM_009492:exon2:c.G296C:p.S99T	.
chr4_JH584292_random	5873	5873	C	A	exonic	Vmn2r122	.	nonsynonymous SNV	Vmn2r122:NM_001385246:exon2:c.C422A:p.A141D,Vmn2r122:NM_001385247:exon2:c.C422A:p.A141D,Vmn2r122:NM_001385250:exon2:c.C422A:p.A141D,Vmn2r122:NM_001385252:exon2:c.C422A:p.A141D,Vmn2r122:NM_009488:exon2:c.C422A:p.A141D,Vmn2r122:NM_009492:exon2:c.C422A:p.A141D	.
chr4_JH584292_random	5876	5876	C	T	exonic	Vmn2r122	.	nonsynonymous SNV	Vmn2r122:NM_001385246:exon2:c.C425T:p.T142I,Vmn2r122:NM_001385247:exon2:c.C425T:p.T142I,Vmn2r122:NM_001385250:exon2:c.C425T:p.T142I,Vmn2r122:NM_001385252:exon2:c.C425T:p.T142I,Vmn2r122:NM_009488:exon2:c.C425T:p.T142I,Vmn2r122:NM_009492:exon2:c.C425T:p.T142I	.
chr4_JH584292_random	10729	10729	G	A	exonic	Vmn2r122	.	synonymous SNV	Vmn2r122:NM_009488:exon5:c.G1557A:p.S519S,Vmn2r122:NM_009492:exon5:c.G1662A:p.S554S,Vmn2r122:NM_001385246:exon6:c.G1785A:p.S595S,Vmn2r122:NM_001385247:exon6:c.G1782A:p.S594S	.
chr4_JH584292_random	10745	10745	G	A	exonic	Vmn2r122	.	nonsynonymous SNV	Vmn2r122:NM_009488:exon5:c.G1573A:p.V525I,Vmn2r122:NM_009492:exon5:c.G1678A:p.V560I,Vmn2r122:NM_001385246:exon6:c.G1801A:p.V601I,Vmn2r122:NM_001385247:exon6:c.G1798A:p.V600I	.
chr4_JH584292_random	10800	10800	G	A	exonic	Vmn2r122	.	nonsynonymous SNV	Vmn2r122:NM_009488:exon5:c.G1628A:p.R543H,Vmn2r122:NM_009492:exon5:c.G1733A:p.R578H,Vmn2r122:NM_001385246:exon6:c.G1856A:p.R619H,Vmn2r122:NM_001385247:exon6:c.G1853A:p.R618H	.
chr4_JH584292_random	10801	10801	C	T	exonic	Vmn2r122	.	synonymous SNV	Vmn2r122:NM_009488:exon5:c.C1629T:p.R543R,Vmn2r122:NM_009492:exon5:c.C1734T:p.R578R,Vmn2r122:NM_001385246:exon6:c.C1857T:p.R619R,Vmn2r122:NM_001385247:exon6:c.C1854T:p.R618R	.
chr4_JH584292_random	10894	10894	G	T	exonic	Vmn2r122	.	nonsynonymous SNV	Vmn2r122:NM_009488:exon5:c.G1722T:p.L574F,Vmn2r122:NM_009492:exon5:c.G1827T:p.L609F,Vmn2r122:NM_001385246:exon6:c.G1950T:p.L650F,Vmn2r122:NM_001385247:exon6:c.G1947T:p.L649F	.
chr4_JH584292_random	11349	11349	A	G	exonic	Vmn2r122	.	nonsynonymous SNV	Vmn2r122:NM_009488:exon5:c.A2177G:p.K726R,Vmn2r122:NM_009492:exon5:c.A2282G:p.K761R,Vmn2r122:NM_001385246:exon6:c.A2405G:p.K802R,Vmn2r122:NM_001385247:exon6:c.A2402G:p.K801R	.
chr5	13570208	13570208	A	G	exonic	Sema3a	.	nonsynonymous SNV	Sema3a:NM_009152:exon12:c.A1423G:p.I475V,Sema3a:NM_001243072:exon13:c.A1423G:p.I475V,Sema3a:NM_001243073:exon13:c.A1423G:p.I475V	5qA1
chr5	14913539	14913539	C	G	exonic	Gm9758	.	nonsynonymous SNV	Gm9758:NM_198666:exon2:c.G274C:p.V92L	5qA2
chr5	14913651	14913651	A	G	exonic	Gm9758	.	synonymous SNV	Gm9758:NM_198666:exon2:c.T162C:p.S54S	5qA2
chr5	14914768	14914768	T	G	exonic	Gm9758	.	nonsynonymous SNV	Gm9758:NM_198666:exon1:c.A62C:p.N21T	5qA2
chr5	14976199	14976199	T	C	exonic	Gm10354	.	nonsynonymous SNV	Gm10354:NM_001281514:exon3:c.A443G:p.H148R	5qA2
chr5	15030219	15030219	A	C	exonic	Gm17019	.	nonsynonymous SNV	Gm17019:NM_182957:exon4:c.T578G:p.V193G	5qA2
chr5	15032818	15032818	A	C	exonic	Gm17019	.	nonsynonymous SNV	Gm17019:NM_182957:exon1:c.T121G:p.W41G	5qA2
chr5	15032826	15032826	C	T	exonic	Gm17019	.	nonsynonymous SNV	Gm17019:NM_182957:exon1:c.G113A:p.R38Q	5qA2
chr5	15032910	15032910	A	C	exonic	Gm17019	.	nonsynonymous SNV	Gm17019:NM_182957:exon1:c.T29G:p.L10R	5qA2
chr5	15476412	15476412	G	C	exonic	Gm21149	.	nonsynonymous SNV	Gm21149:NM_001374725:exon1:c.C52G:p.R18G	5qA2
chr5	15524894	15524894	G	A	exonic	Gm21190	.	nonsynonymous SNV	Gm21190:NM_001310449:exon5:c.C725T:p.P242L	5qA2
chr5	15524974	15524974	A	C	exonic	Gm21190	.	nonsynonymous SNV	Gm21190:NM_001310449:exon5:c.T645G:p.D215E	5qA2
chr5	15526580	15526580	G	T	exonic	Gm21190	.	nonsynonymous SNV	Gm21190:NM_001310449:exon3:c.C407A:p.T136N	5qA2
chr5	15577458	15577458	T	G	exonic	Gm21083	.	nonsynonymous SNV	Gm21083:NM_001310450:exon1:c.T122G:p.V41G	5qA2
chr5	15620430	15620430	A	G	exonic	Speer4d	.	nonsynonymous SNV	Speer4d:NM_025759:exon2:c.A152G:p.E51G	5qA2
chr5	15710862	15710862	C	T	exonic	Speer4c	.	synonymous SNV	Speer4c:NM_001281511:exon4:c.G507A:p.Q169Q	5qA2
chr5	15710874	15710874	A	T	exonic	Speer4c	.	synonymous SNV	Speer4c:NM_001281511:exon4:c.T495A:p.S165S	5qA2
chr5	15710891	15710891	G	T	exonic	Speer4c	.	nonsynonymous SNV	Speer4c:NM_001281511:exon4:c.C478A:p.L160I	5qA2
chr5	15714088	15714088	T	G	exonic	Speer4c	.	synonymous SNV	Speer4c:NM_001281511:exon1:c.A115C:p.R39R	5qA2
chr5	25950723	25950723	G	T	exonic	Gm21671	.	nonsynonymous SNV	Gm21671:NM_001281516:exon4:c.C622A:p.H208N	5qB1
chr5	26000324	26000324	C	G	exonic	Gm1979	.	nonsynonymous SNV	Gm1979:NM_001281519:exon5:c.G652C:p.G218R	5qB1
chr5	26004677	26004677	A	G	exonic	Gm1979	.	synonymous SNV	Gm1979:NM_001281519:exon1:c.T51C:p.D17D	5qB1
chr5	26035024	26035024	T	G	exonic	Speer4a	.	nonsynonymous SNV	Speer4a:NM_029376:exon5:c.A727C:p.T243P	5qB1
chr5	26035916	26035916	A	C	exonic	Speer4a	.	nonsynonymous SNV	Speer4a:NM_029376:exon4:c.T577G:p.C193G	5qB1
chr5	26035943	26035943	C	G	exonic	Speer4a	.	nonsynonymous SNV	Speer4a:NM_029376:exon4:c.G550C:p.E184Q	5qB1
chr5	26036709	26036709	A	G	exonic	Speer4a	.	nonsynonymous SNV	Speer4a:NM_029376:exon3:c.T418C:p.F140L	5qB1
chr5	26086487	26086487	A	T	exonic	Gm10471	.	nonsynonymous SNV	Gm10471:NM_001177579:exon3:c.T320A:p.F107Y	5qB1
chr5	26089095	26089095	C	G	exonic	Gm10471	.	nonsynonymous SNV	Gm10471:NM_001177579:exon1:c.G84C:p.W28C	5qB1
chr5	26089122	26089122	A	C	exonic	Gm10471	.	nonsynonymous SNV	Gm10471:NM_001177579:exon1:c.T57G:p.S19R	5qB1
chr5	26089127	26089127	T	C	exonic	Gm10471	.	nonsynonymous SNV	Gm10471:NM_001177579:exon1:c.A52G:p.K18E	5qB1
chr5	27497092	27497092	T	C	exonic	Speer4b	.	synonymous SNV	Speer4b:NM_028561:exon5:c.A669G:p.E223E	5qB1
chr5	27497106	27497106	C	A	exonic	Speer4b	.	nonsynonymous SNV	Speer4b:NM_028561:exon5:c.G655T:p.V219L	5qB1
chr5	27501274	27501274	G	A	exonic	Speer4b	.	nonsynonymous SNV	Speer4b:NM_028561:exon1:c.C94T:p.P32S	5qB1
chr5	34635128	34635128	G	A	exonic	Mfsd10	.	nonsynonymous SNV	Mfsd10:NM_001356978:exon7:c.C728T:p.A243V,Mfsd10:NM_001356979:exon7:c.C728T:p.A243V,Mfsd10:NM_026660:exon7:c.C728T:p.A243V	5qB2
chr5	38300085	38300085	G	C	exonic	Otop1	.	nonsynonymous SNV	Otop1:NM_172709:exon5:c.G1187C:p.G396A	5qB3
chr5	65164670	65164670	G	C	exonic	Klhl5	.	nonsynonymous SNV	Klhl5:NM_001347355:exon10:c.G1618C:p.A540P,Klhl5:NM_175174:exon10:c.G2038C:p.A680P	5qC3.1
chr5	96758142	96758142	T	C	exonic	Fras1	.	nonsynonymous SNV	Fras1:NM_175473:exon62:c.T9404C:p.L3135P	5qE3
chr5	108672113	108672113	T	G	exonic	Slc26a1	.	nonsynonymous SNV	Slc26a1:NM_001310691:exon3:c.A1267C:p.T423P,Slc26a1:NM_001310692:exon3:c.A1219C:p.T407P,Slc26a1:NM_174870:exon3:c.A1219C:p.T407P	5qF
chr5	112762721	112762721	C	T	exonic	Myo18b	.	nonsynonymous SNV	Myo18b:NM_028901:exon36:c.G5804A:p.R1935H	5qF
chr5	137152663	137152663	A	T	exonic	Muc3	.	synonymous SNV	Muc3:NM_010843:exon3:c.T738A:p.G246G	5qG2
chr5	137152664	137152664	C	A	exonic	Muc3	.	nonsynonymous SNV	Muc3:NM_010843:exon3:c.G737T:p.G246V	5qG2
chr5	137152666	137152666	G	A	exonic	Muc3	.	synonymous SNV	Muc3:NM_010843:exon3:c.C735T:p.T245T	5qG2
chr5	137152698	137152698	T	C	exonic	Muc3	.	nonsynonymous SNV	Muc3:NM_010843:exon3:c.A703G:p.K235E	5qG2
chr5	137152710	137152710	T	C	exonic	Muc3	.	nonsynonymous SNV	Muc3:NM_010843:exon3:c.A691G:p.T231A	5qG2
chr5	137152739	137152739	G	T	exonic	Muc3	.	nonsynonymous SNV	Muc3:NM_010843:exon3:c.C662A:p.T221K	5qG2
chr5	137152750	137152750	A	C	exonic	Muc3	.	nonsynonymous SNV	Muc3:NM_010843:exon3:c.T651G:p.D217E	5qG2
chr5	137152765	137152765	G	C	exonic	Muc3	.	nonsynonymous SNV	Muc3:NM_010843:exon3:c.C636G:p.F212L	5qG2
chr5	137152770	137152770	C	A	exonic	Muc3	.	nonsynonymous SNV	Muc3:NM_010843:exon3:c.G631T:p.D211Y	5qG2
chr5	137152775	137152775	T	G	exonic	Muc3	.	nonsynonymous SNV	Muc3:NM_010843:exon3:c.A626C:p.K209T	5qG2
chr5	137152783	137152783	T	G	exonic	Muc3	.	synonymous SNV	Muc3:NM_010843:exon3:c.A618C:p.V206V	5qG2
chr5	137152790	137152790	T	G	exonic	Muc3	.	nonsynonymous SNV	Muc3:NM_010843:exon3:c.A611C:p.D204A	5qG2
chr5	137152793	137152793	G	A	exonic	Muc3	.	nonsynonymous SNV	Muc3:NM_010843:exon3:c.C608T:p.T203M	5qG2
chr5	137152809	137152809	C	A	exonic	Muc3	.	nonsynonymous SNV	Muc3:NM_010843:exon3:c.G592T:p.G198C	5qG2
chr5	137152885	137152885	G	C	exonic	Muc3	.	synonymous SNV	Muc3:NM_010843:exon3:c.C516G:p.P172P	5qG2
chr5	137152889	137152889	G	A	exonic	Muc3	.	nonsynonymous SNV	Muc3:NM_010843:exon3:c.C512T:p.T171I	5qG2
chr5	137152891	137152891	C	G	exonic	Muc3	.	nonsynonymous SNV	Muc3:NM_010843:exon3:c.G510C:p.M170I	5qG2
chr5	137152917	137152917	C	T	exonic	Muc3	.	nonsynonymous SNV	Muc3:NM_010843:exon3:c.G484A:p.A162T	5qG2
chr5	137152925	137152925	A	G	exonic	Muc3	.	nonsynonymous SNV	Muc3:NM_010843:exon3:c.T476C:p.I159T	5qG2
chr5	137152942	137152942	G	C	exonic	Muc3	.	synonymous SNV	Muc3:NM_010843:exon3:c.C459G:p.T153T	5qG2
chr5	138167621	138167621	G	A	exonic	Mcm7	.	synonymous SNV	Mcm7:NM_001356576:exon10:c.C810T:p.I270I,Mcm7:NM_001356577:exon10:c.C810T:p.I270I,Mcm7:NM_008568:exon10:c.C1131T:p.I377I	5qG2
chr5	145465038	145465038	C	T	exonic	Cyp3a16	.	synonymous SNV	Cyp3a16:NM_007820:exon3:c.G213A:p.T71T	5qG2
chr5	145465083	145465083	A	G	exonic	Cyp3a16	.	synonymous SNV	Cyp3a16:NM_007820:exon3:c.T168C:p.G56G	5qG2
chr5	145469571	145469571	G	T	exonic	Cyp3a16	.	synonymous SNV	Cyp3a16:NM_007820:exon1:c.C70A:p.R24R	5qG2
chr5	145469598	145469598	G	A	exonic	Cyp3a16	.	synonymous SNV	Cyp3a16:NM_007820:exon1:c.C43T:p.L15L	5qG2
chr5	145469606	145469606	A	C	exonic	Cyp3a16	.	nonsynonymous SNV	Cyp3a16:NM_007820:exon1:c.T35G:p.L12W	5qG2
chr5	145584570	145584570	G	T	exonic	Cyp3a41a;Cyp3a41b	.	synonymous SNV	Cyp3a41b:NM_001105159:exon1:c.C70A:p.R24R,Cyp3a41a:NM_017396:exon1:c.C70A:p.R24R	5qG2
chr5	145584597	145584597	G	A	exonic	Cyp3a41a;Cyp3a41b	.	synonymous SNV	Cyp3a41b:NM_001105159:exon1:c.C43T:p.L15L,Cyp3a41a:NM_017396:exon1:c.C43T:p.L15L	5qG2
chr5	145584631	145584631	T	C	exonic	Cyp3a41a;Cyp3a41b	.	synonymous SNV	Cyp3a41b:NM_001105159:exon1:c.A9G:p.L3L,Cyp3a41a:NM_017396:exon1:c.A9G:p.L3L	5qG2
chr5	145803665	145803665	G	T	exonic	Cyp3a44	.	nonsynonymous SNV	Cyp3a44:NM_177380:exon2:c.C164A:p.T55K	5qG2
chr5	145803704	145803704	T	G	exonic	Cyp3a44	.	nonsynonymous SNV	Cyp3a44:NM_177380:exon2:c.A125C:p.K42T	5qG2
chr5	145803739	145803739	A	G	exonic	Cyp3a44	.	synonymous SNV	Cyp3a44:NM_177380:exon2:c.T90C:p.H30H	5qG2
chr5	145803757	145803757	T	C	exonic	Cyp3a44	.	synonymous SNV	Cyp3a44:NM_177380:exon2:c.A72G:p.R24R	5qG2
chr6	39400456	39400456	T	A	exonic	Mkrn1	.	nonsynonymous SNV	Mkrn1:NM_001311109:exon6:c.A844T:p.N282Y,Mkrn1:NM_018810:exon6:c.A1036T:p.N346Y	6qB1
chr6	66538966	66538966	G	T	exonic	Mad2l1	.	nonsynonymous SNV	Mad2l1:NM_001355624:exon4:c.G343T:p.V115F,Mad2l1:NM_019499:exon4:c.G343T:p.V115F	6qC1
chr6	116024913	116024913	C	A	exonic	Tmcc1	.	synonymous SNV	Tmcc1:NM_001364577:exon3:c.G564T:p.L188L,Tmcc1:NM_177412:exon5:c.G1524T:p.L508L	6qE3
chr6	116042915	116042915	C	G	exonic	Tmcc1	.	nonsynonymous SNV	Tmcc1:NM_001364577:exon2:c.G495C:p.R165S,Tmcc1:NM_177412:exon4:c.G1455C:p.R485S	6qE3
chr6	124311694	124311694	T	C	exonic	Cd163	.	synonymous SNV	Cd163:NM_001170395:exon5:c.T1083C:p.G361G,Cd163:NM_053094:exon5:c.T1083C:p.G361G	6qF2
chr6	130023682	130023682	A	G	exonic	Klra19;Klra6	.	nonsynonymous SNV	Klra6:NM_008464:exon3:c.T158C:p.L53P,Klra19:NM_053154:exon3:c.T158C:p.L53P	6qF3
chr6	145246710	145246710	A	G	exonic	Kras	.	synonymous SNV	Kras:NM_021284:exon2:c.T96C:p.Y32Y	6qG3
chr7	3222537	3222537	T	C	exonic	Nlrp12	.	nonsynonymous SNV	Nlrp12:NM_001033431:exon10:c.A3101G:p.K1034R	7qA1
chr7	12041359	12041359	G	A	exonic	Vmn1r77	.	nonsynonymous SNV	Vmn1r77:NM_001166731:exon1:c.G61A:p.G21R	7qA1
chr7	12041383	12041383	T	C	exonic	Vmn1r77	.	synonymous SNV	Vmn1r77:NM_001166731:exon1:c.T85C:p.L29L	7qA1
chr7	12041392	12041392	T	C	exonic	Vmn1r77	.	nonsynonymous SNV	Vmn1r77:NM_001166731:exon1:c.T94C:p.Y32H	7qA1
chr7	12041403	12041403	G	A	exonic	Vmn1r77	.	synonymous SNV	Vmn1r77:NM_001166731:exon1:c.G105A:p.L35L	7qA1
chr7	12041476	12041476	A	C	exonic	Vmn1r77	.	nonsynonymous SNV	Vmn1r77:NM_001166731:exon1:c.A178C:p.I60L	7qA1
chr7	12041489	12041489	A	G	exonic	Vmn1r77	.	nonsynonymous SNV	Vmn1r77:NM_001166731:exon1:c.A191G:p.D64G	7qA1
chr7	12041517	12041517	C	A	exonic	Vmn1r77	.	synonymous SNV	Vmn1r77:NM_001166731:exon1:c.C219A:p.G73G	7qA1
chr7	12041524	12041524	A	G	exonic	Vmn1r77	.	nonsynonymous SNV	Vmn1r77:NM_001166731:exon1:c.A226G:p.I76V	7qA1
chr7	12041545	12041545	T	C	exonic	Vmn1r77	.	nonsynonymous SNV	Vmn1r77:NM_001166731:exon1:c.T247C:p.C83R	7qA1
chr7	12041556	12041556	C	T	exonic	Vmn1r77	.	synonymous SNV	Vmn1r77:NM_001166731:exon1:c.C258T:p.I86I	7qA1
chr7	12041557	12041557	A	G	exonic	Vmn1r77	.	nonsynonymous SNV	Vmn1r77:NM_001166731:exon1:c.A259G:p.M87V	7qA1
chr7	12041747	12041747	T	C	exonic	Vmn1r77	.	nonsynonymous SNV	Vmn1r77:NM_001166731:exon1:c.T449C:p.V150A	7qA1
chr7	12041768	12041768	C	A	exonic	Vmn1r77	.	nonsynonymous SNV	Vmn1r77:NM_001166731:exon1:c.C470A:p.S157Y	7qA1
chr7	12041799	12041799	T	C	exonic	Vmn1r77	.	synonymous SNV	Vmn1r77:NM_001166731:exon1:c.T501C:p.Y167Y	7qA1
chr7	12041804	12041804	A	T	exonic	Vmn1r77	.	nonsynonymous SNV	Vmn1r77:NM_001166731:exon1:c.A506T:p.Y169F	7qA1
chr7	12041894	12041894	C	T	exonic	Vmn1r77	.	nonsynonymous SNV	Vmn1r77:NM_001166731:exon1:c.C596T:p.A199V	7qA1
chr7	13801414	13801414	T	C	exonic	Sult2a1	.	nonsynonymous SNV	Sult2a1:NM_001111296:exon5:c.A713G:p.Q238R	7qA1
chr7	13801435	13801435	A	T	exonic	Sult2a1	.	nonsynonymous SNV	Sult2a1:NM_001111296:exon5:c.T692A:p.F231Y	7qA1
chr7	13801470	13801470	A	G	exonic	Sult2a1	.	synonymous SNV	Sult2a1:NM_001111296:exon5:c.T657C:p.S219S	7qA1
chr7	13804036	13804036	T	C	exonic	Sult2a1	.	nonsynonymous SNV	Sult2a1:NM_001111296:exon4:c.A561G:p.I187M	7qA1
chr7	13804051	13804051	C	T	exonic	Sult2a1	.	synonymous SNV	Sult2a1:NM_001111296:exon4:c.G546A:p.L182L	7qA1
chr7	13804060	13804060	A	G	exonic	Sult2a1	.	synonymous SNV	Sult2a1:NM_001111296:exon4:c.T537C:p.F179F	7qA1
chr7	13804096	13804096	A	G	exonic	Sult2a1	.	synonymous SNV	Sult2a1:NM_001111296:exon4:c.T501C:p.V167V	7qA1
chr7	17154802	17154802	T	C	exonic	Ceacam3	.	synonymous SNV	Ceacam3:NM_054059:exon3:c.T495C:p.S165S	7qA2
chr7	24101471	24101471	A	G	exonic	Zfp180	.	synonymous SNV	Zfp180:NM_001289637:exon3:c.A78G:p.V26V,Zfp180:NM_001045486:exon4:c.A150G:p.V50V,Zfp180:NM_001289640:exon4:c.A48G:p.V16V,Zfp180:NM_001289634:exon5:c.A78G:p.V26V	7qA3
chr7	24101503	24101503	T	C	exonic	Zfp180	.	startloss	Zfp180:NM_001289637:exon3:c.T110C:p.M37T,Zfp180:NM_001045486:exon4:c.T182C:p.M61T,Zfp180:NM_001289640:exon4:c.T80C:p.M27T,Zfp180:NM_001289641:exon4:c.T2C:p.M1?,Zfp180:NM_001289634:exon5:c.T110C:p.M37T	7qA3
chr7	24101537	24101537	C	T	exonic	Zfp180	.	synonymous SNV	Zfp180:NM_001289637:exon3:c.C144T:p.T48T,Zfp180:NM_001045486:exon4:c.C216T:p.T72T,Zfp180:NM_001289640:exon4:c.C114T:p.T38T,Zfp180:NM_001289641:exon4:c.C36T:p.T12T,Zfp180:NM_001289634:exon5:c.C144T:p.T48T	7qA3
chr7	24104416	24104416	G	A	exonic	Zfp180	.	nonsynonymous SNV	Zfp180:NM_001289637:exon4:c.G187A:p.V63I,Zfp180:NM_001045486:exon5:c.G259A:p.V87I,Zfp180:NM_001289640:exon5:c.G157A:p.V53I,Zfp180:NM_001289641:exon5:c.G79A:p.V27I,Zfp180:NM_001289634:exon6:c.G187A:p.V63I	7qA3
chr7	24104775	24104775	T	C	exonic	Zfp180	.	synonymous SNV	Zfp180:NM_172483:exon3:c.T93C:p.S31S,Zfp180:NM_001289637:exon4:c.T546C:p.S182S,Zfp180:NM_001045486:exon5:c.T618C:p.S206S,Zfp180:NM_001289640:exon5:c.T516C:p.S172S,Zfp180:NM_001289641:exon5:c.T438C:p.S146S,Zfp180:NM_001289634:exon6:c.T546C:p.S182S	7qA3
chr7	24104830	24104830	C	T	exonic	Zfp180	.	nonsynonymous SNV	Zfp180:NM_172483:exon3:c.C148T:p.R50C,Zfp180:NM_001289637:exon4:c.C601T:p.R201C,Zfp180:NM_001045486:exon5:c.C673T:p.R225C,Zfp180:NM_001289640:exon5:c.C571T:p.R191C,Zfp180:NM_001289641:exon5:c.C493T:p.R165C,Zfp180:NM_001289634:exon6:c.C601T:p.R201C	7qA3
chr7	24104972	24104972	G	A	exonic	Zfp180	.	nonsynonymous SNV	Zfp180:NM_172483:exon3:c.G290A:p.R97H,Zfp180:NM_001289637:exon4:c.G743A:p.R248H,Zfp180:NM_001045486:exon5:c.G815A:p.R272H,Zfp180:NM_001289640:exon5:c.G713A:p.R238H,Zfp180:NM_001289641:exon5:c.G635A:p.R212H,Zfp180:NM_001289634:exon6:c.G743A:p.R248H	7qA3
chr7	24104995	24104995	G	A	exonic	Zfp180	.	nonsynonymous SNV	Zfp180:NM_172483:exon3:c.G313A:p.V105M,Zfp180:NM_001289637:exon4:c.G766A:p.V256M,Zfp180:NM_001045486:exon5:c.G838A:p.V280M,Zfp180:NM_001289640:exon5:c.G736A:p.V246M,Zfp180:NM_001289641:exon5:c.G658A:p.V220M,Zfp180:NM_001289634:exon6:c.G766A:p.V256M	7qA3
chr7	24105180	24105180	A	G	exonic	Zfp180	.	synonymous SNV	Zfp180:NM_172483:exon3:c.A498G:p.T166T,Zfp180:NM_001289637:exon4:c.A951G:p.T317T,Zfp180:NM_001045486:exon5:c.A1023G:p.T341T,Zfp180:NM_001289640:exon5:c.A921G:p.T307T,Zfp180:NM_001289641:exon5:c.A843G:p.T281T,Zfp180:NM_001289634:exon6:c.A951G:p.T317T	7qA3
chr7	24105237	24105237	T	C	exonic	Zfp180	.	synonymous SNV	Zfp180:NM_172483:exon3:c.T555C:p.H185H,Zfp180:NM_001289637:exon4:c.T1008C:p.H336H,Zfp180:NM_001045486:exon5:c.T1080C:p.H360H,Zfp180:NM_001289640:exon5:c.T978C:p.H326H,Zfp180:NM_001289641:exon5:c.T900C:p.H300H,Zfp180:NM_001289634:exon6:c.T1008C:p.H336H	7qA3
chr7	24105281	24105281	G	A	exonic	Zfp180	.	nonsynonymous SNV	Zfp180:NM_172483:exon3:c.G599A:p.R200K,Zfp180:NM_001289637:exon4:c.G1052A:p.R351K,Zfp180:NM_001045486:exon5:c.G1124A:p.R375K,Zfp180:NM_001289640:exon5:c.G1022A:p.R341K,Zfp180:NM_001289641:exon5:c.G944A:p.R315K,Zfp180:NM_001289634:exon6:c.G1052A:p.R351K	7qA3
chr7	24105336	24105336	G	A	exonic	Zfp180	.	synonymous SNV	Zfp180:NM_172483:exon3:c.G654A:p.Q218Q,Zfp180:NM_001289637:exon4:c.G1107A:p.Q369Q,Zfp180:NM_001045486:exon5:c.G1179A:p.Q393Q,Zfp180:NM_001289640:exon5:c.G1077A:p.Q359Q,Zfp180:NM_001289641:exon5:c.G999A:p.Q333Q,Zfp180:NM_001289634:exon6:c.G1107A:p.Q369Q	7qA3
chr7	24105708	24105708	T	C	exonic	Zfp180	.	synonymous SNV	Zfp180:NM_172483:exon3:c.T1026C:p.N342N,Zfp180:NM_001289637:exon4:c.T1479C:p.N493N,Zfp180:NM_001045486:exon5:c.T1551C:p.N517N,Zfp180:NM_001289640:exon5:c.T1449C:p.N483N,Zfp180:NM_001289641:exon5:c.T1371C:p.N457N,Zfp180:NM_001289634:exon6:c.T1479C:p.N493N	7qA3
chr7	24105828	24105828	C	T	exonic	Zfp180	.	synonymous SNV	Zfp180:NM_172483:exon3:c.C1146T:p.L382L,Zfp180:NM_001289637:exon4:c.C1599T:p.L533L,Zfp180:NM_001045486:exon5:c.C1671T:p.L557L,Zfp180:NM_001289640:exon5:c.C1569T:p.L523L,Zfp180:NM_001289641:exon5:c.C1491T:p.L497L,Zfp180:NM_001289634:exon6:c.C1599T:p.L533L	7qA3
chr7	24105867	24105867	C	A	exonic	Zfp180	.	stopgain	Zfp180:NM_172483:exon3:c.C1185A:p.Y395X,Zfp180:NM_001289637:exon4:c.C1638A:p.Y546X,Zfp180:NM_001045486:exon5:c.C1710A:p.Y570X,Zfp180:NM_001289640:exon5:c.C1608A:p.Y536X,Zfp180:NM_001289641:exon5:c.C1530A:p.Y510X,Zfp180:NM_001289634:exon6:c.C1638A:p.Y546X	7qA3
chr7	24105975	24105975	G	A	exonic	Zfp180	.	synonymous SNV	Zfp180:NM_172483:exon3:c.G1293A:p.T431T,Zfp180:NM_001289637:exon4:c.G1746A:p.T582T,Zfp180:NM_001045486:exon5:c.G1818A:p.T606T,Zfp180:NM_001289640:exon5:c.G1716A:p.T572T,Zfp180:NM_001289641:exon5:c.G1638A:p.T546T,Zfp180:NM_001289634:exon6:c.G1746A:p.T582T	7qA3
chr7	26313687	26313687	T	C	exonic	Cyp2a4	.	nonsynonymous SNV	Cyp2a4:NM_009997:exon8:c.T1294C:p.F432L	7qA3
chr7	30185321	30185321	A	G	exonic	Cox7a1	.	nonsynonymous SNV	Cox7a1:NM_009944:exon3:c.A149G:p.N50S	7qB1
chr7	30185324	30185324	T	C	exonic	Cox7a1	.	nonsynonymous SNV	Cox7a1:NM_009944:exon3:c.T152C:p.V51A	7qB1
chr7	38520414	38520414	T	G	exonic	Gm5591	.	nonsynonymous SNV	Gm5591:NM_001013810:exon3:c.A1034C:p.K345T	7qB3
chr7	38520435	38520435	C	T	exonic	Gm5591	.	nonsynonymous SNV	Gm5591:NM_001013810:exon3:c.G1013A:p.R338Q	7qB3
chr7	38520490	38520490	C	T	exonic	Gm5591	.	nonsynonymous SNV	Gm5591:NM_001013810:exon3:c.G958A:p.E320K	7qB3
chr7	38520517	38520517	T	G	exonic	Gm5591	.	nonsynonymous SNV	Gm5591:NM_001013810:exon3:c.A931C:p.M311L	7qB3
chr7	38522092	38522092	A	G	exonic	Gm5591	.	synonymous SNV	Gm5591:NM_001013810:exon2:c.T552C:p.N184N	7qB3
chr7	43187290	43187290	G	A	exonic	Zfp936	.	nonsynonymous SNV	Zfp936:NM_001034893:exon2:c.G124A:p.A42T	7qB3
chr7	43189306	43189306	A	G	exonic	Zfp936	.	nonsynonymous SNV	Zfp936:NM_001034893:exon4:c.A196G:p.K66E	7qB3
chr7	43189310	43189310	T	G	exonic	Zfp936	.	nonsynonymous SNV	Zfp936:NM_001034893:exon4:c.T200G:p.I67S	7qB3
chr7	43189311	43189311	C	A	exonic	Zfp936	.	synonymous SNV	Zfp936:NM_001034893:exon4:c.C201A:p.I67I	7qB3
chr7	43189483	43189483	A	G	exonic	Zfp936	.	nonsynonymous SNV	Zfp936:NM_001034893:exon4:c.A373G:p.N125D	7qB3
chr7	43189489	43189489	G	A	exonic	Zfp936	.	nonsynonymous SNV	Zfp936:NM_001034893:exon4:c.G379A:p.G127R	7qB3
chr7	43189776	43189776	A	C	exonic	Zfp936	.	nonsynonymous SNV	Zfp936:NM_001034893:exon4:c.A666C:p.R222S	7qB3
chr7	43190025	43190025	A	C	exonic	Zfp936	.	nonsynonymous SNV	Zfp936:NM_001034893:exon4:c.A915C:p.Q305H	7qB3
chr7	43190176	43190176	T	C	exonic	Zfp936	.	nonsynonymous SNV	Zfp936:NM_001034893:exon4:c.T1066C:p.Y356H	7qB3
chr7	43190262	43190262	C	G	exonic	Zfp936	.	nonsynonymous SNV	Zfp936:NM_001034893:exon4:c.C1152G:p.H384Q	7qB3
chr7	43190388	43190388	G	A	exonic	Zfp936	.	synonymous SNV	Zfp936:NM_001034893:exon4:c.G1278A:p.E426E	7qB3
chr7	43190467	43190467	G	A	exonic	Zfp936	.	nonsynonymous SNV	Zfp936:NM_001034893:exon4:c.G1357A:p.G453R	7qB3
chr7	43225716	43225716	A	G	exonic	EU599041	.	nonsynonymous SNV	EU599041:NM_001177525:exon4:c.A196G:p.K66E	7qB3
chr7	43225720	43225720	T	G	exonic	EU599041	.	nonsynonymous SNV	EU599041:NM_001177525:exon4:c.T200G:p.I67S	7qB3
chr7	43225721	43225721	C	A	exonic	EU599041	.	synonymous SNV	EU599041:NM_001177525:exon4:c.C201A:p.I67I	7qB3
chr7	43225829	43225829	G	T	exonic	EU599041	.	synonymous SNV	EU599041:NM_001177525:exon4:c.G309T:p.S103S	7qB3
chr7	43225857	43225857	A	G	exonic	EU599041	.	nonsynonymous SNV	EU599041:NM_001177525:exon4:c.A337G:p.T113A	7qB3
chr7	43225874	43225874	C	A	exonic	EU599041	.	synonymous SNV	EU599041:NM_001177525:exon4:c.C354A:p.L118L	7qB3
chr7	43225940	43225940	T	C	exonic	EU599041	.	synonymous SNV	EU599041:NM_001177525:exon4:c.T420C:p.F140F	7qB3
chr7	43225962	43225962	C	G	exonic	EU599041	.	nonsynonymous SNV	EU599041:NM_001177525:exon4:c.C442G:p.L148V	7qB3
chr7	43225975	43225975	T	C	exonic	EU599041	.	nonsynonymous SNV	EU599041:NM_001177525:exon4:c.T455C:p.I152T	7qB3
chr7	43225977	43225977	T	C	exonic	EU599041	.	nonsynonymous SNV	EU599041:NM_001177525:exon4:c.T457C:p.Y153H	7qB3
chr7	43225985	43225985	G	A	exonic	EU599041	.	synonymous SNV	EU599041:NM_001177525:exon4:c.G465A:p.G155G	7qB3
chr7	56131292	56131292	G	A	exonic	Herc2	.	nonsynonymous SNV	Herc2:NM_001360080:exon24:c.G3704A:p.G1235D,Herc2:NM_010418:exon24:c.G3704A:p.G1235D	7qB5
chr7	79111322	79111322	T	C	exonic	Acan	.	synonymous SNV	Acan:NM_007424:exon13:c.T5781C:p.T1927T,Acan:NM_001361500:exon14:c.T5895C:p.T1965T	7qD2
chr7	92858589	92858589	G	A	exonic	Ddias	.	nonsynonymous SNV	Ddias:NM_001355126:exon6:c.C2117T:p.P706L,Ddias:NM_001080995:exon7:c.C2117T:p.P706L,Ddias:NM_001368705:exon7:c.C2117T:p.P706L	7qE1
chr7	97417057	97417057	A	G	exonic	Thrsp	.	synonymous SNV	Thrsp:NM_009381:exon1:c.T447C:p.V149V	7qE1
chr7	106944970	106944970	C	T	exonic	Olfr710	.	synonymous SNV	Olfr710:NM_146601:exon2:c.G30A:p.T10T	7qE3
chr7	108465371	108465371	T	A	exonic	Olfr498	.	nonsynonymous SNV	Olfr498:NM_146307:exon1:c.T46A:p.F16I	7qE3
chr7	120135179	120135179	G	A	exonic	Zp2	.	nonsynonymous SNV	Zp2:NM_001374631:exon14:c.C1646T:p.A549V,Zp2:NM_011775:exon14:c.C1646T:p.A549V	7qF2
chr7	122167650	122167650	C	T	exonic	Plk1	.	nonsynonymous SNV	Plk1:NM_011121:exon6:c.C1090T:p.R364W	7qF2
chr7	131138956	131138956	A	G	exonic	4933402N03Rik	.	nonsynonymous SNV	4933402N03Rik:NM_173409:exon3:c.T530C:p.M177T	7qF3
chr7	141638141	141638141	G	C	exonic	Muc6	.	nonsynonymous SNV	Muc6:NM_001368953:exon31:c.C6303G:p.H2101Q	7qF5
chr7	141638400	141638400	G	A	exonic	Muc6	.	nonsynonymous SNV	Muc6:NM_001368953:exon31:c.C6044T:p.S2015F	7qF5
chr7	141638697	141638697	G	T	exonic	Muc6	.	nonsynonymous SNV	Muc6:NM_001368953:exon31:c.C5747A:p.T1916K	7qF5
chr7	141638772	141638772	G	T	exonic	Muc6	.	nonsynonymous SNV	Muc6:NM_001368953:exon31:c.C5672A:p.T1891N	7qF5
chr7	141638786	141638786	A	T	exonic	Muc6	.	synonymous SNV	Muc6:NM_001368953:exon31:c.T5658A:p.P1886P	7qF5
chr7	141638789	141638789	A	C	exonic	Muc6	.	synonymous SNV	Muc6:NM_001368953:exon31:c.T5655G:p.T1885T	7qF5
chr7	141638805	141638805	C	A	exonic	Muc6	.	nonsynonymous SNV	Muc6:NM_001368953:exon31:c.G5639T:p.G1880V	7qF5
chr7	141638872	141638872	G	0	exonic	Muc6	.	.	.	7qF5
chr7	141638872	141638872	G	A	exonic	Muc6	.	nonsynonymous SNV	Muc6:NM_001368953:exon31:c.C5572T:p.P1858S	7qF5
chr7	141638890	141638890	C	0	exonic	Muc6	.	.	.	7qF5
chr7	141638890	141638890	C	T	exonic	Muc6	.	nonsynonymous SNV	Muc6:NM_001368953:exon31:c.G5554A:p.A1852T	7qF5
chr7	141639167	141639167	G	C	exonic	Muc6	.	nonsynonymous SNV	Muc6:NM_001368953:exon31:c.C5277G:p.H1759Q	7qF5
chr7	141639531	141639531	G	A	exonic	Muc6	.	nonsynonymous SNV	Muc6:NM_001368953:exon31:c.C4913T:p.T1638M	7qF5
chr7	141858445	141858445	T	A	exonic	Muc5b	.	synonymous SNV	Muc5b:NM_028801:exon31:c.T5127A:p.S1709S	7qF5
chr7	141858623	141858623	T	C	exonic	Muc5b	.	nonsynonymous SNV	Muc5b:NM_028801:exon31:c.T5305C:p.Y1769H	7qF5
chr7	141858787	141858787	C	T	exonic	Muc5b	.	synonymous SNV	Muc5b:NM_028801:exon31:c.C5469T:p.S1823S	7qF5
chr7	141858900	141858900	T	C	exonic	Muc5b	.	nonsynonymous SNV	Muc5b:NM_028801:exon31:c.T5582C:p.F1861S	7qF5
chr8	19749431	19749431	C	A	exonic	4930467E23Rik	.	synonymous SNV	4930467E23Rik:NM_001039553:exon8:c.C894A:p.P298P	8qA1.3
chr8	19749432	19749432	G	A	exonic	4930467E23Rik	.	nonsynonymous SNV	4930467E23Rik:NM_001039553:exon8:c.G895A:p.G299R	8qA1.3
chr8	26158469	26158469	G	T	exonic	Thap1	.	nonsynonymous SNV	Thap1:NM_199042:exon1:c.G19T:p.A7S	8qA2
chr8	26158472	26158472	T	C	exonic	Thap1	.	nonsynonymous SNV	Thap1:NM_199042:exon1:c.T22C:p.Y8H	8qA2
chr8	26158474	26158474	C	A	exonic	Thap1	.	stopgain	Thap1:NM_199042:exon1:c.C24A:p.Y8X	8qA2
chr8	26158488	26158488	G	A	exonic	Thap1	.	nonsynonymous SNV	Thap1:NM_199042:exon1:c.G38A:p.R13H	8qA2
chr8	26158492	26158492	C	T	exonic	Thap1	.	synonymous SNV	Thap1:NM_199042:exon1:c.C42T:p.Y14Y	8qA2
chr8	26158493	26158493	G	A	exonic	Thap1	.	nonsynonymous SNV	Thap1:NM_199042:exon1:c.G43A:p.D15N	8qA2
chr8	26158507	26158507	C	G	exonic	Thap1	.	synonymous SNV	Thap1:NM_199042:exon1:c.C57G:p.P19P	8qA2
chr8	26160882	26160882	C	T	exonic	Thap1	.	nonsynonymous SNV	Thap1:NM_199042:exon2:c.C179T:p.P60L	8qA2
chr8	26160946	26160946	T	C	exonic	Thap1	.	synonymous SNV	Thap1:NM_199042:exon2:c.T243C:p.F81F	8qA2
chr8	26162463	26162463	C	T	exonic	Thap1	.	synonymous SNV	Thap1:NM_199042:exon3:c.C297T:p.L99L	8qA2
chr8	26162470	26162470	C	G	exonic	Thap1	.	nonsynonymous SNV	Thap1:NM_199042:exon3:c.C304G:p.P102A	8qA2
chr8	26162498	26162498	C	G	exonic	Thap1	.	nonsynonymous SNV	Thap1:NM_199042:exon3:c.C332G:p.A111G	8qA2
chr8	26162526	26162526	G	C	exonic	Thap1	.	synonymous SNV	Thap1:NM_199042:exon3:c.G360C:p.L120L	8qA2
chr8	26162544	26162544	G	C	exonic	Thap1	.	synonymous SNV	Thap1:NM_199042:exon3:c.G378C:p.L126L	8qA2
chr8	26162566	26162566	T	G	exonic	Thap1	.	nonsynonymous SNV	Thap1:NM_199042:exon3:c.T400G:p.Y134D	8qA2
chr8	26162583	26162583	G	A	exonic	Thap1	.	synonymous SNV	Thap1:NM_199042:exon3:c.G417A:p.T139T	8qA2
chr8	26162607	26162607	G	T	exonic	Thap1	.	synonymous SNV	Thap1:NM_199042:exon3:c.G441T:p.L147L	8qA2
chr8	26162631	26162631	A	G	exonic	Thap1	.	synonymous SNV	Thap1:NM_199042:exon3:c.A465G:p.K155K	8qA2
chr8	26162652	26162652	G	T	exonic	Thap1	.	synonymous SNV	Thap1:NM_199042:exon3:c.G486T:p.T162T	8qA2
chr8	26162672	26162672	G	A	exonic	Thap1	.	nonsynonymous SNV	Thap1:NM_199042:exon3:c.G506A:p.R169Q	8qA2
chr8	26162688	26162688	C	T	exonic	Thap1	.	synonymous SNV	Thap1:NM_199042:exon3:c.C522T:p.L174L	8qA2
chr8	26162706	26162706	C	G	exonic	Thap1	.	synonymous SNV	Thap1:NM_199042:exon3:c.C540G:p.V180V	8qA2
chr8	26162731	26162731	G	A	exonic	Thap1	.	nonsynonymous SNV	Thap1:NM_199042:exon3:c.G565A:p.D189N	8qA2
chr8	26162757	26162757	C	T	exonic	Thap1	.	synonymous SNV	Thap1:NM_199042:exon3:c.C591T:p.I197I	8qA2
chr8	66513162	66513162	C	A	exonic	Tktl2	.	synonymous SNV	Tktl2:NM_001271574:exon1:c.C1371A:p.V457V,Tktl2:NM_028927:exon1:c.C1371A:p.V457V	8qB3.1
chr8	71143231	71143231	G	A	exonic	Gm7827	.	synonymous SNV	Gm7827:NM_001324526:exon3:c.G159A:p.K53K	8qB3.3
chr8	71170659	71170659	T	C	exonic	Gm7827	.	nonsynonymous SNV	Gm7827:NM_001324526:exon10:c.T1073C:p.L358P	8qB3.3
chr8	71171352	71171352	T	A	exonic	Gm7827	.	nonsynonymous SNV	Gm7827:NM_001324526:exon11:c.T1220A:p.L407H	8qB3.3
chr8	117113432	117113432	T	C	exonic	Bco1	.	synonymous SNV	Bco1:NM_001163028:exon6:c.T688C:p.L230L,Bco1:NM_021486:exon6:c.T688C:p.L230L	8qE1
chr8	122890181	122890181	C	G	exonic	Ankrd11	.	nonsynonymous SNV	Ankrd11:NM_001081379:exon9:c.G6868C:p.V2290L	8qE1
chr8	129283351	129283351	A	G	exonic	Gm32856	.	nonsynonymous SNV	Gm32856:NM_001346808:exon4:c.A1067G:p.E356G,Gm32856:NM_001376966:exon5:c.A971G:p.E324G	8qE2
chr9	20823368	20823368	C	T	exonic	Rdh8	.	synonymous SNV	Rdh8:NM_001030290:exon3:c.C330T:p.S110S	9qA3
chr9	25130622	25130622	C	G	exonic	Herpud2	.	nonsynonymous SNV	Herpud2:NM_020586:exon3:c.G253C:p.V85L	9qA4
chr9	44796509	44796509	A	G	exonic	Tmem25	.	nonsynonymous SNV	Tmem25:NM_001357385:exon3:c.T488C:p.V163A,Tmem25:NM_001357386:exon3:c.T488C:p.V163A,Tmem25:NM_001357383:exon4:c.T560C:p.V187A,Tmem25:NM_001357384:exon4:c.T488C:p.V163A,Tmem25:NM_027865:exon4:c.T488C:p.V163A	9qA5.2
chr9	44942695	44942695	T	A	exonic	Ube4a	.	nonsynonymous SNV	Ube4a:NM_001346698:exon12:c.A1804T:p.N602Y,Ube4a:NM_145400:exon12:c.A1747T:p.N583Y,Ube4a:NM_001361076:exon13:c.A1516T:p.N506Y	9qA5.2
chr9	78367831	78367831	G	T	exonic	Dppa5a	.	nonsynonymous SNV	Dppa5a:NM_025274:exon2:c.C188A:p.S63Y	9qE1
chr9	78367833	78367833	T	C	exonic	Dppa5a	.	synonymous SNV	Dppa5a:NM_025274:exon2:c.A186G:p.E62E	9qE1
chr9	78367870	78367870	T	A	exonic	Dppa5a	.	nonsynonymous SNV	Dppa5a:NM_025274:exon2:c.A149T:p.Q50L	9qE1
chr9	78367875	78367875	G	A	exonic	Dppa5a	.	synonymous SNV	Dppa5a:NM_025274:exon2:c.C144T:p.I48I	9qE1
chr9	109145537	109145537	T	C	exonic	Fbxw21	.	nonsynonymous SNV	Fbxw21:NM_001382229:exon7:c.A914G:p.H305R,Fbxw21:NM_177069:exon7:c.A914G:p.H305R	9qF2
chr9	120016907	120016907	T	G	exonic	Xirp1	.	nonsynonymous SNV	Xirp1:NM_011724:exon2:c.A2909C:p.Q970P	9qF4
chrX	37805131	37805131	A	G	exonic	Rhox5	.	synonymous SNV	Rhox5:NM_008818:exon3:c.A105G:p.Q35Q	XqA3.3
chrX	53690824	53690824	A	G	exonic	4933416I08Rik	.	unknown	UNKNOWN	XqA5
chrX	53690930	53690930	T	C	exonic	4933416I08Rik	.	unknown	UNKNOWN	XqA5
chrX	53691000	53691000	G	C	exonic	4933416I08Rik	.	unknown	UNKNOWN	XqA5
chrX	53691001	53691001	G	C	exonic	4933416I08Rik	.	unknown	UNKNOWN	XqA5
chrX	53691003	53691003	G	A	exonic	4933416I08Rik	.	unknown	UNKNOWN	XqA5
chrX	53691024	53691024	G	A	exonic	4933416I08Rik	.	unknown	UNKNOWN	XqA5
chrX	57066460	57066460	A	T	exonic	Htatsf1	.	nonsynonymous SNV	Htatsf1:NM_029371:exon9:c.A1880T:p.E627V,Htatsf1:NM_028242:exon10:c.A1880T:p.E627V	XqA6
chrX	73175468	73175468	C	G	exonic	Spin2d	.	nonsynonymous SNV	Spin2d:NM_001243002:exon2:c.G595C:p.G199R	XqA7.3
chrX	73175475	73175475	A	T	exonic	Spin2d	.	nonsynonymous SNV	Spin2d:NM_001243002:exon2:c.T588A:p.N196K	XqA7.3
chrX	73175478	73175478	T	G	exonic	Spin2d	.	synonymous SNV	Spin2d:NM_001243002:exon2:c.A585C:p.T195T	XqA7.3
chrX	124132260	124132260	G	A	exonic	Vmn2r121	.	nonsynonymous SNV	Vmn2r121:NM_001100616:exon3:c.C1199T:p.A400V	XqE3
chrX	124132268	124132268	A	C	exonic	Vmn2r121	.	synonymous SNV	Vmn2r121:NM_001100616:exon3:c.T1191G:p.A397A	XqE3
chrX	124132274	124132274	A	G	exonic	Vmn2r121	.	synonymous SNV	Vmn2r121:NM_001100616:exon3:c.T1185C:p.Y395Y	XqE3
chrX	124132301	124132301	G	C	exonic	Vmn2r121	.	synonymous SNV	Vmn2r121:NM_001100616:exon3:c.C1158G:p.A386A	XqE3
chrX	124132352	124132352	C	A	exonic	Vmn2r121	.	nonsynonymous SNV	Vmn2r121:NM_001100616:exon3:c.G1107T:p.M369I	XqE3
chrX	124132360	124132360	C	G	exonic	Vmn2r121	.	nonsynonymous SNV	Vmn2r121:NM_001100616:exon3:c.G1099C:p.D367H	XqE3
chrX	124132365	124132365	T	C	exonic	Vmn2r121	.	nonsynonymous SNV	Vmn2r121:NM_001100616:exon3:c.A1094G:p.K365R	XqE3
chrX	124132368	124132368	C	A	exonic	Vmn2r121	.	nonsynonymous SNV	Vmn2r121:NM_001100616:exon3:c.G1091T:p.S364I	XqE3
chrX	124132383	124132383	A	C	exonic	Vmn2r121	.	nonsynonymous SNV	Vmn2r121:NM_001100616:exon3:c.T1076G:p.I359S	XqE3
chrX	124132406	124132406	C	T	exonic	Vmn2r121	.	synonymous SNV	Vmn2r121:NM_001100616:exon3:c.G1053A:p.E351E	XqE3
chrX	124132411	124132411	A	G	exonic	Vmn2r121	.	synonymous SNV	Vmn2r121:NM_001100616:exon3:c.T1048C:p.L350L	XqE3
chrX	124132443	124132443	G	A	exonic	Vmn2r121	.	nonsynonymous SNV	Vmn2r121:NM_001100616:exon3:c.C1016T:p.A339V	XqE3
chrX	124133662	124133662	A	G	exonic	Vmn2r121	.	nonsynonymous SNV	Vmn2r121:NM_001100616:exon2:c.T271C:p.S91P	XqE3
chrX	124133675	124133675	T	C	exonic	Vmn2r121	.	synonymous SNV	Vmn2r121:NM_001100616:exon2:c.A258G:p.E86E	XqE3
chrX	124133693	124133693	G	C	exonic	Vmn2r121	.	nonsynonymous SNV	Vmn2r121:NM_001100616:exon2:c.C240G:p.I80M	XqE3
chrX	124133716	124133716	C	T	exonic	Vmn2r121	.	nonsynonymous SNV	Vmn2r121:NM_001100616:exon2:c.G217A:p.E73K	XqE3
chrX	124133726	124133726	A	T	exonic	Vmn2r121	.	synonymous SNV	Vmn2r121:NM_001100616:exon2:c.T207A:p.I69I	XqE3
chrX	150572185	150572185	A	G	exonic	Apex2	.	synonymous SNV	Apex2:NM_029943:exon6:c.T1134C:p.L378L	XqF3
