# Supplementary material for: Novel CRISPR-Cas9 BAP1 Knockout Pre-Clinical Tumor Model Recapitulates Human Melanoma Tumorigenesis and Immune Evolution
Source: Research Square preprint supplement (doi:10.21203/rs.3.rs-6134890/v1), 2025-04-09
Supplement: Supplementary file 3 [file 5704c50e828a4b8d6d1f0159.xlsx]

## Sheet: indels_protein_coding_region
Chr	Start	End	Ref	Alt	Func.refGene	Gene.refGene	GeneDetail.refGene	ExonicFunc.refGene	AAChange.refGene	cytoBand
chr1	4346510	4346510	-	T	exonic	Rp1	.	frameshift insertion	Rp1:NM_011283:exon4:c.4377dupA:p.S1460Ifs*13	1qA1
chr1	6249018	6249018	-	T	exonic	Rb1cc1	.	frameshift insertion	Rb1cc1:NM_009826:exon15:c.2661dupT:p.V888Cfs*3	1qA1
chr1	9546104	9546105	CT	-	exonic	Rrs1	.	frameshift deletion	Rrs1:NM_021511:exon1:c.581_582del:p.H197Qfs*18	1qA2
chr1	19234347	19234347	A	-	exonic	Tfap2b	.	nonframeshift deletion	Tfap2b:NM_001025305:exon7:c.1326delA:p.X442X,Tfap2b:NM_009334:exon7:c.1380delA:p.X460X	1qA3
chr1	39988999	39989001	GAG	-	exonic	Map4k4	.	nonframeshift deletion	Map4k4:NM_001252200:exon11:c.979_981del:p.E332del,Map4k4:NM_001252201:exon11:c.979_981del:p.E332del,Map4k4:NM_001252202:exon11:c.979_981del:p.E332del,Map4k4:NM_008696:exon11:c.979_981del:p.E332del	1qB
chr1	40681921	40681923	GCT	-	exonic	Slc9a2	.	nonframeshift deletion	Slc9a2:NM_001033289:exon1:c.48_50del:p.L22del	1qB
chr1	64937782	64937784	CTG	-	exonic	Plekhm3	.	nonframeshift deletion	Plekhm3:NM_001039493:exon2:c.526_528del:p.Q176del	1qC2
chr1	85248321	85248321	-	T	exonic	C130026I21Rik	.	frameshift insertion	C130026I21Rik:NM_001037909:exon6:c.569dupA:p.P191Afs*5,C130026I21Rik:NM_175219:exon7:c.653dupA:p.P219Afs*5	1qC5
chr1	85610809	85610811	AGA	-	exonic	Sp140	.	nonframeshift deletion	Sp140:NM_001013817:exon3:c.266_268del:p.K91del	1qC5
chr1	85630470	85630470	A	-	exonic	Sp140	.	frameshift deletion	Sp140:NM_001013817:exon9:c.735delA:p.R245Sfs*16	1qC5
chr1	88212372	88212372	T	-	exonic	Ugt1a1	.	frameshift deletion	Ugt1a1:NM_201645:exon1:c.371delT:p.M124Sfs*3	1qD
chr1	88216158	88216158	T	-	exonic	Ugt1a1;Ugt1a10;Ugt1a2;Ugt1a5;Ugt1a6a;Ugt1a6b;Ugt1a7c;Ugt1a8;Ugt1a9	.	frameshift deletion	Ugt1a8:NM_001378375:exon4:c.1096delT:p.F366Sfs*21,Ugt1a2:NM_013701:exon4:c.1105delT:p.F369Sfs*21,Ugt1a10:NM_201641:exon4:c.1096delT:p.F366Sfs*21,Ugt1a7c:NM_201642:exon4:c.1099delT:p.F367Sfs*21,Ugt1a5:NM_201643:exon4:c.1093delT:p.F365Sfs*21,Ugt1a9:NM_201644:exon4:c.1090delT:p.F364Sfs*21,Ugt1a1:NM_201645:exon4:c.1111delT:p.F371Sfs*21,Ugt1a6a:NM_145079:exon5:c.1099delT:p.F367Sfs*21,Ugt1a6b:NM_201410…	1qD
chr1	88216161	88216162	AT	-	exonic	Ugt1a1;Ugt1a10;Ugt1a2;Ugt1a5;Ugt1a6a;Ugt1a6b;Ugt1a7c;Ugt1a8;Ugt1a9	.	frameshift deletion	Ugt1a8:NM_001378375:exon4:c.1099_1100del:p.I367Hfs*10,Ugt1a2:NM_013701:exon4:c.1108_1109del:p.I370Hfs*10,Ugt1a10:NM_201641:exon4:c.1099_1100del:p.I367Hfs*10,Ugt1a7c:NM_201642:exon4:c.1102_1103del:p.I368Hfs*10,Ugt1a5:NM_201643:exon4:c.1096_1097del:p.I366Hfs*10,Ugt1a9:NM_201644:exon4:c.1093_1094del:p.I365Hfs*10,Ugt1a1:NM_201645:exon4:c.1114_1115del:p.I372Hfs*10,Ugt1a6a:NM_145079:exon5:c.1102_1103de…	1qD
chr1	88218255	88218255	C	-	exonic	Ugt1a1;Ugt1a10;Ugt1a2;Ugt1a5;Ugt1a6a;Ugt1a6b;Ugt1a7c;Ugt1a8;Ugt1a9	.	frameshift deletion	Ugt1a8:NM_001378375:exon5:c.1424delC:p.H476Mfs*13,Ugt1a2:NM_013701:exon5:c.1433delC:p.H479Mfs*13,Ugt1a10:NM_201641:exon5:c.1424delC:p.H476Mfs*13,Ugt1a7c:NM_201642:exon5:c.1427delC:p.H477Mfs*13,Ugt1a5:NM_201643:exon5:c.1421delC:p.H475Mfs*13,Ugt1a9:NM_201644:exon5:c.1418delC:p.H474Mfs*13,Ugt1a1:NM_201645:exon5:c.1439delC:p.H481Mfs*13,Ugt1a6a:NM_145079:exon6:c.1427delC:p.H477Mfs*13,Ugt1a6b:NM_201410…	1qD
chr1	88232258	88232259	CC	-	exonic	Mroh2a	.	frameshift deletion	Mroh2a:NM_001281466:exon6:c.571_572del:p.P191Lfs*27	1qD
chr1	88237911	88237921	GATACTGTAAA	-	exonic	Mroh2a	.	frameshift deletion	Mroh2a:NM_001281466:exon14:c.1501_1511del:p.T502Hfs*11	1qD
chr1	88256166	88256166	-	T	exonic	Mroh2a	.	frameshift insertion	Mroh2a:NM_001281466:exon35:c.4100dupT:p.E1368Rfs*31	1qD
chr1	88266279	88266329	CTGGGAGGGCTTGCTCCGGGGGCAGTGTGTCCTGTTCTTGTGCAGCCCCTG	-	exonic	A730008H23Rik;Hjurp	.	nonframeshift deletion	A730008H23Rik:NM_172505:exon5:c.628_678del:p.Q210_Q226del,Hjurp:NM_198652:exon8:c.856_906del:p.Q286_Q302del	1qD
chr1	88266524	88266524	-	T	exonic	A730008H23Rik;Hjurp	.	frameshift insertion	A730008H23Rik:NM_172505:exon5:c.432dupA:p.L145Tfs*14,Hjurp:NM_198652:exon8:c.660dupA:p.L221Tfs*14	1qD
chr1	91115531	91115536	AAGAAC	-	exonic	Lrrfip1	.	nonframeshift deletion	Lrrfip1:NM_001111311:exon8:c.1657_1662del:p.N554_K555del	1qD
chr1	107524738	107524738	-	T	exonic	Serpinb2	.	frameshift insertion	Serpinb2:NM_001174170:exon8:c.1046dupT:p.L351Sfs*3,Serpinb2:NM_011111:exon8:c.1046dupT:p.L351Sfs*3	1qE2.1
chr1	120036407	120036407	T	-	exonic	Sctr	.	frameshift deletion	Sctr:NM_001311077:exon4:c.371delT:p.V124Afs*3,Sctr:NM_001012322:exon5:c.416delT:p.V139Afs*3	1qE2.3
chr1	125572485	125572485	-	T	exonic	Slc35f5	.	frameshift insertion	Slc35f5:NM_001356294:exon7:c.802dupT:p.C271Lfs*44,Slc35f5:NM_028787:exon7:c.736dupT:p.C249Lfs*44	1qE2.3
chr1	171356617	171356702	AGGTAGGAAGGCCGCAGAGAAACAGAGTGATTGGATGGAGGCTTGTGGGGATCAGGACGCATTCTGAGGTCTTGTTCTCCTACCCT	-	exonic	Pfdn2	.	frameshift deletion	Pfdn2:NM_001360824:exon2:c.163_164del:p.S55Pfs*11,Pfdn2:NM_001360825:exon2:c.19_20del:p.S7Pfs*11,Pfdn2:NM_011070:exon2:c.163_164del:p.S55Pfs*11	1qH3
chr10	58477972	58477972	-	GTTTGTGCTCG	exonic	Ranbp2	.	frameshift insertion	Ranbp2:NM_011240:exon20:c.4513_4514insGTTTGTGCTCG:p.K1510Cfs*4	10qB4
chr10	97694371	97694373	GAG	-	exonic	Ccer1	.	nonframeshift deletion	Ccer1:NM_025724:exon1:c.895_897del:p.E305del	10qC3
chr10	100341500	100341502	GCA	-	exonic	Gm4303;Gm4305;Gm4307	.	frameshift deletion	Gm4303:NM_001166638:exon1:c.645delG:p.Q216Sfs*57,Gm4305:NM_001166639:exon1:c.645delG:p.Q216Sfs*57,Gm4307:NM_001166641:exon1:c.645delG:p.Q216Sfs*57	10qD1
chr11	3977720	3977722	GGA	-	exonic	Pes1	.	nonframeshift deletion	Pes1:NM_022889:exon13:c.1446_1448del:p.E489del	11qA1
chr11	6605638	6605639	GG	-	exonic	Nacad	.	frameshift deletion	Nacad:NM_001081652:exon1:c.110_111del:p.P37Qfs*40	11qA1
chr11	6605639	6605639	G	-	exonic	Nacad	.	frameshift deletion	Nacad:NM_001081652:exon1:c.110delC:p.S38Afs*14	11qA1
chr11	41971907	41971907	-	A	exonic	Gabrg2	.	frameshift insertion	Gabrg2:NM_008073:exon4:c.348dupT:p.A117Cfs*6,Gabrg2:NM_177408:exon4:c.348dupT:p.A117Cfs*6,Gabrg2:NM_001362655:exon5:c.294dupT:p.A99Cfs*6,Gabrg2:NM_001362656:exon5:c.291dupT:p.A98Cfs*6	11qA5
chr11	73073261	73073263	GAG	-	exonic	Ncbp3	.	nonframeshift deletion	Ncbp3:NM_025818:exon10:c.1036_1038del:p.E354del	11qB4
chr11	80471550	80471550	-	TC	exonic	Psmd11	.	frameshift insertion	Psmd11:NM_178616:exon13:c.1225_1226insTC:p.K409Ifs*3	11qB5
chr11	100464142	100464143	TC	-	exonic	Klhl11	.	frameshift deletion	Klhl11:NM_172565:exon2:c.851_852del:p.R284Ifs*3	11qD
chr11	116274035	116274035	-	CCGCCG	exonic	Srp68	.	nonframeshift insertion	Srp68:NM_146032:exon1:c.71_72insCGGCGG:p.G25_S26insGG	11qE2
chr11	121575313	121575313	A	-	exonic	Tbcd	.	frameshift deletion	Tbcd:NM_029878:exon19:c.1764delA:p.L589Cfs*4	11qE2
chr12	8324049	8324051	GAG	-	exonic	Hs1bp3	.	nonframeshift deletion	Hs1bp3:NM_021429:exon4:c.586_588del:p.E204del	12qA1.1
chr12	24215288	24215288	-	TTGGAGATAACTGTGACCTGCAAAGGCTTTACCACATTGATTACATTCATAGGGTTTCTCTCCAGTATGTGTTCTTTTATGACG	exonic	Gm21297	.	nonframeshift insertion	Gm21297:NM_001384261:exon4:c.984_985insCGTCATAAAAGAACACATACTGGAGAGAAACCCTATGAATGTAATCAATGTGGTAAAGCCTTTGCAGGTCACAGTTATCTCCAA:p.Q328_C329insRHKRTHTGEKPYECNQCGKAFAGHSYLQ	12qA1.3
chr12	24215381	24215383	GAC	-	exonic	Gm21297	.	nonframeshift deletion	Gm21297:NM_001384261:exon4:c.890_892del:p.S297_H298delinsN	12qA1.3
chr12	28612863	28612863	-	T	exonic	Colec11	.	frameshift insertion	Colec11:NM_001313978:exon3:c.204dupA:p.G69Rfs*26,Colec11:NM_027866:exon3:c.204dupA:p.G69Rfs*26	12qA2
chr12	55721830	55721830	C	-	exonic	Ralgapa1	.	stopgain	Ralgapa1:NM_001368814:exon18:c.3516delG:p.W1172*	12qC1
chr12	103601493	103601493	-	A	exonic	Ppp4r4	.	frameshift insertion	Ppp4r4:NM_028980:exon19:c.2065dupA:p.N691Kfs*3	12qE
chr12	110629918	110629918	A	-	exonic	Dync1h1	.	frameshift deletion	Dync1h1:NM_030238:exon23:c.4799delA:p.R1601Gfs*64	12qF1
chr12	116255939	116255940	TC	-	exonic	Wdr60	.	frameshift deletion	Wdr60:NM_146039:exon3:c.381_382del:p.K128Rfs*17	12qF2
chr13	5864876	5864876	-	G	exonic	Klf6	.	frameshift insertion	Klf6:NM_011803:exon2:c.314dupG:p.E107Gfs*13	13qA1
chr13	38040188	38040188	-	ATG	exonic	Riok1	.	nonframeshift insertion	Riok1:NM_024242:exon2:c.187_188insATG:p.D68_W69insD	13qA3.3
chr13	66431237	66431237	-	A	exonic	2410141K09Rik	.	stopgain	2410141K09Rik:NM_001290196:exon4:c.1185_1186insT:p.S396*	13qB3
chr13	66431239	66431239	-	T	exonic	2410141K09Rik	.	frameshift insertion	2410141K09Rik:NM_001290196:exon4:c.1183_1184insA:p.L395Hfs*8	13qB3
chr13	66431241	66431242	CC	-	exonic	2410141K09Rik	.	frameshift deletion	2410141K09Rik:NM_001290196:exon4:c.1181_1182del:p.R394Tfs*8	13qB3
chr14	50414188	50414188	T	-	exonic	Olfr738	.	frameshift deletion	Olfr738:NM_146420:exon1:c.643delT:p.F217Lfs*8	14qC1
chr14	50854250	50854250	-	T	exonic	Tep1	.	frameshift insertion	Tep1:NM_009351:exon12:c.1832dupA:p.N611Kfs*2	14qC1
chr15	8350359	8350359	-	T	exonic	Nipbl	.	frameshift insertion	Nipbl:NM_027707:exon10:c.2947dupA:p.M983Nfs*5,Nipbl:NM_201232:exon10:c.2947dupA:p.M983Nfs*5	15qA1
chr15	101859973	101859975	GCC	-	exonic	Krt77	.	nonframeshift deletion	Krt77:NM_001003667:exon9:c.1600_1602del:p.G534del	15qF2
chr16	14269263	14269263	G	-	exonic	Myh11	.	frameshift deletion	Myh11:NM_001161775:exon3:c.348delC:p.Y117Tfs*141,Myh11:NM_013607:exon3:c.348delC:p.Y117Tfs*141	16qA1
chr16	32752550	32752550	-	CA	exonic	Muc4	.	frameshift insertion	Muc4:NM_080457:exon2:c.2427_2428insCA:p.Q810Hfs*30	16qB3
chr16	32752555	32752556	TT	-	exonic	Muc4	.	frameshift deletion	Muc4:NM_080457:exon2:c.2432_2433del:p.L812Vfs*37	16qB3
chr16	32755752	32755752	-	GG	exonic	Muc4	.	frameshift insertion	Muc4:NM_080457:exon4:c.5625_5626insGG:p.I1876Gfs*2	16qB3
chr16	32755754	32755754	T	-	exonic	Muc4	.	frameshift deletion	Muc4:NM_080457:exon4:c.5627delT:p.I1876Kfs*2	16qB3
chr16	32755757	32755757	T	-	exonic	Muc4	.	frameshift deletion	Muc4:NM_080457:exon4:c.5630delT:p.V1877Gfs*14	16qB3
chr16	33966826	33966829	CTGA	-	exonic	Umps	.	frameshift deletion	Umps:NM_009471:exon1:c.153_156del:p.S51Rfs*58	16qB3
chr16	98010822	98010823	AA	-	exonic	B230307C23Rik	.	frameshift deletion	B230307C23Rik:NM_001362093:exon4:c.895_896del:p.K299Afs*3	16qC4
chr17	23345092	23345092	T	-	exonic	Vmn2r115	.	frameshift deletion	Vmn2r115:NM_001104579:exon2:c.237delT:p.S81Pfs*7	17qA3.3
chr17	23359989	23359991	TCT	-	exonic	Vmn2r115	.	nonframeshift deletion	Vmn2r115:NM_001104579:exon6:c.2435_2437del:p.F813del	17qA3.3
chr17	23360127	23360127	A	-	exonic	Vmn2r115	.	stoploss	Vmn2r115:NM_001104579:exon6:c.2573delA:p.*858del	17qA3.3
chr17	23477501	23477501	C	-	exonic	Vmn2r117	.	frameshift deletion	Vmn2r117:NM_001104581:exon3:c.931delG:p.D311Tfs*30	17qA3.3
chr17	23477728	23477728	T	-	exonic	Vmn2r117	.	frameshift deletion	Vmn2r117:NM_001104581:exon3:c.704delA:p.N235Ifs*10	17qA3.3
chr17	23477744	23477745	TT	-	exonic	Vmn2r117	.	frameshift deletion	Vmn2r117:NM_001104581:exon3:c.687_688del:p.E231Dfs*26	17qA3.3
chr17	23479466	23479466	G	-	exonic	Vmn2r117	.	frameshift deletion	Vmn2r117:NM_001104581:exon1:c.132delC:p.F45Sfs*2	17qA3.3
chr17	23479514	23479514	C	-	exonic	Vmn2r117	.	stopgain	Vmn2r117:NM_001104581:exon1:c.84delG:p.I29*	17qA3.3
chr17	24680210	24680210	-	CAT	exonic	Zfp598	.	nonframeshift insertion	Zfp598:NM_001348231:exon9:c.1973_1974insCAT:p.I659_P660insI,Zfp598:NM_183149:exon9:c.1982_1983insCAT:p.I662_P663insI	17qA3.3
chr17	25392246	25392248	TGG	-	exonic	Cacna1h	.	nonframeshift deletion	Cacna1h:NM_001163691:exon9:c.1575_1577del:p.H529del,Cacna1h:NM_021415:exon9:c.1575_1577del:p.H529del	17qA3.3
chr17	30807233	30807233	C	-	exonic	Dnah8	.	frameshift deletion	Dnah8:NM_013811:exon80:c.12108delC:p.K4039Sfs*9	17qA3.3
chr17	35930768	35930782	CATGATGTCCCTAGC	-	exonic	Ppp1r10	.	nonframeshift deletion	Ppp1r10:NM_001163818:exon18:c.2434_2448del:p.D813_H817del,Ppp1r10:NM_001357740:exon18:c.2434_2448del:p.D813_H817del	17qB1
chr18	31887780	31887780	-	A	exonic	Wdr33	.	frameshift insertion	Wdr33:NM_028866:exon15:c.1603dupA:p.T537Nfs*6	18qB1
chr18	37808964	37808964	C	-	exonic	Pcdhgc3	.	frameshift deletion	Pcdhgc3:NM_033581:exon1:c.2417delC:p.P808Lfs*46	18qB3
chr18	58556774	58556774	G	-	exonic	Slc27a6	.	frameshift deletion	Slc27a6:NM_001081072:exon1:c.311delG:p.D106Tfs*6	18qD3
chr1_GL456212_random	139039	139039	-	TAC	exonic	LOC102638047	.	nonframeshift insertion	LOC102638047:NM_001378739:exon5:c.714_715insGTA:p.V238_P239insV,LOC102638047:NM_001378740:exon5:c.714_715insGTA:p.V238_P239insV	.
chr2	11779819	11779829	CTCCGGTACTT	-	exonic	Ankrd16	.	frameshift deletion	Ankrd16:NM_177268:exon2:c.457_467del:p.L153Afs*6	2qA1
chr2	24187190	24187190	-	A	exonic	Il1f9	.	frameshift insertion	Il1f9:NM_153511:exon2:c.14dupA:p.N8Kfs*7	2qA3
chr2	26138500	26138502	CAG	-	exonic	Tmem250-ps	.	nonframeshift deletion	Tmem250-ps:NM_001256521:exon2:c.301_303del:p.L101del,Tmem250-ps:NM_001256522:exon2:c.301_303del:p.L101del	2qA3
chr2	77929460	77929461	TC	-	exonic	Cwc22	.	frameshift deletion	Cwc22:NM_001290740:exon5:c.244_245del:p.D82Cfs*14,Cwc22:NM_001362657:exon5:c.244_245del:p.D82Cfs*14,Cwc22:NM_001362658:exon5:c.241_242del:p.D81Cfs*14,Cwc22:NM_001362664:exon5:c.241_242del:p.D81Cfs*14,Cwc22:NM_172667:exon5:c.241_242del:p.D81Cfs*14,Cwc22:NM_001362659:exon6:c.241_242del:p.D81Cfs*14,Cwc22:NM_030560:exon6:c.241_242del:p.D81Cfs*14	2qC3
chr2	84950006	84950008	AGC	-	exonic	Slc43a3	.	nonframeshift deletion	Slc43a3:NM_021398:exon9:c.803_805del:p.Q277del	2qD
chr2	89144124	89144124	T	-	exonic	Olfr1223	.	frameshift deletion	Olfr1223:NM_146892:exon2:c.898delA:p.I300Yfs*12	2qE1
chr2	160779756	160779758	GAA	-	exonic	Zhx3	.	nonframeshift deletion	Zhx3:NM_177263:exon3:c.2488_2490del:p.F830del	2qH2
chr2	164953268	164953268	T	-	exonic	Mmp9	.	frameshift deletion	Mmp9:NM_013599:exon11:c.1809delT:p.Q604Kfs*21	2qH3
chr2	174426495	174426495	T	-	exonic	Nelfcd	.	stopgain	Nelfcd:NM_020580:exon13:c.1477delT:p.L493*	2qH4
chr3	92572302	92572307	TGCTGC	-	exonic	Ivl	.	nonframeshift deletion	Ivl:NM_008412:exon2:c.450_455del:p.Q151_Q152del	3qF1
chr4	63171423	63171423	-	GGGCCTCCACCCGGC	exonic	Kif12	.	nonframeshift insertion	Kif12:NM_001317352:exon4:c.179_180insGCCGGGTGGAGGCCC:p.P60_D61insPGGGP,Kif12:NM_010616:exon4:c.179_180insGCCGGGTGGAGGCCC:p.P60_D61insPGGGP	4qB3
chr4	123240182	123240184	GAA	-	exonic	Heyl	.	nonframeshift deletion	Heyl:NM_013905:exon2:c.132_134del:p.K46del	4qD2.2
chr4	126165423	126165427	CTTCT	-	exonic	Thrap3	.	frameshift deletion	Thrap3:NM_146153:exon11:c.2825_2829del:p.E942Gfs*8,Thrap3:NM_001356455:exon12:c.2825_2829del:p.E942Gfs*8,Thrap3:NM_001356456:exon12:c.2825_2829del:p.E942Gfs*8	4qD2.2
chr4	126165497	126165497	C	-	exonic	Thrap3	.	frameshift deletion	Thrap3:NM_146153:exon11:c.2755delG:p.A919Pfs*12,Thrap3:NM_001356455:exon12:c.2755delG:p.A919Pfs*12,Thrap3:NM_001356456:exon12:c.2755delG:p.A919Pfs*12	4qD2.2
chr4	144273087	144273087	C	-	exonic	Pramel5	.	frameshift deletion	Pramel5:NM_001085418:exon3:c.429delG:p.K144Nfs*4	4qE1
chr4	147391306	147391307	AA	-	exonic	Zfp978	.	frameshift deletion	Zfp978:NM_001378742:exon5:c.1309_1310del:p.K437Rfs*8	4qE1
chr4	147584193	147584194	TT	-	exonic	Zfp985	.	frameshift deletion	Zfp985:NM_001014397:exon6:c.1517_1518del:p.I506Kfs*18	4qE1
chr4	147584198	147584198	C	-	exonic	Zfp985	.	frameshift deletion	Zfp985:NM_001014397:exon6:c.1522delC:p.H508Ifs*26	4qE1
chr4	147674646	147674729	CATTTGTAAGGTTTCTCTCCTGTATGAATTCTCTGATGAATTCTCAGACTGCTTTTTTCAGTAAAGCATTTGCCACATTCACTA	-	exonic	Zfp534	.	nonframeshift deletion	Zfp534:NM_001127188:exon4:c.1482_1565del:p.G498_C525del	4qE1
chr4	147754930	147755013	TTCTCTCCTGTATGAATTCTCTGATGAATATTAAGATTGGATTTTTGGGTAAAGCATTTGTCACATTCACTGCATTTGTAAGGG	-	exonic	Zfp984	.	nonframeshift deletion	Zfp984:NM_001127189:exon6:c.1380_1463del:p.N460_E487del	4qE1
chr4	149647409	149647411	GAG	-	exonic	Clstn1	.	nonframeshift deletion	Clstn1:NM_001290989:exon18:c.2755_2757del:p.E925del,Clstn1:NM_023051:exon19:c.2785_2787del:p.E935del	4qE2
chr4	154036307	154036309	TCC	-	exonic	Ccdc27	.	nonframeshift deletion	Ccdc27:NM_001033455:exon7:c.1029_1031del:p.E347del	4qE2
chr4_GL456216_random	34238	34238	C	-	exonic	Dhrsx	.	frameshift deletion	Dhrsx:NM_001368261:exon4:c.387delC:p.A131Pfs*69,Dhrsx:NM_001368262:exon4:c.381delC:p.A129Pfs*69,Dhrsx:NM_001033326:exon5:c.489delC:p.A165Pfs*69	.
chr4_JH584292_random	3782	3783	TG	-	exonic	Vmn2r122	.	frameshift deletion	Vmn2r122:NM_001385246:exon1:c.162_163del:p.D54Efs*4,Vmn2r122:NM_001385247:exon1:c.162_163del:p.D54Efs*4,Vmn2r122:NM_001385250:exon1:c.162_163del:p.D54Efs*4,Vmn2r122:NM_001385252:exon1:c.162_163del:p.D54Efs*4,Vmn2r122:NM_009488:exon1:c.162_163del:p.D54Efs*4,Vmn2r122:NM_009492:exon1:c.162_163del:p.D54Efs*4	.
chr4_JH584292_random	3785	3785	-	AAT	exonic	Vmn2r122	.	nonframeshift insertion	Vmn2r122:NM_001385246:exon1:c.165_166insAAT:p.E55_P56insN,Vmn2r122:NM_001385247:exon1:c.165_166insAAT:p.E55_P56insN,Vmn2r122:NM_001385250:exon1:c.165_166insAAT:p.E55_P56insN,Vmn2r122:NM_001385252:exon1:c.165_166insAAT:p.E55_P56insN,Vmn2r122:NM_009488:exon1:c.165_166insAAT:p.E55_P56insN,Vmn2r122:NM_009492:exon1:c.165_166insAAT:p.E55_P56insN	.
chr4_JH584292_random	3790	3790	-	AC	exonic	Vmn2r122	.	frameshift insertion	Vmn2r122:NM_001385246:exon1:c.170_171insAC:p.E58Lfs*10,Vmn2r122:NM_001385247:exon1:c.170_171insAC:p.E58Lfs*10,Vmn2r122:NM_001385250:exon1:c.170_171insAC:p.E58Lfs*10,Vmn2r122:NM_001385252:exon1:c.170_171insAC:p.E58Lfs*10,Vmn2r122:NM_009488:exon1:c.170_171insAC:p.E58Lfs*10,Vmn2r122:NM_009492:exon1:c.170_171insAC:p.E58Lfs*10	.
chr4_JH584292_random	3792	3792	G	-	exonic	Vmn2r122	.	frameshift deletion	Vmn2r122:NM_001385246:exon1:c.172delG:p.E58Kfs*9,Vmn2r122:NM_001385247:exon1:c.172delG:p.E58Kfs*9,Vmn2r122:NM_001385250:exon1:c.172delG:p.E58Kfs*9,Vmn2r122:NM_001385252:exon1:c.172delG:p.E58Kfs*9,Vmn2r122:NM_009488:exon1:c.172delG:p.E58Kfs*9,Vmn2r122:NM_009492:exon1:c.172delG:p.E58Kfs*9	.
chr4_JH584292_random	3794	3795	AG	-	exonic	Vmn2r122	.	stopgain	Vmn2r122:NM_001385246:exon1:c.174_175del:p.D59*,Vmn2r122:NM_001385247:exon1:c.174_175del:p.D59*,Vmn2r122:NM_001385250:exon1:c.174_175del:p.D59*,Vmn2r122:NM_001385252:exon1:c.174_175del:p.D59*,Vmn2r122:NM_009488:exon1:c.174_175del:p.D59*,Vmn2r122:NM_009492:exon1:c.174_175del:p.D59*	.
chr4_JH584292_random	3800	3800	-	AA	exonic	Vmn2r122	.	frameshift insertion	Vmn2r122:NM_001385246:exon1:c.180_181insAA:p.F61Nfs*7,Vmn2r122:NM_001385247:exon1:c.180_181insAA:p.F61Nfs*7,Vmn2r122:NM_001385250:exon1:c.180_181insAA:p.F61Nfs*7,Vmn2r122:NM_001385252:exon1:c.180_181insAA:p.F61Nfs*7,Vmn2r122:NM_009488:exon1:c.180_181insAA:p.F61Nfs*7,Vmn2r122:NM_009492:exon1:c.180_181insAA:p.F61Nfs*7	.
chr4_JH584292_random	3808	3808	-	AT	exonic	Vmn2r122	.	frameshift insertion	Vmn2r122:NM_001385246:exon1:c.188_189insAT:p.N63Kfs*5,Vmn2r122:NM_001385247:exon1:c.188_189insAT:p.N63Kfs*5,Vmn2r122:NM_001385250:exon1:c.188_189insAT:p.N63Kfs*5,Vmn2r122:NM_001385252:exon1:c.188_189insAT:p.N63Kfs*5,Vmn2r122:NM_009488:exon1:c.188_189insAT:p.N63Kfs*5,Vmn2r122:NM_009492:exon1:c.188_189insAT:p.N63Kfs*5	.
chr4_JH584292_random	3812	3812	T	-	exonic	Vmn2r122	.	stopgain	Vmn2r122:NM_001385246:exon1:c.192delT:p.Y64*,Vmn2r122:NM_001385247:exon1:c.192delT:p.Y64*,Vmn2r122:NM_001385250:exon1:c.192delT:p.Y64*,Vmn2r122:NM_001385252:exon1:c.192delT:p.Y64*,Vmn2r122:NM_009488:exon1:c.192delT:p.Y64*,Vmn2r122:NM_009492:exon1:c.192delT:p.Y64*	.
chr4_JH584292_random	11356	11356	G	-	exonic	Vmn2r122	.	frameshift deletion	Vmn2r122:NM_009488:exon5:c.2184delG:p.G729Vfs*46,Vmn2r122:NM_009492:exon5:c.2289delG:p.G764Vfs*46,Vmn2r122:NM_001385246:exon6:c.2412delG:p.G805Vfs*46,Vmn2r122:NM_001385247:exon6:c.2409delG:p.G804Vfs*46	.
chr5	25950853	25950855	CTT	-	exonic	Gm21671	.	nonframeshift deletion	Gm21671:NM_001281516:exon4:c.490_492del:p.K164del	5qB1
chr5	26001227	26001229	CTT	-	exonic	Gm1979	.	nonframeshift deletion	Gm1979:NM_001281519:exon4:c.490_492del:p.K164del	5qB1
chr5	26085725	26085727	CTT	-	exonic	Gm10471	.	nonframeshift deletion	Gm10471:NM_001177579:exon4:c.445_447del:p.K149del	5qB1
chr5	75974466	75974466	-	G	exonic	Kdr	.	frameshift insertion	Kdr:NM_001363216:exon2:c.96dupC:p.K33Qfs*37,Kdr:NM_010612:exon2:c.96dupC:p.K33Qfs*37	5qC3.3
chr5	109363914	109363914	A	-	exonic	Vmn2r16	.	frameshift deletion	Vmn2r16:NM_001104627:exon6:c.1986delA:p.A663Pfs*10,Vmn2r16:NM_001385189:exon6:c.1983delA:p.A662Pfs*10	5qF
chr5	121206732	121206732	C	-	exonic	Rpl6	.	frameshift deletion	Rpl6:NM_011290:exon4:c.426delC:p.Q143Sfs*3	5qF
chr5	124624334	124624334	-	AC	exonic	Tctn2	.	unknown	UNKNOWN	5qF
chr5	137152812	137152812	-	CG	exonic	Muc3	.	frameshift insertion	Muc3:NM_010843:exon3:c.588_589insCG:p.T197Rfs*11	5qG2
chr6	4756452	4756452	-	CACATCAGGATCCCCATCAGGATCCCCATCAGGATGCACATCAGGATCCACATCAGCATCCGGATCCCCATCAGGATCCTC	exonic	Peg10	.	unknown	UNKNOWN	6qA1
chr6	23410016	23410016	A	-	exonic	Cadps2	.	frameshift deletion	Cadps2:NM_001252107:exon14:c.2216delT:p.F739Sfs*7	6qA3.1
chr6	82091937	82091937	-	GCAGCGACA	exonic	Eva1a	.	nonframeshift insertion	Eva1a:NM_145570:exon3:c.244_245insGCAGCGACA:p.S88_E89insSDS	6qC3
chr6	116042985	116042985	-	TTTT	exonic	Tmcc1	.	frameshift insertion	Tmcc1:NM_001364577:exon2:c.424_425insAAAA:p.V142Efs*40,Tmcc1:NM_177412:exon4:c.1384_1385insAAAA:p.V462Efs*40	6qE3
chr6	116042987	116042987	-	GTGATTT	exonic	Tmcc1	.	frameshift insertion	Tmcc1:NM_001364577:exon2:c.422_423insAAATCAC:p.V142Nfs*41,Tmcc1:NM_177412:exon4:c.1382_1383insAAATCAC:p.V462Nfs*41	6qE3
chr6	116042990	116042990	-	GTTTTCTTACCATATTCCACGTCCTTCAG	exonic	Tmcc1	.	stopgain	Tmcc1:NM_001364577:exon2:c.419_420insCTGAAGGACGTGGAATATGGTAAGAAAAC:p.E141*,Tmcc1:NM_177412:exon4:c.1379_1380insCTGAAGGACGTGGAATATGGTAAGAAAAC:p.E461*	6qE3
chr6	116042992	116042992	-	GACATTTCAAAATTTTCCACCTTTTT	exonic	Tmcc1	.	frameshift insertion	Tmcc1:NM_001364577:exon2:c.417_418insAAAAAGGTGGAAAATTTTGAAATGTC:p.H140Kfs*39,Tmcc1:NM_177412:exon4:c.1377_1378insAAAAAGGTGGAAAATTTTGAAATGTC:p.H460Kfs*39	6qE3
chr7	4509094	4509096	CCT	-	exonic	Tnnt1	.	nonframeshift deletion	Tnnt1:NM_001277904:exon9:c.380_382del:p.E127del,Tnnt1:NM_001360154:exon9:c.383_385del:p.E128del,Tnnt1:NM_001277903:exon10:c.416_418del:p.E139del,Tnnt1:NM_011618:exon10:c.413_415del:p.E138del	7qA1
chr7	10040352	10040352	-	A	exonic	Vmn2r50	.	frameshift insertion	Vmn2r50:NM_001105178:exon5:c.1615dupT:p.C539Lfs*6	7qA1
chr7	10715488	10715488	A	-	exonic	Nlrp4b	.	stopgain	Nlrp4b:NM_001355151:exon4:c.1617delA:p.I542*,Nlrp4b:NM_172481:exon4:c.1617delA:p.I542*	7qA1
chr7	62419950	62419950	G	-	exonic	Mkrn3	.	frameshift deletion	Mkrn3:NM_011746:exon1:c.92delC:p.P31Lfs*29	7qC
chr7	79707571	79707573	TCC	-	exonic	Kif7	.	nonframeshift deletion	Kif7:NM_010626:exon7:c.1884_1886del:p.E636del,Kif7:NM_001291222:exon8:c.1884_1886del:p.E636del	7qD2
chr7	87429127	87429129	CTT	-	exonic	Tyr	.	nonframeshift deletion	Tyr:NM_011661:exon5:c.1522_1524del:p.K508del	7qD3
chr7	127024475	127024479	GCCCT	-	exonic	Maz	.	frameshift deletion	Maz:NM_001372522:exon4:c.1244_1248del:p.Q415Pfs*6,Maz:NM_001372523:exon4:c.1244_1248del:p.Q415Pfs*6,Maz:NM_010772:exon4:c.1244_1248del:p.Q415Pfs*6,Maz:NM_001372521:exon5:c.1175_1179del:p.Q392Pfs*6	7qF3
chr7	131984095	131984095	C	-	exonic	Gpr26	.	frameshift deletion	Gpr26:NM_173410:exon3:c.793delC:p.L265Sfs*45	7qF3
chr7	132597750	132597752	TCC	-	exonic	Nkx1-2	.	nonframeshift deletion	Nkx1-2:NM_009123:exon2:c.279_281del:p.E94del	7qF3
chr7	141638851	141638856	GTGTGG	-	exonic	Muc6	.	nonframeshift deletion	Muc6:NM_001368953:exon31:c.5588_5593del:p.P1863_T1864del	7qF5
chr7	141638859	141639059	GTCACTGTGGAAGGTTGCGAGAGATGGGGTGCAGAGGTCCTGTCTGTGGAGAACGAGCTTTTGGTTTGTGTGGCAGCAGTGGTTGTATACGTGACAGGTACTGATGTATGAGGTGGTCTTGTGCCTTCCAGGGTGGTTGGAAGGACAGTCATCAGTGGCATGGAGGTAGAGGCCACTGATAGGGAGTGTGGGCTGGTTGGG	-	exonic	Muc6	.	nonframeshift deletion	Muc6:NM_001368953:exon31:c.5385_5585del:p.S1798_T1864del	7qF5
chr8	11423816	11423816	-	C	exonic	Col4a2	.	frameshift insertion	Col4a2:NM_009932:exon24:c.1755dupC:p.D589Rfs*69	8qA1.1
chr8	19126354	19126354	T	-	exonic	Defb34	.	frameshift deletion	Defb34:NM_183035:exon2:c.60delT:p.F24Lfs*17	8qA1.3
chr8	25641003	25641005	CTT	-	exonic	Nsd3	.	nonframeshift deletion	Nsd3:NM_001081269:exon1:c.383_385del:p.S129del,Nsd3:NM_001001735:exon2:c.383_385del:p.S129del,Nsd3:NM_001308481:exon2:c.383_385del:p.S129del,Nsd3:NM_001308482:exon2:c.383_385del:p.S129del	8qA2
chr8	26160824	26160824	A	-	exonic	Thap1	.	frameshift deletion	Thap1:NM_199042:exon2:c.121delA:p.R42Gfs*31	8qA2
chr8	26160857	26160858	AG	-	exonic	Thap1	.	frameshift deletion	Thap1:NM_199042:exon2:c.154_155del:p.S52Hfs*12	8qA2
chr8	26160860	26160870	ATCTGCTCGGA	-	exonic	Thap1	.	frameshift deletion	Thap1:NM_199042:exon2:c.157_167del:p.I53Afs*8	8qA2
chr8	26160969	26160969	-	GAAGGAAGACCTGGAATCCCAAGAACAGCTTCCCTCTGCTTCACCCCCCTGCTTCCCAGGTTGAT	exonic	Thap1	.	stopgain	Thap1:NM_199042:exon2:c.266_267insGAAGGAAGACCTGGAATCCCAAGAACAGCTTCCCTCTGCTTCACCCCCCTGCTTCCCAGGTTGAT:p.P102Afs*9	8qA2
chr8	26162481	26162481	-	T	exonic	Thap1	.	frameshift insertion	Thap1:NM_199042:exon3:c.315_316insT:p.A106Cfs*5	8qA2
chr8	26162604	26162604	C	-	exonic	Thap1	.	frameshift deletion	Thap1:NM_199042:exon3:c.438delC:p.L147Cfs*50	8qA2
chr8	26162687	26162687	-	TGAAAAGCTCAAGACTGCCCAGCAG	exonic	Thap1	.	frameshift insertion	Thap1:NM_199042:exon3:c.521_522insTGAAAAGCTCAAGACTGCCCAGCAG:p.E179Tfs*31	8qA2
chr8	26162689	26162689	-	GTGCCGGC	exonic	Thap1	.	frameshift insertion	Thap1:NM_199042:exon3:c.523_524insGTGCCGGC:p.E175Gfs*25	8qA2
chr8	26162691	26162691	-	CAGGAGAGGCAGCTTGAA	exonic	Thap1	.	nonframeshift insertion	Thap1:NM_199042:exon3:c.525_526insCAGGAGAGGCAGCTTGAA:p.E175_K176insQERQLE	8qA2
chr8	69611911	69611912	TA	-	exonic	Zfp868	.	frameshift deletion	Zfp868:NM_001045553:exon5:c.771_772del:p.H257Qfs*10,Zfp868:NM_172754:exon5:c.771_772del:p.H257Qfs*10	8qB3.3
chr8	104182034	104182034	C	-	exonic	Bean1	.	frameshift deletion	Bean1:NM_001141922:exon3:c.42delC:p.Q15Kfs*29	8qD3
chr8	108956155	108956157	CAG	-	exonic	Zfhx3	.	nonframeshift deletion	Zfhx3:NM_007496:exon10:c.10225_10227del:p.Q3417del	8qD3
chr8	110592792	110592792	G	-	exonic	Hydin	.	frameshift deletion	Hydin:NM_172916:exon78:c.13326delG:p.G4443Afs*4	8qD3
chr8	125671932	125671932	G	-	exonic	Map10	.	frameshift deletion	Map10:NM_028908:exon1:c.2063delG:p.D689Mfs*31	8qE2
chr9	7144177	7144177	-	T	exonic	Dync2h1	.	frameshift insertion	Dync2h1:NM_029851:exon22:c.3262dupA:p.I1088Nfs*2	9qA1
chr9	36582635	36582635	T	-	exonic	Pate8	.	startloss	Pate8:NM_001167584:exon1:c.1delA:p.M1?	9qA4
chr9	65280131	65280131	G	-	exonic	Cilp	.	frameshift deletion	Cilp:NM_173385:exon10:c.3507delG:p.G1170Afs*16,Cilp:NM_001364527:exon11:c.3210delG:p.G1071Afs*16	9qC
chr9	103355190	103355190	C	-	exonic	Cdv3	.	frameshift deletion	Cdv3:NM_175833:exon5:c.819delG:p.K274Sfs*19	9qF1
chr9	103355192	103355192	G	-	exonic	Cdv3	.	frameshift deletion	Cdv3:NM_175833:exon5:c.817delC:p.Q273Rfs*20	9qF1
chr9	103355194	103355204	TTCTCAAGCAC	-	exonic	Cdv3	.	frameshift deletion	Cdv3:NM_175833:exon5:c.805_815del:p.V269Sfs*16	9qF1

## Sheet: snps_protein_coding_region
Chr	Start	End	Ref	Alt	Func.refGene	Gene.refGene	GeneDetail.refGene	ExonicFunc.refGene	AAChange.refGene	cytoBand
chr1	5098048	5098048	A	C	exonic	Atp6v1h	.	nonsynonymous SNV	Atp6v1h:NM_001310442:exon6:c.A440C:p.K147T,Atp6v1h:NM_133826:exon6:c.A440C:p.K147T	1qA1
chr1	7163330	7163330	C	T	exonic	Pcmtd1	.	nonsynonymous SNV	Pcmtd1:NM_183028:exon5:c.C665T:p.P222L	1qA1
chr1	9545577	9545577	G	A	exonic	Rrs1	.	synonymous SNV	Rrs1:NM_021511:exon1:c.G54A:p.A18A	1qA2
chr1	9545597	9545597	C	T	exonic	Rrs1	.	nonsynonymous SNV	Rrs1:NM_021511:exon1:c.C74T:p.T25M	1qA2
chr1	9545621	9545621	A	T	exonic	Rrs1	.	nonsynonymous SNV	Rrs1:NM_021511:exon1:c.A98T:p.E33V	1qA2
chr1	9545654	9545654	G	A	exonic	Rrs1	.	nonsynonymous SNV	Rrs1:NM_021511:exon1:c.G131A:p.R44H	1qA2
chr1	9545663	9545663	C	T	exonic	Rrs1	.	nonsynonymous SNV	Rrs1:NM_021511:exon1:c.C140T:p.P47L	1qA2
chr1	9545666	9545666	C	T	exonic	Rrs1	.	nonsynonymous SNV	Rrs1:NM_021511:exon1:c.C143T:p.T48I	1qA2
chr1	9545668	9545668	G	A	exonic	Rrs1	.	nonsynonymous SNV	Rrs1:NM_021511:exon1:c.G145A:p.V49M	1qA2
chr1	9545674	9545674	C	T	exonic	Rrs1	.	nonsynonymous SNV	Rrs1:NM_021511:exon1:c.C151T:p.R51C	1qA2
chr1	9545682	9545682	C	T	exonic	Rrs1	.	synonymous SNV	Rrs1:NM_021511:exon1:c.C159T:p.A53A	1qA2
chr1	9545684	9545684	G	T	exonic	Rrs1	.	nonsynonymous SNV	Rrs1:NM_021511:exon1:c.G161T:p.G54V	1qA2
chr1	9545685	9545685	G	T	exonic	Rrs1	.	synonymous SNV	Rrs1:NM_021511:exon1:c.G162T:p.G54G	1qA2
chr1	9545688	9545688	G	T	exonic	Rrs1	.	synonymous SNV	Rrs1:NM_021511:exon1:c.G165T:p.P55P	1qA2
chr1	9545691	9545691	G	A	exonic	Rrs1	.	synonymous SNV	Rrs1:NM_021511:exon1:c.G168A:p.S56S	1qA2
chr1	9545693	9545693	C	T	exonic	Rrs1	.	nonsynonymous SNV	Rrs1:NM_021511:exon1:c.C170T:p.P57L	1qA2
chr1	9545700	9545700	C	G	exonic	Rrs1	.	synonymous SNV	Rrs1:NM_021511:exon1:c.C177G:p.A59A	1qA2
chr1	9545762	9545762	C	A	exonic	Rrs1	.	nonsynonymous SNV	Rrs1:NM_021511:exon1:c.C239A:p.P80Q	1qA2
chr1	9545767	9545767	G	A	exonic	Rrs1	.	nonsynonymous SNV	Rrs1:NM_021511:exon1:c.G244A:p.E82K	1qA2
chr1	9545801	9545801	C	A	exonic	Rrs1	.	nonsynonymous SNV	Rrs1:NM_021511:exon1:c.C278A:p.P93Q	1qA2
chr1	9545808	9545808	C	G	exonic	Rrs1	.	synonymous SNV	Rrs1:NM_021511:exon1:c.C285G:p.P95P	1qA2
chr1	9545840	9545840	C	A	exonic	Rrs1	.	nonsynonymous SNV	Rrs1:NM_021511:exon1:c.C317A:p.P106H	1qA2
chr1	9545848	9545848	C	A	exonic	Rrs1	.	synonymous SNV	Rrs1:NM_021511:exon1:c.C325A:p.R109R	1qA2
chr1	9545860	9545860	C	A	exonic	Rrs1	.	nonsynonymous SNV	Rrs1:NM_021511:exon1:c.C337A:p.R113S	1qA2
chr1	9545875	9545875	G	C	exonic	Rrs1	.	nonsynonymous SNV	Rrs1:NM_021511:exon1:c.G352C:p.A118P	1qA2
chr1	9545876	9545876	C	T	exonic	Rrs1	.	nonsynonymous SNV	Rrs1:NM_021511:exon1:c.C353T:p.A118V	1qA2
chr1	9545894	9545894	G	T	exonic	Rrs1	.	nonsynonymous SNV	Rrs1:NM_021511:exon1:c.G371T:p.R124L	1qA2
chr1	9545925	9545925	C	A	exonic	Rrs1	.	nonsynonymous SNV	Rrs1:NM_021511:exon1:c.C402A:p.D134E	1qA2
chr1	9545944	9545944	C	A	exonic	Rrs1	.	synonymous SNV	Rrs1:NM_021511:exon1:c.C421A:p.R141R	1qA2
chr1	9545951	9545951	G	T	exonic	Rrs1	.	nonsynonymous SNV	Rrs1:NM_021511:exon1:c.G428T:p.R143L	1qA2
chr1	9545985	9545985	A	G	exonic	Rrs1	.	synonymous SNV	Rrs1:NM_021511:exon1:c.A462G:p.K154K	1qA2
chr1	9545992	9545992	C	G	exonic	Rrs1	.	nonsynonymous SNV	Rrs1:NM_021511:exon1:c.C469G:p.L157V	1qA2
chr1	9546138	9546138	C	A	exonic	Rrs1	.	synonymous SNV	Rrs1:NM_021511:exon1:c.C615A:p.A205A	1qA2
chr1	9546150	9546150	T	C	exonic	Rrs1	.	synonymous SNV	Rrs1:NM_021511:exon1:c.T627C:p.P209P	1qA2
chr1	9546153	9546153	T	G	exonic	Rrs1	.	synonymous SNV	Rrs1:NM_021511:exon1:c.T630G:p.T210T	1qA2
chr1	9546171	9546171	A	G	exonic	Rrs1	.	synonymous SNV	Rrs1:NM_021511:exon1:c.A648G:p.E216E	1qA2
chr1	9546180	9546180	C	T	exonic	Rrs1	.	synonymous SNV	Rrs1:NM_021511:exon1:c.C657T:p.G219G	1qA2
chr1	9546215	9546215	C	T	exonic	Rrs1	.	nonsynonymous SNV	Rrs1:NM_021511:exon1:c.C692T:p.S231L	1qA2
chr1	9546223	9546223	C	T	exonic	Rrs1	.	nonsynonymous SNV	Rrs1:NM_021511:exon1:c.C700T:p.R234C	1qA2
chr1	9546259	9546259	C	T	exonic	Rrs1	.	nonsynonymous SNV	Rrs1:NM_021511:exon1:c.C736T:p.R246W	1qA2
chr1	9546268	9546268	G	T	exonic	Rrs1	.	nonsynonymous SNV	Rrs1:NM_021511:exon1:c.G745T:p.G249C	1qA2
chr1	9546313	9546313	G	A	exonic	Rrs1	.	nonsynonymous SNV	Rrs1:NM_021511:exon1:c.G790A:p.E264K	1qA2
chr1	9546338	9546338	T	A	exonic	Rrs1	.	nonsynonymous SNV	Rrs1:NM_021511:exon1:c.T815A:p.L272H	1qA2
chr1	9546341	9546341	G	T	exonic	Rrs1	.	nonsynonymous SNV	Rrs1:NM_021511:exon1:c.G818T:p.R273L	1qA2
chr1	9546372	9546372	C	T	exonic	Rrs1	.	synonymous SNV	Rrs1:NM_021511:exon1:c.C849T:p.D283D	1qA2
chr1	9546377	9546377	C	T	exonic	Rrs1	.	nonsynonymous SNV	Rrs1:NM_021511:exon1:c.C854T:p.T285M	1qA2
chr1	9546414	9546414	G	A	exonic	Rrs1	.	synonymous SNV	Rrs1:NM_021511:exon1:c.G891A:p.Q297Q	1qA2
chr1	9546452	9546452	G	A	exonic	Rrs1	.	nonsynonymous SNV	Rrs1:NM_021511:exon1:c.G929A:p.G310D	1qA2
chr1	9546478	9546478	C	T	exonic	Rrs1	.	nonsynonymous SNV	Rrs1:NM_021511:exon1:c.C955T:p.P319S	1qA2
chr1	9546504	9546504	G	C	exonic	Rrs1	.	synonymous SNV	Rrs1:NM_021511:exon1:c.G981C:p.P327P	1qA2
chr1	9546533	9546533	G	A	exonic	Rrs1	.	nonsynonymous SNV	Rrs1:NM_021511:exon1:c.G1010A:p.G337D	1qA2
chr1	9546572	9546572	C	G	exonic	Rrs1	.	nonsynonymous SNV	Rrs1:NM_021511:exon1:c.C1049G:p.A350G	1qA2
chr1	9546588	9546588	A	T	exonic	Rrs1	.	synonymous SNV	Rrs1:NM_021511:exon1:c.A1065T:p.G355G	1qA2
chr1	10083546	10083546	C	G	exonic	Cspp1	.	nonsynonymous SNV	Cspp1:NM_001368816:exon11:c.C1167G:p.D389E,Cspp1:NM_026493:exon11:c.C1179G:p.D393E	1qA2
chr1	11181959	11181959	G	A	exonic	Prex2	.	nonsynonymous SNV	Prex2:NM_029525:exon26:c.G3227A:p.R1076H	1qA2
chr1	15710091	15710091	A	C	exonic	Kcnb2	.	nonsynonymous SNV	Kcnb2:NM_001098528:exon3:c.A1186C:p.I396L	1qA3
chr1	15711028	15711028	C	T	exonic	Kcnb2	.	nonsynonymous SNV	Kcnb2:NM_001098528:exon3:c.C2123T:p.S708L	1qA3
chr1	17091441	17091441	T	A	exonic	Jph1	.	nonsynonymous SNV	Jph1:NM_020604:exon2:c.A996T:p.K332N	1qA3
chr1	22288586	22288586	C	G	exonic	Rims1	.	unknown	UNKNOWN	1qA5
chr1	24279940	24279940	A	C	exonic	Col19a1	.	nonsynonymous SNV	Col19a1:NM_007733:exon48:c.T3068G:p.I1023S	1qA5
chr1	25131271	25131271	C	T	exonic	Adgrb3	.	nonsynonymous SNV	Adgrb3:NM_175642:exon20:c.G2945A:p.R982H	1qA5
chr1	26687400	26687400	A	T	exonic	4931408C20Rik	.	nonsynonymous SNV	4931408C20Rik:NM_001033764:exon1:c.T27A:p.N9K	1qA5
chr1	30824358	30824358	A	G	exonic	Phf3	.	nonsynonymous SNV	Phf3:NM_001081080:exon4:c.T2285C:p.I762T	1qA5
chr1	36174191	36174191	A	C	exonic	Uggt1	.	nonsynonymous SNV	Uggt1:NM_198899:exon24:c.T2582G:p.F861C	1qB
chr1	36385164	36385164	C	T	exonic	Fer1l5	.	synonymous SNV	Fer1l5:NM_001277076:exon11:c.C858T:p.V286V	1qB
chr1	36401422	36401422	G	A	exonic	Fer1l5	.	nonsynonymous SNV	Fer1l5:NM_001277076:exon20:c.G1735A:p.D579N	1qB
chr1	39682966	39682966	T	G	exonic	Rfx8	.	nonsynonymous SNV	Rfx8:NM_001145660:exon10:c.A858C:p.E286D	1qB
chr1	40022760	40022760	G	C	exonic	Map4k4	.	nonsynonymous SNV	Map4k4:NM_001252202:exon27:c.G3149C:p.G1050A,Map4k4:NM_001252201:exon28:c.G3188C:p.G1063A,Map4k4:NM_008696:exon28:c.G3227C:p.G1076A,Map4k4:NM_001252200:exon29:c.G3389C:p.G1130A	1qB
chr1	40474751	40474751	A	C	exonic	Il18r1	.	nonsynonymous SNV	Il18r1:NM_008365:exon3:c.A116C:p.K39T,Il18r1:NM_001161842:exon4:c.A116C:p.K39T,Il18r1:NM_001161843:exon4:c.A116C:p.K39T	1qB
chr1	46195339	46195339	G	A	exonic	Dnah7b	.	nonsynonymous SNV	Dnah7b:NM_001368717:exon27:c.G4298A:p.G1433E	1qC1.1
chr1	46455793	46455793	A	C	exonic	Dnah7c	.	synonymous SNV	Dnah7c:NM_001310335:exon4:c.A180C:p.S60S	1qC1.1
chr1	52123120	52123120	C	T	exonic	Stat1	.	synonymous SNV	Stat1:NM_001205313:exon4:c.C135T:p.H45H,Stat1:NM_001205314:exon4:c.C135T:p.H45H,Stat1:NM_001357627:exon4:c.C135T:p.H45H,Stat1:NM_009283:exon4:c.C135T:p.H45H	1qC1.1
chr1	53468643	53468643	A	C	exonic	Dnah7a	.	nonsynonymous SNV	Dnah7a:NM_001252070:exon50:c.T9268G:p.Y3090D	1qC1.1
chr1	53832634	53832634	T	G	exonic	Hecw2	.	nonsynonymous SNV	Hecw2:NM_001001883:exon24:c.A4152C:p.E1384D	1qC1.1
chr1	54658982	54658982	A	C	exonic	Ankrd44	.	nonsynonymous SNV	Ankrd44:NM_001081433:exon22:c.T2372G:p.L791R	1qC1.2
chr1	56636234	56636234	C	T	exonic	Hsfy2	.	synonymous SNV	Hsfy2:NM_027661:exon1:c.G1143A:p.T381T	1qC1.3
chr1	58081542	58081542	G	A	exonic	Aox1	.	nonsynonymous SNV	Aox1:NM_009676:exon24:c.G2593A:p.V865M	1qC1.3
chr1	58350268	58350268	T	C	exonic	Aox2	.	nonsynonymous SNV	Aox2:NM_001008419:exon30:c.T3425C:p.L1142P	1qC1.3
chr1	58397793	58397793	T	C	exonic	Bzw1	.	nonsynonymous SNV	Bzw1:NM_025824:exon3:c.T182C:p.L61P	1qC1.3
chr1	58476516	58476516	A	C	exonic	Orc2	.	nonsynonymous SNV	Orc2:NM_001025378:exon8:c.T688G:p.F230V,Orc2:NM_001271526:exon11:c.T832G:p.F278V,Orc2:NM_008765:exon11:c.T832G:p.F278V	1qC1.3
chr1	59005778	59005778	G	A	exonic	C2cd6	.	synonymous SNV	C2cd6:NM_026600:exon18:c.C3873T:p.V1291V	1qC1.3
chr1	59120326	59120326	C	T	exonic	Tmem237	.	nonsynonymous SNV	Tmem237:NM_001361413:exon1:c.G34A:p.D12N	1qC1.3
chr1	59483870	59483870	G	C	exonic	Fzd7	.	nonsynonymous SNV	Fzd7:NM_008057:exon1:c.G911C:p.G304A	1qC2
chr1	60254908	60254908	G	A	exonic	Nbeal1	.	synonymous SNV	Nbeal1:NM_173444:exon24:c.G3333A:p.L1111L	1qC2
chr1	62010345	62010345	G	A	exonic	Pard3b	.	synonymous SNV	Pard3b:NM_001081050:exon3:c.G261A:p.K87K	1qC2
chr1	66646451	66646451	C	G	exonic	Unc80	.	nonsynonymous SNV	Unc80:NM_001368825:exon43:c.C6538G:p.P2180A,Unc80:NM_001368824:exon44:c.C6778G:p.P2260A,Unc80:NM_175510:exon44:c.C6733G:p.P2245A	1qC3
chr1	71649292	71649292	A	G	exonic	Fn1	.	nonsynonymous SNV	Fn1:NM_001276408:exon4:c.T452C:p.I151T,Fn1:NM_001276409:exon4:c.T452C:p.I151T,Fn1:NM_001276410:exon4:c.T452C:p.I151T,Fn1:NM_001276411:exon4:c.T452C:p.I151T,Fn1:NM_001276412:exon4:c.T452C:p.I151T,Fn1:NM_001276413:exon4:c.T452C:p.I151T,Fn1:NM_010233:exon4:c.T452C:p.I151T	1qC3
chr1	74562778	74562778	A	G	exonic	Plcd4	.	synonymous SNV	Plcd4:NM_001081456:exon12:c.A1710G:p.T570T,Plcd4:NM_148937:exon13:c.A1806G:p.T602T	1qC3
chr1	75278291	75278291	T	C	exonic	Resp18	.	nonsynonymous SNV	Resp18:NM_009049:exon1:c.A17G:p.K6R	1qC4
chr1	75480262	75480262	C	A	exonic	Tmem198	.	nonsynonymous SNV	Tmem198:NM_177056:exon2:c.C31A:p.Q11K	1qC4
chr1	75486756	75486756	G	A	exonic	Obsl1	.	nonsynonymous SNV	Obsl1:NM_178884:exon19:c.C5291T:p.T1764M	1qC4
chr1	77506662	77506662	A	C	exonic	Epha4	.	nonsynonymous SNV	Epha4:NM_007936:exon3:c.T709G:p.S237A	1qC4
chr1	78360175	78360175	C	T	exonic	Sgpp2	.	synonymous SNV	Sgpp2:NM_001004173:exon2:c.C189T:p.F63F	1qC4
chr1	80290091	80290091	A	G	exonic	Cul3	.	nonsynonymous SNV	Cul3:NM_016716:exon4:c.T530C:p.V177A,Cul3:NM_001313728:exon5:c.T377C:p.V126A	1qC5
chr1	82453196	82453196	A	C	exonic	Col4a4	.	nonsynonymous SNV	Col4a4:NM_007735:exon48:c.T4984G:p.L1662V	1qC5
chr1	83205964	83205964	A	T	exonic	Daw1	.	nonsynonymous SNV	Daw1:NM_001372245:exon8:c.A773T:p.K258M,Daw1:NM_027725:exon8:c.A734T:p.K245M,Daw1:NM_001372243:exon11:c.A1088T:p.K363M,Daw1:NM_001372244:exon11:c.A1049T:p.K350M	1qC5
chr1	83276608	83276608	T	A	exonic	Sphkap	.	nonsynonymous SNV	Sphkap:NM_172430:exon7:c.A3419T:p.N1140I,Sphkap:NM_001356547:exon8:c.A3494T:p.N1165I	1qC5
chr1	83277168	83277168	A	G	exonic	Sphkap	.	synonymous SNV	Sphkap:NM_172430:exon7:c.T2859C:p.F953F,Sphkap:NM_001356547:exon8:c.T2934C:p.F978F	1qC5
chr1	83278604	83278604	T	G	exonic	Sphkap	.	nonsynonymous SNV	Sphkap:NM_172430:exon7:c.A1423C:p.T475P,Sphkap:NM_001356547:exon8:c.A1498C:p.T500P	1qC5
chr1	85089575	85089575	C	G	exonic	A530032D15Rik	.	synonymous SNV	A530032D15Rik:NM_213615:exon6:c.G549C:p.V183V	1qC5
chr1	85099620	85099620	G	A	exonic	A530032D15Rik	.	nonsynonymous SNV	A530032D15Rik:NM_213615:exon3:c.C224T:p.A75V	1qC5
chr1	85246950	85246950	G	A	exonic	C130026I21Rik	.	nonsynonymous SNV	C130026I21Rik:NM_001037909:exon7:c.C779T:p.S260L,C130026I21Rik:NM_175219:exon8:c.C863T:p.S288L	1qC5
chr1	85247114	85247114	T	C	exonic	C130026I21Rik	.	synonymous SNV	C130026I21Rik:NM_001037909:exon7:c.A615G:p.G205G,C130026I21Rik:NM_175219:exon8:c.A699G:p.G233G	1qC5
chr1	85247125	85247125	G	C	exonic	C130026I21Rik	.	nonsynonymous SNV	C130026I21Rik:NM_001037909:exon7:c.C604G:p.P202A,C130026I21Rik:NM_175219:exon8:c.C688G:p.P230A	1qC5
chr1	85247131	85247131	G	C	exonic	C130026I21Rik	.	nonsynonymous SNV	C130026I21Rik:NM_001037909:exon7:c.C598G:p.P200A,C130026I21Rik:NM_175219:exon8:c.C682G:p.P228A	1qC5
chr1	85579079	85579079	T	G	exonic	Sp110	.	nonsynonymous SNV	Sp110:NM_030194:exon11:c.A1262C:p.E421A,Sp110:NM_175397:exon12:c.A1262C:p.E421A	1qC5
chr1	85579092	85579092	G	A	exonic	Sp110	.	nonsynonymous SNV	Sp110:NM_030194:exon11:c.C1249T:p.R417C,Sp110:NM_175397:exon12:c.C1249T:p.R417C	1qC5
chr1	85579128	85579128	C	T	exonic	Sp110	.	nonsynonymous SNV	Sp110:NM_030194:exon11:c.G1213A:p.G405R,Sp110:NM_175397:exon12:c.G1213A:p.G405R	1qC5
chr1	85586280	85586280	C	T	exonic	Sp110	.	nonsynonymous SNV	Sp110:NM_030194:exon7:c.G755A:p.R252H,Sp110:NM_175397:exon8:c.G755A:p.R252H	1qC5
chr1	85586282	85586282	T	C	exonic	Sp110	.	synonymous SNV	Sp110:NM_030194:exon7:c.A753G:p.K251K,Sp110:NM_175397:exon8:c.A753G:p.K251K	1qC5
chr1	85615204	85615204	T	C	exonic	Sp140	.	synonymous SNV	Sp140:NM_001013817:exon5:c.T435C:p.C145C	1qC5
chr1	85615212	85615212	C	G	exonic	Sp140	.	nonsynonymous SNV	Sp140:NM_001013817:exon5:c.C443G:p.T148R	1qC5
chr1	85643220	85643220	G	A	exonic	Sp140	.	synonymous SNV	Sp140:NM_001013817:exon16:c.G1380A:p.V460V	1qC5
chr1	85643221	85643221	A	G	exonic	Sp140	.	nonsynonymous SNV	Sp140:NM_001013817:exon16:c.A1381G:p.S461G	1qC5
chr1	86427736	86427736	C	A	exonic	Tex44	.	nonsynonymous SNV	Tex44:NM_027966:exon1:c.C1366A:p.L456I	1qC5
chr1	88055842	88055842	T	C	exonic	Ugt1a10	.	nonsynonymous SNV	Ugt1a10:NM_201641:exon1:c.T361C:p.F121L	1qD
chr1	88212021	88212021	G	A	exonic	Ugt1a1	.	nonsynonymous SNV	Ugt1a1:NM_201645:exon1:c.G20A:p.S7N	1qD
chr1	88212084	88212084	A	T	exonic	Ugt1a1	.	nonsynonymous SNV	Ugt1a1:NM_201645:exon1:c.A83T:p.H28L	1qD
chr1	88212093	88212093	G	A	exonic	Ugt1a1	.	nonsynonymous SNV	Ugt1a1:NM_201645:exon1:c.G92A:p.R31K	1qD
chr1	88212136	88212136	G	A	exonic	Ugt1a1	.	nonsynonymous SNV	Ugt1a1:NM_201645:exon1:c.G135A:p.M45I	1qD
chr1	88212141	88212141	G	T	exonic	Ugt1a1	.	nonsynonymous SNV	Ugt1a1:NM_201645:exon1:c.G140T:p.G47V	1qD
chr1	88212244	88212244	C	T	exonic	Ugt1a1	.	synonymous SNV	Ugt1a1:NM_201645:exon1:c.C243T:p.F81F	1qD
chr1	88212297	88212297	G	A	exonic	Ugt1a1	.	nonsynonymous SNV	Ugt1a1:NM_201645:exon1:c.G296A:p.R99Q	1qD
chr1	88212317	88212317	T	C	exonic	Ugt1a1	.	nonsynonymous SNV	Ugt1a1:NM_201645:exon1:c.T316C:p.S106P	1qD
chr1	88212321	88212321	T	G	exonic	Ugt1a1	.	nonsynonymous SNV	Ugt1a1:NM_201645:exon1:c.T320G:p.F107C	1qD
chr1	88212331	88212331	C	T	exonic	Ugt1a1	.	synonymous SNV	Ugt1a1:NM_201645:exon1:c.C330T:p.R110R	1qD
chr1	88212381	88212381	C	T	exonic	Ugt1a1	.	nonsynonymous SNV	Ugt1a1:NM_201645:exon1:c.C380T:p.A127V	1qD
chr1	88212382	88212382	T	A	exonic	Ugt1a1	.	synonymous SNV	Ugt1a1:NM_201645:exon1:c.T381A:p.A127A	1qD
chr1	88212392	88212392	C	T	exonic	Ugt1a1	.	nonsynonymous SNV	Ugt1a1:NM_201645:exon1:c.C391T:p.H131Y	1qD
chr1	88212409	88212409	C	T	exonic	Ugt1a1	.	synonymous SNV	Ugt1a1:NM_201645:exon1:c.C408T:p.A136A	1qD
chr1	88212452	88212452	C	A	exonic	Ugt1a1	.	nonsynonymous SNV	Ugt1a1:NM_201645:exon1:c.C451A:p.L151M	1qD
chr1	88212465	88212465	T	C	exonic	Ugt1a1	.	nonsynonymous SNV	Ugt1a1:NM_201645:exon1:c.T464C:p.F155S	1qD
chr1	88212528	88212528	A	C	exonic	Ugt1a1	.	nonsynonymous SNV	Ugt1a1:NM_201645:exon1:c.A527C:p.K176T	1qD
chr1	88212536	88212536	T	C	exonic	Ugt1a1	.	nonsynonymous SNV	Ugt1a1:NM_201645:exon1:c.T535C:p.C179R	1qD
chr1	88212549	88212549	C	T	exonic	Ugt1a1	.	nonsynonymous SNV	Ugt1a1:NM_201645:exon1:c.C548T:p.S183L	1qD
chr1	88212550	88212550	A	G	exonic	Ugt1a1	.	synonymous SNV	Ugt1a1:NM_201645:exon1:c.A549G:p.S183S	1qD
chr1	88212555	88212555	C	T	exonic	Ugt1a1	.	nonsynonymous SNV	Ugt1a1:NM_201645:exon1:c.C554T:p.A185V	1qD
chr1	88212568	88212568	C	T	exonic	Ugt1a1	.	synonymous SNV	Ugt1a1:NM_201645:exon1:c.C567T:p.P189P	1qD
chr1	88212637	88212637	G	A	exonic	Ugt1a1	.	synonymous SNV	Ugt1a1:NM_201645:exon1:c.G636A:p.V212V	1qD
chr1	88212655	88212655	C	T	exonic	Ugt1a1	.	synonymous SNV	Ugt1a1:NM_201645:exon1:c.C654T:p.A218A	1qD
chr1	88212672	88212672	T	G	exonic	Ugt1a1	.	nonsynonymous SNV	Ugt1a1:NM_201645:exon1:c.T671G:p.M224R	1qD
chr1	88212696	88212696	A	T	exonic	Ugt1a1	.	nonsynonymous SNV	Ugt1a1:NM_201645:exon1:c.A695T:p.Y232F	1qD
chr1	88212730	88212730	A	G	exonic	Ugt1a1	.	synonymous SNV	Ugt1a1:NM_201645:exon1:c.A729G:p.E243E	1qD
chr1	88212740	88212740	C	A	exonic	Ugt1a1	.	nonsynonymous SNV	Ugt1a1:NM_201645:exon1:c.C739A:p.Q247K	1qD
chr1	88215088	88215088	T	G	exonic	Ugt1a1;Ugt1a10;Ugt1a2;Ugt1a5;Ugt1a6a;Ugt1a6b;Ugt1a7c;Ugt1a8;Ugt1a9	.	synonymous SNV	Ugt1a8:NM_001378375:exon2:c.T900G:p.V300V,Ugt1a2:NM_013701:exon2:c.T909G:p.V303V,Ugt1a10:NM_201641:exon2:c.T900G:p.V300V,Ugt1a7c:NM_201642:exon2:c.T903G:p.V301V,Ugt1a5:NM_201643:exon2:c.T897G:p.V299V,Ugt1a9:NM_201644:exon2:c.T894G:p.V298V,Ugt1a1:NM_201645:exon2:c.T915G:p.V305V,Ugt1a6a:NM_145079:exon3:c.T903G:p.V301V,Ugt1a6b:NM_201410:exon3:c.T903G:p.V301V	1qD
chr1	88215174	88215174	C	T	exonic	Ugt1a1;Ugt1a10;Ugt1a2;Ugt1a5;Ugt1a6a;Ugt1a6b;Ugt1a7c;Ugt1a8;Ugt1a9	.	nonsynonymous SNV	Ugt1a8:NM_001378375:exon2:c.C986T:p.T329M,Ugt1a2:NM_013701:exon2:c.C995T:p.T332M,Ugt1a10:NM_201641:exon2:c.C986T:p.T329M,Ugt1a7c:NM_201642:exon2:c.C989T:p.T330M,Ugt1a5:NM_201643:exon2:c.C983T:p.T328M,Ugt1a9:NM_201644:exon2:c.C980T:p.T327M,Ugt1a1:NM_201645:exon2:c.C1001T:p.T334M,Ugt1a6a:NM_145079:exon3:c.C989T:p.T330M,Ugt1a6b:NM_201410:exon3:c.C989T:p.T330M	1qD
chr1	88216213	88216213	C	T	exonic	Ugt1a1;Ugt1a10;Ugt1a2;Ugt1a5;Ugt1a6a;Ugt1a6b;Ugt1a7c;Ugt1a8;Ugt1a9	.	nonsynonymous SNV	Ugt1a8:NM_001378375:exon4:c.C1151T:p.P384L,Ugt1a2:NM_013701:exon4:c.C1160T:p.P387L,Ugt1a10:NM_201641:exon4:c.C1151T:p.P384L,Ugt1a7c:NM_201642:exon4:c.C1154T:p.P385L,Ugt1a5:NM_201643:exon4:c.C1148T:p.P383L,Ugt1a9:NM_201644:exon4:c.C1145T:p.P382L,Ugt1a1:NM_201645:exon4:c.C1166T:p.P389L,Ugt1a6a:NM_145079:exon5:c.C1154T:p.P385L,Ugt1a6b:NM_201410:exon5:c.C1154T:p.P385L	1qD
chr1	88216260	88216260	C	T	exonic	Ugt1a1;Ugt1a10;Ugt1a2;Ugt1a5;Ugt1a6a;Ugt1a6b;Ugt1a7c;Ugt1a8;Ugt1a9	.	nonsynonymous SNV	Ugt1a8:NM_001378375:exon4:c.C1198T:p.R400C,Ugt1a2:NM_013701:exon4:c.C1207T:p.R403C,Ugt1a10:NM_201641:exon4:c.C1198T:p.R400C,Ugt1a7c:NM_201642:exon4:c.C1201T:p.R401C,Ugt1a5:NM_201643:exon4:c.C1195T:p.R399C,Ugt1a9:NM_201644:exon4:c.C1192T:p.R398C,Ugt1a1:NM_201645:exon4:c.C1213T:p.R405C,Ugt1a6a:NM_145079:exon5:c.C1201T:p.R401C,Ugt1a6b:NM_201410:exon5:c.C1201T:p.R401C	1qD
chr1	88216261	88216261	G	A	exonic	Ugt1a1;Ugt1a10;Ugt1a2;Ugt1a5;Ugt1a6a;Ugt1a6b;Ugt1a7c;Ugt1a8;Ugt1a9	.	nonsynonymous SNV	Ugt1a8:NM_001378375:exon4:c.G1199A:p.R400H,Ugt1a2:NM_013701:exon4:c.G1208A:p.R403H,Ugt1a10:NM_201641:exon4:c.G1199A:p.R400H,Ugt1a7c:NM_201642:exon4:c.G1202A:p.R401H,Ugt1a5:NM_201643:exon4:c.G1196A:p.R399H,Ugt1a9:NM_201644:exon4:c.G1193A:p.R398H,Ugt1a1:NM_201645:exon4:c.G1214A:p.R405H,Ugt1a6a:NM_145079:exon5:c.G1202A:p.R401H,Ugt1a6b:NM_201410:exon5:c.G1202A:p.R401H	1qD
chr1	88216273	88216273	G	C	exonic	Ugt1a1;Ugt1a10;Ugt1a2;Ugt1a5;Ugt1a6a;Ugt1a6b;Ugt1a7c;Ugt1a8;Ugt1a9	.	nonsynonymous SNV	Ugt1a8:NM_001378375:exon4:c.G1211C:p.R404P,Ugt1a2:NM_013701:exon4:c.G1220C:p.R407P,Ugt1a10:NM_201641:exon4:c.G1211C:p.R404P,Ugt1a7c:NM_201642:exon4:c.G1214C:p.R405P,Ugt1a5:NM_201643:exon4:c.G1208C:p.R403P,Ugt1a9:NM_201644:exon4:c.G1205C:p.R402P,Ugt1a1:NM_201645:exon4:c.G1226C:p.R409P,Ugt1a6a:NM_145079:exon5:c.G1214C:p.R405P,Ugt1a6b:NM_201410:exon5:c.G1214C:p.R405P	1qD
chr1	88218146	88218146	C	A	exonic	Ugt1a1;Ugt1a10;Ugt1a2;Ugt1a5;Ugt1a6a;Ugt1a6b;Ugt1a7c;Ugt1a8;Ugt1a9	.	nonsynonymous SNV	Ugt1a8:NM_001378375:exon5:c.C1315A:p.R439S,Ugt1a2:NM_013701:exon5:c.C1324A:p.R442S,Ugt1a10:NM_201641:exon5:c.C1315A:p.R439S,Ugt1a7c:NM_201642:exon5:c.C1318A:p.R440S,Ugt1a5:NM_201643:exon5:c.C1312A:p.R438S,Ugt1a9:NM_201644:exon5:c.C1309A:p.R437S,Ugt1a1:NM_201645:exon5:c.C1330A:p.R444S,Ugt1a6a:NM_145079:exon6:c.C1318A:p.R440S,Ugt1a6b:NM_201410:exon6:c.C1318A:p.R440S	1qD
chr1	88218240	88218240	A	T	exonic	Ugt1a1;Ugt1a10;Ugt1a2;Ugt1a5;Ugt1a6a;Ugt1a6b;Ugt1a7c;Ugt1a8;Ugt1a9	.	nonsynonymous SNV	Ugt1a8:NM_001378375:exon5:c.A1409T:p.H470L,Ugt1a2:NM_013701:exon5:c.A1418T:p.H473L,Ugt1a10:NM_201641:exon5:c.A1409T:p.H470L,Ugt1a7c:NM_201642:exon5:c.A1412T:p.H471L,Ugt1a5:NM_201643:exon5:c.A1406T:p.H469L,Ugt1a9:NM_201644:exon5:c.A1403T:p.H468L,Ugt1a1:NM_201645:exon5:c.A1424T:p.H475L,Ugt1a6a:NM_145079:exon6:c.A1412T:p.H471L,Ugt1a6b:NM_201410:exon6:c.A1412T:p.H471L	1qD
chr1	88218245	88218245	C	T	exonic	Ugt1a1;Ugt1a10;Ugt1a2;Ugt1a5;Ugt1a6a;Ugt1a6b;Ugt1a7c;Ugt1a8;Ugt1a9	.	nonsynonymous SNV	Ugt1a8:NM_001378375:exon5:c.C1414T:p.R472C,Ugt1a2:NM_013701:exon5:c.C1423T:p.R475C,Ugt1a10:NM_201641:exon5:c.C1414T:p.R472C,Ugt1a7c:NM_201642:exon5:c.C1417T:p.R473C,Ugt1a5:NM_201643:exon5:c.C1411T:p.R471C,Ugt1a9:NM_201644:exon5:c.C1408T:p.R470C,Ugt1a1:NM_201645:exon5:c.C1429T:p.R477C,Ugt1a6a:NM_145079:exon6:c.C1417T:p.R473C,Ugt1a6b:NM_201410:exon6:c.C1417T:p.R473C	1qD
chr1	88218249	88218249	C	T	exonic	Ugt1a1;Ugt1a10;Ugt1a2;Ugt1a5;Ugt1a6a;Ugt1a6b;Ugt1a7c;Ugt1a8;Ugt1a9	.	nonsynonymous SNV	Ugt1a8:NM_001378375:exon5:c.C1418T:p.P473L,Ugt1a2:NM_013701:exon5:c.C1427T:p.P476L,Ugt1a10:NM_201641:exon5:c.C1418T:p.P473L,Ugt1a7c:NM_201642:exon5:c.C1421T:p.P474L,Ugt1a5:NM_201643:exon5:c.C1415T:p.P472L,Ugt1a9:NM_201644:exon5:c.C1412T:p.P471L,Ugt1a1:NM_201645:exon5:c.C1433T:p.P478L,Ugt1a6a:NM_145079:exon6:c.C1421T:p.P474L,Ugt1a6b:NM_201410:exon6:c.C1421T:p.P474L	1qD
chr1	88218279	88218279	A	T	exonic	Ugt1a1;Ugt1a10;Ugt1a2;Ugt1a5;Ugt1a6a;Ugt1a6b;Ugt1a7c;Ugt1a8;Ugt1a9	.	nonsynonymous SNV	Ugt1a8:NM_001378375:exon5:c.A1448T:p.Y483F,Ugt1a2:NM_013701:exon5:c.A1457T:p.Y486F,Ugt1a10:NM_201641:exon5:c.A1448T:p.Y483F,Ugt1a7c:NM_201642:exon5:c.A1451T:p.Y484F,Ugt1a5:NM_201643:exon5:c.A1445T:p.Y482F,Ugt1a9:NM_201644:exon5:c.A1442T:p.Y481F,Ugt1a1:NM_201645:exon5:c.A1463T:p.Y488F,Ugt1a6a:NM_145079:exon6:c.A1451T:p.Y484F,Ugt1a6b:NM_201410:exon6:c.A1451T:p.Y484F	1qD
chr1	88218283	88218283	C	G	exonic	Ugt1a1;Ugt1a10;Ugt1a2;Ugt1a5;Ugt1a6a;Ugt1a6b;Ugt1a7c;Ugt1a8;Ugt1a9	.	nonsynonymous SNV	Ugt1a8:NM_001378375:exon5:c.C1452G:p.H484Q,Ugt1a2:NM_013701:exon5:c.C1461G:p.H487Q,Ugt1a10:NM_201641:exon5:c.C1452G:p.H484Q,Ugt1a7c:NM_201642:exon5:c.C1455G:p.H485Q,Ugt1a5:NM_201643:exon5:c.C1449G:p.H483Q,Ugt1a9:NM_201644:exon5:c.C1446G:p.H482Q,Ugt1a1:NM_201645:exon5:c.C1467G:p.H489Q,Ugt1a6a:NM_145079:exon6:c.C1455G:p.H485Q,Ugt1a6b:NM_201410:exon6:c.C1455G:p.H485Q	1qD
chr1	88218360	88218360	G	A	exonic	Ugt1a1;Ugt1a10;Ugt1a2;Ugt1a5;Ugt1a6a;Ugt1a6b;Ugt1a7c;Ugt1a8;Ugt1a9	.	nonsynonymous SNV	Ugt1a8:NM_001378375:exon5:c.G1529A:p.G510D,Ugt1a2:NM_013701:exon5:c.G1538A:p.G513D,Ugt1a10:NM_201641:exon5:c.G1529A:p.G510D,Ugt1a7c:NM_201642:exon5:c.G1532A:p.G511D,Ugt1a5:NM_201643:exon5:c.G1526A:p.G509D,Ugt1a9:NM_201644:exon5:c.G1523A:p.G508D,Ugt1a1:NM_201645:exon5:c.G1544A:p.G515D,Ugt1a6a:NM_145079:exon6:c.G1532A:p.G511D,Ugt1a6b:NM_201410:exon6:c.G1532A:p.G511D	1qD
chr1	88218388	88218388	G	A	exonic	Ugt1a1;Ugt1a10;Ugt1a2;Ugt1a5;Ugt1a6a;Ugt1a6b;Ugt1a7c;Ugt1a8;Ugt1a9	.	synonymous SNV	Ugt1a8:NM_001378375:exon5:c.G1557A:p.G519G,Ugt1a2:NM_013701:exon5:c.G1566A:p.G522G,Ugt1a10:NM_201641:exon5:c.G1557A:p.G519G,Ugt1a7c:NM_201642:exon5:c.G1560A:p.G520G,Ugt1a5:NM_201643:exon5:c.G1554A:p.G518G,Ugt1a9:NM_201644:exon5:c.G1551A:p.G517G,Ugt1a1:NM_201645:exon5:c.G1572A:p.G524G,Ugt1a6a:NM_145079:exon6:c.G1560A:p.G520G,Ugt1a6b:NM_201410:exon6:c.G1560A:p.G520G	1qD
chr1	88218390	88218390	G	A	exonic	Ugt1a1;Ugt1a10;Ugt1a2;Ugt1a5;Ugt1a6a;Ugt1a6b;Ugt1a7c;Ugt1a8;Ugt1a9	.	nonsynonymous SNV	Ugt1a8:NM_001378375:exon5:c.G1559A:p.R520Q,Ugt1a2:NM_013701:exon5:c.G1568A:p.R523Q,Ugt1a10:NM_201641:exon5:c.G1559A:p.R520Q,Ugt1a7c:NM_201642:exon5:c.G1562A:p.R521Q,Ugt1a5:NM_201643:exon5:c.G1556A:p.R519Q,Ugt1a9:NM_201644:exon5:c.G1553A:p.R518Q,Ugt1a1:NM_201645:exon5:c.G1574A:p.R525Q,Ugt1a6a:NM_145079:exon6:c.G1562A:p.R521Q,Ugt1a6b:NM_201410:exon6:c.G1562A:p.R521Q	1qD
chr1	88228343	88228343	G	A	exonic	Mroh2a	.	nonsynonymous SNV	Mroh2a:NM_001281466:exon3:c.G196A:p.E66K	1qD
chr1	88228380	88228380	C	A	exonic	Mroh2a	.	nonsynonymous SNV	Mroh2a:NM_001281466:exon3:c.C233A:p.A78E	1qD
chr1	88230368	88230368	C	A	exonic	Mroh2a	.	synonymous SNV	Mroh2a:NM_001281466:exon4:c.C288A:p.I96I	1qD
chr1	88230637	88230637	T	C	exonic	Mroh2a	.	synonymous SNV	Mroh2a:NM_001281466:exon5:c.T405C:p.F135F	1qD
chr1	88230644	88230644	G	A	exonic	Mroh2a	.	nonsynonymous SNV	Mroh2a:NM_001281466:exon5:c.G412A:p.A138T	1qD
chr1	88230650	88230650	G	A	exonic	Mroh2a	.	nonsynonymous SNV	Mroh2a:NM_001281466:exon5:c.G418A:p.V140M	1qD
chr1	88230667	88230667	A	C	exonic	Mroh2a	.	synonymous SNV	Mroh2a:NM_001281466:exon5:c.A435C:p.L145L	1qD
chr1	88230668	88230668	G	A	exonic	Mroh2a	.	nonsynonymous SNV	Mroh2a:NM_001281466:exon5:c.G436A:p.V146M	1qD
chr1	88230680	88230680	C	T	exonic	Mroh2a	.	stopgain	Mroh2a:NM_001281466:exon5:c.C448T:p.R150X	1qD
chr1	88230746	88230746	G	A	exonic	Mroh2a	.	nonsynonymous SNV	Mroh2a:NM_001281466:exon5:c.G514A:p.E172K	1qD
chr1	88232292	88232292	C	T	exonic	Mroh2a	.	nonsynonymous SNV	Mroh2a:NM_001281466:exon6:c.C605T:p.T202M	1qD
chr1	88232324	88232324	C	T	exonic	Mroh2a	.	nonsynonymous SNV	Mroh2a:NM_001281466:exon6:c.C637T:p.R213C	1qD
chr1	88233327	88233327	G	A	exonic	Mroh2a	.	synonymous SNV	Mroh2a:NM_001281466:exon7:c.G666A:p.T222T	1qD
chr1	88233330	88233330	C	T	exonic	Mroh2a	.	synonymous SNV	Mroh2a:NM_001281466:exon7:c.C669T:p.F223F	1qD
chr1	88233340	88233340	G	A	exonic	Mroh2a	.	nonsynonymous SNV	Mroh2a:NM_001281466:exon7:c.G679A:p.V227M	1qD
chr1	88233390	88233390	G	A	exonic	Mroh2a	.	synonymous SNV	Mroh2a:NM_001281466:exon7:c.G729A:p.T243T	1qD
chr1	88233393	88233393	G	A	exonic	Mroh2a	.	synonymous SNV	Mroh2a:NM_001281466:exon7:c.G732A:p.E244E	1qD
chr1	88233417	88233417	C	T	exonic	Mroh2a	.	synonymous SNV	Mroh2a:NM_001281466:exon7:c.C756T:p.F252F	1qD
chr1	88233428	88233428	G	A	exonic	Mroh2a	.	nonsynonymous SNV	Mroh2a:NM_001281466:exon7:c.G767A:p.R256Q	1qD
chr1	88233435	88233435	C	T	exonic	Mroh2a	.	synonymous SNV	Mroh2a:NM_001281466:exon7:c.C774T:p.F258F	1qD
chr1	88233442	88233442	G	T	exonic	Mroh2a	.	nonsynonymous SNV	Mroh2a:NM_001281466:exon7:c.G781T:p.V261L	1qD
chr1	88234040	88234040	G	C	exonic	Mroh2a	.	synonymous SNV	Mroh2a:NM_001281466:exon8:c.G846C:p.L282L	1qD
chr1	88234120	88234120	G	A	exonic	Mroh2a	.	nonsynonymous SNV	Mroh2a:NM_001281466:exon8:c.G926A:p.G309D	1qD
chr1	88234137	88234137	G	A	exonic	Mroh2a	.	nonsynonymous SNV	Mroh2a:NM_001281466:exon8:c.G943A:p.V315I	1qD
chr1	88234981	88234981	G	A	exonic	Mroh2a	.	synonymous SNV	Mroh2a:NM_001281466:exon9:c.G963A:p.Q321Q	1qD
chr1	88234996	88234996	G	A	exonic	Mroh2a	.	synonymous SNV	Mroh2a:NM_001281466:exon9:c.G978A:p.S326S	1qD
chr1	88235023	88235023	G	A	exonic	Mroh2a	.	synonymous SNV	Mroh2a:NM_001281466:exon9:c.G1005A:p.P335P	1qD
chr1	88235051	88235051	T	C	exonic	Mroh2a	.	synonymous SNV	Mroh2a:NM_001281466:exon9:c.T1033C:p.L345L	1qD
chr1	88235214	88235214	C	T	exonic	Mroh2a	.	stopgain	Mroh2a:NM_001281466:exon10:c.C1069T:p.Q357X	1qD
chr1	88235254	88235254	G	A	exonic	Mroh2a	.	nonsynonymous SNV	Mroh2a:NM_001281466:exon10:c.G1109A:p.C370Y	1qD
chr1	88235376	88235376	G	A	exonic	Mroh2a	.	nonsynonymous SNV	Mroh2a:NM_001281466:exon11:c.G1127A:p.R376H	1qD
chr1	88235442	88235442	G	A	exonic	Mroh2a	.	nonsynonymous SNV	Mroh2a:NM_001281466:exon11:c.G1193A:p.R398H	1qD
chr1	88235449	88235449	G	T	exonic	Mroh2a	.	synonymous SNV	Mroh2a:NM_001281466:exon11:c.G1200T:p.G400G	1qD
chr1	88236665	88236665	T	G	exonic	Mroh2a	.	nonsynonymous SNV	Mroh2a:NM_001281466:exon12:c.T1248G:p.I416M	1qD
chr1	88236695	88236695	C	G	exonic	Mroh2a	.	synonymous SNV	Mroh2a:NM_001281466:exon12:c.C1278G:p.R426R	1qD
chr1	88237491	88237491	C	T	exonic	Mroh2a	.	stopgain	Mroh2a:NM_001281466:exon13:c.C1333T:p.R445X	1qD
chr1	88237541	88237541	C	A	exonic	Mroh2a	.	synonymous SNV	Mroh2a:NM_001281466:exon13:c.C1383A:p.G461G	1qD
chr1	88237852	88237852	G	T	exonic	Mroh2a	.	nonsynonymous SNV	Mroh2a:NM_001281466:exon14:c.G1442T:p.R481L	1qD
chr1	88237853	88237853	A	C	exonic	Mroh2a	.	synonymous SNV	Mroh2a:NM_001281466:exon14:c.A1443C:p.R481R	1qD
chr1	88237944	88237944	G	A	exonic	Mroh2a	.	nonsynonymous SNV	Mroh2a:NM_001281466:exon14:c.G1534A:p.G512S	1qD
chr1	88238947	88238947	A	G	exonic	Mroh2a	.	synonymous SNV	Mroh2a:NM_001281466:exon15:c.A1599G:p.A533A	1qD
chr1	88238983	88238983	C	T	exonic	Mroh2a	.	synonymous SNV	Mroh2a:NM_001281466:exon15:c.C1635T:p.A545A	1qD
chr1	88239006	88239006	A	C	exonic	Mroh2a	.	nonsynonymous SNV	Mroh2a:NM_001281466:exon15:c.A1658C:p.D553A	1qD
chr1	88240124	88240124	T	C	exonic	Mroh2a	.	synonymous SNV	Mroh2a:NM_001281466:exon16:c.T1699C:p.L567L	1qD
chr1	88240149	88240149	C	T	exonic	Mroh2a	.	nonsynonymous SNV	Mroh2a:NM_001281466:exon16:c.C1724T:p.A575V	1qD
chr1	88240703	88240703	G	A	exonic	Mroh2a	.	nonsynonymous SNV	Mroh2a:NM_001281466:exon17:c.G1759A:p.G587R	1qD
chr1	88240709	88240709	G	T	exonic	Mroh2a	.	nonsynonymous SNV	Mroh2a:NM_001281466:exon17:c.G1765T:p.G589C	1qD
chr1	88240802	88240802	C	T	exonic	Mroh2a	.	synonymous SNV	Mroh2a:NM_001281466:exon17:c.C1858T:p.L620L	1qD
chr1	88241093	88241093	C	T	exonic	Mroh2a	.	synonymous SNV	Mroh2a:NM_001281466:exon18:c.C1899T:p.N633N	1qD
chr1	88241584	88241584	G	A	exonic	Mroh2a	.	stopgain	Mroh2a:NM_001281466:exon19:c.G1971A:p.W657X	1qD
chr1	88241590	88241590	A	G	exonic	Mroh2a	.	synonymous SNV	Mroh2a:NM_001281466:exon19:c.A1977G:p.L659L	1qD
chr1	88241618	88241618	A	C	exonic	Mroh2a	.	nonsynonymous SNV	Mroh2a:NM_001281466:exon19:c.A2005C:p.I669L	1qD
chr1	88242417	88242417	G	T	exonic	Mroh2a	.	nonsynonymous SNV	Mroh2a:NM_001281466:exon20:c.G2051T:p.R684M	1qD
chr1	88242418	88242418	G	T	exonic	Mroh2a	.	nonsynonymous SNV	Mroh2a:NM_001281466:exon20:c.G2052T:p.R684S	1qD
chr1	88242420	88242420	C	A	exonic	Mroh2a	.	nonsynonymous SNV	Mroh2a:NM_001281466:exon20:c.C2054A:p.A685D	1qD
chr1	88242421	88242421	C	A	exonic	Mroh2a	.	synonymous SNV	Mroh2a:NM_001281466:exon20:c.C2055A:p.A685A	1qD
chr1	88242508	88242508	T	C	exonic	Mroh2a	.	synonymous SNV	Mroh2a:NM_001281466:exon20:c.T2142C:p.N714N	1qD
chr1	88242511	88242511	T	C	exonic	Mroh2a	.	synonymous SNV	Mroh2a:NM_001281466:exon20:c.T2145C:p.D715D	1qD
chr1	88242760	88242760	C	T	exonic	Mroh2a	.	nonsynonymous SNV	Mroh2a:NM_001281466:exon21:c.C2249T:p.S750L	1qD
chr1	88242764	88242764	A	G	exonic	Mroh2a	.	synonymous SNV	Mroh2a:NM_001281466:exon21:c.A2253G:p.E751E	1qD
chr1	88242779	88242779	C	T	exonic	Mroh2a	.	synonymous SNV	Mroh2a:NM_001281466:exon21:c.C2268T:p.I756I	1qD
chr1	88243950	88243950	G	A	exonic	Mroh2a	.	nonsynonymous SNV	Mroh2a:NM_001281466:exon22:c.G2300A:p.R767Q	1qD
chr1	88244014	88244014	G	A	exonic	Mroh2a	.	synonymous SNV	Mroh2a:NM_001281466:exon22:c.G2364A:p.Q788Q	1qD
chr1	88244083	88244083	G	A	exonic	Mroh2a	.	synonymous SNV	Mroh2a:NM_001281466:exon22:c.G2433A:p.Q811Q	1qD
chr1	88244970	88244970	G	T	exonic	Mroh2a	.	nonsynonymous SNV	Mroh2a:NM_001281466:exon23:c.G2460T:p.M820I	1qD
chr1	88244995	88244995	G	T	exonic	Mroh2a	.	nonsynonymous SNV	Mroh2a:NM_001281466:exon23:c.G2485T:p.A829S	1qD
chr1	88245989	88245989	T	C	exonic	Mroh2a	.	nonsynonymous SNV	Mroh2a:NM_001281466:exon24:c.T2558C:p.V853A	1qD
chr1	88246017	88246017	C	T	exonic	Mroh2a	.	synonymous SNV	Mroh2a:NM_001281466:exon24:c.C2586T:p.H862H	1qD
chr1	88246042	88246042	G	C	exonic	Mroh2a	.	nonsynonymous SNV	Mroh2a:NM_001281466:exon24:c.G2611C:p.A871P	1qD
chr1	88246065	88246065	A	G	exonic	Mroh2a	.	synonymous SNV	Mroh2a:NM_001281466:exon24:c.A2634G:p.L878L	1qD
chr1	88247139	88247139	G	A	exonic	Mroh2a	.	synonymous SNV	Mroh2a:NM_001281466:exon25:c.G2640A:p.T880T	1qD
chr1	88247140	88247140	A	C	exonic	Mroh2a	.	nonsynonymous SNV	Mroh2a:NM_001281466:exon25:c.A2641C:p.M881L	1qD
chr1	88247172	88247172	A	G	exonic	Mroh2a	.	synonymous SNV	Mroh2a:NM_001281466:exon25:c.A2673G:p.T891T	1qD
chr1	88247199	88247199	C	T	exonic	Mroh2a	.	synonymous SNV	Mroh2a:NM_001281466:exon25:c.C2700T:p.T900T	1qD
chr1	88247232	88247232	T	C	exonic	Mroh2a	.	synonymous SNV	Mroh2a:NM_001281466:exon25:c.T2733C:p.N911N	1qD
chr1	88247237	88247237	C	T	exonic	Mroh2a	.	nonsynonymous SNV	Mroh2a:NM_001281466:exon25:c.C2738T:p.S913F	1qD
chr1	88247763	88247763	A	G	exonic	Mroh2a	.	nonsynonymous SNV	Mroh2a:NM_001281466:exon26:c.A2761G:p.T921A	1qD
chr1	88248555	88248555	C	A	exonic	Mroh2a	.	nonsynonymous SNV	Mroh2a:NM_001281466:exon27:c.C2845A:p.L949M	1qD
chr1	88248584	88248584	G	A	exonic	Mroh2a	.	synonymous SNV	Mroh2a:NM_001281466:exon27:c.G2874A:p.E958E	1qD
chr1	88248614	88248614	T	C	exonic	Mroh2a	.	synonymous SNV	Mroh2a:NM_001281466:exon27:c.T2904C:p.H968H	1qD
chr1	88248621	88248621	C	T	exonic	Mroh2a	.	nonsynonymous SNV	Mroh2a:NM_001281466:exon27:c.C2911T:p.L971F	1qD
chr1	88249744	88249744	C	T	exonic	Mroh2a	.	synonymous SNV	Mroh2a:NM_001281466:exon28:c.C2988T:p.L996L	1qD
chr1	88250266	88250266	A	G	exonic	Mroh2a	.	synonymous SNV	Mroh2a:NM_001281466:exon29:c.A3072G:p.V1024V	1qD
chr1	88250268	88250268	G	A	exonic	Mroh2a	.	nonsynonymous SNV	Mroh2a:NM_001281466:exon29:c.G3074A:p.S1025N	1qD
chr1	88250342	88250342	G	A	exonic	Mroh2a	.	nonsynonymous SNV	Mroh2a:NM_001281466:exon29:c.G3148A:p.D1050N	1qD
chr1	88251267	88251267	G	T	exonic	Mroh2a	.	nonsynonymous SNV	Mroh2a:NM_001281466:exon30:c.G3212T:p.C1071F	1qD
chr1	88251346	88251346	C	T	exonic	Mroh2a	.	synonymous SNV	Mroh2a:NM_001281466:exon30:c.C3291T:p.V1097V	1qD
chr1	88251365	88251365	C	T	exonic	Mroh2a	.	nonsynonymous SNV	Mroh2a:NM_001281466:exon30:c.C3310T:p.L1104F	1qD
chr1	88251374	88251374	C	T	exonic	Mroh2a	.	nonsynonymous SNV	Mroh2a:NM_001281466:exon30:c.C3319T:p.R1107W	1qD
chr1	88251385	88251385	G	T	exonic	Mroh2a	.	nonsynonymous SNV	Mroh2a:NM_001281466:exon30:c.G3330T:p.E1110D	1qD
chr1	88252383	88252383	T	C	exonic	Mroh2a	.	synonymous SNV	Mroh2a:NM_001281466:exon31:c.T3390C:p.D1130D	1qD
chr1	88252401	88252401	A	G	exonic	Mroh2a	.	synonymous SNV	Mroh2a:NM_001281466:exon31:c.A3408G:p.R1136R	1qD
chr1	88252458	88252458	A	G	exonic	Mroh2a	.	synonymous SNV	Mroh2a:NM_001281466:exon31:c.A3465G:p.T1155T	1qD
chr1	88252477	88252477	C	T	exonic	Mroh2a	.	synonymous SNV	Mroh2a:NM_001281466:exon31:c.C3484T:p.L1162L	1qD
chr1	88254906	88254906	A	C	exonic	Mroh2a	.	synonymous SNV	Mroh2a:NM_001281466:exon32:c.A3546C:p.A1182A	1qD
chr1	88254935	88254935	G	T	exonic	Mroh2a	.	nonsynonymous SNV	Mroh2a:NM_001281466:exon32:c.G3575T:p.R1192L	1qD
chr1	88254948	88254948	G	A	exonic	Mroh2a	.	synonymous SNV	Mroh2a:NM_001281466:exon32:c.G3588A:p.R1196R	1qD
chr1	88254965	88254965	A	T	exonic	Mroh2a	.	nonsynonymous SNV	Mroh2a:NM_001281466:exon32:c.A3605T:p.N1202I	1qD
chr1	88255203	88255203	G	A	exonic	Mroh2a	.	synonymous SNV	Mroh2a:NM_001281466:exon33:c.G3771A:p.G1257G	1qD
chr1	88255245	88255245	T	C	exonic	Mroh2a	.	synonymous SNV	Mroh2a:NM_001281466:exon33:c.T3813C:p.V1271V	1qD
chr1	88255275	88255275	C	T	exonic	Mroh2a	.	synonymous SNV	Mroh2a:NM_001281466:exon33:c.C3843T:p.T1281T	1qD
chr1	88255565	88255565	C	A	exonic	Mroh2a	.	nonsynonymous SNV	Mroh2a:NM_001281466:exon34:c.C3874A:p.L1292I	1qD
chr1	88255607	88255607	T	C	exonic	Mroh2a	.	synonymous SNV	Mroh2a:NM_001281466:exon34:c.T3916C:p.L1306L	1qD
chr1	88255633	88255633	G	A	exonic	Mroh2a	.	synonymous SNV	Mroh2a:NM_001281466:exon34:c.G3942A:p.L1314L	1qD
chr1	88255655	88255655	C	G	exonic	Mroh2a	.	nonsynonymous SNV	Mroh2a:NM_001281466:exon34:c.C3964G:p.L1322V	1qD
chr1	88256090	88256090	G	A	exonic	Mroh2a	.	synonymous SNV	Mroh2a:NM_001281466:exon35:c.G4023A:p.Q1341Q	1qD
chr1	88256096	88256096	G	A	exonic	Mroh2a	.	synonymous SNV	Mroh2a:NM_001281466:exon35:c.G4029A:p.L1343L	1qD
chr1	88256127	88256127	G	A	exonic	Mroh2a	.	nonsynonymous SNV	Mroh2a:NM_001281466:exon35:c.G4060A:p.E1354K	1qD
chr1	88256413	88256413	C	T	exonic	Mroh2a	.	nonsynonymous SNV	Mroh2a:NM_001281466:exon36:c.C4118T:p.P1373L	1qD
chr1	88256468	88256468	T	C	exonic	Mroh2a	.	synonymous SNV	Mroh2a:NM_001281466:exon36:c.T4173C:p.G1391G	1qD
chr1	88256545	88256545	G	A	exonic	Mroh2a	.	nonsynonymous SNV	Mroh2a:NM_001281466:exon36:c.G4250A:p.R1417Q	1qD
chr1	88256705	88256705	C	T	exonic	Mroh2a	.	stopgain	Mroh2a:NM_001281466:exon37:c.C4309T:p.Q1437X	1qD
chr1	88256727	88256727	C	T	exonic	Mroh2a	.	nonsynonymous SNV	Mroh2a:NM_001281466:exon37:c.C4331T:p.A1444V	1qD
chr1	88256754	88256754	T	C	exonic	Mroh2a	.	nonsynonymous SNV	Mroh2a:NM_001281466:exon37:c.T4358C:p.V1453A	1qD
chr1	88256798	88256798	G	A	exonic	Mroh2a	.	nonsynonymous SNV	Mroh2a:NM_001281466:exon37:c.G4402A:p.A1468T	1qD
chr1	88257739	88257739	T	C	exonic	Mroh2a	.	synonymous SNV	Mroh2a:NM_001281466:exon38:c.T4467C:p.F1489F	1qD
chr1	88258633	88258633	C	T	exonic	Mroh2a	.	synonymous SNV	Mroh2a:NM_001281466:exon39:c.C4644T:p.S1548S	1qD
chr1	88259567	88259567	A	G	exonic	Mroh2a	.	synonymous SNV	Mroh2a:NM_001281466:exon41:c.A4866G:p.K1622K	1qD
chr1	88259973	88259973	C	T	exonic	Mroh2a	.	synonymous SNV	Mroh2a:NM_001281466:exon42:c.C4963T:p.L1655L	1qD
chr1	88260002	88260002	A	G	exonic	Mroh2a	.	synonymous SNV	Mroh2a:NM_001281466:exon42:c.A4992G:p.L1664L	1qD
chr1	88260003	88260003	G	T	exonic	Mroh2a	.	nonsynonymous SNV	Mroh2a:NM_001281466:exon42:c.G4993T:p.A1665S	1qD
chr1	88260004	88260004	C	T	exonic	Mroh2a	.	nonsynonymous SNV	Mroh2a:NM_001281466:exon42:c.C4994T:p.A1665V	1qD
chr1	88260005	88260005	G	A	exonic	Mroh2a	.	synonymous SNV	Mroh2a:NM_001281466:exon42:c.G4995A:p.A1665A	1qD
chr1	88265185	88265185	G	A	exonic	A730008H23Rik;Hjurp	.	nonsynonymous SNV	A730008H23Rik:NM_172505:exon5:c.C1772T:p.P591L,Hjurp:NM_198652:exon8:c.C2000T:p.P667L	1qD
chr1	88265210	88265210	C	T	exonic	A730008H23Rik;Hjurp	.	nonsynonymous SNV	A730008H23Rik:NM_172505:exon5:c.G1747A:p.D583N,Hjurp:NM_198652:exon8:c.G1975A:p.D659N	1qD
chr1	88265258	88265258	A	G	exonic	A730008H23Rik;Hjurp	.	nonsynonymous SNV	A730008H23Rik:NM_172505:exon5:c.T1699C:p.C567R,Hjurp:NM_198652:exon8:c.T1927C:p.C643R	1qD
chr1	88265271	88265271	C	A	exonic	A730008H23Rik;Hjurp	.	synonymous SNV	A730008H23Rik:NM_172505:exon5:c.G1686T:p.L562L,Hjurp:NM_198652:exon8:c.G1914T:p.L638L	1qD
chr1	88265279	88265279	A	G	exonic	A730008H23Rik;Hjurp	.	nonsynonymous SNV	A730008H23Rik:NM_172505:exon5:c.T1678C:p.S560P,Hjurp:NM_198652:exon8:c.T1906C:p.S636P	1qD
chr1	88265280	88265280	G	C	exonic	A730008H23Rik;Hjurp	.	nonsynonymous SNV	A730008H23Rik:NM_172505:exon5:c.C1677G:p.D559E,Hjurp:NM_198652:exon8:c.C1905G:p.D635E	1qD
chr1	88265309	88265309	C	G	exonic	A730008H23Rik;Hjurp	.	nonsynonymous SNV	A730008H23Rik:NM_172505:exon5:c.G1648C:p.A550P,Hjurp:NM_198652:exon8:c.G1876C:p.A626P	1qD
chr1	88265472	88265472	C	T	exonic	A730008H23Rik;Hjurp	.	synonymous SNV	A730008H23Rik:NM_172505:exon5:c.G1485A:p.A495A,Hjurp:NM_198652:exon8:c.G1713A:p.A571A	1qD
chr1	88265570	88265570	T	A	exonic	A730008H23Rik;Hjurp	.	nonsynonymous SNV	A730008H23Rik:NM_172505:exon5:c.A1387T:p.S463C,Hjurp:NM_198652:exon8:c.A1615T:p.S539C	1qD
chr1	88265673	88265673	C	A	exonic	A730008H23Rik;Hjurp	.	synonymous SNV	A730008H23Rik:NM_172505:exon5:c.G1284T:p.P428P,Hjurp:NM_198652:exon8:c.G1512T:p.P504P	1qD
chr1	88265846	88265846	A	C	exonic	A730008H23Rik;Hjurp	.	nonsynonymous SNV	A730008H23Rik:NM_172505:exon5:c.T1111G:p.S371A,Hjurp:NM_198652:exon8:c.T1339G:p.S447A	1qD
chr1	88265892	88265892	C	G	exonic	A730008H23Rik;Hjurp	.	synonymous SNV	A730008H23Rik:NM_172505:exon5:c.G1065C:p.L355L,Hjurp:NM_198652:exon8:c.G1293C:p.L431L	1qD
chr1	88265980	88265980	T	G	exonic	A730008H23Rik;Hjurp	.	nonsynonymous SNV	A730008H23Rik:NM_172505:exon5:c.A977C:p.Q326P,Hjurp:NM_198652:exon8:c.A1205C:p.Q402P	1qD
chr1	88266046	88266046	A	C	exonic	A730008H23Rik;Hjurp	.	nonsynonymous SNV	A730008H23Rik:NM_172505:exon5:c.T911G:p.V304G,Hjurp:NM_198652:exon8:c.T1139G:p.V380G	1qD
chr1	88266121	88266121	G	A	exonic	A730008H23Rik;Hjurp	.	nonsynonymous SNV	A730008H23Rik:NM_172505:exon5:c.C836T:p.S279F,Hjurp:NM_198652:exon8:c.C1064T:p.S355F	1qD
chr1	88266195	88266195	G	A	exonic	A730008H23Rik;Hjurp	.	synonymous SNV	A730008H23Rik:NM_172505:exon5:c.C762T:p.H254H,Hjurp:NM_198652:exon8:c.C990T:p.H330H	1qD
chr1	88266241	88266241	G	T	exonic	A730008H23Rik;Hjurp	.	nonsynonymous SNV	A730008H23Rik:NM_172505:exon5:c.C716A:p.P239H,Hjurp:NM_198652:exon8:c.C944A:p.P315H	1qD
chr1	88266255	88266255	C	T	exonic	A730008H23Rik;Hjurp	.	synonymous SNV	A730008H23Rik:NM_172505:exon5:c.G702A:p.A234A,Hjurp:NM_198652:exon8:c.G930A:p.A310A	1qD
chr1	88266400	88266400	G	A	exonic	A730008H23Rik;Hjurp	.	nonsynonymous SNV	A730008H23Rik:NM_172505:exon5:c.C557T:p.P186L,Hjurp:NM_198652:exon8:c.C785T:p.P262L	1qD
chr1	88266452	88266452	C	T	exonic	A730008H23Rik;Hjurp	.	nonsynonymous SNV	A730008H23Rik:NM_172505:exon5:c.G505A:p.D169N,Hjurp:NM_198652:exon8:c.G733A:p.D245N	1qD
chr1	88266561	88266561	A	G	exonic	A730008H23Rik;Hjurp	.	synonymous SNV	A730008H23Rik:NM_172505:exon5:c.T396C:p.D132D,Hjurp:NM_198652:exon8:c.T624C:p.D208D	1qD
chr1	88266592	88266592	C	A	exonic	A730008H23Rik;Hjurp	.	nonsynonymous SNV	A730008H23Rik:NM_172505:exon5:c.G365T:p.G122V,Hjurp:NM_198652:exon8:c.G593T:p.G198V	1qD
chr1	88266616	88266616	T	C	exonic	A730008H23Rik;Hjurp	.	nonsynonymous SNV	A730008H23Rik:NM_172505:exon5:c.A341G:p.E114G,Hjurp:NM_198652:exon8:c.A569G:p.E190G	1qD
chr1	88269331	88269331	T	C	exonic	Hjurp	.	nonsynonymous SNV	Hjurp:NM_198652:exon6:c.A437G:p.E146G	1qD
chr1	88270269	88270269	A	G	exonic	Hjurp	.	nonsynonymous SNV	Hjurp:NM_198652:exon5:c.T287C:p.L96S	1qD
chr1	88270274	88270274	C	T	exonic	Hjurp	.	synonymous SNV	Hjurp:NM_198652:exon5:c.G282A:p.T94T	1qD
chr1	88272730	88272730	A	G	exonic	Hjurp	.	synonymous SNV	Hjurp:NM_198652:exon4:c.T255C:p.G85G	1qD
chr1	88275050	88275050	A	T	exonic	A730008H23Rik;Hjurp	.	nonsynonymous SNV	A730008H23Rik:NM_172505:exon3:c.T211A:p.Y71N,Hjurp:NM_198652:exon3:c.T211A:p.Y71N	1qD
chr1	88277238	88277238	T	C	exonic	A730008H23Rik;Hjurp	.	synonymous SNV	A730008H23Rik:NM_172505:exon2:c.A144G:p.L48L,Hjurp:NM_198652:exon2:c.A144G:p.L48L	1qD
chr1	88277245	88277245	C	G	exonic	A730008H23Rik;Hjurp	.	nonsynonymous SNV	A730008H23Rik:NM_172505:exon2:c.G137C:p.R46T,Hjurp:NM_198652:exon2:c.G137C:p.R46T	1qD
chr1	88277410	88277410	G	A	exonic	A730008H23Rik;Hjurp	.	synonymous SNV	A730008H23Rik:NM_172505:exon1:c.C60T:p.S20S,Hjurp:NM_198652:exon1:c.C60T:p.S20S	1qD
chr1	88277413	88277413	A	T	exonic	A730008H23Rik;Hjurp	.	nonsynonymous SNV	A730008H23Rik:NM_172505:exon1:c.T57A:p.S19R,Hjurp:NM_198652:exon1:c.T57A:p.S19R	1qD
chr1	88277422	88277422	C	A	exonic	A730008H23Rik;Hjurp	.	nonsynonymous SNV	A730008H23Rik:NM_172505:exon1:c.G48T:p.K16N,Hjurp:NM_198652:exon1:c.G48T:p.K16N	1qD
chr1	88277442	88277442	T	A	exonic	A730008H23Rik;Hjurp	.	nonsynonymous SNV	A730008H23Rik:NM_172505:exon1:c.A28T:p.R10W,Hjurp:NM_198652:exon1:c.A28T:p.R10W	1qD
chr1	93282819	93282819	C	T	exonic	Sned1	.	synonymous SNV	Sned1:NM_172463:exon21:c.C2841T:p.S947S	1qD
chr1	93316801	93316801	C	T	exonic	Pask	.	nonsynonymous SNV	Pask:NM_080850:exon14:c.G3497A:p.S1166N	1qD
chr1	93352588	93352588	T	C	exonic	Ppp1r7	.	nonsynonymous SNV	Ppp1r7:NM_023200:exon6:c.T509C:p.L170P	1qD
chr1	93354430	93354430	A	G	exonic	Ppp1r7	.	synonymous SNV	Ppp1r7:NM_023200:exon7:c.A702G:p.T234T	1qD
chr1	93431354	93431354	G	A	exonic	Hdlbp	.	synonymous SNV	Hdlbp:NM_001301364:exon6:c.C615T:p.I205I,Hdlbp:NM_001357556:exon6:c.C615T:p.I205I,Hdlbp:NM_133808:exon6:c.C615T:p.I205I	1qD
chr1	94008145	94008145	A	G	exonic	Gal3st2c	.	nonsynonymous SNV	Gal3st2c:NM_001039219:exon7:c.A218G:p.H73R	1qD
chr1	110085123	110085123	C	G	exonic	Cdh7	.	nonsynonymous SNV	Cdh7:NM_001316743:exon7:c.C1185G:p.I395M,Cdh7:NM_172853:exon7:c.C1185G:p.I395M,Cdh7:NM_001316744:exon8:c.C1011G:p.I337M	1qE2.1
chr1	116428800	116428800	C	A	exonic	Cntnap5a	.	synonymous SNV	Cntnap5a:NM_001077425:exon16:c.C2379A:p.V793V,Cntnap5a:NM_001371013:exon16:c.C2382A:p.V794V	1qE2.3
chr1	121554084	121554084	C	G	exonic	Ddx18	.	nonsynonymous SNV	Ddx18:NM_025860:exon13:c.G1895C:p.G632A	1qE2.3
chr1	126024832	126024832	G	A	exonic	Nckap5	.	nonsynonymous SNV	Nckap5:NM_172484:exon10:c.C3982T:p.R1328C,Nckap5:NM_001081756:exon12:c.C4186T:p.R1396C	1qE3
chr1	127891065	127891065	T	A	exonic	Rab3gap1	.	nonsynonymous SNV	Rab3gap1:NM_178690:exon5:c.T331A:p.F111I	1qE3
chr1	127930770	127930770	G	T	exonic	Rab3gap1	.	nonsynonymous SNV	Rab3gap1:NM_178690:exon17:c.G1615T:p.D539Y	1qE3
chr1	128344298	128344298	T	G	exonic	Mcm6	.	nonsynonymous SNV	Mcm6:NM_001313695:exon9:c.A1361C:p.N454T,Mcm6:NM_008567:exon9:c.A1361C:p.N454T	1qE3
chr1	130189892	130189892	A	T	exonic	Thsd7b	.	nonsynonymous SNV	Thsd7b:NM_172485:exon23:c.A4145T:p.K1382M	1qE4
chr1	130452479	130452479	T	G	exonic	Cd55	.	nonsynonymous SNV	Cd55:NM_010016:exon6:c.A761C:p.D254A	1qE4
chr1	131129233	131129233	A	G	exonic	Dyrk3	.	nonsynonymous SNV	Dyrk3:NM_145508:exon3:c.T1202C:p.L401P	1qE4
chr1	132611657	132611657	G	A	exonic	Nfasc	.	synonymous SNV	Nfasc:NM_001160316:exon10:c.C1185T:p.P395P,Nfasc:NM_001160318:exon11:c.C1134T:p.P378P,Nfasc:NM_001160317:exon12:c.C1185T:p.P395P,Nfasc:NM_182716:exon12:c.C1152T:p.P384P	1qE4
chr1	132994547	132994547	A	G	exonic	Mdm4	.	nonsynonymous SNV	Mdm4:NM_001302801:exon10:c.T859C:p.S287P,Mdm4:NM_001302802:exon10:c.T859C:p.S287P,Mdm4:NM_001302803:exon10:c.T856C:p.S286P,Mdm4:NM_001302804:exon10:c.T475C:p.S159P,Mdm4:NM_008575:exon11:c.T856C:p.S286P	1qE4
chr1	133735189	133735189	C	A	exonic	Atp2b4	.	nonsynonymous SNV	Atp2b4:NM_001167949:exon7:c.G961T:p.A321S,Atp2b4:NM_213616:exon7:c.G961T:p.A321S	1qE4
chr1	135120820	135120820	C	T	exonic	Ptprv	.	unknown	UNKNOWN	1qE4
chr1	136282834	136282834	C	T	exonic	Camsap2	.	nonsynonymous SNV	Camsap2:NM_001347110:exon10:c.G1198A:p.G400R,Camsap2:NM_001347109:exon11:c.G1231A:p.G411R	1qE4
chr1	136432451	136432451	A	C	exonic	Ddx59	.	nonsynonymous SNV	Ddx59:NM_026500:exon5:c.A1202C:p.N401T	1qE4
chr1	139754261	139754261	T	A	exonic	Gm4788	.	nonsynonymous SNV	Gm4788:NM_001029977:exon4:c.A596T:p.Q199L,Gm4788:NM_001160303:exon4:c.A596T:p.Q199L,Gm4788:NM_001160304:exon4:c.A596T:p.Q199L	1qF
chr1	140108904	140108904	A	G	exonic	Cfh	.	nonsynonymous SNV	Cfh:NM_009888:exon13:c.T1961C:p.L654P	1qF
chr1	140147718	140147718	G	A	exonic	Cfh	.	nonsynonymous SNV	Cfh:NM_009888:exon6:c.C781T:p.P261S	1qF
chr1	140573646	140573646	G	T	exonic	Kcnt2	.	nonsynonymous SNV	Kcnt2:NM_001081027:exon24:c.G2749T:p.D917Y	1qF
chr1	140584158	140584158	G	A	exonic	Kcnt2	.	stopgain	Kcnt2:NM_001081027:exon26:c.G3050A:p.W1017X	1qF
chr1	150648937	150648937	G	T	exonic	Hmcn1	.	nonsynonymous SNV	Hmcn1:NM_001024720:exon67:c.C10241A:p.A3414D	1qG1
chr1	153754205	153754205	C	T	exonic	Rnasel	.	stopgain	Rnasel:NM_011882:exon4:c.C466T:p.Q156X	1qG3
chr1	153892026	153892026	G	A	exonic	Teddm1a	.	nonsynonymous SNV	Teddm1a:NM_178244:exon1:c.G235A:p.G79R	1qG3
chr1	154204520	154204520	T	C	exonic	Zfp648	.	nonsynonymous SNV	Zfp648:NM_001204908:exon2:c.T424C:p.F142L	1qG3
chr1	154483161	154483161	G	A	exonic	Cacna1e	.	synonymous SNV	Cacna1e:NM_009782:exon14:c.C1800T:p.S600S	1qG3
chr1	157465789	157465789	G	T	exonic	Cryzl2	.	nonsynonymous SNV	Cryzl2:NM_001033284:exon6:c.G459T:p.L153F,Cryzl2:NM_001356418:exon6:c.G459T:p.L153F,Cryzl2:NM_001356419:exon6:c.G459T:p.L153F	1qH1
chr1	158472497	158472497	C	A	exonic	Astn1	.	nonsynonymous SNV	Astn1:NM_001205204:exon2:c.C406A:p.P136T,Astn1:NM_007495:exon2:c.C406A:p.P136T	1qH1
chr1	158684096	158684096	C	A	exonic	Astn1	.	stopgain	Astn1:NM_001205204:exon22:c.C3507A:p.Y1169X,Astn1:NM_007495:exon22:c.C3483A:p.Y1161X	1qH1
chr1	159895095	159895095	T	C	exonic	Tnr	.	nonsynonymous SNV	Tnr:NM_022312:exon16:c.T3109C:p.F1037L	1qH1
chr1	161000015	161000015	C	T	exonic	Serpinc1	.	nonsynonymous SNV	Serpinc1:NM_001379302:exon6:c.C820T:p.L274F,Serpinc1:NM_080844:exon7:c.C1183T:p.L395F	1qH2.1
chr1	163261877	163261877	A	C	exonic	Prrx1	.	nonsynonymous SNV	Prrx1:NM_001025570:exon2:c.T380G:p.L127R,Prrx1:NM_011127:exon2:c.T380G:p.L127R,Prrx1:NM_175686:exon2:c.T380G:p.L127R	1qH2.1
chr1	163386323	163386323	C	G	exonic	Gorab	.	nonsynonymous SNV	Gorab:NM_001313738:exon5:c.G572C:p.S191T,Gorab:NM_178883:exon5:c.G1037C:p.S346T	1qH2.1
chr1	163403550	163403550	C	A	exonic	Gorab	.	stopgain	Gorab:NM_178883:exon1:c.G34T:p.E12X	1qH2.1
chr1	164154385	164154385	A	C	exonic	F5	.	nonsynonymous SNV	F5:NM_007976:exon2:c.A218C:p.K73T	1qH2.2
chr1	165656011	165656011	C	A	exonic	Rcsd1	.	nonsynonymous SNV	Rcsd1:NM_001038846:exon5:c.G410T:p.R137I,Rcsd1:NM_178593:exon6:c.G500T:p.R167I	1qH2.3
chr1	166099283	166099283	A	G	exonic	Dusp27	.	nonsynonymous SNV	Dusp27:NM_001033344:exon6:c.T2759C:p.L920P,Dusp27:NM_001160049:exon6:c.T2759C:p.L920P	1qH2.3
chr1	167466494	167466494	C	A	exonic	Lrrc52	.	nonsynonymous SNV	Lrrc52:NM_001013382:exon1:c.G221T:p.G74V	1qH2.3
chr1	167844696	167844696	C	G	exonic	Lmx1a	.	synonymous SNV	Lmx1a:NM_033652:exon7:c.C882G:p.P294P	1qH2.3
chr1	171356715	171356715	G	C	exonic	Pfdn2	.	nonsynonymous SNV	Pfdn2:NM_001360824:exon3:c.G175C:p.D59H,Pfdn2:NM_001360825:exon3:c.G31C:p.D11H,Pfdn2:NM_011070:exon3:c.G175C:p.D59H	1qH3
chr1	171357963	171357963	A	G	exonic	Pfdn2	.	synonymous SNV	Pfdn2:NM_001360825:exon4:c.A258G:p.A86A,Pfdn2:NM_011070:exon4:c.A402G:p.A134A	1qH3
chr1	171358910	171358910	A	T	exonic	Klhdc9	.	synonymous SNV	Klhdc9:NM_001033039:exon4:c.T957A:p.T319T	1qH3
chr1	171695727	171695727	A	T	exonic	Cd48	.	nonsynonymous SNV	Cd48:NM_001360767:exon2:c.A137T:p.D46V,Cd48:NM_007649:exon2:c.A137T:p.D46V	1qH3
chr1	171767235	171767235	C	A	exonic	Slamf1	.	synonymous SNV	Slamf1:NM_001360898:exon1:c.C9A:p.P3P,Slamf1:NM_013730:exon1:c.C9A:p.P3P	1qH3
chr1	171799592	171799592	T	G	exonic	Slamf1	.	nonsynonymous SNV	Slamf1:NM_013730:exon7:c.T1001G:p.V334G	1qH3
chr1	172957324	172957324	T	A	exonic	Olfr16	.	nonsynonymous SNV	Olfr16:NM_008763:exon1:c.T528A:p.F176L	1qH3
chr1	173274671	173274671	G	A	exonic	Mptx2	.	synonymous SNV	Mptx2:NM_001205011:exon2:c.C450T:p.I150I	1qH3
chr1	173637407	173637407	A	C	exonic	Ifi209	.	nonsynonymous SNV	Ifi209:NM_175026:exon2:c.A102C:p.K34N	1qH3
chr1	173641146	173641146	A	G	exonic	Ifi209	.	nonsynonymous SNV	Ifi209:NM_175026:exon4:c.A541G:p.K181E	1qH3
chr1	173677774	173677774	A	C	exonic	Ifi208	.	nonsynonymous SNV	Ifi208:NM_001162938:exon2:c.A89C:p.K30T,Ifi208:NM_001379481:exon2:c.A89C:p.K30T	1qH3
chr1	173928581	173928581	A	T	exonic	Ifi203	.	nonsynonymous SNV	Ifi203:NM_001302649:exon7:c.T1635A:p.N545K	1qH3
chr1	173977280	173977280	T	C	exonic	Ifi202b	.	synonymous SNV	Ifi202b:NM_008327:exon2:c.A105G:p.Q35Q,Ifi202b:NM_011940:exon2:c.A105G:p.Q35Q	1qH3
chr1	174069949	174069949	C	T	exonic	Olfr430	.	nonsynonymous SNV	Olfr430:NM_146718:exon1:c.C650T:p.S217F	1qH3
chr1	174117315	174117315	C	T	exonic	Olfr231	.	nonsynonymous SNV	Olfr231:NM_001005520:exon1:c.G700A:p.A234T	1qH3
chr1	174230712	174230712	T	G	exonic	Spta1	.	synonymous SNV	Spta1:NM_011465:exon41:c.T5745G:p.A1915A	1qH3
chr1	174369744	174369744	G	A	exonic	Olfr417	.	nonsynonymous SNV	Olfr417:NM_207137:exon1:c.G826A:p.V276I	1qH3
chr1	174502102	174502102	C	T	exonic	Fmn2	.	synonymous SNV	Fmn2:NM_019445:exon1:c.C57T:p.G19G	1qH3
chr1	175084020	175084020	T	C	exonic	Rgs7	.	nonsynonymous SNV	Rgs7:NM_001357129:exon12:c.A875G:p.E292G,Rgs7:NM_001199003:exon14:c.A1034G:p.E345G,Rgs7:NM_001347195:exon14:c.A1034G:p.E345G,Rgs7:NM_011880:exon14:c.A1034G:p.E345G	1qH3
chr1	175705985	175705985	A	T	exonic	Wdr64	.	nonsynonymous SNV	Wdr64:NM_029453:exon2:c.A186T:p.Q62H	1qH3
chr1	175920802	175920802	C	G	exonic	Becn2	.	nonsynonymous SNV	Becn2:NM_001290692:exon1:c.C433G:p.L145V	1qH4
chr1	178874142	178874142	C	T	exonic	Kif26b	.	synonymous SNV	Kif26b:NM_001161665:exon9:c.C2085T:p.S695S	1qH4
chr1	179712879	179712879	C	A	exonic	Kif28	.	synonymous SNV	Kif28:NM_001370897:exon10:c.G1245T:p.L415L	1qH4
chr1	180897715	180897715	A	T	exonic	Lefty2	.	nonsynonymous SNV	Lefty2:NM_177099:exon4:c.A1009T:p.R337W	1qH4
chr1	181666015	181666015	G	T	exonic	Dnah14	.	unknown	UNKNOWN	1qH4
chr1	183404460	183404460	G	T	exonic	Taf1a	.	unknown	UNKNOWN	1qH5
chr1	184033317	184033317	G	T	exonic	1700056E22Rik	.	nonsynonymous SNV	1700056E22Rik:NM_028516:exon1:c.C544A:p.P182T	1qH5
chr1	186969564	186969564	A	G	exonic	D1Pas1	.	synonymous SNV	D1Pas1:NM_033077:exon1:c.A1689G:p.K563K	1qH5
chr1	188578516	188578516	C	T	exonic	Ush2a	.	synonymous SNV	Ush2a:NM_021408:exon31:c.C6288T:p.Y2096Y	1qH6
chr1	188947004	188947004	A	C	exonic	Ush2a	.	nonsynonymous SNV	Ush2a:NM_021408:exon65:c.A14408C:p.N4803T	1qH6
chr1	189652931	189652931	A	C	exonic	Cenpf	.	nonsynonymous SNV	Cenpf:NM_001081363:exon13:c.T7151G:p.L2384R	1qH6
chr1	190161999	190161999	G	C	exonic	Prox1	.	nonsynonymous SNV	Prox1:NM_001360827:exon2:c.C248G:p.A83G,Prox1:NM_008937:exon2:c.C248G:p.A83G	1qH6
chr1	190800337	190800337	G	C	exonic	Rps6kc1	.	synonymous SNV	Rps6kc1:NM_178775:exon11:c.C1467G:p.G489G	1qH6
chr1	190937554	190937554	G	A	exonic	Angel2	.	nonsynonymous SNV	Angel2:NM_001357131:exon3:c.G430A:p.D144N,Angel2:NM_001357133:exon3:c.G430A:p.D144N,Angel2:NM_021421:exon3:c.G496A:p.D166N,Angel2:NM_001199020:exon4:c.G430A:p.D144N	1qH6
chr1	192847031	192847031	G	T	exonic	Sertad4	.	nonsynonymous SNV	Sertad4:NM_001177794:exon4:c.C476A:p.T159N,Sertad4:NM_198247:exon4:c.C476A:p.T159N	1qH6
chr1	194644441	194644441	A	C	exonic	Plxna2	.	nonsynonymous SNV	Plxna2:NM_008882:exon2:c.A682C:p.I228L	1qH6
chr1	194764539	194764539	A	G	exonic	Plxna2	.	nonsynonymous SNV	Plxna2:NM_008882:exon11:c.A2356G:p.N786D	1qH6
chr10	4007844	4007844	T	G	exonic	Mthfd1l	.	nonsynonymous SNV	Mthfd1l:NM_001170785:exon8:c.T880G:p.F294V,Mthfd1l:NM_001170786:exon8:c.T880G:p.F294V,Mthfd1l:NM_172308:exon8:c.T880G:p.F294V	10qA1
chr10	6919807	6919807	A	G	exonic	Ipcef1	.	synonymous SNV	Ipcef1:NM_001033391:exon7:c.T592C:p.L198L,Ipcef1:NM_001170800:exon7:c.T733C:p.L245L,Ipcef1:NM_001170801:exon7:c.T745C:p.L249L,Ipcef1:NM_001170802:exon7:c.T733C:p.L245L,Ipcef1:NM_001347225:exon7:c.T745C:p.L249L	10qA1
chr10	7920266	7920266	A	T	exonic	Tab2	.	nonsynonymous SNV	Tab2:NM_001359534:exon3:c.T451A:p.S151T,Tab2:NM_138667:exon3:c.T451A:p.S151T	10qA1
chr10	14718124	14718124	A	C	exonic	Gje1	.	nonsynonymous SNV	Gje1:NM_029722:exon1:c.T25G:p.F9V	10qA2
chr10	22181951	22181951	A	C	exonic	Raet1c;Raet1e	.	nonsynonymous SNV	Raet1c:NM_009018:exon6:c.A613C:p.T205P,Raet1e:NM_198193:exon6:c.A616C:p.T206P,Raet1e:NM_001359809:exon7:c.A616C:p.T206P,Raet1e:NM_001359808:exon8:c.A616C:p.T206P	10qA3
chr10	22665246	22665246	T	G	exonic	Slc2a12	.	synonymous SNV	Slc2a12:NM_178934:exon2:c.T999G:p.V333V	10qA3
chr10	23113988	23113988	T	C	exonic	Eya4	.	nonsynonymous SNV	Eya4:NM_001347372:exon16:c.A1469G:p.Q490R,Eya4:NM_010167:exon16:c.A1469G:p.Q490R	10qA3
chr10	24108965	24108965	G	C	exonic	Taar9	.	nonsynonymous SNV	Taar9:NM_001010831:exon1:c.C570G:p.C190W	10qA4
chr10	24891208	24891208	C	T	exonic	Med23	.	synonymous SNV	Med23:NM_027347:exon12:c.C1176T:p.L392L,Med23:NM_001166416:exon13:c.C1194T:p.L398L	10qA4
chr10	26850004	26850004	A	T	exonic	Arhgap18	.	nonsynonymous SNV	Arhgap18:NM_176837:exon3:c.A440T:p.Q147L	10qA4
chr10	27324661	27324661	T	G	exonic	Lama2	.	nonsynonymous SNV	Lama2:NM_008481:exon12:c.A1690C:p.S564R	10qA4
chr10	39824318	39824318	C	A	exonic	Rev3l	.	nonsynonymous SNV	Rev3l:NM_011264:exon13:c.C4810A:p.Q1604K	10qB1
chr10	39970407	39970407	C	A	exonic	Mfsd4b5	.	synonymous SNV	Mfsd4b5:NM_001113385:exon4:c.G1176T:p.G392G	10qB1
chr10	40639701	40639701	C	A	exonic	Ddo	.	synonymous SNV	Ddo:NM_001316719:exon5:c.C492A:p.P164P	10qB1
chr10	41253731	41253731	A	C	exonic	Fig4	.	nonsynonymous SNV	Fig4:NM_133999:exon14:c.T1492G:p.F498V	10qB1
chr10	41680262	41680262	A	G	exonic	Ccdc162	.	synonymous SNV	Ccdc162:NM_001358562:exon7:c.T723C:p.T241T	10qB2
chr10	43997311	43997311	C	T	exonic	Crybg1	.	nonsynonymous SNV	Crybg1:NM_172393:exon2:c.G2678A:p.R893H,Crybg1:NM_001368306:exon3:c.G3503A:p.R1168H,Crybg1:NM_001368305:exon4:c.G3800A:p.R1267H	10qB2
chr10	44441925	44441925	G	A	exonic	Prdm1	.	nonsynonymous SNV	Prdm1:NM_007548:exon5:c.C901T:p.R301W	10qB2
chr10	52115934	52115934	T	G	exonic	Ros1	.	synonymous SNV	Ros1:NM_011282:exon27:c.A4255C:p.R1419R	10qB3
chr10	57496168	57496168	A	T	exonic	Hsf2	.	nonsynonymous SNV	Hsf2:NM_008297:exon3:c.A216T:p.K72N	10qB4
chr10	58231157	58231157	G	T	exonic	Dux	.	nonsynonymous SNV	Dux:NM_001081954:exon1:c.C1519A:p.Q507K	10qB4
chr10	58231168	58231168	C	A	exonic	Dux	.	nonsynonymous SNV	Dux:NM_001081954:exon1:c.G1508T:p.C503F	10qB4
chr10	58231344	58231344	C	G	exonic	Dux	.	nonsynonymous SNV	Dux:NM_001081954:exon1:c.G1332C:p.L444F	10qB4
chr10	58231387	58231387	T	G	exonic	Dux	.	nonsynonymous SNV	Dux:NM_001081954:exon1:c.A1289C:p.Q430P	10qB4
chr10	58231676	58231676	A	C	exonic	Dux	.	nonsynonymous SNV	Dux:NM_001081954:exon1:c.T1000G:p.S334A	10qB4
chr10	58231704	58231704	A	C	exonic	Dux	.	nonsynonymous SNV	Dux:NM_001081954:exon1:c.T972G:p.F324L	10qB4
chr10	58231705	58231705	A	T	exonic	Dux	.	nonsynonymous SNV	Dux:NM_001081954:exon1:c.T971A:p.F324Y	10qB4
chr10	58231706	58231706	A	G	exonic	Dux	.	nonsynonymous SNV	Dux:NM_001081954:exon1:c.T970C:p.F324L	10qB4
chr10	58231743	58231743	T	A	exonic	Dux	.	synonymous SNV	Dux:NM_001081954:exon1:c.A933T:p.S311S	10qB4
chr10	58231924	58231924	T	C	exonic	Dux	.	nonsynonymous SNV	Dux:NM_001081954:exon1:c.A752G:p.Q251R	10qB4
chr10	58231988	58231988	T	C	exonic	Dux	.	nonsynonymous SNV	Dux:NM_001081954:exon1:c.A688G:p.R230G	10qB4
chr10	58235911	58235911	T	G	exonic	Gm4981	.	nonsynonymous SNV	Gm4981:NM_001034869:exon1:c.A480C:p.E160D	10qB4
chr10	58492893	58492893	A	T	exonic	Ranbp2	.	nonsynonymous SNV	Ranbp2:NM_011240:exon28:c.A8613T:p.Q2871H	10qB4
chr10	59890054	59890054	C	A	exonic	Dnajb12	.	nonsynonymous SNV	Dnajb12:NM_001374756:exon2:c.C160A:p.P54T,Dnajb12:NM_001376970:exon2:c.C160A:p.P54T,Dnajb12:NM_019965:exon2:c.C160A:p.P54T	10qB4
chr10	60413644	60413644	T	C	exonic	Cdh23	.	nonsynonymous SNV	Cdh23:NM_001252635:exon23:c.A2479G:p.T827A	10qB4
chr10	61106361	61106361	G	A	exonic	Sgpl1	.	synonymous SNV	Sgpl1:NM_001316673:exon9:c.C714T:p.P238P,Sgpl1:NM_001316674:exon9:c.C714T:p.P238P,Sgpl1:NM_009163:exon9:c.C714T:p.P238P	10qB4
chr10	61218445	61218445	A	G	exonic	Adamts14	.	nonsynonymous SNV	Adamts14:NM_001081127:exon12:c.T1798C:p.F600L	10qB4
chr10	63581978	63581978	C	T	exonic	Ctnna3	.	nonsynonymous SNV	Ctnna3:NM_001164376:exon5:c.C494T:p.S165F,Ctnna3:NM_177612:exon5:c.C494T:p.S165F	10qB4
chr10	67238174	67238174	T	C	exonic	Jmjd1c	.	nonsynonymous SNV	Jmjd1c:NM_001242396:exon13:c.T5144C:p.L1715P,Jmjd1c:NM_207221:exon14:c.T5684C:p.L1895P	10qB5.1
chr10	67889981	67889981	T	C	exonic	Zfp365	.	nonsynonymous SNV	Zfp365:NM_178679:exon4:c.A937G:p.I313V	10qB5.1
chr10	68243029	68243029	G	A	exonic	Arid5b	.	synonymous SNV	Arid5b:NM_023598:exon3:c.C477T:p.D159D	10qB5.2
chr10	74626783	74626783	G	C	exonic	Pcdh15	.	synonymous SNV	Pcdh15:NM_001142738:exon30:c.G4188C:p.P1396P,Pcdh15:NM_001142740:exon31:c.G4299C:p.P1433P,Pcdh15:NM_001142736:exon32:c.G4308C:p.P1436P,Pcdh15:NM_001142743:exon32:c.G4308C:p.P1436P	10qB5.3
chr10	74626789	74626789	G	C	exonic	Pcdh15	.	synonymous SNV	Pcdh15:NM_001142738:exon30:c.G4194C:p.P1398P,Pcdh15:NM_001142740:exon31:c.G4305C:p.P1435P,Pcdh15:NM_001142736:exon32:c.G4314C:p.P1438P,Pcdh15:NM_001142743:exon32:c.G4314C:p.P1438P	10qB5.3
chr10	74626792	74626792	A	C	exonic	Pcdh15	.	synonymous SNV	Pcdh15:NM_001142738:exon30:c.A4197C:p.P1399P,Pcdh15:NM_001142740:exon31:c.A4308C:p.P1436P,Pcdh15:NM_001142736:exon32:c.A4317C:p.P1439P,Pcdh15:NM_001142743:exon32:c.A4317C:p.P1439P	10qB5.3
chr10	75333351	75333351	T	A	exonic	Adora2a	.	synonymous SNV	Adora2a:NM_001331095:exon3:c.T648A:p.T216T,Adora2a:NM_001331096:exon3:c.T648A:p.T216T,Adora2a:NM_009630:exon3:c.T648A:p.T216T	10qC1
chr10	75608759	75608759	T	G	exonic	Ggt5	.	nonsynonymous SNV	Ggt5:NM_001359425:exon3:c.T94G:p.F32V,Ggt5:NM_011820:exon7:c.T910G:p.F304V	10qC1
chr10	75911617	75911617	G	A	exonic	Smarcb1	.	synonymous SNV	Smarcb1:NM_001161853:exon4:c.C375T:p.T125T,Smarcb1:NM_011418:exon4:c.C402T:p.T134T	10qC1
chr10	76285628	76285628	T	C	exonic	Dip2a	.	nonsynonymous SNV	Dip2a:NM_001081419:exon21:c.A2393G:p.K798R	10qC1
chr10	76709559	76709559	C	G	exonic	Col6a1	.	stoploss	Col6a1:NM_009933:exon35:c.G3078C:p.X1026Y	10qC1
chr10	76763323	76763323	C	A	exonic	Pcbp3	.	nonsynonymous SNV	Pcbp3:NM_001347216:exon15:c.G975T:p.Q325H,Pcbp3:NM_021568:exon15:c.G978T:p.Q326H	10qC1
chr10	77059925	77059925	G	T	exonic	Col18a1	.	synonymous SNV	Col18a1:NM_001109991:exon33:c.C3393A:p.P1131P,Col18a1:NM_009929:exon34:c.C2757A:p.P919P	10qC1
chr10	77262450	77262450	C	A	exonic	Pofut2	.	synonymous SNV	Pofut2:NM_030262:exon3:c.C396A:p.P132P	10qC1
chr10	77490031	77490031	C	A	exonic	Fam207a	.	nonsynonymous SNV	Fam207a:NM_133998:exon5:c.G503T:p.S168I	10qC1
chr10	77836324	77836324	G	A	exonic	Krtap10-10	.	nonsynonymous SNV	Krtap10-10:NM_001024709:exon1:c.G326A:p.C109Y	10qC1
chr10	79356622	79356622	T	G	exonic	Vmn2r82	.	nonsynonymous SNV	Vmn2r82:NM_001101572:exon1:c.T32G:p.F11C	10qC1
chr10	79396067	79396067	G	T	exonic	Vmn2r82	.	synonymous SNV	Vmn2r82:NM_001101572:exon6:c.G1899T:p.L633L	10qC1
chr10	79664942	79664942	C	A	exonic	Madcam1	.	nonsynonymous SNV	Madcam1:NM_001358785:exon2:c.C92A:p.S31Y,Madcam1:NM_013591:exon2:c.C92A:p.S31Y	10qC1
chr10	79819162	79819162	G	C	exonic	Palm	.	synonymous SNV	Palm:NM_001161747:exon8:c.G621C:p.G207G,Palm:NM_023128:exon9:c.G753C:p.G251G	10qC1
chr10	80260811	80260811	C	T	exonic	Gamt	.	nonsynonymous SNV	Gamt:NM_001347119:exon1:c.G91A:p.D31N,Gamt:NM_010255:exon1:c.G91A:p.D31N	10qC1
chr10	80382557	80382557	C	T	exonic	Mex3d	.	synonymous SNV	Mex3d:NM_198615:exon2:c.G825A:p.E275E	10qC1
chr10	80719237	80719237	T	C	exonic	Ap3d1	.	nonsynonymous SNV	Ap3d1:NM_007460:exon13:c.A1253G:p.Y418C	10qC1
chr10	80826829	80826829	C	G	exonic	Oaz1	.	unknown	UNKNOWN	10qC1
chr10	81148405	81148405	G	A	exonic	Zbtb7a	.	synonymous SNV	Zbtb7a:NM_010731:exon3:c.G1680A:p.V560V	10qC1
chr10	81181889	81181889	G	C	exonic	Eef2	.	nonsynonymous SNV	Eef2:NM_007907:exon14:c.G2384C:p.G795A	10qC1
chr10	81333215	81333215	G	C	exonic	Tbxa2r	.	nonsynonymous SNV	Tbxa2r:NM_001277265:exon2:c.G737C:p.G246A,Tbxa2r:NM_001358512:exon3:c.G737C:p.G246A,Tbxa2r:NM_009325:exon3:c.G737C:p.G246A	10qC1
chr10	81346573	81346573	C	G	exonic	Hmg20b	.	nonsynonymous SNV	Hmg20b:NM_010440:exon8:c.G928C:p.A310P,Hmg20b:NM_001163165:exon9:c.G928C:p.A310P,Hmg20b:NM_001163166:exon9:c.G928C:p.A310P	10qC1
chr10	81466949	81466949	C	T	exonic	Celf5	.	nonsynonymous SNV	Celf5:NM_001379189:exon7:c.G691A:p.A231T,Celf5:NM_001379191:exon7:c.G772A:p.A258T,Celf5:NM_001379192:exon7:c.G775A:p.A259T,Celf5:NM_001379193:exon7:c.G772A:p.A258T,Celf5:NM_001379194:exon7:c.G688A:p.A230T,Celf5:NM_001379195:exon7:c.G691A:p.A231T,Celf5:NM_001311124:exon8:c.G898A:p.A300T,Celf5:NM_001311126:exon8:c.G670A:p.A224T,Celf5:NM_001311127:exon8:c.G673A:p.A225T,Celf5:NM_001374703:exon8:c.G90…	10qC1
chr10	81638656	81638656	G	A	exonic	Ankrd24	.	nonsynonymous SNV	Ankrd24:NM_001374016:exon9:c.G743A:p.G248D,Ankrd24:NM_027480:exon9:c.G653A:p.G218D	10qC1
chr10	84840215	84840215	T	C	exonic	Rfx4	.	synonymous SNV	Rfx4:NM_027689:exon2:c.T294C:p.S98S,Rfx4:NM_001024918:exon6:c.T576C:p.S192S	10qC1
chr10	85387857	85387857	C	T	exonic	Btbd11	.	nonsynonymous SNV	Btbd11:NM_028709:exon1:c.C529T:p.H177Y	10qC1
chr10	85993411	85993411	G	A	exonic	Bpifc	.	synonymous SNV	Bpifc:NM_177772:exon4:c.C291T:p.F97F	10qC1
chr10	86887872	86887872	A	G	exonic	Stab2	.	synonymous SNV	Stab2:NM_138673:exon42:c.T4458C:p.N1486N	10qC1
chr10	87571291	87571291	C	T	exonic	Pah	.	nonsynonymous SNV	Pah:NM_008777:exon8:c.C908T:p.S303F	10qC1
chr10	100605639	100605639	A	T	exonic	1700017N19Rik	.	nonsynonymous SNV	1700017N19Rik:NM_001081246:exon7:c.A509T:p.K170M	10qD1
chr10	103202446	103202446	T	A	exonic	Lrriq1	.	nonsynonymous SNV	Lrriq1:NM_001163559:exon9:c.A2495T:p.N832I	10qD1
chr10	107699672	107699672	C	T	exonic	Ptprq	.	nonsynonymous SNV	Ptprq:NM_001081432:exon9:c.G1231A:p.A411T,Ptprq:NM_001370987:exon9:c.G1231A:p.A411T	10qD1
chr10	117024170	117024170	C	T	exonic	Best3	.	nonsynonymous SNV	Best3:NM_001007583:exon10:c.C1334T:p.S445L	10qD2
chr10	117356041	117356041	T	C	exonic	Cpsf6	.	nonsynonymous SNV	Cpsf6:NM_001013391:exon9:c.A1553G:p.D518G,Cpsf6:NM_001310609:exon9:c.A1556G:p.D519G	10qD2
chr10	118158362	118158362	A	C	exonic	Mdm1	.	nonsynonymous SNV	Mdm1:NM_001162905:exon9:c.A1140C:p.K380N,Mdm1:NM_010785:exon9:c.A1245C:p.K415N,Mdm1:NM_148922:exon9:c.A1245C:p.K415N,Mdm1:NM_001162904:exon10:c.A1275C:p.K425N	10qD2
chr10	121601323	121601323	A	C	exonic	Xpot	.	nonsynonymous SNV	Xpot:NM_001081056:exon20:c.T2489G:p.I830S,Xpot:NM_001359618:exon20:c.T2489G:p.I830S	10qD2
chr10	122449577	122449577	G	C	exonic	Avpr1a	.	nonsynonymous SNV	Avpr1a:NM_016847:exon1:c.G773C:p.S258T	10qD2
chr10	127088242	127088242	G	T	exonic	Agap2	.	nonsynonymous SNV	Agap2:NM_001033263:exon12:c.G2324T:p.S775I,Agap2:NM_001301014:exon12:c.G2324T:p.S775I	10qD3
chr10	127584379	127584379	G	A	exonic	Lrp1	.	nonsynonymous SNV	Lrp1:NM_008512:exon17:c.C2734T:p.R912C	10qD3
chr10	127788833	127788833	A	C	exonic	Rdh9	.	nonsynonymous SNV	Rdh9:NM_153133:exon2:c.A539C:p.K180T	10qD3
chr10	128461434	128461434	G	C	exonic	Smarcc2	.	nonsynonymous SNV	Smarcc2:NM_001114096:exon2:c.G194C:p.G65A,Smarcc2:NM_001114097:exon2:c.G194C:p.G65A,Smarcc2:NM_001372395:exon2:c.G194C:p.G65A,Smarcc2:NM_198160:exon2:c.G194C:p.G65A	10qD3
chr10	129133075	129133075	T	G	exonic	Olfr770	.	nonsynonymous SNV	Olfr770:NM_146863:exon1:c.A692C:p.K231T	10qD3
chr10	129647609	129647609	T	G	exonic	Olfr799	.	synonymous SNV	Olfr799:NM_146927:exon1:c.T480G:p.G160G	10qD3
chr10	129754627	129754627	G	T	exonic	Olfr807	.	synonymous SNV	Olfr807:NM_146929:exon1:c.C822A:p.L274L	10qD3
chr10	129755339	129755339	A	C	exonic	Olfr807	.	nonsynonymous SNV	Olfr807:NM_146929:exon1:c.T110G:p.I37S	10qD3
chr10	129791481	129791481	C	T	exonic	Olfr810	.	nonsynonymous SNV	Olfr810:NM_146550:exon1:c.G107A:p.S36N	10qD3
chr10	129902683	129902683	T	C	exonic	Olfr815	.	nonsynonymous SNV	Olfr815:NM_146670:exon1:c.A44G:p.E15G	10qD3
chr10	130472314	130472314	C	A	exonic	Vmn2r87	.	nonsynonymous SNV	Vmn2r87:NM_001103366:exon6:c.G2054T:p.R685M	10qD3
chr11	3133205	3133205	C	T	exonic	Sfi1	.	synonymous SNV	Sfi1:NM_001363224:exon26:c.G1788A:p.V596V,Sfi1:NM_001363222:exon27:c.G1863A:p.V621V,Sfi1:NM_001363223:exon27:c.G1863A:p.V621V,Sfi1:NM_030207:exon30:c.G3222A:p.V1074V	11qA1
chr11	3186080	3186080	G	A	exonic	Sfi1	.	nonsynonymous SNV	Sfi1:NM_030207:exon4:c.C251T:p.T84I	11qA1
chr11	3187266	3187266	C	T	exonic	Sfi1	.	synonymous SNV	Sfi1:NM_030207:exon3:c.G168A:p.R56R	11qA1
chr11	3187367	3187367	T	C	exonic	Sfi1	.	nonsynonymous SNV	Sfi1:NM_030207:exon3:c.A67G:p.T23A	11qA1
chr11	4646656	4646656	C	G	exonic	Ascc2	.	nonsynonymous SNV	Ascc2:NM_029291:exon3:c.C176G:p.A59G	11qA1
chr11	5796797	5796797	A	T	exonic	Dbnl	.	stopgain	Dbnl:NM_001146308:exon6:c.A526T:p.K176X,Dbnl:NM_001146309:exon6:c.A526T:p.K176X,Dbnl:NM_013810:exon6:c.A526T:p.K176X	11qA1
chr11	5871645	5871645	A	T	exonic	Aebp1	.	synonymous SNV	Aebp1:NM_001291857:exon21:c.A3186T:p.L1062L,Aebp1:NM_009636:exon21:c.A3183T:p.L1061L	11qA1
chr11	6355427	6355427	A	C	exonic	Ogdh	.	nonsynonymous SNV	Ogdh:NM_001252287:exon22:c.A2933C:p.D978A,Ogdh:NM_001252288:exon22:c.A2921C:p.D974A,Ogdh:NM_001361904:exon22:c.A2933C:p.D978A,Ogdh:NM_001361905:exon22:c.A2921C:p.D974A,Ogdh:NM_010956:exon22:c.A2933C:p.D978A,Ogdh:NM_001252282:exon23:c.A2978C:p.D993A,Ogdh:NM_001252283:exon23:c.A2966C:p.D989A,Ogdh:NM_001361902:exon23:c.A2966C:p.D989A,Ogdh:NM_001361903:exon23:c.A2966C:p.D989A	11qA1
chr11	7150019	7150019	G	C	exonic	Adcy1	.	nonsynonymous SNV	Adcy1:NM_009622:exon13:c.G2128C:p.A710P	11qA1
chr11	9294687	9294687	A	C	exonic	Abca13	.	nonsynonymous SNV	Abca13:NM_178259:exon17:c.A6549C:p.Q2183H	11qA1
chr11	11408568	11408568	C	A	exonic	Zpbp	.	nonsynonymous SNV	Zpbp:NM_001185153:exon5:c.G527T:p.R176L,Zpbp:NM_015785:exon5:c.G698T:p.R233L	11qA1
chr11	11459700	11459700	A	G	exonic	Zpbp	.	synonymous SNV	Zpbp:NM_001185153:exon2:c.T210C:p.P70P,Zpbp:NM_015785:exon2:c.T381C:p.P127P	11qA1
chr11	30819933	30819933	T	C	exonic	Psme4	.	synonymous SNV	Psme4:NM_134013:exon18:c.T2052C:p.T684T	11qA4
chr11	33680496	33680496	A	C	exonic	Kcnip1	.	nonsynonymous SNV	Kcnip1:NM_001363115:exon1:c.T115G:p.L39V	11qA4
chr11	34438300	34438300	G	A	exonic	Dock2	.	nonsynonymous SNV	Dock2:NM_033374:exon27:c.C2771T:p.T924M	11qA4
chr11	34692382	34692382	A	C	exonic	Dock2	.	nonsynonymous SNV	Dock2:NM_033374:exon18:c.T1703G:p.L568R	11qA4
chr11	34695212	34695212	C	A	exonic	Dock2	.	stopgain	Dock2:NM_033374:exon17:c.G1642T:p.E548X	11qA4
chr11	35883482	35883482	T	G	exonic	Wwc1	.	nonsynonymous SNV	Wwc1:NM_170779:exon9:c.A950C:p.N317T	11qA4
chr11	36139585	36139585	A	G	exonic	Tenm2	.	nonsynonymous SNV	Tenm2:NM_001290702:exon11:c.T2263C:p.C755R,Tenm2:NM_011856:exon12:c.T2383C:p.C795R	11qA4
chr11	36273267	36273267	C	T	exonic	Tenm2	.	nonsynonymous SNV	Tenm2:NM_001290702:exon5:c.G1150A:p.A384T,Tenm2:NM_011856:exon5:c.G1150A:p.A384T	11qA4
chr11	46407723	46407723	G	A	exonic	Fam71b	.	nonsynonymous SNV	Fam71b:NM_001013783:exon2:c.G1853A:p.R618K	11qB1.1
chr11	49494673	49494673	G	A	exonic	Olfr1385	.	nonsynonymous SNV	Olfr1385:NM_001011805:exon1:c.G139A:p.A47T	11qB1.2
chr11	49638276	49638276	C	T	exonic	Flt4	.	synonymous SNV	Flt4:NM_008029:exon23:c.C3111T:p.D1037D	11qB1.2
chr11	51995384	51995384	G	A	exonic	Ube2b	.	synonymous SNV	Ube2b:NM_001362686:exon3:c.C141T:p.P47P,Ube2b:NM_009458:exon3:c.C141T:p.P47P,Ube2b:NM_001362685:exon4:c.C141T:p.P47P	11qB1.3
chr11	52032396	52032396	C	T	exonic	Cdkl3	.	nonsynonymous SNV	Cdkl3:NM_001166653:exon11:c.C1499T:p.T500I,Cdkl3:NM_001166654:exon11:c.C1499T:p.T500I,Cdkl3:NM_001166656:exon11:c.C1499T:p.T500I,Cdkl3:NM_153785:exon11:c.C1499T:p.T500I	11qB1.3
chr11	53979573	53979573	T	C	exonic	Slc22a21	.	synonymous SNV	Slc22a21:NM_019723:exon1:c.A285G:p.L95L	11qB1.3
chr11	58314343	58314343	C	T	exonic	Zfp692	.	synonymous SNV	Zfp692:NM_001040686:exon12:c.C1417T:p.L473L,Zfp692:NM_182996:exon12:c.C1417T:p.L473L	11qB1.3
chr11	58386730	58386730	A	C	exonic	Lypd8	.	nonsynonymous SNV	Lypd8:NM_001330197:exon5:c.A337C:p.T113P,Lypd8:NM_027339:exon5:c.A337C:p.T113P,Lypd8:NM_001083884:exon6:c.A337C:p.T113P	11qB1.3
chr11	58422880	58422880	G	A	exonic	1810065E05Rik	.	synonymous SNV	1810065E05Rik:NM_027239:exon4:c.G333A:p.T111T	11qB1.3
chr11	58702149	58702149	G	A	exonic	Olfr319	.	stopgain	Olfr319:NM_146500:exon1:c.G447A:p.W149X	11qB1.3
chr11	59067293	59067293	T	G	exonic	Obscn	.	nonsynonymous SNV	Obscn:NM_001171512:exon39:c.A10580C:p.K3527T,Obscn:NM_199152:exon41:c.A11207C:p.K3736T	11qB1.3
chr11	59551860	59551860	G	C	exonic	Nlrp3	.	nonsynonymous SNV	Nlrp3:NM_145827:exon5:c.G2237C:p.S746T,Nlrp3:NM_001359638:exon6:c.G2237C:p.S746T	11qB1.3
chr11	60801574	60801574	A	C	exonic	Shmt1	.	nonsynonymous SNV	Shmt1:NM_009171:exon5:c.T355G:p.F119V	11qB2
chr11	61146887	61146887	G	T	exonic	Tnfrsf13b	.	synonymous SNV	Tnfrsf13b:NM_021349:exon4:c.G393T:p.G131G	11qB2
chr11	62378552	62378552	T	G	exonic	Ncor1	.	nonsynonymous SNV	Ncor1:NM_001252313:exon17:c.A2018C:p.H673P,Ncor1:NM_011308:exon17:c.A2018C:p.H673P	11qB2
chr11	63073481	63073481	T	C	exonic	Tekt3	.	synonymous SNV	Tekt3:NM_027660:exon3:c.T636C:p.H212H	11qB3
chr11	65690736	65690736	C	T	exonic	Map2k4	.	synonymous SNV	Map2k4:NM_001316369:exon10:c.G717A:p.L239L,Map2k4:NM_001362740:exon10:c.G801A:p.L267L,Map2k4:NM_001316368:exon11:c.G717A:p.L239L,Map2k4:NM_001362739:exon11:c.G801A:p.L267L,Map2k4:NM_009157:exon11:c.G1149A:p.L383L,Map2k4:NM_001316367:exon12:c.G1182A:p.L394L	11qB3
chr11	67056573	67056573	G	A	exonic	Sco1	.	synonymous SNV	Sco1:NM_001040026:exon4:c.G570A:p.R190R	11qB3
chr11	67191449	67191449	C	T	exonic	Myh2	.	nonsynonymous SNV	Myh2:NM_001039545:exon29:c.C3976T:p.L1326F	11qB3
chr11	67298592	67298592	A	C	exonic	Myh8	.	nonsynonymous SNV	Myh8:NM_177369:exon27:c.A3593C:p.K1198T	11qB3
chr11	68490881	68490881	A	G	exonic	Pik3r5	.	synonymous SNV	Pik3r5:NM_177320:exon8:c.A750G:p.R250R	11qB3
chr11	68768315	68768315	G	A	exonic	Myh10	.	stopgain	Myh10:NM_175260:exon13:c.G1518A:p.W506X	11qB3
chr11	68991152	68991152	A	C	exonic	Pfas	.	synonymous SNV	Pfas:NM_001159519:exon22:c.T2706G:p.R902R	11qB3
chr11	69000325	69000325	G	T	exonic	Pfas	.	nonsynonymous SNV	Pfas:NM_001159519:exon8:c.C866A:p.S289Y	11qB3
chr11	69104776	69104776	C	T	exonic	Per1	.	synonymous SNV	Per1:NM_001159367:exon17:c.C2181T:p.T727T,Per1:NM_011065:exon17:c.C2181T:p.T727T	11qB3
chr11	69224739	69224739	G	C	exonic	Gucy2e	.	nonsynonymous SNV	Gucy2e:NM_008192:exon14:c.C2730G:p.D910E	11qB3
chr11	69430793	69430793	A	C	exonic	Dnah2	.	nonsynonymous SNV	Dnah2:NM_001081330:exon75:c.T11540G:p.L3847R	11qB3
chr11	69578498	69578498	G	A	exonic	Wrap53	.	nonsynonymous SNV	Wrap53:NM_144824:exon2:c.C431T:p.S144F,Wrap53:NM_001364769:exon3:c.C431T:p.S144F	11qB3
chr11	69588379	69588379	A	G	exonic	Trp53	.	nonsynonymous SNV	Trp53:NM_001127233:exon5:c.A382G:p.N128D,Trp53:NM_011640:exon5:c.A382G:p.N128D	11qB3
chr11	70031130	70031130	G	A	exonic	Dlg4	.	nonsynonymous SNV	Dlg4:NM_001370674:exon5:c.G305A:p.R102Q,Dlg4:NM_001109752:exon6:c.G368A:p.R123Q,Dlg4:NM_001370671:exon6:c.G392A:p.R131Q,Dlg4:NM_001370672:exon6:c.G197A:p.R66Q,Dlg4:NM_007864:exon6:c.G377A:p.R126Q,Dlg4:NM_001370675:exon8:c.G497A:p.R166Q	11qB3
chr11	70396890	70396890	A	G	exonic	Pelp1	.	nonsynonymous SNV	Pelp1:NM_029231:exon11:c.T1205C:p.L402P	11qB3
chr11	70455978	70455978	C	T	exonic	Cxcl16	.	nonsynonymous SNV	Cxcl16:NM_023158:exon4:c.G377A:p.G126E	11qB3
chr11	70513817	70513817	T	A	exonic	Vmo1	.	nonsynonymous SNV	Vmo1:NM_001013607:exon3:c.A357T:p.L119F	11qB3
chr11	70555359	70555359	C	T	exonic	Pld2	.	synonymous SNV	Pld2:NM_001361935:exon20:c.C2052T:p.I684I,Pld2:NM_001302475:exon21:c.C2184T:p.I728I,Pld2:NM_008876:exon21:c.C2151T:p.I717I	11qB3
chr11	73047910	73047910	T	C	exonic	Ncbp3	.	nonsynonymous SNV	Ncbp3:NM_025818:exon1:c.T11C:p.V4A	11qB4
chr11	73118629	73118629	T	G	exonic	Itgae	.	synonymous SNV	Itgae:NM_001361245:exon14:c.T1635G:p.P545P,Itgae:NM_008399:exon14:c.T1638G:p.P546P	11qB4
chr11	73425105	73425105	T	C	exonic	Olfr378	.	nonsynonymous SNV	Olfr378:NM_147024:exon2:c.A877G:p.S293G	11qB4
chr11	73711246	73711246	T	C	exonic	Zfp735	.	synonymous SNV	Zfp735:NM_001126489:exon4:c.T1015C:p.L339L	11qB4
chr11	73941138	73941138	G	A	exonic	Olfr23	.	nonsynonymous SNV	Olfr23:NM_010970:exon1:c.G891A:p.M297I	11qB4
chr11	74288835	74288835	T	C	exonic	Olfr59	.	nonsynonymous SNV	Olfr59:NM_001362665:exon2:c.T188C:p.L63P,Olfr59:NM_011002:exon2:c.T188C:p.L63P	11qB5
chr11	74334692	74334692	A	T	exonic	Olfr410	.	nonsynonymous SNV	Olfr410:NM_146707:exon1:c.T538A:p.F180I	11qB5
chr11	75525490	75525490	C	T	exonic	Scarf1	.	nonsynonymous SNV	Scarf1:NM_001004157:exon11:c.C1757T:p.A586V	11qB5
chr11	76801746	76801746	C	A	exonic	Cpd	.	nonsynonymous SNV	Cpd:NM_007754:exon10:c.G2264T:p.C755F	11qB5
chr11	77973197	77973197	T	G	exonic	Sez6	.	nonsynonymous SNV	Sez6:NM_001291225:exon7:c.T1504G:p.F502V,Sez6:NM_021286:exon7:c.T1504G:p.F502V	11qB5
chr11	79044879	79044879	G	C	exonic	Ksr1	.	unknown	UNKNOWN	11qB5
chr11	79502320	79502320	G	C	exonic	Omg	.	nonsynonymous SNV	Omg:NM_019409:exon2:c.C711G:p.N237K	11qB5
chr11	80674898	80674898	T	G	exonic	Myo1d	.	nonsynonymous SNV	Myo1d:NM_177390:exon9:c.A1100C:p.N367T	11qB5
chr11	83440506	83440506	A	G	exonic	1700020L24Rik	.	nonsynonymous SNV	1700020L24Rik:NM_025492:exon2:c.A233G:p.Q78R	11qC
chr11	84009478	84009478	G	T	exonic	Synrg	.	nonsynonymous SNV	Synrg:NM_194341:exon13:c.G2275T:p.D759Y	11qC
chr11	84223173	84223173	A	C	exonic	Acaca	.	synonymous SNV	Acaca:NM_133360:exon4:c.A528C:p.P176P	11qC
chr11	86061894	86061894	T	G	exonic	Brip1	.	synonymous SNV	Brip1:NM_178309:exon20:c.A3060C:p.V1020V	11qC
chr11	86549470	86549470	G	A	exonic	Tubd1	.	nonsynonymous SNV	Tubd1:NM_001199045:exon3:c.G319A:p.G107S,Tubd1:NM_001199046:exon3:c.G319A:p.G107S,Tubd1:NM_001199047:exon3:c.G319A:p.G107S,Tubd1:NM_019756:exon3:c.G319A:p.G107S	11qC
chr11	87101435	87101435	G	T	exonic	Prr11	.	nonsynonymous SNV	Prr11:NM_175563:exon5:c.C613A:p.P205T	11qC
chr11	87731517	87731517	C	G	exonic	Rnf43	.	nonsynonymous SNV	Rnf43:NM_001363437:exon8:c.C1062G:p.N354K,Rnf43:NM_172448:exon9:c.C1443G:p.N481K	11qC
chr11	87778531	87778531	C	T	exonic	Tspoap1	.	synonymous SNV	Tspoap1:NM_172449:exon22:c.C4629T:p.L1543L	11qC
chr11	87795245	87795245	T	G	exonic	Mpo	.	nonsynonymous SNV	Mpo:NM_010824:exon4:c.T220G:p.F74V	11qC
chr11	94363796	94363796	T	C	exonic	Abcc3	.	synonymous SNV	Abcc3:NM_001363187:exon16:c.A1962G:p.A654A,Abcc3:NM_001363189:exon16:c.A1962G:p.A654A,Abcc3:NM_029600:exon16:c.A1962G:p.A654A	11qD
chr11	94433710	94433710	C	G	exonic	Cacna1g	.	nonsynonymous SNV	Cacna1g:NM_001112813:exon16:c.G3615C:p.E1205D,Cacna1g:NM_001177888:exon16:c.G3615C:p.E1205D,Cacna1g:NM_001177890:exon16:c.G3564C:p.E1188D,Cacna1g:NM_009783:exon17:c.G3684C:p.E1228D	11qD
chr11	94505784	94505784	A	C	exonic	Mycbpap	.	nonsynonymous SNV	Mycbpap:NM_170671:exon14:c.T1783G:p.L595V	11qD
chr11	95371524	95371524	C	G	exonic	Fam117a	.	nonsynonymous SNV	Fam117a:NM_172543:exon3:c.C453G:p.H151Q	11qD
chr11	98845895	98845895	C	G	exonic	Rapgefl1	.	nonsynonymous SNV	Rapgefl1:NM_001080925:exon5:c.C854G:p.P285R	11qD
chr11	99386639	99386639	C	T	exonic	Krt10	.	nonsynonymous SNV	Krt10:NM_010660:exon6:c.G1232A:p.R411Q	11qD
chr11	99580621	99580621	T	C	exonic	Krtap1-5	.	synonymous SNV	Krtap1-5:NM_027157:exon1:c.A345G:p.P115P	11qD
chr11	99978856	99978856	A	G	exonic	Krtap29-1	.	synonymous SNV	Krtap29-1:NM_001378510:exon1:c.T198C:p.S66S	11qD
chr11	100104189	100104189	A	T	exonic	Krt36	.	nonsynonymous SNV	Krt36:NM_001174099:exon3:c.T556A:p.L186M	11qD
chr11	100248460	100248460	T	C	exonic	Krt16	.	nonsynonymous SNV	Krt16:NM_001313958:exon1:c.A431G:p.K144R,Krt16:NM_008470:exon1:c.A431G:p.K144R	11qD
chr11	100958658	100958658	T	C	exonic	Cavin1	.	nonsynonymous SNV	Cavin1:NM_008986:exon2:c.A1145G:p.D382G	11qD
chr11	102308918	102308918	G	A	exonic	Ubtf	.	synonymous SNV	Ubtf:NM_001362549:exon10:c.C1194T:p.I398I,Ubtf:NM_001362550:exon12:c.C714T:p.I238I,Ubtf:NM_001044383:exon13:c.C1380T:p.I460I,Ubtf:NM_001302954:exon13:c.C1380T:p.I460I,Ubtf:NM_001302955:exon13:c.C1380T:p.I460I,Ubtf:NM_001362545:exon13:c.C1491T:p.I497I,Ubtf:NM_001362548:exon13:c.C1380T:p.I460I,Ubtf:NM_001362551:exon13:c.C357T:p.I119I,Ubtf:NM_001362544:exon14:c.C1491T:p.I497I,Ubtf:NM_001362547:exon1…	11qD
chr11	102480945	102480945	T	A	exonic	Gpatch8	.	nonsynonymous SNV	Gpatch8:NM_001159492:exon8:c.A1766T:p.K589I	11qD
chr11	102908157	102908157	T	G	exonic	Kif18b	.	nonsynonymous SNV	Kif18b:NM_197959:exon13:c.A2217C:p.K739N	11qE1
chr11	103117854	103117854	G	C	exonic	Hexim1	.	synonymous SNV	Hexim1:NM_138753:exon1:c.G933C:p.R311R	11qE1
chr11	105390359	105390359	C	A	exonic	Marchf10	.	nonsynonymous SNV	Marchf10:NM_172568:exon7:c.G1099T:p.G367W	11qE1
chr11	106009048	106009048	T	G	exonic	Kcnh6	.	nonsynonymous SNV	Kcnh6:NM_001037712:exon2:c.T142G:p.F48V	11qE1
chr11	106150353	106150353	G	A	exonic	Map3k3	.	nonsynonymous SNV	Map3k3:NM_011947:exon12:c.G1147A:p.D383N	11qE1
chr11	106782013	106782013	T	G	exonic	Ddx5	.	nonsynonymous SNV	Ddx5:NM_007840:exon13:c.A1685C:p.N562T,Ddx5:NM_001355676:exon14:c.A1685C:p.N562T,Ddx5:NM_001355677:exon14:c.A1685C:p.N562T	11qE1
chr11	107074582	107074582	A	C	exonic	Bptf	.	nonsynonymous SNV	Bptf:NM_001359590:exon11:c.T3440G:p.V1147G,Bptf:NM_176850:exon11:c.T3440G:p.V1147G	11qE1
chr11	108414241	108414241	G	A	exonic	Apoh	.	synonymous SNV	Apoh:NM_013475:exon8:c.G984A:p.E328E	11qE1
chr11	109976482	109976482	A	T	exonic	Abca8b	.	nonsynonymous SNV	Abca8b:NM_001362749:exon6:c.T749A:p.M250K,Abca8b:NM_013851:exon6:c.T749A:p.M250K	11qE1
chr11	114926034	114926034	A	C	exonic	Cd300lb	.	nonsynonymous SNV	Cd300lb:NM_001347651:exon3:c.T181G:p.L61V,Cd300lb:NM_199221:exon3:c.T451G:p.L151V	11qE2
chr11	115421987	115421987	A	G	exonic	Kctd2	.	nonsynonymous SNV	Kctd2:NM_183285:exon2:c.A344G:p.E115G	11qE2
chr11	115894395	115894395	C	T	exonic	Recql5	.	synonymous SNV	Recql5:NM_130454:exon15:c.G2274A:p.K758K	11qE2
chr11	116086913	116086913	T	A	exonic	Wbp2	.	stopgain	Wbp2:NM_001347642:exon1:c.A13T:p.K5X,Wbp2:NM_001361446:exon1:c.A13T:p.K5X,Wbp2:NM_016852:exon1:c.A13T:p.K5X	11qE2
chr11	116804606	116804606	G	T	exonic	Mxra7	.	nonsynonymous SNV	Mxra7:NM_026280:exon4:c.C471A:p.N157K	11qE2
chr11	118032638	118032638	G	T	exonic	Dnah17	.	synonymous SNV	Dnah17:NM_001167746:exon75:c.C12153A:p.T4051T	11qE2
chr11	119477254	119477254	A	G	exonic	Rnf213	.	nonsynonymous SNV	Rnf213:NM_001040005:exon59:c.A14105G:p.K4702R	11qE2
chr11	120070364	120070364	T	C	exonic	Cep131	.	synonymous SNV	Cep131:NM_009734:exon16:c.A1878G:p.A626A	11qE2
chr11	120367992	120367992	A	G	exonic	Fscn2	.	synonymous SNV	Fscn2:NM_172802:exon5:c.A1362G:p.R454R	11qE2
chr11	120720231	120720231	G	T	exonic	Lrrc45	.	nonsynonymous SNV	Lrrc45:NM_153545:exon17:c.G1714T:p.V572F	11qE2
chr11	121708006	121708006	A	G	exonic	Metrnl	.	synonymous SNV	Metrnl:NM_144797:exon2:c.A447G:p.G149G	11qE2
chr12	4712472	4712472	A	C	exonic	Itsn2	.	nonsynonymous SNV	Itsn2:NM_011365:exon38:c.A4651C:p.S1551R,Itsn2:NM_001198968:exon39:c.A4732C:p.S1578R	12qA1.1
chr12	4850825	4850825	A	C	exonic	Wdcp	.	nonsynonymous SNV	Wdcp:NM_001170858:exon2:c.A680C:p.K227T,Wdcp:NM_173416:exon2:c.A680C:p.K227T	12qA1.1
chr12	8005074	8005074	C	A	exonic	Apob	.	nonsynonymous SNV	Apob:NM_009693:exon25:c.C4072A:p.L1358I	12qA1.1
chr12	8005945	8005945	A	T	exonic	Apob	.	stopgain	Apob:NM_009693:exon26:c.A4426T:p.K1476X	12qA1.1
chr12	8012936	8012936	A	G	exonic	Apob	.	nonsynonymous SNV	Apob:NM_009693:exon26:c.A11417G:p.N3806S	12qA1.1
chr12	13272685	13272685	C	T	exonic	Nbas	.	synonymous SNV	Nbas:NM_027706:exon3:c.C198T:p.I66I	12qA1.1
chr12	19406565	19406565	A	G	exonic	Gm5784	.	synonymous SNV	Gm5784:NM_001384145:exon4:c.A732G:p.Q244Q	12qA1.2
chr12	19406819	19406819	G	A	exonic	Gm5784	.	nonsynonymous SNV	Gm5784:NM_001384145:exon4:c.G986A:p.C329Y	12qA1.2
chr12	19407224	19407224	A	T	exonic	Gm5784	.	nonsynonymous SNV	Gm5784:NM_001384145:exon4:c.A1391T:p.H464L	12qA1.2
chr12	19407237	19407237	A	G	exonic	Gm5784	.	synonymous SNV	Gm5784:NM_001384145:exon4:c.A1404G:p.Q468Q	12qA1.2
chr12	19407238	19407238	T	C	exonic	Gm5784	.	nonsynonymous SNV	Gm5784:NM_001384145:exon4:c.T1405C:p.C469R	12qA1.2
chr12	19407251	19407251	C	T	exonic	Gm5784	.	nonsynonymous SNV	Gm5784:NM_001384145:exon4:c.C1418T:p.T473I	12qA1.2
chr12	24215409	24215409	C	T	exonic	Gm21297	.	synonymous SNV	Gm21297:NM_001384261:exon4:c.G864A:p.Q288Q	12qA1.3
chr12	24215436	24215436	C	A	exonic	Gm21297	.	synonymous SNV	Gm21297:NM_001384261:exon4:c.G837T:p.T279T	12qA1.3
chr12	24215519	24215519	C	T	exonic	Gm21297	.	nonsynonymous SNV	Gm21297:NM_001384261:exon4:c.G754A:p.G252R	12qA1.3
chr12	28552175	28552175	G	A	exonic	Dcdc2c	.	synonymous SNV	Dcdc2c:NM_001373956:exon1:c.C129T:p.F43F,Dcdc2c:NM_001373957:exon1:c.C129T:p.F43F,Dcdc2c:NM_001373958:exon1:c.C129T:p.F43F	12qA2
chr12	28565437	28565437	A	G	exonic	Allc	.	synonymous SNV	Allc:NM_001364359:exon5:c.T318C:p.A106A,Allc:NM_053156:exon5:c.T318C:p.A106A	12qA2
chr12	29838145	29838145	C	T	exonic	Myt1l	.	synonymous SNV	Myt1l:NM_001361660:exon11:c.C1614T:p.L538L,Myt1l:NM_001361658:exon12:c.C1749T:p.L583L,Myt1l:NM_001361659:exon12:c.C1677T:p.L559L,Myt1l:NM_001093775:exon13:c.C1818T:p.L606L,Myt1l:NM_001093776:exon13:c.C1812T:p.L604L,Myt1l:NM_001093778:exon13:c.C1809T:p.L603L,Myt1l:NM_001361655:exon13:c.C1818T:p.L606L,Myt1l:NM_001361656:exon13:c.C1812T:p.L604L,Myt1l:NM_001361657:exon13:c.C1812T:p.L604L,Myt1l:NM_008…	12qA2
chr12	29851749	29851749	G	A	exonic	Myt1l	.	synonymous SNV	Myt1l:NM_001361660:exon14:c.G2298A:p.E766E,Myt1l:NM_001361658:exon15:c.G2433A:p.E811E,Myt1l:NM_001361659:exon15:c.G2361A:p.E787E,Myt1l:NM_001093775:exon16:c.G2502A:p.E834E,Myt1l:NM_001093776:exon16:c.G2496A:p.E832E,Myt1l:NM_001093778:exon16:c.G2493A:p.E831E,Myt1l:NM_001361655:exon16:c.G2502A:p.E834E,Myt1l:NM_001361656:exon16:c.G2496A:p.E832E,Myt1l:NM_001361657:exon16:c.G2496A:p.E832E,Myt1l:NM_008…	12qA2
chr12	30094782	30094782	T	C	exonic	Tpo	.	nonsynonymous SNV	Tpo:NM_009417:exon11:c.A1967G:p.D656G	12qA2
chr12	34407789	34407789	T	G	exonic	Hdac9	.	nonsynonymous SNV	Hdac9:NM_024124:exon7:c.A764C:p.K255T,Hdac9:NM_001271386:exon9:c.A836C:p.K279T	12qA3
chr12	40079641	40079641	C	T	exonic	Scin	.	nonsynonymous SNV	Scin:NM_001146196:exon8:c.G1152A:p.M384I,Scin:NM_009132:exon8:c.G1152A:p.M384I	12qB1
chr12	51643136	51643136	T	C	exonic	Strn3	.	nonsynonymous SNV	Strn3:NM_052973:exon8:c.A1064G:p.K355R	12qB3
chr12	51891404	51891404	G	A	exonic	Heatr5a	.	nonsynonymous SNV	Heatr5a:NM_177171:exon29:c.C4490T:p.A1497V	12qB3
chr12	51951076	51951076	T	C	exonic	Heatr5a	.	nonsynonymous SNV	Heatr5a:NM_177171:exon8:c.A1039G:p.T347A	12qC1
chr12	54183948	54183948	A	G	exonic	Egln3	.	synonymous SNV	Egln3:NM_028133:exon3:c.T546C:p.F182F	12qC1
chr12	55676733	55676733	A	C	exonic	Ralgapa1	.	synonymous SNV	Ralgapa1:NM_001003719:exon33:c.T5007G:p.T1669T,Ralgapa1:NM_001112714:exon33:c.T5007G:p.T1669T,Ralgapa1:NM_019994:exon33:c.T5007G:p.T1669T,Ralgapa1:NM_001286263:exon34:c.T5148G:p.T1716T,Ralgapa1:NM_001368814:exon34:c.T6516G:p.T2172T	12qC1
chr12	55722166	55722166	T	C	exonic	Ralgapa1	.	synonymous SNV	Ralgapa1:NM_001368814:exon18:c.A3180G:p.K1060K	12qC1
chr12	59004576	59004576	A	G	exonic	Sec23a	.	nonsynonymous SNV	Sec23a:NM_001361956:exon4:c.T280C:p.F94L,Sec23a:NM_009147:exon4:c.T280C:p.F94L	12qC1
chr12	69838020	69838020	C	A	exonic	Map4k5	.	synonymous SNV	Map4k5:NM_201519:exon13:c.G990T:p.A330A	12qC2
chr12	70043502	70043502	G	C	exonic	Nin	.	synonymous SNV	Nin:NM_001081453:exon16:c.C3138G:p.S1046S,Nin:NM_001286079:exon17:c.C3138G:p.S1046S,Nin:NM_001286080:exon18:c.C3138G:p.S1046S,Nin:NM_008697:exon18:c.C3138G:p.S1046S	12qC2
chr12	70880678	70880678	A	G	exonic	Frmd6	.	nonsynonymous SNV	Frmd6:NM_028127:exon6:c.A431G:p.Q144R	12qC2
chr12	72077183	72077183	G	T	exonic	L3hypdh	.	nonsynonymous SNV	L3hypdh:NM_026038:exon4:c.C900A:p.S300R	12qC3
chr12	72459987	72459987	T	G	exonic	Lrrc9	.	nonsynonymous SNV	Lrrc9:NM_001142728:exon9:c.T1037G:p.V346G,Lrrc9:NM_001142729:exon9:c.T1037G:p.V346G,Lrrc9:NM_030070:exon9:c.T1037G:p.V346G	12qC3
chr12	74897761	74897761	C	T	exonic	Kcnh5	.	nonsynonymous SNV	Kcnh5:NM_172805:exon11:c.G2713A:p.A905T	12qC3
chr12	74897762	74897762	C	T	exonic	Kcnh5	.	synonymous SNV	Kcnh5:NM_172805:exon11:c.G2712A:p.Q904Q	12qC3
chr12	74965295	74965295	A	C	exonic	Kcnh5	.	nonsynonymous SNV	Kcnh5:NM_172805:exon10:c.T1849G:p.F617V	12qC3
chr12	75415807	75415807	A	C	exonic	Gphb5	.	nonsynonymous SNV	Gphb5:NM_175644:exon2:c.T7G:p.L3V	12qC3
chr12	75949089	75949089	A	G	exonic	Syne2	.	synonymous SNV	Syne2:NM_001005510:exon43:c.A6402G:p.G2134G	12qC3
chr12	80759438	80759438	C	T	exonic	Ccdc177	.	nonsynonymous SNV	Ccdc177:NM_001008423:exon2:c.G61A:p.D21N	12qC3
chr12	81315655	81315655	T	A	exonic	Slc8a3	.	nonsynonymous SNV	Slc8a3:NM_001167920:exon2:c.A389T:p.N130I,Slc8a3:NM_080440:exon2:c.A389T:p.N130I	12qD1
chr12	81560686	81560686	G	A	exonic	Adam21	.	nonsynonymous SNV	Adam21:NM_020330:exon2:c.C301T:p.H101Y	12qD1
chr12	83526214	83526214	C	T	exonic	Dcaf4	.	synonymous SNV	Dcaf4:NM_001165256:exon1:c.C102T:p.A34A,Dcaf4:NM_030246:exon2:c.C63T:p.A21A	12qD1
chr12	83776376	83776376	C	G	exonic	Papln	.	nonsynonymous SNV	Papln:NM_130887:exon12:c.C1120G:p.P374A,Papln:NM_001205343:exon13:c.C1186G:p.P396A	12qD1
chr12	83992551	83992551	T	G	exonic	Acot2	.	nonsynonymous SNV	Acot2:NM_134188:exon3:c.T833G:p.L278R	12qD1
chr12	84436772	84436772	C	T	exonic	Aldh6a1	.	synonymous SNV	Aldh6a1:NM_001313967:exon8:c.G765A:p.L255L,Aldh6a1:NM_134042:exon8:c.G999A:p.L333L	12qD1
chr12	84592244	84592244	A	T	exonic	Vsx2	.	nonsynonymous SNV	Vsx2:NM_001301427:exon4:c.A653T:p.E218V,Vsx2:NM_007701:exon4:c.A653T:p.E218V	12qD1
chr12	85030155	85030155	G	A	exonic	Ylpm1	.	nonsynonymous SNV	Ylpm1:NM_178363:exon5:c.G3653A:p.R1218K	12qD1
chr12	87876934	87876934	A	C	exonic	Gm2016	.	nonsynonymous SNV	Gm2016:NM_001122662:exon2:c.A350C:p.E117A	12qD2
chr12	89260232	89260232	G	T	exonic	Nrxn3	.	synonymous SNV	Nrxn3:NM_172544:exon6:c.G636T:p.L212L,Nrxn3:NM_001198587:exon7:c.G1755T:p.L585L	12qD3
chr12	90729664	90729664	C	A	exonic	Dio2	.	unknown	UNKNOWN	12qD3
chr12	91649067	91649067	T	G	exonic	Ston2	.	nonsynonymous SNV	Ston2:NM_175367:exon5:c.A566C:p.N189T	12qD3
chr12	98837354	98837354	C	A	exonic	Eml5	.	nonsynonymous SNV	Eml5:NM_001081191:exon21:c.G3013T:p.A1005S	12qE
chr12	102497518	102497518	C	T	exonic	Golga5	.	synonymous SNV	Golga5:NM_001199004:exon13:c.C2181T:p.Y727Y,Golga5:NM_013747:exon13:c.C2181T:p.Y727Y	12qE
chr12	103021012	103021012	C	A	exonic	Unc79	.	nonsynonymous SNV	Unc79:NM_001081017:exon6:c.C718A:p.H240N	12qE
chr12	105700784	105700784	A	G	exonic	Gskip	.	synonymous SNV	Gskip:NM_178613:exon3:c.A420G:p.R140R	12qE
chr12	105738622	105738622	G	T	exonic	Ak7	.	synonymous SNV	Ak7:NM_030187:exon8:c.G828T:p.V276V	12qE
chr12	108537459	108537459	T	G	exonic	Eml1	.	nonsynonymous SNV	Eml1:NM_001364199:exon18:c.T1753G:p.F585V,Eml1:NM_001364198:exon19:c.T1768G:p.F590V,Eml1:NM_001043335:exon21:c.T2314G:p.F772V,Eml1:NM_001043336:exon21:c.T2221G:p.F741V,Eml1:NM_001286346:exon21:c.T2275G:p.F759V,Eml1:NM_001364195:exon21:c.T2305G:p.F769V,Eml1:NM_001286347:exon22:c.T2272G:p.F758V,Eml1:NM_001364194:exon22:c.T2365G:p.F789V,Eml1:NM_001364196:exon22:c.T2272G:p.F758V,Eml1:NM_001364197:exo…	12qF1
chr12	109592319	109592319	T	A	exonic	Rtl1	.	nonsynonymous SNV	Rtl1:NM_184109:exon2:c.A3085T:p.T1029S	12qF1
chr12	110570744	110570744	A	C	exonic	Ppp2r5c	.	nonsynonymous SNV	Ppp2r5c:NM_001364207:exon11:c.A1131C:p.E377D,Ppp2r5c:NM_001364209:exon11:c.A1131C:p.E377D,Ppp2r5c:NM_001364210:exon11:c.A1131C:p.E377D,Ppp2r5c:NM_001364211:exon11:c.A1131C:p.E377D,Ppp2r5c:NM_001364212:exon11:c.A1062C:p.E354D,Ppp2r5c:NM_001081457:exon12:c.A1302C:p.E434D,Ppp2r5c:NM_001081458:exon12:c.A1302C:p.E434D,Ppp2r5c:NM_001364205:exon12:c.A1302C:p.E434D,Ppp2r5c:NM_001364206:exon12:c.A1302C:p.…	12qF1
chr12	111275683	111275683	C	T	exonic	Amn	.	nonsynonymous SNV	Amn:NM_033603:exon10:c.C1103T:p.A368V	12qF1
chr12	111429487	111429487	G	A	exonic	Exoc3l4	.	nonsynonymous SNV	Exoc3l4:NM_001289489:exon12:c.G1933A:p.D645N,Exoc3l4:NM_028807:exon12:c.G1933A:p.D645N,Exoc3l4:NM_001289487:exon13:c.G1933A:p.D645N,Exoc3l4:NM_001289488:exon13:c.G1933A:p.D645N	12qF1
chr12	111485172	111485172	C	G	exonic	Gm266	.	nonsynonymous SNV	Gm266:NM_001033248:exon1:c.G599C:p.G200A	12qF1
chr12	112040433	112040433	A	G	exonic	Tdrd9	.	synonymous SNV	Tdrd9:NM_029056:exon26:c.A2730G:p.E910E	12qF1
chr12	112611705	112611705	G	A	exonic	Inf2	.	synonymous SNV	Inf2:NM_001374199:exon21:c.G3429A:p.K1143K,Inf2:NM_198411:exon21:c.G3429A:p.K1143K	12qF1
chr12	112639727	112639727	C	A	exonic	Adssl1	.	stopgain	Adssl1:NM_007421:exon12:c.C1287A:p.Y429X	12qF1
chr12	112646964	112646964	C	T	exonic	Siva1	.	nonsynonymous SNV	Siva1:NM_013929:exon2:c.C245T:p.A82V	12qF1
chr12	113133200	113133200	C	T	exonic	Mta1	.	nonsynonymous SNV	Mta1:NM_001364622:exon16:c.C1589T:p.P530L,Mta1:NM_001364623:exon16:c.C1589T:p.P530L,Mta1:NM_054081:exon16:c.C1589T:p.P530L,Mta1:NM_001346696:exon17:c.C1640T:p.P547L,Mta1:NM_001364620:exon17:c.C1640T:p.P547L,Mta1:NM_001364621:exon17:c.C1640T:p.P547L	12qF1
chr12	116054773	116054773	G	A	exonic	Zfp386	.	nonsynonymous SNV	Zfp386:NM_001004066:exon2:c.G61A:p.E21K,Zfp386:NM_001286214:exon2:c.G61A:p.E21K,Zfp386:NM_019565:exon2:c.G61A:p.E21K	12qF2
chr12	117872411	117872411	A	G	exonic	Cdca7l	.	nonsynonymous SNV	Cdca7l:NM_146040:exon4:c.A619G:p.M207V	12qF2
chr12	117895012	117895012	G	C	exonic	Dnah11	.	nonsynonymous SNV	Dnah11:NM_010060:exon76:c.C12362G:p.T4121R	12qF2
chr12	117982969	117982969	C	A	exonic	Dnah11	.	nonsynonymous SNV	Dnah11:NM_010060:exon57:c.G9379T:p.A3127S	12qF2
chr12	117995238	117995238	T	G	exonic	Dnah11	.	nonsynonymous SNV	Dnah11:NM_010060:exon55:c.A8909C:p.K2970T	12qF2
chr12	118848534	118848534	C	T	exonic	Sp8	.	synonymous SNV	Sp8:NM_001379379:exon2:c.C177T:p.S59S,Sp8:NM_001379380:exon2:c.C123T:p.S41S,Sp8:NM_177082:exon3:c.C123T:p.S41S	12qF2
chr12	119446563	119446563	T	A	exonic	Macc1	.	synonymous SNV	Macc1:NM_001163136:exon2:c.T1065A:p.I355I	12qF2
chr13	3933511	3933511	A	C	exonic	Tubal3	.	nonsynonymous SNV	Tubal3:NM_001033879:exon4:c.A1290C:p.E430D	13qA1
chr13	12796849	12796849	T	C	exonic	Prl2c3;Prl2c4	.	synonymous SNV	Prl2c3:NM_011118:exon2:c.A189G:p.S63S,Prl2c4:NM_011954:exon2:c.A189G:p.S63S	13qA1
chr13	21388565	21388565	T	C	exonic	Zkscan3	.	nonsynonymous SNV	Zkscan3:NM_001368182:exon5:c.A395G:p.K132R,Zkscan3:NM_001145778:exon6:c.A896G:p.K299R,Zkscan3:NM_023685:exon6:c.A896G:p.K299R	13qA3.1
chr13	21468303	21468303	C	G	exonic	Nkapl	.	nonsynonymous SNV	Nkapl:NM_025719:exon1:c.G139C:p.G47R	13qA3.1
chr13	22088280	22088280	T	C	exonic	Vmn1r188	.	nonsynonymous SNV	Vmn1r188:NM_145850:exon1:c.T403C:p.W135R	13qA3.1
chr13	22883762	22883762	A	C	exonic	Vmn1r212	.	nonsynonymous SNV	Vmn1r212:NM_134241:exon1:c.T400G:p.F134V	13qA3.1
chr13	24044182	24044182	G	A	exonic	Carmil1	.	stopgain	Carmil1:NM_001311122:exon31:c.C2998T:p.Q1000X,Carmil1:NM_001384122:exon31:c.C2998T:p.Q1000X,Carmil1:NM_026825:exon32:c.C3010T:p.Q1004X	13qA3.1
chr13	24856899	24856899	T	G	exonic	D130043K22Rik	.	synonymous SNV	D130043K22Rik:NM_001081051:exon3:c.T303G:p.T101T	13qA3.1
chr13	29777236	29777236	G	C	exonic	Cdkal1	.	nonsynonymous SNV	Cdkal1:NM_144536:exon5:c.C349G:p.H117D	13qA3.2
chr13	33671254	33671254	T	C	exonic	Serpinb6d	.	nonsynonymous SNV	Serpinb6d:NM_001076790:exon7:c.T910C:p.F304L,Serpinb6d:NM_001300892:exon7:c.T910C:p.F304L	13qA3.3
chr13	33880237	33880237	C	A	exonic	Serpinb6c	.	nonsynonymous SNV	Serpinb6c:NM_001382852:exon7:c.G834T:p.K278N,Serpinb6c:NM_148942:exon7:c.G834T:p.K278N	13qA3.3
chr13	33893872	33893872	A	G	exonic	Serpinb6c	.	nonsynonymous SNV	Serpinb6c:NM_001382852:exon5:c.T514C:p.F172L,Serpinb6c:NM_148942:exon5:c.T514C:p.F172L	13qA3.3
chr13	33893923	33893923	G	A	exonic	Serpinb6c	.	nonsynonymous SNV	Serpinb6c:NM_001382852:exon5:c.C463T:p.P155S,Serpinb6c:NM_148942:exon5:c.C463T:p.P155S	13qA3.3
chr13	36989012	36989012	C	T	exonic	F13a1	.	stopgain	F13a1:NM_001166391:exon4:c.G393A:p.W131X,F13a1:NM_028784:exon4:c.G393A:p.W131X	13qA3.3
chr13	37948937	37948937	G	A	exonic	Rreb1	.	nonsynonymous SNV	Rreb1:NM_001177869:exon12:c.G5087A:p.R1696K	13qA3.3
chr13	40918639	40918639	C	A	exonic	Gcnt2	.	nonsynonymous SNV	Gcnt2:NM_133219:exon1:c.C757A:p.P253T	13qA3.3
chr13	49076580	49076580	C	T	exonic	Wnk2	.	nonsynonymous SNV	Wnk2:NM_001290311:exon12:c.G2467A:p.A823T,Wnk2:NM_001290313:exon12:c.G2467A:p.A823T,Wnk2:NM_029361:exon12:c.G2467A:p.A823T	13qA5
chr13	49721088	49721088	G	A	exonic	Iars	.	nonsynonymous SNV	Iars:NM_172015:exon22:c.G2237A:p.S746N	13qA5
chr13	50645262	50645262	A	C	exonic	Gm904	.	nonsynonymous SNV	Gm904:NM_001033770:exon3:c.A256C:p.K86Q	13qA5
chr13	51682554	51682554	T	C	exonic	Secisbp2	.	synonymous SNV	Secisbp2:NM_001308448:exon16:c.T2202C:p.P734P,Secisbp2:NM_029279:exon16:c.T2394C:p.P798P	13qA5
chr13	51682558	51682558	A	C	exonic	Secisbp2	.	nonsynonymous SNV	Secisbp2:NM_001308448:exon16:c.A2206C:p.S736R,Secisbp2:NM_029279:exon16:c.A2398C:p.S800R	13qA5
chr13	51682559	51682559	G	C	exonic	Secisbp2	.	nonsynonymous SNV	Secisbp2:NM_001308448:exon16:c.G2207C:p.S736T,Secisbp2:NM_029279:exon16:c.G2399C:p.S800T	13qA5
chr13	51682563	51682563	A	C	exonic	Secisbp2	.	synonymous SNV	Secisbp2:NM_001308448:exon16:c.A2211C:p.P737P,Secisbp2:NM_029279:exon16:c.A2403C:p.P801P	13qA5
chr13	51682567	51682567	A	C	exonic	Secisbp2	.	nonsynonymous SNV	Secisbp2:NM_001308448:exon16:c.A2215C:p.M739L,Secisbp2:NM_029279:exon16:c.A2407C:p.M803L	13qA5
chr13	51682568	51682568	T	A	exonic	Secisbp2	.	nonsynonymous SNV	Secisbp2:NM_001308448:exon16:c.T2216A:p.M739K,Secisbp2:NM_029279:exon16:c.T2408A:p.M803K	13qA5
chr13	53117204	53117204	C	T	exonic	Ror2	.	nonsynonymous SNV	Ror2:NM_013846:exon7:c.G1114A:p.V372M	13qB1
chr13	56728628	56728628	A	T	exonic	Smad5	.	nonsynonymous SNV	Smad5:NM_001164041:exon4:c.A774T:p.R258S,Smad5:NM_001164042:exon4:c.A774T:p.R258S,Smad5:NM_008541:exon4:c.A774T:p.R258S	13qB1
chr13	58808863	58808863	T	C	exonic	Ntrk2	.	synonymous SNV	Ntrk2:NM_001025074:exon2:c.T135C:p.C45C,Ntrk2:NM_001282961:exon2:c.T135C:p.C45C,Ntrk2:NM_008745:exon2:c.T135C:p.C45C	13qB1
chr13	60784643	60784643	T	G	exonic	BC051665	.	nonsynonymous SNV	BC051665:NM_199148:exon3:c.A227C:p.E76A	13qB2
chr13	61039464	61039464	T	G	exonic	Ctsq	.	nonsynonymous SNV	Ctsq:NM_029636:exon2:c.A89C:p.K30T	13qB2
chr13	63853728	63853728	A	G	exonic	Ercc6l2	.	nonsynonymous SNV	Ercc6l2:NM_001361124:exon10:c.A1355G:p.E452G,Ercc6l2:NM_001013608:exon11:c.A1700G:p.E567G,Ercc6l2:NM_023507:exon11:c.A1700G:p.E567G	13qB3
chr13	65194302	65194302	C	T	exonic	Nlrp4f	.	nonsynonymous SNV	Nlrp4f:NM_175290:exon3:c.G1528A:p.E510K	13qB3
chr13	65690486	65690486	C	T	exonic	Gm53057	.	nonsynonymous SNV	Gm53057:NM_001384230:exon4:c.G1135A:p.G379R	13qB3
chr13	65690656	65690656	T	G	exonic	Gm53057	.	nonsynonymous SNV	Gm53057:NM_001384230:exon4:c.A965C:p.N322T	13qB3
chr13	65690729	65690729	A	G	exonic	Gm53057	.	nonsynonymous SNV	Gm53057:NM_001384230:exon4:c.T892C:p.S298P	13qB3
chr13	65690874	65690874	A	C	exonic	Gm53057	.	synonymous SNV	Gm53057:NM_001384230:exon4:c.T747G:p.G249G	13qB3
chr13	65691032	65691032	A	G	exonic	Gm53057	.	nonsynonymous SNV	Gm53057:NM_001384230:exon4:c.T589C:p.S197P	13qB3
chr13	65691206	65691206	G	C	exonic	Gm53057	.	nonsynonymous SNV	Gm53057:NM_001384230:exon4:c.C415G:p.P139A	13qB3
chr13	65691209	65691209	C	T	exonic	Gm53057	.	nonsynonymous SNV	Gm53057:NM_001384230:exon4:c.G412A:p.E138K	13qB3
chr13	66418814	66418814	A	T	exonic	2410141K09Rik	.	nonsynonymous SNV	2410141K09Rik:NM_183119:exon4:c.T198A:p.H66Q	13qB3
chr13	66431174	66431174	C	T	exonic	2410141K09Rik	.	nonsynonymous SNV	2410141K09Rik:NM_001290196:exon4:c.G1249A:p.G417R	13qB3
chr13	66431186	66431186	A	C	exonic	2410141K09Rik	.	nonsynonymous SNV	2410141K09Rik:NM_001290196:exon4:c.T1237G:p.C413G	13qB3
chr13	66431244	66431244	T	A	exonic	2410141K09Rik	.	synonymous SNV	2410141K09Rik:NM_001290196:exon4:c.A1179T:p.A393A	13qB3
chr13	66431256	66431256	C	A	exonic	2410141K09Rik	.	synonymous SNV	2410141K09Rik:NM_001290196:exon4:c.G1167T:p.G389G	13qB3
chr13	66431314	66431314	A	G	exonic	2410141K09Rik	.	nonsynonymous SNV	2410141K09Rik:NM_001290196:exon4:c.T1109C:p.L370P	13qB3
chr13	66431532	66431532	C	T	exonic	2410141K09Rik	.	synonymous SNV	2410141K09Rik:NM_001290196:exon4:c.G891A:p.K297K	13qB3
chr13	66431659	66431659	G	C	exonic	2410141K09Rik	.	nonsynonymous SNV	2410141K09Rik:NM_001290196:exon4:c.C764G:p.P255R	13qB3
chr13	66431741	66431741	C	T	exonic	2410141K09Rik	.	nonsynonymous SNV	2410141K09Rik:NM_001290196:exon4:c.G682A:p.G228S	13qB3
chr13	66431826	66431826	G	A	exonic	2410141K09Rik	.	synonymous SNV	2410141K09Rik:NM_001290196:exon4:c.C597T:p.P199P	13qB3
chr13	66431917	66431917	G	T	exonic	2410141K09Rik	.	nonsynonymous SNV	2410141K09Rik:NM_001290196:exon4:c.C506A:p.A169E	13qB3
chr13	66431918	66431918	C	G	exonic	2410141K09Rik	.	nonsynonymous SNV	2410141K09Rik:NM_001290196:exon4:c.G505C:p.A169P	13qB3
chr13	66431998	66431998	C	G	exonic	2410141K09Rik	.	nonsynonymous SNV	2410141K09Rik:NM_001290196:exon4:c.G425C:p.C142S	13qB3
chr13	66432118	66432118	G	T	exonic	2410141K09Rik	.	nonsynonymous SNV	2410141K09Rik:NM_001290196:exon4:c.C305A:p.P102H	13qB3
chr13	67593070	67593070	C	T	exonic	Zfp729b	.	nonsynonymous SNV	Zfp729b:NM_001163246:exon4:c.G1075A:p.E359K	13qB3
chr13	67825394	67825394	A	T	exonic	Zfp273	.	nonsynonymous SNV	Zfp273:NM_198322:exon4:c.A640T:p.I214F	13qB3
chr13	68597496	68597496	A	G	exonic	1700001L19Rik	.	synonymous SNV	1700001L19Rik:NM_027035:exon1:c.A21G:p.K7K	13qB3
chr13	68640776	68640776	C	T	exonic	Adcy2	.	synonymous SNV	Adcy2:NM_153534:exon22:c.G2829A:p.K943K	13qB3
chr13	69615465	69615465	A	T	exonic	Nsun2	.	nonsynonymous SNV	Nsun2:NM_145354:exon4:c.A413T:p.K138M	13qC1
chr13	71960220	71960220	C	T	exonic	Irx1	.	synonymous SNV	Irx1:NM_010573:exon2:c.G342A:p.T114T	13qC1
chr13	72630777	72630777	T	C	exonic	Irx2	.	synonymous SNV	Irx2:NM_010574:exon2:c.T459C:p.I153I	13qC1
chr13	73689730	73689730	C	T	exonic	Slc6a19	.	nonsynonymous SNV	Slc6a19:NM_001359603:exon3:c.G364A:p.E122K,Slc6a19:NM_028878:exon4:c.G649A:p.E217K	13qC1
chr13	77174891	77174891	A	C	exonic	2210408I21Rik	.	nonsynonymous SNV	2210408I21Rik:NM_001081353:exon2:c.A38C:p.D13A,2210408I21Rik:NM_001145676:exon2:c.A38C:p.D13A	13qC1
chr13	81476672	81476672	G	A	exonic	Adgrv1	.	nonsynonymous SNV	Adgrv1:NM_054053:exon54:c.C11177T:p.P3726L	13qC3
chr13	89601498	89601498	A	G	exonic	Hapln1	.	nonsynonymous SNV	Hapln1:NM_013500:exon3:c.A161G:p.H54R	13qC3
chr13	92756534	92756534	G	A	exonic	Thbs4	.	synonymous SNV	Thbs4:NM_011582:exon17:c.C2145T:p.I715I	13qC3
chr13	93063579	93063579	C	G	exonic	Cmya5	.	nonsynonymous SNV	Cmya5:NM_023821:exon9:c.G10240C:p.A3414P	13qC3
chr13	93096711	93096711	C	T	exonic	Cmya5	.	nonsynonymous SNV	Cmya5:NM_023821:exon2:c.G1868A:p.G623E	13qC3
chr13	93096716	93096716	A	C	exonic	Cmya5	.	nonsynonymous SNV	Cmya5:NM_023821:exon2:c.T1863G:p.D621E	13qC3
chr13	93441081	93441081	T	A	exonic	Jmy	.	nonsynonymous SNV	Jmy:NM_021310:exon9:c.A2578T:p.S860C	13qC3
chr13	97945691	97945691	G	A	exonic	Arhgef28	.	nonsynonymous SNV	Arhgef28:NM_012026:exon28:c.C3607T:p.R1203W	13qD1
chr13	99508115	99508115	T	G	exonic	Map1b	.	nonsynonymous SNV	Map1b:NM_008634:exon2:c.A279C:p.E93D	13qD1
chr13	100161909	100161909	A	T	exonic	Naip2	.	nonsynonymous SNV	Naip2:NM_001126182:exon11:c.T1618A:p.Y540N,Naip2:NM_010872:exon11:c.T1618A:p.Y540N	13qD1
chr13	100535052	100535052	G	A	exonic	Ocln	.	stopgain	Ocln:NM_001360539:exon2:c.C214T:p.R72X,Ocln:NM_001360536:exon4:c.C796T:p.R266X,Ocln:NM_001360537:exon4:c.C796T:p.R266X,Ocln:NM_001360538:exon4:c.C796T:p.R266X,Ocln:NM_008756:exon4:c.C796T:p.R266X	13qD1
chr13	100739133	100739133	T	G	exonic	Mrps36	.	nonsynonymous SNV	Mrps36:NM_001190264:exon3:c.A166C:p.S56R,Mrps36:NM_025369:exon3:c.A172C:p.S58R	13qD1
chr13	102736835	102736835	T	C	exonic	Mast4	.	synonymous SNV	Mast4:NM_175171:exon29:c.A6024G:p.K2008K	13qD1
chr13	103823401	103823401	T	C	exonic	Erbin	.	synonymous SNV	Erbin:NM_001289474:exon22:c.A3615G:p.R1205R,Erbin:NM_001289473:exon24:c.A3939G:p.R1313R,Erbin:NM_001289475:exon24:c.A3966G:p.R1322R,Erbin:NM_001005868:exon25:c.A4083G:p.R1361R	13qD1
chr13	104131939	104131939	T	C	exonic	Sgtb	.	nonsynonymous SNV	Sgtb:NM_001361054:exon7:c.T482C:p.L161P,Sgtb:NM_144838:exon7:c.T482C:p.L161P	13qD1
chr13	114857332	114857332	G	A	exonic	Itga2	.	nonsynonymous SNV	Itga2:NM_008396:exon18:c.C2284T:p.P762S	13qD2.2
chr13	119338446	119338446	G	A	exonic	Nnt	.	nonsynonymous SNV	Nnt:NM_001308506:exon16:c.C2288T:p.S763L	13qD2.3
chr13	119706439	119706439	C	A	exonic	Hmgcs1	.	synonymous SNV	Hmgcs1:NM_001291439:exon10:c.C1524A:p.A508A,Hmgcs1:NM_145942:exon11:c.C1524A:p.A508A	13qD2.3
chr14	4350847	4350847	A	T	exonic	2610042L04Rik	.	nonsynonymous SNV	2610042L04Rik:NM_001309398:exon5:c.A380T:p.K127M	14qA1
chr14	7905871	7905871	A	C	exonic	Flnb	.	nonsynonymous SNV	Flnb:NM_001081427:exon21:c.A3620C:p.K1207T,Flnb:NM_134080:exon21:c.A3620C:p.K1207T	14qA1
chr14	8090539	8090539	A	C	exonic	Htd2	.	nonsynonymous SNV	Htd2:NM_001348727:exon6:c.A462C:p.E154D	14qA1
chr14	12467113	12467113	C	A	exonic	Cadps	.	nonsynonymous SNV	Cadps:NM_001359920:exon19:c.G2770T:p.D924Y,Cadps:NM_012061:exon19:c.G2818T:p.D940Y,Cadps:NM_001042617:exon21:c.G2800T:p.D934Y,Cadps:NM_001359919:exon21:c.G2788T:p.D930Y,Cadps:NM_001359921:exon21:c.G2857T:p.D953Y	14qA1
chr14	14351129	14351129	G	A	exonic	Il3ra	.	nonsynonymous SNV	Il3ra:NM_008369:exon9:c.G929A:p.R310Q	14qA1
chr14	20665967	20665967	T	G	exonic	Synpo2l	.	nonsynonymous SNV	Synpo2l:NM_001310431:exon3:c.A549C:p.E183D,Synpo2l:NM_175132:exon3:c.A540C:p.E180D	14qA3
chr14	26903348	26903348	A	G	exonic	Asb14	.	nonsynonymous SNV	Asb14:NM_001170748:exon6:c.A575G:p.K192R,Asb14:NM_080856:exon6:c.A575G:p.K192R	14qA3
chr14	29973444	29973444	G	A	exonic	Selenok	.	unknown	UNKNOWN	14qA3
chr14	31001370	31001370	G	A	exonic	Spcs1	.	synonymous SNV	Spcs1:NM_026911:exon1:c.C48T:p.S16S	14qB
chr14	31110454	31110454	G	A	exonic	Pbrm1	.	nonsynonymous SNV	Pbrm1:NM_001081251:exon29:c.G4373A:p.R1458Q,Pbrm1:NM_001359854:exon30:c.G4427A:p.R1476Q	14qB
chr14	31304811	31304811	T	G	exonic	Dnah1	.	nonsynonymous SNV	Dnah1:NM_001033668:exon13:c.A2255C:p.K752T	14qB
chr14	32541265	32541265	C	G	exonic	Ercc6	.	synonymous SNV	Ercc6:NM_001081221:exon6:c.C1425G:p.R475R	14qB
chr14	33932390	33932390	C	T	exonic	Gdf10	.	nonsynonymous SNV	Gdf10:NM_145741:exon2:c.C853T:p.R285C	14qB
chr14	33955520	33955520	A	G	exonic	Rbp3	.	nonsynonymous SNV	Rbp3:NM_015745:exon1:c.A1424G:p.D475G	14qB
chr14	35452294	35452294	G	A	exonic	Grid1	.	nonsynonymous SNV	Grid1:NM_008166:exon12:c.G1892A:p.R631H	14qB
chr14	37062305	37062305	A	C	exonic	Lrit1	.	nonsynonymous SNV	Lrit1:NM_146245:exon4:c.A1589C:p.N530T	14qB
chr14	44335676	44335676	G	A	exonic	Gm5930	.	nonsynonymous SNV	Gm5930:NM_001374091:exon5:c.C545T:p.A182V	14qC1
chr14	50515527	50515527	T	C	exonic	Olfr742	.	nonsynonymous SNV	Olfr742:NM_146430:exon1:c.T322C:p.F108L	14qC1
chr14	50951495	50951495	T	G	exonic	Pnp	.	nonsynonymous SNV	Pnp:NM_013632:exon6:c.T744G:p.D248E	14qC1
chr14	51452117	51452117	G	C	exonic	Vmn2r89	.	nonsynonymous SNV	Vmn2r89:NM_001378723:exon1:c.G76C:p.A26P,Vmn2r89:NM_001385186:exon1:c.G76C:p.A26P,Vmn2r89:NM_009486:exon1:c.G76C:p.A26P,Vmn2r89:NM_009487:exon1:c.G76C:p.A26P	14qC1
chr14	51452122	51452122	T	C	exonic	Vmn2r89	.	synonymous SNV	Vmn2r89:NM_001378723:exon1:c.T81C:p.S27S,Vmn2r89:NM_001385186:exon1:c.T81C:p.S27S,Vmn2r89:NM_009486:exon1:c.T81C:p.S27S,Vmn2r89:NM_009487:exon1:c.T81C:p.S27S	14qC1
chr14	51452153	51452153	A	G	exonic	Vmn2r89	.	nonsynonymous SNV	Vmn2r89:NM_001378723:exon1:c.A112G:p.S38G,Vmn2r89:NM_001385186:exon1:c.A112G:p.S38G,Vmn2r89:NM_009486:exon1:c.A112G:p.S38G,Vmn2r89:NM_009487:exon1:c.A112G:p.S38G	14qC1
chr14	51452154	51452154	G	A	exonic	Vmn2r89	.	nonsynonymous SNV	Vmn2r89:NM_001378723:exon1:c.G113A:p.S38N,Vmn2r89:NM_001385186:exon1:c.G113A:p.S38N,Vmn2r89:NM_009486:exon1:c.G113A:p.S38N,Vmn2r89:NM_009487:exon1:c.G113A:p.S38N	14qC1
chr14	51455971	51455971	A	C	exonic	Vmn2r89	.	nonsynonymous SNV	Vmn2r89:NM_001378723:exon3:c.A777C:p.Q259H,Vmn2r89:NM_001385186:exon3:c.A777C:p.Q259H,Vmn2r89:NM_009486:exon3:c.A777C:p.Q259H,Vmn2r89:NM_009487:exon3:c.A777C:p.Q259H	14qC1
chr14	51455981	51455981	T	A	exonic	Vmn2r89	.	nonsynonymous SNV	Vmn2r89:NM_001378723:exon3:c.T787A:p.S263T,Vmn2r89:NM_001385186:exon3:c.T787A:p.S263T,Vmn2r89:NM_009486:exon3:c.T787A:p.S263T,Vmn2r89:NM_009487:exon3:c.T787A:p.S263T	14qC1
chr14	51456165	51456165	A	G	exonic	Vmn2r89	.	nonsynonymous SNV	Vmn2r89:NM_001378723:exon3:c.A971G:p.K324R,Vmn2r89:NM_001385186:exon3:c.A971G:p.K324R,Vmn2r89:NM_009486:exon3:c.A971G:p.K324R,Vmn2r89:NM_009487:exon3:c.A971G:p.K324R	14qC1
chr14	51456167	51456167	G	T	exonic	Vmn2r89	.	nonsynonymous SNV	Vmn2r89:NM_001378723:exon3:c.G973T:p.V325F,Vmn2r89:NM_001385186:exon3:c.G973T:p.V325F,Vmn2r89:NM_009486:exon3:c.G973T:p.V325F,Vmn2r89:NM_009487:exon3:c.G973T:p.V325F	14qC1
chr14	51456213	51456213	C	T	exonic	Vmn2r89	.	nonsynonymous SNV	Vmn2r89:NM_001378723:exon3:c.C1019T:p.A340V,Vmn2r89:NM_001385186:exon3:c.C1019T:p.A340V,Vmn2r89:NM_009486:exon3:c.C1019T:p.A340V,Vmn2r89:NM_009487:exon3:c.C1019T:p.A340V	14qC1
chr14	51456222	51456222	C	T	exonic	Vmn2r89	.	nonsynonymous SNV	Vmn2r89:NM_001378723:exon3:c.C1028T:p.P343L,Vmn2r89:NM_001385186:exon3:c.C1028T:p.P343L,Vmn2r89:NM_009486:exon3:c.C1028T:p.P343L,Vmn2r89:NM_009487:exon3:c.C1028T:p.P343L	14qC1
chr14	51456224	51456224	G	A	exonic	Vmn2r89	.	nonsynonymous SNV	Vmn2r89:NM_001378723:exon3:c.G1030A:p.V344I,Vmn2r89:NM_001385186:exon3:c.G1030A:p.V344I,Vmn2r89:NM_009486:exon3:c.G1030A:p.V344I,Vmn2r89:NM_009487:exon3:c.G1030A:p.V344I	14qC1
chr14	51456225	51456225	T	A	exonic	Vmn2r89	.	nonsynonymous SNV	Vmn2r89:NM_001378723:exon3:c.T1031A:p.V344E,Vmn2r89:NM_001385186:exon3:c.T1031A:p.V344E,Vmn2r89:NM_009486:exon3:c.T1031A:p.V344E,Vmn2r89:NM_009487:exon3:c.T1031A:p.V344E	14qC1
chr14	51456288	51456288	G	T	exonic	Vmn2r89	.	nonsynonymous SNV	Vmn2r89:NM_001378723:exon3:c.G1094T:p.S365I,Vmn2r89:NM_001385186:exon3:c.G1094T:p.S365I,Vmn2r89:NM_009486:exon3:c.G1094T:p.S365I,Vmn2r89:NM_009487:exon3:c.G1094T:p.S365I	14qC1
chr14	51456291	51456291	A	G	exonic	Vmn2r89	.	nonsynonymous SNV	Vmn2r89:NM_001378723:exon3:c.A1097G:p.K366R,Vmn2r89:NM_001385186:exon3:c.A1097G:p.K366R,Vmn2r89:NM_009486:exon3:c.A1097G:p.K366R,Vmn2r89:NM_009487:exon3:c.A1097G:p.K366R	14qC1
chr14	51456296	51456296	G	C	exonic	Vmn2r89	.	nonsynonymous SNV	Vmn2r89:NM_001378723:exon3:c.G1102C:p.D368H,Vmn2r89:NM_001385186:exon3:c.G1102C:p.D368H,Vmn2r89:NM_009486:exon3:c.G1102C:p.D368H,Vmn2r89:NM_009487:exon3:c.G1102C:p.D368H	14qC1
chr14	51456300	51456300	T	A	exonic	Vmn2r89	.	nonsynonymous SNV	Vmn2r89:NM_001378723:exon3:c.T1106A:p.L369H,Vmn2r89:NM_001385186:exon3:c.T1106A:p.L369H,Vmn2r89:NM_009486:exon3:c.T1106A:p.L369H,Vmn2r89:NM_009487:exon3:c.T1106A:p.L369H	14qC1
chr14	51456302	51456302	T	A	exonic	Vmn2r89	.	nonsynonymous SNV	Vmn2r89:NM_001378723:exon3:c.T1108A:p.F370I,Vmn2r89:NM_001385186:exon3:c.T1108A:p.F370I,Vmn2r89:NM_009486:exon3:c.T1108A:p.F370I,Vmn2r89:NM_009487:exon3:c.T1108A:p.F370I	14qC1
chr14	51456309	51456309	C	T	exonic	Vmn2r89	.	nonsynonymous SNV	Vmn2r89:NM_001378723:exon3:c.C1115T:p.S372F,Vmn2r89:NM_001385186:exon3:c.C1115T:p.S372F,Vmn2r89:NM_009486:exon3:c.C1115T:p.S372F,Vmn2r89:NM_009487:exon3:c.C1115T:p.S372F	14qC1
chr14	51457381	51457381	G	A	exonic	Vmn2r89	.	synonymous SNV	Vmn2r89:NM_001378723:exon4:c.G1317A:p.R439R,Vmn2r89:NM_001385186:exon4:c.G1317A:p.R439R,Vmn2r89:NM_009487:exon4:c.G1317A:p.R439R	14qC1
chr14	51457390	51457390	G	A	exonic	Vmn2r89	.	synonymous SNV	Vmn2r89:NM_001378723:exon4:c.G1326A:p.T442T,Vmn2r89:NM_001385186:exon4:c.G1326A:p.T442T,Vmn2r89:NM_009487:exon4:c.G1326A:p.T442T	14qC1
chr14	51457396	51457396	G	T	exonic	Vmn2r89	.	synonymous SNV	Vmn2r89:NM_001378723:exon4:c.G1332T:p.P444P,Vmn2r89:NM_001385186:exon4:c.G1332T:p.P444P,Vmn2r89:NM_009487:exon4:c.G1332T:p.P444P	14qC1
chr14	51457493	51457493	T	G	exonic	Vmn2r89	.	nonsynonymous SNV	Vmn2r89:NM_001378723:exon4:c.T1429G:p.L477V,Vmn2r89:NM_001385186:exon4:c.T1429G:p.L477V,Vmn2r89:NM_009487:exon4:c.T1429G:p.L477V	14qC1
chr14	52451209	52451209	C	A	exonic	Olfr1509	.	nonsynonymous SNV	Olfr1509:NM_020514:exon1:c.C795A:p.F265L	14qC2
chr14	54282297	54282297	A	G	exonic	Olfr49	.	synonymous SNV	Olfr49:NM_010991:exon1:c.T597C:p.V199V	14qC2
chr14	54467922	54467922	A	C	exonic	Lrp10	.	nonsynonymous SNV	Lrp10:NM_022993:exon5:c.A568C:p.T190P	14qC2
chr14	54956997	54956997	C	T	exonic	Myh6	.	nonsynonymous SNV	Myh6:NM_001164171:exon19:c.G2174A:p.R725H,Myh6:NM_010856:exon19:c.G2174A:p.R725H	14qC3
chr14	54974957	54974957	G	A	exonic	Myh7	.	synonymous SNV	Myh7:NM_001361607:exon33:c.C4474T:p.L1492L,Myh7:NM_080728:exon33:c.C4474T:p.L1492L	14qC3
chr14	55575840	55575840	G	C	exonic	Fitm1	.	synonymous SNV	Fitm1:NM_026808:exon1:c.G159C:p.R53R	14qC3
chr14	55625147	55625147	A	T	exonic	Rec8	.	nonsynonymous SNV	Rec8:NM_001360389:exon18:c.A1331T:p.K444M,Rec8:NM_001360390:exon18:c.A1043T:p.K348M,Rec8:NM_020002:exon19:c.A1658T:p.K553M	14qC3
chr14	55650923	55650923	A	G	exonic	Tssk4	.	nonsynonymous SNV	Tssk4:NM_001253888:exon2:c.A248G:p.K83R,Tssk4:NM_001253889:exon2:c.A248G:p.K83R,Tssk4:NM_027673:exon2:c.A248G:p.K83R	14qC3
chr14	55780956	55780956	G	A	exonic	Adcy4	.	nonsynonymous SNV	Adcy4:NM_001361604:exon5:c.C533T:p.A178V,Adcy4:NM_080435:exon5:c.C533T:p.A178V	14qC3
chr14	55833615	55833615	T	C	exonic	Nfatc4	.	synonymous SNV	Nfatc4:NM_023699:exon10:c.T2697C:p.P899P	14qC3
chr14	56386141	56386141	G	A	exonic	Atp12a	.	nonsynonymous SNV	Atp12a:NM_138652:exon19:c.G2635A:p.V879I	14qC3
chr14	56504031	56504031	T	C	exonic	Rnf17	.	synonymous SNV	Rnf17:NM_001033043:exon28:c.T3942C:p.T1314T	14qC3
chr14	60691699	60691699	C	T	exonic	Spata13	.	synonymous SNV	Spata13:NM_001033272:exon2:c.C705T:p.S235S	14qD1
chr14	64028758	64028758	C	T	exonic	Rp1l1	.	nonsynonymous SNV	Rp1l1:NM_146246:exon4:c.C1792T:p.H598Y	14qD1
chr14	65293860	65293860	A	T	exonic	Fbxo16	.	nonsynonymous SNV	Fbxo16:NM_001360381:exon4:c.A212T:p.K71M,Fbxo16:NM_001360383:exon4:c.A212T:p.K71M,Fbxo16:NM_015795:exon4:c.A212T:p.K71M	14qD1
chr14	65813948	65813948	T	A	exonic	Pbk	.	nonsynonymous SNV	Pbk:NM_023209:exon5:c.T434A:p.V145D	14qD1
chr14	66107318	66107318	A	G	exonic	Ephx2	.	nonsynonymous SNV	Ephx2:NM_001271403:exon4:c.T502C:p.F168L,Ephx2:NM_001271421:exon4:c.T358C:p.F120L,Ephx2:NM_001271402:exon5:c.T397C:p.F133L,Ephx2:NM_007940:exon5:c.T556C:p.F186L	14qD1
chr14	66727496	66727496	T	G	exonic	Adra1a	.	nonsynonymous SNV	Adra1a:NM_001271759:exon3:c.T934G:p.F312V,Adra1a:NM_001271760:exon3:c.T934G:p.F312V,Adra1a:NM_013461:exon3:c.T934G:p.F312V	14qD1
chr14	67700298	67700298	G	C	exonic	Cdca2	.	nonsynonymous SNV	Cdca2:NM_001110162:exon8:c.C905G:p.T302S,Cdca2:NM_175384:exon8:c.C905G:p.T302S	14qD1
chr14	75125990	75125990	C	T	exonic	Lrrc63	.	nonsynonymous SNV	Lrrc63:NM_027581:exon3:c.G700A:p.E234K	14qD3
chr14	84448274	84448274	A	G	exonic	Pcdh17	.	nonsynonymous SNV	Pcdh17:NM_001013753:exon1:c.A2180G:p.K727R	14qD3
chr14	101912127	101912127	T	C	exonic	Lmo7	.	synonymous SNV	Lmo7:NM_001347628:exon14:c.T2632C:p.L878L,Lmo7:NM_201529:exon17:c.T3331C:p.L1111L	14qE2.3
chr14	121480054	121480054	C	T	exonic	Slc15a1	.	nonsynonymous SNV	Slc15a1:NM_053079:exon11:c.G815A:p.R272Q	14qE5
chr14	121491044	121491044	A	G	exonic	Slc15a1	.	nonsynonymous SNV	Slc15a1:NM_053079:exon4:c.T194C:p.L65P	14qE5
chr14	121555275	121555275	C	T	exonic	Dock9	.	nonsynonymous SNV	Dock9:NM_001128308:exon49:c.G5530A:p.V1844M,Dock9:NM_001347596:exon49:c.G5554A:p.V1852M,Dock9:NM_134074:exon49:c.G5464A:p.V1822M,Dock9:NM_001081039:exon50:c.G5629A:p.V1877M,Dock9:NM_001128307:exon51:c.G5569A:p.V1857M	14qE5
chr15	7305174	7305174	T	G	exonic	Egflam	.	nonsynonymous SNV	Egflam:NM_001289496:exon4:c.A337C:p.S113R,Egflam:NM_178748:exon4:c.A337C:p.S113R	15qA1
chr15	8307882	8307882	T	A	exonic	Nipbl	.	nonsynonymous SNV	Nipbl:NM_027707:exon35:c.A6195T:p.E2065D,Nipbl:NM_201232:exon35:c.A6195T:p.E2065D	15qA1
chr15	10533667	10533667	C	A	exonic	Ttc23l	.	nonsynonymous SNV	Ttc23l:NM_001374772:exon6:c.G789T:p.R263S,Ttc23l:NM_029430:exon6:c.G789T:p.R263S,Ttc23l:NM_001378877:exon7:c.G861T:p.R287S,Ttc23l:NM_001378878:exon7:c.G861T:p.R287S	15qA1
chr15	11391884	11391884	G	T	exonic	Tars	.	nonsynonymous SNV	Tars:NM_033074:exon8:c.C764A:p.P255H	15qA1
chr15	28366357	28366357	G	A	exonic	Dnah5	.	nonsynonymous SNV	Dnah5:NM_133365:exon49:c.G8215A:p.G2739S	15qB1
chr15	28419957	28419957	A	G	exonic	Dnah5	.	synonymous SNV	Dnah5:NM_133365:exon66:c.A11400G:p.G3800G	15qB1
chr15	30966813	30966813	A	C	exonic	Ctnnd2	.	nonsynonymous SNV	Ctnnd2:NM_001355502:exon17:c.A2834C:p.N945T,Ctnnd2:NM_008729:exon18:c.A2909C:p.N970T	15qB2
chr15	34388836	34388836	A	G	exonic	Matn2	.	synonymous SNV	Matn2:NM_001358780:exon6:c.A1071G:p.K357K,Matn2:NM_016762:exon6:c.A1071G:p.K357K	15qB3.1
chr15	34499319	34499319	C	G	exonic	Pop1	.	nonsynonymous SNV	Pop1:NM_026340:exon2:c.C29G:p.A10G,Pop1:NM_152894:exon2:c.C29G:p.A10G	15qB3.1
chr15	38219674	38219674	A	G	exonic	Odf1	.	nonsynonymous SNV	Odf1:NM_008757:exon1:c.A245G:p.Y82C	15qB3.1
chr15	39145247	39145247	C	T	exonic	Dcaf13	.	nonsynonymous SNV	Dcaf13:NM_198606:exon10:c.C1243T:p.R415C	15qB3.1
chr15	47636393	47636393	G	A	exonic	Csmd3	.	nonsynonymous SNV	Csmd3:NM_001081391:exon57:c.C9079T:p.L3027F	15qB3.3
chr15	50661679	50661679	G	C	exonic	Trps1	.	nonsynonymous SNV	Trps1:NM_001310481:exon6:c.C2854G:p.R952G,Trps1:NM_032000:exon6:c.C2842G:p.R948G,Trps1:NM_001310485:exon8:c.C2287G:p.R763G	15qC
chr15	54847269	54847269	G	T	exonic	Enpp2	.	nonsynonymous SNV	Enpp2:NM_015744:exon22:c.C2108A:p.P703Q,Enpp2:NM_001136077:exon23:c.C2264A:p.P755Q,Enpp2:NM_001285994:exon23:c.C2183A:p.P728Q,Enpp2:NM_001285995:exon23:c.C2252A:p.P751Q	15qD1
chr15	55080317	55080317	A	C	exonic	Dscc1	.	nonsynonymous SNV	Dscc1:NM_183089:exon8:c.T967G:p.S323A,Dscc1:NM_001355594:exon9:c.T1156G:p.S386A	15qD1
chr15	58322527	58322527	C	T	exonic	Klhl38	.	nonsynonymous SNV	Klhl38:NM_177755:exon2:c.G805A:p.D269N	15qD1
chr15	60015896	60015896	A	T	exonic	4933412E24Rik	.	nonsynonymous SNV	4933412E24Rik:NM_027668:exon1:c.T694A:p.S232T	15qD1
chr15	63804539	63804539	T	A	exonic	Gsdmc	.	synonymous SNV	Gsdmc:NM_031378:exon2:c.A54T:p.G18G	15qD1
chr15	68187101	68187101	G	A	exonic	Zfat	.	nonsynonymous SNV	Zfat:NM_001145888:exon4:c.C584T:p.A195V,Zfat:NM_198644:exon4:c.C563T:p.A188V	15qD2
chr15	72546015	72546015	T	A	exonic	Kcnk9	.	nonsynonymous SNV	Kcnk9:NM_001033876:exon1:c.A265T:p.T89S	15qD3
chr15	73788031	73788031	G	A	exonic	Mroh5	.	nonsynonymous SNV	Mroh5:NM_001033365:exon11:c.C950T:p.A317V,Mroh5:NM_001368162:exon11:c.C959T:p.A320V	15qD3
chr15	74540898	74540898	C	T	exonic	Adgrb1	.	nonsynonymous SNV	Adgrb1:NM_174991:exon7:c.C1468T:p.R490W	15qD3
chr15	74743101	74743101	C	A	exonic	Slurp2	.	nonsynonymous SNV	Slurp2:NM_001081961:exon3:c.G190T:p.V64L	15qD3
chr15	75220754	75220754	A	C	exonic	Ly6g2	.	synonymous SNV	Ly6g2:NM_001371105:exon4:c.A321C:p.A107A,Ly6g2:NM_001371106:exon4:c.A321C:p.A107A,Ly6g2:NM_001371107:exon4:c.A321C:p.A107A,Ly6g2:NM_001371108:exon4:c.A321C:p.A107A	15qD3
chr15	75863474	75863474	T	G	exonic	Gsdmd	.	nonsynonymous SNV	Gsdmd:NM_026960:exon2:c.T66G:p.D22E	15qD3
chr15	76048231	76048231	G	A	exonic	Scrib	.	nonsynonymous SNV	Scrib:NM_001310542:exon33:c.C4594T:p.P1532S,Scrib:NM_001310543:exon33:c.C4594T:p.P1532S,Scrib:NM_134089:exon34:c.C4678T:p.P1560S	15qD3
chr15	76088329	76088329	T	A	exonic	Nrbp2	.	nonsynonymous SNV	Nrbp2:NM_001358359:exon14:c.A1219T:p.T407S	15qD3
chr15	76662104	76662104	G	T	exonic	Kifc2	.	nonsynonymous SNV	Kifc2:NM_001358911:exon7:c.G685T:p.V229L,Kifc2:NM_001358912:exon7:c.G685T:p.V229L,Kifc2:NM_010630:exon7:c.G685T:p.V229L,Kifc2:NM_001358909:exon8:c.G430T:p.V144L,Kifc2:NM_001358910:exon8:c.G430T:p.V144L	15qD3
chr15	77245491	77245491	T	A	exonic	Rbfox2	.	nonsynonymous SNV	Rbfox2:NM_001358770:exon1:c.A41T:p.E14V,Rbfox2:NM_001358772:exon1:c.A41T:p.E14V	15qD3
chr15	77638007	77638007	A	C	exonic	Apol11b	.	nonsynonymous SNV	Apol11b:NM_001143686:exon3:c.T89G:p.I30R	15qE1
chr15	77775258	77775258	A	G	exonic	Myh9	.	nonsynonymous SNV	Myh9:NM_022410:exon22:c.T2654C:p.L885P	15qE1
chr15	78892021	78892021	C	A	exonic	Gga1	.	nonsynonymous SNV	Gga1:NM_145929:exon13:c.C1263A:p.D421E	15qE1
chr15	79707059	79707059	G	A	exonic	Gtpbp1	.	synonymous SNV	Gtpbp1:NM_013818:exon3:c.G372A:p.A124A	15qE1
chr15	82194921	82194921	T	G	exonic	Srebf2	.	nonsynonymous SNV	Srebf2:NM_033218:exon14:c.T2469G:p.F823L	15qE1
chr15	82764012	82764012	A	C	exonic	Cyp2d40	.	synonymous SNV	Cyp2d40:NM_023623:exon1:c.T99G:p.T33T	15qE1
chr15	83498189	83498189	C	T	exonic	Ttll1	.	nonsynonymous SNV	Ttll1:NM_001357953:exon7:c.G601A:p.V201I,Ttll1:NM_178869:exon7:c.G601A:p.V201I	15qE1
chr15	83582078	83582078	T	C	exonic	Ttll12	.	nonsynonymous SNV	Ttll12:NM_183017:exon8:c.A1181G:p.Q394R	15qE1
chr15	84123071	84123071	A	G	exonic	Pnpla5	.	nonsynonymous SNV	Pnpla5:NM_029427:exon1:c.T43C:p.S15P	15qE2
chr15	85819325	85819325	A	C	exonic	Pkdrej	.	synonymous SNV	Pkdrej:NM_011105:exon1:c.T2409G:p.T803T	15qE2
chr15	88701249	88701249	A	G	exonic	Brd1	.	nonsynonymous SNV	Brd1:NM_001033274:exon8:c.T2381C:p.L794P	15qE3
chr15	89841639	89841639	C	T	exonic	Syt10	.	nonsynonymous SNV	Syt10:NM_018803:exon1:c.G131A:p.G44D	15qE3
chr15	91726240	91726240	T	G	exonic	Lrrk2	.	nonsynonymous SNV	Lrrk2:NM_025730:exon18:c.T2174G:p.V725G	15qE3
chr15	95435097	95435097	A	T	exonic	Nell2	.	nonsynonymous SNV	Nell2:NM_001356951:exon5:c.T580A:p.L194M,Nell2:NM_001289653:exon6:c.T580A:p.L194M,Nell2:NM_001356950:exon6:c.T580A:p.L194M	15qE3
chr15	96417017	96417017	G	A	exonic	Scaf11	.	synonymous SNV	Scaf11:NM_028148:exon12:c.C3783T:p.N1261N	15qF1
chr15	97790681	97790681	C	A	exonic	Slc48a1	.	stopgain	Slc48a1:NM_026353:exon3:c.C399A:p.Y133X	15qF1
chr15	97808022	97808022	C	A	exonic	Hdac7	.	synonymous SNV	Hdac7:NM_001204278:exon9:c.G1002T:p.L334L,Hdac7:NM_001204279:exon9:c.G930T:p.L310L,Hdac7:NM_001204280:exon9:c.G1002T:p.L334L,Hdac7:NM_001204281:exon9:c.G1002T:p.L334L,Hdac7:NM_019572:exon9:c.G1068T:p.L356L,Hdac7:NM_001204275:exon10:c.G1113T:p.L371L,Hdac7:NM_001204277:exon10:c.G1107T:p.L369L,Hdac7:NM_001378971:exon10:c.G1179T:p.L393L,Hdac7:NM_001204276:exon11:c.G1113T:p.L371L	15qF1
chr15	98647621	98647621	A	G	exonic	Ddx23	.	nonsynonymous SNV	Ddx23:NM_001080981:exon14:c.T1805C:p.V602A	15qF1
chr15	98894909	98894909	T	C	exonic	Dhh	.	nonsynonymous SNV	Dhh:NM_007857:exon2:c.A469G:p.N157D	15qF1
chr15	100203266	100203266	T	C	exonic	Dip2b	.	synonymous SNV	Dip2b:NM_172819:exon27:c.T3237C:p.T1079T,Dip2b:NM_001159361:exon32:c.T3939C:p.T1313T	15qF1
chr15	101039910	101039910	G	T	exonic	Scn8a	.	nonsynonymous SNV	Scn8a:NM_011323:exon26:c.G5159T:p.S1720I,Scn8a:NM_001077499:exon27:c.G5159T:p.S1720I	15qF1
chr15	101433138	101433138	A	G	exonic	Krt87	.	nonsynonymous SNV	Krt87:NM_001003668:exon7:c.T1226C:p.I409T	15qF2
chr15	101433139	101433139	T	C	exonic	Krt87	.	nonsynonymous SNV	Krt87:NM_001003668:exon7:c.A1225G:p.I409V	15qF2
chr15	101433148	101433148	C	T	exonic	Krt87	.	nonsynonymous SNV	Krt87:NM_001003668:exon7:c.G1216A:p.V406I	15qF2
chr15	101433149	101433149	A	G	exonic	Krt87	.	synonymous SNV	Krt87:NM_001003668:exon7:c.T1215C:p.D405D	15qF2
chr15	101433155	101433155	C	T	exonic	Krt87	.	synonymous SNV	Krt87:NM_001003668:exon7:c.G1209A:p.G403G	15qF2
chr15	101433156	101433156	C	G	exonic	Krt87	.	nonsynonymous SNV	Krt87:NM_001003668:exon7:c.G1208C:p.G403A	15qF2
chr15	101433160	101433160	A	G	exonic	Krt87	.	synonymous SNV	Krt87:NM_001003668:exon7:c.T1204C:p.L402L	15qF2
chr15	101433173	101433173	C	T	exonic	Krt87	.	synonymous SNV	Krt87:NM_001003668:exon7:c.G1191A:p.V397V	15qF2
chr15	101433185	101433185	T	C	exonic	Krt87	.	synonymous SNV	Krt87:NM_001003668:exon7:c.A1179G:p.E393E	15qF2
chr15	101438531	101438531	G	C	exonic	Krt87	.	synonymous SNV	Krt87:NM_001003668:exon1:c.C240G:p.P80P	15qF2
chr15	101438543	101438543	G	A	exonic	Krt87	.	synonymous SNV	Krt87:NM_001003668:exon1:c.C228T:p.C76C	15qF2
chr15	101438558	101438558	T	A	exonic	Krt87	.	synonymous SNV	Krt87:NM_001003668:exon1:c.A213T:p.R71R	15qF2
chr15	101438564	101438564	C	T	exonic	Krt87	.	synonymous SNV	Krt87:NM_001003668:exon1:c.G207A:p.G69G	15qF2
chr15	101487840	101487840	G	A	exonic	Krt83;Krt85	.	synonymous SNV	Krt83:NM_001201323:exon5:c.C873T:p.A291A	15qF2
chr15	101487866	101487866	T	C	exonic	Krt83;Krt85	.	nonsynonymous SNV	Krt83:NM_001201323:exon5:c.A847G:p.I283V	15qF2
chr15	101848984	101848984	G	C	exonic	Krt1	.	nonsynonymous SNV	Krt1:NM_008473:exon2:c.C790G:p.L264V	15qF2
chr15	101848985	101848985	C	T	exonic	Krt1	.	synonymous SNV	Krt1:NM_008473:exon2:c.G789A:p.E263E	15qF2
chr15	101890551	101890551	A	G	exonic	Krt76	.	nonsynonymous SNV	Krt76:NM_001033177:exon2:c.T698C:p.L233P	15qF2
chr15	102547182	102547182	C	G	exonic	Atf7	.	nonsynonymous SNV	Atf7:NM_001310066:exon8:c.G746C:p.G249A,Atf7:NM_001310067:exon8:c.G746C:p.G249A,Atf7:NM_001310070:exon8:c.G746C:p.G249A	15qF3
chr15	103896013	103896013	C	T	exonic	Mucl2	.	nonsynonymous SNV	Mucl2:NM_009267:exon4:c.G410A:p.R137H	15qF3
chr15	103896015	103896015	T	A	exonic	Mucl2	.	nonsynonymous SNV	Mucl2:NM_009267:exon4:c.A408T:p.Q136H	15qF3
chr15	103896032	103896032	G	C	exonic	Mucl2	.	nonsynonymous SNV	Mucl2:NM_009267:exon4:c.C391G:p.L131V	15qF3
chr15	103896041	103896041	C	T	exonic	Mucl2	.	nonsynonymous SNV	Mucl2:NM_009267:exon4:c.G382A:p.V128I	15qF3
chr15	103896053	103896053	T	C	exonic	Mucl2	.	nonsynonymous SNV	Mucl2:NM_009267:exon4:c.A370G:p.I124V	15qF3
chr15	103897330	103897330	C	T	exonic	Mucl2	.	nonsynonymous SNV	Mucl2:NM_009267:exon3:c.G360A:p.M120I	15qF3
chr15	103897335	103897335	T	C	exonic	Mucl2	.	nonsynonymous SNV	Mucl2:NM_009267:exon3:c.A355G:p.N119D	15qF3
chr15	103897363	103897363	G	T	exonic	Mucl2	.	nonsynonymous SNV	Mucl2:NM_009267:exon3:c.C327A:p.D109E	15qF3
chr16	5089507	5089507	G	A	exonic	Ppl	.	nonsynonymous SNV	Ppl:NM_008909:exon22:c.C2923T:p.R975W	16qA1
chr16	10358377	10358377	G	A	exonic	Tekt5	.	nonsynonymous SNV	Tekt5:NM_001291001:exon7:c.C1303T:p.R435W	16qA1
chr16	13697460	13697460	C	T	exonic	Bfar	.	nonsynonymous SNV	Bfar:NM_001177552:exon4:c.C536T:p.P179L,Bfar:NM_025976:exon6:c.C911T:p.P304L	16qA1
chr16	14410809	14410809	C	A	exonic	Abcc1	.	nonsynonymous SNV	Abcc1:NM_008576:exon8:c.C919A:p.H307N	16qA1
chr16	16484470	16484470	T	A	exonic	Fgd4	.	stopgain	Fgd4:NM_001301817:exon4:c.A583T:p.K195X,Fgd4:NM_001301818:exon4:c.A220T:p.K74X,Fgd4:NM_139232:exon4:c.A220T:p.K74X	16qA3
chr16	17211360	17211360	T	G	exonic	Rimbp3	.	nonsynonymous SNV	Rimbp3:NM_001033338:exon1:c.T2647G:p.L883V	16qA3
chr16	17776543	17776543	T	G	exonic	Klhl22	.	nonsynonymous SNV	Klhl22:NM_001379023:exon3:c.T535G:p.F179V,Klhl22:NM_001379026:exon3:c.T535G:p.F179V,Klhl22:NM_001359068:exon4:c.T535G:p.F179V,Klhl22:NM_001379022:exon4:c.T535G:p.F179V,Klhl22:NM_001379024:exon4:c.T592G:p.F198V,Klhl22:NM_001379025:exon4:c.T535G:p.F179V,Klhl22:NM_145479:exon4:c.T535G:p.F179V	16qA3
chr16	18402641	18402641	G	A	exonic	Arvcf	.	nonsynonymous SNV	Arvcf:NM_001272032:exon8:c.G1787A:p.R596H,Arvcf:NM_001272030:exon9:c.G1979A:p.R660H,Arvcf:NM_001272031:exon9:c.G1805A:p.R602H,Arvcf:NM_001272028:exon10:c.G1997A:p.R666H,Arvcf:NM_001272029:exon10:c.G1979A:p.R660H,Arvcf:NM_033474:exon11:c.G1997A:p.R666H	16qA3
chr16	18872461	18872461	G	A	exonic	Mrpl40	.	synonymous SNV	Mrpl40:NM_010922:exon4:c.C498T:p.T166T	16qA3
chr16	19487048	19487048	T	C	exonic	Olfr166	.	nonsynonymous SNV	Olfr166:NM_147068:exon1:c.T209C:p.L70P	16qA3
chr16	20402310	20402310	G	A	exonic	Abcc5	.	nonsynonymous SNV	Abcc5:NM_176839:exon6:c.C616T:p.R206W	16qA3
chr16	20559344	20559344	C	T	exonic	Abcf3	.	synonymous SNV	Abcf3:NM_013852:exon17:c.C1623T:p.D541D	16qA3
chr16	20741255	20741255	T	C	exonic	Chrd	.	nonsynonymous SNV	Chrd:NM_001278041:exon21:c.T2671C:p.F891L,Chrd:NM_001354996:exon21:c.T2605C:p.F869L,Chrd:NM_009893:exon21:c.T2605C:p.F869L,Chrd:NM_001354995:exon22:c.T1168C:p.F390L	16qB1
chr16	22383589	22383589	C	T	exonic	Etv5	.	nonsynonymous SNV	Etv5:NM_001358428:exon13:c.G1414A:p.E472K,Etv5:NM_023794:exon13:c.G1414A:p.E472K	16qB1
chr16	22469328	22469328	T	G	exonic	Dgkg	.	nonsynonymous SNV	Dgkg:NM_001346673:exon24:c.A2171C:p.N724T,Dgkg:NM_138650:exon25:c.A2288C:p.N763T	16qB1
chr16	22572686	22572686	A	T	exonic	Dgkg	.	nonsynonymous SNV	Dgkg:NM_138650:exon12:c.T1021A:p.S341T	16qB1
chr16	25763313	25763313	G	A	exonic	Trp63	.	nonsynonymous SNV	Trp63:NM_001127259:exon2:c.G110A:p.R37K,Trp63:NM_001127260:exon2:c.G110A:p.R37K,Trp63:NM_001127261:exon2:c.G110A:p.R37K	16qB1
chr16	29409825	29409825	C	A	exonic	Atp13a4	.	nonsynonymous SNV	Atp13a4:NM_001164612:exon26:c.G2893T:p.G965W,Atp13a4:NM_172613:exon26:c.G2836T:p.G946W	16qB2
chr16	32252298	32252298	T	A	exonic	Wdr53	.	nonsynonymous SNV	Wdr53:NM_001185162:exon2:c.T460A:p.S154T,Wdr53:NM_026898:exon2:c.T460A:p.S154T	16qB2
chr16	32273215	32273215	A	T	exonic	Smco1	.	nonsynonymous SNV	Smco1:NM_183283:exon2:c.A110T:p.D37V	16qB3
chr16	32751794	32751794	C	A	exonic	Muc4	.	synonymous SNV	Muc4:NM_080457:exon2:c.C1671A:p.P557P	16qB3
chr16	32751825	32751825	T	C	exonic	Muc4	.	nonsynonymous SNV	Muc4:NM_080457:exon2:c.T1702C:p.S568P	16qB3
chr16	32751851	32751851	G	T	exonic	Muc4	.	nonsynonymous SNV	Muc4:NM_080457:exon2:c.G1728T:p.K576N	16qB3
chr16	32751885	32751885	A	C	exonic	Muc4	.	nonsynonymous SNV	Muc4:NM_080457:exon2:c.A1762C:p.T588P	16qB3
chr16	32751911	32751911	A	G	exonic	Muc4	.	synonymous SNV	Muc4:NM_080457:exon2:c.A1788G:p.S596S	16qB3
chr16	32751922	32751922	A	G	exonic	Muc4	.	nonsynonymous SNV	Muc4:NM_080457:exon2:c.A1799G:p.H600R	16qB3
chr16	32752220	32752220	C	G	exonic	Muc4	.	nonsynonymous SNV	Muc4:NM_080457:exon2:c.C2097G:p.S699R	16qB3
chr16	32752234	32752234	G	C	exonic	Muc4	.	nonsynonymous SNV	Muc4:NM_080457:exon2:c.G2111C:p.S704T	16qB3
chr16	32752238	32752238	T	G	exonic	Muc4	.	nonsynonymous SNV	Muc4:NM_080457:exon2:c.T2115G:p.N705K	16qB3
chr16	32752253	32752253	C	A	exonic	Muc4	.	synonymous SNV	Muc4:NM_080457:exon2:c.C2130A:p.T710T	16qB3
chr16	32752292	32752292	A	C	exonic	Muc4	.	synonymous SNV	Muc4:NM_080457:exon2:c.A2169C:p.S723S	16qB3
chr16	32752294	32752294	G	C	exonic	Muc4	.	nonsynonymous SNV	Muc4:NM_080457:exon2:c.G2171C:p.R724P	16qB3
chr16	32752302	32752302	A	T	exonic	Muc4	.	nonsynonymous SNV	Muc4:NM_080457:exon2:c.A2179T:p.I727F	16qB3
chr16	32752343	32752343	T	G	exonic	Muc4	.	synonymous SNV	Muc4:NM_080457:exon2:c.T2220G:p.G740G	16qB3
chr16	32752359	32752359	T	C	exonic	Muc4	.	nonsynonymous SNV	Muc4:NM_080457:exon2:c.T2236C:p.Y746H	16qB3
chr16	32752371	32752371	A	T	exonic	Muc4	.	nonsynonymous SNV	Muc4:NM_080457:exon2:c.A2248T:p.M750L	16qB3
chr16	32752379	32752379	C	T	exonic	Muc4	.	synonymous SNV	Muc4:NM_080457:exon2:c.C2256T:p.S752S	16qB3
chr16	32752384	32752384	C	G	exonic	Muc4	.	nonsynonymous SNV	Muc4:NM_080457:exon2:c.C2261G:p.A754G	16qB3
chr16	32752385	32752385	T	A	exonic	Muc4	.	synonymous SNV	Muc4:NM_080457:exon2:c.T2262A:p.A754A	16qB3
chr16	32752398	32752398	C	A	exonic	Muc4	.	nonsynonymous SNV	Muc4:NM_080457:exon2:c.C2275A:p.H759N	16qB3
chr16	32752446	32752446	A	G	exonic	Muc4	.	nonsynonymous SNV	Muc4:NM_080457:exon2:c.A2323G:p.R775G	16qB3
chr16	32752449	32752449	C	T	exonic	Muc4	.	nonsynonymous SNV	Muc4:NM_080457:exon2:c.C2326T:p.H776Y	16qB3
chr16	32752456	32752456	T	C	exonic	Muc4	.	nonsynonymous SNV	Muc4:NM_080457:exon2:c.T2333C:p.I778T	16qB3
chr16	32752533	32752533	A	G	exonic	Muc4	.	nonsynonymous SNV	Muc4:NM_080457:exon2:c.A2410G:p.T804A	16qB3
chr16	32752545	32752545	T	A	exonic	Muc4	.	nonsynonymous SNV	Muc4:NM_080457:exon2:c.T2422A:p.S808T	16qB3
chr16	32752547	32752547	A	T	exonic	Muc4	.	synonymous SNV	Muc4:NM_080457:exon2:c.A2424T:p.S808S	16qB3
chr16	32752569	32752569	C	T	exonic	Muc4	.	nonsynonymous SNV	Muc4:NM_080457:exon2:c.C2446T:p.P816S	16qB3
chr16	32753764	32753764	C	A	exonic	Muc4	.	synonymous SNV	Muc4:NM_080457:exon3:c.C3639A:p.S1213S	16qB3
chr16	32753770	32753770	C	T	exonic	Muc4	.	synonymous SNV	Muc4:NM_080457:exon3:c.C3645T:p.N1215N	16qB3
chr16	32753823	32753823	C	T	exonic	Muc4	.	nonsynonymous SNV	Muc4:NM_080457:exon3:c.C3698T:p.P1233L	16qB3
chr16	32753848	32753848	G	T	exonic	Muc4	.	nonsynonymous SNV	Muc4:NM_080457:exon3:c.G3723T:p.K1241N	16qB3
chr16	32753849	32753849	G	A	exonic	Muc4	.	nonsynonymous SNV	Muc4:NM_080457:exon3:c.G3724A:p.G1242R	16qB3
chr16	32753863	32753863	T	G	exonic	Muc4	.	nonsynonymous SNV	Muc4:NM_080457:exon3:c.T3738G:p.N1246K	16qB3
chr16	32753874	32753874	C	A	exonic	Muc4	.	nonsynonymous SNV	Muc4:NM_080457:exon3:c.C3749A:p.T1250N	16qB3
chr16	32753880	32753880	C	T	exonic	Muc4	.	nonsynonymous SNV	Muc4:NM_080457:exon3:c.C3755T:p.T1252I	16qB3
chr16	32753886	32753886	A	T	exonic	Muc4	.	nonsynonymous SNV	Muc4:NM_080457:exon3:c.A3761T:p.E1254V	16qB3
chr16	32753887	32753887	G	T	exonic	Muc4	.	nonsynonymous SNV	Muc4:NM_080457:exon3:c.G3762T:p.E1254D	16qB3
chr16	32753895	32753895	C	T	exonic	Muc4	.	nonsynonymous SNV	Muc4:NM_080457:exon3:c.C3770T:p.T1257I	16qB3
chr16	32753901	32753901	C	A	exonic	Muc4	.	nonsynonymous SNV	Muc4:NM_080457:exon3:c.C3776A:p.T1259N	16qB3
chr16	32753916	32753916	C	T	exonic	Muc4	.	nonsynonymous SNV	Muc4:NM_080457:exon3:c.C3791T:p.S1264L	16qB3
chr16	32753917	32753917	A	C	exonic	Muc4	.	synonymous SNV	Muc4:NM_080457:exon3:c.A3792C:p.S1264S	16qB3
chr16	32753919	32753919	G	C	exonic	Muc4	.	nonsynonymous SNV	Muc4:NM_080457:exon3:c.G3794C:p.R1265P	16qB3
chr16	32753927	32753927	A	T	exonic	Muc4	.	nonsynonymous SNV	Muc4:NM_080457:exon3:c.A3802T:p.I1268F	16qB3
chr16	32753955	32753955	C	A	exonic	Muc4	.	nonsynonymous SNV	Muc4:NM_080457:exon3:c.C3830A:p.T1277K	16qB3
chr16	32754393	32754393	G	T	exonic	Muc4	.	nonsynonymous SNV	Muc4:NM_080457:exon4:c.G4266T:p.K1422N	16qB3
chr16	32754394	32754394	G	A	exonic	Muc4	.	nonsynonymous SNV	Muc4:NM_080457:exon4:c.G4267A:p.G1423R	16qB3
chr16	32754425	32754425	A	T	exonic	Muc4	.	nonsynonymous SNV	Muc4:NM_080457:exon4:c.A4298T:p.N1433I	16qB3
chr16	32754426	32754426	T	C	exonic	Muc4	.	synonymous SNV	Muc4:NM_080457:exon4:c.T4299C:p.N1433N	16qB3
chr16	32754427	32754427	G	C	exonic	Muc4	.	nonsynonymous SNV	Muc4:NM_080457:exon4:c.G4300C:p.A1434P	16qB3
chr16	32754529	32754529	C	A	exonic	Muc4	.	nonsynonymous SNV	Muc4:NM_080457:exon4:c.C4402A:p.H1468N	16qB3
chr16	32754535	32754535	C	T	exonic	Muc4	.	nonsynonymous SNV	Muc4:NM_080457:exon4:c.C4408T:p.P1470S	16qB3
chr16	32754541	32754541	A	T	exonic	Muc4	.	nonsynonymous SNV	Muc4:NM_080457:exon4:c.A4414T:p.M1472L	16qB3
chr16	32754546	32754546	T	C	exonic	Muc4	.	synonymous SNV	Muc4:NM_080457:exon4:c.T4419C:p.S1473S	16qB3
chr16	32754577	32754577	T	A	exonic	Muc4	.	nonsynonymous SNV	Muc4:NM_080457:exon4:c.T4450A:p.S1484T	16qB3
chr16	32754580	32754580	T	A	exonic	Muc4	.	nonsynonymous SNV	Muc4:NM_080457:exon4:c.T4453A:p.S1485T	16qB3
chr16	32754599	32754599	T	G	exonic	Muc4	.	nonsynonymous SNV	Muc4:NM_080457:exon4:c.T4472G:p.I1491S	16qB3
chr16	32754619	32754619	C	T	exonic	Muc4	.	nonsynonymous SNV	Muc4:NM_080457:exon4:c.C4492T:p.H1498Y	16qB3
chr16	32754880	32754880	C	T	exonic	Muc4	.	nonsynonymous SNV	Muc4:NM_080457:exon4:c.C4753T:p.P1585S	16qB3
chr16	32754885	32754885	C	T	exonic	Muc4	.	synonymous SNV	Muc4:NM_080457:exon4:c.C4758T:p.G1586G	16qB3
chr16	32754963	32754963	T	C	exonic	Muc4	.	synonymous SNV	Muc4:NM_080457:exon4:c.T4836C:p.S1612S	16qB3
chr16	32754967	32754967	C	G	exonic	Muc4	.	nonsynonymous SNV	Muc4:NM_080457:exon4:c.C4840G:p.Q1614E	16qB3
chr16	32755007	32755007	C	T	exonic	Muc4	.	nonsynonymous SNV	Muc4:NM_080457:exon4:c.C4880T:p.T1627I	16qB3
chr16	32755008	32755008	A	G	exonic	Muc4	.	synonymous SNV	Muc4:NM_080457:exon4:c.A4881G:p.T1627T	16qB3
chr16	32755053	32755053	C	A	exonic	Muc4	.	synonymous SNV	Muc4:NM_080457:exon4:c.C4926A:p.S1642S	16qB3
chr16	32755676	32755676	C	G	exonic	Muc4	.	nonsynonymous SNV	Muc4:NM_080457:exon4:c.C5549G:p.A1850G	16qB3
chr16	32755677	32755677	T	A	exonic	Muc4	.	synonymous SNV	Muc4:NM_080457:exon4:c.T5550A:p.A1850A	16qB3
chr16	32755684	32755684	T	A	exonic	Muc4	.	nonsynonymous SNV	Muc4:NM_080457:exon4:c.T5557A:p.S1853T	16qB3
chr16	32755690	32755690	C	A	exonic	Muc4	.	nonsynonymous SNV	Muc4:NM_080457:exon4:c.C5563A:p.H1855N	16qB3
chr16	32755699	32755699	T	A	exonic	Muc4	.	nonsynonymous SNV	Muc4:NM_080457:exon4:c.T5572A:p.S1858T	16qB3
chr16	32755703	32755703	C	G	exonic	Muc4	.	nonsynonymous SNV	Muc4:NM_080457:exon4:c.C5576G:p.T1859R	16qB3
chr16	32755705	32755705	G	A	exonic	Muc4	.	nonsynonymous SNV	Muc4:NM_080457:exon4:c.G5578A:p.A1860T	16qB3
chr16	32755717	32755717	G	C	exonic	Muc4	.	nonsynonymous SNV	Muc4:NM_080457:exon4:c.G5590C:p.E1864Q	16qB3
chr16	32755721	32755721	T	G	exonic	Muc4	.	nonsynonymous SNV	Muc4:NM_080457:exon4:c.T5594G:p.I1865S	16qB3
chr16	32755792	32755792	A	T	exonic	Muc4	.	nonsynonymous SNV	Muc4:NM_080457:exon4:c.A5665T:p.T1889S	16qB3
chr16	32755805	32755805	C	T	exonic	Muc4	.	nonsynonymous SNV	Muc4:NM_080457:exon4:c.C5678T:p.S1893L	16qB3
chr16	32755843	32755843	T	G	exonic	Muc4	.	nonsynonymous SNV	Muc4:NM_080457:exon4:c.T5716G:p.S1906A	16qB3
chr16	32755857	32755857	G	C	exonic	Muc4	.	nonsynonymous SNV	Muc4:NM_080457:exon4:c.G5730C:p.L1910F	16qB3
chr16	32755861	32755861	C	A	exonic	Muc4	.	nonsynonymous SNV	Muc4:NM_080457:exon4:c.C5734A:p.P1912T	16qB3
chr16	32755886	32755886	A	G	exonic	Muc4	.	nonsynonymous SNV	Muc4:NM_080457:exon4:c.A5759G:p.E1920G	16qB3
chr16	32755889	32755889	A	G	exonic	Muc4	.	nonsynonymous SNV	Muc4:NM_080457:exon4:c.A5762G:p.N1921S	16qB3
chr16	32755892	32755892	T	A	exonic	Muc4	.	nonsynonymous SNV	Muc4:NM_080457:exon4:c.T5765A:p.M1922K	16qB3
chr16	32755909	32755909	C	T	exonic	Muc4	.	nonsynonymous SNV	Muc4:NM_080457:exon4:c.C5782T:p.P1928S	16qB3
chr16	32756076	32756076	A	T	exonic	Muc4	.	nonsynonymous SNV	Muc4:NM_080457:exon4:c.A5949T:p.L1983F	16qB3
chr16	34690804	34690804	G	A	exonic	Ccdc14	.	nonsynonymous SNV	Ccdc14:NM_172824:exon1:c.G147A:p.M49I	16qB3
chr16	35841586	35841586	C	G	exonic	Parp14	.	nonsynonymous SNV	Parp14:NM_001039530:exon13:c.G4078C:p.D1360H	16qB3
chr16	36772445	36772445	A	G	exonic	Slc15a2	.	nonsynonymous SNV	Slc15a2:NM_001145899:exon6:c.T629C:p.M210T,Slc15a2:NM_021301:exon6:c.T629C:p.M210T	16qB3
chr16	36918971	36918971	G	A	exonic	Golgb1	.	synonymous SNV	Golgb1:NM_030035:exon14:c.G7794A:p.Q2598Q	16qB3
chr16	36919742	36919742	A	C	exonic	Golgb1	.	nonsynonymous SNV	Golgb1:NM_030035:exon14:c.A8565C:p.E2855D	16qB3
chr16	44401466	44401466	G	T	exonic	Cfap44	.	nonsynonymous SNV	Cfap44:NM_001033247:exon2:c.G41T:p.R14I	16qB4
chr16	55816438	55816438	G	C	exonic	Nfkbiz	.	nonsynonymous SNV	Nfkbiz:NM_001159394:exon7:c.C1499G:p.A500G,Nfkbiz:NM_001159395:exon8:c.C1202G:p.A401G,Nfkbiz:NM_030612:exon9:c.C1499G:p.A500G	16qC1.1
chr16	55818236	55818236	T	C	exonic	Nfkbiz	.	nonsynonymous SNV	Nfkbiz:NM_001159394:exon5:c.A860G:p.Y287C,Nfkbiz:NM_001159395:exon6:c.A563G:p.Y188C,Nfkbiz:NM_030612:exon7:c.A860G:p.Y287C	16qC1.1
chr16	57166188	57166188	T	C	exonic	Nit2	.	synonymous SNV	Nit2:NM_023175:exon2:c.A36G:p.Q12Q	16qC1.1
chr16	57513405	57513405	G	C	exonic	Filip1l	.	nonsynonymous SNV	Filip1l:NM_001040397:exon4:c.G560C:p.S187T	16qC1.1
chr16	59558625	59558625	A	C	exonic	Crybg3	.	nonsynonymous SNV	Crybg3:NM_174848:exon4:c.T2265G:p.D755E	16qC1.3
chr16	59559487	59559487	T	C	exonic	Crybg3	.	nonsynonymous SNV	Crybg3:NM_174848:exon4:c.A1403G:p.K468R	16qC1.3
chr16	75758185	75758185	C	T	exonic	Hspa13	.	nonsynonymous SNV	Hspa13:NM_030201:exon5:c.G1012A:p.G338S	16qC3.1
chr16	78547754	78547754	T	G	exonic	D16Ertd472e	.	synonymous SNV	D16Ertd472e:NM_001252438:exon3:c.A465C:p.S155S,D16Ertd472e:NM_001252439:exon3:c.A465C:p.S155S,D16Ertd472e:NM_001252440:exon3:c.A465C:p.S155S,D16Ertd472e:NM_025967:exon3:c.A465C:p.S155S	16qC3.1
chr16	85080009	85080009	A	C	exonic	App	.	nonsynonymous SNV	App:NM_001198823:exon5:c.T493G:p.L165V,App:NM_001198824:exon5:c.T493G:p.L165V,App:NM_001198825:exon5:c.T493G:p.L165V,App:NM_001198826:exon5:c.T493G:p.L165V,App:NM_007471:exon5:c.T493G:p.L165V	16qC3.3
chr16	89403711	89403711	T	C	exonic	Krtap21-1	.	synonymous SNV	Krtap21-1:NM_028621:exon1:c.A42G:p.G14G	16qC3.3
chr16	91055813	91055813	T	A	exonic	4932438H23Rik	.	nonsynonymous SNV	4932438H23Rik:NM_001163695:exon2:c.A380T:p.H127L,4932438H23Rik:NM_028905:exon3:c.A380T:p.H127L	16qC3.3
chr16	91583293	91583293	G	C	exonic	Tmem50b	.	synonymous SNV	Tmem50b:NM_030018:exon3:c.C195G:p.S65S	16qC3.3
chr16	93763326	93763326	C	T	exonic	Dop1b	.	nonsynonymous SNV	Dop1b:NM_001357118:exon14:c.C2159T:p.T720I,Dop1b:NM_027293:exon15:c.C2513T:p.T838I	16qC4
chr16	98010624	98010624	T	A	exonic	B230307C23Rik	.	nonsynonymous SNV	B230307C23Rik:NM_001362093:exon4:c.T697A:p.S233T	16qC4
chr16	98010637	98010637	T	A	exonic	B230307C23Rik	.	nonsynonymous SNV	B230307C23Rik:NM_001362093:exon4:c.T710A:p.M237K	16qC4
chr16	98010685	98010685	A	G	exonic	B230307C23Rik	.	nonsynonymous SNV	B230307C23Rik:NM_001362093:exon4:c.A758G:p.D253G	16qC4
chr16	98010701	98010701	T	C	exonic	B230307C23Rik	.	synonymous SNV	B230307C23Rik:NM_001362093:exon4:c.T774C:p.H258H	16qC4
chr16	98010801	98010801	A	G	exonic	B230307C23Rik	.	nonsynonymous SNV	B230307C23Rik:NM_001362093:exon4:c.A874G:p.R292G	16qC4
chr16	98010960	98010960	A	G	exonic	B230307C23Rik	.	nonsynonymous SNV	B230307C23Rik:NM_001362093:exon4:c.A1033G:p.I345V	16qC4
chr16	98010982	98010982	T	A	exonic	B230307C23Rik	.	nonsynonymous SNV	B230307C23Rik:NM_001362093:exon4:c.T1055A:p.F352Y	16qC4
chr16	98011005	98011005	A	G	exonic	B230307C23Rik	.	nonsynonymous SNV	B230307C23Rik:NM_001362093:exon4:c.A1078G:p.T360A	16qC4
chr16	98011095	98011095	G	A	exonic	B230307C23Rik	.	nonsynonymous SNV	B230307C23Rik:NM_001362093:exon4:c.G1168A:p.A390T	16qC4
chr16	98011115	98011115	A	C	exonic	B230307C23Rik	.	nonsynonymous SNV	B230307C23Rik:NM_001362093:exon4:c.A1188C:p.Q396H	16qC4
chr16	98011117	98011117	G	T	exonic	B230307C23Rik	.	nonsynonymous SNV	B230307C23Rik:NM_001362093:exon4:c.G1190T:p.S397I	16qC4
chr16	98011154	98011154	G	A	exonic	B230307C23Rik	.	synonymous SNV	B230307C23Rik:NM_001362093:exon4:c.G1227A:p.K409K	16qC4
chr16	98011159	98011159	T	A	exonic	B230307C23Rik	.	nonsynonymous SNV	B230307C23Rik:NM_001362093:exon4:c.T1232A:p.I411N	16qC4
chr16	98011192	98011192	G	C	exonic	B230307C23Rik	.	nonsynonymous SNV	B230307C23Rik:NM_001362093:exon4:c.G1265C:p.S422T	16qC4
chr16	98011201	98011201	G	T	exonic	B230307C23Rik	.	nonsynonymous SNV	B230307C23Rik:NM_001362093:exon4:c.G1274T:p.G425V	16qC4
chr16	98011207	98011207	A	G	exonic	B230307C23Rik	.	nonsynonymous SNV	B230307C23Rik:NM_001362093:exon4:c.A1280G:p.K427R	16qC4
chr16	98011228	98011228	A	T	exonic	B230307C23Rik	.	nonsynonymous SNV	B230307C23Rik:NM_001362093:exon4:c.A1301T:p.K434I	16qC4
chr16	98011247	98011247	C	A	exonic	B230307C23Rik	.	nonsynonymous SNV	B230307C23Rik:NM_001362093:exon4:c.C1320A:p.H440Q	16qC4
chr16	98011298	98011298	T	A	exonic	B230307C23Rik	.	synonymous SNV	B230307C23Rik:NM_001362093:exon4:c.T1371A:p.I457I	16qC4
chr16	98011373	98011373	C	T	exonic	B230307C23Rik	.	synonymous SNV	B230307C23Rik:NM_001362093:exon4:c.C1446T:p.H482H	16qC4
chr16	98011674	98011674	A	G	exonic	B230307C23Rik	.	nonsynonymous SNV	B230307C23Rik:NM_001362093:exon4:c.A1747G:p.S583G	16qC4
chr16	98011909	98011909	G	A	exonic	B230307C23Rik	.	nonsynonymous SNV	B230307C23Rik:NM_001362093:exon4:c.G1982A:p.C661Y	16qC4
chr16	98011917	98011917	G	A	exonic	B230307C23Rik	.	nonsynonymous SNV	B230307C23Rik:NM_001362093:exon4:c.G1990A:p.D664N	16qC4
chr16	98011928	98011928	T	C	exonic	B230307C23Rik	.	synonymous SNV	B230307C23Rik:NM_001362093:exon4:c.T2001C:p.G667G	16qC4
chr16	98011934	98011934	A	C	exonic	B230307C23Rik	.	synonymous SNV	B230307C23Rik:NM_001362093:exon4:c.A2007C:p.A669A	16qC4
chr16	98011949	98011949	T	A	exonic	B230307C23Rik	.	nonsynonymous SNV	B230307C23Rik:NM_001362093:exon4:c.T2022A:p.S674R	16qC4
chr17	3162983	3162983	T	G	exonic	Scaf8	.	nonsynonymous SNV	Scaf8:NM_134123:exon5:c.T346G:p.L116V	17qA1
chr17	3415019	3415019	C	T	exonic	Tiam2	.	nonsynonymous SNV	Tiam2:NM_001122998:exon3:c.C1022T:p.S341F,Tiam2:NM_011878:exon3:c.C1022T:p.S341F	17qA1
chr17	6048918	6048918	G	A	exonic	Serac1	.	nonsynonymous SNV	Serac1:NM_001360148:exon14:c.C1507T:p.P503S,Serac1:NM_177311:exon14:c.C1507T:p.P503S,Serac1:NM_001111017:exon15:c.C1597T:p.P533S	17qA1
chr17	6301414	6301414	A	C	exonic	Tmem181a	.	nonsynonymous SNV	Tmem181a:NM_001033178:exon13:c.A1067C:p.K356T,Tmem181a:NM_001357884:exon13:c.A1190C:p.K397T	17qA1
chr17	7326449	7326449	G	C	exonic	Tcp10a	.	nonsynonymous SNV	Tcp10a:NM_011553:exon4:c.G172C:p.A58P	17qA1
chr17	7351526	7351526	T	G	exonic	Ttll2	.	nonsynonymous SNV	Ttll2:NM_001098267:exon2:c.A1001C:p.D334A	17qA1
chr17	7782479	7782479	T	G	exonic	Fndc1	.	nonsynonymous SNV	Fndc1:NM_001081416:exon5:c.A611C:p.E204A	17qA1
chr17	8245176	8245176	T	G	exonic	Ccr6	.	synonymous SNV	Ccr6:NM_001190338:exon1:c.T99G:p.T33T	17qA1
chr17	12425681	12425681	A	T	exonic	Slc22a3	.	stopgain	Slc22a3:NM_011395:exon9:c.T1416A:p.C472X	17qA1
chr17	12614776	12614776	G	A	exonic	Slc22a2	.	nonsynonymous SNV	Slc22a2:NM_001355767:exon8:c.G1342A:p.E448K,Slc22a2:NM_013667:exon8:c.G1342A:p.E448K	17qA1
chr17	12662794	12662794	C	T	exonic	Slc22a1	.	synonymous SNV	Slc22a1:NM_009202:exon5:c.G927A:p.K309K	17qA1
chr17	17039837	17039837	G	A	exonic	Gm51425	.	synonymous SNV	Gm51425:NM_001374002:exon4:c.G1059A:p.E353E,Gm51425:NM_001374000:exon5:c.G936A:p.E312E	17qA3.1
chr17	17040056	17040056	T	A	exonic	Gm51425	.	nonsynonymous SNV	Gm51425:NM_001374002:exon4:c.T1278A:p.H426Q,Gm51425:NM_001374000:exon5:c.T1155A:p.H385Q	17qA3.1
chr17	17040233	17040233	T	A	exonic	Gm51425	.	synonymous SNV	Gm51425:NM_001374002:exon4:c.T1455A:p.T485T,Gm51425:NM_001374000:exon5:c.T1332A:p.T444T	17qA3.1
chr17	17040284	17040284	C	T	exonic	Gm51425	.	synonymous SNV	Gm51425:NM_001374002:exon4:c.C1506T:p.G502G,Gm51425:NM_001374000:exon5:c.C1383T:p.G461G	17qA3.1
chr17	17733617	17733617	C	A	exonic	Vmn2r90	.	nonsynonymous SNV	Vmn2r90:NM_001104539:exon6:c.C2042A:p.A681E	17qA3.2
chr17	18021963	18021963	T	C	exonic	Fpr-rs4	.	synonymous SNV	Fpr-rs4:NM_008041:exon1:c.T231C:p.T77T	17qA3.2
chr17	18022694	18022694	G	A	exonic	Fpr-rs4	.	nonsynonymous SNV	Fpr-rs4:NM_008041:exon1:c.G962A:p.R321K	17qA3.2
chr17	18022695	18022695	G	A	exonic	Fpr-rs4	.	synonymous SNV	Fpr-rs4:NM_008041:exon1:c.G963A:p.R321R	17qA3.2
chr17	18326403	18326403	A	C	exonic	Vmn2r93	.	nonsynonymous SNV	Vmn2r93:NM_001104542:exon6:c.A2536C:p.K846Q	17qA3.2
chr17	18440401	18440401	C	A	exonic	Vmn2r95	.	nonsynonymous SNV	Vmn2r95:NM_001102581:exon3:c.C1074A:p.F358L	17qA3.2
chr17	18597366	18597366	T	A	exonic	Vmn2r96	.	nonsynonymous SNV	Vmn2r96:NM_001104547:exon5:c.T1204A:p.L402I,Vmn2r96:NM_001385081:exon6:c.T1780A:p.L594I	17qA3.2
chr17	19379301	19379301	C	A	exonic	Vmn2r99	.	nonsynonymous SNV	Vmn2r99:NM_001104551:exon3:c.C1246A:p.Q416K	17qA3.2
chr17	19393818	19393818	T	A	exonic	Vmn2r99	.	nonsynonymous SNV	Vmn2r99:NM_001104551:exon6:c.T1799A:p.V600D	17qA3.2
chr17	19794075	19794075	C	A	exonic	Vmn2r103	.	synonymous SNV	Vmn2r103:NM_001104565:exon3:c.C1128A:p.T376T	17qA3.2
chr17	20471113	20471113	C	T	exonic	Vmn2r108	.	nonsynonymous SNV	Vmn2r108:NM_001104570:exon3:c.G1147A:p.V383M	17qA3.2
chr17	20583680	20583680	T	G	exonic	Vmn2r110	.	nonsynonymous SNV	Vmn2r110:NM_001104572:exon3:c.A632C:p.H211P	17qA3.2
chr17	20584402	20584402	A	T	exonic	Vmn2r110	.	synonymous SNV	Vmn2r110:NM_001104572:exon2:c.T255A:p.A85A	17qA3.2
chr17	20815065	20815065	C	A	exonic	Vmn1r229	.	nonsynonymous SNV	Vmn1r229:NM_134190:exon1:c.C571A:p.L191M	17qA3.2
chr17	20913838	20913838	C	A	exonic	Vmn1r232	.	nonsynonymous SNV	Vmn1r232:NM_134193:exon1:c.G499T:p.V167F	17qA3.2
chr17	21026361	21026361	T	G	exonic	Zfp160	.	nonsynonymous SNV	Zfp160:NM_145483:exon5:c.T1172G:p.V391G	17qA3.2
chr17	22689871	22689871	A	G	exonic	Gm9805	.	nonsynonymous SNV	Gm9805:NM_001362121:exon5:c.A1127G:p.Y376C,Gm9805:NM_001377043:exon5:c.A1127G:p.Y376C	17qA3.3
chr17	23290950	23290950	C	T	exonic	Vmn2r114	.	nonsynonymous SNV	Vmn2r114:NM_001102584:exon6:c.G2555A:p.R852H	17qA3.3
chr17	23290965	23290965	G	A	exonic	Vmn2r114	.	nonsynonymous SNV	Vmn2r114:NM_001102584:exon6:c.C2540T:p.A847V	17qA3.3
chr17	23290983	23290983	G	T	exonic	Vmn2r114	.	nonsynonymous SNV	Vmn2r114:NM_001102584:exon6:c.C2522A:p.S841Y	17qA3.3
chr17	23291150	23291150	C	A	exonic	Vmn2r114	.	synonymous SNV	Vmn2r114:NM_001102584:exon6:c.G2355T:p.L785L	17qA3.3
chr17	23291197	23291197	G	A	exonic	Vmn2r114	.	nonsynonymous SNV	Vmn2r114:NM_001102584:exon6:c.C2308T:p.L770F	17qA3.3
chr17	23291238	23291238	A	T	exonic	Vmn2r114	.	nonsynonymous SNV	Vmn2r114:NM_001102584:exon6:c.T2267A:p.L756Q	17qA3.3
chr17	23291281	23291281	A	T	exonic	Vmn2r114	.	nonsynonymous SNV	Vmn2r114:NM_001102584:exon6:c.T2224A:p.S742T	17qA3.3
chr17	23291283	23291283	C	T	exonic	Vmn2r114	.	nonsynonymous SNV	Vmn2r114:NM_001102584:exon6:c.G2222A:p.G741D	17qA3.3
chr17	23291285	23291285	T	C	exonic	Vmn2r114	.	synonymous SNV	Vmn2r114:NM_001102584:exon6:c.A2220G:p.K740K	17qA3.3
chr17	23291321	23291321	A	C	exonic	Vmn2r114	.	nonsynonymous SNV	Vmn2r114:NM_001102584:exon6:c.T2184G:p.H728Q	17qA3.3
chr17	23291322	23291322	T	A	exonic	Vmn2r114	.	nonsynonymous SNV	Vmn2r114:NM_001102584:exon6:c.A2183T:p.H728L	17qA3.3
chr17	23291338	23291338	C	A	exonic	Vmn2r114	.	nonsynonymous SNV	Vmn2r114:NM_001102584:exon6:c.G2167T:p.V723F	17qA3.3
chr17	23291353	23291353	C	G	exonic	Vmn2r114	.	nonsynonymous SNV	Vmn2r114:NM_001102584:exon6:c.G2152C:p.A718P	17qA3.3
chr17	23291365	23291365	C	T	exonic	Vmn2r114	.	nonsynonymous SNV	Vmn2r114:NM_001102584:exon6:c.G2140A:p.V714I	17qA3.3
chr17	23291369	23291369	A	T	exonic	Vmn2r114	.	stopgain	Vmn2r114:NM_001102584:exon6:c.T2136A:p.C712X	17qA3.3
chr17	23291398	23291398	A	T	exonic	Vmn2r114	.	nonsynonymous SNV	Vmn2r114:NM_001102584:exon6:c.T2107A:p.F703I	17qA3.3
chr17	23291424	23291424	G	C	exonic	Vmn2r114	.	stopgain	Vmn2r114:NM_001102584:exon6:c.C2081G:p.S694X	17qA3.3
chr17	23291435	23291435	G	T	exonic	Vmn2r114	.	stopgain	Vmn2r114:NM_001102584:exon6:c.C2070A:p.Y690X	17qA3.3
chr17	23291489	23291489	C	T	exonic	Vmn2r114	.	synonymous SNV	Vmn2r114:NM_001102584:exon6:c.G2016A:p.T672T	17qA3.3
chr17	23291529	23291529	A	G	exonic	Vmn2r114	.	nonsynonymous SNV	Vmn2r114:NM_001102584:exon6:c.T1976C:p.V659A	17qA3.3
chr17	23291530	23291530	C	T	exonic	Vmn2r114	.	nonsynonymous SNV	Vmn2r114:NM_001102584:exon6:c.G1975A:p.V659I	17qA3.3
chr17	23291539	23291539	T	C	exonic	Vmn2r114	.	nonsynonymous SNV	Vmn2r114:NM_001102584:exon6:c.A1966G:p.T656A	17qA3.3
chr17	23291609	23291609	A	G	exonic	Vmn2r114	.	synonymous SNV	Vmn2r114:NM_001102584:exon6:c.T1896C:p.I632I	17qA3.3
chr17	23291645	23291645	G	C	exonic	Vmn2r114	.	nonsynonymous SNV	Vmn2r114:NM_001102584:exon6:c.C1860G:p.N620K	17qA3.3
chr17	23291665	23291665	G	A	exonic	Vmn2r114	.	nonsynonymous SNV	Vmn2r114:NM_001102584:exon6:c.C1840T:p.P614S	17qA3.3
chr17	23291747	23291747	C	A	exonic	Vmn2r114	.	synonymous SNV	Vmn2r114:NM_001102584:exon6:c.G1758T:p.G586G	17qA3.3
chr17	23291750	23291750	T	C	exonic	Vmn2r114	.	synonymous SNV	Vmn2r114:NM_001102584:exon6:c.A1755G:p.L585L	17qA3.3
chr17	23291752	23291752	A	G	exonic	Vmn2r114	.	synonymous SNV	Vmn2r114:NM_001102584:exon6:c.T1753C:p.L585L	17qA3.3
chr17	23291755	23291755	G	A	exonic	Vmn2r114	.	nonsynonymous SNV	Vmn2r114:NM_001102584:exon6:c.C1750T:p.P584S	17qA3.3
chr17	23291765	23291765	G	A	exonic	Vmn2r114	.	synonymous SNV	Vmn2r114:NM_001102584:exon6:c.C1740T:p.S580S	17qA3.3
chr17	23291782	23291782	T	C	exonic	Vmn2r114	.	nonsynonymous SNV	Vmn2r114:NM_001102584:exon6:c.A1723G:p.T575A	17qA3.3
chr17	23291787	23291787	C	T	exonic	Vmn2r114	.	nonsynonymous SNV	Vmn2r114:NM_001102584:exon6:c.G1718A:p.R573H	17qA3.3
chr17	23291807	23291807	T	A	exonic	Vmn2r114	.	synonymous SNV	Vmn2r114:NM_001102584:exon6:c.A1698T:p.T566T	17qA3.3
chr17	23291821	23291821	G	T	exonic	Vmn2r114	.	nonsynonymous SNV	Vmn2r114:NM_001102584:exon6:c.C1684A:p.Q562K	17qA3.3
chr17	23291829	23291829	A	G	exonic	Vmn2r114	.	nonsynonymous SNV	Vmn2r114:NM_001102584:exon6:c.T1676C:p.L559P	17qA3.3
chr17	23291838	23291838	A	G	exonic	Vmn2r114	.	nonsynonymous SNV	Vmn2r114:NM_001102584:exon6:c.T1667C:p.V556A	17qA3.3
chr17	23291839	23291839	C	A	exonic	Vmn2r114	.	nonsynonymous SNV	Vmn2r114:NM_001102584:exon6:c.G1666T:p.V556F	17qA3.3
chr17	23291841	23291841	C	A	exonic	Vmn2r114	.	nonsynonymous SNV	Vmn2r114:NM_001102584:exon6:c.G1664T:p.C555F	17qA3.3
chr17	23308078	23308078	T	C	exonic	Vmn2r114	.	synonymous SNV	Vmn2r114:NM_001102584:exon4:c.A1479G:p.Q493Q	17qA3.3
chr17	23308096	23308096	G	A	exonic	Vmn2r114	.	synonymous SNV	Vmn2r114:NM_001102584:exon4:c.C1461T:p.Y487Y	17qA3.3
chr17	23308117	23308117	T	G	exonic	Vmn2r114	.	nonsynonymous SNV	Vmn2r114:NM_001102584:exon4:c.A1440C:p.K480N	17qA3.3
chr17	23308130	23308130	T	C	exonic	Vmn2r114	.	nonsynonymous SNV	Vmn2r114:NM_001102584:exon4:c.A1427G:p.E476G	17qA3.3
chr17	23308175	23308175	T	A	exonic	Vmn2r114	.	nonsynonymous SNV	Vmn2r114:NM_001102584:exon4:c.A1382T:p.E461V	17qA3.3
chr17	23308177	23308177	C	T	exonic	Vmn2r114	.	synonymous SNV	Vmn2r114:NM_001102584:exon4:c.G1380A:p.Q460Q	17qA3.3
chr17	23308202	23308202	T	C	exonic	Vmn2r114	.	nonsynonymous SNV	Vmn2r114:NM_001102584:exon4:c.A1355G:p.N452S	17qA3.3
chr17	23308209	23308209	T	A	exonic	Vmn2r114	.	stopgain	Vmn2r114:NM_001102584:exon4:c.A1348T:p.R450X	17qA3.3
chr17	23308219	23308219	C	A	exonic	Vmn2r114	.	synonymous SNV	Vmn2r114:NM_001102584:exon4:c.G1338T:p.P446P	17qA3.3
chr17	23308231	23308231	C	G	exonic	Vmn2r114	.	nonsynonymous SNV	Vmn2r114:NM_001102584:exon4:c.G1326C:p.Q442H	17qA3.3
chr17	23308234	23308234	G	A	exonic	Vmn2r114	.	synonymous SNV	Vmn2r114:NM_001102584:exon4:c.C1323T:p.T441T	17qA3.3
chr17	23311032	23311032	G	A	exonic	Vmn2r114	.	nonsynonymous SNV	Vmn2r114:NM_001102584:exon2:c.C400T:p.L134F	17qA3.3
chr17	23311042	23311042	C	G	exonic	Vmn2r114	.	nonsynonymous SNV	Vmn2r114:NM_001102584:exon2:c.G390C:p.M130I	17qA3.3
chr17	23311052	23311052	G	A	exonic	Vmn2r114	.	nonsynonymous SNV	Vmn2r114:NM_001102584:exon2:c.C380T:p.P127L	17qA3.3
chr17	23311071	23311071	G	A	exonic	Vmn2r114	.	stopgain	Vmn2r114:NM_001102584:exon2:c.C361T:p.Q121X	17qA3.3
chr17	23311081	23311081	G	A	exonic	Vmn2r114	.	synonymous SNV	Vmn2r114:NM_001102584:exon2:c.C351T:p.H117H	17qA3.3
chr17	23345068	23345068	C	T	exonic	Vmn2r115	.	synonymous SNV	Vmn2r115:NM_001104579:exon2:c.C213T:p.N71N	17qA3.3
chr17	23345107	23345107	A	G	exonic	Vmn2r115	.	synonymous SNV	Vmn2r115:NM_001104579:exon2:c.A252G:p.E84E	17qA3.3
chr17	23345115	23345115	T	G	exonic	Vmn2r115	.	nonsynonymous SNV	Vmn2r115:NM_001104579:exon2:c.T260G:p.M87R	17qA3.3
chr17	23345153	23345153	G	A	exonic	Vmn2r115	.	nonsynonymous SNV	Vmn2r115:NM_001104579:exon2:c.G298A:p.E100K	17qA3.3
chr17	23345154	23345154	A	C	exonic	Vmn2r115	.	nonsynonymous SNV	Vmn2r115:NM_001104579:exon2:c.A299C:p.E100A	17qA3.3
chr17	23345156	23345156	T	C	exonic	Vmn2r115	.	nonsynonymous SNV	Vmn2r115:NM_001104579:exon2:c.T301C:p.F101L	17qA3.3
chr17	23345163	23345163	T	A	exonic	Vmn2r115	.	nonsynonymous SNV	Vmn2r115:NM_001104579:exon2:c.T308A:p.V103E	17qA3.3
chr17	23345165	23345165	C	T	exonic	Vmn2r115	.	nonsynonymous SNV	Vmn2r115:NM_001104579:exon2:c.C310T:p.H104Y	17qA3.3
chr17	23346116	23346116	C	T	exonic	Vmn2r115	.	nonsynonymous SNV	Vmn2r115:NM_001104579:exon3:c.C976T:p.H326Y	17qA3.3
chr17	23346117	23346117	A	G	exonic	Vmn2r115	.	nonsynonymous SNV	Vmn2r115:NM_001104579:exon3:c.A977G:p.H326R	17qA3.3
chr17	23346206	23346206	A	T	exonic	Vmn2r115	.	nonsynonymous SNV	Vmn2r115:NM_001104579:exon3:c.A1066T:p.M356L	17qA3.3
chr17	23346227	23346227	T	C	exonic	Vmn2r115	.	nonsynonymous SNV	Vmn2r115:NM_001104579:exon3:c.T1087C:p.S363P	17qA3.3
chr17	23346261	23346261	C	G	exonic	Vmn2r115	.	stopgain	Vmn2r115:NM_001104579:exon3:c.C1121G:p.S374X	17qA3.3
chr17	23346264	23346264	C	T	exonic	Vmn2r115	.	nonsynonymous SNV	Vmn2r115:NM_001104579:exon3:c.C1124T:p.S375F	17qA3.3
chr17	23346265	23346265	C	A	exonic	Vmn2r115	.	synonymous SNV	Vmn2r115:NM_001104579:exon3:c.C1125A:p.S375S	17qA3.3
chr17	23346278	23346278	G	A	exonic	Vmn2r115	.	nonsynonymous SNV	Vmn2r115:NM_001104579:exon3:c.G1138A:p.E380K	17qA3.3
chr17	23346288	23346288	T	C	exonic	Vmn2r115	.	nonsynonymous SNV	Vmn2r115:NM_001104579:exon3:c.T1148C:p.M383T	17qA3.3
chr17	23346339	23346339	A	C	exonic	Vmn2r115	.	nonsynonymous SNV	Vmn2r115:NM_001104579:exon3:c.A1199C:p.N400T	17qA3.3
chr17	23346346	23346346	T	G	exonic	Vmn2r115	.	synonymous SNV	Vmn2r115:NM_001104579:exon3:c.T1206G:p.V402V	17qA3.3
chr17	23346362	23346362	G	A	exonic	Vmn2r115	.	nonsynonymous SNV	Vmn2r115:NM_001104579:exon3:c.G1222A:p.A408T	17qA3.3
chr17	23346371	23346371	C	T	exonic	Vmn2r115	.	stopgain	Vmn2r115:NM_001104579:exon3:c.C1231T:p.Q411X	17qA3.3
chr17	23346372	23346372	A	G	exonic	Vmn2r115	.	nonsynonymous SNV	Vmn2r115:NM_001104579:exon3:c.A1232G:p.Q411R	17qA3.3
chr17	23346389	23346389	T	A	exonic	Vmn2r115	.	nonsynonymous SNV	Vmn2r115:NM_001104579:exon3:c.T1249A:p.F417I	17qA3.3
chr17	23346438	23346438	A	G	exonic	Vmn2r115	.	nonsynonymous SNV	Vmn2r115:NM_001104579:exon3:c.A1298G:p.K433R	17qA3.3
chr17	23347825	23347825	C	T	exonic	Vmn2r115	.	nonsynonymous SNV	Vmn2r115:NM_001104579:exon4:c.C1310T:p.S437F	17qA3.3
chr17	23347841	23347841	C	T	exonic	Vmn2r115	.	synonymous SNV	Vmn2r115:NM_001104579:exon4:c.C1326T:p.T442T	17qA3.3
chr17	23347844	23347844	G	C	exonic	Vmn2r115	.	nonsynonymous SNV	Vmn2r115:NM_001104579:exon4:c.G1329C:p.Q443H	17qA3.3
chr17	23347849	23347849	T	C	exonic	Vmn2r115	.	nonsynonymous SNV	Vmn2r115:NM_001104579:exon4:c.T1334C:p.I445T	17qA3.3
chr17	23347866	23347866	A	T	exonic	Vmn2r115	.	stopgain	Vmn2r115:NM_001104579:exon4:c.A1351T:p.R451X	17qA3.3
chr17	23347873	23347873	A	G	exonic	Vmn2r115	.	nonsynonymous SNV	Vmn2r115:NM_001104579:exon4:c.A1358G:p.N453S	17qA3.3
chr17	23347898	23347898	G	A	exonic	Vmn2r115	.	synonymous SNV	Vmn2r115:NM_001104579:exon4:c.G1383A:p.Q461Q	17qA3.3
chr17	23347900	23347900	A	T	exonic	Vmn2r115	.	nonsynonymous SNV	Vmn2r115:NM_001104579:exon4:c.A1385T:p.E462V	17qA3.3
chr17	23347937	23347937	T	G	exonic	Vmn2r115	.	nonsynonymous SNV	Vmn2r115:NM_001104579:exon4:c.T1422G:p.H474Q	17qA3.3
chr17	23347947	23347947	T	C	exonic	Vmn2r115	.	nonsynonymous SNV	Vmn2r115:NM_001104579:exon4:c.T1432C:p.F478L	17qA3.3
chr17	23347951	23347951	A	G	exonic	Vmn2r115	.	nonsynonymous SNV	Vmn2r115:NM_001104579:exon4:c.A1436G:p.K479R	17qA3.3
chr17	23347958	23347958	A	C	exonic	Vmn2r115	.	nonsynonymous SNV	Vmn2r115:NM_001104579:exon4:c.A1443C:p.K481N	17qA3.3
chr17	23347964	23347964	G	A	exonic	Vmn2r115	.	synonymous SNV	Vmn2r115:NM_001104579:exon4:c.G1449A:p.G483G	17qA3.3
chr17	23347967	23347967	A	G	exonic	Vmn2r115	.	nonsynonymous SNV	Vmn2r115:NM_001104579:exon4:c.A1452G:p.I484M	17qA3.3
chr17	23348005	23348005	T	C	exonic	Vmn2r115	.	nonsynonymous SNV	Vmn2r115:NM_001104579:exon4:c.T1490C:p.L497S	17qA3.3
chr17	23348034	23348034	G	T	exonic	Vmn2r115	.	stopgain	Vmn2r115:NM_001104579:exon4:c.G1519T:p.G507X	17qA3.3
chr17	23348040	23348040	G	A	exonic	Vmn2r115	.	nonsynonymous SNV	Vmn2r115:NM_001104579:exon4:c.G1525A:p.A509T	17qA3.3
chr17	23356960	23356960	A	G	exonic	Vmn2r115	.	nonsynonymous SNV	Vmn2r115:NM_001104579:exon5:c.A1531G:p.M511V	17qA3.3
chr17	23356971	23356971	A	G	exonic	Vmn2r115	.	synonymous SNV	Vmn2r115:NM_001104579:exon5:c.A1542G:p.S514S	17qA3.3
chr17	23357014	23357014	A	G	exonic	Vmn2r115	.	nonsynonymous SNV	Vmn2r115:NM_001104579:exon5:c.A1585G:p.M529V	17qA3.3
chr17	23357016	23357016	G	A	exonic	Vmn2r115	.	nonsynonymous SNV	Vmn2r115:NM_001104579:exon5:c.G1587A:p.M529I	17qA3.3
chr17	23357019	23357019	C	T	exonic	Vmn2r115	.	synonymous SNV	Vmn2r115:NM_001104579:exon5:c.C1590T:p.D530D	17qA3.3
chr17	23357050	23357050	C	T	exonic	Vmn2r115	.	nonsynonymous SNV	Vmn2r115:NM_001104579:exon5:c.C1621T:p.P541S	17qA3.3
chr17	23357052	23357052	T	C	exonic	Vmn2r115	.	synonymous SNV	Vmn2r115:NM_001104579:exon5:c.T1623C:p.P541P	17qA3.3
chr17	23357055	23357055	T	C	exonic	Vmn2r115	.	synonymous SNV	Vmn2r115:NM_001104579:exon5:c.T1626C:p.C542C	17qA3.3
chr17	23357076	23357076	C	T	exonic	Vmn2r115	.	synonymous SNV	Vmn2r115:NM_001104579:exon5:c.C1647T:p.N549N	17qA3.3
chr17	23357077	23357077	G	A	exonic	Vmn2r115	.	nonsynonymous SNV	Vmn2r115:NM_001104579:exon5:c.G1648A:p.E550K	17qA3.3
chr17	23359221	23359221	G	T	exonic	Vmn2r115	.	nonsynonymous SNV	Vmn2r115:NM_001104579:exon6:c.G1667T:p.C556F	17qA3.3
chr17	23359223	23359223	G	T	exonic	Vmn2r115	.	nonsynonymous SNV	Vmn2r115:NM_001104579:exon6:c.G1669T:p.V557F	17qA3.3
chr17	23359224	23359224	T	C	exonic	Vmn2r115	.	nonsynonymous SNV	Vmn2r115:NM_001104579:exon6:c.T1670C:p.V557A	17qA3.3
chr17	23359233	23359233	T	C	exonic	Vmn2r115	.	nonsynonymous SNV	Vmn2r115:NM_001104579:exon6:c.T1679C:p.L560P	17qA3.3
chr17	23359241	23359241	C	A	exonic	Vmn2r115	.	nonsynonymous SNV	Vmn2r115:NM_001104579:exon6:c.C1687A:p.Q563K	17qA3.3
chr17	23359255	23359255	A	T	exonic	Vmn2r115	.	synonymous SNV	Vmn2r115:NM_001104579:exon6:c.A1701T:p.T567T	17qA3.3
chr17	23359268	23359268	T	C	exonic	Vmn2r115	.	nonsynonymous SNV	Vmn2r115:NM_001104579:exon6:c.T1714C:p.C572R	17qA3.3
chr17	23359275	23359275	G	A	exonic	Vmn2r115	.	nonsynonymous SNV	Vmn2r115:NM_001104579:exon6:c.G1721A:p.R574H	17qA3.3
chr17	23359280	23359280	A	G	exonic	Vmn2r115	.	nonsynonymous SNV	Vmn2r115:NM_001104579:exon6:c.A1726G:p.I576V	17qA3.3
chr17	23359281	23359281	T	C	exonic	Vmn2r115	.	nonsynonymous SNV	Vmn2r115:NM_001104579:exon6:c.T1727C:p.I576T	17qA3.3
chr17	23359297	23359297	C	T	exonic	Vmn2r115	.	synonymous SNV	Vmn2r115:NM_001104579:exon6:c.C1743T:p.S581S	17qA3.3
chr17	23359307	23359307	C	T	exonic	Vmn2r115	.	nonsynonymous SNV	Vmn2r115:NM_001104579:exon6:c.C1753T:p.P585S	17qA3.3
chr17	23359310	23359310	T	C	exonic	Vmn2r115	.	synonymous SNV	Vmn2r115:NM_001104579:exon6:c.T1756C:p.L586L	17qA3.3
chr17	23359315	23359315	G	T	exonic	Vmn2r115	.	synonymous SNV	Vmn2r115:NM_001104579:exon6:c.G1761T:p.G587G	17qA3.3
chr17	23359326	23359326	C	T	exonic	Vmn2r115	.	nonsynonymous SNV	Vmn2r115:NM_001104579:exon6:c.C1772T:p.S591F	17qA3.3
chr17	23359349	23359349	G	T	exonic	Vmn2r115	.	nonsynonymous SNV	Vmn2r115:NM_001104579:exon6:c.G1795T:p.A599S	17qA3.3
chr17	23359359	23359359	T	C	exonic	Vmn2r115	.	nonsynonymous SNV	Vmn2r115:NM_001104579:exon6:c.T1805C:p.I602T	17qA3.3
chr17	23359397	23359397	C	T	exonic	Vmn2r115	.	nonsynonymous SNV	Vmn2r115:NM_001104579:exon6:c.C1843T:p.P615S	17qA3.3
chr17	23359417	23359417	C	G	exonic	Vmn2r115	.	nonsynonymous SNV	Vmn2r115:NM_001104579:exon6:c.C1863G:p.N621K	17qA3.3
chr17	23359450	23359450	A	C	exonic	Vmn2r115	.	synonymous SNV	Vmn2r115:NM_001104579:exon6:c.A1896C:p.L632L	17qA3.3
chr17	23359533	23359533	T	C	exonic	Vmn2r115	.	nonsynonymous SNV	Vmn2r115:NM_001104579:exon6:c.T1979C:p.I660T	17qA3.3
chr17	23359638	23359638	C	G	exonic	Vmn2r115	.	stopgain	Vmn2r115:NM_001104579:exon6:c.C2084G:p.S695X	17qA3.3
chr17	23359737	23359737	G	C	exonic	Vmn2r115	.	nonsynonymous SNV	Vmn2r115:NM_001104579:exon6:c.G2183C:p.G728A	17qA3.3
chr17	23359740	23359740	A	T	exonic	Vmn2r115	.	nonsynonymous SNV	Vmn2r115:NM_001104579:exon6:c.A2186T:p.Q729L	17qA3.3
chr17	23359741	23359741	A	G	exonic	Vmn2r115	.	synonymous SNV	Vmn2r115:NM_001104579:exon6:c.A2187G:p.Q729Q	17qA3.3
chr17	23359779	23359779	G	A	exonic	Vmn2r115	.	nonsynonymous SNV	Vmn2r115:NM_001104579:exon6:c.G2225A:p.G742D	17qA3.3
chr17	23359865	23359865	C	T	exonic	Vmn2r115	.	nonsynonymous SNV	Vmn2r115:NM_001104579:exon6:c.C2311T:p.L771F	17qA3.3
chr17	23359888	23359888	T	C	exonic	Vmn2r115	.	synonymous SNV	Vmn2r115:NM_001104579:exon6:c.T2334C:p.A778A	17qA3.3
chr17	23359912	23359912	G	T	exonic	Vmn2r115	.	synonymous SNV	Vmn2r115:NM_001104579:exon6:c.G2358T:p.L786L	17qA3.3
chr17	23359933	23359933	C	T	exonic	Vmn2r115	.	synonymous SNV	Vmn2r115:NM_001104579:exon6:c.C2379T:p.V793V	17qA3.3
chr17	23359942	23359942	C	A	exonic	Vmn2r115	.	synonymous SNV	Vmn2r115:NM_001104579:exon6:c.C2388A:p.I796I	17qA3.3
chr17	23359956	23359956	G	A	exonic	Vmn2r115	.	nonsynonymous SNV	Vmn2r115:NM_001104579:exon6:c.G2402A:p.S801N	17qA3.3
chr17	23359984	23359984	G	A	exonic	Vmn2r115	.	synonymous SNV	Vmn2r115:NM_001104579:exon6:c.G2430A:p.V810V	17qA3.3
chr17	23360006	23360006	T	A	exonic	Vmn2r115	.	nonsynonymous SNV	Vmn2r115:NM_001104579:exon6:c.T2452A:p.S818T	17qA3.3
chr17	23360025	23360025	G	A	exonic	Vmn2r115	.	nonsynonymous SNV	Vmn2r115:NM_001104579:exon6:c.G2471A:p.G824E	17qA3.3
chr17	23360079	23360079	C	A	exonic	Vmn2r115	.	nonsynonymous SNV	Vmn2r115:NM_001104579:exon6:c.C2525A:p.S842Y	17qA3.3
chr17	23360111	23360111	A	C	exonic	Vmn2r115	.	nonsynonymous SNV	Vmn2r115:NM_001104579:exon6:c.A2557C:p.N853H	17qA3.3
chr17	23360118	23360118	G	A	exonic	Vmn2r115	.	nonsynonymous SNV	Vmn2r115:NM_001104579:exon6:c.G2564A:p.R855H	17qA3.3
chr17	23360121	23360121	G	T	exonic	Vmn2r115	.	nonsynonymous SNV	Vmn2r115:NM_001104579:exon6:c.G2567T:p.S856I	17qA3.3
chr17	23460165	23460165	G	C	exonic	Vmn2r117	.	stopgain	Vmn2r117:NM_001104581:exon6:c.C2084G:p.S695X	17qA3.3
chr17	23460176	23460176	G	T	exonic	Vmn2r117	.	stopgain	Vmn2r117:NM_001104581:exon6:c.C2073A:p.Y691X	17qA3.3
chr17	23460230	23460230	C	T	exonic	Vmn2r117	.	synonymous SNV	Vmn2r117:NM_001104581:exon6:c.G2019A:p.T673T	17qA3.3
chr17	23460271	23460271	C	T	exonic	Vmn2r117	.	nonsynonymous SNV	Vmn2r117:NM_001104581:exon6:c.G1978A:p.V660I	17qA3.3
chr17	23460280	23460280	T	C	exonic	Vmn2r117	.	nonsynonymous SNV	Vmn2r117:NM_001104581:exon6:c.A1969G:p.T657A	17qA3.3
chr17	23460293	23460293	A	G	exonic	Vmn2r117	.	synonymous SNV	Vmn2r117:NM_001104581:exon6:c.T1956C:p.I652I	17qA3.3
chr17	23471184	23471184	G	A	exonic	Vmn2r117	.	synonymous SNV	Vmn2r117:NM_001104581:exon5:c.C1647T:p.N549N	17qA3.3
chr17	23471205	23471205	A	G	exonic	Vmn2r117	.	synonymous SNV	Vmn2r117:NM_001104581:exon5:c.T1626C:p.C542C	17qA3.3
chr17	23471210	23471210	G	A	exonic	Vmn2r117	.	nonsynonymous SNV	Vmn2r117:NM_001104581:exon5:c.C1621T:p.P541S	17qA3.3
chr17	23471241	23471241	G	A	exonic	Vmn2r117	.	synonymous SNV	Vmn2r117:NM_001104581:exon5:c.C1590T:p.D530D	17qA3.3
chr17	23471274	23471274	T	A	exonic	Vmn2r117	.	nonsynonymous SNV	Vmn2r117:NM_001104581:exon5:c.A1557T:p.E519D	17qA3.3
chr17	23475347	23475347	C	T	exonic	Vmn2r117	.	nonsynonymous SNV	Vmn2r117:NM_001104581:exon4:c.G1525A:p.A509T	17qA3.3
chr17	23475353	23475353	C	A	exonic	Vmn2r117	.	stopgain	Vmn2r117:NM_001104581:exon4:c.G1519T:p.G507X	17qA3.3
chr17	23475382	23475382	A	G	exonic	Vmn2r117	.	nonsynonymous SNV	Vmn2r117:NM_001104581:exon4:c.T1490C:p.L497S	17qA3.3
chr17	23475408	23475408	G	A	exonic	Vmn2r117	.	synonymous SNV	Vmn2r117:NM_001104581:exon4:c.C1464T:p.Y488Y	17qA3.3
chr17	23475429	23475429	T	G	exonic	Vmn2r117	.	nonsynonymous SNV	Vmn2r117:NM_001104581:exon4:c.A1443C:p.K481N	17qA3.3
chr17	23477616	23477616	G	A	exonic	Vmn2r117	.	synonymous SNV	Vmn2r117:NM_001104581:exon3:c.C816T:p.I272I	17qA3.3
chr17	23477618	23477618	T	A	exonic	Vmn2r117	.	nonsynonymous SNV	Vmn2r117:NM_001104581:exon3:c.A814T:p.I272F	17qA3.3
chr17	23477689	23477689	C	T	exonic	Vmn2r117	.	nonsynonymous SNV	Vmn2r117:NM_001104581:exon3:c.G743A:p.S248N	17qA3.3
chr17	23477691	23477691	C	T	exonic	Vmn2r117	.	nonsynonymous SNV	Vmn2r117:NM_001104581:exon3:c.G741A:p.M247I	17qA3.3
chr17	23477695	23477695	G	A	exonic	Vmn2r117	.	nonsynonymous SNV	Vmn2r117:NM_001104581:exon3:c.C737T:p.P246L	17qA3.3
chr17	23477705	23477705	T	C	exonic	Vmn2r117	.	nonsynonymous SNV	Vmn2r117:NM_001104581:exon3:c.A727G:p.N243D	17qA3.3
chr17	23477712	23477712	G	A	exonic	Vmn2r117	.	synonymous SNV	Vmn2r117:NM_001104581:exon3:c.C720T:p.A240A	17qA3.3
chr17	23477713	23477713	G	A	exonic	Vmn2r117	.	nonsynonymous SNV	Vmn2r117:NM_001104581:exon3:c.C719T:p.A240V	17qA3.3
chr17	23477723	23477723	C	G	exonic	Vmn2r117	.	nonsynonymous SNV	Vmn2r117:NM_001104581:exon3:c.G709C:p.V237L	17qA3.3
chr17	23477770	23477770	T	C	exonic	Vmn2r117	.	nonsynonymous SNV	Vmn2r117:NM_001104581:exon3:c.A662G:p.D221G	17qA3.3
chr17	23477773	23477773	T	C	exonic	Vmn2r117	.	nonsynonymous SNV	Vmn2r117:NM_001104581:exon3:c.A659G:p.E220G	17qA3.3
chr17	23477781	23477781	G	A	exonic	Vmn2r117	.	synonymous SNV	Vmn2r117:NM_001104581:exon3:c.C651T:p.D217D	17qA3.3
chr17	23477804	23477804	A	G	exonic	Vmn2r117	.	nonsynonymous SNV	Vmn2r117:NM_001104581:exon3:c.T628C:p.W210R	17qA3.3
chr17	23477811	23477811	A	G	exonic	Vmn2r117	.	synonymous SNV	Vmn2r117:NM_001104581:exon3:c.T621C:p.S207S	17qA3.3
chr17	23477837	23477837	G	A	exonic	Vmn2r117	.	synonymous SNV	Vmn2r117:NM_001104581:exon3:c.C595T:p.L199L	17qA3.3
chr17	23477840	23477840	C	T	exonic	Vmn2r117	.	nonsynonymous SNV	Vmn2r117:NM_001104581:exon3:c.G592A:p.A198T	17qA3.3
chr17	23477858	23477858	G	A	exonic	Vmn2r117	.	nonsynonymous SNV	Vmn2r117:NM_001104581:exon3:c.C574T:p.H192Y	17qA3.3
chr17	23478268	23478268	A	T	exonic	Vmn2r117	.	nonsynonymous SNV	Vmn2r117:NM_001104581:exon2:c.T449A:p.V150E	17qA3.3
chr17	23478305	23478305	C	T	exonic	Vmn2r117	.	nonsynonymous SNV	Vmn2r117:NM_001104581:exon2:c.G412A:p.A138T	17qA3.3
chr17	23478310	23478310	T	C	exonic	Vmn2r117	.	nonsynonymous SNV	Vmn2r117:NM_001104581:exon2:c.A407G:p.K136R	17qA3.3
chr17	23478327	23478327	C	G	exonic	Vmn2r117	.	nonsynonymous SNV	Vmn2r117:NM_001104581:exon2:c.G390C:p.M130I	17qA3.3
chr17	23478337	23478337	G	A	exonic	Vmn2r117	.	nonsynonymous SNV	Vmn2r117:NM_001104581:exon2:c.C380T:p.P127L	17qA3.3
chr17	23478356	23478356	G	A	exonic	Vmn2r117	.	stopgain	Vmn2r117:NM_001104581:exon2:c.C361T:p.Q121X	17qA3.3
chr17	23478374	23478374	A	G	exonic	Vmn2r117	.	nonsynonymous SNV	Vmn2r117:NM_001104581:exon2:c.T343C:p.F115L	17qA3.3
chr17	23478504	23478504	G	A	exonic	Vmn2r117	.	synonymous SNV	Vmn2r117:NM_001104581:exon2:c.C213T:p.N71N	17qA3.3
chr17	23479401	23479401	T	C	exonic	Vmn2r117	.	nonsynonymous SNV	Vmn2r117:NM_001104581:exon1:c.A197G:p.Q66R	17qA3.3
chr17	23479402	23479402	G	A	exonic	Vmn2r117	.	stopgain	Vmn2r117:NM_001104581:exon1:c.C196T:p.Q66X	17qA3.3
chr17	23479412	23479412	T	A	exonic	Vmn2r117	.	synonymous SNV	Vmn2r117:NM_001104581:exon1:c.A186T:p.I62I	17qA3.3
chr17	23479419	23479419	C	T	exonic	Vmn2r117	.	nonsynonymous SNV	Vmn2r117:NM_001104581:exon1:c.G179A:p.S60N	17qA3.3
chr17	23479427	23479427	C	T	exonic	Vmn2r117	.	synonymous SNV	Vmn2r117:NM_001104581:exon1:c.G171A:p.E57E	17qA3.3
chr17	23479442	23479442	C	A	exonic	Vmn2r117	.	synonymous SNV	Vmn2r117:NM_001104581:exon1:c.G156T:p.R52R	17qA3.3
chr17	23479444	23479444	G	A	exonic	Vmn2r117	.	nonsynonymous SNV	Vmn2r117:NM_001104581:exon1:c.C154T:p.R52W	17qA3.3
chr17	23479447	23479447	G	T	exonic	Vmn2r117	.	nonsynonymous SNV	Vmn2r117:NM_001104581:exon1:c.C151A:p.Q51K	17qA3.3
chr17	23479456	23479456	G	A	exonic	Vmn2r117	.	nonsynonymous SNV	Vmn2r117:NM_001104581:exon1:c.C142T:p.H48Y	17qA3.3
chr17	23479461	23479461	A	C	exonic	Vmn2r117	.	nonsynonymous SNV	Vmn2r117:NM_001104581:exon1:c.T137G:p.M46R	17qA3.3
chr17	23479462	23479462	T	A	exonic	Vmn2r117	.	nonsynonymous SNV	Vmn2r117:NM_001104581:exon1:c.A136T:p.M46L	17qA3.3
chr17	23479469	23479469	G	T	exonic	Vmn2r117	.	stopgain	Vmn2r117:NM_001104581:exon1:c.C129A:p.C43X	17qA3.3
chr17	23479470	23479470	C	A	exonic	Vmn2r117	.	nonsynonymous SNV	Vmn2r117:NM_001104581:exon1:c.G128T:p.C43F	17qA3.3
chr17	23479481	23479481	C	T	exonic	Vmn2r117	.	synonymous SNV	Vmn2r117:NM_001104581:exon1:c.G117A:p.Q39Q	17qA3.3
chr17	23479483	23479483	G	T	exonic	Vmn2r117	.	nonsynonymous SNV	Vmn2r117:NM_001104581:exon1:c.C115A:p.Q39K	17qA3.3
chr17	23479497	23479497	T	A	exonic	Vmn2r117	.	nonsynonymous SNV	Vmn2r117:NM_001104581:exon1:c.A101T:p.D34V	17qA3.3
chr17	23479505	23479505	C	G	exonic	Vmn2r117	.	nonsynonymous SNV	Vmn2r117:NM_001104581:exon1:c.G93C:p.Q31H	17qA3.3
chr17	23479523	23479523	G	T	exonic	Vmn2r117	.	stopgain	Vmn2r117:NM_001104581:exon1:c.C75A:p.C25X	17qA3.3
chr17	23479544	23479544	A	T	exonic	Vmn2r117	.	synonymous SNV	Vmn2r117:NM_001104581:exon1:c.T54A:p.S18S	17qA3.3
chr17	23479546	23479546	A	C	exonic	Vmn2r117	.	nonsynonymous SNV	Vmn2r117:NM_001104581:exon1:c.T52G:p.S18A	17qA3.3
chr17	23479590	23479590	G	A	exonic	Vmn2r117	.	nonsynonymous SNV	Vmn2r117:NM_001104581:exon1:c.C8T:p.T3I	17qA3.3
chr17	24346219	24346219	C	G	exonic	Abca17	.	nonsynonymous SNV	Abca17:NM_001031621:exon3:c.G238C:p.A80P	17qA3.3
chr17	24565605	24565605	T	G	exonic	Pkd1	.	nonsynonymous SNV	Pkd1:NM_013630:exon5:c.T1124G:p.L375R	17qA3.3
chr17	25963347	25963347	C	T	exonic	Capn15	.	nonsynonymous SNV	Capn15:NM_015830:exon2:c.G1588A:p.E530K,Capn15:NM_001347334:exon4:c.G1786A:p.E596K	17qA3.3
chr17	26205772	26205772	G	C	exonic	Rgs11	.	nonsynonymous SNV	Rgs11:NM_001081069:exon9:c.G660C:p.Q220H	17qA3.3
chr17	26267255	26267255	T	G	exonic	Luc7l	.	nonsynonymous SNV	Luc7l:NM_025881:exon5:c.T407G:p.L136R,Luc7l:NM_028190:exon5:c.T407G:p.L136R	17qA3.3
chr17	26961576	26961576	A	C	exonic	Syngap1	.	nonsynonymous SNV	Syngap1:NM_001371034:exon14:c.A2435C:p.D812A,Syngap1:NM_001281491:exon15:c.A2477C:p.D826A,Syngap1:NM_001371033:exon15:c.A2477C:p.D826A	17qA3.3
chr17	27113528	27113528	C	T	exonic	Itpr3	.	nonsynonymous SNV	Itpr3:NM_080553:exon40:c.C5345T:p.S1782L	17qA3.3
chr17	27193920	27193920	G	A	exonic	Lemd2	.	synonymous SNV	Lemd2:NM_146075:exon6:c.C1098T:p.S366S	17qA3.3
chr17	27438722	27438722	G	T	exonic	Grm4	.	synonymous SNV	Grm4:NM_001013385:exon6:c.C1309A:p.R437R,Grm4:NM_001360192:exon6:c.C685A:p.R229R,Grm4:NM_001379317:exon6:c.C685A:p.R229R,Grm4:NM_001291045:exon7:c.C1309A:p.R437R	17qA3.3
chr17	27564241	27564241	G	A	exonic	AI413582	.	nonsynonymous SNV	AI413582:NM_001002895:exon4:c.C151T:p.R51C	17qA3.3
chr17	30635699	30635699	C	A	exonic	Dnah8	.	synonymous SNV	Dnah8:NM_013811:exon2:c.C334A:p.R112R	17qA3.3
chr17	30694061	30694061	G	A	exonic	Dnah8	.	synonymous SNV	Dnah8:NM_013811:exon23:c.G3228A:p.K1076K	17qA3.3
chr17	30731193	30731193	T	C	exonic	Dnah8	.	synonymous SNV	Dnah8:NM_013811:exon42:c.T5985C:p.T1995T	17qA3.3
chr17	30819143	30819143	C	G	exonic	Dnah8	.	nonsynonymous SNV	Dnah8:NM_013811:exon85:c.C12775G:p.P4259A	17qA3.3
chr17	31319061	31319061	A	C	exonic	Slc37a1	.	synonymous SNV	Slc37a1:NM_001242427:exon6:c.A357C:p.I119I,Slc37a1:NM_153062:exon6:c.A357C:p.I119I	17qA3.3
chr17	32049483	32049483	G	T	exonic	Rrp1b	.	stopgain	Rrp1b:NM_001163734:exon2:c.G112T:p.E38X,Rrp1b:NM_028244:exon5:c.G415T:p.E139X	17qB1
chr17	32158652	32158652	C	G	exonic	Notch3	.	nonsynonymous SNV	Notch3:NM_008716:exon4:c.G449C:p.G150A	17qB1
chr17	32891441	32891441	C	T	exonic	Zfp870	.	startloss	Zfp870:NM_207245:exon1:c.G3A:p.M1?	17qB1
chr17	33136086	33136086	A	T	exonic	Morc2b	.	nonsynonymous SNV	Morc2b:NM_177719:exon2:c.T2711A:p.I904N,Morc2b:NM_001360203:exon3:c.T2711A:p.I904N	17qB1
chr17	34587915	34587915	C	T	exonic	Notch4	.	nonsynonymous SNV	Notch4:NM_010929:exon30:c.C5825T:p.P1942L	17qB1
chr17	34614241	34614241	C	A	exonic	Egfl8	.	nonsynonymous SNV	Egfl8:NM_152922:exon6:c.G530T:p.G177V	17qB1
chr17	34803559	34803559	T	C	exonic	Cyp21a1	.	nonsynonymous SNV	Cyp21a1:NM_009995:exon3:c.A425G:p.E142G	17qB1
chr17	34906291	34906291	A	G	exonic	Ehmt2	.	synonymous SNV	Ehmt2:NM_001286573:exon10:c.A1563G:p.T521T,Ehmt2:NM_145830:exon11:c.A1665G:p.T555T,Ehmt2:NM_147151:exon11:c.A1392G:p.T464T,Ehmt2:NM_001286575:exon12:c.A1494G:p.T498T	17qB1
chr17	35425194	35425194	A	G	exonic	H2-Q6;H2-Q8	.	nonsynonymous SNV	H2-Q6:NM_001368741:exon2:c.A151G:p.N51D,H2-Q6:NM_001368742:exon2:c.A151G:p.N51D,H2-Q8:NM_023124:exon2:c.A151G:p.N51D,H2-Q6:NM_207648:exon2:c.A151G:p.N51D	17qB1
chr17	35425198	35425198	A	C	exonic	H2-Q6;H2-Q8	.	nonsynonymous SNV	H2-Q6:NM_001368741:exon2:c.A155C:p.K52T,H2-Q6:NM_001368742:exon2:c.A155C:p.K52T,H2-Q8:NM_023124:exon2:c.A155C:p.K52T,H2-Q6:NM_207648:exon2:c.A155C:p.K52T	17qB1
chr17	35440154	35440154	C	G	exonic	H2-Q7;H2-Q9	.	nonsynonymous SNV	H2-Q7:NM_001198560:exon3:c.C580G:p.Q194E,H2-Q7:NM_001198561:exon3:c.C580G:p.Q194E,H2-Q9:NM_001201460:exon3:c.C580G:p.Q194E,H2-Q7:NM_010394:exon3:c.C580G:p.Q194E	17qB1
chr17	36041638	36041638	G	A	exonic	H2-T22;H2-T9	.	nonsynonymous SNV	H2-T22:NM_001359754:exon3:c.C220T:p.R74W,H2-T22:NM_001359756:exon3:c.C394T:p.R132W,H2-T22:NM_010397:exon3:c.C394T:p.R132W,H2-T22:NM_001347382:exon4:c.C394T:p.R132W,H2-T22:NM_001359755:exon4:c.C394T:p.R132W,H2-T9:NM_010399:exon4:c.C394T:p.R132W	17qB1
chr17	37010138	37010138	T	C	exonic	Zfp57	.	nonsynonymous SNV	Zfp57:NM_001013745:exon5:c.T883C:p.F295L,Zfp57:NM_001168501:exon5:c.T883C:p.F295L,Zfp57:NM_001168502:exon6:c.T874C:p.F292L	17qB1
chr17	37336705	37336705	A	C	exonic	Olfr103	.	nonsynonymous SNV	Olfr103:NM_146833:exon1:c.T526G:p.F176V	17qB1
chr17	37624429	37624429	G	T	exonic	Olfr116	.	nonsynonymous SNV	Olfr116:NM_146632:exon1:c.C205A:p.L69M	17qB1
chr17	37726092	37726092	T	A	exonic	Olfr120	.	nonsynonymous SNV	Olfr120:NM_146631:exon1:c.T94A:p.F32I	17qB1
chr17	40530045	40530045	A	G	exonic	Esp8	.	nonsynonymous SNV	Esp8:NM_001177584:exon3:c.A196G:p.T66A	17qB2
chr17	42807993	42807993	G	A	exonic	Cd2ap	.	nonsynonymous SNV	Cd2ap:NM_009847:exon15:c.C1553T:p.T518I	17qB3
chr17	43626518	43626518	T	G	exonic	Tdrd6	.	nonsynonymous SNV	Tdrd6:NM_001161366:exon1:c.A3638C:p.E1213A,Tdrd6:NM_001161367:exon1:c.A3638C:p.E1213A,Tdrd6:NM_198418:exon1:c.A3638C:p.E1213A,Tdrd6:NM_001357985:exon2:c.A3059C:p.E1020A	17qB3
chr17	45545166	45545166	G	A	exonic	Tmem151b	.	synonymous SNV	Tmem151b:NM_001013749:exon3:c.C1347T:p.A449A	17qB3
chr17	45568279	45568279	T	A	exonic	Hsp90ab1	.	nonsynonymous SNV	Hsp90ab1:NM_008302:exon10:c.A2015T:p.D672V	17qB3
chr17	46229336	46229336	C	T	exonic	Xpo5	.	synonymous SNV	Xpo5:NM_028198:exon19:c.C2085T:p.F695F	17qC
chr17	46244310	46244310	A	G	exonic	Polr1c	.	synonymous SNV	Polr1c:NM_009085:exon8:c.T918C:p.Y306Y	17qC
chr17	46446325	46446325	C	A	exonic	Ttbk1	.	nonsynonymous SNV	Ttbk1:NM_001162864:exon14:c.G3382T:p.A1128S	17qC
chr17	46712222	46712222	A	T	exonic	Pex6	.	nonsynonymous SNV	Pex6:NM_145488:exon1:c.A723T:p.Q241H	17qC
chr17	46763595	46763595	G	C	exonic	Ptcra	.	nonsynonymous SNV	Ptcra:NM_011195:exon1:c.C20G:p.A7G	17qC
chr17	47400410	47400410	T	C	exonic	Guca1a	.	nonsynonymous SNV	Guca1a:NM_008189:exon1:c.A10G:p.I4V	17qC
chr17	47732425	47732425	G	A	exonic	Pgc	.	nonsynonymous SNV	Pgc:NM_025973:exon6:c.G697A:p.V233M	17qC
chr17	48037084	48037084	G	T	exonic	1700122O11Rik	.	nonsynonymous SNV	1700122O11Rik:NM_029689:exon3:c.C410A:p.P137H	17qC
chr17	50963696	50963696	C	A	exonic	Tbc1d5	.	nonsynonymous SNV	Tbc1d5:NM_001285991:exon8:c.G506T:p.R169I,Tbc1d5:NM_001285993:exon8:c.G506T:p.R169I,Tbc1d5:NM_028162:exon8:c.G506T:p.R169I	17qC
chr17	51782939	51782939	C	G	exonic	Satb1	.	nonsynonymous SNV	Satb1:NM_001163630:exon7:c.G879C:p.Q293H,Satb1:NM_001163631:exon7:c.G879C:p.Q293H,Satb1:NM_001163632:exon7:c.G879C:p.Q293H,Satb1:NM_001357636:exon7:c.G879C:p.Q293H,Satb1:NM_001357637:exon7:c.G879C:p.Q293H,Satb1:NM_001357638:exon7:c.G879C:p.Q293H,Satb1:NM_001357640:exon7:c.G879C:p.Q293H,Satb1:NM_009122:exon7:c.G879C:p.Q293H	17qC
chr17	51782952	51782952	G	A	exonic	Satb1	.	nonsynonymous SNV	Satb1:NM_001163630:exon7:c.C866T:p.S289F,Satb1:NM_001163631:exon7:c.C866T:p.S289F,Satb1:NM_001163632:exon7:c.C866T:p.S289F,Satb1:NM_001357636:exon7:c.C866T:p.S289F,Satb1:NM_001357637:exon7:c.C866T:p.S289F,Satb1:NM_001357638:exon7:c.C866T:p.S289F,Satb1:NM_001357640:exon7:c.C866T:p.S289F,Satb1:NM_009122:exon7:c.C866T:p.S289F	17qC
chr17	52978292	52978292	A	G	exonic	Kcnh8	.	nonsynonymous SNV	Kcnh8:NM_001031811:exon16:c.A3289G:p.S1097G	17qC
chr17	55898135	55898135	A	G	exonic	Zfp959	.	nonsynonymous SNV	Zfp959:NM_145490:exon4:c.A1171G:p.R391G,Zfp959:NM_001360136:exon5:c.A1162G:p.R388G	17qD
chr17	55991203	55991203	T	A	exonic	Fsd1	.	nonsynonymous SNV	Fsd1:NM_183178:exon7:c.T527A:p.L176H	17qD
chr17	55999748	55999748	G	C	exonic	Stap2	.	nonsynonymous SNV	Stap2:NM_145934:exon10:c.C824G:p.A275G	17qD
chr17	56511472	56511472	G	C	exonic	Znrf4	.	synonymous SNV	Znrf4:NM_011483:exon1:c.C834G:p.R278R	17qD
chr17	57024249	57024249	C	T	exonic	Khsrp	.	nonsynonymous SNV	Khsrp:NM_010613:exon12:c.G1328A:p.R443Q	17qD
chr17	64287585	64287585	C	T	exonic	Pja2	.	nonsynonymous SNV	Pja2:NM_144859:exon7:c.G1633A:p.A545T,Pja2:NM_001025309:exon8:c.G1819A:p.A607T	17qE1.1
chr17	67631695	67631695	T	C	exonic	Lrrc30	.	nonsynonymous SNV	Lrrc30:NM_001033340:exon1:c.A889G:p.K297E	17qE1.1
chr17	67752883	67752883	G	A	exonic	Lama1	.	nonsynonymous SNV	Lama1:NM_008480:exon14:c.G1966A:p.D656N	17qE1.1
chr17	67791251	67791251	A	G	exonic	Lama1	.	synonymous SNV	Lama1:NM_008480:exon38:c.A5442G:p.S1814S	17qE1.1
chr17	67810171	67810171	G	T	exonic	Lama1	.	nonsynonymous SNV	Lama1:NM_008480:exon52:c.G7460T:p.G2487V	17qE1.1
chr17	67861277	67861277	G	A	exonic	Arhgap28	.	nonsynonymous SNV	Arhgap28:NM_001347410:exon12:c.C1391T:p.A464V,Arhgap28:NM_172964:exon12:c.C1544T:p.A515V	17qE1.1
chr17	69387428	69387428	C	T	exonic	Zbtb14	.	synonymous SNV	Zbtb14:NM_001356282:exon3:c.C120T:p.I40I,Zbtb14:NM_001356283:exon3:c.C120T:p.I40I,Zbtb14:NM_009547:exon3:c.C120T:p.I40I	17qE1.3
chr17	71714280	71714280	A	G	exonic	Togaram2	.	nonsynonymous SNV	Togaram2:NM_177087:exon15:c.A2060G:p.K687R	17qE1.3
chr17	72205807	72205807	C	G	exonic	Alk	.	nonsynonymous SNV	Alk:NM_007439:exon4:c.G1156C:p.G386R	17qE1.3
chr17	73913992	73913992	G	C	exonic	Xdh	.	nonsynonymous SNV	Xdh:NM_011723:exon17:c.C1741G:p.P581A	17qE2
chr17	74611542	74611542	A	C	exonic	Birc6	.	nonsynonymous SNV	Birc6:NM_007566:exon27:c.A5808C:p.E1936D	17qE2
chr17	74618545	74618545	G	A	exonic	Birc6	.	synonymous SNV	Birc6:NM_007566:exon32:c.G6744A:p.Q2248Q	17qE2
chr17	80251348	80251348	A	C	exonic	Dhx57	.	nonsynonymous SNV	Dhx57:NM_198942:exon16:c.T3022G:p.L1008V,Dhx57:NM_001163759:exon17:c.T3181G:p.L1061V	17qE3
chr17	83222150	83222150	A	G	exonic	Pkdcc	.	nonsynonymous SNV	Pkdcc:NM_134117:exon5:c.A1139G:p.E380G	17qE4
chr17	83762914	83762914	A	G	exonic	Mta3	.	nonsynonymous SNV	Mta3:NM_001171052:exon7:c.A503G:p.D168G,Mta3:NM_001171053:exon7:c.A503G:p.D168G,Mta3:NM_001171054:exon7:c.A503G:p.D168G,Mta3:NM_001379388:exon7:c.A503G:p.D168G,Mta3:NM_001379389:exon7:c.A503G:p.D168G,Mta3:NM_001379390:exon7:c.A503G:p.D168G,Mta3:NM_001379391:exon7:c.A503G:p.D168G,Mta3:NM_001379392:exon7:c.A503G:p.D168G,Mta3:NM_054082:exon7:c.A500G:p.D167G	17qE4
chr17	84731784	84731784	G	A	exonic	Lrpprc	.	stopgain	Lrpprc:NM_028233:exon26:c.C2767T:p.Q923X	17qE4
chr17	94877274	94877274	A	C	exonic	Gm20939	.	nonsynonymous SNV	Gm20939:NM_001379445:exon4:c.A1940C:p.N647T	17qE5
chr17	94877433	94877433	T	C	exonic	Gm20939	.	nonsynonymous SNV	Gm20939:NM_001379445:exon4:c.T2099C:p.F700S	17qE5
chr18	7266919	7266919	G	A	exonic	Armc4	.	nonsynonymous SNV	Armc4:NM_001357492:exon10:c.C1181T:p.S394L	18qA1
chr18	9848727	9848727	A	G	exonic	Colec12	.	nonsynonymous SNV	Colec12:NM_130449:exon5:c.A904G:p.T302A	18qA1
chr18	12686963	12686963	G	T	exonic	Ttc39c	.	nonsynonymous SNV	Ttc39c:NM_028341:exon3:c.G219T:p.M73I	18qA1
chr18	14706317	14706317	G	A	exonic	Psma8	.	synonymous SNV	Psma8:NM_001163609:exon1:c.G87A:p.K29K,Psma8:NM_001360823:exon1:c.G87A:p.K29K	18qA1
chr18	20283464	20283464	G	T	exonic	Dsg1c	.	synonymous SNV	Dsg1c:NM_181680:exon15:c.G2421T:p.V807V	18qA2
chr18	20539721	20539721	C	T	exonic	Dsg3	.	synonymous SNV	Dsg3:NM_030596:exon16:c.C2448T:p.A816A	18qA2
chr18	22516772	22516772	A	C	exonic	Asxl3	.	nonsynonymous SNV	Asxl3:NM_001167777:exon12:c.A1817C:p.K606T	18qA2
chr18	33203717	33203717	G	T	exonic	Stard4	.	nonsynonymous SNV	Stard4:NM_133774:exon6:c.C544A:p.Q182K	18qB1
chr18	33203720	33203720	T	C	exonic	Stard4	.	nonsynonymous SNV	Stard4:NM_133774:exon6:c.A541G:p.S181G	18qB1
chr18	35624508	35624508	T	C	exonic	Slc23a1	.	nonsynonymous SNV	Slc23a1:NM_011397:exon7:c.A709G:p.N237D	18qB2
chr18	36941121	36941121	G	T	exonic	Pcdha2	.	nonsynonymous SNV	Pcdha2:NM_198117:exon1:c.G1804T:p.G602C	18qB2
chr18	36969217	36969217	G	A	exonic	Gm38666;Pcdha6	.	nonsynonymous SNV	Gm38666:NM_001301256:exon1:c.G1489A:p.A497T,Pcdha6:NM_007767:exon1:c.G1462A:p.A488T	18qB2
chr18	37092190	37092190	G	T	exonic	Pcdhac1	.	nonsynonymous SNV	Pcdhac1:NM_001003671:exon1:c.G2055T:p.L685F	18qB2
chr18	37335146	37335146	T	A	exonic	Pcdhb6	.	nonsynonymous SNV	Pcdhb6:NM_053131:exon1:c.T1119A:p.D373E	18qB3
chr18	37514541	37514541	A	G	exonic	Pcdhb21	.	nonsynonymous SNV	Pcdhb21:NM_053146:exon1:c.A722G:p.E241G	18qB3
chr18	37748582	37748582	A	G	exonic	Pcdhga10	.	synonymous SNV	Pcdhga10:NM_033593:exon1:c.A1395G:p.R465R	18qB3
chr18	44174559	44174559	G	C	exonic	Spinkl	.	nonsynonymous SNV	Spinkl:NM_183123:exon2:c.C34G:p.L12V	18qB3
chr18	49920965	49920965	A	G	exonic	Dmxl1	.	nonsynonymous SNV	Dmxl1:NM_001081371:exon32:c.A7637G:p.N2546S	18qD1
chr18	52825960	52825960	G	T	exonic	Gm51263	.	nonsynonymous SNV	Gm51263:NM_001367923:exon1:c.G651T:p.K217N	18qD1
chr18	57930193	57930193	G	A	exonic	Slc12a2	.	nonsynonymous SNV	Slc12a2:NM_009194:exon19:c.G2744A:p.R915H	18qD3
chr18	58556780	58556780	A	T	exonic	Slc27a6	.	nonsynonymous SNV	Slc27a6:NM_001081072:exon1:c.A317T:p.D106V	18qD3
chr18	59176173	59176173	C	T	exonic	Chsy3	.	nonsynonymous SNV	Chsy3:NM_001081328:exon1:c.C497T:p.T166I	18qD3
chr18	65747742	65747742	T	C	exonic	Oacyl	.	synonymous SNV	Oacyl:NM_177028:exon13:c.T1626C:p.T542T	18qE1
chr18	67191403	67191403	G	A	exonic	Gnal	.	nonsynonymous SNV	Gnal:NM_010307:exon5:c.G427A:p.D143N,Gnal:NM_177137:exon5:c.G628A:p.D210N	18qE1
chr18	68307674	68307674	C	T	exonic	Rnmt	.	nonsynonymous SNV	Rnmt:NM_001170953:exon3:c.C407T:p.S136L,Rnmt:NM_001361003:exon3:c.C407T:p.S136L,Rnmt:NM_026440:exon3:c.C407T:p.S136L,Rnmt:NM_001361002:exon4:c.C407T:p.S136L	18qE2
chr18	70521924	70521924	A	G	exonic	Poli	.	synonymous SNV	Poli:NM_001136090:exon7:c.T789C:p.D263D,Poli:NM_001289515:exon7:c.T414C:p.D138D,Poli:NM_001289516:exon7:c.T720C:p.D240D,Poli:NM_011972:exon7:c.T978C:p.D326D	18qE2
chr18	73739090	73739090	T	G	exonic	Elac1	.	nonsynonymous SNV	Elac1:NM_053255:exon4:c.A833C:p.D278A	18qE2
chr18	74304796	74304796	A	C	exonic	Cfap53	.	nonsynonymous SNV	Cfap53:NM_028948:exon4:c.A542C:p.N181T	18qE2
chr18	74744749	74744749	G	C	exonic	Myo5b	.	nonsynonymous SNV	Myo5b:NM_201600:exon35:c.G4740C:p.E1580D	18qE2
chr18	77356899	77356899	C	T	exonic	Loxhd1	.	synonymous SNV	Loxhd1:NM_172834:exon14:c.C1950T:p.N650N	18qE3
chr18	77959139	77959139	C	G	exonic	Epg5	.	nonsynonymous SNV	Epg5:NM_001195633:exon8:c.C1772G:p.A591G	18qE3
chr18	78195780	78195780	T	G	exonic	Slc14a2	.	nonsynonymous SNV	Slc14a2:NM_001110274:exon3:c.A209C:p.K70T,Slc14a2:NM_030683:exon7:c.A623C:p.K208T,Slc14a2:NM_207651:exon7:c.A623C:p.K208T	18qE3
chr18	78858507	78858507	C	T	exonic	Setbp1	.	synonymous SNV	Setbp1:NM_053099:exon4:c.G1944A:p.V648V	18qE3
chr18	84094927	84094927	G	A	exonic	Zadh2	.	nonsynonymous SNV	Zadh2:NM_146090:exon2:c.G727A:p.V243I	18qE4
chr19	4840722	4840722	A	G	exonic	Ccdc87	.	nonsynonymous SNV	Ccdc87:NM_207268:exon1:c.A1241G:p.K414R	19qA
chr19	5570424	5570424	A	C	exonic	Ap5b1	.	nonsynonymous SNV	Ap5b1:NM_001033448:exon2:c.A1871C:p.K624T,Ap5b1:NM_001362046:exon3:c.A1871C:p.K624T	19qA
chr19	5716287	5716287	G	C	exonic	Ehbp1l1	.	nonsynonymous SNV	Ehbp1l1:NM_001114595:exon11:c.C1159G:p.P387A,Ehbp1l1:NM_001114596:exon12:c.C1195G:p.P399A,Ehbp1l1:NM_001114597:exon12:c.C4027G:p.P1343A,Ehbp1l1:NM_001381901:exon12:c.C1915G:p.P639A,Ehbp1l1:NM_053252:exon12:c.C1504G:p.P502A	19qA
chr19	5758072	5758072	G	A	exonic	Ltbp3	.	nonsynonymous SNV	Ltbp3:NM_008520:exon28:c.G3742A:p.V1248M	19qA
chr19	6121411	6121411	T	C	exonic	Snx15	.	nonsynonymous SNV	Snx15:NM_026912:exon6:c.A632G:p.E211G	19qA
chr19	6538463	6538463	G	A	exonic	Slc22a12	.	nonsynonymous SNV	Slc22a12:NM_009203:exon6:c.C1024T:p.H342Y	19qA
chr19	7896776	7896776	A	G	exonic	Slc22a27	.	synonymous SNV	Slc22a27:NM_001361980:exon4:c.T609C:p.S203S,Slc22a27:NM_134256:exon6:c.T933C:p.S311S	19qA
chr19	8335775	8335775	C	A	exonic	Slc22a30	.	nonsynonymous SNV	Slc22a30:NM_177002:exon10:c.G1645T:p.V549F	19qA
chr19	9010807	9010807	T	C	exonic	Ahnak	.	synonymous SNV	Ahnak:NM_009643:exon5:c.T9454C:p.L3152L	19qA
chr19	9016082	9016082	A	T	exonic	Ahnak	.	nonsynonymous SNV	Ahnak:NM_009643:exon5:c.A14729T:p.N4910I	19qA
chr19	10221298	10221298	C	A	exonic	Myrf	.	nonsynonymous SNV	Myrf:NM_001033481:exon8:c.G1191T:p.Q397H	19qA
chr19	10619230	10619230	C	A	exonic	Ddb1	.	nonsynonymous SNV	Ddb1:NM_015735:exon12:c.C1312A:p.L438I	19qA
chr19	12059129	12059129	T	C	exonic	Olfr1424	.	nonsynonymous SNV	Olfr1424:NM_146681:exon1:c.A622G:p.T208A	19qA
chr19	12229224	12229224	C	A	exonic	Olfr1432	.	nonsynonymous SNV	Olfr1432:NM_001011788:exon1:c.G339T:p.W113C	19qA
chr19	12394299	12394299	A	C	exonic	Olfr1440	.	nonsynonymous SNV	Olfr1440:NM_146684:exon1:c.A35C:p.K12T	19qA
chr19	12648009	12648009	A	G	exonic	Glyat	.	nonsynonymous SNV	Glyat:NM_145935:exon4:c.A196G:p.T66A	19qA
chr19	12862284	12862284	T	C	exonic	Olfr1444	.	nonsynonymous SNV	Olfr1444:NM_146702:exon1:c.T508C:p.C170R	19qA
chr19	12999911	12999911	T	C	exonic	Olfr1451	.	synonymous SNV	Olfr1451:NM_146705:exon1:c.T924C:p.I308I	19qA
chr19	13028027	13028027	A	C	exonic	Olfr1453	.	nonsynonymous SNV	Olfr1453:NM_146700:exon1:c.T301G:p.F101V	19qA
chr19	13445849	13445849	T	C	exonic	Olfr1471	.	nonsynonymous SNV	Olfr1471:NM_207132:exon1:c.T836C:p.V279A	19qA
chr19	13529852	13529852	T	G	exonic	Olfr1480	.	nonsynonymous SNV	Olfr1480:NM_207575:exon1:c.T178G:p.F60V	19qA
chr19	13633453	13633453	C	A	exonic	Olfr1489	.	nonsynonymous SNV	Olfr1489:NM_146635:exon1:c.C341A:p.A114E	19qA
chr19	13815548	13815548	A	C	exonic	Olfr1499	.	nonsynonymous SNV	Olfr1499:NM_146796:exon1:c.T41G:p.L14R	19qA
chr19	17463374	17463374	A	G	exonic	Pcsk5	.	nonsynonymous SNV	Pcsk5:NM_001190483:exon30:c.T3851C:p.L1284P	19qB
chr19	18717315	18717315	A	T	exonic	D030056L22Rik	.	nonsynonymous SNV	D030056L22Rik:NM_001374130:exon2:c.A433T:p.S145C,D030056L22Rik:NM_177640:exon2:c.A430T:p.S144C	19qB
chr19	21598274	21598274	T	C	exonic	1110059E24Rik	.	synonymous SNV	1110059E24Rik:NM_025423:exon4:c.A384G:p.R128R	19qB
chr19	23978029	23978029	C	T	exonic	Fam189a2	.	synonymous SNV	Fam189a2:NM_001114174:exon9:c.G1224A:p.R408R	19qB
chr19	25678642	25678642	T	G	exonic	Dmrt2	.	nonsynonymous SNV	Dmrt2:NM_145831:exon4:c.T1604G:p.L535R	19qC1
chr19	27837450	27837450	G	A	exonic	Rfx3	.	nonsynonymous SNV	Rfx3:NM_001360357:exon5:c.C536T:p.S179F,Rfx3:NM_011265:exon5:c.C506T:p.S169F,Rfx3:NM_001360358:exon6:c.C629T:p.S210F,Rfx3:NM_001166414:exon7:c.C506T:p.S169F	19qC1
chr19	30092046	30092046	T	C	exonic	Uhrf2	.	synonymous SNV	Uhrf2:NM_144873:exon15:c.T2172C:p.F724F	19qC1
chr19	32776051	32776051	C	T	exonic	Pten	.	nonsynonymous SNV	Pten:NM_008960:exon2:c.C116T:p.A39V	19qC1
chr19	32799998	32799998	A	C	exonic	Pten	.	nonsynonymous SNV	Pten:NM_008960:exon5:c.A391C:p.T131P	19qC1
chr19	34226627	34226627	A	T	exonic	Stambpl1	.	nonsynonymous SNV	Stambpl1:NM_001360716:exon3:c.A116T:p.N39I,Stambpl1:NM_001360718:exon3:c.A116T:p.N39I,Stambpl1:NM_001360719:exon3:c.A116T:p.N39I,Stambpl1:NM_029682:exon3:c.A116T:p.N39I,Stambpl1:NM_001360717:exon4:c.A116T:p.N39I	19qC1
chr19	34950451	34950451	G	C	exonic	Kif20b	.	nonsynonymous SNV	Kif20b:NM_001362434:exon19:c.G2992C:p.E998Q,Kif20b:NM_183046:exon19:c.G3112C:p.E1038Q	19qC1
chr19	36986618	36986618	T	A	exonic	Btaf1	.	nonsynonymous SNV	Btaf1:NM_001080706:exon20:c.T2588A:p.V863D	19qC2
chr19	37608997	37608997	G	C	exonic	Exoc6	.	synonymous SNV	Exoc6:NM_175353:exon18:c.G1845C:p.L615L	19qC2
chr19	38652039	38652039	C	T	exonic	Plce1	.	synonymous SNV	Plce1:NM_019588:exon3:c.C1728T:p.I576I	19qC3
chr19	39170955	39170955	T	C	exonic	Cyp2c66	.	synonymous SNV	Cyp2c66:NM_001011707:exon6:c.T849C:p.T283T	19qC3
chr19	39739463	39739463	C	T	exonic	Cyp2c68	.	nonsynonymous SNV	Cyp2c68:NM_001039555:exon2:c.G244A:p.A82T	19qC3
chr19	39881148	39881148	C	T	exonic	Cyp2c69	.	synonymous SNV	Cyp2c69:NM_001104525:exon3:c.G426A:p.E142E	19qC3
chr19	39881149	39881149	T	C	exonic	Cyp2c69	.	nonsynonymous SNV	Cyp2c69:NM_001104525:exon3:c.A425G:p.E142G	19qC3
chr19	40097955	40097955	C	T	exonic	Cyp2c50	.	nonsynonymous SNV	Cyp2c50:NM_001167875:exon6:c.C785T:p.A262V,Cyp2c50:NM_134144:exon7:c.C962T:p.A321V	19qC3
chr19	40607346	40607346	A	C	exonic	Tctn3	.	nonsynonymous SNV	Tctn3:NM_001365072:exon9:c.T994G:p.F332V,Tctn3:NM_026260:exon9:c.T994G:p.F332V	19qC3
chr19	41053177	41053177	A	G	exonic	Dntt	.	synonymous SNV	Dntt:NM_001043228:exon9:c.A1299G:p.V433V,Dntt:NM_009345:exon9:c.A1299G:p.V433V	19qC3
chr19	41232378	41232378	A	G	exonic	Tm9sf3	.	nonsynonymous SNV	Tm9sf3:NM_133352:exon9:c.T1144C:p.Y382H	19qC3
chr19	41585485	41585485	C	T	exonic	Lcor	.	nonsynonymous SNV	Lcor:NM_001370767:exon8:c.C4040T:p.S1347F	19qC3
chr19	43902122	43902122	G	A	exonic	Dnmbp	.	nonsynonymous SNV	Dnmbp:NM_028029:exon4:c.C1205T:p.P402L	19qC3
chr19	44397923	44397923	C	A	exonic	Scd1	.	nonsynonymous SNV	Scd1:NM_009127:exon6:c.G1064T:p.S355I	19qC3
chr19	44511732	44511732	G	A	exonic	Wnt8b	.	nonsynonymous SNV	Wnt8b:NM_011720:exon6:c.G757A:p.D253N	19qC3
chr19	46083098	46083098	G	T	exonic	Nolc1	.	nonsynonymous SNV	Nolc1:NM_001039351:exon10:c.G1479T:p.K493N,Nolc1:NM_001039352:exon10:c.G1485T:p.K495N,Nolc1:NM_001039353:exon10:c.G1482T:p.K494N,Nolc1:NM_053086:exon10:c.G1482T:p.K494N	19qC3
chr19	47652178	47652178	A	G	exonic	Col17a1	.	nonsynonymous SNV	Col17a1:NM_001290825:exon43:c.T2980C:p.S994P,Col17a1:NM_007732:exon43:c.T2980C:p.S994P	19qD1
chr19	50222143	50222143	C	G	exonic	Sorcs1	.	nonsynonymous SNV	Sorcs1:NM_001252501:exon17:c.G2283C:p.Q761H,Sorcs1:NM_001290356:exon17:c.G2283C:p.Q761H,Sorcs1:NM_001360457:exon17:c.G2283C:p.Q761H,Sorcs1:NM_021377:exon17:c.G2283C:p.Q761H	19qD1
chr19	57673230	57673230	C	T	exonic	Atrnl1	.	synonymous SNV	Atrnl1:NM_181415:exon10:c.C1641T:p.N547N	19qD2
chr19	58740507	58740507	G	A	exonic	Pnliprp1	.	synonymous SNV	Pnliprp1:NM_018874:exon11:c.G1125A:p.V375V	19qD2
chr19	58762325	58762325	G	A	exonic	Pnliprp2	.	nonsynonymous SNV	Pnliprp2:NM_011128:exon4:c.G445A:p.A149T	19qD2
chr1_GL456212_random	137879	137879	T	A	exonic	LOC102638047	.	stopgain	LOC102638047:NM_001378739:exon6:c.A781T:p.R261X,LOC102638047:NM_001378740:exon6:c.A781T:p.R261X	.
chr1_GL456212_random	145938	145938	C	G	exonic	LOC102638047	.	nonsynonymous SNV	LOC102638047:NM_001378739:exon2:c.G222C:p.Q74H,LOC102638047:NM_001378740:exon2:c.G222C:p.Q74H	.
chr1_GL456212_random	145951	145951	C	G	exonic	LOC102638047	.	nonsynonymous SNV	LOC102638047:NM_001378739:exon2:c.G209C:p.S70T,LOC102638047:NM_001378740:exon2:c.G209C:p.S70T	.
chr2	3438080	3438080	G	T	exonic	Dclre1c	.	nonsynonymous SNV	Dclre1c:NM_001302674:exon6:c.G276T:p.E92D,Dclre1c:NM_001362903:exon7:c.G321T:p.E107D,Dclre1c:NM_001110214:exon8:c.G666T:p.E222D,Dclre1c:NM_001302684:exon8:c.G666T:p.E222D,Dclre1c:NM_001362904:exon8:c.G666T:p.E222D,Dclre1c:NM_146114:exon8:c.G666T:p.E222D,Dclre1c:NM_175683:exon8:c.G666T:p.E222D	2qA1
chr2	5911874	5911874	C	A	exonic	Dhtkd1	.	nonsynonymous SNV	Dhtkd1:NM_001081131:exon11:c.G1990T:p.A664S	2qA1
chr2	10205850	10205850	C	A	exonic	Itih5	.	synonymous SNV	Itih5:NM_172471:exon6:c.C732A:p.V244V	2qA1
chr2	10404635	10404635	G	T	exonic	Sfmbt2	.	synonymous SNV	Sfmbt2:NM_001198808:exon5:c.G390T:p.V130V,Sfmbt2:NM_001198809:exon5:c.G390T:p.V130V,Sfmbt2:NM_001369078:exon5:c.G390T:p.V130V,Sfmbt2:NM_177386:exon6:c.G390T:p.V130V	2qA1
chr2	10457003	10457003	C	A	exonic	Sfmbt2	.	synonymous SNV	Sfmbt2:NM_001198808:exon9:c.C966A:p.T322T,Sfmbt2:NM_001369078:exon9:c.C966A:p.T322T,Sfmbt2:NM_177386:exon10:c.C966A:p.T322T	2qA1
chr2	10568417	10568417	A	G	exonic	Sfmbt2	.	synonymous SNV	Sfmbt2:NM_001198808:exon17:c.A1755G:p.L585L,Sfmbt2:NM_001369078:exon17:c.A1755G:p.L585L,Sfmbt2:NM_177386:exon18:c.A1755G:p.L585L	2qA1
chr2	10579183	10579183	A	C	exonic	Sfmbt2	.	nonsynonymous SNV	Sfmbt2:NM_001369078:exon20:c.A2350C:p.T784P,Sfmbt2:NM_001198808:exon21:c.A2449C:p.T817P,Sfmbt2:NM_177386:exon21:c.A2350C:p.T784P	2qA1
chr2	13294229	13294229	G	A	exonic	Cubn	.	nonsynonymous SNV	Cubn:NM_001081084:exon60:c.C9632T:p.S3211L	2qA1
chr2	15075021	15075021	G	A	exonic	Arl5b	.	nonsynonymous SNV	Arl5b:NM_029466:exon5:c.G399A:p.M133I	2qA2
chr2	23400217	23400217	G	T	exonic	Nxph2	.	nonsynonymous SNV	Nxph2:NM_008752:exon2:c.G580T:p.A194S	2qA3
chr2	24661844	24661844	T	A	exonic	Cacna1b	.	nonsynonymous SNV	Cacna1b:NM_001042528:exon21:c.A3290T:p.K1097M,Cacna1b:NM_007579:exon21:c.A3287T:p.K1096M	2qA3
chr2	24733945	24733945	T	A	exonic	Cacna1b	.	nonsynonymous SNV	Cacna1b:NM_001042528:exon4:c.A622T:p.S208C,Cacna1b:NM_007579:exon4:c.A622T:p.S208C	2qA3
chr2	24839676	24839676	G	A	exonic	Ehmt1	.	synonymous SNV	Ehmt1:NM_001109686:exon11:c.C1713T:p.A571A,Ehmt1:NM_001109687:exon11:c.C1728T:p.A576A,Ehmt1:NM_001012518:exon12:c.C1872T:p.A624A,Ehmt1:NM_172545:exon12:c.C1851T:p.A617A	2qA3
chr2	25273368	25273368	G	T	exonic	Anapc2	.	stopgain	Anapc2:NM_175300:exon2:c.G616T:p.G206X	2qA3
chr2	26477115	26477115	T	G	exonic	Notch1	.	nonsynonymous SNV	Notch1:NM_008714:exon13:c.A2039C:p.D680A	2qA3
chr2	27021987	27021987	G	A	exonic	Slc2a6	.	nonsynonymous SNV	Slc2a6:NM_001177627:exon9:c.C1259T:p.P420L,Slc2a6:NM_172659:exon10:c.C1421T:p.P474L	2qA3
chr2	30087101	30087101	C	T	exonic	Pkn3	.	synonymous SNV	Pkn3:NM_153805:exon16:c.C1852T:p.L618L	2qB
chr2	30256808	30256808	C	T	exonic	Lrrc8a	.	nonsynonymous SNV	Lrrc8a:NM_177725:exon3:c.C1633T:p.R545C	2qB
chr2	30274474	30274474	A	G	exonic	Phyhd1	.	nonsynonymous SNV	Phyhd1:NM_001252570:exon3:c.A197G:p.K66R,Phyhd1:NM_001252571:exon3:c.A197G:p.K66R,Phyhd1:NM_001252568:exon4:c.A257G:p.K86R,Phyhd1:NM_001281829:exon4:c.A197G:p.K66R,Phyhd1:NM_172267:exon4:c.A257G:p.K86R	2qB
chr2	31381067	31381067	G	T	exonic	Hmcn2	.	nonsynonymous SNV	Hmcn2:NM_001370902:exon25:c.G3756T:p.E1252D	2qB
chr2	31898401	31898401	G	C	exonic	Lamc3	.	nonsynonymous SNV	Lamc3:NM_011836:exon2:c.G572C:p.G191A	2qB
chr2	31979880	31979880	T	C	exonic	Nup214	.	nonsynonymous SNV	Nup214:NM_172268:exon4:c.T584C:p.V195A	2qB
chr2	31997990	31997990	C	T	exonic	Nup214	.	synonymous SNV	Nup214:NM_172268:exon14:c.C1962T:p.P654P	2qB
chr2	32011223	32011223	T	C	exonic	Nup214	.	nonsynonymous SNV	Nup214:NM_172268:exon21:c.T2818C:p.F940L	2qB
chr2	32216732	32216732	G	A	exonic	Prrc2b	.	nonsynonymous SNV	Prrc2b:NM_172661:exon17:c.G2684A:p.R895K,Prrc2b:NM_001159634:exon18:c.G4745A:p.R1582K	2qB
chr2	32630271	32630271	A	T	exonic	Ak1	.	nonsynonymous SNV	Ak1:NM_001198792:exon3:c.A80T:p.K27M,Ak1:NM_021515:exon3:c.A128T:p.K43M,Ak1:NM_001198790:exon4:c.A80T:p.K27M,Ak1:NM_001198791:exon4:c.A80T:p.K27M	2qB
chr2	32769333	32769333	C	A	exonic	Ttc16	.	nonsynonymous SNV	Ttc16:NM_001290566:exon8:c.G753T:p.L251F,Ttc16:NM_001290563:exon9:c.G924T:p.L308F,Ttc16:NM_001290564:exon9:c.G753T:p.L251F,Ttc16:NM_001290567:exon9:c.G753T:p.L251F,Ttc16:NM_177384:exon9:c.G924T:p.L308F	2qB
chr2	32963019	32963019	T	A	exonic	Rpl12	.	nonsynonymous SNV	Rpl12:NM_009076:exon4:c.T245A:p.I82N	2qB
chr2	33411108	33411108	C	G	exonic	Zbtb34	.	nonsynonymous SNV	Zbtb34:NM_001276332:exon2:c.G1366C:p.E456Q,Zbtb34:NM_001085507:exon3:c.G1420C:p.E474Q	2qB
chr2	35029470	35029470	T	A	exonic	Hc	.	nonsynonymous SNV	Hc:NM_010406:exon16:c.A2003T:p.D668V	2qB
chr2	36452906	36452906	T	G	exonic	Olfr340	.	nonsynonymous SNV	Olfr340:NM_146951:exon1:c.T320G:p.F107C	2qB
chr2	36869950	36869950	C	T	exonic	Olfr352	.	nonsynonymous SNV	Olfr352:NM_146940:exon1:c.C383T:p.A128V	2qB
chr2	36928083	36928083	A	C	exonic	Olfr355	.	synonymous SNV	Olfr355:NM_146625:exon1:c.T30G:p.V10V	2qB
chr2	36997705	36997705	A	C	exonic	Olfr357	.	nonsynonymous SNV	Olfr357:NM_146623:exon1:c.A894C:p.K298N	2qB
chr2	37270704	37270704	A	C	exonic	Olfr367-ps	.	nonsynonymous SNV	Olfr367-ps:NM_001081010:exon2:c.A160C:p.T54P	2qB
chr2	37590745	37590745	T	C	exonic	Strbp	.	synonymous SNV	Strbp:NM_001379314:exon16:c.A1809G:p.A603A,Strbp:NM_001379315:exon16:c.A1809G:p.A603A,Strbp:NM_001379316:exon16:c.A1809G:p.A603A,Strbp:NM_009261:exon16:c.A1809G:p.A603A,Strbp:NM_001355259:exon17:c.A1809G:p.A603A	2qB
chr2	48870373	48870373	T	C	exonic	Acvr2a	.	nonsynonymous SNV	Acvr2a:NM_007396:exon2:c.T140C:p.V47A	2qC1.1
chr2	51628311	51628311	C	A	exonic	Tas2r134	.	synonymous SNV	Tas2r134:NM_199158:exon1:c.C801A:p.G267G	2qC1.1
chr2	52169872	52169872	C	T	exonic	Neb	.	nonsynonymous SNV	Neb:NM_010889:exon135:c.G19006A:p.V6336I	2qC1.1
chr2	52296350	52296350	A	G	exonic	Neb	.	synonymous SNV	Neb:NM_010889:exon28:c.T2709C:p.S903S	2qC1.1
chr2	52308567	52308567	T	A	exonic	Neb	.	nonsynonymous SNV	Neb:NM_010889:exon15:c.A1268T:p.K423M	2qC1.1
chr2	59960015	59960015	T	A	exonic	Baz2b	.	nonsynonymous SNV	Baz2b:NM_001001182:exon10:c.A1853T:p.E618V	2qC1.1
chr2	60293769	60293769	G	A	exonic	Ly75	.	synonymous SNV	Ly75:NM_013825:exon35:c.C5163T:p.F1721F	2qC1.1
chr2	60620211	60620211	C	T	exonic	Itgb6	.	nonsynonymous SNV	Itgb6:NM_021359:exon11:c.G1883A:p.R628Q,Itgb6:NM_001159564:exon14:c.G1883A:p.R628Q	2qC1.2
chr2	62736103	62736103	A	C	exonic	Kcnh7	.	nonsynonymous SNV	Kcnh7:NM_133207:exon11:c.T2483G:p.L828R	2qC1.3
chr2	63184063	63184063	C	T	exonic	Kcnh7	.	synonymous SNV	Kcnh7:NM_133207:exon1:c.G15A:p.R5R	2qC1.3
chr2	63184068	63184068	G	A	exonic	Kcnh7	.	nonsynonymous SNV	Kcnh7:NM_133207:exon1:c.C10T:p.R4C	2qC1.3
chr2	64096902	64096902	A	C	exonic	Fign	.	nonsynonymous SNV	Fign:NM_021716:exon2:c.T18G:p.S6R	2qC1.3
chr2	64917258	64917258	C	T	exonic	Grb14	.	nonsynonymous SNV	Grb14:NM_016719:exon10:c.G1156A:p.V386I	2qC1.3
chr2	65764222	65764222	A	C	exonic	Scn2a	.	nonsynonymous SNV	Scn2a:NM_001099298:exon27:c.A5414C:p.K1805T,Scn2a:NM_001346679:exon27:c.A5414C:p.K1805T,Scn2a:NM_001346680:exon27:c.A5414C:p.K1805T	2qC1.3
chr2	66676257	66676257	T	C	exonic	Scn7a	.	synonymous SNV	Scn7a:NM_009135:exon25:c.A4287G:p.Q1429Q	2qC1.3
chr2	66705071	66705071	A	C	exonic	Scn7a	.	synonymous SNV	Scn7a:NM_009135:exon11:c.T1335G:p.T445T	2qC1.3
chr2	66713951	66713951	C	T	exonic	Scn7a	.	nonsynonymous SNV	Scn7a:NM_009135:exon10:c.G1195A:p.E399K	2qC1.3
chr2	67513321	67513321	A	G	exonic	Xirp2	.	nonsynonymous SNV	Xirp2:NM_001024618:exon7:c.A5905G:p.T1969A,Xirp2:NM_001083919:exon7:c.A5905G:p.T1969A	2qC1.3
chr2	69506437	69506437	G	A	exonic	Lrp2	.	synonymous SNV	Lrp2:NM_001081088:exon25:c.C3990T:p.S1330S	2qC2
chr2	69674730	69674730	A	C	exonic	Klhl41	.	nonsynonymous SNV	Klhl41:NM_001081087:exon3:c.A1376C:p.K459T	2qC2
chr2	69922367	69922367	A	G	exonic	Ubr3	.	nonsynonymous SNV	Ubr3:NM_001303033:exon4:c.A967G:p.T323A,Ubr3:NM_177783:exon4:c.A967G:p.T323A	2qC2
chr2	73381948	73381948	G	A	exonic	Gpr155	.	synonymous SNV	Gpr155:NM_001190297:exon3:c.C330T:p.S110S,Gpr155:NM_001276443:exon3:c.C330T:p.S110S,Gpr155:NM_001276444:exon3:c.C330T:p.S110S	2qC3
chr2	75937982	75937982	T	G	exonic	Ttc30b	.	nonsynonymous SNV	Ttc30b:NM_028235:exon1:c.A426C:p.E142D	2qC3
chr2	76738687	76738687	T	G	exonic	Ttn	.	nonsynonymous SNV	Ttn:NM_028004:exon154:c.A56880C:p.E18960D,Ttn:NM_011652:exon275:c.A76623C:p.E25541D,Ttn:NM_001385708:exon312:c.A82455C:p.E27485D	2qC3
chr2	76752230	76752230	G	T	exonic	Ttn	.	nonsynonymous SNV	Ttn:NM_028004:exon154:c.C43337A:p.A14446E,Ttn:NM_011652:exon275:c.C63080A:p.A21027E,Ttn:NM_001385708:exon312:c.C68912A:p.A22971E	2qC3
chr2	76752519	76752519	A	G	exonic	Ttn	.	nonsynonymous SNV	Ttn:NM_028004:exon154:c.T43048C:p.W14350R,Ttn:NM_011652:exon275:c.T62791C:p.W20931R,Ttn:NM_001385708:exon312:c.T68623C:p.W22875R	2qC3
chr2	76795752	76795752	T	A	exonic	Ttn	.	nonsynonymous SNV	Ttn:NM_028004:exon81:c.A19981T:p.I6661F,Ttn:NM_011652:exon202:c.A39724T:p.I13242F,Ttn:NM_001385708:exon239:c.A45556T:p.I15186F	2qC3
chr2	76831208	76831208	G	A	exonic	Ttn	.	nonsynonymous SNV	Ttn:NM_001385708:exon176:c.C36386T:p.P12129L	2qC3
chr2	76848325	76848325	T	G	exonic	Ttn	.	nonsynonymous SNV	Ttn:NM_011652:exon139:c.A30102C:p.K10034N,Ttn:NM_001385708:exon141:c.A33060C:p.K11020N	2qC3
chr2	76896802	76896802	A	C	exonic	Ttn	.	synonymous SNV	Ttn:NM_011652:exon60:c.T14772G:p.T4924T,Ttn:NM_001385708:exon62:c.T17793G:p.T5931T	2qC3
chr2	77128272	77128272	T	G	exonic	Ccdc141	.	nonsynonymous SNV	Ccdc141:NM_001025576:exon4:c.A483C:p.E161D	2qC3
chr2	80644258	80644258	G	A	exonic	Nup35	.	synonymous SNV	Nup35:NM_001190179:exon3:c.G267A:p.T89T,Nup35:NM_027091:exon3:c.G318A:p.T106T	2qC3
chr2	82975448	82975448	G	C	exonic	Fsip2	.	nonsynonymous SNV	Fsip2:NM_001370266:exon16:c.G2104C:p.E702Q	2qD
chr2	82987653	82987653	A	C	exonic	Fsip2	.	nonsynonymous SNV	Fsip2:NM_001370266:exon17:c.A13723C:p.S4575R	2qD
chr2	84982265	84982265	G	T	exonic	Prg2	.	nonsynonymous SNV	Prg2:NM_008920:exon3:c.G318T:p.K106N	2qD
chr2	85040653	85040653	G	A	exonic	Ssrp1	.	nonsynonymous SNV	Ssrp1:NM_001136081:exon6:c.G632A:p.R211H,Ssrp1:NM_182990:exon6:c.G632A:p.R211H	2qD
chr2	85353582	85353582	A	G	exonic	Olfr988	.	synonymous SNV	Olfr988:NM_001011534:exon1:c.T343C:p.L115L	2qD
chr2	85484181	85484181	T	G	exonic	Fads2b	.	nonsynonymous SNV	Fads2b:NM_001081664:exon12:c.A1427C:p.K476T	2qD
chr2	85663616	85663616	C	T	exonic	Olfr154	.	nonsynonymous SNV	Olfr154:NM_013728:exon1:c.G817A:p.V273I	2qD
chr2	85777122	85777122	T	G	exonic	Olfr1014	.	nonsynonymous SNV	Olfr1014:NM_146569:exon1:c.T537G:p.D179E	2qD
chr2	85923798	85923798	T	G	exonic	Olfr1026	.	nonsynonymous SNV	Olfr1026:NM_146584:exon1:c.T529G:p.F177V	2qD
chr2	86041719	86041719	T	C	exonic	Olfr1033	.	nonsynonymous SNV	Olfr1033:NM_146578:exon3:c.T403C:p.S135P	2qD
chr2	86075323	86075323	G	T	exonic	Olfr1036	.	nonsynonymous SNV	Olfr1036:NM_207142:exon1:c.G582T:p.E194D	2qD
chr2	86084982	86084982	C	T	exonic	Olfr1037	.	nonsynonymous SNV	Olfr1037:NM_001011532:exon1:c.G794A:p.S265N	2qD
chr2	86228222	86228222	C	A	exonic	Olfr1047	.	nonsynonymous SNV	Olfr1047:NM_147012:exon1:c.G748T:p.V250F	2qD
chr2	86275980	86275980	C	T	exonic	Olfr1051	.	nonsynonymous SNV	Olfr1051:NM_207562:exon1:c.G506A:p.C169Y	2qD
chr2	86386179	86386179	T	G	exonic	Olfr1058	.	nonsynonymous SNV	Olfr1058:NM_146391:exon1:c.A238C:p.K80Q	2qD
chr2	86553966	86553966	C	T	exonic	Olfr1080	.	nonsynonymous SNV	Olfr1080:NM_146409:exon2:c.G157A:p.A53T	2qD
chr2	86639003	86639003	C	T	exonic	Olfr1084	.	nonsynonymous SNV	Olfr1084:NM_207135:exon1:c.G704A:p.R235H	2qD
chr2	86786473	86786473	A	G	exonic	Olfr1093	.	nonsynonymous SNV	Olfr1093:NM_001368206:exon2:c.A742G:p.K248E,Olfr1093:NM_146366:exon3:c.A742G:p.K248E	2qD
chr2	86958666	86958666	T	G	exonic	Olfr1099	.	nonsynonymous SNV	Olfr1099:NM_146768:exon1:c.A791C:p.K264T	2qD
chr2	87048433	87048433	A	C	exonic	Olfr1106	.	nonsynonymous SNV	Olfr1106:NM_146752:exon1:c.T802G:p.L268V	2qD
chr2	87150222	87150222	C	A	exonic	Olfr1111	.	synonymous SNV	Olfr1111:NM_146593:exon1:c.G438T:p.V146V	2qD
chr2	87213778	87213778	T	G	exonic	Olfr1113	.	nonsynonymous SNV	Olfr1113:NM_207565:exon1:c.T885G:p.I295M	2qD
chr2	87357559	87357559	C	A	exonic	Olfr1120	.	synonymous SNV	Olfr1120:NM_147029:exon1:c.C114A:p.S38S	2qD
chr2	87435159	87435159	A	G	exonic	Olfr1124	.	nonsynonymous SNV	Olfr1124:NM_147028:exon1:c.A671G:p.Y224C	2qD
chr2	87575680	87575680	T	C	exonic	Olfr1129	.	nonsynonymous SNV	Olfr1129:NM_001011836:exon1:c.T595C:p.S199P	2qD
chr2	87656421	87656421	A	T	exonic	Olfr1134	.	nonsynonymous SNV	Olfr1134:NM_147030:exon2:c.T499A:p.S167T	2qD
chr2	87656877	87656877	A	C	exonic	Olfr1134	.	nonsynonymous SNV	Olfr1134:NM_147030:exon2:c.T43G:p.L15V	2qD
chr2	87746489	87746489	G	T	exonic	Olfr1140	.	nonsynonymous SNV	Olfr1140:NM_146642:exon1:c.G292T:p.A98S	2qD
chr2	87810746	87810746	C	A	exonic	Olfr1145	.	nonsynonymous SNV	Olfr1145:NM_146320:exon1:c.C925A:p.L309I	2qD
chr2	87903584	87903584	A	C	exonic	Olfr1154	.	nonsynonymous SNV	Olfr1154:NM_146647:exon1:c.T91G:p.F31V	2qD
chr2	87943448	87943448	G	A	exonic	Olfr1155	.	nonsynonymous SNV	Olfr1155:NM_146643:exon1:c.C179T:p.P60L	2qD
chr2	88678664	88678664	T	G	exonic	Olfr1193	.	nonsynonymous SNV	Olfr1193:NM_001011517:exon1:c.T808G:p.F270V	2qD
chr2	89001838	89001838	C	A	exonic	Olfr1215	.	nonsynonymous SNV	Olfr1215:NM_146459:exon1:c.G449T:p.G150V	2qE1
chr2	89629961	89629961	A	G	exonic	Olfr1249	.	synonymous SNV	Olfr1249:NM_001011796:exon1:c.T936C:p.S312S	2qE1
chr2	89943770	89943770	A	G	exonic	Olfr1259	.	nonsynonymous SNV	Olfr1259:NM_146341:exon1:c.T344C:p.V115A	2qE1
chr2	90037257	90037257	C	T	exonic	Olfr1265	.	nonsynonymous SNV	Olfr1265:NM_146343:exon1:c.C337T:p.L113F	2qE1
chr2	90282320	90282320	A	C	exonic	Olfr1272	.	nonsynonymous SNV	Olfr1272:NM_146980:exon1:c.T254G:p.V85G	2qE1
chr2	90282347	90282347	A	G	exonic	Olfr1272	.	nonsynonymous SNV	Olfr1272:NM_146980:exon1:c.T227C:p.V76A	2qE1
chr2	90401480	90401480	A	C	exonic	Olfr1274	.	nonsynonymous SNV	Olfr1274:NM_146263:exon1:c.A818C:p.Y273S	2qE1
chr2	91135359	91135359	A	G	exonic	Mybpc3	.	unknown	UNKNOWN	2qE1
chr2	91480445	91480445	C	T	exonic	Lrp4	.	synonymous SNV	Lrp4:NM_172668:exon14:c.C1830T:p.R610R	2qE1
chr2	93865948	93865948	A	C	exonic	Accsl	.	nonsynonymous SNV	Accsl:NM_001033452:exon2:c.T304G:p.F102V,Accsl:NM_001363092:exon2:c.T148G:p.F50V	2qE1
chr2	101642630	101642630	G	T	exonic	Rag1	.	synonymous SNV	Rag1:NM_009019:exon2:c.C2166A:p.G722G	2qE2
chr2	102634446	102634446	C	A	exonic	Pamr1	.	nonsynonymous SNV	Pamr1:NM_173749:exon7:c.C939A:p.F313L	2qE2
chr2	102743828	102743828	A	G	exonic	Slc1a2	.	synonymous SNV	Slc1a2:NM_001077514:exon5:c.A582G:p.K194K,Slc1a2:NM_001077515:exon5:c.A573G:p.K191K,Slc1a2:NM_001361018:exon5:c.A582G:p.K194K,Slc1a2:NM_011393:exon5:c.A573G:p.K191K	2qE2
chr2	104081003	104081003	G	C	exonic	Cd59b	.	nonsynonymous SNV	Cd59b:NM_181858:exon3:c.G68C:p.S23T,Cd59b:NM_001368215:exon4:c.G68C:p.S23T	2qE2
chr2	104434629	104434629	G	A	exonic	Hipk3	.	nonsynonymous SNV	Hipk3:NM_001145824:exon10:c.C2102T:p.S701F,Hipk3:NM_010434:exon10:c.C2105T:p.S702F	2qE2
chr2	111107098	111107098	T	A	exonic	A26c3	.	nonsynonymous SNV	A26c3:NM_001378593:exon49:c.A3570T:p.Q1190H	2qE3
chr2	111449457	111449457	T	C	exonic	Olfr1287	.	nonsynonymous SNV	Olfr1287:NM_001011773:exon1:c.T316C:p.F106L	2qE3
chr2	113441925	113441925	A	C	exonic	Fmn1	.	nonsynonymous SNV	Fmn1:NM_001285459:exon1:c.A637C:p.T213P	2qE4
chr2	113842894	113842894	A	G	exonic	Arhgap11a	.	nonsynonymous SNV	Arhgap11a:NM_181416:exon4:c.T343C:p.C115R	2qE4
chr2	118787305	118787305	A	C	exonic	Disp2	.	synonymous SNV	Disp2:NM_170593:exon5:c.A502C:p.R168R	2qE5
chr2	119809467	119809467	T	G	exonic	Tyro3	.	nonsynonymous SNV	Tyro3:NM_019392:exon9:c.T1142G:p.I381S,Tyro3:NM_001290800:exon10:c.T1130G:p.I377S	2qE5
chr2	120530490	120530490	G	T	exonic	Zfp106	.	nonsynonymous SNV	Zfp106:NM_011743:exon7:c.C3139A:p.L1047I	2qE5
chr2	120730336	120730336	T	C	exonic	Cdan1	.	nonsynonymous SNV	Cdan1:NM_026891:exon3:c.A751G:p.S251G	2qE5
chr2	121253645	121253645	T	C	exonic	Trp53bp1	.	nonsynonymous SNV	Trp53bp1:NM_001290830:exon7:c.A739G:p.K247E,Trp53bp1:NM_013735:exon7:c.A739G:p.K247E	2qE5
chr2	124664133	124664133	C	T	exonic	Sema6d	.	synonymous SNV	Sema6d:NM_172537:exon17:c.C1860T:p.A620A,Sema6d:NM_199238:exon17:c.C1821T:p.A607A,Sema6d:NM_199239:exon17:c.C1917T:p.A639A,Sema6d:NM_199240:exon17:c.C1989T:p.A663A,Sema6d:NM_199241:exon18:c.C2046T:p.A682A,Sema6d:NM_001291000:exon19:c.C2034T:p.A678A,Sema6d:NM_001290997:exon21:c.C1821T:p.A607A	2qF1
chr2	125194139	125194139	T	C	exonic	Slc12a1	.	nonsynonymous SNV	Slc12a1:NM_001079690:exon16:c.T1930C:p.S644P,Slc12a1:NM_183354:exon16:c.T1930C:p.S644P	2qF1
chr2	125341270	125341270	G	A	exonic	Fbn1	.	nonsynonymous SNV	Fbn1:NM_007993:exon43:c.C5288T:p.T1763M	2qF1
chr2	125350288	125350288	C	T	exonic	Fbn1	.	nonsynonymous SNV	Fbn1:NM_007993:exon35:c.G4300A:p.D1434N	2qF1
chr2	126797281	126797281	G	T	exonic	Trpm7	.	nonsynonymous SNV	Trpm7:NM_001164325:exon36:c.C5129A:p.A1710E,Trpm7:NM_021450:exon36:c.C5132A:p.A1711E	2qF1
chr2	127066684	127066684	A	G	exonic	Ap4e1	.	synonymous SNV	Ap4e1:NM_175550:exon21:c.A3351G:p.K1117K	2qF1
chr2	129014596	129014596	G	T	exonic	Zc3h6	.	nonsynonymous SNV	Zc3h6:NM_178404:exon10:c.G1595T:p.G532V	2qF1
chr2	130405852	130405852	C	T	exonic	1700020A23Rik	.	nonsynonymous SNV	1700020A23Rik:NM_001163483:exon2:c.C230T:p.P77L,1700020A23Rik:NM_029375:exon3:c.C230T:p.P77L	2qF1
chr2	130973399	130973399	G	A	exonic	Atrn	.	nonsynonymous SNV	Atrn:NM_009730:exon14:c.G2234A:p.S745N	2qF1
chr2	131561521	131561521	C	T	exonic	Adra1d	.	synonymous SNV	Adra1d:NM_013460:exon1:c.G648A:p.A216A	2qF1
chr2	135220846	135220846	A	C	exonic	Plcb1	.	nonsynonymous SNV	Plcb1:NM_001145830:exon4:c.A375C:p.E125D,Plcb1:NM_019677:exon4:c.A375C:p.E125D	2qF3
chr2	137085151	137085151	C	A	exonic	Jag1	.	nonsynonymous SNV	Jag1:NM_013822:exon23:c.G2687T:p.W896L	2qF3
chr2	143974486	143974486	C	A	exonic	Rrbp1	.	nonsynonymous SNV	Rrbp1:NM_024281:exon3:c.G2222T:p.G741V	2qG1
chr2	144252491	144252491	C	T	exonic	Snx5	.	nonsynonymous SNV	Snx5:NM_024225:exon12:c.G1118A:p.R373Q,Snx5:NM_001199188:exon13:c.G1118A:p.R373Q	2qG1
chr2	146129227	146129227	C	T	exonic	Cfap61	.	nonsynonymous SNV	Cfap61:NM_001369121:exon22:c.C2756T:p.P919L	2qG1
chr2	147047682	147047682	C	T	exonic	Xrn2	.	synonymous SNV	Xrn2:NM_001356402:exon20:c.C1486T:p.L496L,Xrn2:NM_001356403:exon21:c.C1291T:p.L431L,Xrn2:NM_011917:exon21:c.C1984T:p.L662L	2qG2
chr2	147184003	147184003	T	G	exonic	Nkx2-2	.	nonsynonymous SNV	Nkx2-2:NM_010919:exon2:c.A814C:p.T272P	2qG2
chr2	147184382	147184382	C	G	exonic	Nkx2-2	.	synonymous SNV	Nkx2-2:NM_001077632:exon2:c.G435C:p.R145R,Nkx2-2:NM_010919:exon2:c.G435C:p.R145R	2qG2
chr2	148684357	148684357	A	G	exonic	Gzf1	.	synonymous SNV	Gzf1:NM_001355689:exon2:c.A747G:p.K249K,Gzf1:NM_028986:exon2:c.A747G:p.K249K	2qG3
chr2	153014037	153014037	C	T	exonic	Pdrg1	.	nonsynonymous SNV	Pdrg1:NM_178939:exon2:c.G136A:p.A46T	2qH1
chr2	155278580	155278580	A	G	exonic	Pigu	.	synonymous SNV	Pigu:NM_001004721:exon12:c.T1264C:p.L422L	2qH1
chr2	155941558	155941558	A	G	exonic	Gdf5	.	synonymous SNV	Gdf5:NM_008109:exon2:c.T1473C:p.S491S	2qH1
chr2	156509159	156509159	G	A	exonic	Epb41l1	.	synonymous SNV	Epb41l1:NM_001006664:exon11:c.G1152A:p.K384K,Epb41l1:NM_001368802:exon11:c.G1152A:p.K384K,Epb41l1:NM_001368804:exon11:c.G1152A:p.K384K,Epb41l1:NM_013510:exon11:c.G1152A:p.K384K,Epb41l1:NM_001291120:exon12:c.G1152A:p.K384K,Epb41l1:NM_001291121:exon12:c.G1152A:p.K384K,Epb41l1:NM_001291122:exon12:c.G1152A:p.K384K,Epb41l1:NM_001291123:exon12:c.G1152A:p.K384K,Epb41l1:NM_001368800:exon12:c.G1152A:p.K38…	2qH1
chr2	158614596	158614596	G	T	exonic	Slc32a1	.	synonymous SNV	Slc32a1:NM_009508:exon2:c.G1170T:p.A390A	2qH1
chr2	160966488	160966488	T	C	exonic	Chd6	.	nonsynonymous SNV	Chd6:NM_173368:exon31:c.A4805G:p.D1602G	2qH2
chr2	163023358	163023358	A	C	exonic	Ift52	.	nonsynonymous SNV	Ift52:NM_001356522:exon3:c.A128C:p.D43A,Ift52:NM_172150:exon3:c.A128C:p.D43A	2qH2
chr2	164799813	164799813	T	C	exonic	Acot8	.	nonsynonymous SNV	Acot8:NM_001362757:exon2:c.A152G:p.Q51R,Acot8:NM_001362756:exon3:c.A398G:p.Q133R,Acot8:NM_133240:exon3:c.A398G:p.Q133R	2qH3
chr2	165063040	165063040	A	T	exonic	Cd40	.	nonsynonymous SNV	Cd40:NM_011611:exon4:c.A275T:p.K92M,Cd40:NM_170702:exon4:c.A275T:p.K92M,Cd40:NM_170703:exon4:c.A275T:p.K92M,Cd40:NM_170704:exon4:c.A275T:p.K92M	2qH3
chr2	165395918	165395918	C	A	exonic	Ocstamp	.	nonsynonymous SNV	Ocstamp:NM_029021:exon3:c.G1425T:p.Q475H	2qH3
chr2	165828171	165828171	A	C	exonic	Zmynd8	.	nonsynonymous SNV	Zmynd8:NM_001252587:exon12:c.T1454G:p.L485R,Zmynd8:NM_001363021:exon12:c.T1469G:p.L490R	2qH3
chr2	165828397	165828397	G	A	exonic	Zmynd8	.	synonymous SNV	Zmynd8:NM_001252585:exon10:c.C1291T:p.L431L,Zmynd8:NM_001252584:exon11:c.C1216T:p.L406L,Zmynd8:NM_001281926:exon11:c.C1156T:p.L386L,Zmynd8:NM_001363020:exon11:c.C1291T:p.L431L,Zmynd8:NM_001252587:exon12:c.C1228T:p.L410L,Zmynd8:NM_001291158:exon12:c.C1243T:p.L415L,Zmynd8:NM_001363018:exon12:c.C1306T:p.L436L,Zmynd8:NM_001363021:exon12:c.C1243T:p.L415L,Zmynd8:NM_027230:exon12:c.C1303T:p.L435L,Zmynd8…	2qH3
chr2	167188061	167188061	G	C	exonic	Kcnb1	.	nonsynonymous SNV	Kcnb1:NM_008420:exon1:c.C563G:p.A188G	2qH3
chr2	167644864	167644864	G	C	exonic	Tmem189	.	stopgain	Tmem189:NM_145538:exon5:c.C594G:p.Y198X	2qH3
chr2	168755947	168755947	G	T	exonic	Sall4	.	synonymous SNV	Sall4:NM_175303:exon2:c.C972A:p.L324L,Sall4:NM_201395:exon2:c.C972A:p.L324L	2qH3
chr2	172985452	172985452	G	A	exonic	Spo11	.	nonsynonymous SNV	Spo11:NM_001083959:exon4:c.G382A:p.A128T,Spo11:NM_001083960:exon4:c.G343A:p.A115T,Spo11:NM_001305434:exon4:c.G343A:p.A115T,Spo11:NM_012046:exon5:c.G457A:p.A153T	2qH3
chr2	173118344	173118344	G	A	exonic	Ctcfl	.	nonsynonymous SNV	Ctcfl:NM_001081387:exon2:c.C445T:p.H149Y,Ctcfl:NM_001355185:exon2:c.C445T:p.H149Y	2qH3
chr2	174298373	174298373	A	G	exonic	Gnas	.	nonsynonymous SNV	Gnas:NM_001077507:exon1:c.A512G:p.E171G,Gnas:NM_001310085:exon1:c.A512G:p.E171G,Gnas:NM_010309:exon1:c.A512G:p.E171G,Gnas:NM_201617:exon1:c.A512G:p.E171G,Gnas:NM_201618:exon1:c.A334G:p.S112G	2qH4
chr2	174648098	174648098	C	T	exonic	Zfp831	.	synonymous SNV	Zfp831:NM_001099328:exon2:c.C3657T:p.V1219V	2qH4
chr2	178381934	178381934	C	T	exonic	Sycp2	.	nonsynonymous SNV	Sycp2:NM_177191:exon17:c.G1288A:p.V430I	2qH4
chr2	180100522	180100522	C	A	exonic	Hrh3	.	nonsynonymous SNV	Hrh3:NM_133849:exon3:c.G1312T:p.G438C	2qH4
chr2	180992861	180992861	C	T	exonic	Col20a1	.	synonymous SNV	Col20a1:NM_028518:exon4:c.C343T:p.L115L	2qH4
chr2	181149769	181149769	C	T	exonic	Eef1a2	.	synonymous SNV	Eef1a2:NM_007906:exon6:c.G936A:p.V312V	2qH4
chr2	181658633	181658633	T	C	exonic	Gm29797	.	nonsynonymous SNV	Gm29797:NM_001377050:exon2:c.T17C:p.L6P	2qH4
chr3	15411378	15411378	C	T	exonic	Sirpb1a	.	nonsynonymous SNV	Sirpb1a:NM_001002898:exon3:c.G559A:p.D187N	3qA1
chr3	15411385	15411385	C	T	exonic	Sirpb1a	.	synonymous SNV	Sirpb1a:NM_001002898:exon3:c.G552A:p.K184K	3qA1
chr3	15411410	15411410	C	T	exonic	Sirpb1a	.	nonsynonymous SNV	Sirpb1a:NM_001002898:exon3:c.G527A:p.R176Q	3qA1
chr3	15416972	15416972	T	G	exonic	Sirpb1a	.	nonsynonymous SNV	Sirpb1a:NM_001002898:exon2:c.A295C:p.M99L	3qA1
chr3	15416977	15416977	T	C	exonic	Sirpb1a	.	nonsynonymous SNV	Sirpb1a:NM_001002898:exon2:c.A290G:p.N97S	3qA1
chr3	15416986	15416986	G	T	exonic	Sirpb1a	.	nonsynonymous SNV	Sirpb1a:NM_001002898:exon2:c.C281A:p.T94K	3qA1
chr3	15417001	15417001	T	C	exonic	Sirpb1a	.	nonsynonymous SNV	Sirpb1a:NM_001002898:exon2:c.A266G:p.N89S	3qA1
chr3	15417016	15417016	G	A	exonic	Sirpb1a	.	nonsynonymous SNV	Sirpb1a:NM_001002898:exon2:c.C251T:p.S84F	3qA1
chr3	15417020	15417020	G	A	exonic	Sirpb1a	.	nonsynonymous SNV	Sirpb1a:NM_001002898:exon2:c.C247T:p.H83Y	3qA1
chr3	15417060	15417060	T	A	exonic	Sirpb1a	.	synonymous SNV	Sirpb1a:NM_001002898:exon2:c.A207T:p.V69V	3qA1
chr3	15417069	15417069	A	G	exonic	Sirpb1a	.	synonymous SNV	Sirpb1a:NM_001002898:exon2:c.T198C:p.Y66Y	3qA1
chr3	15417076	15417076	C	T	exonic	Sirpb1a	.	nonsynonymous SNV	Sirpb1a:NM_001002898:exon2:c.G191A:p.R64K	3qA1
chr3	15417117	15417117	T	C	exonic	Sirpb1a	.	synonymous SNV	Sirpb1a:NM_001002898:exon2:c.A150G:p.L50L	3qA1
chr3	15548774	15548774	G	A	exonic	Sirpb1b	.	nonsynonymous SNV	Sirpb1b:NM_001173460:exon2:c.C247T:p.H83Y	3qA1
chr3	15548789	15548789	A	G	exonic	Sirpb1b	.	nonsynonymous SNV	Sirpb1b:NM_001173460:exon2:c.T232C:p.S78P	3qA1
chr3	15548790	15548790	C	G	exonic	Sirpb1b	.	nonsynonymous SNV	Sirpb1b:NM_001173460:exon2:c.G231C:p.Q77H	3qA1
chr3	15548792	15548792	G	A	exonic	Sirpb1b	.	stopgain	Sirpb1b:NM_001173460:exon2:c.C229T:p.Q77X	3qA1
chr3	15548814	15548814	T	A	exonic	Sirpb1b	.	synonymous SNV	Sirpb1b:NM_001173460:exon2:c.A207T:p.V69V	3qA1
chr3	15548830	15548830	C	T	exonic	Sirpb1b	.	nonsynonymous SNV	Sirpb1b:NM_001173460:exon2:c.G191A:p.R64K	3qA1
chr3	15548854	15548854	G	T	exonic	Sirpb1b	.	nonsynonymous SNV	Sirpb1b:NM_001173460:exon2:c.C167A:p.S56Y	3qA1
chr3	15548925	15548925	C	T	exonic	Sirpb1b	.	synonymous SNV	Sirpb1b:NM_001173460:exon2:c.G96A:p.K32K	3qA1
chr3	15548939	15548939	T	C	exonic	Sirpb1b	.	nonsynonymous SNV	Sirpb1b:NM_001173460:exon2:c.A82G:p.M28V	3qA1
chr3	15838649	15838649	C	A	exonic	Sirpb1c	.	nonsynonymous SNV	Sirpb1c:NM_001173459:exon2:c.G390T:p.M130I	3qA1
chr3	15838666	15838666	G	A	exonic	Sirpb1c	.	nonsynonymous SNV	Sirpb1c:NM_001173459:exon2:c.C373T:p.P125S	3qA1
chr3	15838758	15838758	G	T	exonic	Sirpb1c	.	nonsynonymous SNV	Sirpb1c:NM_001173459:exon2:c.C281A:p.T94K	3qA1
chr3	15838790	15838790	G	A	exonic	Sirpb1c	.	synonymous SNV	Sirpb1c:NM_001173459:exon2:c.C249T:p.R83R	3qA1
chr3	15838791	15838791	C	T	exonic	Sirpb1c	.	nonsynonymous SNV	Sirpb1c:NM_001173459:exon2:c.G248A:p.R83H	3qA1
chr3	15838792	15838792	G	A	exonic	Sirpb1c	.	nonsynonymous SNV	Sirpb1c:NM_001173459:exon2:c.C247T:p.R83C	3qA1
chr3	19149507	19149507	C	A	exonic	Armc1	.	nonsynonymous SNV	Armc1:NM_001357689:exon3:c.G254T:p.S85I,Armc1:NM_028840:exon3:c.G254T:p.S85I	3qA2
chr3	24058172	24058172	T	G	exonic	Naaladl2	.	nonsynonymous SNV	Naaladl2:NM_001326288:exon10:c.A1745C:p.N582T	3qA3
chr3	27465808	27465808	G	C	exonic	Fndc3b	.	nonsynonymous SNV	Fndc3b:NM_173182:exon15:c.C1683G:p.C561W,Fndc3b:NM_001356953:exon16:c.C1683G:p.C561W	3qA3
chr3	28029243	28029243	A	C	exonic	Pld1	.	nonsynonymous SNV	Pld1:NM_001368667:exon5:c.A511C:p.I171L,Pld1:NM_008875:exon5:c.A511C:p.I171L,Pld1:NM_001164056:exon6:c.A511C:p.I171L	3qA3
chr3	54375127	54375127	A	T	exonic	Postn	.	nonsynonymous SNV	Postn:NM_001198765:exon11:c.A1508T:p.D503V,Postn:NM_001198766:exon11:c.A1508T:p.D503V,Postn:NM_001313898:exon11:c.A1508T:p.D503V,Postn:NM_001313899:exon11:c.A1508T:p.D503V,Postn:NM_015784:exon11:c.A1508T:p.D503V,Postn:NM_001368678:exon12:c.A1508T:p.D503V	3qC
chr3	55723163	55723163	G	A	exonic	Nbea	.	nonsynonymous SNV	Nbea:NM_030595:exon43:c.C6752T:p.T2251I	3qC
chr3	59329938	59329938	C	T	exonic	Igsf10	.	nonsynonymous SNV	Igsf10:NM_001162884:exon5:c.G2821A:p.V941I	3qD
chr3	64509542	64509542	T	G	exonic	Vmn2r5	.	nonsynonymous SNV	Vmn2r5:NM_001385126:exon1:c.A194C:p.N65T	3qE1
chr3	64537592	64537592	C	T	exonic	Vmn2r6	.	nonsynonymous SNV	Vmn2r6:NM_001104619:exon5:c.G2444A:p.S815N,Vmn2r6:NM_001385213:exon6:c.G2717A:p.S906N	3qE1
chr3	82540609	82540609	G	A	exonic	Npy2r	.	synonymous SNV	Npy2r:NM_008731:exon2:c.C858T:p.A286A,Npy2r:NM_001205099:exon3:c.C519T:p.A173A	3qE3
chr3	83031603	83031603	A	C	exonic	Fga	.	nonsynonymous SNV	Fga:NM_001111048:exon5:c.A1284C:p.E428D,Fga:NM_010196:exon5:c.A1284C:p.E428D	3qE3
chr3	86328341	86328341	C	A	exonic	Lrba	.	synonymous SNV	Lrba:NM_001077687:exon22:c.C2751A:p.S917S,Lrba:NM_001077688:exon22:c.C2751A:p.S917S,Lrba:NM_030695:exon22:c.C2751A:p.S917S	3qF1
chr3	87367599	87367599	G	C	exonic	Cd5l	.	synonymous SNV	Cd5l:NM_009690:exon4:c.G444C:p.G148G	3qF1
chr3	87554975	87554975	G	A	exonic	Etv3l	.	synonymous SNV	Etv3l:NM_001370856:exon3:c.G126A:p.L42L	3qF1
chr3	88568211	88568211	T	C	exonic	Ubqln4	.	nonsynonymous SNV	Ubqln4:NM_033526:exon11:c.T1769C:p.L590P	3qF1
chr3	88982709	88982709	C	A	exonic	Ash1l	.	nonsynonymous SNV	Ash1l:NM_138679:exon2:c.C1894A:p.L632I	3qF1
chr3	89402569	89402569	C	G	exonic	Lenep	.	nonsynonymous SNV	Lenep:NM_020517:exon1:c.G71C:p.G24A	3qF1
chr3	89667130	89667130	A	T	exonic	Kcnn3	.	nonsynonymous SNV	Kcnn3:NM_080466:exon8:c.A1948T:p.S650C	3qF1
chr3	89954568	89954568	T	C	exonic	Atp8b2	.	nonsynonymous SNV	Atp8b2:NM_001368650:exon9:c.A677G:p.K226R,Atp8b2:NM_001081182:exon10:c.A620G:p.K207R	3qF1
chr3	90237751	90237751	C	T	exonic	Creb3l4	.	nonsynonymous SNV	Creb3l4:NM_001307935:exon8:c.G928A:p.V310M,Creb3l4:NM_001307934:exon10:c.G1093A:p.V365M,Creb3l4:NM_030080:exon10:c.G1093A:p.V365M	3qF1
chr3	90387270	90387270	A	C	exonic	Slc27a3	.	synonymous SNV	Slc27a3:NM_001316688:exon5:c.T906G:p.A302A,Slc27a3:NM_011988:exon5:c.T1293G:p.A431A	3qF1
chr3	90515942	90515942	C	G	exonic	S100a13	.	nonsynonymous SNV	S100a13:NM_009113:exon3:c.C53G:p.S18C	3qF1
chr3	92030674	92030674	C	A	exonic	Pglyrp3	.	synonymous SNV	Pglyrp3:NM_207247:exon6:c.C789A:p.G263G	3qF1
chr3	92135598	92135598	T	A	exonic	Lelp1	.	nonsynonymous SNV	Lelp1:NM_027042:exon2:c.A143T:p.K48M	3qF1
chr3	92823798	92823798	A	T	exonic	Kprp	.	synonymous SNV	Kprp:NM_028629:exon2:c.T1944A:p.A648A	3qF1
chr3	92824629	92824629	G	A	exonic	Kprp	.	synonymous SNV	Kprp:NM_028629:exon2:c.C1113T:p.P371P	3qF1
chr3	92825057	92825057	G	A	exonic	Kprp	.	stopgain	Kprp:NM_028629:exon2:c.C685T:p.Q229X	3qF1
chr3	93671233	93671233	A	C	exonic	Tdpoz1	.	nonsynonymous SNV	Tdpoz1:NM_148949:exon2:c.T243G:p.H81Q	3qF2.1
chr3	94879076	94879076	T	A	exonic	Pogz	.	nonsynonymous SNV	Pogz:NM_001368812:exon17:c.T2497A:p.F833I,Pogz:NM_001368811:exon18:c.T2656A:p.F886I,Pogz:NM_001165948:exon19:c.T2947A:p.F983I,Pogz:NM_172683:exon19:c.T2974A:p.F992I	3qF2.1
chr3	94984509	94984509	T	G	exonic	Pi4kb	.	nonsynonymous SNV	Pi4kb:NM_001293715:exon2:c.T499G:p.F167V,Pi4kb:NM_175356:exon2:c.T499G:p.F167V	3qF2.1
chr3	95734876	95734876	T	C	exonic	Ecm1	.	nonsynonymous SNV	Ecm1:NM_001252653:exon10:c.A1393G:p.I465V,Ecm1:NM_001355070:exon10:c.A1393G:p.I465V,Ecm1:NM_007899:exon10:c.A1396G:p.I466V	3qF2.1
chr3	96169824	96169824	A	G	exonic	Mtmr11	.	synonymous SNV	Mtmr11:NM_181409:exon15:c.A1497G:p.Q499Q	3qF2.1
chr3	96685018	96685018	A	C	exonic	Ankrd35	.	nonsynonymous SNV	Ankrd35:NM_001081139:exon10:c.A2619C:p.E873D,Ankrd35:NM_001356538:exon10:c.A2619C:p.E873D,Ankrd35:NM_001356539:exon10:c.A2466C:p.E822D,Ankrd35:NM_001356540:exon10:c.A2466C:p.E822D	3qF2.1
chr3	96854557	96854557	A	G	exonic	Pdzk1	.	nonsynonymous SNV	Pdzk1:NM_001146001:exon4:c.A484G:p.N162D,Pdzk1:NM_001355710:exon4:c.A484G:p.N162D,Pdzk1:NM_021517:exon4:c.A484G:p.N162D	3qF2.1
chr3	97766558	97766558	C	T	exonic	Pde4dip	.	synonymous SNV	Pde4dip:NM_178080:exon1:c.G1041A:p.T347T	3qF2.2
chr3	98162607	98162607	C	T	exonic	Adam30	.	synonymous SNV	Adam30:NM_027665:exon1:c.C1755T:p.C585C	3qF2.2
chr3	98742222	98742222	G	T	exonic	Hsd3b3	.	nonsynonymous SNV	Hsd3b3:NM_001012306:exon3:c.C619A:p.H207N,Hsd3b3:NM_001161744:exon4:c.C784A:p.H262N,Hsd3b3:NM_001161745:exon4:c.C784A:p.H262N,Hsd3b3:NM_001161742:exon5:c.C784A:p.H262N,Hsd3b3:NM_001161743:exon5:c.C784A:p.H262N	3qF2.2
chr3	98806332	98806332	T	G	exonic	Hsd3b6	.	nonsynonymous SNV	Hsd3b6:NM_013821:exon4:c.A650C:p.K217T	3qF2.2
chr3	98853332	98853332	T	C	exonic	Hsd3b1	.	synonymous SNV	Hsd3b1:NM_001304800:exon4:c.A342G:p.Q114Q,Hsd3b1:NM_008293:exon5:c.A342G:p.Q114Q	3qF2.2
chr3	98875352	98875352	A	C	exonic	Hao2	.	nonsynonymous SNV	Hao2:NM_019545:exon9:c.T1019G:p.V340G	3qF2.2
chr3	100144344	100144344	T	G	exonic	Wdr3	.	nonsynonymous SNV	Wdr3:NM_001355657:exon18:c.A1475C:p.K492T,Wdr3:NM_175552:exon18:c.A1988C:p.K663T	3qF2.2
chr3	101056437	101056437	T	G	exonic	Ptgfrn	.	nonsynonymous SNV	Ptgfrn:NM_011197:exon6:c.A1858C:p.T620P	3qF2.2
chr3	105927213	105927213	C	A	exonic	I830077J02Rik	.	nonsynonymous SNV	I830077J02Rik:NM_001033780:exon4:c.G124T:p.A42S	3qF2.2
chr3	106499874	106499874	C	T	exonic	Dennd2d	.	stopgain	Dennd2d:NM_001093754:exon11:c.C1210T:p.R404X,Dennd2d:NM_028110:exon11:c.C1240T:p.R414X,Dennd2d:NM_001278941:exon12:c.C679T:p.R227X	3qF2.3
chr3	107036953	107036953	C	A	exonic	Kcna3	.	nonsynonymous SNV	Kcna3:NM_008418:exon1:c.C531A:p.F177L	3qF2.3
chr3	108414117	108414117	T	A	exonic	Celsr2	.	nonsynonymous SNV	Celsr2:NM_001004177:exon1:c.A1378T:p.S460C,Celsr2:NM_017392:exon1:c.A1378T:p.S460C	3qF3
chr3	108883500	108883500	T	C	exonic	Fndc7	.	nonsynonymous SNV	Fndc7:NM_001165965:exon3:c.A209G:p.E70G,Fndc7:NM_177091:exon3:c.A209G:p.E70G	3qF3
chr3	114131570	114131570	T	C	exonic	Col11a1	.	synonymous SNV	Col11a1:NM_007729:exon30:c.T2400C:p.G800G	3qF3
chr3	116902952	116902952	G	A	exonic	Frrs1	.	synonymous SNV	Frrs1:NM_001113478:exon16:c.G1647A:p.R549R,Frrs1:NM_009146:exon16:c.G1647A:p.R549R	3qG1
chr3	119747859	119747859	G	A	exonic	Ptbp2	.	synonymous SNV	Ptbp2:NM_001310711:exon6:c.C528T:p.A176A,Ptbp2:NM_019550:exon6:c.C528T:p.A176A	3qG1
chr3	126439132	126439132	G	T	exonic	Arsj	.	nonsynonymous SNV	Arsj:NM_173451:exon2:c.G1526T:p.R509M	3qG1
chr3	127029509	127029509	A	G	exonic	Ank2	.	nonsynonymous SNV	Ank2:NM_001327938:exon12:c.T1241C:p.V414A,Ank2:NM_001327939:exon13:c.T1190C:p.V397A	3qG2
chr3	129683256	129683256	T	G	exonic	Egf	.	nonsynonymous SNV	Egf:NM_001329594:exon16:c.A1621C:p.S541R,Egf:NM_001310737:exon17:c.A1744C:p.S582R,Egf:NM_010113:exon22:c.A3247C:p.S1083R	3qG3
chr3	129737422	129737422	G	T	exonic	Egf	.	stopgain	Egf:NM_010113:exon3:c.C503A:p.S168X	3qG3
chr3	142630015	142630015	G	A	exonic	Gbp2	.	nonsynonymous SNV	Gbp2:NM_010260:exon5:c.G475A:p.D159N	3qH1
chr3	144746953	144746953	T	G	exonic	Clca3a1	.	nonsynonymous SNV	Clca3a1:NM_009899:exon11:c.A1768C:p.S590R	3qH2
chr3	151500175	151500175	C	A	exonic	Adgrl4	.	nonsynonymous SNV	Adgrl4:NM_133222:exon6:c.C673A:p.P225T	3qH3
chr3	154939670	154939670	G	C	exonic	Tnni3k	.	nonsynonymous SNV	Tnni3k:NM_177066:exon16:c.C1577G:p.A526G	3qH4
chr4	3172366	3172366	G	A	exonic	Vmn1r2	.	nonsynonymous SNV	Vmn1r2:NM_001167534:exon1:c.G284A:p.G95E	4qA1
chr4	3184971	3184971	G	A	exonic	Vmn1r3	.	nonsynonymous SNV	Vmn1r3:NM_001167535:exon1:c.C335T:p.T112I	4qA1
chr4	6688450	6688450	C	A	exonic	Tox	.	nonsynonymous SNV	Tox:NM_145711:exon9:c.G1556T:p.R519M,Tox:NM_001377078:exon10:c.G1556T:p.R519M,Tox:NM_001377079:exon10:c.G1556T:p.R519M	4qA1
chr4	12146079	12146079	G	T	exonic	Rbm12b1	.	nonsynonymous SNV	Rbm12b1:NM_028226:exon3:c.G2050T:p.V684L	4qA1
chr4	13865892	13865892	G	A	exonic	Runx1t1	.	nonsynonymous SNV	Runx1t1:NM_001111026:exon8:c.G1079A:p.R360Q,Runx1t1:NM_009822:exon8:c.G1058A:p.R353Q,Runx1t1:NM_001111027:exon9:c.G1139A:p.R380Q	4qA1
chr4	15065325	15065325	G	A	exonic	Necab1	.	synonymous SNV	Necab1:NM_178617:exon4:c.C258T:p.C86C	4qA2
chr4	21873684	21873684	C	G	exonic	Pnisr	.	nonsynonymous SNV	Pnisr:NM_001369189:exon11:c.C1426G:p.R476G,Pnisr:NM_001369190:exon11:c.C700G:p.R234G,Pnisr:NM_001369191:exon11:c.C700G:p.R234G,Pnisr:NM_025669:exon11:c.C1426G:p.R476G	4qA3
chr4	32733723	32733723	A	G	exonic	Mdn1	.	nonsynonymous SNV	Mdn1:NM_001081392:exon61:c.A9746G:p.E3249G	4qA5
chr4	39450810	39450810	C	T	exonic	1700009N14Rik	.	synonymous SNV	1700009N14Rik:NM_001081095:exon2:c.C15T:p.G5G	4qA5
chr4	41395091	41395091	C	A	exonic	Kif24	.	nonsynonymous SNV	Kif24:NM_024241:exon11:c.G2183T:p.S728I	4qA5
chr4	41497557	41497557	A	C	exonic	Myorg	.	nonsynonymous SNV	Myorg:NM_001085515:exon2:c.T2072G:p.L691R	4qA5
chr4	42851332	42851332	G	A	exonic	Fam205a1	.	nonsynonymous SNV	Fam205a1:NM_001277167:exon4:c.C823T:p.P275S	4qA5
chr4	43019409	43019409	G	C	exonic	Pigo	.	nonsynonymous SNV	Pigo:NM_020035:exon8:c.C2908G:p.P970A,Pigo:NM_001305386:exon9:c.C2884G:p.P962A,Pigo:NM_001305387:exon9:c.C2812G:p.P938A	4qA5
chr4	43542968	43542968	C	T	exonic	Tln1	.	synonymous SNV	Tln1:NM_011602:exon31:c.G4020A:p.R1340R	4qA5
chr4	45284080	45284080	C	T	exonic	Frmpd1	.	nonsynonymous SNV	Frmpd1:NM_001081172:exon16:c.C2900T:p.P967L	4qB1
chr4	45802539	45802539	G	C	exonic	Aldh1b1	.	nonsynonymous SNV	Aldh1b1:NM_028270:exon2:c.G76C:p.A26P	4qB1
chr4	45802540	45802540	C	T	exonic	Aldh1b1	.	nonsynonymous SNV	Aldh1b1:NM_028270:exon2:c.C77T:p.A26V	4qB1
chr4	48552525	48552525	A	C	exonic	Msantd3	.	nonsynonymous SNV	Msantd3:NM_001145924:exon2:c.A113C:p.D38A,Msantd3:NM_001145925:exon2:c.A113C:p.D38A,Msantd3:NM_028137:exon2:c.A113C:p.D38A	4qB1
chr4	49447588	49447588	T	G	exonic	Acnat1	.	nonsynonymous SNV	Acnat1:NM_001164565:exon3:c.A992C:p.K331T	4qB1
chr4	49587135	49587135	A	G	exonic	Pgap4	.	nonsynonymous SNV	Pgap4:NM_001355503:exon2:c.T32C:p.L11P,Pgap4:NM_025944:exon2:c.T32C:p.L11P	4qB1
chr4	52911067	52911067	A	T	exonic	Olfr272	.	synonymous SNV	Olfr272:NM_146839:exon1:c.T726A:p.S242S	4qB2
chr4	60741206	60741206	G	A	exonic	Mup12	.	synonymous SNV	Mup12:NM_001199995:exon1:c.C10T:p.L4L	4qB3
chr4	62087189	62087189	G	C	exonic	Mup3	.	nonsynonymous SNV	Mup3:NM_001039544:exon1:c.C43G:p.L15V	4qB3
chr4	70410241	70410241	G	A	exonic	Cdk5rap2	.	synonymous SNV	Cdk5rap2:NM_145990:exon1:c.C27T:p.G9G	4qC2
chr4	82972267	82972267	C	T	exonic	Frem1	.	nonsynonymous SNV	Frem1:NM_177863:exon16:c.G2974A:p.E992K,Frem1:NM_001198811:exon17:c.G2917A:p.E973K	4qC3
chr4	86602874	86602874	A	C	exonic	Haus6	.	nonsynonymous SNV	Haus6:NM_173400:exon5:c.T526G:p.L176V	4qC4
chr4	88676378	88676378	C	A	exonic	Ifna16	.	nonsynonymous SNV	Ifna16:NM_206867:exon1:c.G479T:p.S160I	4qC4
chr4	92146933	92146933	C	T	exonic	Izumo3	.	nonsynonymous SNV	Izumo3:NM_027034:exon1:c.G46A:p.A16T	4qC5
chr4	96307420	96307420	C	T	exonic	Cyp2j11	.	synonymous SNV	Cyp2j11:NM_001004141:exon7:c.G1038A:p.V346V	4qC5
chr4	99034520	99034520	A	G	exonic	Angptl3	.	nonsynonymous SNV	Angptl3:NM_013913:exon4:c.A797G:p.N266S	4qC6
chr4	101639329	101639329	G	A	exonic	Dnajc6	.	nonsynonymous SNV	Dnajc6:NM_001164583:exon18:c.G2692A:p.V898M,Dnajc6:NM_001164584:exon18:c.G2602A:p.V868M,Dnajc6:NM_001355179:exon18:c.G2611A:p.V871M,Dnajc6:NM_001164585:exon19:c.G2488A:p.V830M,Dnajc6:NM_001355180:exon19:c.G2488A:p.V830M,Dnajc6:NM_198412:exon19:c.G2488A:p.V830M	4qC6
chr4	101941491	101941491	A	C	exonic	Pramel19	.	nonsynonymous SNV	Pramel19:NM_001085516:exon2:c.A658C:p.S220R	4qC6
chr4	104479232	104479232	A	C	exonic	Dab1	.	nonsynonymous SNV	Dab1:NM_010014:exon2:c.A24C:p.Q8H,Dab1:NM_177259:exon2:c.A24C:p.Q8H,Dab1:NM_001369046:exon4:c.A24C:p.Q8H,Dab1:NM_001369048:exon4:c.A24C:p.Q8H,Dab1:NM_001369047:exon5:c.A24C:p.Q8H,Dab1:NM_001369049:exon5:c.A24C:p.Q8H	4qC6
chr4	109883738	109883738	G	A	exonic	Faf1	.	synonymous SNV	Faf1:NM_007983:exon14:c.G1368A:p.K456K	4qC7
chr4	115006693	115006693	T	G	exonic	Stil	.	nonsynonymous SNV	Stil:NM_001304555:exon4:c.T131G:p.L44R,Stil:NM_001304559:exon4:c.T131G:p.L44R,Stil:NM_009185:exon4:c.T131G:p.L44R	4qD1
chr4	115039073	115039073	A	G	exonic	Stil	.	synonymous SNV	Stil:NM_001304551:exon15:c.A2076G:p.Q692Q,Stil:NM_001304559:exon15:c.A1818G:p.Q606Q,Stil:NM_001304555:exon16:c.A2751G:p.Q917Q,Stil:NM_009185:exon16:c.A2754G:p.Q918Q,Stil:NM_001304553:exon17:c.A1443G:p.Q481Q	4qD1
chr4	115248496	115248496	T	G	exonic	Cyp4a29	.	nonsynonymous SNV	Cyp4a29:NM_001100183:exon4:c.T394G:p.F132V	4qD1
chr4	116820833	116820833	G	C	exonic	Hpdl	.	nonsynonymous SNV	Hpdl:NM_146256:exon1:c.C430G:p.P144A	4qD1
chr4	117213795	117213795	C	T	exonic	Armh1	.	nonsynonymous SNV	Armh1:NM_001145637:exon12:c.G1132A:p.D378N	4qD1
chr4	118581882	118581882	C	T	exonic	Cfap57	.	nonsynonymous SNV	Cfap57:NM_026789:exon15:c.G2446A:p.D816N	4qD2.1
chr4	118916588	118916588	A	C	exonic	Olfr1329	.	nonsynonymous SNV	Olfr1329:NM_001011870:exon1:c.T878G:p.L293R	4qD2.1
chr4	120552970	120552970	G	A	exonic	Ctps	.	synonymous SNV	Ctps:NM_001355491:exon9:c.C915T:p.G305G,Ctps:NM_016748:exon9:c.C915T:p.G305G	4qD2.2
chr4	126165414	126165414	T	C	exonic	Thrap3	.	synonymous SNV	Thrap3:NM_146153:exon11:c.A2838G:p.L946L,Thrap3:NM_001356455:exon12:c.A2838G:p.L946L,Thrap3:NM_001356456:exon12:c.A2838G:p.L946L	4qD2.2
chr4	126165453	126165453	G	A	exonic	Thrap3	.	synonymous SNV	Thrap3:NM_146153:exon11:c.C2799T:p.D933D,Thrap3:NM_001356455:exon12:c.C2799T:p.D933D,Thrap3:NM_001356456:exon12:c.C2799T:p.D933D	4qD2.2
chr4	126165462	126165462	T	C	exonic	Thrap3	.	nonsynonymous SNV	Thrap3:NM_146153:exon11:c.A2790G:p.I930M,Thrap3:NM_001356455:exon12:c.A2790G:p.I930M,Thrap3:NM_001356456:exon12:c.A2790G:p.I930M	4qD2.2
chr4	126317833	126317833	C	A	exonic	Adprhl2	.	synonymous SNV	Adprhl2:NM_133883:exon4:c.G606T:p.L202L	4qD2.2
chr4	128381986	128381986	C	T	exonic	Csmd2	.	synonymous SNV	Csmd2:NM_001281955:exon16:c.C2517T:p.F839F	4qD2.2
chr4	129222298	129222298	C	T	exonic	C77080	.	nonsynonymous SNV	C77080:NM_001033189:exon6:c.G2707A:p.A903T,C77080:NM_001285865:exon6:c.G2572A:p.A858T,C77080:NM_001285866:exon6:c.G2536A:p.A846T,C77080:NM_001285867:exon6:c.G2197A:p.A733T	4qD2.2
chr4	129692477	129692477	C	G	exonic	Tmem39b	.	nonsynonymous SNV	Tmem39b:NM_199305:exon4:c.G391C:p.A131P,Tmem39b:NM_001356378:exon5:c.G46C:p.A16P	4qD2.2
chr4	133245066	133245066	C	G	exonic	Map3k6	.	nonsynonymous SNV	Map3k6:NM_016693:exon6:c.C952G:p.H318D	4qD2.3
chr4	134521582	134521582	T	C	exonic	Aunip	.	synonymous SNV	Aunip:NM_001081099:exon2:c.T189C:p.S63S	4qD3
chr4	134836781	134836781	A	C	exonic	Maco1	.	nonsynonymous SNV	Maco1:NM_001355499:exon3:c.T40G:p.F14V	4qD3
chr4	136933644	136933644	C	T	exonic	Epha8	.	synonymous SNV	Epha8:NM_007939:exon10:c.G1926A:p.S642S	4qD3
chr4	138734286	138734286	T	C	exonic	Pla2g2c	.	nonsynonymous SNV	Pla2g2c:NM_008868:exon4:c.T65C:p.F22S	4qD3
chr4	141103419	141103419	C	G	exonic	Spata21	.	nonsynonymous SNV	Spata21:NM_177867:exon8:c.C1199G:p.A400G	4qD3
chr4	141118587	141118587	C	A	exonic	Szrd1	.	nonsynonymous SNV	Szrd1:NM_001025608:exon3:c.G296T:p.R99L,Szrd1:NM_001277195:exon3:c.G293T:p.R98L	4qD3
chr4	141477976	141477976	C	A	exonic	Spen	.	nonsynonymous SNV	Spen:NM_001347235:exon11:c.G3270T:p.E1090D,Spen:NM_019763:exon12:c.G3339T:p.E1113D	4qD3
chr4	141477977	141477977	T	C	exonic	Spen	.	nonsynonymous SNV	Spen:NM_001347235:exon11:c.A3269G:p.E1090G,Spen:NM_019763:exon12:c.A3338G:p.E1113G	4qD3
chr4	141805461	141805461	T	G	exonic	Casp9	.	nonsynonymous SNV	Casp9:NM_001277932:exon4:c.T667G:p.L223V,Casp9:NM_001355176:exon4:c.T664G:p.L222V,Casp9:NM_015733:exon4:c.T667G:p.L223V	4qE1
chr4	143698080	143698080	T	G	exonic	Pramel23	.	nonsynonymous SNV	Pramel23:NM_001356572:exon3:c.A792C:p.Q264H	4qE1
chr4	143727033	143727033	T	C	exonic	Pramel24	.	nonsynonymous SNV	Pramel24:NM_001085412:exon3:c.T710C:p.L237P	4qE1
chr4	144520008	144520008	G	A	exonic	Aadacl4fm1	.	synonymous SNV	Aadacl4fm1:NM_198662:exon1:c.G123A:p.V41V	4qE1
chr4	145155162	145155162	A	T	exonic	Vps13d	.	nonsynonymous SNV	Vps13d:NM_001276502:exon18:c.T3860A:p.L1287Q,Vps13d:NM_001276465:exon19:c.T3860A:p.L1287Q	4qE1
chr4	145155164	145155164	A	C	exonic	Vps13d	.	nonsynonymous SNV	Vps13d:NM_001276502:exon18:c.T3858G:p.N1286K,Vps13d:NM_001276465:exon19:c.T3858G:p.N1286K	4qE1
chr4	145622166	145622166	T	C	exonic	Gm13212	.	nonsynonymous SNV	Gm13212:NM_001324416:exon4:c.T172C:p.C58R	4qE1
chr4	145701406	145701406	T	C	exonic	Zfp980	.	nonsynonymous SNV	Zfp980:NM_001103158:exon5:c.T704C:p.L235P	4qE1
chr4	145701997	145701997	A	G	exonic	Zfp980	.	nonsynonymous SNV	Zfp980:NM_001103158:exon5:c.A1295G:p.D432G	4qE1
chr4	146464436	146464436	C	T	exonic	Zfp991;Zfp992	.	synonymous SNV	Zfp992:NM_001085522:exon3:c.C63T:p.D21D,Zfp991:NM_001083918:exon6:c.C63T:p.D21D	4qE1
chr4	146536820	146536820	A	T	exonic	Zfp981	.	nonsynonymous SNV	Zfp981:NM_001243139:exon4:c.A201T:p.Q67H,Zfp981:NM_001243138:exon5:c.A201T:p.Q67H	4qE1
chr4	146537444	146537444	C	T	exonic	Zfp981	.	synonymous SNV	Zfp981:NM_001243139:exon4:c.C825T:p.C275C,Zfp981:NM_001243138:exon5:c.C825T:p.C275C	4qE1
chr4	146537600	146537600	G	A	exonic	Zfp981	.	synonymous SNV	Zfp981:NM_001243139:exon4:c.G981A:p.E327E,Zfp981:NM_001243138:exon5:c.G981A:p.E327E	4qE1
chr4	146537623	146537623	C	A	exonic	Zfp981	.	nonsynonymous SNV	Zfp981:NM_001243139:exon4:c.C1004A:p.P335Q,Zfp981:NM_001243138:exon5:c.C1004A:p.P335Q	4qE1
chr4	146537637	146537637	T	A	exonic	Zfp981	.	nonsynonymous SNV	Zfp981:NM_001243139:exon4:c.T1018A:p.F340I,Zfp981:NM_001243138:exon5:c.T1018A:p.F340I	4qE1
chr4	146537644	146537644	G	A	exonic	Zfp981	.	nonsynonymous SNV	Zfp981:NM_001243139:exon4:c.G1025A:p.R342H,Zfp981:NM_001243138:exon5:c.G1025A:p.R342H	4qE1
chr4	146537645	146537645	T	G	exonic	Zfp981	.	synonymous SNV	Zfp981:NM_001243139:exon4:c.T1026G:p.R342R,Zfp981:NM_001243138:exon5:c.T1026G:p.R342R	4qE1
chr4	146537655	146537655	T	A	exonic	Zfp981	.	nonsynonymous SNV	Zfp981:NM_001243139:exon4:c.T1036A:p.S346T,Zfp981:NM_001243138:exon5:c.T1036A:p.S346T	4qE1
chr4	147332877	147332877	A	C	exonic	Zfp988	.	nonsynonymous SNV	Zfp988:NM_001384232:exon4:c.A1767C:p.L589F	4qE1
chr4	147390322	147390322	A	G	exonic	Zfp978	.	nonsynonymous SNV	Zfp978:NM_001378742:exon5:c.A325G:p.I109V	4qE1
chr4	147390404	147390404	A	T	exonic	Zfp978	.	nonsynonymous SNV	Zfp978:NM_001378742:exon5:c.A407T:p.H136L	4qE1
chr4	147390588	147390588	G	A	exonic	Zfp978	.	synonymous SNV	Zfp978:NM_001378742:exon5:c.G591A:p.E197E	4qE1
chr4	147390634	147390634	A	G	exonic	Zfp978	.	nonsynonymous SNV	Zfp978:NM_001378742:exon5:c.A637G:p.S213G	4qE1
chr4	147390970	147390970	A	C	exonic	Zfp978	.	nonsynonymous SNV	Zfp978:NM_001378742:exon5:c.A973C:p.T325P	4qE1
chr4	147391327	147391327	C	T	exonic	Zfp978	.	nonsynonymous SNV	Zfp978:NM_001378742:exon5:c.C1330T:p.H444Y	4qE1
chr4	147391387	147391387	C	G	exonic	Zfp978	.	nonsynonymous SNV	Zfp978:NM_001378742:exon5:c.C1390G:p.R464G	4qE1
chr4	147391418	147391418	T	G	exonic	Zfp978	.	nonsynonymous SNV	Zfp978:NM_001378742:exon5:c.T1421G:p.I474S	4qE1
chr4	147391436	147391436	T	C	exonic	Zfp978	.	nonsynonymous SNV	Zfp978:NM_001378742:exon5:c.T1439C:p.L480P	4qE1
chr4	147391511	147391511	G	A	exonic	Zfp978	.	nonsynonymous SNV	Zfp978:NM_001378742:exon5:c.G1514A:p.G505E	4qE1
chr4	147391538	147391538	T	C	exonic	Zfp978	.	nonsynonymous SNV	Zfp978:NM_001378742:exon5:c.T1541C:p.V514A	4qE1
chr4	147507621	147507621	T	C	exonic	Zfp982	.	nonsynonymous SNV	Zfp982:NM_001039209:exon1:c.T11C:p.F4S,Zfp982:NM_001365422:exon2:c.T11C:p.F4S,Zfp982:NM_001371349:exon2:c.T11C:p.F4S,Zfp982:NM_001371348:exon3:c.T11C:p.F4S	4qE1
chr4	147510773	147510773	T	C	exonic	Zfp982	.	synonymous SNV	Zfp982:NM_001039209:exon2:c.T51C:p.D17D,Zfp982:NM_001365422:exon3:c.T51C:p.D17D,Zfp982:NM_001371349:exon3:c.T51C:p.D17D,Zfp982:NM_001371348:exon4:c.T51C:p.D17D	4qE1
chr4	147510785	147510785	A	C	exonic	Zfp982	.	nonsynonymous SNV	Zfp982:NM_001039209:exon2:c.A63C:p.E21D,Zfp982:NM_001365422:exon3:c.A63C:p.E21D,Zfp982:NM_001371349:exon3:c.A63C:p.E21D,Zfp982:NM_001371348:exon4:c.A63C:p.E21D	4qE1
chr4	147510807	147510807	C	T	exonic	Zfp982	.	nonsynonymous SNV	Zfp982:NM_001039209:exon2:c.C85T:p.R29C,Zfp982:NM_001365422:exon3:c.C85T:p.R29C,Zfp982:NM_001371349:exon3:c.C85T:p.R29C,Zfp982:NM_001371348:exon4:c.C85T:p.R29C	4qE1
chr4	147512406	147512406	C	T	exonic	Zfp982	.	synonymous SNV	Zfp982:NM_001039209:exon3:c.C219T:p.V73V,Zfp982:NM_001365422:exon4:c.C219T:p.V73V,Zfp982:NM_001371349:exon4:c.C219T:p.V73V,Zfp982:NM_001371348:exon5:c.C219T:p.V73V	4qE1
chr4	147512408	147512408	A	T	exonic	Zfp982	.	nonsynonymous SNV	Zfp982:NM_001039209:exon3:c.A221T:p.H74L,Zfp982:NM_001365422:exon4:c.A221T:p.H74L,Zfp982:NM_001371349:exon4:c.A221T:p.H74L,Zfp982:NM_001371348:exon5:c.A221T:p.H74L	4qE1
chr4	147512439	147512439	T	A	exonic	Zfp982	.	synonymous SNV	Zfp982:NM_001039209:exon3:c.T252A:p.S84S,Zfp982:NM_001365422:exon4:c.T252A:p.S84S,Zfp982:NM_001371349:exon4:c.T252A:p.S84S,Zfp982:NM_001371348:exon5:c.T252A:p.S84S	4qE1
chr4	147512483	147512483	G	A	exonic	Zfp982	.	nonsynonymous SNV	Zfp982:NM_001039209:exon3:c.G296A:p.C99Y,Zfp982:NM_001365422:exon4:c.G296A:p.C99Y,Zfp982:NM_001371349:exon4:c.G296A:p.C99Y,Zfp982:NM_001371348:exon5:c.G296A:p.C99Y	4qE1
chr4	147512510	147512510	A	T	exonic	Zfp982	.	nonsynonymous SNV	Zfp982:NM_001039209:exon3:c.A323T:p.D108V,Zfp982:NM_001365422:exon4:c.A323T:p.D108V,Zfp982:NM_001371349:exon4:c.A323T:p.D108V,Zfp982:NM_001371348:exon5:c.A323T:p.D108V	4qE1
chr4	147512528	147512528	G	A	exonic	Zfp982	.	nonsynonymous SNV	Zfp982:NM_001039209:exon3:c.G341A:p.R114K,Zfp982:NM_001365422:exon4:c.G341A:p.R114K,Zfp982:NM_001371349:exon4:c.G341A:p.R114K,Zfp982:NM_001371348:exon5:c.G341A:p.R114K	4qE1
chr4	147512550	147512550	G	T	exonic	Zfp982	.	nonsynonymous SNV	Zfp982:NM_001039209:exon3:c.G363T:p.Q121H,Zfp982:NM_001365422:exon4:c.G363T:p.Q121H,Zfp982:NM_001371349:exon4:c.G363T:p.Q121H,Zfp982:NM_001371348:exon5:c.G363T:p.Q121H	4qE1
chr4	147581328	147581328	T	G	exonic	Zfp985	.	nonsynonymous SNV	Zfp985:NM_001014397:exon5:c.T117G:p.I39M	4qE1
chr4	147583197	147583197	A	G	exonic	Zfp985	.	nonsynonymous SNV	Zfp985:NM_001014397:exon6:c.A521G:p.Q174R	4qE1
chr4	147584164	147584164	C	T	exonic	Zfp985	.	synonymous SNV	Zfp985:NM_001014397:exon6:c.C1488T:p.D496D	4qE1
chr4	147584177	147584177	C	A	exonic	Zfp985	.	nonsynonymous SNV	Zfp985:NM_001014397:exon6:c.C1501A:p.H501N	4qE1
chr4	147584183	147584183	T	C	exonic	Zfp985	.	nonsynonymous SNV	Zfp985:NM_001014397:exon6:c.T1507C:p.S503P	4qE1
chr4	147584214	147584214	C	G	exonic	Zfp985	.	nonsynonymous SNV	Zfp985:NM_001014397:exon6:c.C1538G:p.T513R	4qE1
chr4	147613029	147613029	A	T	exonic	Zfp979	.	stoploss	Zfp979:NM_145078:exon5:c.T1222A:p.X408K	4qE1
chr4	147613220	147613220	C	G	exonic	Zfp979	.	nonsynonymous SNV	Zfp979:NM_145078:exon5:c.G1031C:p.S344T	4qE1
chr4	147613229	147613229	G	T	exonic	Zfp979	.	nonsynonymous SNV	Zfp979:NM_145078:exon5:c.C1022A:p.S341Y	4qE1
chr4	147613318	147613318	C	T	exonic	Zfp979	.	synonymous SNV	Zfp979:NM_145078:exon5:c.G933A:p.K311K	4qE1
chr4	147613528	147613528	C	T	exonic	Zfp979	.	synonymous SNV	Zfp979:NM_145078:exon5:c.G723A:p.K241K	4qE1
chr4	147613577	147613577	A	C	exonic	Zfp979	.	stopgain	Zfp979:NM_145078:exon5:c.T674G:p.L225X	4qE1
chr4	147613578	147613578	A	C	exonic	Zfp979	.	nonsynonymous SNV	Zfp979:NM_145078:exon5:c.T673G:p.L225V	4qE1
chr4	147613775	147613775	G	A	exonic	Zfp979	.	nonsynonymous SNV	Zfp979:NM_145078:exon5:c.C476T:p.T159I	4qE1
chr4	147613813	147613813	T	C	exonic	Zfp979	.	synonymous SNV	Zfp979:NM_145078:exon5:c.A438G:p.T146T	4qE1
chr4	147613814	147613814	G	C	exonic	Zfp979	.	nonsynonymous SNV	Zfp979:NM_145078:exon5:c.C437G:p.T146R	4qE1
chr4	147613836	147613836	G	C	exonic	Zfp979	.	nonsynonymous SNV	Zfp979:NM_145078:exon5:c.C415G:p.R139G	4qE1
chr4	147674273	147674273	T	A	exonic	Zfp534	.	nonsynonymous SNV	Zfp534:NM_001127188:exon4:c.A1938T:p.Q646H	4qE1
chr4	147674329	147674329	T	C	exonic	Zfp534	.	nonsynonymous SNV	Zfp534:NM_001127188:exon4:c.A1882G:p.R628G	4qE1
chr4	147674442	147674442	T	C	exonic	Zfp534	.	nonsynonymous SNV	Zfp534:NM_001127188:exon4:c.A1769G:p.Y590C	4qE1
chr4	147674447	147674447	T	A	exonic	Zfp534	.	nonsynonymous SNV	Zfp534:NM_001127188:exon4:c.A1764T:p.K588N	4qE1
chr4	147674490	147674490	C	T	exonic	Zfp534	.	nonsynonymous SNV	Zfp534:NM_001127188:exon4:c.G1721A:p.R574K	4qE1
chr4	147674494	147674494	C	T	exonic	Zfp534	.	nonsynonymous SNV	Zfp534:NM_001127188:exon4:c.G1717A:p.E573K	4qE1
chr4	147674549	147674549	T	G	exonic	Zfp534	.	nonsynonymous SNV	Zfp534:NM_001127188:exon4:c.A1662C:p.E554D	4qE1
chr4	147675423	147675423	T	G	exonic	Zfp534	.	nonsynonymous SNV	Zfp534:NM_001127188:exon4:c.A788C:p.K263T	4qE1
chr4	147755409	147755409	G	A	exonic	Zfp984	.	synonymous SNV	Zfp984:NM_001127189:exon6:c.C984T:p.D328D	4qE1
chr4	147755594	147755594	T	C	exonic	Zfp984	.	nonsynonymous SNV	Zfp984:NM_001127189:exon6:c.A799G:p.K267E	4qE1
chr4	148944359	148944359	T	C	exonic	Casz1	.	nonsynonymous SNV	Casz1:NM_001159344:exon16:c.T3260C:p.L1087P,Casz1:NM_027195:exon16:c.T3260C:p.L1087P	4qE2
chr4	152015547	152015547	T	A	exonic	Klhl21	.	synonymous SNV	Klhl21:NM_001033352:exon4:c.T1713A:p.R571R	4qE2
chr4	155641564	155641564	G	T	exonic	Cdk11b	.	nonsynonymous SNV	Cdk11b:NM_001355567:exon11:c.G1128T:p.E376D,Cdk11b:NM_001355568:exon11:c.G1029T:p.E343D,Cdk11b:NM_007661:exon11:c.G1131T:p.E377D,Cdk11b:NM_001347308:exon12:c.G1029T:p.E343D,Cdk11b:NM_001355569:exon13:c.G96T:p.E32D	4qE2
chr4	155886970	155886970	G	A	exonic	Ints11	.	nonsynonymous SNV	Ints11:NM_028020:exon9:c.G940A:p.D314N	4qE2
chr4	156334052	156334052	A	C	exonic	Vmn2r123;Vmn2r129	.	nonsynonymous SNV	Vmn2r129:NM_001384510:exon3:c.A628C:p.M210L	4qE2
chr4	156334196	156334196	C	A	exonic	Vmn2r123;Vmn2r129	.	nonsynonymous SNV	Vmn2r129:NM_001384510:exon3:c.C772A:p.Q258K	4qE2
chr4	156334201	156334201	A	C	exonic	Vmn2r123;Vmn2r129	.	nonsynonymous SNV	Vmn2r129:NM_001384510:exon3:c.A777C:p.Q259H	4qE2
chr4	156334263	156334263	T	C	exonic	Vmn2r123;Vmn2r129	.	nonsynonymous SNV	Vmn2r129:NM_001384510:exon3:c.T839C:p.V280A	4qE2
chr4	156334374	156334374	C	T	exonic	Vmn2r123;Vmn2r129	.	nonsynonymous SNV	Vmn2r129:NM_001384510:exon3:c.C950T:p.T317I	4qE2
chr4	156334375	156334375	T	C	exonic	Vmn2r123;Vmn2r129	.	synonymous SNV	Vmn2r129:NM_001384510:exon3:c.T951C:p.T317T	4qE2
chr4	156334386	156334386	C	A	exonic	Vmn2r123;Vmn2r129	.	nonsynonymous SNV	Vmn2r129:NM_001384510:exon3:c.C962A:p.A321E	4qE2
chr4	156334390	156334390	C	T	exonic	Vmn2r123;Vmn2r129	.	synonymous SNV	Vmn2r129:NM_001384510:exon3:c.C966T:p.H322H	4qE2
chr4	156334393	156334393	C	T	exonic	Vmn2r123;Vmn2r129	.	synonymous SNV	Vmn2r129:NM_001384510:exon3:c.C969T:p.H323H	4qE2
chr4	156334397	156334397	G	T	exonic	Vmn2r123;Vmn2r129	.	nonsynonymous SNV	Vmn2r129:NM_001384510:exon3:c.G973T:p.V325F	4qE2
chr4	156334580	156334580	A	G	exonic	Vmn2r123;Vmn2r129	.	nonsynonymous SNV	Vmn2r129:NM_001384510:exon3:c.A1156G:p.M386V	4qE2
chr4	156334605	156334605	G	A	exonic	Vmn2r123;Vmn2r129	.	nonsynonymous SNV	Vmn2r129:NM_001384510:exon3:c.G1181A:p.S394N	4qE2
chr4	156334609	156334609	A	G	exonic	Vmn2r123;Vmn2r129	.	synonymous SNV	Vmn2r129:NM_001384510:exon3:c.A1185G:p.L395L	4qE2
chr4	156334612	156334612	T	C	exonic	Vmn2r123;Vmn2r129	.	synonymous SNV	Vmn2r129:NM_001384510:exon3:c.T1188C:p.Y396Y	4qE2
chr4	156335590	156335590	T	C	exonic	Vmn2r123	.	unknown	UNKNOWN	4qE2
chr4	156338254	156338254	C	T	exonic	Vmn2r123	.	unknown	UNKNOWN	4qE2
chr4	156338295	156338295	G	A	exonic	Vmn2r123	.	unknown	UNKNOWN	4qE2
chr4	156338311	156338311	G	A	exonic	Vmn2r123	.	unknown	UNKNOWN	4qE2
chr4	156338331	156338331	A	G	exonic	Vmn2r123	.	unknown	UNKNOWN	4qE2
chr4	156338332	156338332	C	T	exonic	Vmn2r123	.	unknown	UNKNOWN	4qE2
chr4	156338337	156338337	C	A	exonic	Vmn2r123	.	unknown	UNKNOWN	4qE2
chr4	156338366	156338366	G	A	exonic	Vmn2r123	.	unknown	UNKNOWN	4qE2
chr4	156338367	156338367	C	T	exonic	Vmn2r123	.	unknown	UNKNOWN	4qE2
chr4	156338460	156338460	G	T	exonic	Vmn2r123	.	unknown	UNKNOWN	4qE2
chr4	156338484	156338484	T	G	exonic	Vmn2r123	.	unknown	UNKNOWN	4qE2
chr4	156338578	156338578	A	T	exonic	Vmn2r123	.	unknown	UNKNOWN	4qE2
chr4	156338581	156338581	A	C	exonic	Vmn2r123	.	unknown	UNKNOWN	4qE2
chr4	156338682	156338682	T	C	exonic	Vmn2r123	.	unknown	UNKNOWN	4qE2
chr4	156338705	156338705	T	C	exonic	Vmn2r123	.	unknown	UNKNOWN	4qE2
chr4	156338748	156338748	C	T	exonic	Vmn2r123	.	unknown	UNKNOWN	4qE2
chr4	156338790	156338790	T	G	exonic	Vmn2r123	.	unknown	UNKNOWN	4qE2
chr4	156338800	156338800	T	C	exonic	Vmn2r123	.	unknown	UNKNOWN	4qE2
chr4	156339003	156339003	T	C	exonic	Vmn2r123	.	unknown	UNKNOWN	4qE2
chr4_GL456216_random	34223	34223	G	C	exonic	Dhrsx	.	synonymous SNV	Dhrsx:NM_001368261:exon4:c.G372C:p.L124L,Dhrsx:NM_001368262:exon4:c.G366C:p.L122L,Dhrsx:NM_001033326:exon5:c.G474C:p.L158L	.
chr4_GL456216_random	34245	34245	T	C	exonic	Dhrsx	.	synonymous SNV	Dhrsx:NM_001368261:exon4:c.T394C:p.L132L,Dhrsx:NM_001368262:exon4:c.T388C:p.L130L,Dhrsx:NM_001033326:exon5:c.T496C:p.L166L	.
chr4_GL456216_random	34280	34280	T	C	exonic	Dhrsx	.	synonymous SNV	Dhrsx:NM_001368261:exon4:c.T429C:p.R143R,Dhrsx:NM_001368262:exon4:c.T423C:p.R141R,Dhrsx:NM_001033326:exon5:c.T531C:p.R177R	.
chr4_GL456216_random	34320	34320	G	A	exonic	Dhrsx	.	nonsynonymous SNV	Dhrsx:NM_001368261:exon4:c.G469A:p.V157M,Dhrsx:NM_001368262:exon4:c.G463A:p.V155M,Dhrsx:NM_001033326:exon5:c.G571A:p.V191M	.
chr4_GL456216_random	34723	34723	T	C	exonic	Dhrsx	.	synonymous SNV	Dhrsx:NM_001368261:exon5:c.T594C:p.P198P,Dhrsx:NM_001368262:exon5:c.T588C:p.P196P,Dhrsx:NM_001033326:exon6:c.T696C:p.P232P	.
chr4_GL456216_random	34752	34752	T	C	exonic	Dhrsx	.	nonsynonymous SNV	Dhrsx:NM_001368261:exon5:c.T623C:p.V208A,Dhrsx:NM_001368262:exon5:c.T617C:p.V206A,Dhrsx:NM_001033326:exon6:c.T725C:p.V242A	.
chr4_GL456216_random	34784	34784	T	C	exonic	Dhrsx	.	nonsynonymous SNV	Dhrsx:NM_001368261:exon5:c.T655C:p.W219R,Dhrsx:NM_001368262:exon5:c.T649C:p.W217R,Dhrsx:NM_001033326:exon6:c.T757C:p.W253R	.
chr4_GL456216_random	34825	34825	T	A	exonic	Dhrsx	.	synonymous SNV	Dhrsx:NM_001368261:exon5:c.T696A:p.V232V,Dhrsx:NM_001368262:exon5:c.T690A:p.V230V,Dhrsx:NM_001033326:exon6:c.T798A:p.V266V	.
chr4_GL456216_random	35277	35277	C	G	exonic	Dhrsx	.	synonymous SNV	Dhrsx:NM_001368261:exon6:c.C747G:p.A249A,Dhrsx:NM_001368262:exon6:c.C741G:p.A247A,Dhrsx:NM_001033326:exon7:c.C849G:p.A283A	.
chr4_GL456216_random	35295	35295	C	T	exonic	Dhrsx	.	synonymous SNV	Dhrsx:NM_001368261:exon6:c.C765T:p.V255V,Dhrsx:NM_001368262:exon6:c.C759T:p.V253V,Dhrsx:NM_001033326:exon7:c.C867T:p.V289V	.
chr4_JH584292_random	3629	3629	G	A	exonic	Vmn2r122	.	synonymous SNV	Vmn2r122:NM_001385246:exon1:c.G9A:p.Q3Q,Vmn2r122:NM_001385247:exon1:c.G9A:p.Q3Q,Vmn2r122:NM_001385250:exon1:c.G9A:p.Q3Q,Vmn2r122:NM_001385252:exon1:c.G9A:p.Q3Q,Vmn2r122:NM_009488:exon1:c.G9A:p.Q3Q,Vmn2r122:NM_009492:exon1:c.G9A:p.Q3Q	.
chr4_JH584292_random	3635	3635	C	T	exonic	Vmn2r122	.	synonymous SNV	Vmn2r122:NM_001385246:exon1:c.C15T:p.C5C,Vmn2r122:NM_001385247:exon1:c.C15T:p.C5C,Vmn2r122:NM_001385250:exon1:c.C15T:p.C5C,Vmn2r122:NM_001385252:exon1:c.C15T:p.C5C,Vmn2r122:NM_009488:exon1:c.C15T:p.C5C,Vmn2r122:NM_009492:exon1:c.C15T:p.C5C	.
chr4_JH584292_random	3636	3636	A	G	exonic	Vmn2r122	.	nonsynonymous SNV	Vmn2r122:NM_001385246:exon1:c.A16G:p.T6A,Vmn2r122:NM_001385247:exon1:c.A16G:p.T6A,Vmn2r122:NM_001385250:exon1:c.A16G:p.T6A,Vmn2r122:NM_001385252:exon1:c.A16G:p.T6A,Vmn2r122:NM_009488:exon1:c.A16G:p.T6A,Vmn2r122:NM_009492:exon1:c.A16G:p.T6A	.
chr4_JH584292_random	3642	3642	A	T	exonic	Vmn2r122	.	nonsynonymous SNV	Vmn2r122:NM_001385246:exon1:c.A22T:p.T8S,Vmn2r122:NM_001385247:exon1:c.A22T:p.T8S,Vmn2r122:NM_001385250:exon1:c.A22T:p.T8S,Vmn2r122:NM_001385252:exon1:c.A22T:p.T8S,Vmn2r122:NM_009488:exon1:c.A22T:p.T8S,Vmn2r122:NM_009492:exon1:c.A22T:p.T8S	.
chr4_JH584292_random	3650	3650	A	T	exonic	Vmn2r122	.	synonymous SNV	Vmn2r122:NM_001385246:exon1:c.A30T:p.S10S,Vmn2r122:NM_001385247:exon1:c.A30T:p.S10S,Vmn2r122:NM_001385250:exon1:c.A30T:p.S10S,Vmn2r122:NM_001385252:exon1:c.A30T:p.S10S,Vmn2r122:NM_009488:exon1:c.A30T:p.S10S,Vmn2r122:NM_009492:exon1:c.A30T:p.S10S	.
chr4_JH584292_random	3678	3678	T	C	exonic	Vmn2r122	.	synonymous SNV	Vmn2r122:NM_001385246:exon1:c.T58C:p.L20L,Vmn2r122:NM_001385247:exon1:c.T58C:p.L20L,Vmn2r122:NM_001385250:exon1:c.T58C:p.L20L,Vmn2r122:NM_001385252:exon1:c.T58C:p.L20L,Vmn2r122:NM_009488:exon1:c.T58C:p.L20L,Vmn2r122:NM_009492:exon1:c.T58C:p.L20L	.
chr4_JH584292_random	3688	3688	G	T	exonic	Vmn2r122	.	nonsynonymous SNV	Vmn2r122:NM_001385246:exon1:c.G68T:p.W23L,Vmn2r122:NM_001385247:exon1:c.G68T:p.W23L,Vmn2r122:NM_001385250:exon1:c.G68T:p.W23L,Vmn2r122:NM_001385252:exon1:c.G68T:p.W23L,Vmn2r122:NM_009488:exon1:c.G68T:p.W23L,Vmn2r122:NM_009492:exon1:c.G68T:p.W23L	.
chr4_JH584292_random	3691	3691	G	C	exonic	Vmn2r122	.	nonsynonymous SNV	Vmn2r122:NM_001385246:exon1:c.G71C:p.S24T,Vmn2r122:NM_001385247:exon1:c.G71C:p.S24T,Vmn2r122:NM_001385250:exon1:c.G71C:p.S24T,Vmn2r122:NM_001385252:exon1:c.G71C:p.S24T,Vmn2r122:NM_009488:exon1:c.G71C:p.S24T,Vmn2r122:NM_009492:exon1:c.G71C:p.S24T	.
chr4_JH584292_random	3701	3701	C	T	exonic	Vmn2r122	.	synonymous SNV	Vmn2r122:NM_001385246:exon1:c.C81T:p.S27S,Vmn2r122:NM_001385247:exon1:c.C81T:p.S27S,Vmn2r122:NM_001385250:exon1:c.C81T:p.S27S,Vmn2r122:NM_001385252:exon1:c.C81T:p.S27S,Vmn2r122:NM_009488:exon1:c.C81T:p.S27S,Vmn2r122:NM_009492:exon1:c.C81T:p.S27S	.
chr4_JH584292_random	3713	3713	G	A	exonic	Vmn2r122	.	synonymous SNV	Vmn2r122:NM_001385246:exon1:c.G93A:p.R31R,Vmn2r122:NM_001385247:exon1:c.G93A:p.R31R,Vmn2r122:NM_001385250:exon1:c.G93A:p.R31R,Vmn2r122:NM_001385252:exon1:c.G93A:p.R31R,Vmn2r122:NM_009488:exon1:c.G93A:p.R31R,Vmn2r122:NM_009492:exon1:c.G93A:p.R31R	.
chr4_JH584292_random	3718	3718	A	G	exonic	Vmn2r122	.	nonsynonymous SNV	Vmn2r122:NM_001385246:exon1:c.A98G:p.K33R,Vmn2r122:NM_001385247:exon1:c.A98G:p.K33R,Vmn2r122:NM_001385250:exon1:c.A98G:p.K33R,Vmn2r122:NM_001385252:exon1:c.A98G:p.K33R,Vmn2r122:NM_009488:exon1:c.A98G:p.K33R,Vmn2r122:NM_009492:exon1:c.A98G:p.K33R	.
chr4_JH584292_random	3722	3722	G	T	exonic	Vmn2r122	.	nonsynonymous SNV	Vmn2r122:NM_001385246:exon1:c.G102T:p.K34N,Vmn2r122:NM_001385247:exon1:c.G102T:p.K34N,Vmn2r122:NM_001385250:exon1:c.G102T:p.K34N,Vmn2r122:NM_001385252:exon1:c.G102T:p.K34N,Vmn2r122:NM_009488:exon1:c.G102T:p.K34N,Vmn2r122:NM_009492:exon1:c.G102T:p.K34N	.
chr4_JH584292_random	3732	3732	A	G	exonic	Vmn2r122	.	nonsynonymous SNV	Vmn2r122:NM_001385246:exon1:c.A112G:p.N38D,Vmn2r122:NM_001385247:exon1:c.A112G:p.N38D,Vmn2r122:NM_001385250:exon1:c.A112G:p.N38D,Vmn2r122:NM_001385252:exon1:c.A112G:p.N38D,Vmn2r122:NM_009488:exon1:c.A112G:p.N38D,Vmn2r122:NM_009492:exon1:c.A112G:p.N38D	.
chr4_JH584292_random	3733	3733	A	G	exonic	Vmn2r122	.	nonsynonymous SNV	Vmn2r122:NM_001385246:exon1:c.A113G:p.N38S,Vmn2r122:NM_001385247:exon1:c.A113G:p.N38S,Vmn2r122:NM_001385250:exon1:c.A113G:p.N38S,Vmn2r122:NM_001385252:exon1:c.A113G:p.N38S,Vmn2r122:NM_009488:exon1:c.A113G:p.N38S,Vmn2r122:NM_009492:exon1:c.A113G:p.N38S	.
chr4_JH584292_random	3746	3746	A	G	exonic	Vmn2r122	.	synonymous SNV	Vmn2r122:NM_001385246:exon1:c.A126G:p.L42L,Vmn2r122:NM_001385247:exon1:c.A126G:p.L42L,Vmn2r122:NM_001385250:exon1:c.A126G:p.L42L,Vmn2r122:NM_001385252:exon1:c.A126G:p.L42L,Vmn2r122:NM_009488:exon1:c.A126G:p.L42L,Vmn2r122:NM_009492:exon1:c.A126G:p.L42L	.
chr4_JH584292_random	3755	3755	G	A	exonic	Vmn2r122	.	synonymous SNV	Vmn2r122:NM_001385246:exon1:c.G135A:p.E45E,Vmn2r122:NM_001385247:exon1:c.G135A:p.E45E,Vmn2r122:NM_001385250:exon1:c.G135A:p.E45E,Vmn2r122:NM_001385252:exon1:c.G135A:p.E45E,Vmn2r122:NM_009488:exon1:c.G135A:p.E45E,Vmn2r122:NM_009492:exon1:c.G135A:p.E45E	.
chr4_JH584292_random	3774	3774	A	G	exonic	Vmn2r122	.	nonsynonymous SNV	Vmn2r122:NM_001385246:exon1:c.A154G:p.K52E,Vmn2r122:NM_001385247:exon1:c.A154G:p.K52E,Vmn2r122:NM_001385250:exon1:c.A154G:p.K52E,Vmn2r122:NM_001385252:exon1:c.A154G:p.K52E,Vmn2r122:NM_009488:exon1:c.A154G:p.K52E,Vmn2r122:NM_009492:exon1:c.A154G:p.K52E	.
chr4_JH584292_random	3775	3775	A	C	exonic	Vmn2r122	.	nonsynonymous SNV	Vmn2r122:NM_001385246:exon1:c.A155C:p.K52T,Vmn2r122:NM_001385247:exon1:c.A155C:p.K52T,Vmn2r122:NM_001385250:exon1:c.A155C:p.K52T,Vmn2r122:NM_001385252:exon1:c.A155C:p.K52T,Vmn2r122:NM_009488:exon1:c.A155C:p.K52T,Vmn2r122:NM_009492:exon1:c.A155C:p.K52T	.
chr4_JH584292_random	3787	3787	C	T	exonic	Vmn2r122	.	nonsynonymous SNV	Vmn2r122:NM_001385246:exon1:c.C167T:p.P56L,Vmn2r122:NM_001385247:exon1:c.C167T:p.P56L,Vmn2r122:NM_001385250:exon1:c.C167T:p.P56L,Vmn2r122:NM_001385252:exon1:c.C167T:p.P56L,Vmn2r122:NM_009488:exon1:c.C167T:p.P56L,Vmn2r122:NM_009492:exon1:c.C167T:p.P56L	.
chr4_JH584292_random	3805	3805	A	T	exonic	Vmn2r122	.	nonsynonymous SNV	Vmn2r122:NM_001385246:exon1:c.A185T:p.Y62F,Vmn2r122:NM_001385247:exon1:c.A185T:p.Y62F,Vmn2r122:NM_001385250:exon1:c.A185T:p.Y62F,Vmn2r122:NM_001385252:exon1:c.A185T:p.Y62F,Vmn2r122:NM_009488:exon1:c.A185T:p.Y62F,Vmn2r122:NM_009492:exon1:c.A185T:p.Y62F	.
chr4_JH584292_random	3814	3814	A	T	exonic	Vmn2r122	.	nonsynonymous SNV	Vmn2r122:NM_001385246:exon1:c.A194T:p.D65V,Vmn2r122:NM_001385247:exon1:c.A194T:p.D65V,Vmn2r122:NM_001385250:exon1:c.A194T:p.D65V,Vmn2r122:NM_001385252:exon1:c.A194T:p.D65V,Vmn2r122:NM_009488:exon1:c.A194T:p.D65V,Vmn2r122:NM_009492:exon1:c.A194T:p.D65V	.
chr4_JH584292_random	3817	3817	T	C	exonic	Vmn2r122	.	nonsynonymous SNV	Vmn2r122:NM_001385246:exon1:c.T197C:p.L66S,Vmn2r122:NM_001385247:exon1:c.T197C:p.L66S,Vmn2r122:NM_001385250:exon1:c.T197C:p.L66S,Vmn2r122:NM_001385252:exon1:c.T197C:p.L66S,Vmn2r122:NM_009488:exon1:c.T197C:p.L66S,Vmn2r122:NM_009492:exon1:c.T197C:p.L66S	.
chr4_JH584292_random	3820	3820	G	A	exonic	Vmn2r122	.	nonsynonymous SNV	Vmn2r122:NM_001385246:exon1:c.G200A:p.S67N,Vmn2r122:NM_001385247:exon1:c.G200A:p.S67N,Vmn2r122:NM_001385250:exon1:c.G200A:p.S67N,Vmn2r122:NM_001385252:exon1:c.G200A:p.S67N,Vmn2r122:NM_009488:exon1:c.G200A:p.S67N,Vmn2r122:NM_009492:exon1:c.G200A:p.S67N	.
chr4_JH584292_random	5661	5661	T	A	exonic	Vmn2r122	.	synonymous SNV	Vmn2r122:NM_001385246:exon2:c.T210A:p.I70I,Vmn2r122:NM_001385247:exon2:c.T210A:p.I70I,Vmn2r122:NM_001385250:exon2:c.T210A:p.I70I,Vmn2r122:NM_001385252:exon2:c.T210A:p.I70I,Vmn2r122:NM_009488:exon2:c.T210A:p.I70I,Vmn2r122:NM_009492:exon2:c.T210A:p.I70I	.
chr4_JH584292_random	5666	5666	G	C	exonic	Vmn2r122	.	nonsynonymous SNV	Vmn2r122:NM_001385246:exon2:c.G215C:p.G72A,Vmn2r122:NM_001385247:exon2:c.G215C:p.G72A,Vmn2r122:NM_001385250:exon2:c.G215C:p.G72A,Vmn2r122:NM_001385252:exon2:c.G215C:p.G72A,Vmn2r122:NM_009488:exon2:c.G215C:p.G72A,Vmn2r122:NM_009492:exon2:c.G215C:p.G72A	.
chr4_JH584292_random	5671	5671	G	A	exonic	Vmn2r122	.	nonsynonymous SNV	Vmn2r122:NM_001385246:exon2:c.G220A:p.E74K,Vmn2r122:NM_001385247:exon2:c.G220A:p.E74K,Vmn2r122:NM_001385250:exon2:c.G220A:p.E74K,Vmn2r122:NM_001385252:exon2:c.G220A:p.E74K,Vmn2r122:NM_009488:exon2:c.G220A:p.E74K,Vmn2r122:NM_009492:exon2:c.G220A:p.E74K	.
chr4_JH584292_random	5747	5747	G	C	exonic	Vmn2r122	.	nonsynonymous SNV	Vmn2r122:NM_001385246:exon2:c.G296C:p.S99T,Vmn2r122:NM_001385247:exon2:c.G296C:p.S99T,Vmn2r122:NM_001385250:exon2:c.G296C:p.S99T,Vmn2r122:NM_001385252:exon2:c.G296C:p.S99T,Vmn2r122:NM_009488:exon2:c.G296C:p.S99T,Vmn2r122:NM_009492:exon2:c.G296C:p.S99T	.
chr4_JH584292_random	5873	5873	C	A	exonic	Vmn2r122	.	nonsynonymous SNV	Vmn2r122:NM_001385246:exon2:c.C422A:p.A141D,Vmn2r122:NM_001385247:exon2:c.C422A:p.A141D,Vmn2r122:NM_001385250:exon2:c.C422A:p.A141D,Vmn2r122:NM_001385252:exon2:c.C422A:p.A141D,Vmn2r122:NM_009488:exon2:c.C422A:p.A141D,Vmn2r122:NM_009492:exon2:c.C422A:p.A141D	.
chr4_JH584292_random	5876	5876	C	T	exonic	Vmn2r122	.	nonsynonymous SNV	Vmn2r122:NM_001385246:exon2:c.C425T:p.T142I,Vmn2r122:NM_001385247:exon2:c.C425T:p.T142I,Vmn2r122:NM_001385250:exon2:c.C425T:p.T142I,Vmn2r122:NM_001385252:exon2:c.C425T:p.T142I,Vmn2r122:NM_009488:exon2:c.C425T:p.T142I,Vmn2r122:NM_009492:exon2:c.C425T:p.T142I	.
chr4_JH584292_random	6323	6323	C	T	exonic	Vmn2r122	.	synonymous SNV	Vmn2r122:NM_001385246:exon3:c.C495T:p.F165F,Vmn2r122:NM_001385247:exon3:c.C495T:p.F165F,Vmn2r122:NM_001385250:exon3:c.C495T:p.F165F,Vmn2r122:NM_001385252:exon3:c.C495T:p.F165F,Vmn2r122:NM_009488:exon3:c.C495T:p.F165F,Vmn2r122:NM_009492:exon3:c.C495T:p.F165F	.
chr4_JH584292_random	10729	10729	G	A	exonic	Vmn2r122	.	synonymous SNV	Vmn2r122:NM_009488:exon5:c.G1557A:p.S519S,Vmn2r122:NM_009492:exon5:c.G1662A:p.S554S,Vmn2r122:NM_001385246:exon6:c.G1785A:p.S595S,Vmn2r122:NM_001385247:exon6:c.G1782A:p.S594S	.
chr4_JH584292_random	10745	10745	G	A	exonic	Vmn2r122	.	nonsynonymous SNV	Vmn2r122:NM_009488:exon5:c.G1573A:p.V525I,Vmn2r122:NM_009492:exon5:c.G1678A:p.V560I,Vmn2r122:NM_001385246:exon6:c.G1801A:p.V601I,Vmn2r122:NM_001385247:exon6:c.G1798A:p.V600I	.
chr4_JH584292_random	10771	10771	G	A	exonic	Vmn2r122	.	synonymous SNV	Vmn2r122:NM_009488:exon5:c.G1599A:p.K533K,Vmn2r122:NM_009492:exon5:c.G1704A:p.K568K,Vmn2r122:NM_001385246:exon6:c.G1827A:p.K609K,Vmn2r122:NM_001385247:exon6:c.G1824A:p.K608K	.
chr4_JH584292_random	10800	10800	G	A	exonic	Vmn2r122	.	nonsynonymous SNV	Vmn2r122:NM_009488:exon5:c.G1628A:p.R543H,Vmn2r122:NM_009492:exon5:c.G1733A:p.R578H,Vmn2r122:NM_001385246:exon6:c.G1856A:p.R619H,Vmn2r122:NM_001385247:exon6:c.G1853A:p.R618H	.
chr4_JH584292_random	10801	10801	C	T	exonic	Vmn2r122	.	synonymous SNV	Vmn2r122:NM_009488:exon5:c.C1629T:p.R543R,Vmn2r122:NM_009492:exon5:c.C1734T:p.R578R,Vmn2r122:NM_001385246:exon6:c.C1857T:p.R619R,Vmn2r122:NM_001385247:exon6:c.C1854T:p.R618R	.
chr4_JH584292_random	11012	11012	A	T	exonic	Vmn2r122	.	nonsynonymous SNV	Vmn2r122:NM_009488:exon5:c.A1840T:p.M614L,Vmn2r122:NM_009492:exon5:c.A1945T:p.M649L,Vmn2r122:NM_001385246:exon6:c.A2068T:p.M690L,Vmn2r122:NM_001385247:exon6:c.A2065T:p.M689L	.
chr4_JH584292_random	11015	11015	A	C	exonic	Vmn2r122	.	nonsynonymous SNV	Vmn2r122:NM_009488:exon5:c.A1843C:p.M615L,Vmn2r122:NM_009492:exon5:c.A1948C:p.M650L,Vmn2r122:NM_001385246:exon6:c.A2071C:p.M691L,Vmn2r122:NM_001385247:exon6:c.A2068C:p.M690L	.
chr4_JH584292_random	11128	11128	A	G	exonic	Vmn2r122	.	synonymous SNV	Vmn2r122:NM_009488:exon5:c.A1956G:p.E652E,Vmn2r122:NM_009492:exon5:c.A2061G:p.E687E,Vmn2r122:NM_001385246:exon6:c.A2184G:p.E728E,Vmn2r122:NM_001385247:exon6:c.A2181G:p.E727E	.
chr5	3606075	3606075	G	A	exonic	Pex1	.	nonsynonymous SNV	Pex1:NM_001293806:exon5:c.G901A:p.A301T,Pex1:NM_027777:exon5:c.G901A:p.A301T	5qA1
chr5	3713136	3713136	T	A	exonic	Ankib1	.	nonsynonymous SNV	Ankib1:NM_001289528:exon10:c.A770T:p.E257V,Ankib1:NM_001003909:exon11:c.A1592T:p.E531V,Ankib1:NM_001289527:exon11:c.A1592T:p.E531V,Ankib1:NM_001289529:exon11:c.A119T:p.E40V	5qA1
chr5	3713137	3713137	C	A	exonic	Ankib1	.	stopgain	Ankib1:NM_001289528:exon10:c.G769T:p.E257X,Ankib1:NM_001003909:exon11:c.G1591T:p.E531X,Ankib1:NM_001289527:exon11:c.G1591T:p.E531X,Ankib1:NM_001289529:exon11:c.G118T:p.E40X	5qA1
chr5	13570208	13570208	A	G	exonic	Sema3a	.	nonsynonymous SNV	Sema3a:NM_009152:exon12:c.A1423G:p.I475V,Sema3a:NM_001243072:exon13:c.A1423G:p.I475V,Sema3a:NM_001243073:exon13:c.A1423G:p.I475V	5qA1
chr5	14226456	14226456	G	A	exonic	Sema3e	.	nonsynonymous SNV	Sema3e:NM_011348:exon8:c.G854A:p.S285N	5qA1
chr5	14713153	14713153	T	C	exonic	Pclo	.	nonsynonymous SNV	Pclo:NM_001110796:exon7:c.T11639C:p.L3880S,Pclo:NM_011995:exon7:c.T11639C:p.L3880S	5qA1
chr5	14913539	14913539	C	G	exonic	Gm9758	.	nonsynonymous SNV	Gm9758:NM_198666:exon2:c.G274C:p.V92L	5qA2
chr5	14914768	14914768	T	G	exonic	Gm9758	.	nonsynonymous SNV	Gm9758:NM_198666:exon1:c.A62C:p.N21T	5qA2
chr5	15030219	15030219	A	C	exonic	Gm17019	.	nonsynonymous SNV	Gm17019:NM_182957:exon4:c.T578G:p.V193G	5qA2
chr5	15030267	15030267	G	C	exonic	Gm17019	.	nonsynonymous SNV	Gm17019:NM_182957:exon4:c.C530G:p.A177G	5qA2
chr5	15032879	15032879	A	C	exonic	Gm17019	.	nonsynonymous SNV	Gm17019:NM_182957:exon1:c.T60G:p.D20E	5qA2
chr5	15032910	15032910	A	C	exonic	Gm17019	.	nonsynonymous SNV	Gm17019:NM_182957:exon1:c.T29G:p.L10R	5qA2
chr5	15476412	15476412	G	C	exonic	Gm21149	.	nonsynonymous SNV	Gm21149:NM_001374725:exon1:c.C52G:p.R18G	5qA2
chr5	15524894	15524894	G	A	exonic	Gm21190	.	nonsynonymous SNV	Gm21190:NM_001310449:exon5:c.C725T:p.P242L	5qA2
chr5	15524974	15524974	A	C	exonic	Gm21190	.	nonsynonymous SNV	Gm21190:NM_001310449:exon5:c.T645G:p.D215E	5qA2
chr5	15526580	15526580	G	T	exonic	Gm21190	.	nonsynonymous SNV	Gm21190:NM_001310449:exon3:c.C407A:p.T136N	5qA2
chr5	15527935	15527935	A	C	exonic	Gm21190	.	nonsynonymous SNV	Gm21190:NM_001310449:exon2:c.T271G:p.Y91D	5qA2
chr5	15577458	15577458	T	G	exonic	Gm21083	.	nonsynonymous SNV	Gm21083:NM_001310450:exon1:c.T122G:p.V41G	5qA2
chr5	15620430	15620430	A	G	exonic	Speer4d	.	nonsynonymous SNV	Speer4d:NM_025759:exon2:c.A152G:p.E51G	5qA2
chr5	15714088	15714088	T	G	exonic	Speer4c	.	synonymous SNV	Speer4c:NM_001281511:exon1:c.A115C:p.R39R	5qA2
chr5	16194763	16194763	A	C	exonic	Cacna2d1	.	nonsynonymous SNV	Cacna2d1:NM_001110843:exon5:c.A363C:p.E121D,Cacna2d1:NM_001110844:exon5:c.A363C:p.E121D,Cacna2d1:NM_001110845:exon5:c.A363C:p.E121D,Cacna2d1:NM_001110846:exon5:c.A363C:p.E121D,Cacna2d1:NM_009784:exon5:c.A363C:p.E121D	5qA2
chr5	17479479	17479479	A	C	exonic	Speer4f1	.	nonsynonymous SNV	Speer4f1:NM_027609:exon4:c.A504C:p.E168D	5qA3
chr5	21196060	21196060	G	A	exonic	Gsap	.	nonsynonymous SNV	Gsap:NM_001359876:exon3:c.G190A:p.A64T,Gsap:NM_001359877:exon3:c.G190A:p.A64T,Gsap:NM_175437:exon3:c.G190A:p.A64T	5qA3
chr5	21986956	21986956	C	T	exonic	Reln	.	synonymous SNV	Reln:NM_001310464:exon30:c.G4485A:p.R1495R	5qA3
chr5	23768791	23768791	G	A	exonic	Pus7	.	nonsynonymous SNV	Pus7:NM_001289780:exon5:c.C704T:p.A235V,Pus7:NM_001289781:exon5:c.C704T:p.A235V,Pus7:NM_178403:exon5:c.C704T:p.A235V	5qA3
chr5	23805314	23805314	A	G	exonic	Rint1	.	nonsynonymous SNV	Rint1:NM_177323:exon5:c.A520G:p.N174D	5qA3
chr5	25338441	25338441	A	C	exonic	Kmt2c	.	synonymous SNV	Kmt2c:NM_001081383:exon27:c.T4215G:p.S1405S	5qA3
chr5	25938769	25938769	C	T	exonic	Gm21663	.	nonsynonymous SNV	Gm21663:NM_001378637:exon4:c.G554A:p.R185H	5qB1
chr5	25950723	25950723	G	T	exonic	Gm21671	.	nonsynonymous SNV	Gm21671:NM_001281516:exon4:c.C622A:p.H208N	5qB1
chr5	26000324	26000324	C	G	exonic	Gm1979	.	nonsynonymous SNV	Gm1979:NM_001281519:exon5:c.G652C:p.G218R	5qB1
chr5	26004677	26004677	A	G	exonic	Gm1979	.	synonymous SNV	Gm1979:NM_001281519:exon1:c.T51C:p.D17D	5qB1
chr5	26019348	26019348	G	T	exonic	Gm5862	.	nonsynonymous SNV	Gm5862:NM_001281525:exon4:c.C622A:p.H208N	5qB1
chr5	26035024	26035024	T	G	exonic	Speer4a	.	nonsynonymous SNV	Speer4a:NM_029376:exon5:c.A727C:p.T243P	5qB1
chr5	26035082	26035082	T	C	exonic	Speer4a	.	synonymous SNV	Speer4a:NM_029376:exon5:c.A669G:p.E223E	5qB1
chr5	26035916	26035916	A	C	exonic	Speer4a	.	nonsynonymous SNV	Speer4a:NM_029376:exon4:c.T577G:p.C193G	5qB1
chr5	26035943	26035943	C	G	exonic	Speer4a	.	nonsynonymous SNV	Speer4a:NM_029376:exon4:c.G550C:p.E184Q	5qB1
chr5	26036709	26036709	A	G	exonic	Speer4a	.	nonsynonymous SNV	Speer4a:NM_029376:exon3:c.T418C:p.F140L	5qB1
chr5	26039363	26039363	A	C	exonic	Speer4a	.	nonsynonymous SNV	Speer4a:NM_029376:exon1:c.T121G:p.W41G	5qB1
chr5	26039374	26039374	C	A	exonic	Speer4a	.	nonsynonymous SNV	Speer4a:NM_029376:exon1:c.G110T:p.G37V	5qB1
chr5	26039399	26039399	T	C	exonic	Speer4a	.	nonsynonymous SNV	Speer4a:NM_029376:exon1:c.A85G:p.N29D	5qB1
chr5	26089095	26089095	C	G	exonic	Gm10471	.	nonsynonymous SNV	Gm10471:NM_001177579:exon1:c.G84C:p.W28C	5qB1
chr5	26089122	26089122	A	C	exonic	Gm10471	.	nonsynonymous SNV	Gm10471:NM_001177579:exon1:c.T57G:p.S19R	5qB1
chr5	26089127	26089127	T	C	exonic	Gm10471	.	nonsynonymous SNV	Gm10471:NM_001177579:exon1:c.A52G:p.K18E	5qB1
chr5	26258984	26258984	C	T	exonic	Gm7361	.	nonsynonymous SNV	Gm7361:NM_001281527:exon2:c.C236T:p.T79I	5qB1
chr5	26258986	26258986	G	C	exonic	Gm7361	.	nonsynonymous SNV	Gm7361:NM_001281527:exon2:c.G238C:p.E80Q	5qB1
chr5	26258988	26258988	G	T	exonic	Gm7361	.	nonsynonymous SNV	Gm7361:NM_001281527:exon2:c.G240T:p.E80D	5qB1
chr5	27497092	27497092	T	C	exonic	Speer4b	.	synonymous SNV	Speer4b:NM_028561:exon5:c.A669G:p.E223E	5qB1
chr5	27497106	27497106	C	A	exonic	Speer4b	.	nonsynonymous SNV	Speer4b:NM_028561:exon5:c.G655T:p.V219L	5qB1
chr5	27501274	27501274	G	A	exonic	Speer4b	.	nonsynonymous SNV	Speer4b:NM_028561:exon1:c.C94T:p.P32S	5qB1
chr5	27501346	27501346	C	A	exonic	Speer4b	.	nonsynonymous SNV	Speer4b:NM_028561:exon1:c.G22T:p.G8C	5qB1
chr5	27501347	27501347	A	G	exonic	Speer4b	.	synonymous SNV	Speer4b:NM_028561:exon1:c.T21C:p.L7L	5qB1
chr5	29323816	29323816	C	A	exonic	Lmbr1	.	nonsynonymous SNV	Lmbr1:NM_020295:exon5:c.G409T:p.A137S	5qB1
chr5	32263717	32263717	A	C	exonic	Plb1	.	nonsynonymous SNV	Plb1:NM_001081407:exon4:c.A167C:p.K56T	5qB1
chr5	34420895	34420895	A	T	exonic	Fam193a	.	nonsynonymous SNV	Fam193a:NM_001243123:exon4:c.A735T:p.E245D	5qB2
chr5	34613400	34613400	T	A	exonic	Add1	.	stopgain	Add1:NM_001024458:exon7:c.T854A:p.L285X,Add1:NM_001102444:exon7:c.T854A:p.L285X,Add1:NM_001331081:exon7:c.T854A:p.L285X,Add1:NM_001331082:exon7:c.T854A:p.L285X,Add1:NM_001331083:exon7:c.T854A:p.L285X,Add1:NM_001331084:exon7:c.T854A:p.L285X,Add1:NM_001331085:exon7:c.T854A:p.L285X,Add1:NM_001331086:exon7:c.T854A:p.L285X,Add1:NM_001331087:exon7:c.T854A:p.L285X,Add1:NM_013457:exon7:c.T854A:p.L285X,Ad…	5qB2
chr5	36470614	36470614	C	T	exonic	Grpel1	.	nonsynonymous SNV	Grpel1:NM_024478:exon3:c.C238T:p.R80C	5qB3
chr5	36815356	36815356	C	T	exonic	Man2b2	.	nonsynonymous SNV	Man2b2:NM_008550:exon11:c.G1813A:p.D605N	5qB3
chr5	37120986	37120986	A	T	exonic	Jakmip1	.	nonsynonymous SNV	Jakmip1:NM_001347348:exon10:c.A1606T:p.I536F,Jakmip1:NM_178394:exon11:c.A1606T:p.I536F	5qB3
chr5	38300085	38300085	G	C	exonic	Otop1	.	nonsynonymous SNV	Otop1:NM_172709:exon5:c.G1187C:p.G396A	5qB3
chr5	38674293	38674293	C	A	exonic	Zfp518b	.	nonsynonymous SNV	Zfp518b:NM_001177902:exon3:c.G368T:p.S123I,Zfp518b:NM_001081144:exon4:c.G368T:p.S123I	5qB3
chr5	41808764	41808764	C	G	exonic	Bod1l	.	nonsynonymous SNV	Bod1l:NM_001081422:exon14:c.G7957C:p.V2653L,Bod1l:NM_001310601:exon14:c.G7957C:p.V2653L	5qB3
chr5	43979873	43979873	T	C	exonic	Fgfbp1	.	nonsynonymous SNV	Fgfbp1:NM_008009:exon2:c.A76G:p.R26G,Fgfbp1:NM_001271616:exon3:c.A76G:p.R26G	5qB3
chr5	48302353	48302353	A	G	exonic	Slit2	.	nonsynonymous SNV	Slit2:NM_178804:exon34:c.A3911G:p.Y1304C,Slit2:NM_001291228:exon35:c.A3923G:p.Y1308C,Slit2:NM_001291227:exon37:c.A3974G:p.Y1325C	5qB3
chr5	51474215	51474215	G	A	exonic	Ppargc1a	.	synonymous SNV	Ppargc1a:NM_008904:exon8:c.C1071T:p.L357L	5qC1
chr5	52760931	52760931	G	A	exonic	Pi4k2b	.	nonsynonymous SNV	Pi4k2b:NM_025951:exon8:c.G1100A:p.R367Q,Pi4k2b:NM_028744:exon8:c.G1031A:p.R344Q	5qC1
chr5	53116196	53116196	C	A	exonic	Sel1l3	.	nonsynonymous SNV	Sel1l3:NM_172710:exon23:c.G3241T:p.A1081S	5qC1
chr5	64925307	64925307	A	C	exonic	Tlr1	.	synonymous SNV	Tlr1:NM_030682:exon3:c.T1926G:p.A642A,Tlr1:NM_001276445:exon4:c.T1926G:p.A642A	5qC3.1
chr5	65618986	65618986	A	C	exonic	Pds5a	.	nonsynonymous SNV	Pds5a:NM_001081321:exon31:c.T3612G:p.I1204M	5qC3.1
chr5	72168109	72168109	T	C	exonic	Commd8	.	synonymous SNV	Commd8:NM_001356612:exon1:c.A36G:p.L12L,Commd8:NM_178599:exon1:c.A36G:p.L12L	5qC3.2
chr5	75166577	75166577	C	T	exonic	Pdgfra	.	nonsynonymous SNV	Pdgfra:NM_001083316:exon4:c.C434T:p.S145F,Pdgfra:NM_001347718:exon4:c.C434T:p.S145F,Pdgfra:NM_001347719:exon4:c.C434T:p.S145F,Pdgfra:NM_011058:exon4:c.C434T:p.S145F	5qC3.3
chr5	77282867	77282867	T	G	exonic	Rest	.	synonymous SNV	Rest:NM_011263:exon4:c.T3132G:p.S1044S	5qC3.3
chr5	77345401	77345401	G	A	exonic	Polr2b	.	nonsynonymous SNV	Polr2b:NM_153798:exon23:c.G3229A:p.G1077S	5qC3.3
chr5	77407548	77407548	C	A	exonic	Igfbp7	.	nonsynonymous SNV	Igfbp7:NM_001159518:exon1:c.G467T:p.C156F,Igfbp7:NM_008048:exon1:c.G467T:p.C156F	5qC3.3
chr5	81329882	81329882	C	A	exonic	Adgrl3	.	nonsynonymous SNV	Adgrl3:NM_001347368:exon4:c.C181A:p.H61N,Adgrl3:NM_001359830:exon4:c.C181A:p.H61N,Adgrl3:NM_001359831:exon4:c.C181A:p.H61N,Adgrl3:NM_001347367:exon5:c.C181A:p.H61N,Adgrl3:NM_001347369:exon5:c.C181A:p.H61N,Adgrl3:NM_001359828:exon5:c.C181A:p.H61N,Adgrl3:NM_001359832:exon5:c.C181A:p.H61N,Adgrl3:NM_001359834:exon5:c.C181A:p.H61N,Adgrl3:NM_198702:exon5:c.C181A:p.H61N	5qD
chr5	87842646	87842646	G	A	exonic	Prr27	.	nonsynonymous SNV	Prr27:NM_028648:exon4:c.G92A:p.R31H,Prr27:NM_001163551:exon5:c.G116A:p.R39H	5qE1
chr5	89684449	89684449	G	A	exonic	Adamts3	.	nonsynonymous SNV	Adamts3:NM_001081401:exon20:c.C2794T:p.R932C,Adamts3:NM_177872:exon20:c.C2797T:p.R933C	5qE1
chr5	90505015	90505015	G	C	exonic	Afp	.	nonsynonymous SNV	Afp:NM_007423:exon11:c.G1343C:p.G448A	5qE1
chr5	93043551	93043551	G	C	exonic	Sowahb	.	synonymous SNV	Sowahb:NM_175270:exon1:c.C1308G:p.P436P	5qE2
chr5	96262069	96262069	T	G	exonic	Mrpl1	.	nonsynonymous SNV	Mrpl1:NM_053158:exon8:c.T800G:p.M267R	5qE3
chr5	96743211	96743211	A	C	exonic	Fras1	.	nonsynonymous SNV	Fras1:NM_175473:exon57:c.A8598C:p.Q2866H	5qE3
chr5	101664149	101664149	G	C	exonic	Nkx6-1	.	nonsynonymous SNV	Nkx6-1:NM_144955:exon1:c.C86G:p.A29G	5qE4
chr5	103649568	103649568	G	A	exonic	1700016H13Rik	.	nonsynonymous SNV	1700016H13Rik:NM_001163550:exon3:c.C74T:p.P25L,1700016H13Rik:NM_028824:exon3:c.C74T:p.P25L	5qE5
chr5	104093335	104093335	A	G	exonic	Sparcl1	.	synonymous SNV	Sparcl1:NM_010097:exon4:c.T222C:p.T74T,Sparcl1:NM_001359014:exon5:c.T222C:p.T74T,Sparcl1:NM_001359016:exon5:c.T222C:p.T74T	5qE5
chr5	104498861	104498861	T	G	exonic	Pkd2	.	nonsynonymous SNV	Pkd2:NM_008861:exon12:c.T2338G:p.L780V	5qE5
chr5	105120997	105120997	A	T	exonic	Gbp4	.	nonsynonymous SNV	Gbp4:NM_001359080:exon7:c.T881A:p.F294Y,Gbp4:NM_001359081:exon7:c.T881A:p.F294Y,Gbp4:NM_001256005:exon8:c.T1289A:p.F430Y,Gbp4:NM_001359082:exon8:c.T881A:p.F294Y,Gbp4:NM_008620:exon8:c.T881A:p.F294Y,Gbp4:NM_001359079:exon9:c.T1328A:p.F443Y	5qE5
chr5	108087329	108087329	A	G	exonic	Mtf2	.	nonsynonymous SNV	Mtf2:NM_001253880:exon3:c.A110G:p.D37G,Mtf2:NM_001253879:exon5:c.A110G:p.D37G,Mtf2:NM_013827:exon5:c.A416G:p.D139G,Mtf2:NM_001253877:exon6:c.A110G:p.D37G,Mtf2:NM_001253878:exon6:c.A110G:p.D37G,Mtf2:NM_001359088:exon6:c.A449G:p.D150G,Mtf2:NM_001359089:exon7:c.A110G:p.D37G	5qF
chr5	108801998	108801998	A	C	exonic	Vmn2r8	.	nonsynonymous SNV	Vmn2r8:NM_001104620:exon3:c.T982G:p.F328V	5qF
chr5	109092780	109092780	G	T	exonic	Vmn2r12	.	nonsynonymous SNV	Vmn2r12:NM_001104623:exon2:c.C466A:p.H156N,Vmn2r12:NM_001385229:exon2:c.C466A:p.H156N	5qF
chr5	109340515	109340515	A	C	exonic	Vmn2r16	.	nonsynonymous SNV	Vmn2r16:NM_001104627:exon3:c.A1253C:p.Q418P,Vmn2r16:NM_001385189:exon3:c.A1253C:p.Q418P	5qF
[truncated: 632 more rows]
